# Supplementary material for: Acute exercise dynamically modulates the hepatic mitochondrial proteome
Source: Royal Society of Chemistry journal article supplement (doi:10.1039/d2mo00143h), 2022-07-29
Supplement: d2mo00143h1.xlsx [file d2mo00143h1.xlsx]

## Sheet: Sheet1
Supplemental Table 1. Samples description. Two different injections and treatments are included in this study.
Sample ID	Condition (Short Code)	Time (hr.)	Injection	Treatment	Concentration (ug/uL)	uL sent (for 100ug)
32	LeuEx0	0	Leupeptin	Exercise	1.82649	0
40	LeuEx0	0	Leupeptin	Exercise	4.2502	0
46	LeuEx0	0	Leupeptin	Exercise	4.63586	0	not used
79	LeuEx0	0	Leupeptin	Exercise	3.16593	0
87	LeuEx0	0	Leupeptin	Exercise	5.04801	0
34	LeuEx2	2	Leupeptin	Exercise	3.95629	0
42	LeuEx2	2	Leupeptin	Exercise	3.81821	0
50	LeuEx2	2	Leupeptin	Exercise	3.95411	0
81	LeuEx2	2	Leupeptin	Exercise	4.203	0
89	LeuEx2	2	Leupeptin	Exercise	5.18885	0
28	LeuSed0	0	Leupeptin	Sedentary	2.65165	0
36	LeuSed0	0	Leupeptin	Sedentary	4.09151	0
44	LeuSed0	0	Leupeptin	Sedentary	4.91118	0
75	LeuSed0	0	Leupeptin	Sedentary	3.86371	0
83	LeuSed0	0	Leupeptin	Sedentary	5.36169	0
30	LeuSed2	2	Leupeptin	Sedentary	2.10155	0
38	LeuSed2	2	Leupeptin	Sedentary	2.59279	0
48	LeuSed2	2	Leupeptin	Sedentary	4.4982	0
77	LeuSed2	2	Leupeptin	Sedentary	3.78049	0
85	LeuSed2	2	Leupeptin	Sedentary	3.57564	0
31	SalEx0	0	Saline	Exercise	2.4435	0
39	SalEx0	0	Saline	Exercise	3.7565	0
45	SalEx0	0	Saline	Exercise	1.93838	0
78	SalEx0	0	Saline	Exercise	4.38864	0
86	SalEx0	0	Saline	Exercise	3.85091	0
33	SalEx2	2	Saline	Exercise	3.35043	0
41	SalEx2	2	Saline	Exercise	4.15763	0
47	SalEx2	2	Saline	Exercise	2.4628	0
80	SalEx2	2	Saline	Exercise	3.76768	0
88	SalEx2	2	Saline	Exercise	3.97254	0
27	SalSed0	0	Saline	Sedentary	1.19946	0
35	SalSed0	0	Saline	Sedentary	3.65512	0
43	SalSed0	0	Saline	Sedentary	3.69518	0
74	SalSed0	0	Saline	Sedentary	3.62685	0	not used
82	SalSed0	0	Saline	Sedentary	3.77409	0
29	SalSed2	2	Saline	Sedentary	2.4212	0
37	SalSed2	2	Saline	Sedentary	4.09151	0
49	SalSed2	2	Saline	Sedentary	2.961	0
76	SalSed2	2	Saline	Sedentary	3.55643	0
84	SalSed2	2	Saline	Sedentary	3.18514	0
