# Supplementary material for: Acute exercise dynamically modulates the hepatic mitochondrial proteome
Source: Royal Society of Chemistry journal article supplement (doi:10.1039/d2mo00143h), 2022-07-29
Supplement: d2mo00143h2.xlsx [file d2mo00143h2.xlsx]

## Sheet: Raw_intensity_values
Supplemental Table 2.Proteins detected in the 38 samples. Raw intensity values are reported in here.
Protein IDs	Protein names	Gene names	fasta header	Protein	S.32	S.40	S.79	S.87	S.34	S.42	S.50	S.81	S.89	S.28	S.36	S.44	S.75	S.83	S.30	S.38	S.48	S.77	S.85	S.31	S.39	S.45	S.78	S.86	S.33	S.41	S.47	S.80	S.88	S.27	S.35	S.43	S.82	S.29	S.37	S.49	S.76	S.84
A0A0B4J1G0	FCGR4_MOUSE Low affinity immunoglobulin gamma Fc region receptor IV OS=Mus musculus OX=10090 GN=Fcgr4 PE=1 SV=1	Fcgr4	sp|A0A0B4J1G0|FCGR4_MOUSE Low affinity immunoglobulin gamma Fc region receptor IV OS=Mus musculus OX=10090 GN=Fcgr4 PE=1 SV=1	sp|A0A0B4J1G0|FCGR4_MOUSE Low affinity immunoglobulin gamma Fc region receptor IV OS=Mus musculus OX=10090 GN=Fcgr4 PE=1 SV=1	103754	61015.1	352447	417632	57326.2	5500.22	113690	67269.9	105895	66809.7	0	200220	283605	253805	13753.1	0	128768	208528	13701.9	0	145597	171292	134645	17032.5	123518	6324.24	220750	397610	118533	79147.6	103528	23840.2	116594	54048.6	0	72160.9	100492	720770
A0JNU3	LPP60_MOUSE 60 kDa lysophospholipase OS=Mus musculus OX=10090 GN=Aspg PE=1 SV=1	Aspg	sp|A0JNU3|LPP60_MOUSE 60 kDa lysophospholipase OS=Mus musculus OX=10090 GN=Aspg PE=1 SV=1	sp|A0JNU3|LPP60_MOUSE 60 kDa lysophospholipase OS=Mus musculus OX=10090 GN=Aspg PE=1 SV=1	753990	548810	823195	280447	630183	172324	588184	636851	596365	1831516	901053	832488	476143	212483	507969	787773	452728	435543	634988	457399	143235	1302777	236921	76943.1	207500	337824	311159	775040	470034	1173306	352108	549839	916108	52066.4	320224	1153412	221057	196528
A1L314	MPEG1_MOUSE Macrophage-expressed gene 1 protein OS=Mus musculus OX=10090 GN=Mpeg1 PE=1 SV=1	Mpeg1	sp|A1L314|MPEG1_MOUSE Macrophage-expressed gene 1 protein OS=Mus musculus OX=10090 GN=Mpeg1 PE=1 SV=1	sp|A1L314|MPEG1_MOUSE Macrophage-expressed gene 1 protein OS=Mus musculus OX=10090 GN=Mpeg1 PE=1 SV=1	5648878	4803509	27534700	30124240	7317620	6331811	11663320	7659007	6519850	6517917	7884693	6140790	31420970	17325660	5908305	5028058	11119380	4014082	7056517	3008894	7093648	6248817	9784402	5546689	4237359	7676670	22948940	29098650	7358856	5418405	5208841	9561478	6156222	5700667	5678609	8669785	7819868	28152890
A1L317	K1C24_MOUSE Keratin, type I cytoskeletal 24 OS=Mus musculus OX=10090 GN=Krt24 PE=2 SV=2	Krt24	sp|A1L317|K1C24_MOUSE Keratin, type I cytoskeletal 24 OS=Mus musculus OX=10090 GN=Krt24 PE=2 SV=2	sp|A1L317|K1C24_MOUSE Keratin, type I cytoskeletal 24 OS=Mus musculus OX=10090 GN=Krt24 PE=2 SV=2	16384250	9489440	9105791	4285320	7113092	7025802	3882192	4021016	4485650	14438900	5062152	9448062	6848886	2773931	7951521	1754013	9735014	3852228	4223549	11163790	2446695	10216060	6387322	2934013	6248659	6078111	9353927	5949982	4079211	4527928	5529888	6864394	4773001	7813354	8112441	4444070	4465008	4932949
A2A5R2	BIG2_MOUSE Brefeldin A-inhibited guanine nucleotide-exchange protein 2 OS=Mus musculus OX=10090 GN=Arfgef2 PE=1 SV=1	Arfgef2	sp|A2A5R2|BIG2_MOUSE Brefeldin A-inhibited guanine nucleotide-exchange protein 2 OS=Mus musculus OX=10090 GN=Arfgef2 PE=1 SV=1	sp|A2A5R2|BIG2_MOUSE Brefeldin A-inhibited guanine nucleotide-exchange protein 2 OS=Mus musculus OX=10090 GN=Arfgef2 PE=1 SV=1	593655	1167528	1840319	1204168	1099700	1092083	1316584	2616038	1292087	1007062	1393858	3052639	1476114	1360803	1077466	1184289	2399086	1336076	1950647	2005485	2803752	2180877	3140755	983110	3514778	1662590	5064938	4563539	1643926	885894	802196	1818521	2946947	2680925	2385921	2048404	1778076	2835020
A2A8L5	PTPRF_MOUSE Receptor-type tyrosine-protein phosphatase F OS=Mus musculus OX=10090 GN=Ptprf PE=1 SV=1	Ptprf	sp|A2A8L5|PTPRF_MOUSE Receptor-type tyrosine-protein phosphatase F OS=Mus musculus OX=10090 GN=Ptprf PE=1 SV=1	sp|A2A8L5|PTPRF_MOUSE Receptor-type tyrosine-protein phosphatase F OS=Mus musculus OX=10090 GN=Ptprf PE=1 SV=1	14045280	15620420	12506690	11076560	12127450	11211610	9796851	11645310	10718900	11818820	12774610	13295330	13836110	13702090	9058316	12163680	13995620	13815410	20781550	11756480	8333316	14270990	11066020	13170320	5670366	7031049	13825650	13717460	13896200	12276250	7388861	10610600	25008440	6278134	7810352	9003187	10816890	8149776
A2ADY9	DDI2_MOUSE Protein DDI1 homolog 2 OS=Mus musculus OX=10090 GN=Ddi2 PE=1 SV=1	Ddi2	sp|A2ADY9|DDI2_MOUSE Protein DDI1 homolog 2 OS=Mus musculus OX=10090 GN=Ddi2 PE=1 SV=1	sp|A2ADY9|DDI2_MOUSE Protein DDI1 homolog 2 OS=Mus musculus OX=10090 GN=Ddi2 PE=1 SV=1	3824598	3216551	2024336	850769	4576153	3563412	3233821	4389293	4291908	5790039	4596986	3203441	2822259	1108011	3662687	2627339	3228241	2306681	5684497	623018	1143411	1869550	929953	1128803	560250	849864	853951	839518	1436513	831814	1587433	1111810	1729168	886429	758320	979537	1420523	665822
A2AGT5	CKAP5_MOUSE Cytoskeleton-associated protein 5 OS=Mus musculus OX=10090 GN=Ckap5 PE=1 SV=1	Ckap5	sp|A2AGT5|CKAP5_MOUSE Cytoskeleton-associated protein 5 OS=Mus musculus OX=10090 GN=Ckap5 PE=1 SV=1	sp|A2AGT5|CKAP5_MOUSE Cytoskeleton-associated protein 5 OS=Mus musculus OX=10090 GN=Ckap5 PE=1 SV=1	2458819	2650172	4016290	3151782	4351677	2503684	6556245	5020903	1943396	2842017	3743213	2287726	1425753	6253999	4403281	3797575	7092581	3829346	1271299	5609101	8154368	3206488	9510760	5204108	9218690	9494150	15858120	14059310	9983720	2755593	5300759	5018004	7922050	8212393	8605854	8722911	5656220	6639844
A2AIL4	NDUF6_MOUSE NADH dehydrogenase (ubiquinone) complex I, assembly factor 6 OS=Mus musculus OX=10090 GN=Ndufaf6 PE=1 SV=1	Ndufaf6	sp|A2AIL4|NDUF6_MOUSE NADH dehydrogenase (ubiquinone) complex I, assembly factor 6 OS=Mus musculus OX=10090 GN=Ndufaf6 PE=1 SV=1	sp|A2AIL4|NDUF6_MOUSE NADH dehydrogenase (ubiquinone) complex I, assembly factor 6 OS=Mus musculus OX=10090 GN=Ndufaf6 PE=1 SV=1	385370	277635	284998	309176	540363	623786	137799	489047	689091	1116911	401617	248347	190226	134255	386290	335243	351131	251033	192179	263620	126195	353526	332492	337763	275300	155400	243532	602444	138750	109635	416218	297625	462563	332043	323265	273770	208842	79618.8
A2AJ15	MA1B1_MOUSE Endoplasmic reticulum mannosyl-oligosaccharide 1,2-alpha-mannosidase OS=Mus musculus OX=10090 GN=Man1b1 PE=1 SV=1	Man1b1	sp|A2AJ15|MA1B1_MOUSE Endoplasmic reticulum mannosyl-oligosaccharide 1,2-alpha-mannosidase OS=Mus musculus OX=10090 GN=Man1b1 PE=1 SV=1	sp|A2AJ15|MA1B1_MOUSE Endoplasmic reticulum mannosyl-oligosaccharide 1,2-alpha-mannosidase OS=Mus musculus OX=10090 GN=Man1b1 PE=1 SV=1	5251796	7908770	9944204	17166380	6883118	6811801	10841630	29428240	14220990	7054859	11470570	27404320	8289595	7734861	9368780	4824625	7097801	6601260	6962770	4513945	6168441	16385920	6279375	8245461	2984740	8290387	19902370	10096840	8769726	2807307	10235940	12944490	9305026	5531120	5884739	13842530	7979666	14139890
A2AJ88	PLPL7_MOUSE Patatin-like phospholipase domain-containing protein 7 OS=Mus musculus OX=10090 GN=Pnpla7 PE=1 SV=1	Pnpla7	sp|A2AJ88|PLPL7_MOUSE Patatin-like phospholipase domain-containing protein 7 OS=Mus musculus OX=10090 GN=Pnpla7 PE=1 SV=1	sp|A2AJ88|PLPL7_MOUSE Patatin-like phospholipase domain-containing protein 7 OS=Mus musculus OX=10090 GN=Pnpla7 PE=1 SV=1	1111981	808723	1872260	1136736	764880	495974	1816400	1831072	1126076	1208774	788147	3591678	1193454	1002755	729422	2220471	1629675	1432363	1586926	1992393	1367348	3646449	2053999	1722459	1762960	693128	3400761	2294745	2449238	325758	728780	1141632	2045617	705958	1911320	2056438	3836088	1510556
A2AJL3	FGGY_MOUSE FGGY carbohydrate kinase domain-containing protein OS=Mus musculus OX=10090 GN=Fggy PE=1 SV=1	Fggy	sp|A2AJL3|FGGY_MOUSE FGGY carbohydrate kinase domain-containing protein OS=Mus musculus OX=10090 GN=Fggy PE=1 SV=1	sp|A2AJL3|FGGY_MOUSE FGGY carbohydrate kinase domain-containing protein OS=Mus musculus OX=10090 GN=Fggy PE=1 SV=1	9193845	7959968	7551889	5971448	8854704	6108056	8134052	7819096	9597491	7502969	7010945	10940230	7809898	4896063	8057113	8539121	6426963	6943272	10185440	4260975	5170664	13244160	9763873	4718985	4975956	4158298	7233846	6230074	9521051	2282944	2607959	7119131	9802327	1560300	5683661	5710809	7848598	3510274
A2AKK5	ACNT1_MOUSE Acyl-coenzyme A amino acid N-acyltransferase 1 OS=Mus musculus OX=10090 GN=Acnat1 PE=1 SV=1	Acnat1	sp|A2AKK5|ACNT1_MOUSE Acyl-coenzyme A amino acid N-acyltransferase 1 OS=Mus musculus OX=10090 GN=Acnat1 PE=1 SV=1	sp|A2AKK5|ACNT1_MOUSE Acyl-coenzyme A amino acid N-acyltransferase 1 OS=Mus musculus OX=10090 GN=Acnat1 PE=1 SV=1	132827500	140878500	158392200	141445500	98818280	116326500	144853100	126659900	110744500	138179000	157255800	232364100	137740300	117034400	147702500	132705700	133505100	123982600	136263500	245834100	202216500	169235600	188164700	148529300	182835800	207956800	244314400	189478200	226081100	135314300	150014500	144492200	204556800	173083400	228602200	165650000	183929100	157852600
A2AKQ0	S35D1_MOUSE UDP-glucuronic acid/UDP-N-acetylgalactosamine transporter OS=Mus musculus OX=10090 GN=Slc35d1 PE=2 SV=2	Slc35d1	sp|A2AKQ0|S35D1_MOUSE UDP-glucuronic acid/UDP-N-acetylgalactosamine transporter OS=Mus musculus OX=10090 GN=Slc35d1 PE=2 SV=2	sp|A2AKQ0|S35D1_MOUSE UDP-glucuronic acid/UDP-N-acetylgalactosamine transporter OS=Mus musculus OX=10090 GN=Slc35d1 PE=2 SV=2	1908372	7704340	16361130	14666790	1051097	4185419	7552428	5711455	14311630	1224168	8387787	6759166	9937852	9237759	2932570	7803529	4669594	9762093	12750170	1638000	14643910	17846910	16077900	16410840	2931112	7626163	23382490	16338600	17592790	4601177	5758131	12727390	16063200	3066752	10702180	21259700	12391160	15895020
A2ALW5	DJC25_MOUSE DnaJ homolog subfamily C member 25 OS=Mus musculus OX=10090 GN=Dnajc25 PE=1 SV=1	Dnajc25	sp|A2ALW5|DJC25_MOUSE DnaJ homolog subfamily C member 25 OS=Mus musculus OX=10090 GN=Dnajc25 PE=1 SV=1	sp|A2ALW5|DJC25_MOUSE DnaJ homolog subfamily C member 25 OS=Mus musculus OX=10090 GN=Dnajc25 PE=1 SV=1	3866079	5944993	11623610	12126430	3388175	5202394	12321510	12261390	15446700	2236564	11697490	12041480	11780140	10711480	4466337	6479643	11802300	6649452	9392613	3387033	8260149	10761660	14766960	12071690	2507924	5951935	16975580	18672870	17964610	3239877	8164195	10226430	24304860	7695472	8038751	13166060	11493720	10528650
A2AN08	UBR4_MOUSE E3 ubiquitin-protein ligase UBR4 OS=Mus musculus OX=10090 GN=Ubr4 PE=1 SV=1	Ubr4	sp|A2AN08|UBR4_MOUSE E3 ubiquitin-protein ligase UBR4 OS=Mus musculus OX=10090 GN=Ubr4 PE=1 SV=1	sp|A2AN08|UBR4_MOUSE E3 ubiquitin-protein ligase UBR4 OS=Mus musculus OX=10090 GN=Ubr4 PE=1 SV=1	8547779	6349752	7534537	4345045	8285146	6018537	4948339	8219673	6398040	8063006	6065805	6451801	7041997	3498658	8036571	6571552	5507233	5801697	6675736	6718760	5078380	9232507	6324933	4081312	6688377	6785719	8583432	6292267	3900829	5368202	5713688	5446223	6123695	6213222	1239960	5285265	5660780	1762111
A2APT9	KLD7A_MOUSE Kelch domain-containing protein 7A OS=Mus musculus OX=10090 GN=Klhdc7a PE=1 SV=3	Klhdc7a	sp|A2APT9|KLD7A_MOUSE Kelch domain-containing protein 7A OS=Mus musculus OX=10090 GN=Klhdc7a PE=1 SV=3	sp|A2APT9|KLD7A_MOUSE Kelch domain-containing protein 7A OS=Mus musculus OX=10090 GN=Klhdc7a PE=1 SV=3	460559	573646	342989	515576	742589	716859	391731	652022	308727	891749	662475	581787	621288	357428	204080	172907	492426	154435	320523	1511918	628671	204813	735331	347865	815499	270398	1235212	732835	1125217	236098	417550	744083	1014164	715624	905302	656407	1139523	515396
A2APV2	FMNL2_MOUSE Formin-like protein 2 OS=Mus musculus OX=10090 GN=Fmnl2 PE=1 SV=2	Fmnl2	sp|A2APV2|FMNL2_MOUSE Formin-like protein 2 OS=Mus musculus OX=10090 GN=Fmnl2 PE=1 SV=2	sp|A2APV2|FMNL2_MOUSE Formin-like protein 2 OS=Mus musculus OX=10090 GN=Fmnl2 PE=1 SV=2	1142699	586196	617458	622283	1547331	752820	1185016	509703	594174	1760015	410561	1034174	557670	446552	1181944	446110	375852	518100	1369501	2653774	971858	770466	549168	354310	2134879	240208	1284293	643732	939607	1607926	206786	785948	1386460	2026172	361704	895229	1010155	1601663
A2APY7	NDUF5_MOUSE Arginine-hydroxylase NDUFAF5, mitochondrial OS=Mus musculus OX=10090 GN=Ndufaf5 PE=1 SV=1	Ndufaf5	sp|A2APY7|NDUF5_MOUSE Arginine-hydroxylase NDUFAF5, mitochondrial OS=Mus musculus OX=10090 GN=Ndufaf5 PE=1 SV=1	sp|A2APY7|NDUF5_MOUSE Arginine-hydroxylase NDUFAF5, mitochondrial OS=Mus musculus OX=10090 GN=Ndufaf5 PE=1 SV=1	528533	332285	380284	157125	318919	151192	70099.7	249919	84897	588345	232014	229531	88095.1	66543.2	361017	105116	140687	65612.1	19475.5	1152245	213190	361883	257075	106518	623540	439746	832306	649037	55093.9	321126	315987	214390	361803	729710	395279	367180	382285	199689
A2ARV4	LRP2_MOUSE Low-density lipoprotein receptor-related protein 2 OS=Mus musculus OX=10090 GN=Lrp2 PE=1 SV=1	Lrp2	sp|A2ARV4|LRP2_MOUSE Low-density lipoprotein receptor-related protein 2 OS=Mus musculus OX=10090 GN=Lrp2 PE=1 SV=1	sp|A2ARV4|LRP2_MOUSE Low-density lipoprotein receptor-related protein 2 OS=Mus musculus OX=10090 GN=Lrp2 PE=1 SV=1	98638340	46264910	30708150	26565370	33398940	24588810	34735750	40848130	31640870	37854280	29171140	32390490	32795470	21786800	31444710	27052960	33686270	22106820	46501520	2530325000	32816140	41921380	25406610	30771330	27928940	37715010	35590130	28321800	30146080	25608030	22463040	32420410	39184510	28792450	36582950	30199850	31186770	32748010
A2AS89	SPEB_MOUSE Agmatinase, mitochondrial OS=Mus musculus OX=10090 GN=Agmat PE=1 SV=1	Agmat	sp|A2AS89|SPEB_MOUSE Agmatinase, mitochondrial OS=Mus musculus OX=10090 GN=Agmat PE=1 SV=1	sp|A2AS89|SPEB_MOUSE Agmatinase, mitochondrial OS=Mus musculus OX=10090 GN=Agmat PE=1 SV=1	379218800	276506100	226045400	159524500	540787300	281691500	216539900	309350500	146771700	467444600	315807200	356765200	210789800	125203700	397988600	204926400	270018600	165618400	119056000	458878200	273437600	343587600	283333000	111721000	680203300	509692000	407186800	361971100	171786600	338180100	386797300	315097200	262974900	619546900	415316000	325323700	329571800	165196700
A2ASZ8	SCMC2_MOUSE Calcium-binding mitochondrial carrier protein SCaMC-2 OS=Mus musculus OX=10090 GN=Slc25a25 PE=1 SV=1	Slc25a25	sp|A2ASZ8|SCMC2_MOUSE Calcium-binding mitochondrial carrier protein SCaMC-2 OS=Mus musculus OX=10090 GN=Slc25a25 PE=1 SV=1	sp|A2ASZ8|SCMC2_MOUSE Calcium-binding mitochondrial carrier protein SCaMC-2 OS=Mus musculus OX=10090 GN=Slc25a25 PE=1 SV=1	15963770	10156230	17212430	5686976	11611170	9454859	7152759	10830960	7150953	16286340	12804830	10147670	9082745	5775861	13739740	8550473	9651225	8880720	5993650	14818720	10271030	12943980	14255880	6656654	11458390	10335180	14926450	12100940	6194612	8082125	12472090	9603341	7671884	17035610	13511240	8904446	10983110	7307729
A2ATU0	DHTK1_MOUSE Probable 2-oxoglutarate dehydrogenase E1 component DHKTD1, mitochondrial OS=Mus musculus OX=10090 GN=Dhtkd1 PE=1 SV=1	Dhtkd1	sp|A2ATU0|DHTK1_MOUSE Probable 2-oxoglutarate dehydrogenase E1 component DHKTD1, mitochondrial OS=Mus musculus OX=10090 GN=Dhtkd1 PE=1 SV=1	sp|A2ATU0|DHTK1_MOUSE Probable 2-oxoglutarate dehydrogenase E1 component DHKTD1, mitochondrial OS=Mus musculus OX=10090 GN=Dhtkd1 PE=1 SV=1	50775210	29388750	26559100	18196540	54013160	29672780	17354260	30864890	14727790	47949360	37838530	33257730	20416590	10886420	45244890	21374620	20860350	21401040	12914800	53759760	33571920	35998940	23422110	14048110	49774910	44921410	22747070	20409550	14836430	36787890	31095550	22992850	24065160	41034640	30007290	17407520	33081240	11195070
A2AVZ9	S43A3_MOUSE Solute carrier family 43 member 3 OS=Mus musculus OX=10090 GN=Slc43a3 PE=1 SV=1	Slc43a3	sp|A2AVZ9|S43A3_MOUSE Solute carrier family 43 member 3 OS=Mus musculus OX=10090 GN=Slc43a3 PE=1 SV=1	sp|A2AVZ9|S43A3_MOUSE Solute carrier family 43 member 3 OS=Mus musculus OX=10090 GN=Slc43a3 PE=1 SV=1	2194819	2538815	4519658	3721760	932386	2624240	1948783	2999339	2154920	1888275	1055309	3521852	3826585	1760055	2134193	2139977	1831092	3088771	2015555	2430995	1837361	4944358	4003799	3239063	2465404	2267934	5194055	4946965	3726736	2144234	2939004	3501301	3457526	2924496	3389708	5064871	2864699	2823291
A2CG49	KALRN_MOUSE Kalirin OS=Mus musculus OX=10090 GN=Kalrn PE=1 SV=1	Kalrn	sp|A2CG49|KALRN_MOUSE Kalirin OS=Mus musculus OX=10090 GN=Kalrn PE=1 SV=1	sp|A2CG49|KALRN_MOUSE Kalirin OS=Mus musculus OX=10090 GN=Kalrn PE=1 SV=1	346046	725677	924767	439897	428253	647252	520497	236189	668989	372215	1680570	488271	579299	1330558	938205	1231521	353695	997568	1460887	262883	1114234	914192	651542	1480130	165750	206801	784476	368306	1288056	226416	401407	647042	1648466	179448	607279	952427	612486	475463
A3KMP2	TTC38_MOUSE Tetratricopeptide repeat protein 38 OS=Mus musculus OX=10090 GN=Ttc38 PE=1 SV=2	Ttc38	sp|A3KMP2|TTC38_MOUSE Tetratricopeptide repeat protein 38 OS=Mus musculus OX=10090 GN=Ttc38 PE=1 SV=2	sp|A3KMP2|TTC38_MOUSE Tetratricopeptide repeat protein 38 OS=Mus musculus OX=10090 GN=Ttc38 PE=1 SV=2	27234160	27405490	25563620	21478220	26365830	26481150	25727410	28838670	34257880	29758390	30522330	48634340	28566170	19804370	20905180	33040800	36323230	23291840	32252190	10673620	24050310	43678420	30823070	25840760	24663270	17417230	26818460	28383210	33873570	15206880	20580440	36555080	41121140	11664440	18465670	20384140	29267610	16550410
A6H611	MIPEP_MOUSE Mitochondrial intermediate peptidase OS=Mus musculus OX=10090 GN=Mipep PE=1 SV=1	Mipep	sp|A6H611|MIPEP_MOUSE Mitochondrial intermediate peptidase OS=Mus musculus OX=10090 GN=Mipep PE=1 SV=1	sp|A6H611|MIPEP_MOUSE Mitochondrial intermediate peptidase OS=Mus musculus OX=10090 GN=Mipep PE=1 SV=1	32608080	20683150	23567340	18828660	39520480	26421700	19178390	21338230	12344940	28925240	22285680	21595630	22429300	12896880	25791020	20166020	22183190	19800570	12291350	30056620	16345720	27062430	20051260	13403430	41679600	20448830	34570170	29340040	15391620	26323750	20231420	16974010	22958460	31333670	18076760	19048880	19503970	12729610
A6X919	D19L1_MOUSE Probable C-mannosyltransferase DPY19L1 OS=Mus musculus OX=10090 GN=Dpy19l1 PE=1 SV=1	Dpy19l1	sp|A6X919|D19L1_MOUSE Probable C-mannosyltransferase DPY19L1 OS=Mus musculus OX=10090 GN=Dpy19l1 PE=1 SV=1	sp|A6X919|D19L1_MOUSE Probable C-mannosyltransferase DPY19L1 OS=Mus musculus OX=10090 GN=Dpy19l1 PE=1 SV=1	2410273	7279764	12228170	12397860	2025828	6020950	7114490	10766950	7932878	3889462	7639388	7096110	8539656	8191024	4600960	7240664	9152299	7252185	8064945	1609480	3551706	14069700	5286055	9604058	2078625	5899217	17161050	13371710	9519703	3163590	6277376	9987261	16915590	7657964	6462627	12516110	6189636	11012270
A6X935	ITIH4_MOUSE Inter alpha-trypsin inhibitor, heavy chain 4 OS=Mus musculus OX=10090 GN=Itih4 PE=1 SV=2	Itih4	sp|A6X935|ITIH4_MOUSE Inter alpha-trypsin inhibitor, heavy chain 4 OS=Mus musculus OX=10090 GN=Itih4 PE=1 SV=2	sp|A6X935|ITIH4_MOUSE Inter alpha-trypsin inhibitor, heavy chain 4 OS=Mus musculus OX=10090 GN=Itih4 PE=1 SV=2	48934350	71041940	115304600	81343290	67645110	86178710	134750100	127653400	90908870	69398120	91830700	64583640	92365520	142438200	141476800	156505100	126834400	120866800	160464300	15199190	101173500	93465150	87514020	91550430	19875620	70556880	146105400	153505800	111410100	23598800	47596200	72342430	159950400	75190340	77280280	119579800	111460000	117022900
A7MCT6	EKI2_MOUSE Ethanolamine kinase 2 OS=Mus musculus OX=10090 GN=Etnk2 PE=1 SV=1	Etnk2	sp|A7MCT6|EKI2_MOUSE Ethanolamine kinase 2 OS=Mus musculus OX=10090 GN=Etnk2 PE=1 SV=1	sp|A7MCT6|EKI2_MOUSE Ethanolamine kinase 2 OS=Mus musculus OX=10090 GN=Etnk2 PE=1 SV=1	1393908	224145	112324	32967.7	203471	138856	87930	209493	111946	106183	138700	53264.6	8530.04	42031.6	344688	239709	79103.1	133458	81861.7	724747	217906	194696	194836	66226.3	58501.7	334790	231188	161654	68973.1	880313	208804	100139	53154.4	292552	103609	99746.8	82662.2	56246.8
B1AUE5	PEX10_MOUSE Peroxisome biogenesis factor 10 OS=Mus musculus OX=10090 GN=Pex10 PE=2 SV=1	Pex10	sp|B1AUE5|PEX10_MOUSE Peroxisome biogenesis factor 10 OS=Mus musculus OX=10090 GN=Pex10 PE=2 SV=1	sp|B1AUE5|PEX10_MOUSE Peroxisome biogenesis factor 10 OS=Mus musculus OX=10090 GN=Pex10 PE=2 SV=1	33520830	35108600	55233340	62163670	28451830	37985010	43175150	49135060	41571430	35810110	32517590	44592170	52519860	41684230	50659550	39419810	40636230	45652580	44281140	21559170	33953590	48680390	50860530	51565810	41382030	32854720	52675550	46888550	51156230	33950460	32224510	46093540	71239870	50939050	49309350	45661700	40723770	36901800
B1AY13	UBP24_MOUSE Ubiquitin carboxyl-terminal hydrolase 24 OS=Mus musculus OX=10090 GN=Usp24 PE=1 SV=1	Usp24	sp|B1AY13|UBP24_MOUSE Ubiquitin carboxyl-terminal hydrolase 24 OS=Mus musculus OX=10090 GN=Usp24 PE=1 SV=1	sp|B1AY13|UBP24_MOUSE Ubiquitin carboxyl-terminal hydrolase 24 OS=Mus musculus OX=10090 GN=Usp24 PE=1 SV=1	1634899	942770	12977350	13828990	3299567	10751940	10500250	18145130	16687070	4728451	10442320	14165880	13130990	11777150	8051762	11438140	14573980	17297130	14645180	4095591	12448170	20972400	27538150	15904150	7951757	11637430	21947590	13625630	23821300	4987513	10809580	14535220	22687380	12036740	21928920	27038110	20332520	17901450
B2RPV6	MMRN1_MOUSE Multimerin-1 OS=Mus musculus OX=10090 GN=Mmrn1 PE=1 SV=2	Mmrn1	sp|B2RPV6|MMRN1_MOUSE Multimerin-1 OS=Mus musculus OX=10090 GN=Mmrn1 PE=1 SV=2	sp|B2RPV6|MMRN1_MOUSE Multimerin-1 OS=Mus musculus OX=10090 GN=Mmrn1 PE=1 SV=2	17756	79982.4	22197.3	10588.3	49738	5459.54	22666.5	127520	8885.44	142316	78510.5	0	18003.6	28306.5	14054.9	22787.4	36166.7	41959.5	35406.1	0	45675.7	41351.9	28685.6	11584	29226	27607	22299.5	0	0	23378.7	27764.3	0	66533.5	26826.2	10141.3	0	32620.3	10735.7
B2RQC6	PYR1_MOUSE CAD protein OS=Mus musculus OX=10090 GN=Cad PE=1 SV=1	Cad	sp|B2RQC6|PYR1_MOUSE CAD protein OS=Mus musculus OX=10090 GN=Cad PE=1 SV=1	sp|B2RQC6|PYR1_MOUSE CAD protein OS=Mus musculus OX=10090 GN=Cad PE=1 SV=1	1695484	3235114	3655781	2459902	2556929	1685088	2659835	3862282	1211666	1830529	1450829	1669004	3352503	2194976	914404	2698043	2917534	1418464	1265725	1016504	4570363	2619501	1486446	3491267	3151685	2026702	6235549	4051674	3300223	1451738	1930409	2417968	2113428	2685028	3110839	870578	3876718	3879686
B2RX12	MRP3_MOUSE Canalicular multispecific organic anion transporter 2 OS=Mus musculus OX=10090 GN=Abcc3 PE=1 SV=1	Abcc3	sp|B2RX12|MRP3_MOUSE Canalicular multispecific organic anion transporter 2 OS=Mus musculus OX=10090 GN=Abcc3 PE=1 SV=1	sp|B2RX12|MRP3_MOUSE Canalicular multispecific organic anion transporter 2 OS=Mus musculus OX=10090 GN=Abcc3 PE=1 SV=1	97391080	93383710	82274560	98501320	73309290	93622710	77927750	120077600	91572750	93599990	116557100	108291300	89871080	103782900	112696200	125865600	91105610	96135530	109593200	97522590	98253970	131766300	114493200	118197200	66570560	82152340	145162000	145190000	189252800	59901100	108655700	127250100	225443600	106436400	128212200	87790610	125642200	114846000
B2RXC1	TPC11_MOUSE Trafficking protein particle complex subunit 11 OS=Mus musculus OX=10090 GN=Trappc11 PE=1 SV=1	Trappc11	sp|B2RXC1|TPC11_MOUSE Trafficking protein particle complex subunit 11 OS=Mus musculus OX=10090 GN=Trappc11 PE=1 SV=1	sp|B2RXC1|TPC11_MOUSE Trafficking protein particle complex subunit 11 OS=Mus musculus OX=10090 GN=Trappc11 PE=1 SV=1	51612990	41685740	53437090	38410650	41127920	30507820	52793610	48454670	35737800	62337690	52481530	79883350	49727610	35519630	47186430	37703580	58241250	44629400	42019900	62180530	35185510	65506760	60144750	32588930	47559840	71773040	74815730	61726690	41050590	44854880	50259550	74507830	62152620	60185500	71643290	55239470	55166190	44725150
B2RXS4	PLXB2_MOUSE Plexin-B2 OS=Mus musculus OX=10090 GN=Plxnb2 PE=1 SV=1	Plxnb2	sp|B2RXS4|PLXB2_MOUSE Plexin-B2 OS=Mus musculus OX=10090 GN=Plxnb2 PE=1 SV=1	sp|B2RXS4|PLXB2_MOUSE Plexin-B2 OS=Mus musculus OX=10090 GN=Plxnb2 PE=1 SV=1	48525960	72974010	68931920	67449990	42086390	50450960	60790390	67926740	58545530	54485920	85914650	115825600	73461090	95098720	49819090	74935100	83897490	60129230	88799990	65700590	80435540	104557200	101424900	110739800	48034350	47862730	102457500	136226700	128772200	51976090	84422620	105769600	225347500	53065880	73678950	72670260	94316860	68463970
B7ZMP1	XPP3_MOUSE Xaa-Pro aminopeptidase 3 OS=Mus musculus OX=10090 GN=Xpnpep3 PE=1 SV=1	Xpnpep3	sp|B7ZMP1|XPP3_MOUSE Xaa-Pro aminopeptidase 3 OS=Mus musculus OX=10090 GN=Xpnpep3 PE=1 SV=1	sp|B7ZMP1|XPP3_MOUSE Xaa-Pro aminopeptidase 3 OS=Mus musculus OX=10090 GN=Xpnpep3 PE=1 SV=1	7683525	4974869	3087557	2819094	9926641	4557565	4146216	4096833	2289221	9375726	5766647	5732608	3827698	1913138	8214954	3346380	4275258	3949749	2363988	9182838	5226434	7576896	3684763	2025005	9683312	6145808	7063524	6773593	3150218	4262809	4194868	5379920	2871144	7890305	4409043	5004375	5100514	4985586
B9EJ86	OSBL8_MOUSE Oxysterol-binding protein-related protein 8 OS=Mus musculus OX=10090 GN=Osbpl8 PE=1 SV=1	Osbpl8	sp|B9EJ86|OSBL8_MOUSE Oxysterol-binding protein-related protein 8 OS=Mus musculus OX=10090 GN=Osbpl8 PE=1 SV=1	sp|B9EJ86|OSBL8_MOUSE Oxysterol-binding protein-related protein 8 OS=Mus musculus OX=10090 GN=Osbpl8 PE=1 SV=1	4374498	8321704	12988680	10736530	5693223	6216292	11513270	11796460	9256959	4958542	6160752	7666360	9376302	7618138	3643995	5316572	9998320	8912134	8370170	10532240	8714200	16611990	11763990	10824650	5467529	4666995	18914860	9663397	13539240	3336254	8107045	13130760	16519110	6303061	4110832	11173460	8098371	11076170
C0HKE2	H2A1C_MOUSE Histone H2A type 1-C OS=Mus musculus OX=10090 GN=Hist1h2ac PE=1 SV=1	Hist1h2ac	sp|C0HKE2|H2A1C_MOUSE Histone H2A type 1-C OS=Mus musculus OX=10090 GN=Hist1h2ac PE=1 SV=1	sp|C0HKE2|H2A1C_MOUSE Histone H2A type 1-C OS=Mus musculus OX=10090 GN=Hist1h2ac PE=1 SV=1	356384600	119746400	269403800	57017680	187360200	117272900	174645300	144341600	191719900	195119800	166051400	196899600	238432300	54668260	101140600	96996880	194922400	70613450	151849300	268896100	49008930	192834600	94560120	53706660	32284960	79774050	130514500	125909800	134266800	67649870	46437940	158813600	99388120	37470500	86807290	81986360	91557970	55128530
C0HKE3	H2A1D_MOUSE Histone H2A type 1-D OS=Mus musculus OX=10090 GN=Hist1h2ad PE=1 SV=1	Hist1h2ad	sp|C0HKE3|H2A1D_MOUSE Histone H2A type 1-D OS=Mus musculus OX=10090 GN=Hist1h2ad PE=1 SV=1	sp|C0HKE3|H2A1D_MOUSE Histone H2A type 1-D OS=Mus musculus OX=10090 GN=Hist1h2ad PE=1 SV=1	356384600	119746400	269403800	57017680	187360200	117272900	174645300	144341600	191719900	195119800	166051400	196899600	238432300	54668260	101140600	96996880	194922400	70613450	151849300	268896100	49008930	192834600	94560120	53706660	32284960	79774050	130514500	125909800	134266800	67649870	46437940	158813600	99388120	37470500	86807290	81986360	91557970	55128530
C0HKE4	H2A1E_MOUSE Histone H2A type 1-E OS=Mus musculus OX=10090 GN=Hist1h2ae PE=1 SV=1	Hist1h2ae	sp|C0HKE4|H2A1E_MOUSE Histone H2A type 1-E OS=Mus musculus OX=10090 GN=Hist1h2ae PE=1 SV=1	sp|C0HKE4|H2A1E_MOUSE Histone H2A type 1-E OS=Mus musculus OX=10090 GN=Hist1h2ae PE=1 SV=1	356384600	119746400	269403800	57017680	187360200	117272900	174645300	144341600	191719900	195119800	166051400	196899600	238432300	54668260	101140600	96996880	194922400	70613450	151849300	268896100	49008930	192834600	94560120	53706660	32284960	79774050	130514500	125909800	134266800	67649870	46437940	158813600	99388120	37470500	86807290	81986360	91557970	55128530
C0HKE5	H2A1G_MOUSE Histone H2A type 1-G OS=Mus musculus OX=10090 GN=Hist1h2ag PE=1 SV=1	Hist1h2ag	sp|C0HKE5|H2A1G_MOUSE Histone H2A type 1-G OS=Mus musculus OX=10090 GN=Hist1h2ag PE=1 SV=1	sp|C0HKE5|H2A1G_MOUSE Histone H2A type 1-G OS=Mus musculus OX=10090 GN=Hist1h2ag PE=1 SV=1	356384600	119746400	269403800	57017680	187360200	117272900	174645300	144341600	191719900	195119800	166051400	196899600	238432300	54668260	101140600	96996880	194922400	70613450	151849300	268896100	49008930	192834600	94560120	53706660	32284960	79774050	130514500	125909800	134266800	67649870	46437940	158813600	99388120	37470500	86807290	81986360	91557970	55128530
C0HKE6	H2A1I_MOUSE Histone H2A type 1-I OS=Mus musculus OX=10090 GN=Hist1h2ai PE=1 SV=1	Hist1h2ai	sp|C0HKE6|H2A1I_MOUSE Histone H2A type 1-I OS=Mus musculus OX=10090 GN=Hist1h2ai PE=1 SV=1	sp|C0HKE6|H2A1I_MOUSE Histone H2A type 1-I OS=Mus musculus OX=10090 GN=Hist1h2ai PE=1 SV=1	356384600	119746400	269403800	57017680	187360200	117272900	174645300	144341600	191719900	195119800	166051400	196899600	238432300	54668260	101140600	96996880	194922400	70613450	151849300	268896100	49008930	192834600	94560120	53706660	32284960	79774050	130514500	125909800	134266800	67649870	46437940	158813600	99388120	37470500	86807290	81986360	91557970	55128530
C0HKE7	H2A1N_MOUSE Histone H2A type 1-N OS=Mus musculus OX=10090 GN=Hist1h2an PE=1 SV=1	Hist1h2an	sp|C0HKE7|H2A1N_MOUSE Histone H2A type 1-N OS=Mus musculus OX=10090 GN=Hist1h2an PE=1 SV=1	sp|C0HKE7|H2A1N_MOUSE Histone H2A type 1-N OS=Mus musculus OX=10090 GN=Hist1h2an PE=1 SV=1	356384600	119746400	269403800	57017680	187360200	117272900	174645300	144341600	191719900	195119800	166051400	196899600	238432300	54668260	101140600	96996880	194922400	70613450	151849300	268896100	49008930	192834600	94560120	53706660	32284960	79774050	130514500	125909800	134266800	67649870	46437940	158813600	99388120	37470500	86807290	81986360	91557970	55128530
C0HKE8	H2A1O_MOUSE Histone H2A type 1-O OS=Mus musculus OX=10090 GN=Hist1h2ao PE=1 SV=1	Hist1h2ao	sp|C0HKE8|H2A1O_MOUSE Histone H2A type 1-O OS=Mus musculus OX=10090 GN=Hist1h2ao PE=1 SV=1	sp|C0HKE8|H2A1O_MOUSE Histone H2A type 1-O OS=Mus musculus OX=10090 GN=Hist1h2ao PE=1 SV=1	356384600	119746400	269403800	57017680	187360200	117272900	174645300	144341600	191719900	195119800	166051400	196899600	238432300	54668260	101140600	96996880	194922400	70613450	151849300	268896100	49008930	192834600	94560120	53706660	32284960	79774050	130514500	125909800	134266800	67649870	46437940	158813600	99388120	37470500	86807290	81986360	91557970	55128530
C0HKE9	H2A1P_MOUSE Histone H2A type 1-P OS=Mus musculus OX=10090 GN=Hist1h2ap PE=1 SV=1	Hist1h2ap	sp|C0HKE9|H2A1P_MOUSE Histone H2A type 1-P OS=Mus musculus OX=10090 GN=Hist1h2ap PE=1 SV=1	sp|C0HKE9|H2A1P_MOUSE Histone H2A type 1-P OS=Mus musculus OX=10090 GN=Hist1h2ap PE=1 SV=1	356384600	119746400	269403800	57017680	187360200	117272900	174645300	144341600	191719900	195119800	166051400	196899600	238432300	54668260	101140600	96996880	194922400	70613450	151849300	268896100	49008930	192834600	94560120	53706660	32284960	79774050	130514500	125909800	134266800	67649870	46437940	158813600	99388120	37470500	86807290	81986360	91557970	55128530
C0HKG6	RNT2B_MOUSE Ribonuclease T2-B OS=Mus musculus OX=10090 GN=Rnaset2b PE=1 SV=1	Rnaset2b	sp|C0HKG6|RNT2B_MOUSE Ribonuclease T2-B OS=Mus musculus OX=10090 GN=Rnaset2b PE=1 SV=1	sp|C0HKG6|RNT2B_MOUSE Ribonuclease T2-B OS=Mus musculus OX=10090 GN=Rnaset2b PE=1 SV=1	10767020	11256480	15532800	23689350	11418140	13574740	12785690	18419840	9072021	14116930	10125830	28121810	17022890	18276730	12223870	9838556	21871140	8755910	11101330	24202840	26343730	40716670	39439040	20956820	38055390	33646170	47990860	31966000	30309570	18009170	21441910	33110350	33778900	32962940	33083530	36616620	38235480	30717900
D3Z6P0	PDIA2_MOUSE Protein disulfide-isomerase A2 OS=Mus musculus OX=10090 GN=Pdia2 PE=1 SV=1	Pdia2	sp|D3Z6P0|PDIA2_MOUSE Protein disulfide-isomerase A2 OS=Mus musculus OX=10090 GN=Pdia2 PE=1 SV=1	sp|D3Z6P0|PDIA2_MOUSE Protein disulfide-isomerase A2 OS=Mus musculus OX=10090 GN=Pdia2 PE=1 SV=1	6206751	7547926	14620580	14015830	5070146	14667660	8652686	10587330	18222630	137706100	39315000	19520310	7658813	15233400	12835330	10507320	11604650	12669160	7502887	7559014	23743590	14645630	15380580	17515340	7098619	5503394	9979741	19029420	23093700	7049222	39676830	73439080	5613130	43011070	6392949	23977360	12963250	18439840
D3Z7P3	GLSK_MOUSE Glutaminase kidney isoform, mitochondrial OS=Mus musculus OX=10090 GN=Gls PE=1 SV=1	Gls	sp|D3Z7P3|GLSK_MOUSE Glutaminase kidney isoform, mitochondrial OS=Mus musculus OX=10090 GN=Gls PE=1 SV=1	sp|D3Z7P3|GLSK_MOUSE Glutaminase kidney isoform, mitochondrial OS=Mus musculus OX=10090 GN=Gls PE=1 SV=1	71086570	35623520	45550490	26226840	80428740	32997590	26409120	29888810	18919240	68779210	46958460	34003990	34942470	19719640	53151830	24823640	27574880	20168880	16078780	86585500	42688090	27586080	38999300	14029380	64228510	54477660	53301150	47623590	19411910	44711450	39407870	22782860	41782510	54182620	47953620	34398320	45176640	25261080
E9PV24	FIBA_MOUSE Fibrinogen alpha chain OS=Mus musculus OX=10090 GN=Fga PE=1 SV=1	Fga	sp|E9PV24|FIBA_MOUSE Fibrinogen alpha chain OS=Mus musculus OX=10090 GN=Fga PE=1 SV=1	sp|E9PV24|FIBA_MOUSE Fibrinogen alpha chain OS=Mus musculus OX=10090 GN=Fga PE=1 SV=1	204831900	364023600	192485900	138025800	270657300	289971100	403484900	373480200	223027400	337525800	391756000	204072200	212170500	388557800	418158300	636827500	331578200	323809200	450606200	72083960	416102900	144712200	178451500	287394200	36797460	119088400	114743400	299710300	209301900	46606910	267790100	116927300	396111500	103795900	161607200	125664500	206283100	133020200
E9PVA8	GCN1_MOUSE eIF-2-alpha kinase activator GCN1 OS=Mus musculus OX=10090 GN=Gcn1 PE=1 SV=1	Gcn1	sp|E9PVA8|GCN1_MOUSE eIF-2-alpha kinase activator GCN1 OS=Mus musculus OX=10090 GN=Gcn1 PE=1 SV=1	sp|E9PVA8|GCN1_MOUSE eIF-2-alpha kinase activator GCN1 OS=Mus musculus OX=10090 GN=Gcn1 PE=1 SV=1	3123406	2557656	5149774	4088501	2547488	2771234	4155048	5984693	4603552	2834886	4109727	4494529	4238927	2177489	2302688	3034796	3929972	4272466	6842820	6285438	2441618	6746932	2713896	3624105	15480420	3437057	4409677	5508890	2866177	4872595	2773371	3404254	3875927	13950570	1807753	4145406	2601356	2156760
E9PYK3	PARP4_MOUSE Protein mono-ADP-ribosyltransferase PARP4 OS=Mus musculus OX=10090 GN=Parp4 PE=1 SV=1	Parp4	sp|E9PYK3|PARP4_MOUSE Protein mono-ADP-ribosyltransferase PARP4 OS=Mus musculus OX=10090 GN=Parp4 PE=1 SV=1	sp|E9PYK3|PARP4_MOUSE Protein mono-ADP-ribosyltransferase PARP4 OS=Mus musculus OX=10090 GN=Parp4 PE=1 SV=1	521198	1532933	1035506	1414616	196892	386447	1098946	1140766	3300494	2451920	419110	1428418	2457583	832715	1379149	877670	876980	1160322	652671	1705627	488219	1230542	977165	1656722	722254	512776	1049820	1151062	1387055	261874	338291	1248560	969955	638700	688872	1734451	1576091	1325628
E9PZJ8	ASCC3_MOUSE Activating signal cointegrator 1 complex subunit 3 OS=Mus musculus OX=10090 GN=Ascc3 PE=1 SV=1	Ascc3	sp|E9PZJ8|ASCC3_MOUSE Activating signal cointegrator 1 complex subunit 3 OS=Mus musculus OX=10090 GN=Ascc3 PE=1 SV=1	sp|E9PZJ8|ASCC3_MOUSE Activating signal cointegrator 1 complex subunit 3 OS=Mus musculus OX=10090 GN=Ascc3 PE=1 SV=1	384315	248740	617605	536166	499381	199883	361244	448478	383060	64624.3	363061	192292	551761	568074	419540	276316	385690	255544	637518	283783	384148	133267	330534	247760	47897.4	192390	631808	606184	649795	281697	58044.6	200832	470484	110262	237752	747917	80849.6	406561
E9Q3C1	C2CD2_MOUSE C2 domain-containing protein 2 OS=Mus musculus OX=10090 GN=C2cd2 PE=1 SV=1	C2cd2	sp|E9Q3C1|C2CD2_MOUSE C2 domain-containing protein 2 OS=Mus musculus OX=10090 GN=C2cd2 PE=1 SV=1	sp|E9Q3C1|C2CD2_MOUSE C2 domain-containing protein 2 OS=Mus musculus OX=10090 GN=C2cd2 PE=1 SV=1	8952353	2826808	5283287	5391220	6181879	5720750	4766162	6770092	5609156	8093251	6036763	7918389	4990976	2699928	7654492	3949732	4228222	4525587	7183981	2889144	2099302	7692971	6692549	3551374	4363403	6946330	8015941	5778652	6912253	3580948	6449584	5649870	8360452	4206745	6315904	4690919	9144515	4226421
E9Q3L2	PI4KA_MOUSE Phosphatidylinositol 4-kinase alpha OS=Mus musculus OX=10090 GN=Pi4ka PE=1 SV=2	Pi4ka	sp|E9Q3L2|PI4KA_MOUSE Phosphatidylinositol 4-kinase alpha OS=Mus musculus OX=10090 GN=Pi4ka PE=1 SV=2	sp|E9Q3L2|PI4KA_MOUSE Phosphatidylinositol 4-kinase alpha OS=Mus musculus OX=10090 GN=Pi4ka PE=1 SV=2	12969700	13456630	12545080	18135620	8239479	14450430	13049970	10758770	10883320	12440400	15376520	22855950	12454220	12380810	8912114	12631610	12528020	13363650	20327680	11292300	14688710	20119580	19676730	16486550	10564030	16622140	23995610	20896360	23723240	8736329	10497350	17664130	38151570	10744890	17542290	18692030	19833070	17980070
E9Q414	APOB_MOUSE Apolipoprotein B-100 OS=Mus musculus OX=10090 GN=Apob PE=1 SV=1	Apob	sp|E9Q414|APOB_MOUSE Apolipoprotein B-100 OS=Mus musculus OX=10090 GN=Apob PE=1 SV=1	sp|E9Q414|APOB_MOUSE Apolipoprotein B-100 OS=Mus musculus OX=10090 GN=Apob PE=1 SV=1	1130236000	833286800	1234255000	795418500	3127390000	2797627000	2634615000	3228110000	2194706000	2510726000	1614334000	589130100	951418600	545418200	2358184000	3179860000	1034464000	2821825000	3511103000	131856600	435365500	819391100	761164100	726763300	141040100	382065700	942626200	743424400	847907600	148585100	334973200	811378600	901830400	302809600	525982300	742558000	549475400	758198100
E9Q4Z2	ACACB_MOUSE Acetyl-CoA carboxylase 2 OS=Mus musculus OX=10090 GN=Acacb PE=1 SV=1	Acacb	sp|E9Q4Z2|ACACB_MOUSE Acetyl-CoA carboxylase 2 OS=Mus musculus OX=10090 GN=Acacb PE=1 SV=1	sp|E9Q4Z2|ACACB_MOUSE Acetyl-CoA carboxylase 2 OS=Mus musculus OX=10090 GN=Acacb PE=1 SV=1	38628540	26957330	24464430	21865900	36133650	25282170	42091840	30665260	33803420	29559940	47733780	29126020	23771030	17291870	21847260	21699040	25655310	18301430	52857410	10189690	35102660	28896710	26067940	20115780	16200270	33031550	26274860	21585390	26101620	13409850	15094280	24302960	26628800	10166750	26110650	25815890	22703380	17000070
E9Q555	RN213_MOUSE E3 ubiquitin-protein ligase RNF213 OS=Mus musculus OX=10090 GN=Rnf213 PE=1 SV=2	Rnf213	sp|E9Q555|RN213_MOUSE E3 ubiquitin-protein ligase RNF213 OS=Mus musculus OX=10090 GN=Rnf213 PE=1 SV=2	sp|E9Q555|RN213_MOUSE E3 ubiquitin-protein ligase RNF213 OS=Mus musculus OX=10090 GN=Rnf213 PE=1 SV=2	26229550	27988460	41661530	26336440	35650090	24981600	23341420	37409950	21793740	37501410	28864460	22882090	33688820	16817960	31027950	22202610	27633130	18337740	22115580	39235560	21108070	30802700	28784040	15784690	36734160	30315260	44763220	30662400	16659690	26979040	27098110	27051320	30854930	35718930	28634440	27992180	27101360	25990580
E9Q557	DESP_MOUSE Desmoplakin OS=Mus musculus OX=10090 GN=Dsp PE=1 SV=1	Dsp	sp|E9Q557|DESP_MOUSE Desmoplakin OS=Mus musculus OX=10090 GN=Dsp PE=1 SV=1	sp|E9Q557|DESP_MOUSE Desmoplakin OS=Mus musculus OX=10090 GN=Dsp PE=1 SV=1	9510739	1623932	4521137	2603567	2259325	1618562	2215668	2191214	2689053	4751839	3080253	3545433	3906955	1249982	2032065	1825904	3604640	2439694	2739280	8239533	3041234	3765679	1538591	1785526	3005903	2975839	2931231	2615854	1228312	3512433	2800352	2168101	1774983	1944199	2839983	1955459	1655599	1494698
E9Q634	MYO1E_MOUSE Unconventional myosin-Ie OS=Mus musculus OX=10090 GN=Myo1e PE=1 SV=1	Myo1e	sp|E9Q634|MYO1E_MOUSE Unconventional myosin-Ie OS=Mus musculus OX=10090 GN=Myo1e PE=1 SV=1	sp|E9Q634|MYO1E_MOUSE Unconventional myosin-Ie OS=Mus musculus OX=10090 GN=Myo1e PE=1 SV=1	2625075	1789608	3458361	1668341	2898151	1577428	2091002	3142011	2784556	2808022	2799615	2618046	1254149	1543137	1616161	1000543	2921473	1566201	2258278	400284	1392614	2296648	2248012	1357483	1692888	1815668	4226221	2020951	2336253	963264	1812496	1903435	2448670	1783344	1983597	2282317	913624	2517166
E9Q735	UBE4A_MOUSE Ubiquitin conjugation factor E4 A OS=Mus musculus OX=10090 GN=Ube4a PE=1 SV=1	Ube4a	sp|E9Q735|UBE4A_MOUSE Ubiquitin conjugation factor E4 A OS=Mus musculus OX=10090 GN=Ube4a PE=1 SV=1	sp|E9Q735|UBE4A_MOUSE Ubiquitin conjugation factor E4 A OS=Mus musculus OX=10090 GN=Ube4a PE=1 SV=1	537688	494676	1312469	588802	743101	277669	1048493	1221646	1247359	833636	612161	623688	379974	194211	537122	430456	764353	618596	1644336	99376.3	139759	305976	525581	92644.6	214705	139672	566411	111462	765339	128573	621774	346918	582065	200026	17954720	945571	407209	225843
E9QAM5	HELZ2_MOUSE Helicase with zinc finger domain 2 OS=Mus musculus OX=10090 GN=Helz2 PE=1 SV=1	Helz2	sp|E9QAM5|HELZ2_MOUSE Helicase with zinc finger domain 2 OS=Mus musculus OX=10090 GN=Helz2 PE=1 SV=1	sp|E9QAM5|HELZ2_MOUSE Helicase with zinc finger domain 2 OS=Mus musculus OX=10090 GN=Helz2 PE=1 SV=1	1337215	968669	2100487	1864569	791503	963459	1596814	1550944	1400442	960571	2133923	2749706	2223506	2365837	1128363	842920	2598033	2105669	1551675	982912	2036099	3482920	2314167	1908720	1471917	1651563	4843132	2123655	2679930	831380	2270273	2508574	4579420	1552390	1831003	2700503	1956830	2089304
E9QAT4	SC16A_MOUSE Protein transport protein Sec16A OS=Mus musculus OX=10090 GN=Sec16a PE=1 SV=1	Sec16a	sp|E9QAT4|SC16A_MOUSE Protein transport protein Sec16A OS=Mus musculus OX=10090 GN=Sec16a PE=1 SV=1	sp|E9QAT4|SC16A_MOUSE Protein transport protein Sec16A OS=Mus musculus OX=10090 GN=Sec16a PE=1 SV=1	743109	536932	636125	766425	550951	454556	662393	1353652	760299	943561	812836	718015	318506	609553	592974	657312	425678	564513	958697	461248	347676	970768	353984	337385	114149	794341	485448	878637	481614	469744	519665	893482	491215	309463	836980	452796	346264	358256
F8VPU2	FARP1_MOUSE FERM, ARHGEF and pleckstrin domain-containing protein 1 OS=Mus musculus OX=10090 GN=Farp1 PE=1 SV=1	Farp1	sp|F8VPU2|FARP1_MOUSE FERM, ARHGEF and pleckstrin domain-containing protein 1 OS=Mus musculus OX=10090 GN=Farp1 PE=1 SV=1	sp|F8VPU2|FARP1_MOUSE FERM, ARHGEF and pleckstrin domain-containing protein 1 OS=Mus musculus OX=10090 GN=Farp1 PE=1 SV=1	7763867	8329026	7058283	5845259	4296170	5145501	5073236	6647788	5903170	8687565	7767013	9910741	6052001	6062842	5714535	6426723	9055701	6012903	7705169	8784895	7024491	10619460	5852715	10168550	4320517	5957957	8476302	10080550	8782455	6393946	9518584	9592950	13619270	7412140	8186996	7731550	5273313	5373887
G3X982	AOXC_MOUSE Aldehyde oxidase 3 OS=Mus musculus OX=10090 GN=Aox3 PE=1 SV=1	Aox3	sp|G3X982|AOXC_MOUSE Aldehyde oxidase 3 OS=Mus musculus OX=10090 GN=Aox3 PE=1 SV=1	sp|G3X982|AOXC_MOUSE Aldehyde oxidase 3 OS=Mus musculus OX=10090 GN=Aox3 PE=1 SV=1	42745830	33005310	66846840	53927540	43890570	43524840	60803870	51326310	66802230	80563160	52644790	95132140	56639260	72455630	46541970	79110720	99245270	45601130	73381130	20154540	38680190	115972000	67001510	47579420	38542920	21737310	80032240	71976960	97541010	32399660	49094720	101805600	81680510	26045400	58979800	48704400	39007910	42259710
G5E829	AT2B1_MOUSE Plasma membrane calcium-transporting ATPase 1 OS=Mus musculus OX=10090 GN=Atp2b1 PE=1 SV=1	Atp2b1	sp|G5E829|AT2B1_MOUSE Plasma membrane calcium-transporting ATPase 1 OS=Mus musculus OX=10090 GN=Atp2b1 PE=1 SV=1	sp|G5E829|AT2B1_MOUSE Plasma membrane calcium-transporting ATPase 1 OS=Mus musculus OX=10090 GN=Atp2b1 PE=1 SV=1	9273001	12796910	15500310	12343010	7443130	9817439	11900430	12565440	9686236	11741870	15721250	18706630	10031180	15267700	8468377	12292550	17510440	10161640	11417570	15629730	14758770	20325600	11403450	14527100	6069322	10539650	26547760	19336350	16531340	7279676	13483090	18729650	26964970	12718960	12906780	14565620	13289130	17646720
G5E897	PLGT3_MOUSE Protein O-glucosyltransferase 3 OS=Mus musculus OX=10090 GN=Poglut3 PE=1 SV=1	Poglut3	sp|G5E897|PLGT3_MOUSE Protein O-glucosyltransferase 3 OS=Mus musculus OX=10090 GN=Poglut3 PE=1 SV=1	sp|G5E897|PLGT3_MOUSE Protein O-glucosyltransferase 3 OS=Mus musculus OX=10090 GN=Poglut3 PE=1 SV=1	1430045	1410342	4369497	3690367	1957440	2378908	2618785	3246604	3405488	916132	2087646	3378502	4564631	2660627	2304081	2993509	3300585	2978582	3603658	2050848	2340381	3493629	2989958	2580938	531472	890295	2639897	2449563	3679257	1590860	1301062	2799980	3631474	746813	2127885	2267110	2245005	2447447
G5E8K5	ANK3_MOUSE Ankyrin-3 OS=Mus musculus OX=10090 GN=Ank3 PE=1 SV=1	Ank3	sp|G5E8K5|ANK3_MOUSE Ankyrin-3 OS=Mus musculus OX=10090 GN=Ank3 PE=1 SV=1	sp|G5E8K5|ANK3_MOUSE Ankyrin-3 OS=Mus musculus OX=10090 GN=Ank3 PE=1 SV=1	2467140	6909074	6064186	1072364	2431332	1942824	5264612	3538371	1449016	1808863	4836293	8729934	2941506	2432015	1860183	8500357	7298780	3282829	2592867	4252726	10413230	6595630	5496166	2774083	1380476	2915231	5911563	4808997	3686487	2177350	6026035	3372939	7401210	2813546	2869253	5185935	4552569	3672444
O08528	HXK2_MOUSE Hexokinase-2 OS=Mus musculus OX=10090 GN=Hk2 PE=1 SV=1	Hk2	sp|O08528|HXK2_MOUSE Hexokinase-2 OS=Mus musculus OX=10090 GN=Hk2 PE=1 SV=1	sp|O08528|HXK2_MOUSE Hexokinase-2 OS=Mus musculus OX=10090 GN=Hk2 PE=1 SV=1	37307280	35365800	62517680	57487690	29735920	31554210	45313750	56079250	34160750	30693120	53597800	52837690	56172050	32337720	29116420	29219100	47386680	24739290	42120920	16414140	32877990	33110310	37694890	28484930	23125840	31632740	56496220	54933250	31070670	19828610	28683650	37172670	45505350	25966900	33084730	24760140	45864540	39383260
O08529	CAN2_MOUSE Calpain-2 catalytic subunit OS=Mus musculus OX=10090 GN=Capn2 PE=1 SV=4	Capn2	sp|O08529|CAN2_MOUSE Calpain-2 catalytic subunit OS=Mus musculus OX=10090 GN=Capn2 PE=1 SV=4	sp|O08529|CAN2_MOUSE Calpain-2 catalytic subunit OS=Mus musculus OX=10090 GN=Capn2 PE=1 SV=4	6012263	2481470	4792225	6563764	3882320	2290054	7108485	4056749	1599270	3372794	9368327	6074362	2713634	2945080	1233048	5595483	7348828	1671372	2655805	2306344	5544406	3569086	6520960	885618	3051720	2645096	7899285	3568780	3427857	2449749	2023711	4229002	5717937	2912880	2073182	2892499	1824325	2783557
O08547	SC22B_MOUSE Vesicle-trafficking protein SEC22b OS=Mus musculus OX=10090 GN=Sec22b PE=1 SV=3	Sec22b	sp|O08547|SC22B_MOUSE Vesicle-trafficking protein SEC22b OS=Mus musculus OX=10090 GN=Sec22b PE=1 SV=3	sp|O08547|SC22B_MOUSE Vesicle-trafficking protein SEC22b OS=Mus musculus OX=10090 GN=Sec22b PE=1 SV=3	28551400	55202060	60340070	45840180	24077580	37716790	58786370	65717760	52404950	33160040	52267320	39777020	40599570	27405100	31660990	44853890	63618320	42600770	55602800	11273610	24726230	34538190	28728280	38327280	8353249	12170250	39748210	26496340	24503380	13508320	24970740	32426280	50024970	21185250	15525860	29064620	15337040	23617930
O08553	DPYL2_MOUSE Dihydropyrimidinase-related protein 2 OS=Mus musculus OX=10090 GN=Dpysl2 PE=1 SV=2	Dpysl2	sp|O08553|DPYL2_MOUSE Dihydropyrimidinase-related protein 2 OS=Mus musculus OX=10090 GN=Dpysl2 PE=1 SV=2	sp|O08553|DPYL2_MOUSE Dihydropyrimidinase-related protein 2 OS=Mus musculus OX=10090 GN=Dpysl2 PE=1 SV=2	14146700	9839291	13427100	11210790	9589380	10488510	15730550	15914260	10788780	17699420	14160240	15226500	16134180	8392826	10500740	13797660	8970516	10156900	14492440	8106395	8982343	12263930	8659510	12675860	7951312	9056407	17601890	13921430	14223130	10059950	13119220	15201010	25267460	8475577	12539560	9432712	7643784	11274020
O08573	LEG9_MOUSE Galectin-9 OS=Mus musculus OX=10090 GN=Lgals9 PE=1 SV=1	Lgals9	sp|O08573|LEG9_MOUSE Galectin-9 OS=Mus musculus OX=10090 GN=Lgals9 PE=1 SV=1	sp|O08573|LEG9_MOUSE Galectin-9 OS=Mus musculus OX=10090 GN=Lgals9 PE=1 SV=1	593932300	490536100	333840200	360437100	875584200	652318700	690653300	961204400	839319500	925629800	876954300	728791300	318705400	189926400	560173400	547238100	505666400	626315200	825609600	264798500	361006600	420905500	363664100	464542600	227516400	286608900	192146800	102067200	315736500	280476800	344184100	296998000	586396500	216726800	273078100	212773300	303793400	47456560
O08579	EMD_MOUSE Emerin OS=Mus musculus OX=10090 GN=Emd PE=1 SV=1	Emd	sp|O08579|EMD_MOUSE Emerin OS=Mus musculus OX=10090 GN=Emd PE=1 SV=1	sp|O08579|EMD_MOUSE Emerin OS=Mus musculus OX=10090 GN=Emd PE=1 SV=1	697584	1996227	1346040	243902	902343	1533412	1350742	2001136	1256362	384714	1694710	432998	831980	192606	479175	1153755	1083173	1134992	1139751	57200.7	180606	53770.6	193227	487329	71331.5	192448	48652.8	50759.7	180608	185867	152923	78411.3	299497	122380	99637.4	318346	206147	158322
O08582	GTPB1_MOUSE GTP-binding protein 1 OS=Mus musculus OX=10090 GN=Gtpbp1 PE=1 SV=2	Gtpbp1	sp|O08582|GTPB1_MOUSE GTP-binding protein 1 OS=Mus musculus OX=10090 GN=Gtpbp1 PE=1 SV=2	sp|O08582|GTPB1_MOUSE GTP-binding protein 1 OS=Mus musculus OX=10090 GN=Gtpbp1 PE=1 SV=2	2863328	3281139	2008272	1544432	3879635	1999292	1409588	2380677	2830784	3182340	4329259	1398813	2297554	1092126	1720984	2543154	1636104	1620114	1761254	1240009	1520284	1806301	979368	1461222	631012	669475	1673638	2257108	1740068	881961	1550825	1303339	2629564	911638	803235	972821	849334	1256445
O08585	CLCA_MOUSE Clathrin light chain A OS=Mus musculus OX=10090 GN=Clta PE=1 SV=2	Clta	sp|O08585|CLCA_MOUSE Clathrin light chain A OS=Mus musculus OX=10090 GN=Clta PE=1 SV=2	sp|O08585|CLCA_MOUSE Clathrin light chain A OS=Mus musculus OX=10090 GN=Clta PE=1 SV=2	9446330	9315432	8146699	7014525	5719092	7666393	8491094	6423584	8919074	9746265	8413466	14131770	7155398	5210488	6960538	6252173	12157320	6687385	11468100	6548453	6911555	8333591	4897649	7458059	2822959	4654218	3829514	3290891	4641760	4516553	6206342	5936298	8763161	2820626	5116050	3136561	4268401	3199588
O08599	STXB1_MOUSE Syntaxin-binding protein 1 OS=Mus musculus OX=10090 GN=Stxbp1 PE=1 SV=2	Stxbp1	sp|O08599|STXB1_MOUSE Syntaxin-binding protein 1 OS=Mus musculus OX=10090 GN=Stxbp1 PE=1 SV=2	sp|O08599|STXB1_MOUSE Syntaxin-binding protein 1 OS=Mus musculus OX=10090 GN=Stxbp1 PE=1 SV=2	1087985	962897	1334556	803639	909109	645997	1029881	874812	857730	670188	677571	627182	907272	723496	435015	538224	865509	772349	709793	685994	557075	921555	828042	571137	701902	521214	764784	638056	560562	477984	740924	678738	1223397	556622	438565	525413	72827.9	618264
O08600	NUCG_MOUSE Endonuclease G, mitochondrial OS=Mus musculus OX=10090 GN=Endog PE=1 SV=1	Endog	sp|O08600|NUCG_MOUSE Endonuclease G, mitochondrial OS=Mus musculus OX=10090 GN=Endog PE=1 SV=1	sp|O08600|NUCG_MOUSE Endonuclease G, mitochondrial OS=Mus musculus OX=10090 GN=Endog PE=1 SV=1	119984300	80922030	53149380	30488240	107059900	62682090	55842510	79159110	38685590	103163700	75448030	68948950	57291160	18458680	56822450	55931300	57231940	49721060	39719150	43511460	37340020	73923580	40282580	27564500	29679560	44020340	52706270	48831730	27960480	31387590	43244040	47369410	38834500	30484150	39354210	38075080	44929010	20068000
O08601	MTP_MOUSE Microsomal triglyceride transfer protein large subunit OS=Mus musculus OX=10090 GN=Mttp PE=1 SV=2	Mttp	sp|O08601|MTP_MOUSE Microsomal triglyceride transfer protein large subunit OS=Mus musculus OX=10090 GN=Mttp PE=1 SV=2	sp|O08601|MTP_MOUSE Microsomal triglyceride transfer protein large subunit OS=Mus musculus OX=10090 GN=Mttp PE=1 SV=2	1125054000	1951712000	2876114000	2851932000	1208577000	1927376000	2710505000	3521086000	2956043000	1098290000	2236836000	2958634000	2313047000	2442409000	1650480000	1937122000	2801149000	2702185000	3060310000	813380200	2614255000	3529416000	4240347000	3203163000	1272638000	2862297000	5701875000	4413848000	4338795000	1103706000	1697265000	3277178000	4628869000	2467958000	3053651000	4292454000	3068277000	4079941000
O08638	MYH11_MOUSE Myosin-11 OS=Mus musculus OX=10090 GN=Myh11 PE=1 SV=1	Myh11	sp|O08638|MYH11_MOUSE Myosin-11 OS=Mus musculus OX=10090 GN=Myh11 PE=1 SV=1	sp|O08638|MYH11_MOUSE Myosin-11 OS=Mus musculus OX=10090 GN=Myh11 PE=1 SV=1	520187400	468264500	308606900	424418500	394145300	507269000	516703700	605321700	203588400	230082800	578063200	447904100	449698700	288644600	120540200	596816400	481179600	99658240	210219900	25263390	393541700	335487800	257507800	258530500	138486400	167535800	254006200	253430700	300116000	260731800	300147700	262373300	52542300	182173300	200226800	239065100	53493620	226274300
O08663	MAP2_MOUSE Methionine aminopeptidase 2 OS=Mus musculus OX=10090 GN=Metap2 PE=1 SV=1	Metap2	sp|O08663|MAP2_MOUSE Methionine aminopeptidase 2 OS=Mus musculus OX=10090 GN=Metap2 PE=1 SV=1	sp|O08663|MAP2_MOUSE Methionine aminopeptidase 2 OS=Mus musculus OX=10090 GN=Metap2 PE=1 SV=1	623098	1001415	1830611	1312557	490711	1012452	1457716	1598085	1344592	487232	1043858	1809839	1159456	1587327	467489	581002	2412942	608572	1194230	519592	1079873	2689233	1566764	1721226	196345	506707	3319913	2614151	2572148	385826	926269	1627254	1879815	509716	915186	2086894	821768	1491865
O08677	KNG1_MOUSE Kininogen-1 OS=Mus musculus OX=10090 GN=Kng1 PE=1 SV=1	Kng1	sp|O08677|KNG1_MOUSE Kininogen-1 OS=Mus musculus OX=10090 GN=Kng1 PE=1 SV=1	sp|O08677|KNG1_MOUSE Kininogen-1 OS=Mus musculus OX=10090 GN=Kng1 PE=1 SV=1	22942660	61763570	27482570	20685100	30084710	38517330	58816450	49539820	41612570	26941300	75492520	42603670	43510510	31336830	24805630	66555730	42043760	38638810	47930200	5480661	37013760	18693570	24525450	37196150	3929644	9934710	10500230	20113310	18438990	6500729	30731560	19269550	56986890	7319380	18777970	10707520	25699520	14339300
O08691	ARGI2_MOUSE Arginase-2, mitochondrial OS=Mus musculus OX=10090 GN=Arg2 PE=1 SV=1	Arg2	sp|O08691|ARGI2_MOUSE Arginase-2, mitochondrial OS=Mus musculus OX=10090 GN=Arg2 PE=1 SV=1	sp|O08691|ARGI2_MOUSE Arginase-2, mitochondrial OS=Mus musculus OX=10090 GN=Arg2 PE=1 SV=1	634116	114443	93573.9	206862	202295	298834	390647	243528	173496	682815	101691	637005	257976	149994	425300	265210	296085	38173.9	34070.2	40643370	271968	372078	192736	54766.9	226638	369994	267583	222908	367328	191181	363023	450878	682226	346158	186940	244786	259944	225280
O08692	NGP_MOUSE Neutrophilic granule protein OS=Mus musculus OX=10090 GN=Ngp PE=1 SV=1	Ngp	sp|O08692|NGP_MOUSE Neutrophilic granule protein OS=Mus musculus OX=10090 GN=Ngp PE=1 SV=1	sp|O08692|NGP_MOUSE Neutrophilic granule protein OS=Mus musculus OX=10090 GN=Ngp PE=1 SV=1	104682200	87083840	41511860	28635920	31930390	46222820	19653130	19260710	21246070	51228180	54321050	60951260	50501390	40987090	47956200	68646650	89462410	15354520	69680010	9062534	14446330	4074184	8578524	25593750	1594217	4690358	2619473	22903930	4330747	2900554	16739300	4733572	7833971	8629878	3686147	3107862	5053312	4488079
O08705	NTCP_MOUSE Sodium/bile acid cotransporter OS=Mus musculus OX=10090 GN=Slc10a1 PE=1 SV=1	Slc10a1	sp|O08705|NTCP_MOUSE Sodium/bile acid cotransporter OS=Mus musculus OX=10090 GN=Slc10a1 PE=1 SV=1	sp|O08705|NTCP_MOUSE Sodium/bile acid cotransporter OS=Mus musculus OX=10090 GN=Slc10a1 PE=1 SV=1	48255470	117558800	45886910	43711380	63821000	68288000	64279090	70976220	52606950	47767280	126212400	117088100	43439100	81074810	72439800	74647360	71340450	74221570	92163930	30525980	102666500	86767840	76128200	96520410	53687090	85405370	43040590	66495470	80358830	43518770	92897440	69418850	184471100	50248740	61859870	60157690	80894930	31634760
O08709	PRDX6_MOUSE Peroxiredoxin-6 OS=Mus musculus OX=10090 GN=Prdx6 PE=1 SV=3	Prdx6	sp|O08709|PRDX6_MOUSE Peroxiredoxin-6 OS=Mus musculus OX=10090 GN=Prdx6 PE=1 SV=3	sp|O08709|PRDX6_MOUSE Peroxiredoxin-6 OS=Mus musculus OX=10090 GN=Prdx6 PE=1 SV=3	735154800	669540800	542616800	460225400	622141300	619687100	698959300	783660300	906297200	811574600	874836600	1212810000	744510800	291236500	619395900	833802900	698848800	514464300	926793200	342610400	470200600	717685500	476148000	506113000	354867300	309694400	220774200	436967900	483554400	380927200	518342400	539979200	711213900	212603300	470984900	259510500	411385700	156262000
O08715	AKAP1_MOUSE A-kinase anchor protein 1, mitochondrial OS=Mus musculus OX=10090 GN=Akap1 PE=1 SV=4	Akap1	sp|O08715|AKAP1_MOUSE A-kinase anchor protein 1, mitochondrial OS=Mus musculus OX=10090 GN=Akap1 PE=1 SV=4	sp|O08715|AKAP1_MOUSE A-kinase anchor protein 1, mitochondrial OS=Mus musculus OX=10090 GN=Akap1 PE=1 SV=4	9115694	12502430	4972717	2534148	8509845	6620996	7490055	7825202	10057530	9748897	14220910	4088075	6454089	1789974	10537130	11551130	4953873	6943508	9097856	2022623	6757815	8771758	3413638	3933196	2052729	2687414	6022411	3186109	5130631	1236782	3412558	3759838	4894746	3101331	3887046	3440885	3714497	2425591
O08734	BAK_MOUSE Bcl-2 homologous antagonist/killer OS=Mus musculus OX=10090 GN=Bak1 PE=1 SV=3	Bak1	sp|O08734|BAK_MOUSE Bcl-2 homologous antagonist/killer OS=Mus musculus OX=10090 GN=Bak1 PE=1 SV=3	sp|O08734|BAK_MOUSE Bcl-2 homologous antagonist/killer OS=Mus musculus OX=10090 GN=Bak1 PE=1 SV=3	20801140	13515470	64816710	35812070	13890060	15735510	13902840	24473940	14930530	17691830	20477970	18913530	37100340	21541260	17158330	11967500	18637070	11157270	13478870	20578920	19432380	23694740	22843580	13714260	30054500	19539550	61851930	53612630	18069420	23370790	22853720	33970850	21939350	31383660	25628140	35558690	28244780	48254300
O08738	CASP6_MOUSE Caspase-6 OS=Mus musculus OX=10090 GN=Casp6 PE=1 SV=1	Casp6	sp|O08738|CASP6_MOUSE Caspase-6 OS=Mus musculus OX=10090 GN=Casp6 PE=1 SV=1	sp|O08738|CASP6_MOUSE Caspase-6 OS=Mus musculus OX=10090 GN=Casp6 PE=1 SV=1	875079	949468	1455793	1325908	352903	1304897	684131	894071	1669376	325941	1094597	1260210	1766498	787542	909731	1153588	704800	1254037	2167287	263779	722400	2102199	1295841	1071514	300514	146605	946884	1074725	1169178	373693	208146	1484905	1774778	110182	851223	1125171	1034113	503864
O08749	DLDH_MOUSE Dihydrolipoyl dehydrogenase, mitochondrial OS=Mus musculus OX=10090 GN=Dld PE=1 SV=2	Dld	sp|O08749|DLDH_MOUSE Dihydrolipoyl dehydrogenase, mitochondrial OS=Mus musculus OX=10090 GN=Dld PE=1 SV=2	sp|O08749|DLDH_MOUSE Dihydrolipoyl dehydrogenase, mitochondrial OS=Mus musculus OX=10090 GN=Dld PE=1 SV=2	1059595000	619970200	542421400	364712500	1110723000	579222000	472653000	588871400	379692900	1306547000	779234800	619106300	504100900	246947100	907757100	519195700	523072800	404291100	294286900	1504020000	535435700	493264600	437160800	234249400	767715800	622760500	493551700	499276800	263863900	682375600	674700600	463896300	449201300	694008600	657906000	387603300	528004000	301091000
O08756	HCD2_MOUSE 3-hydroxyacyl-CoA dehydrogenase type-2 OS=Mus musculus OX=10090 GN=Hsd17b10 PE=1 SV=4	Hsd17b10	sp|O08756|HCD2_MOUSE 3-hydroxyacyl-CoA dehydrogenase type-2 OS=Mus musculus OX=10090 GN=Hsd17b10 PE=1 SV=4	sp|O08756|HCD2_MOUSE 3-hydroxyacyl-CoA dehydrogenase type-2 OS=Mus musculus OX=10090 GN=Hsd17b10 PE=1 SV=4	1629378000	956788400	542221400	370229400	1654207000	874792400	591989600	961514700	489850400	1717726000	1033483000	666950800	697557900	166245500	1323213000	722951100	543514800	632885100	448737000	902809200	461197600	828965000	266945800	197165700	282754400	525075200	241099600	209028600	134289800	820527300	541433700	296998000	261798300	414213900	371792900	223762700	335289700	132257700
O08788	DCTN1_MOUSE Dynactin subunit 1 OS=Mus musculus OX=10090 GN=Dctn1 PE=1 SV=3	Dctn1	sp|O08788|DCTN1_MOUSE Dynactin subunit 1 OS=Mus musculus OX=10090 GN=Dctn1 PE=1 SV=3	sp|O08788|DCTN1_MOUSE Dynactin subunit 1 OS=Mus musculus OX=10090 GN=Dctn1 PE=1 SV=3	11962820	5948630	6197674	1126387	12542650	7890738	2796776	4256126	1570189	15245320	3484504	8179475	1502025	4749456	6697481	4152125	10402680	1018464	357091	12007050	10994400	10897530	6362195	5816743	11238260	9179169	17341460	7566579	4714754	8562160	5292902	8492185	9084461	13445010	7572779	6616519	2487835	2932087
O08795	GLU2B_MOUSE Glucosidase 2 subunit beta OS=Mus musculus OX=10090 GN=Prkcsh PE=1 SV=1	Prkcsh	sp|O08795|GLU2B_MOUSE Glucosidase 2 subunit beta OS=Mus musculus OX=10090 GN=Prkcsh PE=1 SV=1	sp|O08795|GLU2B_MOUSE Glucosidase 2 subunit beta OS=Mus musculus OX=10090 GN=Prkcsh PE=1 SV=1	130954600	295737400	293254100	185155300	160242500	273973100	400574300	361758900	285510300	135794500	296275600	390082900	244338500	193146000	179043800	255946800	362639400	255792900	272536600	83016180	189210400	284682000	274363200	221982700	68298500	152000100	320550600	256561900	252977500	63340920	167877200	250816400	307270700	130173000	224874500	215403600	225895500	235002700
O08800	SPB8_MOUSE Serpin B8 OS=Mus musculus OX=10090 GN=Serpinb8 PE=1 SV=2	Serpinb8	sp|O08800|SPB8_MOUSE Serpin B8 OS=Mus musculus OX=10090 GN=Serpinb8 PE=1 SV=2	sp|O08800|SPB8_MOUSE Serpin B8 OS=Mus musculus OX=10090 GN=Serpinb8 PE=1 SV=2	972826	995111	383553	676522	1018983	1021144	466167	820216	238195	1047406	201002	201868	435781	869822	772390	1302870	1024777	671525	583452	718910	1268341	257378	974133	1221832	1061183	40908.6	820064	804977	610645	709245	1256880	995795	613280	1066297	775629	849783	1061303	672488
O08807	PRDX4_MOUSE Peroxiredoxin-4 OS=Mus musculus OX=10090 GN=Prdx4 PE=1 SV=1	Prdx4	sp|O08807|PRDX4_MOUSE Peroxiredoxin-4 OS=Mus musculus OX=10090 GN=Prdx4 PE=1 SV=1	sp|O08807|PRDX4_MOUSE Peroxiredoxin-4 OS=Mus musculus OX=10090 GN=Prdx4 PE=1 SV=1	82621360	125049000	215549800	150845600	104578800	169347500	243500200	216279900	196786300	97236160	156220100	268364600	159315500	175344300	109471900	134444200	292082500	171067600	175148800	60401710	162768600	268084800	276295500	182668800	80001580	165762800	516356600	325362300	274734600	78288370	143000100	287852100	378026500	199614000	255151600	334429400	189704300	299072600
O08808	DIAP1_MOUSE Protein diaphanous homolog 1 OS=Mus musculus OX=10090 GN=Diaph1 PE=1 SV=1	Diaph1	sp|O08808|DIAP1_MOUSE Protein diaphanous homolog 1 OS=Mus musculus OX=10090 GN=Diaph1 PE=1 SV=1	sp|O08808|DIAP1_MOUSE Protein diaphanous homolog 1 OS=Mus musculus OX=10090 GN=Diaph1 PE=1 SV=1	625262	839453	1024823	877718	1763394	741400	1382331	1232997	732309	992952	783073	1174628	821411	689636	425572	144165	1639164	388331	1064894	153580	499032	766987	640060	406148	489377	458967	1355427	1401442	1248351	375078	311741	859976	1290355	420773	500447	934429	739100	729395
O08832	GALT4_MOUSE Polypeptide N-acetylgalactosaminyltransferase 4 OS=Mus musculus OX=10090 GN=Galnt4 PE=1 SV=1	Galnt4	sp|O08832|GALT4_MOUSE Polypeptide N-acetylgalactosaminyltransferase 4 OS=Mus musculus OX=10090 GN=Galnt4 PE=1 SV=1	sp|O08832|GALT4_MOUSE Polypeptide N-acetylgalactosaminyltransferase 4 OS=Mus musculus OX=10090 GN=Galnt4 PE=1 SV=1	923378	3048934	1780851	1508595	1881892	973241	2645718	951209	1637328	398660	1707255	3338633	2779980	1430827	685665	2261263	2415723	1902589	793841	1313194	1398953	2181859	2068628	694895	629826	1548791	2033362	2706612	1835883	895308	1125390	2568770	2667662	1331517	1701624	2437434	2157409	2081309
O08912	GALT1_MOUSE Polypeptide N-acetylgalactosaminyltransferase 1 OS=Mus musculus OX=10090 GN=Galnt1 PE=1 SV=1	Galnt1	sp|O08912|GALT1_MOUSE Polypeptide N-acetylgalactosaminyltransferase 1 OS=Mus musculus OX=10090 GN=Galnt1 PE=1 SV=1	sp|O08912|GALT1_MOUSE Polypeptide N-acetylgalactosaminyltransferase 1 OS=Mus musculus OX=10090 GN=Galnt1 PE=1 SV=1	989619	2283450	5815856	4637848	1233994	1697517	4487158	7736968	2477678	473444	2454986	3799127	5217782	5248475	1652243	3486582	5339099	3412154	3235949	1276167	2540860	8934285	6645197	5729355	1381221	3467680	21390140	10761360	7625092	1223150	2109508	10416270	10824170	3538709	4706184	14457270	6468732	13233120
O08914	FAAH1_MOUSE Fatty-acid amide hydrolase 1 OS=Mus musculus OX=10090 GN=Faah PE=1 SV=1	Faah	sp|O08914|FAAH1_MOUSE Fatty-acid amide hydrolase 1 OS=Mus musculus OX=10090 GN=Faah PE=1 SV=1	sp|O08914|FAAH1_MOUSE Fatty-acid amide hydrolase 1 OS=Mus musculus OX=10090 GN=Faah PE=1 SV=1	159850600	177395800	262740500	210335800	150463800	173246200	217237100	267196800	209097900	142090500	224478300	274312000	203594700	179664100	166597800	152297400	253488500	199236900	199362100	118592300	248331600	332779600	407475700	238217700	191714000	246301000	571712100	368152400	346585300	124154600	176734400	261796600	435572100	246010700	298404200	387499500	295236500	277528700
O08917	FLOT1_MOUSE Flotillin-1 OS=Mus musculus OX=10090 GN=Flot1 PE=1 SV=1	Flot1	sp|O08917|FLOT1_MOUSE Flotillin-1 OS=Mus musculus OX=10090 GN=Flot1 PE=1 SV=1	sp|O08917|FLOT1_MOUSE Flotillin-1 OS=Mus musculus OX=10090 GN=Flot1 PE=1 SV=1	35393420	29803190	34292690	26240810	29614390	28474230	31174070	28985870	23702150	32727550	41412160	51759910	25829470	28890110	26712670	29430760	34901020	22691970	27159290	33539090	40984570	47016080	45582460	32237570	26578620	29819980	39691250	52299580	41357140	23445240	36340740	36752600	80791170	36827490	45538190	34110680	43703310	29892520
O08966	S22A1_MOUSE Solute carrier family 22 member 1 OS=Mus musculus OX=10090 GN=Slc22a1 PE=1 SV=2	Slc22a1	sp|O08966|S22A1_MOUSE Solute carrier family 22 member 1 OS=Mus musculus OX=10090 GN=Slc22a1 PE=1 SV=2	sp|O08966|S22A1_MOUSE Solute carrier family 22 member 1 OS=Mus musculus OX=10090 GN=Slc22a1 PE=1 SV=2	52459640	61650630	67921220	61879100	47089650	45288230	64008020	70222080	53051200	65450610	68187980	73800960	65009070	69906680	64247830	74577890	82094900	73477710	72322500	65111150	77466830	92031160	58866590	74793140	47360520	57170450	97384450	89952820	124125100	28486370	73157000	101272000	149659100	52940470	61046230	68641600	78119130	72600800
O08997	ATOX1_MOUSE Copper transport protein ATOX1 OS=Mus musculus OX=10090 GN=Atox1 PE=1 SV=1	Atox1	sp|O08997|ATOX1_MOUSE Copper transport protein ATOX1 OS=Mus musculus OX=10090 GN=Atox1 PE=1 SV=1	sp|O08997|ATOX1_MOUSE Copper transport protein ATOX1 OS=Mus musculus OX=10090 GN=Atox1 PE=1 SV=1	3390591	2962805	1422699	2623903	2922500	2556620	2422828	2542654	3177968	2895505	4571237	2459937	4050843	979900	2917889	3307125	2960197	1652312	3151809	1179745	773522	349702	294958	1481347	617846	165077	554832	621006	502300	586010	1143587	751058	616818	815071	1263518	532925	602258	355204
O09005	DEGS1_MOUSE Sphingolipid delta(4)-desaturase DES1 OS=Mus musculus OX=10090 GN=Degs1 PE=1 SV=1	Degs1	sp|O09005|DEGS1_MOUSE Sphingolipid delta(4)-desaturase DES1 OS=Mus musculus OX=10090 GN=Degs1 PE=1 SV=1	sp|O09005|DEGS1_MOUSE Sphingolipid delta(4)-desaturase DES1 OS=Mus musculus OX=10090 GN=Degs1 PE=1 SV=1	810446	892978	1778274	1380864	377331	807717	954188	1135231	1029481	539407	875771	1656875	1149869	1101418	429630	741370	1367367	864026	731786	310075	570288	1084356	984990	1002338	267862	629988	2601733	1588882	1378429	309134	748039	1408613	1942003	646334	1094674	1462371	1381230	1476926
O09012	PEX5_MOUSE Peroxisomal targeting signal 1 receptor OS=Mus musculus OX=10090 GN=Pex5 PE=1 SV=2	Pex5	sp|O09012|PEX5_MOUSE Peroxisomal targeting signal 1 receptor OS=Mus musculus OX=10090 GN=Pex5 PE=1 SV=2	sp|O09012|PEX5_MOUSE Peroxisomal targeting signal 1 receptor OS=Mus musculus OX=10090 GN=Pex5 PE=1 SV=2	139361300	132455300	163586700	165966400	118954600	96150310	155237300	182382200	142007200	156308700	165075200	188861800	149877800	135585300	139039400	162382700	182410300	125265800	158514000	114610900	151574100	201487400	190629200	171864300	150545800	136192300	200651100	178315900	201914400	119993300	134559100	192187300	264983400	158050000	205696400	171034100	188641300	130578400
O09043	NAPSA_MOUSE Napsin-A OS=Mus musculus OX=10090 GN=Napsa PE=1 SV=1	Napsa	sp|O09043|NAPSA_MOUSE Napsin-A OS=Mus musculus OX=10090 GN=Napsa PE=1 SV=1	sp|O09043|NAPSA_MOUSE Napsin-A OS=Mus musculus OX=10090 GN=Napsa PE=1 SV=1	73285550	33736570	60816760	75684320	62609390	45242760	30973360	47029820	34990490	55345400	44826320	54862720	56307040	66895080	57030650	30893300	46075070	44541870	39804200	604303000	118024700	95146870	175425200	81186160	146963500	154007200	166165600	132759300	126865600	76878370	61323880	85220650	165121600	145953700	174590900	148459500	179697600	121183500
O09044	SNP23_MOUSE Synaptosomal-associated protein 23 OS=Mus musculus OX=10090 GN=Snap23 PE=1 SV=1	Snap23	sp|O09044|SNP23_MOUSE Synaptosomal-associated protein 23 OS=Mus musculus OX=10090 GN=Snap23 PE=1 SV=1	sp|O09044|SNP23_MOUSE Synaptosomal-associated protein 23 OS=Mus musculus OX=10090 GN=Snap23 PE=1 SV=1	24859760	38959970	44265000	30183410	25600190	28356050	38341680	41025000	28829520	26769190	40325380	61456730	32975030	41129320	26002250	34650960	55766720	29895670	39951440	29555080	34040450	47003490	38564220	40140770	19508620	24778090	57486050	49150440	47595410	19118360	37221930	54932520	80414170	28294010	34003990	37951160	37168590	41421070
O09061	PSB1_MOUSE Proteasome subunit beta type-1 OS=Mus musculus OX=10090 GN=Psmb1 PE=1 SV=1	Psmb1	sp|O09061|PSB1_MOUSE Proteasome subunit beta type-1 OS=Mus musculus OX=10090 GN=Psmb1 PE=1 SV=1	sp|O09061|PSB1_MOUSE Proteasome subunit beta type-1 OS=Mus musculus OX=10090 GN=Psmb1 PE=1 SV=1	19813480	27826890	32383270	20526300	20582720	26532060	28907270	32933670	40309440	22713350	36614850	46778040	30971280	18222570	17653180	34184200	44180610	19288280	44992640	9189273	10623350	30916610	14325090	16962670	6002105	5414171	10255970	19461610	21527090	9299255	19759370	21573330	23170700	5728638	8800370	9140168	14200640	6270253
O09111	NDUBB_MOUSE NADH dehydrogenase [ubiquinone] 1 beta subcomplex subunit 11, mitochondrial OS=Mus musculus OX=10090 GN=Ndufb11 PE=1 SV=2	Ndufb11	sp|O09111|NDUBB_MOUSE NADH dehydrogenase [ubiquinone] 1 beta subcomplex subunit 11, mitochondrial OS=Mus musculus OX=10090 GN=Ndufb11 PE=1 SV=2	sp|O09111|NDUBB_MOUSE NADH dehydrogenase [ubiquinone] 1 beta subcomplex subunit 11, mitochondrial OS=Mus musculus OX=10090 GN=Ndufb11 PE=1 SV=2	107574300	108600600	116387000	64382780	117255900	89174000	65299730	95384310	39961800	93643160	100671600	58928990	70460800	47427180	104745200	65935520	82631880	74482640	51655110	206468900	89619120	85980520	91037820	48036880	149579900	102928400	134650400	105398600	52557990	107468600	105332600	89751660	93041370	157573100	82125100	86984080	94965580	71307640
O09117	SYPL1_MOUSE Synaptophysin-like protein 1 OS=Mus musculus OX=10090 GN=Sypl1 PE=1 SV=2	Sypl1	sp|O09117|SYPL1_MOUSE Synaptophysin-like protein 1 OS=Mus musculus OX=10090 GN=Sypl1 PE=1 SV=2	sp|O09117|SYPL1_MOUSE Synaptophysin-like protein 1 OS=Mus musculus OX=10090 GN=Sypl1 PE=1 SV=2	7183500	7389851	6601832	4778139	6896311	5928430	6307824	6017057	4443275	9702617	9203904	7660327	4088762	5119472	6824513	6624261	7448722	4582609	4655720	18889580	9020185	12917020	11718410	4159498	4144619	5748997	11551670	7527410	8665721	4264228	5637112	6691535	16285360	5541290	9910284	10733150	9481920	5359898
O09131	GSTO1_MOUSE Glutathione S-transferase omega-1 OS=Mus musculus OX=10090 GN=Gsto1 PE=1 SV=2	Gsto1	sp|O09131|GSTO1_MOUSE Glutathione S-transferase omega-1 OS=Mus musculus OX=10090 GN=Gsto1 PE=1 SV=2	sp|O09131|GSTO1_MOUSE Glutathione S-transferase omega-1 OS=Mus musculus OX=10090 GN=Gsto1 PE=1 SV=2	12133080	8918144	5532779	3887673	9686544	9310759	9083284	11050870	15853120	17284810	17758850	9804114	10326090	1215129	9424895	13907150	9923296	7234116	14305620	1537978	2494205	3771638	3935741	3341801	1414759	1374315	1200776	2762121	2439000	1258935	3358774	1595601	4474185	1129834	1713471	2136634	2078018	1168890
O09158	CP3AP_MOUSE Cytochrome P450 3A25 OS=Mus musculus OX=10090 GN=Cyp3a25 PE=1 SV=1	Cyp3a25	sp|O09158|CP3AP_MOUSE Cytochrome P450 3A25 OS=Mus musculus OX=10090 GN=Cyp3a25 PE=1 SV=1	sp|O09158|CP3AP_MOUSE Cytochrome P450 3A25 OS=Mus musculus OX=10090 GN=Cyp3a25 PE=1 SV=1	38263920	86443770	79645320	122273100	37214450	97340410	70882690	185046400	103590700	45585510	94991550	124691200	62186340	53614810	56552950	80467250	93120680	99735960	121871000	28096840	56842170	168359400	190096700	159715600	45627320	120434600	168662400	150958200	158981800	44364310	59765380	111063700	219463300	82191580	103224000	111760000	161902100	98691530
O09159	MA2B1_MOUSE Lysosomal alpha-mannosidase OS=Mus musculus OX=10090 GN=Man2b1 PE=1 SV=4	Man2b1	sp|O09159|MA2B1_MOUSE Lysosomal alpha-mannosidase OS=Mus musculus OX=10090 GN=Man2b1 PE=1 SV=4	sp|O09159|MA2B1_MOUSE Lysosomal alpha-mannosidase OS=Mus musculus OX=10090 GN=Man2b1 PE=1 SV=4	64430790	70782130	125783800	171017600	83748300	80190220	91487020	114903000	52808800	80372680	76875500	209176900	94930660	170242700	98316880	77716110	182226900	70869530	63530090	239549600	434524100	270923100	412239400	214497300	505100400	476085300	517156600	401692100	398467000	258664000	218645600	284271600	417660000	515079200	463552100	409207200	441413900	344248400
O09164	SODE_MOUSE Extracellular superoxide dismutase [Cu-Zn] OS=Mus musculus OX=10090 GN=Sod3 PE=1 SV=1	Sod3	sp|O09164|SODE_MOUSE Extracellular superoxide dismutase [Cu-Zn] OS=Mus musculus OX=10090 GN=Sod3 PE=1 SV=1	sp|O09164|SODE_MOUSE Extracellular superoxide dismutase [Cu-Zn] OS=Mus musculus OX=10090 GN=Sod3 PE=1 SV=1	4186761	6112691	6887609	4757540	5743798	5774244	7086206	7150011	6164853	5565722	8457830	4020632	6820662	4830291	2708381	10462310	6269606	5231273	10828240	1349765	2736992	1949528	2744449	6553668	869570	471742	2895085	4099586	4577294	1059561	3906453	3299748	8485698	1517449	3025335	1543269	3929514	3705747
O09167	RL21_MOUSE 60S ribosomal protein L21 OS=Mus musculus OX=10090 GN=Rpl21 PE=1 SV=3	Rpl21	sp|O09167|RL21_MOUSE 60S ribosomal protein L21 OS=Mus musculus OX=10090 GN=Rpl21 PE=1 SV=3	sp|O09167|RL21_MOUSE 60S ribosomal protein L21 OS=Mus musculus OX=10090 GN=Rpl21 PE=1 SV=3	28662650	94424000	158340700	157749000	30165520	73338760	129281700	203880500	184829500	20276060	89350700	112121600	114240600	127194500	32261510	86069870	135999200	109886400	133987000	16973400	87325610	188536900	157954900	175046200	11050210	42532950	176831900	165183600	147603600	17694200	71253790	128790300	308436900	29447310	78281500	155296700	129285100	113212900
O09172	GSH0_MOUSE Glutamate--cysteine ligase regulatory subunit OS=Mus musculus OX=10090 GN=Gclm PE=1 SV=1	Gclm	sp|O09172|GSH0_MOUSE Glutamate--cysteine ligase regulatory subunit OS=Mus musculus OX=10090 GN=Gclm PE=1 SV=1	sp|O09172|GSH0_MOUSE Glutamate--cysteine ligase regulatory subunit OS=Mus musculus OX=10090 GN=Gclm PE=1 SV=1	29904870	24619720	37709790	19997570	27313690	25834350	28823540	32966230	39170050	37479510	32588070	22508440	30944970	10666290	25488930	34295700	28143180	24258470	43547790	6050865	10997590	20330890	11365720	9643418	6790907	7983180	18030120	16565700	13340600	8018520	10262570	16703390	16489910	8052275	11092240	10846090	11956820	9929977
O09173	HGD_MOUSE Homogentisate 1,2-dioxygenase OS=Mus musculus OX=10090 GN=Hgd PE=1 SV=2	Hgd	sp|O09173|HGD_MOUSE Homogentisate 1,2-dioxygenase OS=Mus musculus OX=10090 GN=Hgd PE=1 SV=2	sp|O09173|HGD_MOUSE Homogentisate 1,2-dioxygenase OS=Mus musculus OX=10090 GN=Hgd PE=1 SV=2	480716000	416998400	561631700	554571500	410845900	436326400	495528200	745528400	653228900	506526600	586030900	788472800	514893700	490068800	365668400	435186800	662424600	406448000	760457400	193138000	418965300	786610200	776651800	639512600	342661600	397695100	601905900	846984600	834587000	209782300	334422000	531451800	1102035000	172074200	474369700	509052200	559897900	692278000
O09174	AMACR_MOUSE Alpha-methylacyl-CoA racemase OS=Mus musculus OX=10090 GN=Amacr PE=1 SV=4	Amacr	sp|O09174|AMACR_MOUSE Alpha-methylacyl-CoA racemase OS=Mus musculus OX=10090 GN=Amacr PE=1 SV=4	sp|O09174|AMACR_MOUSE Alpha-methylacyl-CoA racemase OS=Mus musculus OX=10090 GN=Amacr PE=1 SV=4	1802315000	1793535000	2831782000	2391124000	1700388000	2048512000	2623998000	2400562000	1797426000	1900303000	2372785000	3254609000	3437166000	1771898000	2073217000	2311437000	2565157000	2305481000	2238925000	1656835000	1979131000	2807473000	1923360000	1937203000	1683520000	2124651000	2127686000	2033516000	1790815000	1722538000	1830358000	2137427000	2120606000	1432673000	2103279000	1531469000	1921738000	1580170000
O35071	KIF1C_MOUSE Kinesin-like protein KIF1C OS=Mus musculus OX=10090 GN=Kif1c PE=1 SV=2	Kif1c	sp|O35071|KIF1C_MOUSE Kinesin-like protein KIF1C OS=Mus musculus OX=10090 GN=Kif1c PE=1 SV=2	sp|O35071|KIF1C_MOUSE Kinesin-like protein KIF1C OS=Mus musculus OX=10090 GN=Kif1c PE=1 SV=2	471327	904510	1330772	1859098	1365057	96462.4	2517168	2020738	1577388	1415056	1923332	3069012	395055	681768	1379087	2217413	335244	589959	3146136	2200021	751087	823285	563219	953474	1180365	940608	1187982	333544	2658773	695112	1120454	3298828	797473	1107315	1056846	403352	946765	415345
O35074	PTGIS_MOUSE Prostacyclin synthase OS=Mus musculus OX=10090 GN=Ptgis PE=1 SV=1	Ptgis	sp|O35074|PTGIS_MOUSE Prostacyclin synthase OS=Mus musculus OX=10090 GN=Ptgis PE=1 SV=1	sp|O35074|PTGIS_MOUSE Prostacyclin synthase OS=Mus musculus OX=10090 GN=Ptgis PE=1 SV=1	1563305	2701861	1930129	2254230	3341489	1579192	4509571	1508486	3212189	3209884	4058540	3651080	1593105	3106408	1722173	1431583	2055754	1967526	3007589	1242926	1107648	4186623	2639146	2493159	1103862	2011291	5749931	2863507	3247502	1698525	1506857	3403372	4314307	921295	2011925	3985239	1880742	2661790
O35075	VP26C_MOUSE Vacuolar protein sorting-associated protein 26C OS=Mus musculus OX=10090 GN=Vps26c PE=1 SV=1	Vps26c	sp|O35075|VP26C_MOUSE Vacuolar protein sorting-associated protein 26C OS=Mus musculus OX=10090 GN=Vps26c PE=1 SV=1	sp|O35075|VP26C_MOUSE Vacuolar protein sorting-associated protein 26C OS=Mus musculus OX=10090 GN=Vps26c PE=1 SV=1	1525863	578614	2540402	1128124	1030118	885704	1998515	1353873	974462	2224864	814543	2091491	500547	869632	1881380	622765	2311117	458675	1239239	754464	950522	2671205	2297755	1997517	737939	582483	3534798	1962928	1827739	695411	678333	1622756	1867939	1770016	601428	2692172	2599463	2086798
O35098	DPYL4_MOUSE Dihydropyrimidinase-related protein 4 OS=Mus musculus OX=10090 GN=Dpysl4 PE=1 SV=1	Dpysl4	sp|O35098|DPYL4_MOUSE Dihydropyrimidinase-related protein 4 OS=Mus musculus OX=10090 GN=Dpysl4 PE=1 SV=1	sp|O35098|DPYL4_MOUSE Dihydropyrimidinase-related protein 4 OS=Mus musculus OX=10090 GN=Dpysl4 PE=1 SV=1	247252	69564	86975.3	63019.7	48995.9	131956	258108	156645	87371.3	328779	146528	220949	84655.6	133579	219381	67161.5	201590	180968	202196	137499	66391.8	254398	114426	302025	60233.4	31811.8	234014	216007	283135	210378	338580	255164	380197	108744	261971	255503	26206.8	127096
O35114	SCRB2_MOUSE Lysosome membrane protein 2 OS=Mus musculus OX=10090 GN=Scarb2 PE=1 SV=3	Scarb2	sp|O35114|SCRB2_MOUSE Lysosome membrane protein 2 OS=Mus musculus OX=10090 GN=Scarb2 PE=1 SV=3	sp|O35114|SCRB2_MOUSE Lysosome membrane protein 2 OS=Mus musculus OX=10090 GN=Scarb2 PE=1 SV=3	82246650	72130990	118693900	138097400	120169900	102058700	130005100	128893300	75437840	97420170	89114000	155741300	102558100	143185200	151516200	100576500	164584400	93027070	69094680	128088300	207151500	192662700	254044700	145324300	257713200	250289300	435800700	283206100	295499800	131266100	171903500	206732500	269902400	299390000	297265500	317375600	248784600	262472900
O35129	PHB2_MOUSE Prohibitin-2 OS=Mus musculus OX=10090 GN=Phb2 PE=1 SV=1	Phb2	sp|O35129|PHB2_MOUSE Prohibitin-2 OS=Mus musculus OX=10090 GN=Phb2 PE=1 SV=1	sp|O35129|PHB2_MOUSE Prohibitin-2 OS=Mus musculus OX=10090 GN=Phb2 PE=1 SV=1	3418416000	2298949000	2487081000	1787495000	2930932000	2072374000	1635023000	3070677000	1738044000	3180042000	2236934000	2104536000	2132008000	1053458000	2877251000	1871764000	1701695000	2094876000	1595333000	2747714000	1927825000	2604176000	2181133000	1304331000	2891826000	2254549000	2744066000	2398012000	1403862000	2339533000	2370895000	2009492000	2134017000	2981893000	2363062000	2230700000	2236522000	1405037000
O35166	GOSR2_MOUSE Golgi SNAP receptor complex member 2 OS=Mus musculus OX=10090 GN=Gosr2 PE=1 SV=2	Gosr2	sp|O35166|GOSR2_MOUSE Golgi SNAP receptor complex member 2 OS=Mus musculus OX=10090 GN=Gosr2 PE=1 SV=2	sp|O35166|GOSR2_MOUSE Golgi SNAP receptor complex member 2 OS=Mus musculus OX=10090 GN=Gosr2 PE=1 SV=2	6231216	7098339	13822340	14771870	3967896	6852195	11091040	17545270	13293000	5015019	9981484	8001098	10340430	7136944	4301159	7951783	12020020	10722750	12497530	2766735	7226067	14512040	7358953	11634540	3049443	4660297	11517030	10492510	8101092	3399903	4706773	8852634	13709170	6219938	5571690	7748078	6245326	7780328
O35215	DOPD_MOUSE D-dopachrome decarboxylase OS=Mus musculus OX=10090 GN=Ddt PE=1 SV=3	Ddt	sp|O35215|DOPD_MOUSE D-dopachrome decarboxylase OS=Mus musculus OX=10090 GN=Ddt PE=1 SV=3	sp|O35215|DOPD_MOUSE D-dopachrome decarboxylase OS=Mus musculus OX=10090 GN=Ddt PE=1 SV=3	191052500	255705800	166487000	147710000	181492900	180767800	321098700	281549300	342290000	213868500	285045400	271857000	248948000	118568600	161459300	280148100	344206800	201607800	368484000	43319840	51525340	67892000	133145900	197018500	23708790	24590590	50973960	82328140	148432400	46190600	108187700	78776320	239343000	18457380	43104290	48835050	100979800	49233830
O35226	PSMD4_MOUSE 26S proteasome non-ATPase regulatory subunit 4 OS=Mus musculus OX=10090 GN=Psmd4 PE=1 SV=1	Psmd4	sp|O35226|PSMD4_MOUSE 26S proteasome non-ATPase regulatory subunit 4 OS=Mus musculus OX=10090 GN=Psmd4 PE=1 SV=1	sp|O35226|PSMD4_MOUSE 26S proteasome non-ATPase regulatory subunit 4 OS=Mus musculus OX=10090 GN=Psmd4 PE=1 SV=1	4333097	2152097	1624392	1460116	2966584	2351472	2136411	2694068	3796287	4936428	2493148	1136992	3188888	950691	2177491	4184412	1813580	1772694	4047708	2569100	1463634	3325794	535642	302652	867762	836097	704814	476124	285920	1314688	2061189	1691604	2132766	868330	1738960	556989	1479073	376527
O35239	PTN9_MOUSE Tyrosine-protein phosphatase non-receptor type 9 OS=Mus musculus OX=10090 GN=Ptpn9 PE=1 SV=2	Ptpn9	sp|O35239|PTN9_MOUSE Tyrosine-protein phosphatase non-receptor type 9 OS=Mus musculus OX=10090 GN=Ptpn9 PE=1 SV=2	sp|O35239|PTN9_MOUSE Tyrosine-protein phosphatase non-receptor type 9 OS=Mus musculus OX=10090 GN=Ptpn9 PE=1 SV=2	2756126	975991	1870903	2319185	3155999	1411067	1742890	2761897	1362690	1512300	2783927	314495	941538	682604	1843597	2097392	445990	1166520	1739726	583505	362406	2483659	1027204	577021	894518	1817248	1577204	1420088	841171	876952	960046	1289895	2078354	1591003	1101747	755757	257327	1180961
O35250	EXOC7_MOUSE Exocyst complex component 7 OS=Mus musculus OX=10090 GN=Exoc7 PE=1 SV=2	Exoc7	sp|O35250|EXOC7_MOUSE Exocyst complex component 7 OS=Mus musculus OX=10090 GN=Exoc7 PE=1 SV=2	sp|O35250|EXOC7_MOUSE Exocyst complex component 7 OS=Mus musculus OX=10090 GN=Exoc7 PE=1 SV=2	1458848	1268798	1401021	1026309	1897703	1347328	1047894	1890385	1190105	1847127	1978846	2696373	757228	985385	1584463	634575	767176	761424	1299969	1819308	2182983	833948	884900	1061079	1099864	767312	990824	998230	1138725	1265758	2862960	564030	1089093	1541649	1007752	701778	911680	1011540
O35286	DHX15_MOUSE Pre-mRNA-splicing factor ATP-dependent RNA helicase DHX15 OS=Mus musculus OX=10090 GN=Dhx15 PE=1 SV=2	Dhx15	sp|O35286|DHX15_MOUSE Pre-mRNA-splicing factor ATP-dependent RNA helicase DHX15 OS=Mus musculus OX=10090 GN=Dhx15 PE=1 SV=2	sp|O35286|DHX15_MOUSE Pre-mRNA-splicing factor ATP-dependent RNA helicase DHX15 OS=Mus musculus OX=10090 GN=Dhx15 PE=1 SV=2	538460	3043329	3406543	1890958	2504372	2550981	1903162	2035891	2327149	2705293	2503269	3538421	2256268	2453989	2304241	3341849	4836686	1524699	2831374	1820087	2722701	1763233	3575797	4012839	2968360	2671730	4535262	5080343	4540588	2149620	3611410	4183434	5473204	3439960	2883671	3705963	2752956	4011117
O35295	PURB_MOUSE Transcriptional activator protein Pur-beta OS=Mus musculus OX=10090 GN=Purb PE=1 SV=3	Purb	sp|O35295|PURB_MOUSE Transcriptional activator protein Pur-beta OS=Mus musculus OX=10090 GN=Purb PE=1 SV=3	sp|O35295|PURB_MOUSE Transcriptional activator protein Pur-beta OS=Mus musculus OX=10090 GN=Purb PE=1 SV=3	1258285	815511	730912	599406	795893	527635	1309050	700103	778577	667901	1081313	2176495	769519	429322	983926	810024	1921614	598994	880508	504742	904683	1563612	1337061	1088817	218094	248960	1267540	1299050	1055955	165353	409034	538597	2421629	539893	670586	1601201	900680	444356
O35309	NMI_MOUSE N-myc-interactor OS=Mus musculus OX=10090 GN=Nmi PE=1 SV=1	Nmi	sp|O35309|NMI_MOUSE N-myc-interactor OS=Mus musculus OX=10090 GN=Nmi PE=1 SV=1	sp|O35309|NMI_MOUSE N-myc-interactor OS=Mus musculus OX=10090 GN=Nmi PE=1 SV=1	712197	893378	1041615	1505443	1528029	288902	1691845	705905	488693	1433839	1921886	2314863	1898195	1373721	1165574	536786	1854821	412330	1149629	558990	467450	1311729	774014	383487	1235767	266912	1140647	246854	887867	878837	285777	1112629	1586728	469731	385663	661240	988067	361029
O35316	SC6A6_MOUSE Sodium- and chloride-dependent taurine transporter OS=Mus musculus OX=10090 GN=Slc6a6 PE=1 SV=2	Slc6a6	sp|O35316|SC6A6_MOUSE Sodium- and chloride-dependent taurine transporter OS=Mus musculus OX=10090 GN=Slc6a6 PE=1 SV=2	sp|O35316|SC6A6_MOUSE Sodium- and chloride-dependent taurine transporter OS=Mus musculus OX=10090 GN=Slc6a6 PE=1 SV=2	8591569	1737989	2507453	1131459	2644550	747540	1730808	3165189	2113305	1719369	5867114	2420637	4690018	6145430	1361015	4031834	1952807	1540843	849449	6376076	5369552	4124422	3283153	1873228	2352763	2116709	11660880	4810354	5757980	1286908	2488898	2242635	6472995	2081919	1079485	4201912	2348801	3516960
O35326	SRSF5_MOUSE Serine/arginine-rich splicing factor 5 OS=Mus musculus OX=10090 GN=Srsf5 PE=1 SV=2	Srsf5	sp|O35326|SRSF5_MOUSE Serine/arginine-rich splicing factor 5 OS=Mus musculus OX=10090 GN=Srsf5 PE=1 SV=2	sp|O35326|SRSF5_MOUSE Serine/arginine-rich splicing factor 5 OS=Mus musculus OX=10090 GN=Srsf5 PE=1 SV=2	204199	145690	183373	434608	148864	436289	108876	64082.2	274427	558616	196258	573649	280487	53919.7	114198	33476.4	254977	37671.2	293241	102456	104553	242586	133284	209976	160078	195096	181902	57218.5	218426	152666	144766	82399.4	207334	71637.4	126991	242289	55610.9	188406
O35345	IMA7_MOUSE Importin subunit alpha-7 OS=Mus musculus OX=10090 GN=Kpna6 PE=1 SV=2	Kpna6	sp|O35345|IMA7_MOUSE Importin subunit alpha-7 OS=Mus musculus OX=10090 GN=Kpna6 PE=1 SV=2	sp|O35345|IMA7_MOUSE Importin subunit alpha-7 OS=Mus musculus OX=10090 GN=Kpna6 PE=1 SV=2	173840	320609	198556	99542.9	299081	106298	283784	289888	60448.6	693853	298924	285931	281515	375114	466450	297461	252633	156980	335306	307098	33926.5	242563	131635	84129.9	188191	139442	111701	120168	169459	169572	30022.6	149174	405162	108983	127041	45130.6	18187.6	55413.8
O35350	CAN1_MOUSE Calpain-1 catalytic subunit OS=Mus musculus OX=10090 GN=Capn1 PE=1 SV=1	Capn1	sp|O35350|CAN1_MOUSE Calpain-1 catalytic subunit OS=Mus musculus OX=10090 GN=Capn1 PE=1 SV=1	sp|O35350|CAN1_MOUSE Calpain-1 catalytic subunit OS=Mus musculus OX=10090 GN=Capn1 PE=1 SV=1	488622	350443	326746	194482	864563	225236	147735	841936	319232	696162	730677	774060	492927	500160	861245	447434	736221	171950	421743	411459	360113	684492	577586	159804	778033	350997	1149021	440732	568778	299144	325818	392000	194747	225125	819421	650464	361310	596568
O35381	AN32A_MOUSE Acidic leucine-rich nuclear phosphoprotein 32 family member A OS=Mus musculus OX=10090 GN=Anp32a PE=1 SV=1	Anp32a	sp|O35381|AN32A_MOUSE Acidic leucine-rich nuclear phosphoprotein 32 family member A OS=Mus musculus OX=10090 GN=Anp32a PE=1 SV=1	sp|O35381|AN32A_MOUSE Acidic leucine-rich nuclear phosphoprotein 32 family member A OS=Mus musculus OX=10090 GN=Anp32a PE=1 SV=1	5724514	12428940	11013850	20014550	7639362	13857580	16785090	30256770	15290800	6649255	16075440	18296230	8825295	30342900	6826776	26225090	16217760	18303740	22802330	2937214	30251950	14020510	9961787	30437560	3007078	8037127	37079450	28872320	32992700	2384580	8902960	14527100	53968170	3353957	7043922	32054670	18028460	17186560
O35382	EXOC4_MOUSE Exocyst complex component 4 OS=Mus musculus OX=10090 GN=Exoc4 PE=1 SV=2	Exoc4	sp|O35382|EXOC4_MOUSE Exocyst complex component 4 OS=Mus musculus OX=10090 GN=Exoc4 PE=1 SV=2	sp|O35382|EXOC4_MOUSE Exocyst complex component 4 OS=Mus musculus OX=10090 GN=Exoc4 PE=1 SV=2	1051886	1189512	2358451	1573658	4454123	6070042	2384828	1681482	6959728	5490762	7621174	2544109	2544332	1148470	1785612	1354878	10140350	5135703	5738849	2101248	1303441	11010070	7223370	7407438	2758021	5034610	2904006	7902017	8894518	2110594	1439214	2159767	13010720	968951	7419721	9566308	4507997	1373837
O35386	PAHX_MOUSE Phytanoyl-CoA dioxygenase, peroxisomal OS=Mus musculus OX=10090 GN=Phyh PE=1 SV=1	Phyh	sp|O35386|PAHX_MOUSE Phytanoyl-CoA dioxygenase, peroxisomal OS=Mus musculus OX=10090 GN=Phyh PE=1 SV=1	sp|O35386|PAHX_MOUSE Phytanoyl-CoA dioxygenase, peroxisomal OS=Mus musculus OX=10090 GN=Phyh PE=1 SV=1	546280000	658241300	441833800	415616100	625185700	719881000	814565200	643954300	516988600	875543900	784540100	868152000	661537900	201157100	734330300	677935200	610747900	583806200	639428300	250187600	421085800	573581900	240291400	319070200	159519600	258453900	167336600	207652000	178791900	266606000	384518300	197669000	327814300	207050000	230252600	157074900	234451600	116785400
O35387	HAX1_MOUSE HCLS1-associated protein X-1 OS=Mus musculus OX=10090 GN=Hax1 PE=1 SV=1	Hax1	sp|O35387|HAX1_MOUSE HCLS1-associated protein X-1 OS=Mus musculus OX=10090 GN=Hax1 PE=1 SV=1	sp|O35387|HAX1_MOUSE HCLS1-associated protein X-1 OS=Mus musculus OX=10090 GN=Hax1 PE=1 SV=1	5772184	4643453	4458811	2447746	5934076	4227590	4351796	5296721	3219834	4996305	3685949	2195660	3985221	2115796	4301749	3496254	3952400	3519127	3196544	3690877	2600925	3932415	2298051	1905137	2199132	2393679	2977656	3292984	1873909	3863652	2967294	2935238	2646226	2687099	1895442	2045184	2090671	1508514
O35403	ST3A1_MOUSE Amine sulfotransferase OS=Mus musculus OX=10090 GN=Sult3a1 PE=2 SV=1	Sult3a1	sp|O35403|ST3A1_MOUSE Amine sulfotransferase OS=Mus musculus OX=10090 GN=Sult3a1 PE=2 SV=1	sp|O35403|ST3A1_MOUSE Amine sulfotransferase OS=Mus musculus OX=10090 GN=Sult3a1 PE=2 SV=1	2654791	1166725	2164467	824634	1567433	769208	2035057	2054781	1383204	2722746	1784491	1537843	1327614	411733	2000932	1587041	1435269	652480	1674547	721776	131908	1409862	255678	269004	534802	452910	350020	715576	1142191	375332	1165543	542828	912892	604227	326508	875655	608912	318496
O35405	PLD3_MOUSE Phospholipase D3 OS=Mus musculus OX=10090 GN=Pld3 PE=1 SV=1	Pld3	sp|O35405|PLD3_MOUSE Phospholipase D3 OS=Mus musculus OX=10090 GN=Pld3 PE=1 SV=1	sp|O35405|PLD3_MOUSE Phospholipase D3 OS=Mus musculus OX=10090 GN=Pld3 PE=1 SV=1	16370530	14802390	41928380	34262360	11307960	17644860	28876760	20136860	13374340	19693240	20391520	43628620	29578640	36590780	17846700	17121470	43707110	14789980	13578430	48801290	55690170	50351180	51714300	29074640	66646400	64779930	124476400	74496710	47332810	37797170	40464020	59755210	60043070	77186910	72863850	73291910	56250680	87861490
O35423	SPYA_MOUSE Serine--pyruvate aminotransferase, mitochondrial OS=Mus musculus OX=10090 GN=Agxt PE=1 SV=3	Agxt	sp|O35423|SPYA_MOUSE Serine--pyruvate aminotransferase, mitochondrial OS=Mus musculus OX=10090 GN=Agxt PE=1 SV=3	sp|O35423|SPYA_MOUSE Serine--pyruvate aminotransferase, mitochondrial OS=Mus musculus OX=10090 GN=Agxt PE=1 SV=3	5504718000	6136624000	6819591000	5834397000	5144236000	7058415000	6716495000	8335558000	5682663000	5199727000	7176461000	7671715000	10409440000	3661328000	6035153000	7434228000	4756370000	6510994000	6682394000	2215289000	5078664000	6084388000	5865124000	5993538000	4197868000	4702780000	5211306000	5988946000	5048210000	3894179000	5414599000	4400657000	6413563000	3956672000	5641967000	4706127000	4547264000	3116976000
O35435	PYRD_MOUSE Dihydroorotate dehydrogenase (quinone), mitochondrial OS=Mus musculus OX=10090 GN=Dhodh PE=1 SV=2	Dhodh	sp|O35435|PYRD_MOUSE Dihydroorotate dehydrogenase (quinone), mitochondrial OS=Mus musculus OX=10090 GN=Dhodh PE=1 SV=2	sp|O35435|PYRD_MOUSE Dihydroorotate dehydrogenase (quinone), mitochondrial OS=Mus musculus OX=10090 GN=Dhodh PE=1 SV=2	2800337	1744908	671462	680528	2524431	1583868	1262514	1184749	760422	2782432	2177094	2207035	752949	439264	2024453	1245162	1468360	1038035	1155216	2506000	1136139	929619	652690	327995	1127767	1014146	1087881	1035366	310693	1107386	1715698	1050260	963768	829080	886140	677176	809508	592784
O35448	PPT2_MOUSE Lysosomal thioesterase PPT2 OS=Mus musculus OX=10090 GN=Ppt2 PE=1 SV=1	Ppt2	sp|O35448|PPT2_MOUSE Lysosomal thioesterase PPT2 OS=Mus musculus OX=10090 GN=Ppt2 PE=1 SV=1	sp|O35448|PPT2_MOUSE Lysosomal thioesterase PPT2 OS=Mus musculus OX=10090 GN=Ppt2 PE=1 SV=1	2597335	1151486	1852273	3341068	4432365	3129228	2318862	2401854	4728284	3566211	4153411	2938391	6047384	4515288	4906805	1925312	4528594	1071654	4458752	8305885	12768910	7944872	10180280	3900799	13036980	13263390	19756700	14970630	7306669	4219290	4800773	5549570	13017800	15748200	14904580	10717680	14725530	10738980
O35453	HEPS_MOUSE Serine protease hepsin OS=Mus musculus OX=10090 GN=Hpn PE=1 SV=3	Hpn	sp|O35453|HEPS_MOUSE Serine protease hepsin OS=Mus musculus OX=10090 GN=Hpn PE=1 SV=3	sp|O35453|HEPS_MOUSE Serine protease hepsin OS=Mus musculus OX=10090 GN=Hpn PE=1 SV=3	31628470	28284160	30123650	25760280	46234700	32538660	40053250	36822600	24855220	50641430	42997700	35028280	30868650	21541210	31961680	44699570	37885840	33200590	35918950	22134360	33874130	38539790	34908610	24389650	19089230	24625740	40385590	33039720	32918630	18660290	26392860	28753680	53788280	25166270	30094950	30116010	38290770	27517080
O35459	ECH1_MOUSE Delta(3,5)-Delta(2,4)-dienoyl-CoA isomerase, mitochondrial OS=Mus musculus OX=10090 GN=Ech1 PE=1 SV=1	Ech1	sp|O35459|ECH1_MOUSE Delta(3,5)-Delta(2,4)-dienoyl-CoA isomerase, mitochondrial OS=Mus musculus OX=10090 GN=Ech1 PE=1 SV=1	sp|O35459|ECH1_MOUSE Delta(3,5)-Delta(2,4)-dienoyl-CoA isomerase, mitochondrial OS=Mus musculus OX=10090 GN=Ech1 PE=1 SV=1	963184200	660630600	874583100	888323600	827713500	694475100	1015796000	1087679000	821894200	969546100	796678800	1196008000	989304200	783775600	1069304000	917506800	895617700	979365600	779320300	1012869000	788727300	1332362000	1184281000	936638300	1280664000	1053370000	1254685000	1204637000	1188510000	877291300	775130300	925786300	1607137000	1224160000	1176324000	1198350000	1154245000	907519900
O35465	FKBP8_MOUSE Peptidyl-prolyl cis-trans isomerase FKBP8 OS=Mus musculus OX=10090 GN=Fkbp8 PE=1 SV=2	Fkbp8	sp|O35465|FKBP8_MOUSE Peptidyl-prolyl cis-trans isomerase FKBP8 OS=Mus musculus OX=10090 GN=Fkbp8 PE=1 SV=2	sp|O35465|FKBP8_MOUSE Peptidyl-prolyl cis-trans isomerase FKBP8 OS=Mus musculus OX=10090 GN=Fkbp8 PE=1 SV=2	30379900	44212150	45017650	30599610	31255190	35158860	44473160	50540330	38040100	33568710	42832130	29329790	42039190	14321290	31161750	34774980	44040450	29009620	40434660	7941985	17101910	13654790	11396380	18605130	2260163	4371138	9163863	10401000	9883814	9208261	16210270	9046896	22589820	6069009	8279899	6692262	7196716	5023610
O35488	S27A2_MOUSE Very long-chain acyl-CoA synthetase OS=Mus musculus OX=10090 GN=Slc27a2 PE=1 SV=2	Slc27a2	sp|O35488|S27A2_MOUSE Very long-chain acyl-CoA synthetase OS=Mus musculus OX=10090 GN=Slc27a2 PE=1 SV=2	sp|O35488|S27A2_MOUSE Very long-chain acyl-CoA synthetase OS=Mus musculus OX=10090 GN=Slc27a2 PE=1 SV=2	1031843000	1746657000	2048886000	2000787000	949127300	1415520000	2222471000	2525146000	2392332000	980034700	1886810000	2668122000	1798180000	2031168000	1334550000	1720093000	2204981000	2126220000	2231283000	1557013000	1873281000	2618437000	3173018000	2975137000	912211200	1771513000	3420631000	3177640000	3469783000	818822700	1303120000	2141810000	4726976000	1728757000	2243137000	3282458000	2555122000	2804023000
O35490	BHMT1_MOUSE Betaine--homocysteine S-methyltransferase 1 OS=Mus musculus OX=10090 GN=Bhmt PE=1 SV=1	Bhmt	sp|O35490|BHMT1_MOUSE Betaine--homocysteine S-methyltransferase 1 OS=Mus musculus OX=10090 GN=Bhmt PE=1 SV=1	sp|O35490|BHMT1_MOUSE Betaine--homocysteine S-methyltransferase 1 OS=Mus musculus OX=10090 GN=Bhmt PE=1 SV=1	2648165000	3445774000	3246700000	4365143000	2695979000	2955900000	3537501000	5543158000	3616985000	2546512000	4150051000	4245471000	3755600000	1753489000	2142817000	2573750000	2992717000	3012239000	4385136000	1253762000	2544053000	2647554000	2721879000	2806832000	1261968000	2062695000	1138446000	2146740000	1869817000	1221923000	1934410000	1912036000	3688451000	903410100	1615090000	1143199000	2731573000	975397200
O35593	PSDE_MOUSE 26S proteasome non-ATPase regulatory subunit 14 OS=Mus musculus OX=10090 GN=Psmd14 PE=1 SV=2	Psmd14	sp|O35593|PSDE_MOUSE 26S proteasome non-ATPase regulatory subunit 14 OS=Mus musculus OX=10090 GN=Psmd14 PE=1 SV=2	sp|O35593|PSDE_MOUSE 26S proteasome non-ATPase regulatory subunit 14 OS=Mus musculus OX=10090 GN=Psmd14 PE=1 SV=2	5393808	2426529	5670484	1269130	4142708	2557364	3502501	2826293	4064770	5998429	7222157	3934268	3789849	2455530	1780452	5946292	5037153	1355805	4095987	1013373	1419696	5424536	2978323	717764	704408	243685	1023587	1581840	2853536	1473387	3342355	4120172	3975340	889634	930096	2473701	1797983	795817
O35598	ADA10_MOUSE Disintegrin and metalloproteinase domain-containing protein 10 OS=Mus musculus OX=10090 GN=Adam10 PE=1 SV=2	Adam10	sp|O35598|ADA10_MOUSE Disintegrin and metalloproteinase domain-containing protein 10 OS=Mus musculus OX=10090 GN=Adam10 PE=1 SV=2	sp|O35598|ADA10_MOUSE Disintegrin and metalloproteinase domain-containing protein 10 OS=Mus musculus OX=10090 GN=Adam10 PE=1 SV=2	9893542	10310110	18295380	14216880	6959422	10619140	13205870	14928040	10271340	7884797	14380090	12138490	17188090	12992030	8886007	10023020	16459940	10254790	10304550	15306910	10595390	12416870	15989630	11892600	5309659	7787558	25801240	21706360	16261020	7520900	12041840	15192160	23334100	10052980	14982930	17310490	14942400	17977810
O35604	NPC1_MOUSE NPC intracellular cholesterol transporter 1 OS=Mus musculus OX=10090 GN=Npc1 PE=1 SV=2	Npc1	sp|O35604|NPC1_MOUSE NPC intracellular cholesterol transporter 1 OS=Mus musculus OX=10090 GN=Npc1 PE=1 SV=2	sp|O35604|NPC1_MOUSE NPC intracellular cholesterol transporter 1 OS=Mus musculus OX=10090 GN=Npc1 PE=1 SV=2	44265920	45761530	80976420	114597300	63951470	62670320	73516040	100795200	48857420	44345170	39170100	111663600	74079660	103172800	96471250	52231870	97321070	79297510	55631380	76401680	135094300	162780400	216228700	155822400	183023700	168919300	230317300	220013900	213661000	105029800	104417400	134130400	244686400	223212100	204514600	259217200	273733700	188628800
O35609	SCAM3_MOUSE Secretory carrier-associated membrane protein 3 OS=Mus musculus OX=10090 GN=Scamp3 PE=1 SV=3	Scamp3	sp|O35609|SCAM3_MOUSE Secretory carrier-associated membrane protein 3 OS=Mus musculus OX=10090 GN=Scamp3 PE=1 SV=3	sp|O35609|SCAM3_MOUSE Secretory carrier-associated membrane protein 3 OS=Mus musculus OX=10090 GN=Scamp3 PE=1 SV=3	4696006	7077039	11523740	8392762	3828224	5670391	14269410	11809700	5528006	6656728	8043112	8423032	4959729	7002998	3462597	7941993	14014290	6603492	9551248	2496150	2237747	11749790	7335060	10029670	3471898	1587177	9680250	8268170	8446638	2745386	5856983	14057950	18278040	4758402	4996288	10974010	6523538	5738585
O35639	ANXA3_MOUSE Annexin A3 OS=Mus musculus OX=10090 GN=Anxa3 PE=1 SV=4	Anxa3	sp|O35639|ANXA3_MOUSE Annexin A3 OS=Mus musculus OX=10090 GN=Anxa3 PE=1 SV=4	sp|O35639|ANXA3_MOUSE Annexin A3 OS=Mus musculus OX=10090 GN=Anxa3 PE=1 SV=4	3808214	4373701	6410740	3545339	3726319	3247517	3258893	3068634	4687799	4142139	5508793	6504777	6039210	3217629	3058691	3286515	4850066	3688637	4090765	2934690	3358191	5280300	5066111	3973634	2209413	2999075	6183882	4248497	5444101	2403793	4753833	4521485	7189813	2835988	2854996	2918694	3739130	2857348
O35643	AP1B1_MOUSE AP-1 complex subunit beta-1 OS=Mus musculus OX=10090 GN=Ap1b1 PE=1 SV=2	Ap1b1	sp|O35643|AP1B1_MOUSE AP-1 complex subunit beta-1 OS=Mus musculus OX=10090 GN=Ap1b1 PE=1 SV=2	sp|O35643|AP1B1_MOUSE AP-1 complex subunit beta-1 OS=Mus musculus OX=10090 GN=Ap1b1 PE=1 SV=2	34337070	32710490	54017370	49635310	25629970	30928120	45256620	49993060	41275480	37890080	30396920	76452610	52093160	46750980	24368020	28916800	59152310	43203320	49681110	42655250	50454340	92362680	51663850	53116130	23908110	30661520	62406240	62086730	68343280	19133990	42526510	68642660	83278550	27363850	52179250	60919610	57945610	39314950
O35657	NEUR1_MOUSE Sialidase-1 OS=Mus musculus OX=10090 GN=Neu1 PE=1 SV=1	Neu1	sp|O35657|NEUR1_MOUSE Sialidase-1 OS=Mus musculus OX=10090 GN=Neu1 PE=1 SV=1	sp|O35657|NEUR1_MOUSE Sialidase-1 OS=Mus musculus OX=10090 GN=Neu1 PE=1 SV=1	469870	460832	1268092	1814953	539554	1110514	1140039	833179	387107	695002	664293	3411903	732142	1882229	482573	583310	2162241	867404	314915	8947597	7839675	2557934	5607131	968966	7182743	6047995	8275745	3833991	2307281	4285871	3556818	4092292	6685242	7042144	8580106	5288731	6634560	3664976
O35658	C1QBP_MOUSE Complement component 1 Q subcomponent-binding protein, mitochondrial OS=Mus musculus OX=10090 GN=C1qbp PE=1 SV=1	C1qbp	sp|O35658|C1QBP_MOUSE Complement component 1 Q subcomponent-binding protein, mitochondrial OS=Mus musculus OX=10090 GN=C1qbp PE=1 SV=1	sp|O35658|C1QBP_MOUSE Complement component 1 Q subcomponent-binding protein, mitochondrial OS=Mus musculus OX=10090 GN=C1qbp PE=1 SV=1	121078200	90611410	113358900	53931030	143376800	76042240	70372510	85086580	44541720	144723100	92479380	108335500	77788580	49080870	114985300	67168570	102498200	51603920	35402090	187615100	93791340	91152340	84332940	40539480	203625500	133267200	204656100	128184600	62679340	117073700	112616600	109839900	95574160	192216500	120512700	104672700	98765130	96152000
O35660	GSTM6_MOUSE Glutathione S-transferase Mu 6 OS=Mus musculus OX=10090 GN=Gstm6 PE=1 SV=4	Gstm6	sp|O35660|GSTM6_MOUSE Glutathione S-transferase Mu 6 OS=Mus musculus OX=10090 GN=Gstm6 PE=1 SV=4	sp|O35660|GSTM6_MOUSE Glutathione S-transferase Mu 6 OS=Mus musculus OX=10090 GN=Gstm6 PE=1 SV=4	12279100	10939300	12248460	9770983	9268237	12024660	10217200	11871920	13366640	13108850	15898860	13202480	13946610	4100064	8509134	12498820	13226420	5617847	16736850	2330969	5565814	10102230	5597197	4875790	3582308	3788954	8939083	11394180	7838591	3251345	5473337	6982161	9316772	2529061	4177687	4961439	5528686	4525304
O35678	MGLL_MOUSE Monoglyceride lipase OS=Mus musculus OX=10090 GN=Mgll PE=1 SV=1	Mgll	sp|O35678|MGLL_MOUSE Monoglyceride lipase OS=Mus musculus OX=10090 GN=Mgll PE=1 SV=1	sp|O35678|MGLL_MOUSE Monoglyceride lipase OS=Mus musculus OX=10090 GN=Mgll PE=1 SV=1	82487570	74063150	70794950	69349220	84884840	60827040	102647800	91405300	79431970	104772300	86398510	78029720	70698710	38872040	83275450	83482430	71768230	102625500	117286300	33136170	31676080	79238500	42914460	47458850	32733880	46020210	32109800	38053550	43878760	18828040	44836710	51045700	66007450	24678340	64939230	48075820	43563470	64705930
O35682	MYADM_MOUSE Myeloid-associated differentiation marker OS=Mus musculus OX=10090 GN=Myadm PE=1 SV=2	Myadm	sp|O35682|MYADM_MOUSE Myeloid-associated differentiation marker OS=Mus musculus OX=10090 GN=Myadm PE=1 SV=2	sp|O35682|MYADM_MOUSE Myeloid-associated differentiation marker OS=Mus musculus OX=10090 GN=Myadm PE=1 SV=2	2347551	1500739	4619005	2048436	1773590	1843115	2367344	2559170	1427023	2835054	1999129	1653686	2639590	1598986	1828127	2581025	2718889	1960929	2371457	1285423	1193607	3236237	1717479	2012815	938083	957863	3005206	2709478	1801619	1584511	1806220	2223867	3236500	2008321	1397078	1625843	1762304	1720406
O35685	NUDC_MOUSE Nuclear migration protein nudC OS=Mus musculus OX=10090 GN=Nudc PE=1 SV=1	Nudc	sp|O35685|NUDC_MOUSE Nuclear migration protein nudC OS=Mus musculus OX=10090 GN=Nudc PE=1 SV=1	sp|O35685|NUDC_MOUSE Nuclear migration protein nudC OS=Mus musculus OX=10090 GN=Nudc PE=1 SV=1	129868	148226	461959	335993	501818	286581	445150	41905.7	180900	580824	196110	432721	370120	773859	230396	265030	483143	98554.9	375478	159344	173065	359534	474546	972355	203975	153522	131379	346447	59435.9	191243	189890	185151	1036047	219631	395790	101134	209579	332253
O35711	LIPB2_MOUSE Liprin-beta-2 OS=Mus musculus OX=10090 GN=Ppfibp2 PE=1 SV=3	Ppfibp2	sp|O35711|LIPB2_MOUSE Liprin-beta-2 OS=Mus musculus OX=10090 GN=Ppfibp2 PE=1 SV=3	sp|O35711|LIPB2_MOUSE Liprin-beta-2 OS=Mus musculus OX=10090 GN=Ppfibp2 PE=1 SV=3	219980	143941	466316	252795	61953.8	111168	331902	124747	322696	54820	79667.1	133623	186888	125630	200951	325014	297418	103088	45134.2	165417	139335	73812.6	203859	143334	68052.3	74060.7	624108	634096	128367	79907.1	196361	397101	501891	180867	130252	262145	384052	473118
O35728	CP4AE_MOUSE Cytochrome P450 4A14 OS=Mus musculus OX=10090 GN=Cyp4a14 PE=1 SV=1	Cyp4a14	sp|O35728|CP4AE_MOUSE Cytochrome P450 4A14 OS=Mus musculus OX=10090 GN=Cyp4a14 PE=1 SV=1	sp|O35728|CP4AE_MOUSE Cytochrome P450 4A14 OS=Mus musculus OX=10090 GN=Cyp4a14 PE=1 SV=1	193061700	331255100	375714300	622476100	201183600	243616800	493051300	897975000	693959800	180956500	401003800	851894100	306369900	348744300	337924800	495897200	569584300	848943500	419885400	188306400	311196900	775535500	699036100	810559400	178721300	384642500	1003253000	486956800	1133816000	147925200	220996400	509455900	1083539000	454530700	440834600	741466300	477541700	717658700
O35737	HNRH1_MOUSE Heterogeneous nuclear ribonucleoprotein H OS=Mus musculus OX=10090 GN=Hnrnph1 PE=1 SV=3	Hnrnph1	sp|O35737|HNRH1_MOUSE Heterogeneous nuclear ribonucleoprotein H OS=Mus musculus OX=10090 GN=Hnrnph1 PE=1 SV=3	sp|O35737|HNRH1_MOUSE Heterogeneous nuclear ribonucleoprotein H OS=Mus musculus OX=10090 GN=Hnrnph1 PE=1 SV=3	37873.2	40217.6	23139.8	66547.1	64145.6	146984	80209.9	37479.6	172040	142202	143084	108153	4192.65	86465.7	9312.9	40962.8	95484.1	66621.7	64914.1	81449	44136.6	36508.8	192098	137542	62841.6	38452.3	50461.2	36062.1	49399.2	65966.1	112017	31608.4	211899	63326.3	127104	51514.5	24382.8	0
O35744	CHIL3_MOUSE Chitinase-like protein 3 OS=Mus musculus OX=10090 GN=Chil3 PE=1 SV=2	Chil3	sp|O35744|CHIL3_MOUSE Chitinase-like protein 3 OS=Mus musculus OX=10090 GN=Chil3 PE=1 SV=2	sp|O35744|CHIL3_MOUSE Chitinase-like protein 3 OS=Mus musculus OX=10090 GN=Chil3 PE=1 SV=2	98695430	73531780	92510660	71697660	40354120	52267260	36859450	50360250	28464320	58574650	54285280	121745000	90379110	147929100	77778850	70044820	100312500	39597020	76771080	59279740	70930560	60371610	120434900	95982600	28474860	102803500	74307920	307480000	36675370	29730930	61295070	47403340	45604530	155577200	37013510	49225830	40445270	73242760
O35855	BCAT2_MOUSE Branched-chain-amino-acid aminotransferase, mitochondrial OS=Mus musculus OX=10090 GN=Bcat2 PE=1 SV=2	Bcat2	sp|O35855|BCAT2_MOUSE Branched-chain-amino-acid aminotransferase, mitochondrial OS=Mus musculus OX=10090 GN=Bcat2 PE=1 SV=2	sp|O35855|BCAT2_MOUSE Branched-chain-amino-acid aminotransferase, mitochondrial OS=Mus musculus OX=10090 GN=Bcat2 PE=1 SV=2	32609050	6816522	59810940	33302890	16106020	15949320	24850670	22060220	9407506	95242300	30559590	22486730	48999300	23611790	19161210	17759070	31056790	14926050	8744707	315080600	19347080	29689300	24304240	10876900	15634080	22236110	74137110	44917220	13327490	49160370	21952140	40040280	16388100	26766450	36187050	24220490	27175100	56662150
O35857	TIM44_MOUSE Mitochondrial import inner membrane translocase subunit TIM44 OS=Mus musculus OX=10090 GN=Timm44 PE=1 SV=2	Timm44	sp|O35857|TIM44_MOUSE Mitochondrial import inner membrane translocase subunit TIM44 OS=Mus musculus OX=10090 GN=Timm44 PE=1 SV=2	sp|O35857|TIM44_MOUSE Mitochondrial import inner membrane translocase subunit TIM44 OS=Mus musculus OX=10090 GN=Timm44 PE=1 SV=2	174613100	110934600	135028500	68332550	150912200	100500200	72588840	103908500	53222140	162215900	120143600	94374150	92395240	48458070	145130400	83854940	93697780	74901790	54006340	162720400	90867250	117697000	85357280	46903070	156743100	115784400	160509100	120439100	56172490	115187500	121598300	95053420	95011160	167521900	120290600	105806500	97935600	71448940
O35864	CSN5_MOUSE COP9 signalosome complex subunit 5 OS=Mus musculus OX=10090 GN=Cops5 PE=1 SV=3	Cops5	sp|O35864|CSN5_MOUSE COP9 signalosome complex subunit 5 OS=Mus musculus OX=10090 GN=Cops5 PE=1 SV=3	sp|O35864|CSN5_MOUSE COP9 signalosome complex subunit 5 OS=Mus musculus OX=10090 GN=Cops5 PE=1 SV=3	1779936	890120	1326776	1837109	1590287	1278677	747796	2232878	2902504	1338421	2195978	1561598	1648018	731195	2408202	1106342	3067620	693037	2720200	649298	3132607	4404239	2063719	2308277	378938	528607	1076227	2426825	2509720	513829	665578	735216	1143009	262478	716049	2042036	1292171	1051622
O35887	CALU_MOUSE Calumenin OS=Mus musculus OX=10090 GN=Calu PE=1 SV=1	Calu	sp|O35887|CALU_MOUSE Calumenin OS=Mus musculus OX=10090 GN=Calu PE=1 SV=1	sp|O35887|CALU_MOUSE Calumenin OS=Mus musculus OX=10090 GN=Calu PE=1 SV=1	34547940	77200390	133238900	81537500	37487250	68279680	110599900	103215800	82706580	37366680	79141210	129690300	94682920	91023830	45580010	64258980	125547800	80065820	87118850	25413620	76586280	121450200	77982360	90962080	19979550	57043730	126014100	119057800	78254600	34172000	59103680	107190900	140175200	55341210	72343310	88698160	71019790	78626140
O35943	FRDA_MOUSE Frataxin, mitochondrial OS=Mus musculus OX=10090 GN=Fxn PE=1 SV=1	Fxn	sp|O35943|FRDA_MOUSE Frataxin, mitochondrial OS=Mus musculus OX=10090 GN=Fxn PE=1 SV=1	sp|O35943|FRDA_MOUSE Frataxin, mitochondrial OS=Mus musculus OX=10090 GN=Fxn PE=1 SV=1	58316880	29156960	25531280	18702830	67427700	32876690	20646140	31753140	9801606	61876790	37276280	24027980	30779440	10471600	44886710	26339880	24467140	24803540	10646540	34281280	10694890	28698050	20135360	13078520	26115610	22552350	21990230	17351730	9531479	28825980	24917660	16949780	9361983	23109090	15896920	12412920	18776470	10457620
O35945	AL1A7_MOUSE Aldehyde dehydrogenase, cytosolic 1 OS=Mus musculus OX=10090 GN=Aldh1a7 PE=1 SV=1	Aldh1a7	sp|O35945|AL1A7_MOUSE Aldehyde dehydrogenase, cytosolic 1 OS=Mus musculus OX=10090 GN=Aldh1a7 PE=1 SV=1	sp|O35945|AL1A7_MOUSE Aldehyde dehydrogenase, cytosolic 1 OS=Mus musculus OX=10090 GN=Aldh1a7 PE=1 SV=1	45700920	27726550	44030640	39156850	45320070	31938180	33857840	52766380	50554980	40760550	46268060	43096110	43602140	26222350	32354620	36727390	46839200	28887730	66207490	22142580	23527550	51132820	32807750	27990520	35093680	22225910	32624120	28019150	34885200	28335850	20519250	54008770	43777850	17488880	25106680	24628480	62150640	17105160
O35955	PSB10_MOUSE Proteasome subunit beta type-10 OS=Mus musculus OX=10090 GN=Psmb10 PE=1 SV=1	Psmb10	sp|O35955|PSB10_MOUSE Proteasome subunit beta type-10 OS=Mus musculus OX=10090 GN=Psmb10 PE=1 SV=1	sp|O35955|PSB10_MOUSE Proteasome subunit beta type-10 OS=Mus musculus OX=10090 GN=Psmb10 PE=1 SV=1	21083	0	115515	44596.6	34981.5	23765	47412.6	74629.7	30403.1	9638.82	69047.8	95938.1	119043	37797.4	6072.29	6191.51	250758	17371.1	21280.6	6653.41	10277.1	0	11330	34273.8	6260.96	3977.08	6289.45	41706.8	0	7286.58	5840.69	4791.48	28791.3	8412.36	8471.42	6950.37	7157.44	7992.12
O35963	RB33B_MOUSE Ras-related protein Rab-33B OS=Mus musculus OX=10090 GN=Rab33b PE=1 SV=1	Rab33b	sp|O35963|RB33B_MOUSE Ras-related protein Rab-33B OS=Mus musculus OX=10090 GN=Rab33b PE=1 SV=1	sp|O35963|RB33B_MOUSE Ras-related protein Rab-33B OS=Mus musculus OX=10090 GN=Rab33b PE=1 SV=1	396787900	368724400	635843800	448384300	304510700	397051100	563338700	615188400	439673500	346318300	358294600	660941100	496845500	395582100	375594700	424063500	587906300	395333700	465945300	390320300	430379000	683188200	624828900	416337800	394079600	534197900	1007700000	633282700	621270300	248550900	356607800	599818600	762197800	432114800	505518700	669398200	578226900	615480300
O35969	GAMT_MOUSE Guanidinoacetate N-methyltransferase OS=Mus musculus OX=10090 GN=Gamt PE=1 SV=1	Gamt	sp|O35969|GAMT_MOUSE Guanidinoacetate N-methyltransferase OS=Mus musculus OX=10090 GN=Gamt PE=1 SV=1	sp|O35969|GAMT_MOUSE Guanidinoacetate N-methyltransferase OS=Mus musculus OX=10090 GN=Gamt PE=1 SV=1	70171290	39757680	47636560	19174750	66852490	41565360	38995020	44753000	60793730	70914990	59874010	30007980	64432000	12909800	41354090	53610040	34105020	30980600	61878480	5424524	13276300	34433950	9042566	12596980	6725432	7909595	10099140	16301550	10888770	11752810	14124260	18482910	21255730	5379306	7834659	7618865	12619610	6656048
O35972	RM23_MOUSE 39S ribosomal protein L23, mitochondrial OS=Mus musculus OX=10090 GN=Mrpl23 PE=1 SV=1	Mrpl23	sp|O35972|RM23_MOUSE 39S ribosomal protein L23, mitochondrial OS=Mus musculus OX=10090 GN=Mrpl23 PE=1 SV=1	sp|O35972|RM23_MOUSE 39S ribosomal protein L23, mitochondrial OS=Mus musculus OX=10090 GN=Mrpl23 PE=1 SV=1	4351873	2637791	2796245	1747585	4706029	1872710	1909491	2359761	1340874	5413618	3269139	2857859	2194684	706359	2897826	1818919	2049081	884325	905444	2467070	1646972	1537582	958665	905188	1358623	664313	1441665	1163267	659135	1183296	2686379	1452358	1359434	1307226	1429805	928831	2024934	675618
O35988	SDC4_MOUSE Syndecan-4 OS=Mus musculus OX=10090 GN=Sdc4 PE=1 SV=1	Sdc4	sp|O35988|SDC4_MOUSE Syndecan-4 OS=Mus musculus OX=10090 GN=Sdc4 PE=1 SV=1	sp|O35988|SDC4_MOUSE Syndecan-4 OS=Mus musculus OX=10090 GN=Sdc4 PE=1 SV=1	9337797	7380939	9560438	3345505	25112200	21023510	18334350	23474580	16645850	27075810	12154960	4476347	5263532	4369031	17730100	25505360	12463610	17211920	40651670	4865314	3353129	2964962	2485935	3932708	2170567	2512990	3811787	7091670	5546969	792083	3458874	2469983	4231561	6086479	2364780	2013874	3326565	3161049
O54692	ZW10_MOUSE Centromere/kinetochore protein zw10 homolog OS=Mus musculus OX=10090 GN=Zw10 PE=1 SV=3	Zw10	sp|O54692|ZW10_MOUSE Centromere/kinetochore protein zw10 homolog OS=Mus musculus OX=10090 GN=Zw10 PE=1 SV=3	sp|O54692|ZW10_MOUSE Centromere/kinetochore protein zw10 homolog OS=Mus musculus OX=10090 GN=Zw10 PE=1 SV=3	127179	219121	307786	174860	271248	171126	332783	369849	43710	350948	207848	361707	165011	128051	222903	145148	335668	140372	74410	184243	61844.3	228692	343103	121164	89233.2	130015	354508	296942	227408	79783.9	110716	208921	405362	43150.4	207907	200568	58450.8	199150
O54734	OST48_MOUSE Dolichyl-diphosphooligosaccharide--protein glycosyltransferase 48 kDa subunit OS=Mus musculus OX=10090 GN=Ddost PE=1 SV=2	Ddost	sp|O54734|OST48_MOUSE Dolichyl-diphosphooligosaccharide--protein glycosyltransferase 48 kDa subunit OS=Mus musculus OX=10090 GN=Ddost PE=1 SV=2	sp|O54734|OST48_MOUSE Dolichyl-diphosphooligosaccharide--protein glycosyltransferase 48 kDa subunit OS=Mus musculus OX=10090 GN=Ddost PE=1 SV=2	595614500	1731454000	2240991000	1913351000	709342200	1396517000	1865052000	2258494000	1892574000	549760300	1873516000	2227724000	1809108000	2041502000	984886700	1848547000	2117962000	1588827000	1957795000	695754200	2278154000	3619432000	3094484000	2456863000	722538500	1841703000	4112656000	3268934000	3369060000	877468600	2054838000	3090104000	3969073000	1934321000	2506457000	3151097000	2138342000	2641109000
O54749	CP2J5_MOUSE Cytochrome P450 2J5 OS=Mus musculus OX=10090 GN=Cyp2j5 PE=1 SV=1	Cyp2j5	sp|O54749|CP2J5_MOUSE Cytochrome P450 2J5 OS=Mus musculus OX=10090 GN=Cyp2j5 PE=1 SV=1	sp|O54749|CP2J5_MOUSE Cytochrome P450 2J5 OS=Mus musculus OX=10090 GN=Cyp2j5 PE=1 SV=1	96941200	172341200	240274000	243630700	100582300	146783300	134523600	291035800	230591600	101598300	125646600	100092700	129607700	83310750	109989800	166406200	104804300	132866100	239036200	66258900	103397800	162128700	175329300	209679100	61416660	82046420	218390300	233887000	159788500	85019530	108482900	194234900	282425500	138047600	73305830	226918700	130180500	75574960
O54750	CP2J6_MOUSE Cytochrome P450 2J6 OS=Mus musculus OX=10090 GN=Cyp2j6 PE=2 SV=2	Cyp2j6	sp|O54750|CP2J6_MOUSE Cytochrome P450 2J6 OS=Mus musculus OX=10090 GN=Cyp2j6 PE=2 SV=2	sp|O54750|CP2J6_MOUSE Cytochrome P450 2J6 OS=Mus musculus OX=10090 GN=Cyp2j6 PE=2 SV=2	2597084	518893	1605994	361413	1554350	1393105	666999	804634	901741	1864560	1587108	1087924	1715835	196442	1592895	442965	1441526	75062.2	310905	812208	410385	821310	498263	580242	429629	395804	244387	750607	671976	112002	544880	390626	683165	262198	540015	320428	644492	206405
O54774	AP3D1_MOUSE AP-3 complex subunit delta-1 OS=Mus musculus OX=10090 GN=Ap3d1 PE=1 SV=1	Ap3d1	sp|O54774|AP3D1_MOUSE AP-3 complex subunit delta-1 OS=Mus musculus OX=10090 GN=Ap3d1 PE=1 SV=1	sp|O54774|AP3D1_MOUSE AP-3 complex subunit delta-1 OS=Mus musculus OX=10090 GN=Ap3d1 PE=1 SV=1	7596696	4490963	12019710	16650310	6123022	5111783	12098810	15062180	9765867	7574733	7231774	9181719	9824232	9203813	7152154	7492909	10024350	8082941	7751916	6087428	8883070	18114970	17937730	10365380	9617565	10900940	29954030	23929070	21452530	6550611	7508713	15927060	22369980	9122863	10405170	23779390	13367070	14818560
O54782	MA2B2_MOUSE Epididymis-specific alpha-mannosidase OS=Mus musculus OX=10090 GN=Man2b2 PE=1 SV=2	Man2b2	sp|O54782|MA2B2_MOUSE Epididymis-specific alpha-mannosidase OS=Mus musculus OX=10090 GN=Man2b2 PE=1 SV=2	sp|O54782|MA2B2_MOUSE Epididymis-specific alpha-mannosidase OS=Mus musculus OX=10090 GN=Man2b2 PE=1 SV=2	15712500	16963080	30500120	38619850	18795420	22127050	20071240	23867690	10613250	19788790	17713850	54750680	22786720	54329170	26527920	17152270	38063830	15612820	12245940	68758600	119333200	61834000	110975700	55633270	139764600	152141300	129635300	124452900	104537200	69933240	62506220	62341590	113736400	164323300	144102100	106404600	115371200	102576800
O54865	GCYB1_MOUSE Guanylate cyclase soluble subunit beta-1 OS=Mus musculus OX=10090 GN=Gucy1b1 PE=1 SV=1	Gucy1b1	sp|O54865|GCYB1_MOUSE Guanylate cyclase soluble subunit beta-1 OS=Mus musculus OX=10090 GN=Gucy1b1 PE=1 SV=1	sp|O54865|GCYB1_MOUSE Guanylate cyclase soluble subunit beta-1 OS=Mus musculus OX=10090 GN=Gucy1b1 PE=1 SV=1	673059	1020147	2640445	1346925	1011984	1040393	1712621	1887975	1361211	1332825	1091658	1767146	2609394	1375192	607780	1647323	1436155	1562716	1518589	1500375	805101	2492800	1553193	2594188	835382	1126893	3386178	1697280	2184613	754037	1366713	2038360	1982695	1132074	1436368	2124705	933790	1552489
O54890	ITB3_MOUSE Integrin beta-3 OS=Mus musculus OX=10090 GN=Itgb3 PE=1 SV=2	Itgb3	sp|O54890|ITB3_MOUSE Integrin beta-3 OS=Mus musculus OX=10090 GN=Itgb3 PE=1 SV=2	sp|O54890|ITB3_MOUSE Integrin beta-3 OS=Mus musculus OX=10090 GN=Itgb3 PE=1 SV=2	3734834	3135067	5110644	2502788	3146167	2746927	3123135	3244715	1541892	6560436	3811925	3463852	2659120	2898272	2810588	3068240	3549004	2213096	2040873	3262659	3195715	4361933	4124508	2675890	1805762	1897305	8851876	4786388	4199149	4108829	6009933	4708474	5064888	4426758	4070630	4106993	2994252	4693093
O54909	RDH16_MOUSE Retinol dehydrogenase 16 OS=Mus musculus OX=10090 GN=Rdh16 PE=1 SV=1	Rdh16	sp|O54909|RDH16_MOUSE Retinol dehydrogenase 16 OS=Mus musculus OX=10090 GN=Rdh16 PE=1 SV=1	sp|O54909|RDH16_MOUSE Retinol dehydrogenase 16 OS=Mus musculus OX=10090 GN=Rdh16 PE=1 SV=1	62661650	75693790	49920060	71829320	42990810	58862580	64405540	96728340	84605520	59132440	78644440	98736720	40178960	49712710	44636700	53855110	59207020	58323220	82194200	38816460	88790040	127662400	65253500	88458910	45279680	106319100	131762300	53848370	103861500	34486200	31747220	83231570	124444700	51873930	81134480	108332500	96439900	83940610
O54950	AAKG1_MOUSE 5'-AMP-activated protein kinase subunit gamma-1 OS=Mus musculus OX=10090 GN=Prkag1 PE=1 SV=2	Prkag1	sp|O54950|AAKG1_MOUSE 5'-AMP-activated protein kinase subunit gamma-1 OS=Mus musculus OX=10090 GN=Prkag1 PE=1 SV=2	sp|O54950|AAKG1_MOUSE 5'-AMP-activated protein kinase subunit gamma-1 OS=Mus musculus OX=10090 GN=Prkag1 PE=1 SV=2	913606	1994617	2776546	1061931	922530	824858	1891353	1049377	1885543	1614492	1620982	3218275	2084911	1527075	458411	1754822	1683973	817391	1881915	369063	2081044	3243675	2110770	1623421	745758	1136583	1966267	1288393	3266491	886605	373884	1612136	3221648	480169	1168150	1721426	2548999	657974
O54962	BAF_MOUSE Barrier-to-autointegration factor OS=Mus musculus OX=10090 GN=Banf1 PE=1 SV=1	Banf1	sp|O54962|BAF_MOUSE Barrier-to-autointegration factor OS=Mus musculus OX=10090 GN=Banf1 PE=1 SV=1	sp|O54962|BAF_MOUSE Barrier-to-autointegration factor OS=Mus musculus OX=10090 GN=Banf1 PE=1 SV=1	689295	55857.3	649650	214050	757796	700951	652458	412273	164539	1088470	428606	882123	227918	126383	1123036	256916	793073	316318	595829	1344868	171276	872028	1137740	98745.7	591327	1100116	549846	903133	611947	540048	409157	1346662	502614	984744	1098578	868904	498092	825230
O54984	ASNA_MOUSE ATPase Asna1 OS=Mus musculus OX=10090 GN=Asna1 PE=1 SV=2	Asna1	sp|O54984|ASNA_MOUSE ATPase Asna1 OS=Mus musculus OX=10090 GN=Asna1 PE=1 SV=2	sp|O54984|ASNA_MOUSE ATPase Asna1 OS=Mus musculus OX=10090 GN=Asna1 PE=1 SV=2	3208122	1878053	3600135	2724032	2660989	2172157	2032496	2516751	3760515	3659122	3250038	1955225	3517917	1001689	2155417	3031573	2932577	2269501	5242025	1281130	1140680	3552064	1883858	1381658	1142407	796582	1362542	1736333	1568952	909744	821215	2079123	2449049	711986	1727011	1537080	1701902	1296382
O55003	BNIP3_MOUSE BCL2/adenovirus E1B 19 kDa protein-interacting protein 3 OS=Mus musculus OX=10090 GN=Bnip3 PE=1 SV=1	Bnip3	sp|O55003|BNIP3_MOUSE BCL2/adenovirus E1B 19 kDa protein-interacting protein 3 OS=Mus musculus OX=10090 GN=Bnip3 PE=1 SV=1	sp|O55003|BNIP3_MOUSE BCL2/adenovirus E1B 19 kDa protein-interacting protein 3 OS=Mus musculus OX=10090 GN=Bnip3 PE=1 SV=1	20848580	23575370	10726680	5092775	29553160	21566290	15112940	22865340	13302410	24571970	16466070	6041305	11020470	1543773	25101170	22993610	8290424	16097060	11317190	6048606	4967424	4270032	1778902	5009702	1062571	650932	771529	1291435	1659697	6125127	5728078	1111986	4585951	5629677	2387745	1129063	825382	886585
O55013	TPPC3_MOUSE Trafficking protein particle complex subunit 3 OS=Mus musculus OX=10090 GN=Trappc3 PE=1 SV=1	Trappc3	sp|O55013|TPPC3_MOUSE Trafficking protein particle complex subunit 3 OS=Mus musculus OX=10090 GN=Trappc3 PE=1 SV=1	sp|O55013|TPPC3_MOUSE Trafficking protein particle complex subunit 3 OS=Mus musculus OX=10090 GN=Trappc3 PE=1 SV=1	1414413	1230335	2375134	2598156	693930	1398585	1859394	2232653	2241877	1619453	1506817	1979498	2311008	1945119	1186870	1584130	2666122	1343413	2176430	1559593	986750	4606348	2318246	1920348	885415	890056	2210600	2149615	1883685	682166	1135452	2984523	2340152	359232	1241172	1868062	1792651	1936527
O55022	PGRC1_MOUSE Membrane-associated progesterone receptor component 1 OS=Mus musculus OX=10090 GN=Pgrmc1 PE=1 SV=4	Pgrmc1	sp|O55022|PGRC1_MOUSE Membrane-associated progesterone receptor component 1 OS=Mus musculus OX=10090 GN=Pgrmc1 PE=1 SV=4	sp|O55022|PGRC1_MOUSE Membrane-associated progesterone receptor component 1 OS=Mus musculus OX=10090 GN=Pgrmc1 PE=1 SV=4	1036014000	1864913000	2586373000	2066136000	1063506000	1501542000	2074943000	2783184000	2175814000	1065107000	1778393000	2390767000	1954809000	1779846000	1189818000	1595056000	2488857000	1940196000	1992435000	688143300	1881312000	3216682000	3330757000	2592912000	800637100	1371813000	3537229000	2661468000	2662240000	855600400	1344014000	2765954000	3963447000	1597433000	1939012000	2814318000	2312975000	2451043000
O55023	IMPA1_MOUSE Inositol monophosphatase 1 OS=Mus musculus OX=10090 GN=Impa1 PE=1 SV=1	Impa1	sp|O55023|IMPA1_MOUSE Inositol monophosphatase 1 OS=Mus musculus OX=10090 GN=Impa1 PE=1 SV=1	sp|O55023|IMPA1_MOUSE Inositol monophosphatase 1 OS=Mus musculus OX=10090 GN=Impa1 PE=1 SV=1	4187887	4200440	5434939	3563408	5197917	4369540	6437359	5067752	5625667	3629580	7023426	9260547	4884873	5608171	5014413	5561031	9621927	3164719	6071782	4139448	5942063	11055180	4644615	3146637	3378135	5249801	8833216	7066402	4713269	3533339	5150419	10851230	6715780	3483651	7118905	5796374	4095281	4031267
O55026	ENTP2_MOUSE Ectonucleoside triphosphate diphosphohydrolase 2 OS=Mus musculus OX=10090 GN=Entpd2 PE=1 SV=2	Entpd2	sp|O55026|ENTP2_MOUSE Ectonucleoside triphosphate diphosphohydrolase 2 OS=Mus musculus OX=10090 GN=Entpd2 PE=1 SV=2	sp|O55026|ENTP2_MOUSE Ectonucleoside triphosphate diphosphohydrolase 2 OS=Mus musculus OX=10090 GN=Entpd2 PE=1 SV=2	171328	184416	340252	136659	295246	122450	166889	110033	82500.2	289609	173642	330831	240828	77977.3	238410	115410	185668	163087	146892	293713	96402.3	273166	174167	202107	121655	64765.2	331285	254225	199959	97144.4	125497	258672	361305	138596	184909	204973	222746	191360
O55029	COPB2_MOUSE Coatomer subunit beta' OS=Mus musculus OX=10090 GN=Copb2 PE=1 SV=2	Copb2	sp|O55029|COPB2_MOUSE Coatomer subunit beta' OS=Mus musculus OX=10090 GN=Copb2 PE=1 SV=2	sp|O55029|COPB2_MOUSE Coatomer subunit beta' OS=Mus musculus OX=10090 GN=Copb2 PE=1 SV=2	20177940	13489000	20206740	18348490	9420354	11850960	21963740	18931190	17399060	18508400	23733900	28115850	18596170	19848630	12626050	21162790	28907690	12145910	16399760	11500600	16874320	37096100	23820100	12158590	12165150	10617850	71390520	32015950	23645930	11296680	21067320	26820790	28963980	10288710	25134570	33577560	19947350	22000180
O55060	TPMT_MOUSE Thiopurine S-methyltransferase OS=Mus musculus OX=10090 GN=Tpmt PE=1 SV=1	Tpmt	sp|O55060|TPMT_MOUSE Thiopurine S-methyltransferase OS=Mus musculus OX=10090 GN=Tpmt PE=1 SV=1	sp|O55060|TPMT_MOUSE Thiopurine S-methyltransferase OS=Mus musculus OX=10090 GN=Tpmt PE=1 SV=1	1556449	1128559	2518656	1542255	546005	1474693	979296	1230584	3572034	1277621	949286	1219264	2603399	1543995	672776	927158	531795	1301670	2412179	651936	756338	1965965	1898037	1620479	1494929	1032045	1168627	2420839	2257368	821574	962439	1495095	2608349	522264	1693284	800699	3086299	814113
O55070	DNSL3_MOUSE Deoxyribonuclease gamma OS=Mus musculus OX=10090 GN=Dnase1l3 PE=1 SV=1	Dnase1l3	sp|O55070|DNSL3_MOUSE Deoxyribonuclease gamma OS=Mus musculus OX=10090 GN=Dnase1l3 PE=1 SV=1	sp|O55070|DNSL3_MOUSE Deoxyribonuclease gamma OS=Mus musculus OX=10090 GN=Dnase1l3 PE=1 SV=1	73963	128562	186772	0	558325	12706.9	230653	448368	106153	688184	293507	123585	140134	0	137489	351773	159656	140839	359290	77693.4	66398.9	48141.5	95640.5	18442.1	52880.7	128464	63328.5	46809.6	23845.7	67924.2	142556	28265.5	99601.9	142499	61413.2	36359.8	69147.8	25738.3
O55071	CP2BJ_MOUSE Cytochrome P450 2B19 OS=Mus musculus OX=10090 GN=Cyp2b19 PE=2 SV=1	Cyp2b19	sp|O55071|CP2BJ_MOUSE Cytochrome P450 2B19 OS=Mus musculus OX=10090 GN=Cyp2b19 PE=2 SV=1	sp|O55071|CP2BJ_MOUSE Cytochrome P450 2B19 OS=Mus musculus OX=10090 GN=Cyp2b19 PE=2 SV=1	3265860	6269530	5912173	4585327	2402687	6069542	3791260	6652702	5112226	1391648	4101050	7025131	4592900	3835498	2708666	5280921	5538467	4439330	3583973	1864198	7840416	9075937	11466180	1390177	2388636	7680573	12861960	10434720	8376099	2824664	4379910	5897223	12938890	4360712	3433670	4786120	5967018	3429009
O55111	DSG2_MOUSE Desmoglein-2 OS=Mus musculus OX=10090 GN=Dsg2 PE=1 SV=3	Dsg2	sp|O55111|DSG2_MOUSE Desmoglein-2 OS=Mus musculus OX=10090 GN=Dsg2 PE=1 SV=3	sp|O55111|DSG2_MOUSE Desmoglein-2 OS=Mus musculus OX=10090 GN=Dsg2 PE=1 SV=3	45257610	30622530	18032360	11135650	41796050	31644690	26966130	23142150	26948930	54633640	30754750	21713580	22095830	8446119	30780350	36603160	30704070	20964110	31075820	11300430	13003460	19160520	13084800	11426490	6928019	7242103	11366810	10422820	15469540	8944503	13031560	17116750	26892360	6794524	8069277	11293850	10241010	6381988
O55125	NIPS1_MOUSE Protein NipSnap homolog 1 OS=Mus musculus OX=10090 GN=Nipsnap1 PE=1 SV=1	Nipsnap1	sp|O55125|NIPS1_MOUSE Protein NipSnap homolog 1 OS=Mus musculus OX=10090 GN=Nipsnap1 PE=1 SV=1	sp|O55125|NIPS1_MOUSE Protein NipSnap homolog 1 OS=Mus musculus OX=10090 GN=Nipsnap1 PE=1 SV=1	1241873000	778179700	548831500	421541900	1330927000	589039600	488380000	840501700	539559600	1249691000	903681900	623173600	568280000	211862300	918536900	484591900	508230100	472672700	430885800	577724300	374520700	496122700	444558800	274187900	384042400	355077800	705702000	505635300	275015900	357914800	526896700	415265800	487568900	408764400	353592400	457653500	489632100	247679100
O55126	NIPS2_MOUSE Protein NipSnap homolog 2 OS=Mus musculus OX=10090 GN=Nipsnap2 PE=1 SV=1	Nipsnap2	sp|O55126|NIPS2_MOUSE Protein NipSnap homolog 2 OS=Mus musculus OX=10090 GN=Nipsnap2 PE=1 SV=1	sp|O55126|NIPS2_MOUSE Protein NipSnap homolog 2 OS=Mus musculus OX=10090 GN=Nipsnap2 PE=1 SV=1	12323230	12140190	18631380	14016460	11419800	12525830	9810855	15386520	13446040	24776320	14789900	12271570	15858360	8715989	11138990	15969640	8024377	10513070	14455410	31955260	6306951	14381790	11214650	9546834	5770644	12920450	14838190	14570650	9557710	10374410	7927088	13211890	13642830	7144800	12490290	9948704	10601150	9975294
O55131	SEPT7_MOUSE Septin-7 OS=Mus musculus OX=10090 GN=Septin7 PE=1 SV=1	Septin7	sp|O55131|SEPT7_MOUSE Septin-7 OS=Mus musculus OX=10090 GN=Septin7 PE=1 SV=1	sp|O55131|SEPT7_MOUSE Septin-7 OS=Mus musculus OX=10090 GN=Septin7 PE=1 SV=1	9743055	11679270	17507400	11108240	7567559	11777520	18587820	13816300	10300590	8872007	13604030	33156510	12723890	14627420	8480836	8855939	23117260	11442010	12084950	6801085	13752190	20300780	16998070	14779720	9178101	12674550	30834200	29456980	19819970	6397879	13644700	20238840	32549200	10555940	18405860	19289550	14626700	18191840
O55142	RL35A_MOUSE 60S ribosomal protein L35a OS=Mus musculus OX=10090 GN=Rpl35a PE=1 SV=2	Rpl35a	sp|O55142|RL35A_MOUSE 60S ribosomal protein L35a OS=Mus musculus OX=10090 GN=Rpl35a PE=1 SV=2	sp|O55142|RL35A_MOUSE 60S ribosomal protein L35a OS=Mus musculus OX=10090 GN=Rpl35a PE=1 SV=2	65148270	220716500	301472100	305363800	56617560	171363400	231572500	331342400	315555600	36171560	167249500	216015600	172978200	278928400	78401400	181719000	257176700	255959700	294150600	49070690	222225100	542829000	453329600	414183000	45065620	176754200	605160900	468019800	435486000	33267480	147496700	320416900	564188000	79739030	210660700	501672600	343872100	400935100
O55143	AT2A2_MOUSE Sarcoplasmic/endoplasmic reticulum calcium ATPase 2 OS=Mus musculus OX=10090 GN=Atp2a2 PE=1 SV=2	Atp2a2	sp|O55143|AT2A2_MOUSE Sarcoplasmic/endoplasmic reticulum calcium ATPase 2 OS=Mus musculus OX=10090 GN=Atp2a2 PE=1 SV=2	sp|O55143|AT2A2_MOUSE Sarcoplasmic/endoplasmic reticulum calcium ATPase 2 OS=Mus musculus OX=10090 GN=Atp2a2 PE=1 SV=2	89226780	176038400	273174700	190186000	71368580	135100600	235841700	221802500	186346400	106520300	196727600	211678100	168373100	191355200	105328900	140515200	268157800	175709000	198097900	78838270	168210400	219472500	185316800	233341700	34031590	81928860	214832500	193300900	176036100	69750960	134869700	184681800	326687500	128836200	116509300	188739900	94249990	135950200
O55222	ILK_MOUSE Integrin-linked protein kinase OS=Mus musculus OX=10090 GN=Ilk PE=1 SV=2	Ilk	sp|O55222|ILK_MOUSE Integrin-linked protein kinase OS=Mus musculus OX=10090 GN=Ilk PE=1 SV=2	sp|O55222|ILK_MOUSE Integrin-linked protein kinase OS=Mus musculus OX=10090 GN=Ilk PE=1 SV=2	7352347	10549770	6949572	9294233	7774700	7980086	11889640	9798045	5490075	14601570	18054470	12276110	11848350	10678540	12083240	7359656	9693704	9871439	7813886	2864114	11245780	7172128	16288230	9506083	4438058	6082330	3491482	3994912	9810779	9547096	4751761	7775793	16311160	8125001	8600677	6867530	3698532	7361329
O55229	CHKB_MOUSE Choline/ethanolamine kinase OS=Mus musculus OX=10090 GN=Chkb PE=1 SV=3	Chkb	sp|O55229|CHKB_MOUSE Choline/ethanolamine kinase OS=Mus musculus OX=10090 GN=Chkb PE=1 SV=3	sp|O55229|CHKB_MOUSE Choline/ethanolamine kinase OS=Mus musculus OX=10090 GN=Chkb PE=1 SV=3	3617494	7879016	20761300	22093620	4126374	6498246	12119020	18505310	15005860	3238942	8307207	10116050	14856760	23068350	5869994	7924747	9630361	7576430	15615260	4233508	18223010	33245200	39367180	28696160	3631103	10827140	34027040	28822530	28918260	6110256	16140260	22437310	44880740	13801430	15617400	25770610	21426500	25005470
O55234	PSB5_MOUSE Proteasome subunit beta type-5 OS=Mus musculus OX=10090 GN=Psmb5 PE=1 SV=3	Psmb5	sp|O55234|PSB5_MOUSE Proteasome subunit beta type-5 OS=Mus musculus OX=10090 GN=Psmb5 PE=1 SV=3	sp|O55234|PSB5_MOUSE Proteasome subunit beta type-5 OS=Mus musculus OX=10090 GN=Psmb5 PE=1 SV=3	15757880	16098830	6515220	5841538	17680510	13564590	13855980	19281970	24997350	18199040	16073520	16253380	8111461	4366183	13927790	23295260	7488098	16035690	25060440	6839921	8614891	28405910	11366690	12124420	4037898	2540698	3602499	3514925	14733720	4014800	7698353	6514619	16005450	2603113	6375551	4440495	5644835	1964955
O55242	SGMR1_MOUSE Sigma non-opioid intracellular receptor 1 OS=Mus musculus OX=10090 GN=Sigmar1 PE=1 SV=1	Sigmar1	sp|O55242|SGMR1_MOUSE Sigma non-opioid intracellular receptor 1 OS=Mus musculus OX=10090 GN=Sigmar1 PE=1 SV=1	sp|O55242|SGMR1_MOUSE Sigma non-opioid intracellular receptor 1 OS=Mus musculus OX=10090 GN=Sigmar1 PE=1 SV=1	13235220	20448040	30949390	23975560	12392240	20631070	22425170	31962140	23931910	11453120	27640900	29927960	18030320	19817680	16971760	16127050	19061480	19898750	22757460	7837661	32841160	39667200	39166010	29062670	15193030	32124010	43272390	34563190	33802610	12718390	19622230	30499950	47194620	21277240	26988040	42582200	32339460	28186630
O70133	DHX9_MOUSE ATP-dependent RNA helicase A OS=Mus musculus OX=10090 GN=Dhx9 PE=1 SV=2	Dhx9	sp|O70133|DHX9_MOUSE ATP-dependent RNA helicase A OS=Mus musculus OX=10090 GN=Dhx9 PE=1 SV=2	sp|O70133|DHX9_MOUSE ATP-dependent RNA helicase A OS=Mus musculus OX=10090 GN=Dhx9 PE=1 SV=2	93030340	62885720	59526610	43323360	99414310	60807210	58550930	70580280	33607470	99904080	77053470	90707170	48887150	34493210	83313950	52854220	68143370	41029190	36006170	106793400	79775280	66521170	61529240	36871190	114216500	98885240	75978060	75483160	49711560	72613560	74028200	68531060	77239390	102587600	84903670	56243580	63611260	43726830
O70152	DPM1_MOUSE Dolichol-phosphate mannosyltransferase subunit 1 OS=Mus musculus OX=10090 GN=Dpm1 PE=1 SV=1	Dpm1	sp|O70152|DPM1_MOUSE Dolichol-phosphate mannosyltransferase subunit 1 OS=Mus musculus OX=10090 GN=Dpm1 PE=1 SV=1	sp|O70152|DPM1_MOUSE Dolichol-phosphate mannosyltransferase subunit 1 OS=Mus musculus OX=10090 GN=Dpm1 PE=1 SV=1	13800720	44310170	62551530	54187500	12983990	34330740	49955090	71163880	64476720	13500820	32352670	50462870	50143470	39691820	17406150	35121210	47774470	47181560	64080930	7653198	41380440	73410140	69742460	66299150	10123650	35985380	89393090	75701190	74623020	14520070	24560100	64571940	80980870	26212710	41773620	67804610	49595440	66839790
O70161	PI51C_MOUSE Phosphatidylinositol 4-phosphate 5-kinase type-1 gamma OS=Mus musculus OX=10090 GN=Pip5k1c PE=1 SV=2	Pip5k1c	sp|O70161|PI51C_MOUSE Phosphatidylinositol 4-phosphate 5-kinase type-1 gamma OS=Mus musculus OX=10090 GN=Pip5k1c PE=1 SV=2	sp|O70161|PI51C_MOUSE Phosphatidylinositol 4-phosphate 5-kinase type-1 gamma OS=Mus musculus OX=10090 GN=Pip5k1c PE=1 SV=2	1502538	1722362	1899041	1934701	572117	1039479	228531	2427187	1380922	1397841	1250438	1375884	2287068	1527310	1214638	101546	1268667	2446563	1339725	1710818	725508	4110552	2286122	1465613	724640	723671	4213142	3795925	3139424	1223690	1344403	3314974	2509822	859432	2678451	2441931	2560176	2953477
O70165	FCN1_MOUSE Ficolin-1 OS=Mus musculus OX=10090 GN=Fcn1 PE=1 SV=1	Fcn1	sp|O70165|FCN1_MOUSE Ficolin-1 OS=Mus musculus OX=10090 GN=Fcn1 PE=1 SV=1	sp|O70165|FCN1_MOUSE Ficolin-1 OS=Mus musculus OX=10090 GN=Fcn1 PE=1 SV=1	1071966	1015482	1181419	1783876	1051709	1224932	1082577	2042626	2101133	1254065	1900929	1106447	1641416	1058967	1289838	1039424	875733	1850027	1712961	1347234	1078707	2619208	1241081	1305466	373192	839013	1976881	1461704	822360	254758	752571	1178446	2206082	459468	609970	945760	1245061	971553
O70194	EIF3D_MOUSE Eukaryotic translation initiation factor 3 subunit D OS=Mus musculus OX=10090 GN=Eif3d PE=1 SV=2	Eif3d	sp|O70194|EIF3D_MOUSE Eukaryotic translation initiation factor 3 subunit D OS=Mus musculus OX=10090 GN=Eif3d PE=1 SV=2	sp|O70194|EIF3D_MOUSE Eukaryotic translation initiation factor 3 subunit D OS=Mus musculus OX=10090 GN=Eif3d PE=1 SV=2	4307080	3364938	3204996	2649584	3610062	3162986	3818284	3400351	3609737	6080054	6484518	5212279	4078566	2732239	3297901	3933840	4311092	2464525	4566591	1191533	2624404	4307018	2559890	2260424	539334	1608985	2065496	3513455	2716574	1146331	2710347	3390795	4538799	1442136	2283889	2031271	2140914	1514122
O70200	AIF1_MOUSE Allograft inflammatory factor 1 OS=Mus musculus OX=10090 GN=Aif1 PE=1 SV=1	Aif1	sp|O70200|AIF1_MOUSE Allograft inflammatory factor 1 OS=Mus musculus OX=10090 GN=Aif1 PE=1 SV=1	sp|O70200|AIF1_MOUSE Allograft inflammatory factor 1 OS=Mus musculus OX=10090 GN=Aif1 PE=1 SV=1	240032	485197	1380808	824018	375041	232963	1325797	862670	256040	569225	475268	957025	625069	636300	425792	119967	1210475	424179	229734	360964	615050	368559	476960	326310	138191	279435	384366	711825	209935	175004	778369	439603	1646999	302890	324834	396960	657147	713263
O70228	ATP9A_MOUSE Probable phospholipid-transporting ATPase IIA OS=Mus musculus OX=10090 GN=Atp9a PE=1 SV=3	Atp9a	sp|O70228|ATP9A_MOUSE Probable phospholipid-transporting ATPase IIA OS=Mus musculus OX=10090 GN=Atp9a PE=1 SV=3	sp|O70228|ATP9A_MOUSE Probable phospholipid-transporting ATPase IIA OS=Mus musculus OX=10090 GN=Atp9a PE=1 SV=3	532454	117367	694644	436931	401022	530906	627805	297691	646632	277613	114667	167835	124034	266205	284539	284380	318260	125469	180219	260161	320514	134562	315800	176719	220527	273473	703860	313200	497938	76813.2	273086	190004	296292	364286	388862	221719	404529	500285
O70251	EF1B_MOUSE Elongation factor 1-beta OS=Mus musculus OX=10090 GN=Eef1b PE=1 SV=5	Eef1b	sp|O70251|EF1B_MOUSE Elongation factor 1-beta OS=Mus musculus OX=10090 GN=Eef1b PE=1 SV=5	sp|O70251|EF1B_MOUSE Elongation factor 1-beta OS=Mus musculus OX=10090 GN=Eef1b PE=1 SV=5	53645310	38323450	34491390	26040190	43479610	35173650	35113800	36134650	42614470	57283870	57337040	42314910	42193180	13958000	31450370	42427730	37804810	28332060	45920580	9729767	13528450	46809640	9620966	17153510	3495075	6871332	15304400	13274110	15008050	9156671	16089970	19935090	19791090	4510408	12054210	10356360	8034859	8527531
O70252	HMOX2_MOUSE Heme oxygenase 2 OS=Mus musculus OX=10090 GN=Hmox2 PE=1 SV=1	Hmox2	sp|O70252|HMOX2_MOUSE Heme oxygenase 2 OS=Mus musculus OX=10090 GN=Hmox2 PE=1 SV=1	sp|O70252|HMOX2_MOUSE Heme oxygenase 2 OS=Mus musculus OX=10090 GN=Hmox2 PE=1 SV=1	183573200	153619100	160892000	107578100	142743800	92297400	139139000	177552900	91843000	205617800	81517630	86617070	121364400	65461960	159934200	128540600	139786400	102741800	97108550	38385860	100378200	140404100	108367700	75576780	148276700	97086270	131554400	121407000	74680480	99358230	139863200	140397700	119199600	128590600	161202100	93358490	45632230	68931010
O70281	TPST1_MOUSE Protein-tyrosine sulfotransferase 1 OS=Mus musculus OX=10090 GN=Tpst1 PE=1 SV=1	Tpst1	sp|O70281|TPST1_MOUSE Protein-tyrosine sulfotransferase 1 OS=Mus musculus OX=10090 GN=Tpst1 PE=1 SV=1	sp|O70281|TPST1_MOUSE Protein-tyrosine sulfotransferase 1 OS=Mus musculus OX=10090 GN=Tpst1 PE=1 SV=1	1649776	1913857	1701355	1676411	555720	854010	2115826	956441	1620310	1794216	1362226	1390212	1137311	2956861	1141665	1543036	1320625	2425852	478754	1477769	1825196	2626015	1977608	2916903	2124231	2059321	4074372	2391323	1960524	1028264	1402784	1881039	1585094	2147702	1342944	1864782	2233518	1171729
O70303	CIDEB_MOUSE Cell death activator CIDE-B OS=Mus musculus OX=10090 GN=Cideb PE=1 SV=2	Cideb	sp|O70303|CIDEB_MOUSE Cell death activator CIDE-B OS=Mus musculus OX=10090 GN=Cideb PE=1 SV=2	sp|O70303|CIDEB_MOUSE Cell death activator CIDE-B OS=Mus musculus OX=10090 GN=Cideb PE=1 SV=2	2292625	2075022	4726348	5568259	1471164	2981369	4547413	5500857	5366516	1987189	2556918	3398984	4247826	2780048	2618912	2803592	3273438	5507716	9191735	1006485	3323199	4484616	3616743	4394095	1704674	3553203	5461691	5338449	6389020	1539986	1739682	3223499	4691795	2599297	2047073	4996936	3697838	3676604
O70309	ITB5_MOUSE Integrin beta-5 OS=Mus musculus OX=10090 GN=Itgb5 PE=1 SV=2	Itgb5	sp|O70309|ITB5_MOUSE Integrin beta-5 OS=Mus musculus OX=10090 GN=Itgb5 PE=1 SV=2	sp|O70309|ITB5_MOUSE Integrin beta-5 OS=Mus musculus OX=10090 GN=Itgb5 PE=1 SV=2	1651289	1153317	1206941	3517832	1384865	1173820	985406	791226	1261093	1437515	1299222	1831741	830566	1240490	2455191	986688	1095185	1433455	1145865	1293815	847619	1929491	1766052	1787042	1396016	977201	2599960	460396	1744119	559349	1343328	1972557	2065532	1239705	639797	1327076	1725226	1794370
O70310	NMT1_MOUSE Glycylpeptide N-tetradecanoyltransferase 1 OS=Mus musculus OX=10090 GN=Nmt1 PE=1 SV=1	Nmt1	sp|O70310|NMT1_MOUSE Glycylpeptide N-tetradecanoyltransferase 1 OS=Mus musculus OX=10090 GN=Nmt1 PE=1 SV=1	sp|O70310|NMT1_MOUSE Glycylpeptide N-tetradecanoyltransferase 1 OS=Mus musculus OX=10090 GN=Nmt1 PE=1 SV=1	2445027	3524289	7847960	4175715	1213661	2987966	4194362	4165819	6199436	1490013	5192430	5342899	3119708	3467406	3354594	3474701	2702443	2916755	4974181	554433	3911599	3284758	5139285	4054109	733647	1488519	5615189	7227106	6557044	1115647	1692326	4570479	7228003	764722	3228379	2226344	5520703	3680194
O70318	E41L2_MOUSE Band 4.1-like protein 2 OS=Mus musculus OX=10090 GN=Epb41l2 PE=1 SV=2	Epb41l2	sp|O70318|E41L2_MOUSE Band 4.1-like protein 2 OS=Mus musculus OX=10090 GN=Epb41l2 PE=1 SV=2	sp|O70318|E41L2_MOUSE Band 4.1-like protein 2 OS=Mus musculus OX=10090 GN=Epb41l2 PE=1 SV=2	5005969	5171748	6807667	3753065	3554128	5159027	5035118	4029709	3677359	4567313	5446080	5136053	4253954	3617025	4097944	2642545	6961126	3731760	4166510	3239095	3350251	4208672	3146554	3323166	1566065	2257234	3224044	4525523	3362541	1859184	3876650	3314104	5032355	2275571	3055046	3014449	4306787	3594045
O70325	GPX4_MOUSE Phospholipid hydroperoxide glutathione peroxidase OS=Mus musculus OX=10090 GN=Gpx4 PE=1 SV=4	Gpx4	sp|O70325|GPX4_MOUSE Phospholipid hydroperoxide glutathione peroxidase OS=Mus musculus OX=10090 GN=Gpx4 PE=1 SV=4	sp|O70325|GPX4_MOUSE Phospholipid hydroperoxide glutathione peroxidase OS=Mus musculus OX=10090 GN=Gpx4 PE=1 SV=4	189094600	135677600	103550400	101300000	172903800	134409300	123957600	112574800	84312390	188718300	201516600	111207200	138341400	46492530	137889200	118026800	122131400	73260290	101841800	181410000	79717140	50687150	61566280	40209320	75146680	63996070	77473380	62758730	48720770	70622990	94754050	48307580	74792980	76613530	81026940	40010040	54179230	43671850
O70362	PHLD_MOUSE Phosphatidylinositol-glycan-specific phospholipase D OS=Mus musculus OX=10090 GN=Gpld1 PE=1 SV=1	Gpld1	sp|O70362|PHLD_MOUSE Phosphatidylinositol-glycan-specific phospholipase D OS=Mus musculus OX=10090 GN=Gpld1 PE=1 SV=1	sp|O70362|PHLD_MOUSE Phosphatidylinositol-glycan-specific phospholipase D OS=Mus musculus OX=10090 GN=Gpld1 PE=1 SV=1	33252360	48054130	36222310	36027640	43459710	45741440	44890650	51151010	33561860	34289600	56095510	36855850	46501670	51157300	41030940	55333310	44422550	42717440	45818640	10572860	45801540	38258500	34914590	41841370	6830435	17163540	26640030	29298060	24394850	15168400	32782620	27534880	61927490	12285540	28402450	28042970	26842770	24011450
O70370	CATS_MOUSE Cathepsin S OS=Mus musculus OX=10090 GN=Ctss PE=1 SV=2	Ctss	sp|O70370|CATS_MOUSE Cathepsin S OS=Mus musculus OX=10090 GN=Ctss PE=1 SV=2	sp|O70370|CATS_MOUSE Cathepsin S OS=Mus musculus OX=10090 GN=Ctss PE=1 SV=2	33386070	47671720	217490100	113199700	49329330	47103460	90285380	74870870	36640390	48066060	85499000	98854960	116383200	88713350	42843370	37914470	140410000	39629420	39236430	53378160	88235810	87995100	97672500	52086980	79166150	73095500	397817400	228329200	86350910	50349300	64887920	121218400	122401500	97555790	85512430	134599200	124676900	295679600
O70378	EMC8_MOUSE ER membrane protein complex subunit 8 OS=Mus musculus OX=10090 GN=Emc8 PE=1 SV=1	Emc8	sp|O70378|EMC8_MOUSE ER membrane protein complex subunit 8 OS=Mus musculus OX=10090 GN=Emc8 PE=1 SV=1	sp|O70378|EMC8_MOUSE ER membrane protein complex subunit 8 OS=Mus musculus OX=10090 GN=Emc8 PE=1 SV=1	12617340	28120850	21889370	18364190	13687840	19436160	23942520	26954230	27207440	12402800	33851370	24426580	18251440	16073040	12258060	22673490	22944430	21249310	26499190	5729500	24007100	35821630	22543740	22062710	4957997	12030750	24741630	21385650	19256800	8354313	14589940	21196840	29883700	12611690	14016320	17059810	15977340	15524310
O70400	PDLI1_MOUSE PDZ and LIM domain protein 1 OS=Mus musculus OX=10090 GN=Pdlim1 PE=1 SV=4	Pdlim1	sp|O70400|PDLI1_MOUSE PDZ and LIM domain protein 1 OS=Mus musculus OX=10090 GN=Pdlim1 PE=1 SV=4	sp|O70400|PDLI1_MOUSE PDZ and LIM domain protein 1 OS=Mus musculus OX=10090 GN=Pdlim1 PE=1 SV=4	3293005	1073649	1885205	1383150	3206329	4660395	4690291	3671134	3355714	4962970	2052139	3723333	4237312	750119	3097441	1997995	4595609	3375417	5837684	1424318	499683	1284521	1681931	1097003	540427	1171905	1761867	1385338	1252546	1151394	967431	1220116	1577169	904186	1073519	928824	1708836	761954
O70404	VAMP8_MOUSE Vesicle-associated membrane protein 8 OS=Mus musculus OX=10090 GN=Vamp8 PE=1 SV=1	Vamp8	sp|O70404|VAMP8_MOUSE Vesicle-associated membrane protein 8 OS=Mus musculus OX=10090 GN=Vamp8 PE=1 SV=1	sp|O70404|VAMP8_MOUSE Vesicle-associated membrane protein 8 OS=Mus musculus OX=10090 GN=Vamp8 PE=1 SV=1	12257030	16838510	26205920	15593880	27554870	30027620	27536030	32627100	18880660	22516530	22006630	11049010	14602730	16228420	32902730	26528040	23117540	24563850	23467670	11263560	11969500	16548840	14909900	16996840	7255538	7429030	19604150	14723490	16813730	6799942	11664700	14619070	25464930	15428040	13655190	16002030	12390770	15178830
O70435	PSA3_MOUSE Proteasome subunit alpha type-3 OS=Mus musculus OX=10090 GN=Psma3 PE=1 SV=3	Psma3	sp|O70435|PSA3_MOUSE Proteasome subunit alpha type-3 OS=Mus musculus OX=10090 GN=Psma3 PE=1 SV=3	sp|O70435|PSA3_MOUSE Proteasome subunit alpha type-3 OS=Mus musculus OX=10090 GN=Psma3 PE=1 SV=3	28976290	25654500	38048250	27775730	25799710	20323480	30799390	37863130	42776300	29179660	34090980	45893660	36630210	21013890	21174860	37480410	34016910	22657090	43002470	10102440	15412850	57824660	22913110	22739160	10166840	8174834	28833640	21450630	28756180	16967920	18549610	31842970	28567170	9391200	13862430	21790910	15257690	14488600
O70439	STX7_MOUSE Syntaxin-7 OS=Mus musculus OX=10090 GN=Stx7 PE=1 SV=3	Stx7	sp|O70439|STX7_MOUSE Syntaxin-7 OS=Mus musculus OX=10090 GN=Stx7 PE=1 SV=3	sp|O70439|STX7_MOUSE Syntaxin-7 OS=Mus musculus OX=10090 GN=Stx7 PE=1 SV=3	11018350	9973114	23347170	16114040	15023500	12439940	19488300	18534040	12272200	15157870	13845400	17458360	16786400	12905140	14127950	12313150	21454800	10373700	12965150	20063440	11388940	14273750	12808370	12477420	5256497	8605627	24557620	18525090	14363080	7960519	12262410	17262620	24008360	11823970	13456900	14292490	12657260	14071940
O70451	MOT2_MOUSE Monocarboxylate transporter 2 OS=Mus musculus OX=10090 GN=Slc16a7 PE=1 SV=1	Slc16a7	sp|O70451|MOT2_MOUSE Monocarboxylate transporter 2 OS=Mus musculus OX=10090 GN=Slc16a7 PE=1 SV=1	sp|O70451|MOT2_MOUSE Monocarboxylate transporter 2 OS=Mus musculus OX=10090 GN=Slc16a7 PE=1 SV=1	581869	896811	1503061	2095067	198594	730790	573497	1556254	1706144	199171	625899	1314481	1054141	2264801	986959	1014481	460460	1714152	2744328	1495793	2515282	2409093	1527144	3946009	1399020	1550030	2126243	2108718	4094198	1114140	1178787	1735868	3742219	916362	1889839	1802826	2893690	1578441
O70456	1433S_MOUSE 14-3-3 protein sigma OS=Mus musculus OX=10090 GN=Sfn PE=1 SV=2	Sfn	sp|O70456|1433S_MOUSE 14-3-3 protein sigma OS=Mus musculus OX=10090 GN=Sfn PE=1 SV=2	sp|O70456|1433S_MOUSE 14-3-3 protein sigma OS=Mus musculus OX=10090 GN=Sfn PE=1 SV=2	10588.5	1273903	1389327	1473944	655470	706814	855643	1080348	2147358	597616	777398	377764	1060428	1873746	619251	735500	1446500	826617	2691368	506505	553128	1059958	861493	1988460	420360	854085	1131146	2640117	2689808	449578	632120	1495468	1871427	770508	127132	1709037	1405451	2330872
O70475	UGDH_MOUSE UDP-glucose 6-dehydrogenase OS=Mus musculus OX=10090 GN=Ugdh PE=1 SV=1	Ugdh	sp|O70475|UGDH_MOUSE UDP-glucose 6-dehydrogenase OS=Mus musculus OX=10090 GN=Ugdh PE=1 SV=1	sp|O70475|UGDH_MOUSE UDP-glucose 6-dehydrogenase OS=Mus musculus OX=10090 GN=Ugdh PE=1 SV=1	65109150	59115760	110233000	104672700	60459240	56912420	63843640	78012330	82950120	59647640	93090420	134556100	93034830	44105250	48070440	62383900	126453400	50511980	78393910	23312660	50377340	101663900	64056310	43138380	24233790	31415900	79292460	50389340	50786760	29763490	40488590	90051240	69241790	16747420	38074030	34770400	54399960	42401510
O70480	VAMP4_MOUSE Vesicle-associated membrane protein 4 OS=Mus musculus OX=10090 GN=Vamp4 PE=1 SV=1	Vamp4	sp|O70480|VAMP4_MOUSE Vesicle-associated membrane protein 4 OS=Mus musculus OX=10090 GN=Vamp4 PE=1 SV=1	sp|O70480|VAMP4_MOUSE Vesicle-associated membrane protein 4 OS=Mus musculus OX=10090 GN=Vamp4 PE=1 SV=1	80710.2	80644.5	114598	90109.2	155552	163584	106352	151097	61143.7	127699	75204.5	37481.2	75861.2	73626.1	66114.9	65389.4	164038	44039.4	123314	29885.1	66319.4	165175	89678.3	0	79280.9	25159.3	193737	106406	147180	5507.32	6046.56	86150.5	187957	17201.3	95176.6	144578	2408.43	108766
O70492	SNX3_MOUSE Sorting nexin-3 OS=Mus musculus OX=10090 GN=Snx3 PE=1 SV=3	Snx3	sp|O70492|SNX3_MOUSE Sorting nexin-3 OS=Mus musculus OX=10090 GN=Snx3 PE=1 SV=3	sp|O70492|SNX3_MOUSE Sorting nexin-3 OS=Mus musculus OX=10090 GN=Snx3 PE=1 SV=3	55086660	35201240	39353220	32471490	70889380	48240950	65596290	55447590	63586130	89915590	50199550	41141190	48188180	10698630	58883590	33436800	49382930	47916680	65300010	15285430	13358680	27344630	6421525	11478960	4055039	3765344	4809314	7366698	4978442	5845856	11880450	9904269	11336750	6096478	7819817	6370646	5602318	5733439
O70496	CLCN7_MOUSE H(+)/Cl(-) exchange transporter 7 OS=Mus musculus OX=10090 GN=Clcn7 PE=1 SV=1	Clcn7	sp|O70496|CLCN7_MOUSE H(+)/Cl(-) exchange transporter 7 OS=Mus musculus OX=10090 GN=Clcn7 PE=1 SV=1	sp|O70496|CLCN7_MOUSE H(+)/Cl(-) exchange transporter 7 OS=Mus musculus OX=10090 GN=Clcn7 PE=1 SV=1	780773	764425	822550	1146517	940181	798594	884680	1015339	763370	1245562	1389536	1073241	485054	817492	1133340	704371	764170	757089	680141	678761	1212469	742407	1466987	1114501	1309553	675624	2552500	1891672	1185020	807171	861265	1695010	1101597	1279732	1271181	1925231	1375361	1513159
O70503	DHB12_MOUSE Very-long-chain 3-oxoacyl-CoA reductase OS=Mus musculus OX=10090 GN=Hsd17b12 PE=1 SV=1	Hsd17b12	sp|O70503|DHB12_MOUSE Very-long-chain 3-oxoacyl-CoA reductase OS=Mus musculus OX=10090 GN=Hsd17b12 PE=1 SV=1	sp|O70503|DHB12_MOUSE Very-long-chain 3-oxoacyl-CoA reductase OS=Mus musculus OX=10090 GN=Hsd17b12 PE=1 SV=1	209752800	270525400	415831600	417554600	171540800	246444900	357376800	422513100	373103900	178100700	298024300	334285400	348039700	333871000	223163600	272994200	391719900	291724200	397429700	116449200	208141800	359256500	443885700	388112600	190444300	230303700	726836700	600945800	422080000	190420900	235473200	481020100	634796100	291093300	247196100	541007100	302036000	327656700
O70570	PIGR_MOUSE Polymeric immunoglobulin receptor OS=Mus musculus OX=10090 GN=Pigr PE=1 SV=1	Pigr	sp|O70570|PIGR_MOUSE Polymeric immunoglobulin receptor OS=Mus musculus OX=10090 GN=Pigr PE=1 SV=1	sp|O70570|PIGR_MOUSE Polymeric immunoglobulin receptor OS=Mus musculus OX=10090 GN=Pigr PE=1 SV=1	77393300	100855200	89353250	81403950	138914300	88594210	90657380	142417200	167319300	127350500	135560900	88863190	91056610	64116410	72235050	205747900	98306840	103760300	247632400	14181740	46472220	85811990	81757220	91083410	16236100	41347150	80229670	57658690	90389030	18976200	40915730	102308200	132885600	26102710	47684280	94216360	96626440	59699400
O70571	PDK4_MOUSE [Pyruvate dehydrogenase (acetyl-transferring)] kinase isozyme 4, mitochondrial OS=Mus musculus OX=10090 GN=Pdk4 PE=1 SV=1	Pdk4	sp|O70571|PDK4_MOUSE [Pyruvate dehydrogenase (acetyl-transferring)] kinase isozyme 4, mitochondrial OS=Mus musculus OX=10090 GN=Pdk4 PE=1 SV=1	sp|O70571|PDK4_MOUSE [Pyruvate dehydrogenase (acetyl-transferring)] kinase isozyme 4, mitochondrial OS=Mus musculus OX=10090 GN=Pdk4 PE=1 SV=1	12332720	1091275	2365582	889972	25237850	9290529	1481657	15710050	20945680	16436950	4342169	812012	1379619	1409528	7566238	4381512	737366	7258629	2471394	2420712	960960	1880279	2455099	1068851	1566968	4443797	7005059	6231230	4478033	1650959	9280936	2411088	1092333	8609700	16978860	875220	4846451	2886173
O70572	NSMA_MOUSE Sphingomyelin phosphodiesterase 2 OS=Mus musculus OX=10090 GN=Smpd2 PE=1 SV=1	Smpd2	sp|O70572|NSMA_MOUSE Sphingomyelin phosphodiesterase 2 OS=Mus musculus OX=10090 GN=Smpd2 PE=1 SV=1	sp|O70572|NSMA_MOUSE Sphingomyelin phosphodiesterase 2 OS=Mus musculus OX=10090 GN=Smpd2 PE=1 SV=1	4976448	5454272	8093695	5910239	13484120	5100548	5511848	7354236	6345013	3701794	5241864	3602855	4914299	5285614	9897877	4429996	5841659	5881606	5061196	1931077	3877919	6900507	8686783	6264714	3707790	4118182	9549800	7678423	8510377	2214749	4106411	5189204	10415240	2733040	2468164	7330817	5831982	4574932
O70577	S22A2_MOUSE Solute carrier family 22 member 2 OS=Mus musculus OX=10090 GN=Slc22a2 PE=1 SV=1	Slc22a2	sp|O70577|S22A2_MOUSE Solute carrier family 22 member 2 OS=Mus musculus OX=10090 GN=Slc22a2 PE=1 SV=1	sp|O70577|S22A2_MOUSE Solute carrier family 22 member 2 OS=Mus musculus OX=10090 GN=Slc22a2 PE=1 SV=1	1905037	1746532	1327896	1434443	2927950	2147756	1954433	1484611	372071	4467617	2373296	1677617	2597372	397100	2055359	799200	1322688	538788	514185	31280870	849466	419738	36111.3	931958	672102	553982	293836	1114185	507105	1568790	272846	49130.5	328155	538200	511966	89181.6	102121	1084692
O70579	PM34_MOUSE Peroxisomal membrane protein PMP34 OS=Mus musculus OX=10090 GN=Slc25a17 PE=1 SV=1	Slc25a17	sp|O70579|PM34_MOUSE Peroxisomal membrane protein PMP34 OS=Mus musculus OX=10090 GN=Slc25a17 PE=1 SV=1	sp|O70579|PM34_MOUSE Peroxisomal membrane protein PMP34 OS=Mus musculus OX=10090 GN=Slc25a17 PE=1 SV=1	97321070	64871890	159558500	181227700	78429300	75681410	91098410	120022300	114581700	96602250	95647850	102793700	166657100	115324900	115187700	84899290	88422880	126424800	129026400	110354600	99941170	145673500	145138100	130595300	178138300	126285000	288621800	194186700	157345900	108392900	84324610	149523500	146090600	141650000	147039700	169809300	164023000	175563600
O70585	DTNB_MOUSE Dystrobrevin beta OS=Mus musculus OX=10090 GN=Dtnb PE=1 SV=3	Dtnb	sp|O70585|DTNB_MOUSE Dystrobrevin beta OS=Mus musculus OX=10090 GN=Dtnb PE=1 SV=3	sp|O70585|DTNB_MOUSE Dystrobrevin beta OS=Mus musculus OX=10090 GN=Dtnb PE=1 SV=3	93656.9	98059.3	48013	208732	190361	36812.9	63235.1	58278.5	176480	313390	32704.3	276662	297155	123869	103069	156231	104676	73077.2	178646	93460.1	71518.6	247042	244737	153155	88743.6	165081	233236	221535	65148.6	21459.8	194925	229418	248229	183202	51492.5	196526	166395	78267.3
O70589	CSKP_MOUSE Peripheral plasma membrane protein CASK OS=Mus musculus OX=10090 GN=Cask PE=1 SV=2	Cask	sp|O70589|CSKP_MOUSE Peripheral plasma membrane protein CASK OS=Mus musculus OX=10090 GN=Cask PE=1 SV=2	sp|O70589|CSKP_MOUSE Peripheral plasma membrane protein CASK OS=Mus musculus OX=10090 GN=Cask PE=1 SV=2	10807290	8537443	8237480	8899100	4698115	6982475	5438730	6547828	7520784	10485310	9981900	16931800	10796070	12004260	6180943	8824113	8608651	10712200	9086546	16356140	10584720	15709360	11567130	15086280	9494192	8074585	13391560	16588190	17516420	9663716	9881372	13177590	22682750	9766607	15936520	7945395	14250940	10097830
O88338	CAD16_MOUSE Cadherin-16 OS=Mus musculus OX=10090 GN=Cdh16 PE=1 SV=1	Cdh16	sp|O88338|CAD16_MOUSE Cadherin-16 OS=Mus musculus OX=10090 GN=Cdh16 PE=1 SV=1	sp|O88338|CAD16_MOUSE Cadherin-16 OS=Mus musculus OX=10090 GN=Cdh16 PE=1 SV=1	18075590	1768583	1721525	1671304	1133757	1501298	2513159	1935252	1112738	1415031	3693391	2979540	2322437	1031731	1165544	1201557	1952132	2608913	1455798	517713400	934810	1558607	2425288	2331750	1401718	2123194	2446550	2365941	1728117	1906462	1675715	2386214	2115968	1894171	1993260	2132277	2209687	1541195
O88342	WDR1_MOUSE WD repeat-containing protein 1 OS=Mus musculus OX=10090 GN=Wdr1 PE=1 SV=3	Wdr1	sp|O88342|WDR1_MOUSE WD repeat-containing protein 1 OS=Mus musculus OX=10090 GN=Wdr1 PE=1 SV=3	sp|O88342|WDR1_MOUSE WD repeat-containing protein 1 OS=Mus musculus OX=10090 GN=Wdr1 PE=1 SV=3	15155640	10348630	22004410	17284720	19309050	31061050	19747220	18405450	16506710	25082130	16379970	24190700	25278810	10874720	29746370	14837180	19573450	19329500	29156350	11066210	9544853	30924560	13429430	11339600	10591100	13008790	23104350	22009970	18836290	14628580	14461740	22773490	17663080	14680000	11853840	14077630	15432970	21322860
O88343	S4A4_MOUSE Electrogenic sodium bicarbonate cotransporter 1 OS=Mus musculus OX=10090 GN=Slc4a4 PE=1 SV=2	Slc4a4	sp|O88343|S4A4_MOUSE Electrogenic sodium bicarbonate cotransporter 1 OS=Mus musculus OX=10090 GN=Slc4a4 PE=1 SV=2	sp|O88343|S4A4_MOUSE Electrogenic sodium bicarbonate cotransporter 1 OS=Mus musculus OX=10090 GN=Slc4a4 PE=1 SV=2	34388570	31351050	26078070	30703430	15438580	24059450	21818800	33493500	32938010	22070810	36721260	41825610	27899610	36351720	25031680	35907430	19616030	36308880	35288960	135845200	37731120	49715000	34645140	52733310	19505960	23245820	38171010	38681720	56195800	15361290	34404850	42949770	87833130	24513440	29526270	25905790	47447080	22044360
O88351	IKKB_MOUSE Inhibitor of nuclear factor kappa-B kinase subunit beta OS=Mus musculus OX=10090 GN=Ikbkb PE=1 SV=1	Ikbkb	sp|O88351|IKKB_MOUSE Inhibitor of nuclear factor kappa-B kinase subunit beta OS=Mus musculus OX=10090 GN=Ikbkb PE=1 SV=1	sp|O88351|IKKB_MOUSE Inhibitor of nuclear factor kappa-B kinase subunit beta OS=Mus musculus OX=10090 GN=Ikbkb PE=1 SV=1	45610.2	509627	183830	26520.8	69122.1	90336.4	119122	1790599	62203.5	262364	124296	107440	778830	446614	53141.3	115238	139602	0	0	378704	325330	149387	577748	380721	198717	208712	541329	802362	635647	235428	19408.4	315990	33239.5	614530	609030	600090	322203	159356
O88384	VTI1B_MOUSE Vesicle transport through interaction with t-SNAREs homolog 1B OS=Mus musculus OX=10090 GN=Vti1b PE=1 SV=1	Vti1b	sp|O88384|VTI1B_MOUSE Vesicle transport through interaction with t-SNAREs homolog 1B OS=Mus musculus OX=10090 GN=Vti1b PE=1 SV=1	sp|O88384|VTI1B_MOUSE Vesicle transport through interaction with t-SNAREs homolog 1B OS=Mus musculus OX=10090 GN=Vti1b PE=1 SV=1	3851175	4230460	30178840	5644241	4674698	7835269	3909971	5164593	4573682	4655894	4111825	2366001	3992119	7186861	5892187	7094419	7560334	4335390	7062276	53275170	4660390	3531734	6408910	6076830	4080402	4921399	7913817	6144168	6127273	2905989	28187410	7073582	8505034	4904165	2964796	7434399	7546186	7224250
O88428	PAPS2_MOUSE Bifunctional 3'-phosphoadenosine 5'-phosphosulfate synthase 2 OS=Mus musculus OX=10090 GN=Papss2 PE=1 SV=2	Papss2	sp|O88428|PAPS2_MOUSE Bifunctional 3'-phosphoadenosine 5'-phosphosulfate synthase 2 OS=Mus musculus OX=10090 GN=Papss2 PE=1 SV=2	sp|O88428|PAPS2_MOUSE Bifunctional 3'-phosphoadenosine 5'-phosphosulfate synthase 2 OS=Mus musculus OX=10090 GN=Papss2 PE=1 SV=2	142436300	161167800	156759700	111607200	123485700	146325600	170972900	184895300	149243600	124739100	158293100	263285200	175542300	84490870	84109530	145524500	194020000	108282700	180875000	52830840	107862700	240097800	132105300	117808200	42534590	79242070	111051300	135505500	125962100	49181640	80197970	138363300	213838900	38749180	100426900	109750700	119401900	56205860
O88441	MTX2_MOUSE Metaxin-2 OS=Mus musculus OX=10090 GN=Mtx2 PE=1 SV=1	Mtx2	sp|O88441|MTX2_MOUSE Metaxin-2 OS=Mus musculus OX=10090 GN=Mtx2 PE=1 SV=1	sp|O88441|MTX2_MOUSE Metaxin-2 OS=Mus musculus OX=10090 GN=Mtx2 PE=1 SV=1	35540620	33512520	36926280	28195920	54616130	33584270	26607090	37723050	20825860	37575550	32388640	28054700	29612370	9893020	40189590	27232960	26020990	29129790	21115720	60118800	29130650	34877420	37933540	14978310	36415710	29485810	31963890	36835380	19819770	29688780	43298680	31269810	33241440	31607680	35290050	24197310	34826600	15538230
O88451	RDH7_MOUSE Retinol dehydrogenase 7 OS=Mus musculus OX=10090 GN=Rdh7 PE=1 SV=1	Rdh7	sp|O88451|RDH7_MOUSE Retinol dehydrogenase 7 OS=Mus musculus OX=10090 GN=Rdh7 PE=1 SV=1	sp|O88451|RDH7_MOUSE Retinol dehydrogenase 7 OS=Mus musculus OX=10090 GN=Rdh7 PE=1 SV=1	1844022000	2206855000	2505367000	2096344000	1278691000	2015312000	2502299000	3362726000	3025770000	1748479000	2204942000	2869282000	2189978000	1899836000	1652689000	2429944000	2363607000	2670097000	2523217000	827351900	2195448000	4031705000	3806889000	3215552000	1119002000	2055912000	4259843000	2926681000	3516960000	1113507000	1682751000	2842179000	4527187000	1767344000	2603685000	4227386000	2527687000	2985372000
O88455	DHCR7_MOUSE 7-dehydrocholesterol reductase OS=Mus musculus OX=10090 GN=Dhcr7 PE=1 SV=1	Dhcr7	sp|O88455|DHCR7_MOUSE 7-dehydrocholesterol reductase OS=Mus musculus OX=10090 GN=Dhcr7 PE=1 SV=1	sp|O88455|DHCR7_MOUSE 7-dehydrocholesterol reductase OS=Mus musculus OX=10090 GN=Dhcr7 PE=1 SV=1	147245900	344302800	479444600	457402300	143957600	299511700	374990600	409780000	387547100	98436990	360304100	422917800	339825300	456823100	167837400	263763700	333748500	356498900	386680100	116024200	556144600	626701800	641111300	489894500	184046200	460840200	703384500	595184400	574714100	142927600	288528000	580996500	735049900	262640700	381705100	622204200	514360300	508123000
O88456	CPNS1_MOUSE Calpain small subunit 1 OS=Mus musculus OX=10090 GN=Capns1 PE=1 SV=1	Capns1	sp|O88456|CPNS1_MOUSE Calpain small subunit 1 OS=Mus musculus OX=10090 GN=Capns1 PE=1 SV=1	sp|O88456|CPNS1_MOUSE Calpain small subunit 1 OS=Mus musculus OX=10090 GN=Capns1 PE=1 SV=1	2593949	2224663	5312808	1919463	2148796	2425873	1796738	5723420	1627988	3436955	2923549	3452488	1106777	2086198	2101811	1178724	3094028	2160054	1739348	1262119	2004978	3699491	1306836	1860734	1869587	2680486	4546874	4090315	2584193	1912298	1384142	4421230	3947634	1943083	2626848	2160013	3271178	3447980
O88487	DC1I2_MOUSE Cytoplasmic dynein 1 intermediate chain 2 OS=Mus musculus OX=10090 GN=Dync1i2 PE=1 SV=1	Dync1i2	sp|O88487|DC1I2_MOUSE Cytoplasmic dynein 1 intermediate chain 2 OS=Mus musculus OX=10090 GN=Dync1i2 PE=1 SV=1	sp|O88487|DC1I2_MOUSE Cytoplasmic dynein 1 intermediate chain 2 OS=Mus musculus OX=10090 GN=Dync1i2 PE=1 SV=1	57772.3	1798263	1535712	56505.4	2940473	1121801	371736	101973	307449	4368887	3372032	1478485	676361	360266	2065968	1504703	2489882	3189840	134775	3065694	2591262	3377972	941349	303145	158162	2524960	2544914	0	252688	4518750	2674695	2616469	956679	3454748	4416679	5562.38	0	58516.4
O88520	SHOC2_MOUSE Leucine-rich repeat protein SHOC-2 OS=Mus musculus OX=10090 GN=Shoc2 PE=1 SV=2	Shoc2	sp|O88520|SHOC2_MOUSE Leucine-rich repeat protein SHOC-2 OS=Mus musculus OX=10090 GN=Shoc2 PE=1 SV=2	sp|O88520|SHOC2_MOUSE Leucine-rich repeat protein SHOC-2 OS=Mus musculus OX=10090 GN=Shoc2 PE=1 SV=2	201246	64639.8	10151.3	186671	68336.2	115969	72657	357046	0	142655	23082.9	142212	205558	387409	28865.5	12931.3	282812	278959	52783.2	342873	43750.4	349598	479568	415737	28550.9	453927	742858	845247	1090091	294020	34726	514291	492005	98977.9	187982	585074	383779	439930
O88531	PPT1_MOUSE Palmitoyl-protein thioesterase 1 OS=Mus musculus OX=10090 GN=Ppt1 PE=1 SV=2	Ppt1	sp|O88531|PPT1_MOUSE Palmitoyl-protein thioesterase 1 OS=Mus musculus OX=10090 GN=Ppt1 PE=1 SV=2	sp|O88531|PPT1_MOUSE Palmitoyl-protein thioesterase 1 OS=Mus musculus OX=10090 GN=Ppt1 PE=1 SV=2	64991660	71071670	77389390	59225160	69352870	64201080	87907220	90428040	62843130	88550540	90362240	117295800	76487790	43641120	71095860	66981510	106132500	49810230	59164460	63374940	90317500	40808950	83039790	52973670	62496470	51040320	66429650	62289860	59115170	49201940	67615930	42603620	103215600	63465460	76372660	66364470	67355110	52575190
O88533	DDC_MOUSE Aromatic-L-amino-acid decarboxylase OS=Mus musculus OX=10090 GN=Ddc PE=1 SV=1	Ddc	sp|O88533|DDC_MOUSE Aromatic-L-amino-acid decarboxylase OS=Mus musculus OX=10090 GN=Ddc PE=1 SV=1	sp|O88533|DDC_MOUSE Aromatic-L-amino-acid decarboxylase OS=Mus musculus OX=10090 GN=Ddc PE=1 SV=1	37506140	27063980	45613150	40020190	29968270	31146290	38544400	42207630	37227450	46535690	31532530	50148920	43526560	30740770	39467370	33072960	37046120	36043510	40891700	24801770	31353180	48262150	37382640	41624360	34699690	37396760	60534630	51017410	38241320	33058950	23769080	38323490	48620840	47771430	48169290	42614800	36229710	42163220
O88544	CSN4_MOUSE COP9 signalosome complex subunit 4 OS=Mus musculus OX=10090 GN=Cops4 PE=1 SV=1	Cops4	sp|O88544|CSN4_MOUSE COP9 signalosome complex subunit 4 OS=Mus musculus OX=10090 GN=Cops4 PE=1 SV=1	sp|O88544|CSN4_MOUSE COP9 signalosome complex subunit 4 OS=Mus musculus OX=10090 GN=Cops4 PE=1 SV=1	1939534	3295150	3240169	2683334	2455649	2038532	2437431	2545154	3139531	4607411	3602048	3433179	2511694	1992032	2724361	3509299	3248790	1843160	2699178	632279	1429698	3559029	1385994	1901050	1195355	1493541	1096844	1842844	2468918	898841	1831021	3466344	2977692	10067530	1818400	575393	1662207	1152760
O88569	ROA2_MOUSE Heterogeneous nuclear ribonucleoproteins A2/B1 OS=Mus musculus OX=10090 GN=Hnrnpa2b1 PE=1 SV=2	Hnrnpa2b1	sp|O88569|ROA2_MOUSE Heterogeneous nuclear ribonucleoproteins A2/B1 OS=Mus musculus OX=10090 GN=Hnrnpa2b1 PE=1 SV=2	sp|O88569|ROA2_MOUSE Heterogeneous nuclear ribonucleoproteins A2/B1 OS=Mus musculus OX=10090 GN=Hnrnpa2b1 PE=1 SV=2	40680560	20325380	37016970	8586203	17023880	17281990	30705590	18717330	20427580	8446759	37333010	13950800	38250640	6379655	24279890	25169280	31605730	14131090	20899670	2439292	7437256	4946470	2460683	5491045	1014437	911498	4734232	6559398	4194703	2017661	6420749	4327021	7191700	2191775	2120966	1575446	1843761	2616673
O88587	COMT_MOUSE Catechol O-methyltransferase OS=Mus musculus OX=10090 GN=Comt PE=1 SV=2	Comt	sp|O88587|COMT_MOUSE Catechol O-methyltransferase OS=Mus musculus OX=10090 GN=Comt PE=1 SV=2	sp|O88587|COMT_MOUSE Catechol O-methyltransferase OS=Mus musculus OX=10090 GN=Comt PE=1 SV=2	296911300	322679200	517250900	351335500	276897400	323708300	694789300	479723700	473088100	337122100	432722500	509574500	458617300	324090900	293625300	420290400	506908200	419497400	483577800	137314200	330174500	728600900	389435000	420736400	175635300	284695100	752247700	472392600	476768500	165107800	275399600	517944200	619077700	314308000	393743900	651678700	328657600	487272400
O88597	BECN1_MOUSE Beclin-1 OS=Mus musculus OX=10090 GN=Becn1 PE=1 SV=3	Becn1	sp|O88597|BECN1_MOUSE Beclin-1 OS=Mus musculus OX=10090 GN=Becn1 PE=1 SV=3	sp|O88597|BECN1_MOUSE Beclin-1 OS=Mus musculus OX=10090 GN=Becn1 PE=1 SV=3	135044	20996.8	242808	94851.5	146375	270892	242382	244836	95767.1	327908	119552	114757	229210	133781	176782	104719	152008	91215.2	28936.2	133874	321724	80189.4	181418	61468.5	153754	50751.4	138587	183719	117270	104657	135954	214247	311866	199571	63101.9	114913	299440	88829.5
O88623	UBP2_MOUSE Ubiquitin carboxyl-terminal hydrolase 2 OS=Mus musculus OX=10090 GN=Usp2 PE=1 SV=2	Usp2	sp|O88623|UBP2_MOUSE Ubiquitin carboxyl-terminal hydrolase 2 OS=Mus musculus OX=10090 GN=Usp2 PE=1 SV=2	sp|O88623|UBP2_MOUSE Ubiquitin carboxyl-terminal hydrolase 2 OS=Mus musculus OX=10090 GN=Usp2 PE=1 SV=2	387917	240298	309532	313078	484037	205727	302508	58900.5	110710	339993	339782	451146	220082	228661	627718	309067	374581	153018	209512	823029	460324	537632	48517.7	252660	152089	157796	296247	456985	207550	365580	229099	379396	468886	241348	171605	323466	189805	115596
O88630	GOSR1_MOUSE Golgi SNAP receptor complex member 1 OS=Mus musculus OX=10090 GN=Gosr1 PE=1 SV=2	Gosr1	sp|O88630|GOSR1_MOUSE Golgi SNAP receptor complex member 1 OS=Mus musculus OX=10090 GN=Gosr1 PE=1 SV=2	sp|O88630|GOSR1_MOUSE Golgi SNAP receptor complex member 1 OS=Mus musculus OX=10090 GN=Gosr1 PE=1 SV=2	625835	1585841	482946	1592641	2783832	1441488	971696	903453	1448459	2752757	1830260	1231974	1005507	1449739	825004	1741708	1837500	526221	1713247	513213	629660	1422963	1532971	7231400	857966	1228706	970523	9110101	340279	2616592	1594624	1062317	1189136	356710	476428	1274831	2619547	319761
O88653	LTOR3_MOUSE Ragulator complex protein LAMTOR3 OS=Mus musculus OX=10090 GN=Lamtor3 PE=1 SV=1	Lamtor3	sp|O88653|LTOR3_MOUSE Ragulator complex protein LAMTOR3 OS=Mus musculus OX=10090 GN=Lamtor3 PE=1 SV=1	sp|O88653|LTOR3_MOUSE Ragulator complex protein LAMTOR3 OS=Mus musculus OX=10090 GN=Lamtor3 PE=1 SV=1	914764	2758899	2435294	3412004	2193583	2069123	4244450	5262364	3006355	3062646	2338288	3524637	2991180	1641821	4684866	3914658	4776451	3545857	3157670	1930826	3930192	4131683	3173380	2825415	1092204	2712318	3662828	2807371	3520247	2212406	2249809	3634258	4136213	1160646	2711392	3622219	2117911	1391838
O88685	PRS6A_MOUSE 26S proteasome regulatory subunit 6A OS=Mus musculus OX=10090 GN=Psmc3 PE=1 SV=2	Psmc3	sp|O88685|PRS6A_MOUSE 26S proteasome regulatory subunit 6A OS=Mus musculus OX=10090 GN=Psmc3 PE=1 SV=2	sp|O88685|PRS6A_MOUSE 26S proteasome regulatory subunit 6A OS=Mus musculus OX=10090 GN=Psmc3 PE=1 SV=2	15320680	13318240	14662380	10806460	16876210	11022320	13775740	10694290	15051090	22705970	17963060	15628020	12769710	6587387	10608940	17364530	14015680	5844944	16307830	2552623	5662079	14059220	5400682	6212812	2666549	2506154	5558107	5682426	7627805	4718467	8027981	13154790	13421780	2497628	3554518	3747581	2987825	3458179
O88696	CLPP_MOUSE ATP-dependent Clp protease proteolytic subunit, mitochondrial OS=Mus musculus OX=10090 GN=Clpp PE=1 SV=1	Clpp	sp|O88696|CLPP_MOUSE ATP-dependent Clp protease proteolytic subunit, mitochondrial OS=Mus musculus OX=10090 GN=Clpp PE=1 SV=1	sp|O88696|CLPP_MOUSE ATP-dependent Clp protease proteolytic subunit, mitochondrial OS=Mus musculus OX=10090 GN=Clpp PE=1 SV=1	75015280	46139760	35682510	19370650	76524420	45045780	28460230	47443480	18767280	86742880	47816660	38437650	30467320	9453282	60857310	30399320	32155560	26113660	20651170	62997190	20987740	35544520	16266090	9520549	30495970	22939010	26845710	21612830	9844564	37759260	37671720	20707070	17303930	33606510	20363110	17935170	20898680	7765597
O88697	STK16_MOUSE Serine/threonine-protein kinase 16 OS=Mus musculus OX=10090 GN=Stk16 PE=1 SV=3	Stk16	sp|O88697|STK16_MOUSE Serine/threonine-protein kinase 16 OS=Mus musculus OX=10090 GN=Stk16 PE=1 SV=3	sp|O88697|STK16_MOUSE Serine/threonine-protein kinase 16 OS=Mus musculus OX=10090 GN=Stk16 PE=1 SV=3	74495.6	123721	132319	128008	128301	20193.6	152458	66039.6	60539.5	161632	152863	185447	86361.8	156589	59352.2	26965.6	275774	130284	119848	65146.1	110057	140008	68563.7	106302	42509.3	64717.1	236930	319642	152058	17695.7	165440	165763	302795	115728	66177.1	189499	111540	110782
O88736	DHB7_MOUSE 3-keto-steroid reductase OS=Mus musculus OX=10090 GN=Hsd17b7 PE=1 SV=1	Hsd17b7	sp|O88736|DHB7_MOUSE 3-keto-steroid reductase OS=Mus musculus OX=10090 GN=Hsd17b7 PE=1 SV=1	sp|O88736|DHB7_MOUSE 3-keto-steroid reductase OS=Mus musculus OX=10090 GN=Hsd17b7 PE=1 SV=1	40233030	37430650	59506940	48617850	42596980	29926180	65247840	53585910	36295600	37902070	46541260	62021600	50054800	49341840	43314460	37348060	55870170	48411490	49610030	34620580	43556350	62338710	68524660	48108770	50561750	52705290	94671900	75508190	64002880	31644800	35022280	71102500	93196880	51261540	46454980	77807210	58006650	52797320
O88746	TOM1_MOUSE Target of Myb protein 1 OS=Mus musculus OX=10090 GN=Tom1 PE=1 SV=1	Tom1	sp|O88746|TOM1_MOUSE Target of Myb protein 1 OS=Mus musculus OX=10090 GN=Tom1 PE=1 SV=1	sp|O88746|TOM1_MOUSE Target of Myb protein 1 OS=Mus musculus OX=10090 GN=Tom1 PE=1 SV=1	2056558	1642405	2906583	1559603	2591000	2888183	2535787	2560871	3951281	2215488	2825095	1175406	1661581	2745522	2986841	2956033	1010895	2641060	3694908	1299229	1627647	3120595	1567934	4457362	993946	3181058	1740901	1968643	4890266	1090047	2443484	2206431	1918001	1230119	1002044	1855049	3781021	1791643
O88783	FA5_MOUSE Coagulation factor V OS=Mus musculus OX=10090 GN=F5 PE=1 SV=1	F5	sp|O88783|FA5_MOUSE Coagulation factor V OS=Mus musculus OX=10090 GN=F5 PE=1 SV=1	sp|O88783|FA5_MOUSE Coagulation factor V OS=Mus musculus OX=10090 GN=F5 PE=1 SV=1	5829364	7154974	14146770	7234482	5977253	13074410	17761950	18412950	13519150	5661551	8657856	6411936	13268120	14431760	8748558	13506470	11984720	17938030	22676130	3142590	6914758	12352700	11766740	13723370	3993899	5198956	24690480	15938130	15101000	3174098	6535237	8128784	17458820	4682552	8973895	11041010	9567463	13832120
O88792	JAM1_MOUSE Junctional adhesion molecule A OS=Mus musculus OX=10090 GN=F11r PE=1 SV=2	F11r	sp|O88792|JAM1_MOUSE Junctional adhesion molecule A OS=Mus musculus OX=10090 GN=F11r PE=1 SV=2	sp|O88792|JAM1_MOUSE Junctional adhesion molecule A OS=Mus musculus OX=10090 GN=F11r PE=1 SV=2	14143740	29462800	37480410	33252690	20040230	29762150	30269930	41523620	26173280	17928710	31421730	22599320	33954450	35544170	26218350	32170990	31913390	26795920	33520390	20286970	26820850	17529890	33620910	28336410	16712800	15198790	33484420	44261500	39023200	14983010	24309230	26583610	61180560	18442040	22975010	26263840	31906740	24731500
O88829	SIAT9_MOUSE Lactosylceramide alpha-2,3-sialyltransferase OS=Mus musculus OX=10090 GN=St3gal5 PE=2 SV=2	St3gal5	sp|O88829|SIAT9_MOUSE Lactosylceramide alpha-2,3-sialyltransferase OS=Mus musculus OX=10090 GN=St3gal5 PE=2 SV=2	sp|O88829|SIAT9_MOUSE Lactosylceramide alpha-2,3-sialyltransferase OS=Mus musculus OX=10090 GN=St3gal5 PE=2 SV=2	10039640	20757270	19201380	20449750	21425560	14882540	33098930	45017700	17724300	16431590	21121030	19206820	197054000	21103650	16164910	26078560	21428730	30847680	27380920	9746650	24975370	34506200	36089480	27765610	10373860	29282750	45312750	62786650	56993590	12020530	16802200	26787480	44357290	23293570	34793770	51951790	31830560	42725930
O88833	CP4AA_MOUSE Cytochrome P450 4A10 OS=Mus musculus OX=10090 GN=Cyp4a10 PE=2 SV=2	Cyp4a10	sp|O88833|CP4AA_MOUSE Cytochrome P450 4A10 OS=Mus musculus OX=10090 GN=Cyp4a10 PE=2 SV=2	sp|O88833|CP4AA_MOUSE Cytochrome P450 4A10 OS=Mus musculus OX=10090 GN=Cyp4a10 PE=2 SV=2	79799900	95321180	62615710	177960400	70314890	71721830	152976500	300338200	200969500	67091990	100946300	173239000	65259880	72529810	102390000	140805500	116771000	222496600	156615800	91142130	79999040	262564600	195626500	279708000	72618420	151933700	154788000	127189200	382032200	47686740	51634640	173584700	293055200	121220300	124656700	185762900	253061400	155365200
O88844	IDHC_MOUSE Isocitrate dehydrogenase [NADP] cytoplasmic OS=Mus musculus OX=10090 GN=Idh1 PE=1 SV=2	Idh1	sp|O88844|IDHC_MOUSE Isocitrate dehydrogenase [NADP] cytoplasmic OS=Mus musculus OX=10090 GN=Idh1 PE=1 SV=2	sp|O88844|IDHC_MOUSE Isocitrate dehydrogenase [NADP] cytoplasmic OS=Mus musculus OX=10090 GN=Idh1 PE=1 SV=2	1472155000	1382937000	1728206000	1748641000	1388597000	1424541000	1829872000	1966870000	1664650000	1507360000	1741337000	2377375000	2287086000	1092642000	1485815000	1940158000	1632558000	1866060000	1895452000	708826900	1203752000	1135695000	982122300	1176136000	602653200	770319800	693183100	684903600	770849400	757519100	940005100	897478200	1239481000	468808800	788062500	535313400	746109800	668079500
O88851	RBBP9_MOUSE Putative hydrolase RBBP9 OS=Mus musculus OX=10090 GN=Rbbp9 PE=1 SV=2	Rbbp9	sp|O88851|RBBP9_MOUSE Putative hydrolase RBBP9 OS=Mus musculus OX=10090 GN=Rbbp9 PE=1 SV=2	sp|O88851|RBBP9_MOUSE Putative hydrolase RBBP9 OS=Mus musculus OX=10090 GN=Rbbp9 PE=1 SV=2	522095	599820	643349	576127	981614	801419	538634	877732	485915	297854	192762	499965	581020	407101	538528	458436	442500	36812.7	302911	769420	703008	865378	796280	213477	256687	661422	698792	663033	768116	739804	420612	713099	369422	351853	373628	223464	438015	274135
O88856	TPST2_MOUSE Protein-tyrosine sulfotransferase 2 OS=Mus musculus OX=10090 GN=Tpst2 PE=1 SV=1	Tpst2	sp|O88856|TPST2_MOUSE Protein-tyrosine sulfotransferase 2 OS=Mus musculus OX=10090 GN=Tpst2 PE=1 SV=1	sp|O88856|TPST2_MOUSE Protein-tyrosine sulfotransferase 2 OS=Mus musculus OX=10090 GN=Tpst2 PE=1 SV=1	332654	142473	245494	222592	272189	189916	62621.8	518913	341924	649526	461348	138353	312543	139422	56880.2	224820	90208.1	241687	188045	59517.3	354976	442520	428787	300149	112518	197736	119547	289044	449008	110107	317670	269085	758057	299926	95690	697743	178453	420417
O88876	DHRS3_MOUSE Short-chain dehydrogenase/reductase 3 OS=Mus musculus OX=10090 GN=Dhrs3 PE=1 SV=2	Dhrs3	sp|O88876|DHRS3_MOUSE Short-chain dehydrogenase/reductase 3 OS=Mus musculus OX=10090 GN=Dhrs3 PE=1 SV=2	sp|O88876|DHRS3_MOUSE Short-chain dehydrogenase/reductase 3 OS=Mus musculus OX=10090 GN=Dhrs3 PE=1 SV=2	1807222	2042919	3647870	2204637	2820790	1138873	2249555	3449874	1355058	2893223	1781604	1299792	1758732	1726139	2063406	2265806	2865422	2757539	3120030	1755011	1634002	3599431	1675364	3267843	1567646	1586907	2630664	1357580	1640880	1806787	1505802	3074057	5430722	2885454	1385229	2908671	1585147	352206
O88908	SOAT2_MOUSE Sterol O-acyltransferase 2 OS=Mus musculus OX=10090 GN=Soat2 PE=1 SV=2	Soat2	sp|O88908|SOAT2_MOUSE Sterol O-acyltransferase 2 OS=Mus musculus OX=10090 GN=Soat2 PE=1 SV=2	sp|O88908|SOAT2_MOUSE Sterol O-acyltransferase 2 OS=Mus musculus OX=10090 GN=Soat2 PE=1 SV=2	44323160	150041500	179342400	123483000	61801560	135382100	146769100	160889900	156376700	35805590	188493000	149336100	141620100	149266300	79237110	151674600	165525700	130323500	133837700	32769120	230716700	197280000	287848300	185014700	49392310	114340900	329913600	203648800	262240800	57417490	155654500	144055000	373957800	144104700	231191900	226518900	152196400	213505300
O88947	FA10_MOUSE Coagulation factor X OS=Mus musculus OX=10090 GN=F10 PE=1 SV=1	F10	sp|O88947|FA10_MOUSE Coagulation factor X OS=Mus musculus OX=10090 GN=F10 PE=1 SV=1	sp|O88947|FA10_MOUSE Coagulation factor X OS=Mus musculus OX=10090 GN=F10 PE=1 SV=1	10602780	7569097	9997892	6363013	8677413	12415770	10521800	8677098	7692430	24511130	12554230	9041623	6520623	10205800	11923290	13013330	12097220	6416634	7520033	1703568	11577160	9274783	9860098	5853139	1366979	3450843	6165773	8968025	7136176	1947512	6183719	7952683	17484080	2680513	5558596	6204939	5503467	6052287
O88958	GNPI1_MOUSE Glucosamine-6-phosphate isomerase 1 OS=Mus musculus OX=10090 GN=Gnpda1 PE=1 SV=3	Gnpda1	sp|O88958|GNPI1_MOUSE Glucosamine-6-phosphate isomerase 1 OS=Mus musculus OX=10090 GN=Gnpda1 PE=1 SV=3	sp|O88958|GNPI1_MOUSE Glucosamine-6-phosphate isomerase 1 OS=Mus musculus OX=10090 GN=Gnpda1 PE=1 SV=3	1492943	1397850	1547566	1127288	1633342	1439791	513221	1164475	1330595	921832	1783081	2586671	1500557	897734	1370950	934519	1458075	597742	1547505	820963	1199815	2055731	1522690	765017	512814	591181	1964606	2029147	2054666	982536	1451680	1471226	2644968	809323	583679	880481	1231146	717907
O88962	CP8B1_MOUSE 7-alpha-hydroxycholest-4-en-3-one 12-alpha-hydroxylase OS=Mus musculus OX=10090 GN=Cyp8b1 PE=1 SV=1	Cyp8b1	sp|O88962|CP8B1_MOUSE 7-alpha-hydroxycholest-4-en-3-one 12-alpha-hydroxylase OS=Mus musculus OX=10090 GN=Cyp8b1 PE=1 SV=1	sp|O88962|CP8B1_MOUSE 7-alpha-hydroxycholest-4-en-3-one 12-alpha-hydroxylase OS=Mus musculus OX=10090 GN=Cyp8b1 PE=1 SV=1	49135650	53832170	68784800	103982000	50599410	36523070	81398680	96930980	80184410	65822320	64661970	73599070	90608620	57961510	53158780	50993550	55718000	61752110	80833140	37025300	60781250	146227700	128998100	95189080	57307960	43169800	59814550	176091000	98712660	47883020	45691340	89748210	130634600	67411270	51753610	99666780	104903800	81828530
O88967	YMEL1_MOUSE ATP-dependent zinc metalloprotease YME1L1 OS=Mus musculus OX=10090 GN=Yme1l1 PE=1 SV=1	Yme1l1	sp|O88967|YMEL1_MOUSE ATP-dependent zinc metalloprotease YME1L1 OS=Mus musculus OX=10090 GN=Yme1l1 PE=1 SV=1	sp|O88967|YMEL1_MOUSE ATP-dependent zinc metalloprotease YME1L1 OS=Mus musculus OX=10090 GN=Yme1l1 PE=1 SV=1	11359030	6123796	9877532	5842692	11987690	7264266	7101254	8721417	5115926	11733300	8375695	7587735	8716535	3329035	10278870	7216964	5741824	5288075	5728368	10156990	6256362	8957269	5886083	4017530	11332250	7226218	11616860	8156141	3356834	8267027	9747720	9206017	6887586	10681090	6937968	6475703	6080675	4427142
O88968	TCO2_MOUSE Transcobalamin-2 OS=Mus musculus OX=10090 GN=Tcn2 PE=1 SV=1	Tcn2	sp|O88968|TCO2_MOUSE Transcobalamin-2 OS=Mus musculus OX=10090 GN=Tcn2 PE=1 SV=1	sp|O88968|TCO2_MOUSE Transcobalamin-2 OS=Mus musculus OX=10090 GN=Tcn2 PE=1 SV=1	664537	530800	1640945	1495852	1532010	1769451	1741991	2789940	1790526	1110504	183148	924250	682910	422149	469918	1884711	1710266	1395406	2766677	891608	716900	1413616	637298	290054	578070	241886	526739	438100	1243180	344084	237145	385030	1287793	755783	724506	572599	850123	1458467
O88983	STX8_MOUSE Syntaxin-8 OS=Mus musculus OX=10090 GN=Stx8 PE=1 SV=1	Stx8	sp|O88983|STX8_MOUSE Syntaxin-8 OS=Mus musculus OX=10090 GN=Stx8 PE=1 SV=1	sp|O88983|STX8_MOUSE Syntaxin-8 OS=Mus musculus OX=10090 GN=Stx8 PE=1 SV=1	1780016	2203720	3706524	3456577	4709441	2786609	4812705	3416889	1823063	4515378	2953714	2784878	3773784	2696503	5838569	2428861	7487013	2491949	3621551	2158603	3337812	3951211	3846201	3655103	2686954	3214507	5545142	4783042	3717606	1597517	2942327	2876739	6162092	5087309	3927720	2985618	4501819	2995462
O88986	KBL_MOUSE 2-amino-3-ketobutyrate coenzyme A ligase, mitochondrial OS=Mus musculus OX=10090 GN=Gcat PE=1 SV=2	Gcat	sp|O88986|KBL_MOUSE 2-amino-3-ketobutyrate coenzyme A ligase, mitochondrial OS=Mus musculus OX=10090 GN=Gcat PE=1 SV=2	sp|O88986|KBL_MOUSE 2-amino-3-ketobutyrate coenzyme A ligase, mitochondrial OS=Mus musculus OX=10090 GN=Gcat PE=1 SV=2	259316300	185716400	122539400	69083690	326342600	164712400	135956500	173402600	99527130	340805000	240862500	190589500	115991300	42287280	207390000	115623100	135525500	111767600	72445850	211280600	117912000	124515800	59696060	48100690	128063000	116384000	103444100	88759140	37765030	151180800	144225600	72129240	81406100	110814300	81594910	71662880	97058990	33358550
O89001	CBPD_MOUSE Carboxypeptidase D OS=Mus musculus OX=10090 GN=Cpd PE=1 SV=2	Cpd	sp|O89001|CBPD_MOUSE Carboxypeptidase D OS=Mus musculus OX=10090 GN=Cpd PE=1 SV=2	sp|O89001|CBPD_MOUSE Carboxypeptidase D OS=Mus musculus OX=10090 GN=Cpd PE=1 SV=2	643870	604517	1421602	1218731	1451999	1422286	1588202	1425213	2007928	1209661	1096383	1130233	1524629	874700	638262	1900360	1095890	1360855	1824107	450840	214398	2363176	782172	757814	109002	337796	765380	776401	911099	56198.9	82015.7	2145058	902783	67443.5	513047	1702029	1084753	693311
O89013	OBRG_MOUSE Leptin receptor gene-related protein OS=Mus musculus OX=10090 GN=Leprot PE=1 SV=1	Leprot	sp|O89013|OBRG_MOUSE Leptin receptor gene-related protein OS=Mus musculus OX=10090 GN=Leprot PE=1 SV=1	sp|O89013|OBRG_MOUSE Leptin receptor gene-related protein OS=Mus musculus OX=10090 GN=Leprot PE=1 SV=1	343073	422476	650709	426036	278641	333323	472193	306564	189923	446697	695990	379238	261697	782832	411337	219014	533489	250159	365674	387764	819759	640178	968712	352075	461204	540534	1468584	1289174	638482	75156.2	363550	269444	1236979	645595	1166106	974601	811575	1022387
O89016	ABCD4_MOUSE ATP-binding cassette sub-family D member 4 OS=Mus musculus OX=10090 GN=Abcd4 PE=1 SV=2	Abcd4	sp|O89016|ABCD4_MOUSE ATP-binding cassette sub-family D member 4 OS=Mus musculus OX=10090 GN=Abcd4 PE=1 SV=2	sp|O89016|ABCD4_MOUSE ATP-binding cassette sub-family D member 4 OS=Mus musculus OX=10090 GN=Abcd4 PE=1 SV=2	229517	133471	166138	261035	36693.1	127016	162433	111925	174003	260586	297664	237544	213040	240443	101828	341012	168151	83559.1	201295	49188.3	144936	27796.9	141388	176284	328441	111408	99406.8	158465	104906	52731.7	77812.6	78906.2	417442	83688.9	144614	95872.5	132948	252496
O89017	LGMN_MOUSE Legumain OS=Mus musculus OX=10090 GN=Lgmn PE=1 SV=1	Lgmn	sp|O89017|LGMN_MOUSE Legumain OS=Mus musculus OX=10090 GN=Lgmn PE=1 SV=1	sp|O89017|LGMN_MOUSE Legumain OS=Mus musculus OX=10090 GN=Lgmn PE=1 SV=1	31312450	40224200	142197900	97176280	35613660	35159250	64630100	81064130	36038250	47362030	51152860	97223990	59006290	109783900	32659570	32202900	141907100	43353430	32384440	57834880	121119200	125221800	167163900	88798620	86828740	81116750	332596200	224753500	110613700	39403370	75338340	172236000	191644500	91304390	128231600	183625600	205607000	272272800
O89020	AFAM_MOUSE Afamin OS=Mus musculus OX=10090 GN=Afm PE=1 SV=2	Afm	sp|O89020|AFAM_MOUSE Afamin OS=Mus musculus OX=10090 GN=Afm PE=1 SV=2	sp|O89020|AFAM_MOUSE Afamin OS=Mus musculus OX=10090 GN=Afm PE=1 SV=2	1604300	4810930	7306365	6830547	1887676	1833170	4563143	8719129	3623540	1959063	6015201	3295501	14855060	7659107	2375436	4817342	3694019	10775650	3587197	1544933	10628160	4302868	5299706	5970871	2298699	1789068	7293332	5467709	7461319	1327549	6179525	3460822	14669550	3113822	3638402	6044311	3367414	3947053
O89023	TPP1_MOUSE Tripeptidyl-peptidase 1 OS=Mus musculus OX=10090 GN=Tpp1 PE=1 SV=2	Tpp1	sp|O89023|TPP1_MOUSE Tripeptidyl-peptidase 1 OS=Mus musculus OX=10090 GN=Tpp1 PE=1 SV=2	sp|O89023|TPP1_MOUSE Tripeptidyl-peptidase 1 OS=Mus musculus OX=10090 GN=Tpp1 PE=1 SV=2	151041800	177811500	253998400	266949900	192197500	220637100	238836300	331829500	167227100	177291800	210236500	294980500	241188000	327486200	245645300	202173000	310221900	222005200	216317500	451703900	565187400	473459100	663637400	314032100	545570300	533774600	897159000	603140400	617931400	360456900	359511400	426945100	619702000	653705300	659708600	718876300	600298200	570228800
O89051	ITM2B_MOUSE Integral membrane protein 2B OS=Mus musculus OX=10090 GN=Itm2b PE=1 SV=1	Itm2b	sp|O89051|ITM2B_MOUSE Integral membrane protein 2B OS=Mus musculus OX=10090 GN=Itm2b PE=1 SV=1	sp|O89051|ITM2B_MOUSE Integral membrane protein 2B OS=Mus musculus OX=10090 GN=Itm2b PE=1 SV=1	63825900	47174830	78825200	53323100	138437400	138518300	117964300	162487600	104506900	96737050	73516530	29942720	50511870	22812630	134569100	146047300	63666810	133652600	173376000	12762750	24504860	32375300	29014240	26262080	17024460	17997130	46133840	37034900	33740170	13205380	14599780	19558440	40012330	18682160	21634100	36294610	29277480	40999870
O89053	COR1A_MOUSE Coronin-1A OS=Mus musculus OX=10090 GN=Coro1a PE=1 SV=5	Coro1a	sp|O89053|COR1A_MOUSE Coronin-1A OS=Mus musculus OX=10090 GN=Coro1a PE=1 SV=5	sp|O89053|COR1A_MOUSE Coronin-1A OS=Mus musculus OX=10090 GN=Coro1a PE=1 SV=5	2059549	2403233	5236681	2425570	2786171	2075280	3509711	2535264	1930687	4004010	2495977	2116026	3906225	1748009	2543617	1724573	3005054	1362467	2174183	1249924	1165236	2045992	1749491	1381198	1153317	1348297	3610740	3234173	1245109	1103174	1718154	1655344	1967202	1193741	2316053	1294257	2077724	2575630
O89079	COPE_MOUSE Coatomer subunit epsilon OS=Mus musculus OX=10090 GN=Cope PE=1 SV=3	Cope	sp|O89079|COPE_MOUSE Coatomer subunit epsilon OS=Mus musculus OX=10090 GN=Cope PE=1 SV=3	sp|O89079|COPE_MOUSE Coatomer subunit epsilon OS=Mus musculus OX=10090 GN=Cope PE=1 SV=3	1822597	1405665	2790276	3730990	2055864	1484923	4112141	2901946	2302109	3537341	2488922	3187536	2320296	1336362	1297810	2150907	2914639	2003858	5636852	2332398	1239799	2368844	2015965	1324784	671260	1113458	4395031	3010365	1521978	741362	2657027	3149761	2211554	1635258	2050956	3066482	2035421	1320402
O89112	LANC1_MOUSE Glutathione S-transferase LANCL1 OS=Mus musculus OX=10090 GN=Lancl1 PE=1 SV=1	Lancl1	sp|O89112|LANC1_MOUSE Glutathione S-transferase LANCL1 OS=Mus musculus OX=10090 GN=Lancl1 PE=1 SV=1	sp|O89112|LANC1_MOUSE Glutathione S-transferase LANCL1 OS=Mus musculus OX=10090 GN=Lancl1 PE=1 SV=1	740380	848475	4751892	5399846	606770	1741953	1478503	2039390	1961808	456243	1403431	2860456	1745658	1727743	591389	1456180	2462553	3424810	2791033	990738	992886	2349598	1481999	1846642	925198	1406987	2338475	2791778	3077285	774654	1361652	1713823	2653162	1216444	1651668	2713855	1962256	2065637
P00186	CP1A2_MOUSE Cytochrome P450 1A2 OS=Mus musculus OX=10090 GN=Cyp1a2 PE=1 SV=1	Cyp1a2	sp|P00186|CP1A2_MOUSE Cytochrome P450 1A2 OS=Mus musculus OX=10090 GN=Cyp1a2 PE=1 SV=1	sp|P00186|CP1A2_MOUSE Cytochrome P450 1A2 OS=Mus musculus OX=10090 GN=Cyp1a2 PE=1 SV=1	460199100	881808900	992576900	915080200	475339500	838995200	894265700	1343958000	894748900	512258100	766144600	1325240000	883268200	609329300	615507300	729036200	1091225000	758372900	871598000	213160500	808776100	1701295000	1425327000	1154447000	404301800	709441900	1831335000	1119489000	1191426000	333942100	684950200	1551825000	1852253000	590315000	824479100	1264401000	1099140000	1035427000
P00329	ADH1_MOUSE Alcohol dehydrogenase 1 OS=Mus musculus OX=10090 GN=Adh1 PE=1 SV=2	Adh1	sp|P00329|ADH1_MOUSE Alcohol dehydrogenase 1 OS=Mus musculus OX=10090 GN=Adh1 PE=1 SV=2	sp|P00329|ADH1_MOUSE Alcohol dehydrogenase 1 OS=Mus musculus OX=10090 GN=Adh1 PE=1 SV=2	4920216000	3378966000	3290736000	1839388000	4710542000	3192012000	3710556000	3483395000	4125219000	6402531000	6022748000	3726208000	3578983000	1466711000	3517531000	4388767000	3970895000	2477074000	4763405000	1065133000	1864843000	2469097000	1864511000	1616520000	1296444000	1270541000	1385712000	1665934000	1854385000	1372638000	1725980000	1970324000	2982260000	919663100	1877189000	1215660000	1512214000	873439200
P00375	DYR_MOUSE Dihydrofolate reductase OS=Mus musculus OX=10090 GN=Dhfr PE=1 SV=3	Dhfr	sp|P00375|DYR_MOUSE Dihydrofolate reductase OS=Mus musculus OX=10090 GN=Dhfr PE=1 SV=3	sp|P00375|DYR_MOUSE Dihydrofolate reductase OS=Mus musculus OX=10090 GN=Dhfr PE=1 SV=3	15624950	9678316	10686210	5558742	16974070	10612940	8471557	11071550	17229690	20968510	17047730	8608991	11368230	2496251	10521070	12022470	11434310	6402369	18209930	1698175	2023998	3507019	1328712	1962060	955295	1191256	1632678	1537261	1288646	2364970	3227876	3116784	2627443	886718	1521248	1636690	1433305	947112
P00397	COX1_MOUSE Cytochrome c oxidase subunit 1 OS=Mus musculus OX=10090 GN=Mtco1 PE=1 SV=2	Mtco1	sp|P00397|COX1_MOUSE Cytochrome c oxidase subunit 1 OS=Mus musculus OX=10090 GN=Mtco1 PE=1 SV=2	sp|P00397|COX1_MOUSE Cytochrome c oxidase subunit 1 OS=Mus musculus OX=10090 GN=Mtco1 PE=1 SV=2	26189230	20306290	37387070	24312090	13763870	22762660	12883900	37046370	21480440	24085610	25696500	13216520	19897070	12286360	37714930	20343670	6031377	27920540	20194650	31454660	26354110	34651460	32393120	19591360	43313800	24541880	40160040	37600270	17282930	28262990	26068400	17018630	23147490	31347980	29430500	37278000	31779680	15308250
P00405	COX2_MOUSE Cytochrome c oxidase subunit 2 OS=Mus musculus OX=10090 GN=Mtco2 PE=1 SV=1	Mtco2	sp|P00405|COX2_MOUSE Cytochrome c oxidase subunit 2 OS=Mus musculus OX=10090 GN=Mtco2 PE=1 SV=1	sp|P00405|COX2_MOUSE Cytochrome c oxidase subunit 2 OS=Mus musculus OX=10090 GN=Mtco2 PE=1 SV=1	4018906000	2802066000	3205858000	2180999000	3804574000	2540865000	2033110000	3193190000	1652932000	4098547000	2645247000	2825899000	2437603000	1396318000	3142031000	2170126000	2333433000	2219861000	1676868000	6132435000	2983131000	4260133000	3319804000	1711352000	5831157000	4395683000	5944947000	3837634000	2301798000	3537462000	3244455000	3562039000	2944259000	5019867000	3910873000	3589616000	3545028000	2718128000
P00493	HPRT_MOUSE Hypoxanthine-guanine phosphoribosyltransferase OS=Mus musculus OX=10090 GN=Hprt1 PE=1 SV=3	Hprt1	sp|P00493|HPRT_MOUSE Hypoxanthine-guanine phosphoribosyltransferase OS=Mus musculus OX=10090 GN=Hprt1 PE=1 SV=3	sp|P00493|HPRT_MOUSE Hypoxanthine-guanine phosphoribosyltransferase OS=Mus musculus OX=10090 GN=Hprt1 PE=1 SV=3	4233745	3372087	3747778	3139707	4711499	3640024	2570310	3216477	2821115	4788565	3051463	5092014	3429634	1727406	4651311	3582863	4392123	2547086	2939485	2687049	3564394	5668760	2747252	2177955	3495847	3381831	4233183	4779572	3566857	3338317	2291178	5690167	4854413	4463567	3938944	3631908	4035948	3156246
P00687	AMY1_MOUSE Alpha-amylase 1 OS=Mus musculus OX=10090 GN=Amy1 PE=1 SV=2	Amy1	sp|P00687|AMY1_MOUSE Alpha-amylase 1 OS=Mus musculus OX=10090 GN=Amy1 PE=1 SV=2	sp|P00687|AMY1_MOUSE Alpha-amylase 1 OS=Mus musculus OX=10090 GN=Amy1 PE=1 SV=2	1420359	3137650	3147701	3389411	2669352	3488010	3688957	6595638	2296283	5469864	2822634	4996568	2491304	2113251	2906009	1993330	3654076	3042898	2549612	1524080	4533226	4603901	6314213	3935940	1272061	3526251	6587148	4822438	4555639	1273053	1869082	4066288	9019215	2295438	3001262	3360452	4898128	2993210
P00688	AMYP_MOUSE Pancreatic alpha-amylase OS=Mus musculus OX=10090 GN=Amy2 PE=1 SV=2	Amy2	sp|P00688|AMYP_MOUSE Pancreatic alpha-amylase OS=Mus musculus OX=10090 GN=Amy2 PE=1 SV=2	sp|P00688|AMYP_MOUSE Pancreatic alpha-amylase OS=Mus musculus OX=10090 GN=Amy2 PE=1 SV=2	3411292	3043078	5668343	1991440	2926022	4574711	1079672	1491146	1423867	271830100	34247090	1736934	1263564	1651020	2683384	1635368	2212030	2941997	2138762	1893297	14250700	2276084	2876515	7754359	1910966	1989776	4685669	3147552	4020371	1509745	26907060	39320440	3181023	19478140	1934164	1298621	2169361	3771311
P00920	CAH2_MOUSE Carbonic anhydrase 2 OS=Mus musculus OX=10090 GN=Ca2 PE=1 SV=4	Ca2	sp|P00920|CAH2_MOUSE Carbonic anhydrase 2 OS=Mus musculus OX=10090 GN=Ca2 PE=1 SV=4	sp|P00920|CAH2_MOUSE Carbonic anhydrase 2 OS=Mus musculus OX=10090 GN=Ca2 PE=1 SV=4	10052940	20912160	2922195	1115941	3423024	1231653	1475424	1889648	4097422	5152517	2217043	2169437	2123774	581743	2757352	4719006	1814584	1620876	1495794	9697132	3057862	2039699	792033	1065840	575210	714734	878158	650000	1015902	2399350	1915190	989980	1695542	996091	389494	735763	1533916	588094
P01027	CO3_MOUSE Complement C3 OS=Mus musculus OX=10090 GN=C3 PE=1 SV=3	C3	sp|P01027|CO3_MOUSE Complement C3 OS=Mus musculus OX=10090 GN=C3 PE=1 SV=3	sp|P01027|CO3_MOUSE Complement C3 OS=Mus musculus OX=10090 GN=C3 PE=1 SV=3	1335057000	1377288000	1600392000	1283947000	968686300	1612301000	1944623000	2261273000	1430538000	1660062000	1315267000	1614544000	1596601000	1737808000	1943168000	1588998000	2090704000	1932322000	1859891000	528101400	1682178000	2119805000	2212873000	2063751000	681492100	1601408000	3463746000	2554791000	2439605000	651903400	1075491000	1806484000	3105021000	1731701000	1753320000	2923867000	2084108000	2479458000
P01029	CO4B_MOUSE Complement C4-B OS=Mus musculus OX=10090 GN=C4b PE=1 SV=3	C4b	sp|P01029|CO4B_MOUSE Complement C4-B OS=Mus musculus OX=10090 GN=C4b PE=1 SV=3	sp|P01029|CO4B_MOUSE Complement C4-B OS=Mus musculus OX=10090 GN=C4b PE=1 SV=3	214138700	199154200	469467000	313960400	383506400	455219900	441694100	445612400	346888400	379172200	274741200	210748600	393533000	299169800	421667800	385584600	349673000	394381700	515559000	56899680	217007800	301507200	264763000	251766600	73289010	180332500	443678100	482404800	342808300	95124410	145363600	266995600	355995900	171347600	252470300	371995400	310911400	421321600
P01592	IGJ_MOUSE Immunoglobulin J chain OS=Mus musculus OX=10090 GN=Jchain PE=1 SV=4	Jchain	sp|P01592|IGJ_MOUSE Immunoglobulin J chain OS=Mus musculus OX=10090 GN=Jchain PE=1 SV=4	sp|P01592|IGJ_MOUSE Immunoglobulin J chain OS=Mus musculus OX=10090 GN=Jchain PE=1 SV=4	4409343	12215180	9461817	9225404	8467456	5371610	9733763	16302400	13005430	6802608	14984260	3814169	5268932	5952674	4568848	10481970	7840528	9879148	9990046	620508	6345278	2549310	2596109	4415850	745873	956115	2030011	2962320	2812326	344812	6542833	3357922	14830700	145104	1620812	3082486	3789957	3293678
P01633	KV5A1_MOUSE Ig kappa chain V19-17 OS=Mus musculus OX=10090 GN=Igk-V19-17 PE=1 SV=1	Igk-V19-17	sp|P01633|KV5A1_MOUSE Ig kappa chain V19-17 OS=Mus musculus OX=10090 GN=Igk-V19-17 PE=1 SV=1	sp|P01633|KV5A1_MOUSE Ig kappa chain V19-17 OS=Mus musculus OX=10090 GN=Igk-V19-17 PE=1 SV=1	246390	4159252	4549006	12740070	2293760	797488	1257283	4162591	3923612	1150881	4537374	942410	2525013	2437335	1616470	1695380	1832045	1936867	2795578	1252956	2256005	1336717	1360912	1172586	815271	946490	4125360	1289250	5243752	309062	3662756	4148224	10775660	869352	523884	1265533	4767884	2446408
P01639	KV5A7_MOUSE Ig kappa chain V-V region MOPC 41 OS=Mus musculus OX=10090 GN=Gm5571 PE=1 SV=1	Gm5571	sp|P01639|KV5A7_MOUSE Ig kappa chain V-V region MOPC 41 OS=Mus musculus OX=10090 GN=Gm5571 PE=1 SV=1	sp|P01639|KV5A7_MOUSE Ig kappa chain V-V region MOPC 41 OS=Mus musculus OX=10090 GN=Gm5571 PE=1 SV=1	379036	1290436	314147	229895	450587	57721.2	154066	317799	0	99772.9	4130540	780369	333661	302195	63082.7	196289	711741	1984213	696835	113776	65434.1	102351	438627	248078	113137	91059.4	758958	251809	230821	369856	2483125	1624442	1684716	88161.1	151214	241137	429524	637711
P01645	KV5AC_MOUSE Ig kappa chain V-V region HP 93G7 OS=Mus musculus OX=10090 PE=1 SV=1	NoGeneName	sp|P01645|KV5AC_MOUSE Ig kappa chain V-V region HP 93G7 OS=Mus musculus OX=10090 PE=1 SV=1	sp|P01645|KV5AC_MOUSE Ig kappa chain V-V region HP 93G7 OS=Mus musculus OX=10090 PE=1 SV=1	981124	4026932	9576186	17384070	2998670	2916653	6623999	8103379	8423365	2771027	9108911	5421797	10534830	5576323	2049869	3513806	8838173	8162824	3672731	2284782	9671730	5481967	4574977	10530320	1015740	1529303	22675780	6856681	8332758	311599	12609880	17493970	21868880	2084950	2360943	11310230	6826641	39687030
P01786	HVM17_MOUSE Ig heavy chain V region MOPC 47A OS=Mus musculus OX=10090 PE=1 SV=1	NoGeneName	sp|P01786|HVM17_MOUSE Ig heavy chain V region MOPC 47A OS=Mus musculus OX=10090 PE=1 SV=1	sp|P01786|HVM17_MOUSE Ig heavy chain V region MOPC 47A OS=Mus musculus OX=10090 PE=1 SV=1	1032160	1341005	1570310	1020936	1101832	951609	1224257	858900	596007	1230957	1760612	1945963	1175705	1031784	1108603	1082218	1295616	1027405	573526	1147773	2836817	1642779	1742538	650024	1849950	1972975	2894532	1380607	910322	1039798	1121301	1187102	2250711	1447841	1948618	1056891	1624879	1495847
P01837	IGKC_MOUSE Immunoglobulin kappa constant OS=Mus musculus OX=10090 GN=Igkc PE=1 SV=2	Igkc	sp|P01837|IGKC_MOUSE Immunoglobulin kappa constant OS=Mus musculus OX=10090 GN=Igkc PE=1 SV=2	sp|P01837|IGKC_MOUSE Immunoglobulin kappa constant OS=Mus musculus OX=10090 GN=Igkc PE=1 SV=2	5110481	28177810	26783300	25329410	13198510	8287175	18433970	28700760	17788750	7064936	28585840	20266330	12816360	16525000	4076927	17185310	25619900	15404290	11340090	3275534	27216730	13860080	18411110	14458580	4562487	4678605	36089050	18641350	19029150	1576453	28991790	33311560	88596250	3275542	7104966	15221570	27135450	25641600
P01845	LAC3_MOUSE Ig lambda-3 chain C region OS=Mus musculus OX=10090 GN=Iglc3 PE=1 SV=1	Iglc3	sp|P01845|LAC3_MOUSE Ig lambda-3 chain C region OS=Mus musculus OX=10090 GN=Iglc3 PE=1 SV=1	sp|P01845|LAC3_MOUSE Ig lambda-3 chain C region OS=Mus musculus OX=10090 GN=Iglc3 PE=1 SV=1	495772	746845	570520	288332	255245	510829	223730	898287	579460	249757	1112220	428453	499215	367737	449550	539057	407780	404082	642814	175756	551239	405349	152052	413821	156715	200016	465368	165104	321012	193090	408007	283371	6676960	54111.3	363552	150261	726774	227355
P01867	IGG2B_MOUSE Ig gamma-2B chain C region OS=Mus musculus OX=10090 GN=Igh-3 PE=1 SV=3	Igh-3	sp|P01867|IGG2B_MOUSE Ig gamma-2B chain C region OS=Mus musculus OX=10090 GN=Igh-3 PE=1 SV=3	sp|P01867|IGG2B_MOUSE Ig gamma-2B chain C region OS=Mus musculus OX=10090 GN=Igh-3 PE=1 SV=3	3295049	32825660	43859400	61112620	4266813	5116859	15241470	33017270	16949910	4396972	32875140	22086490	18249940	31141950	2528456	14716310	38010790	25195690	7066751	3388994	69783590	26213140	48870240	26890790	2722432	5342477	74377790	24299120	33589880	2218083	47792360	71401260	533880100	6716466	8714171	33491220	57416480	45026890
P01869	IGH1M_MOUSE Ig gamma-1 chain C region, membrane-bound form OS=Mus musculus OX=10090 GN=Ighg1 PE=1 SV=2	Ighg1	sp|P01869|IGH1M_MOUSE Ig gamma-1 chain C region, membrane-bound form OS=Mus musculus OX=10090 GN=Ighg1 PE=1 SV=2	sp|P01869|IGH1M_MOUSE Ig gamma-1 chain C region, membrane-bound form OS=Mus musculus OX=10090 GN=Ighg1 PE=1 SV=2	3729962	11099730	2763984	2104132	3403200	5514948	2939430	4018796	4359395	4627487	16446320	13298000	2417856	2165513	3704458	2840990	2458112	2214737	3550520	4348319	22039420	16423130	5317962	8862281	1503319	1857576	6765900	5053018	4958297	1248612	8267381	6047371	15201890	3292705	3381969	2094281	3310878	3003989
P01872	IGHM_MOUSE Immunoglobulin heavy constant mu OS=Mus musculus OX=10090 GN=Ighm PE=1 SV=2	Ighm	sp|P01872|IGHM_MOUSE Immunoglobulin heavy constant mu OS=Mus musculus OX=10090 GN=Ighm PE=1 SV=2	sp|P01872|IGHM_MOUSE Immunoglobulin heavy constant mu OS=Mus musculus OX=10090 GN=Ighm PE=1 SV=2	79764160	461084200	322709600	493725200	177291800	65311920	167169800	451782200	282999100	66067120	530042700	246572100	132508500	612212800	47863620	254079300	196790600	279827800	62701430	27963460	670581100	175469500	352044400	164665400	44728440	59876310	259398300	434603300	335517300	22556340	591330900	384572400	2040673000	47201980	70830480	147862500	504786600	510627400
P01887	B2MG_MOUSE Beta-2-microglobulin OS=Mus musculus OX=10090 GN=B2m PE=1 SV=2	B2m	sp|P01887|B2MG_MOUSE Beta-2-microglobulin OS=Mus musculus OX=10090 GN=B2m PE=1 SV=2	sp|P01887|B2MG_MOUSE Beta-2-microglobulin OS=Mus musculus OX=10090 GN=B2m PE=1 SV=2	24128600	29751600	29326570	33743830	38536110	24295650	25074530	36336790	35106590	36638740	43899000	29384170	41025580	24772290	19682130	25532900	25721730	21012320	33421430	8364354	12977430	29357630	20981800	21016170	5415782	9502994	20294100	23751310	19990870	5858790	15478140	23096080	36895970	6875475	12156840	14942830	23082770	25249330
P01897	HA1L_MOUSE H-2 class I histocompatibility antigen, L-D alpha chain OS=Mus musculus OX=10090 GN=H2-L PE=1 SV=2	H2-L	sp|P01897|HA1L_MOUSE H-2 class I histocompatibility antigen, L-D alpha chain OS=Mus musculus OX=10090 GN=H2-L PE=1 SV=2	sp|P01897|HA1L_MOUSE H-2 class I histocompatibility antigen, L-D alpha chain OS=Mus musculus OX=10090 GN=H2-L PE=1 SV=2	107412900	112005500	428939200	320445700	161045400	144810200	170657800	186026600	130869200	129932600	174569000	241765500	306205100	283636200	108062100	114914100	317367300	109870500	162957500	61096250	120717200	198983300	142880800	118368600	74922020	87512390	425887900	436757800	132625000	80589260	105124900	290099700	246756300	91553850	114201400	207953200	179040600	339777600
P01898	HA10_MOUSE H-2 class I histocompatibility antigen, Q10 alpha chain OS=Mus musculus OX=10090 GN=H2-Q10 PE=1 SV=3	H2-Q10	sp|P01898|HA10_MOUSE H-2 class I histocompatibility antigen, Q10 alpha chain OS=Mus musculus OX=10090 GN=H2-Q10 PE=1 SV=3	sp|P01898|HA10_MOUSE H-2 class I histocompatibility antigen, Q10 alpha chain OS=Mus musculus OX=10090 GN=H2-Q10 PE=1 SV=3	22599470	47627140	72791480	78158680	42285980	64942580	80956060	76758770	58523870	26736000	47501700	56115340	53773870	105790900	43737680	64787040	70910010	57765390	69109480	13818170	87372020	107968900	99542110	80189950	40222520	77727880	157156000	119831600	87435360	17805630	46003030	85850060	129863300	47761880	78591790	102548700	75237990	98362550
P01901	HA1B_MOUSE H-2 class I histocompatibility antigen, K-B alpha chain OS=Mus musculus OX=10090 GN=H2-K1 PE=1 SV=1	H2-K1	sp|P01901|HA1B_MOUSE H-2 class I histocompatibility antigen, K-B alpha chain OS=Mus musculus OX=10090 GN=H2-K1 PE=1 SV=1	sp|P01901|HA1B_MOUSE H-2 class I histocompatibility antigen, K-B alpha chain OS=Mus musculus OX=10090 GN=H2-K1 PE=1 SV=1	215922100	191573900	588416400	355417900	382441800	292977400	392125200	344605400	210938500	285958900	337947800	353678600	409844800	423658600	221148300	242557300	506729100	186610100	299393300	109533000	280925500	277089600	277286200	179685000	158507000	192979000	746931100	740712900	325666100	125238100	192581500	449354200	452285500	157034200	224916400	358319000	346403500	505593100
P01921	HB2D_MOUSE H-2 class II histocompatibility antigen, A-D beta chain OS=Mus musculus OX=10090 GN=H2-Ab1 PE=1 SV=1	H2-Ab1	sp|P01921|HB2D_MOUSE H-2 class II histocompatibility antigen, A-D beta chain OS=Mus musculus OX=10090 GN=H2-Ab1 PE=1 SV=1	sp|P01921|HB2D_MOUSE H-2 class II histocompatibility antigen, A-D beta chain OS=Mus musculus OX=10090 GN=H2-Ab1 PE=1 SV=1	1196640	7386444	21396780	15696600	3410502	7528088	8615137	17578790	7119921	955802	7971522	10610540	12351800	12593760	3466085	1969476	17020760	3676527	4837185	1713083	3976532	7972511	5320707	7840553	606882	2906360	52115070	25084310	7981681	3784555	3592254	20174730	10025930	5082318	2682226	15437560	5240684	44106650
P01942	HBA_MOUSE Hemoglobin subunit alpha OS=Mus musculus OX=10090 GN=Hba PE=1 SV=2	Hba	sp|P01942|HBA_MOUSE Hemoglobin subunit alpha OS=Mus musculus OX=10090 GN=Hba PE=1 SV=2	sp|P01942|HBA_MOUSE Hemoglobin subunit alpha OS=Mus musculus OX=10090 GN=Hba PE=1 SV=2	2398180000	4514639000	472371800	326848200	2448918000	479854300	500376600	794158400	727108100	1748199000	1235239000	526613300	478317300	202248500	602767000	1567362000	448860200	536809600	540035000	1075059000	805992600	127252300	112539000	149928200	82325070	132428500	110710700	262043300	157403300	102313200	628456200	100915700	259468400	147625600	164298400	75491780	163686900	147299900
P02463	CO4A1_MOUSE Collagen alpha-1(IV) chain OS=Mus musculus OX=10090 GN=Col4a1 PE=1 SV=4	Col4a1	sp|P02463|CO4A1_MOUSE Collagen alpha-1(IV) chain OS=Mus musculus OX=10090 GN=Col4a1 PE=1 SV=4	sp|P02463|CO4A1_MOUSE Collagen alpha-1(IV) chain OS=Mus musculus OX=10090 GN=Col4a1 PE=1 SV=4	1095050	284237	556755	74704	496567	281677	240736	310387	253644	897466	112743	221406	401585	195993	427918	99355.4	343637	221361	149677	1248288	105862	237206	356421	122439	358795	287429	1181158	128276	151300	379437	146977	251034	498245	368463	267816	156962	187215	265497
P02535	K1C10_MOUSE Keratin, type I cytoskeletal 10 OS=Mus musculus OX=10090 GN=Krt10 PE=1 SV=3	Krt10	sp|P02535|K1C10_MOUSE Keratin, type I cytoskeletal 10 OS=Mus musculus OX=10090 GN=Krt10 PE=1 SV=3	sp|P02535|K1C10_MOUSE Keratin, type I cytoskeletal 10 OS=Mus musculus OX=10090 GN=Krt10 PE=1 SV=3	172173300	188742800	116534900	50429030	100598200	149416800	158391800	100769100	60708080	358171100	389430800	208711700	120909800	71872240	211896700	220898900	586873100	69859950	41484430	353865000	321615900	132883000	95534500	101342100	181960200	234558800	249884600	496419100	69862630	300929100	287657500	197705000	91984490	216093900	292307100	239326200	60997050	123613500
P02762	MUP6_MOUSE Major urinary protein 6 OS=Mus musculus OX=10090 GN=Mup6 PE=1 SV=2	Mup6	sp|P02762|MUP6_MOUSE Major urinary protein 6 OS=Mus musculus OX=10090 GN=Mup6 PE=1 SV=2	sp|P02762|MUP6_MOUSE Major urinary protein 6 OS=Mus musculus OX=10090 GN=Mup6 PE=1 SV=2	62745990	49593860	21846320	55477730	35672010	43122900	191004700	105364300	49544490	84837230	89389660	101537900	47456250	92159780	83089310	52973790	76794350	79608330	102036300	44715670	45272270	135599300	86423370	76837530	63641230	111268100	103202900	176108400	135616600	69418620	87857630	93568040	188091100	91190580	127817500	119040300	205316900	57593450
P03888	NU1M_MOUSE NADH-ubiquinone oxidoreductase chain 1 OS=Mus musculus OX=10090 GN=Mtnd1 PE=1 SV=3	Mtnd1	sp|P03888|NU1M_MOUSE NADH-ubiquinone oxidoreductase chain 1 OS=Mus musculus OX=10090 GN=Mtnd1 PE=1 SV=3	sp|P03888|NU1M_MOUSE NADH-ubiquinone oxidoreductase chain 1 OS=Mus musculus OX=10090 GN=Mtnd1 PE=1 SV=3	67788010	41405210	42005790	41663180	61178010	50373410	30399520	50768470	34549790	43068810	50287590	39323330	52033190	21580550	61974630	37323050	27621330	39543620	33128310	104115500	72203090	64755680	51608340	29449700	82144130	65444210	73456980	49350350	29146870	68784570	54875620	38022150	34738390	66239190	67070410	57945480	57581440	38135830
P03893	NU2M_MOUSE NADH-ubiquinone oxidoreductase chain 2 OS=Mus musculus OX=10090 GN=Mtnd2 PE=1 SV=2	Mtnd2	sp|P03893|NU2M_MOUSE NADH-ubiquinone oxidoreductase chain 2 OS=Mus musculus OX=10090 GN=Mtnd2 PE=1 SV=2	sp|P03893|NU2M_MOUSE NADH-ubiquinone oxidoreductase chain 2 OS=Mus musculus OX=10090 GN=Mtnd2 PE=1 SV=2	22697900	1582043	5341410	44719550	3517836	37180960	1142495	14439170	1385271	1139653	1865920	1184275	46167530	1150671	2370957	1207113	2383535	21209130	34870760	2480024	1736909	62597630	24889030	60295830	3069979	3149139	3058124	62247200	53563680	2185954	2392578	1644164	19611700	2738717	3376399	34373400	2303818	80022580
P03911	NU4M_MOUSE NADH-ubiquinone oxidoreductase chain 4 OS=Mus musculus OX=10090 GN=Mtnd4 PE=1 SV=1	Mtnd4	sp|P03911|NU4M_MOUSE NADH-ubiquinone oxidoreductase chain 4 OS=Mus musculus OX=10090 GN=Mtnd4 PE=1 SV=1	sp|P03911|NU4M_MOUSE NADH-ubiquinone oxidoreductase chain 4 OS=Mus musculus OX=10090 GN=Mtnd4 PE=1 SV=1	25876650	17225630	23695860	17205370	20652720	14015060	11008680	16567020	12898850	23042760	18482750	14249920	16437440	7673257	23594630	13936990	9295958	14866600	11464640	40918470	28300190	22088700	17218460	13922070	28642460	22500040	27018350	18975570	10588320	25677460	20255520	14464280	12506920	28264390	22943650	17632100	24927920	12950170
P03921	NU5M_MOUSE NADH-ubiquinone oxidoreductase chain 5 OS=Mus musculus OX=10090 GN=Mtnd5 PE=1 SV=3	Mtnd5	sp|P03921|NU5M_MOUSE NADH-ubiquinone oxidoreductase chain 5 OS=Mus musculus OX=10090 GN=Mtnd5 PE=1 SV=3	sp|P03921|NU5M_MOUSE NADH-ubiquinone oxidoreductase chain 5 OS=Mus musculus OX=10090 GN=Mtnd5 PE=1 SV=3	62725390	54028700	68859980	60735750	49217990	48781630	41228190	84466110	65311560	19743880	52408340	35753730	58747590	26303840	60416040	45207150	19685550	82807350	56185690	46855660	46368650	69265590	57368520	44780430	91728920	50038640	89866240	91585420	40144430	56258960	65904260	43783090	53913740	78382380	60865390	67844380	76176110	33967010
P03930	ATP8_MOUSE ATP synthase protein 8 OS=Mus musculus OX=10090 GN=Mtatp8 PE=1 SV=1	Mtatp8	sp|P03930|ATP8_MOUSE ATP synthase protein 8 OS=Mus musculus OX=10090 GN=Mtatp8 PE=1 SV=1	sp|P03930|ATP8_MOUSE ATP synthase protein 8 OS=Mus musculus OX=10090 GN=Mtatp8 PE=1 SV=1	63374520	33223750	21856780	21590410	74533520	45033370	40913890	35755970	35762520	83055480	48377640	44077650	62513770	17172410	58863030	36737710	32639420	27157740	24818980	39377330	18677750	29836120	26445270	14722110	33587700	28576960	22413840	17364740	14969840	33627440	35634980	24884110	18796020	33365990	30475520	18399250	28251020	16147210
P03958	ADA_MOUSE Adenosine deaminase OS=Mus musculus OX=10090 GN=Ada PE=1 SV=3	Ada	sp|P03958|ADA_MOUSE Adenosine deaminase OS=Mus musculus OX=10090 GN=Ada PE=1 SV=3	sp|P03958|ADA_MOUSE Adenosine deaminase OS=Mus musculus OX=10090 GN=Ada PE=1 SV=3	17705640	29993550	23049210	30109030	31883350	31992300	17671380	42573880	33151530	28827080	38240520	36514810	36608060	9041067	35944550	37026070	29800570	27211260	37517800	20215080	36370640	30671120	39539930	26318660	10137890	25766250	38329300	31039470	41241460	16017410	20670550	29603010	44358700	20056960	38616800	34912900	31095550	34640880
P04104	K2C1_MOUSE Keratin, type II cytoskeletal 1 OS=Mus musculus OX=10090 GN=Krt1 PE=1 SV=4	Krt1	sp|P04104|K2C1_MOUSE Keratin, type II cytoskeletal 1 OS=Mus musculus OX=10090 GN=Krt1 PE=1 SV=4	sp|P04104|K2C1_MOUSE Keratin, type II cytoskeletal 1 OS=Mus musculus OX=10090 GN=Krt1 PE=1 SV=4	321765700	257272100	168535800	84703300	189651000	224231500	198284100	121285800	106606700	445340400	512032100	348530000	175832900	111524700	256625000	317649600	688129700	89595410	77950520	383459300	378040600	244438300	127742000	122495300	240281900	387794900	361605600	477566900	111538900	431731600	567196600	384368900	139583900	319888200	514633700	319823600	108835100	229572500
P04117	FABP4_MOUSE Fatty acid-binding protein, adipocyte OS=Mus musculus OX=10090 GN=Fabp4 PE=1 SV=3	Fabp4	sp|P04117|FABP4_MOUSE Fatty acid-binding protein, adipocyte OS=Mus musculus OX=10090 GN=Fabp4 PE=1 SV=3	sp|P04117|FABP4_MOUSE Fatty acid-binding protein, adipocyte OS=Mus musculus OX=10090 GN=Fabp4 PE=1 SV=3	16616920	6147772	6295391	6266337	9501523	7095276	6477616	6796859	2796647	15477120	10312300	9981659	7269756	4037358	9782394	7327155	6677224	5055776	12213060	22988480	5544881	11831050	8549178	4597198	14483990	11669080	14700860	7977756	5932916	32842240	8474590	13457780	12195370	10989600	16716510	6802541	5851526	7864133
P04187	GRAB_MOUSE Granzyme B(G,H) OS=Mus musculus OX=10090 GN=Gzmb PE=1 SV=1	Gzmb	sp|P04187|GRAB_MOUSE Granzyme B(G,H) OS=Mus musculus OX=10090 GN=Gzmb PE=1 SV=1	sp|P04187|GRAB_MOUSE Granzyme B(G,H) OS=Mus musculus OX=10090 GN=Gzmb PE=1 SV=1	161368	438977	1689918	1578703	539101	395057	726550	607156	527241	269554	440031	441343	1460901	827111	251274	264296	960039	295694	207695	337112	293446	580396	151991	192796	327380	112235	897328	1175781	448067	183983	350000	494140	474616	222462	367071	464319	195321	2588680
P04230	HB21_MOUSE H-2 class II histocompatibility antigen, E-B beta chain OS=Mus musculus OX=10090 GN=H2-Eb1 PE=1 SV=1	H2-Eb1	sp|P04230|HB21_MOUSE H-2 class II histocompatibility antigen, E-B beta chain OS=Mus musculus OX=10090 GN=H2-Eb1 PE=1 SV=1	sp|P04230|HB21_MOUSE H-2 class II histocompatibility antigen, E-B beta chain OS=Mus musculus OX=10090 GN=H2-Eb1 PE=1 SV=1	0	101625	990401	375551	75836	122422	125621	444120	137568	196694	135202	231237	470630	328750	0	0	435060	68240.6	11183.5	12776.2	71676.9	184387	74510.4	158106	27523.8	128169	2217352	592126	87519.8	16242.2	25574.8	479924	300037	64880	10899.7	477573	83378	1019970
P04441	HG2A_MOUSE H-2 class II histocompatibility antigen gamma chain OS=Mus musculus OX=10090 GN=Cd74 PE=1 SV=3	Cd74	sp|P04441|HG2A_MOUSE H-2 class II histocompatibility antigen gamma chain OS=Mus musculus OX=10090 GN=Cd74 PE=1 SV=3	sp|P04441|HG2A_MOUSE H-2 class II histocompatibility antigen gamma chain OS=Mus musculus OX=10090 GN=Cd74 PE=1 SV=3	1788076	1206272	6364843	3573776	1075266	1040632	1345740	4471999	2073431	1293714	1327156	2768622	3677101	2115801	771535	968569	2126117	1253458	1966997	942235	341836	1498961	1582973	1481955	894527	249538	10435070	4687377	1532399	433773	1119505	2950229	1515222	750345	1316973	3758703	727166	5841589
P04627	ARAF_MOUSE Serine/threonine-protein kinase A-Raf OS=Mus musculus OX=10090 GN=Araf PE=1 SV=2	Araf	sp|P04627|ARAF_MOUSE Serine/threonine-protein kinase A-Raf OS=Mus musculus OX=10090 GN=Araf PE=1 SV=2	sp|P04627|ARAF_MOUSE Serine/threonine-protein kinase A-Raf OS=Mus musculus OX=10090 GN=Araf PE=1 SV=2	1167359	1248905	1163428	882007	1837672	1544030	1205397	797698	371530	2702063	2508830	1584059	1496003	1158923	936591	1081737	1770961	936918	813361	891477	2314436	1579143	2014885	694840	1376076	1097592	1250927	1349368	1178056	482190	1197756	1244106	1820915	749380	1501056	1169019	646674	1144214
P04919	B3AT_MOUSE Band 3 anion transport protein OS=Mus musculus OX=10090 GN=Slc4a1 PE=1 SV=1	Slc4a1	sp|P04919|B3AT_MOUSE Band 3 anion transport protein OS=Mus musculus OX=10090 GN=Slc4a1 PE=1 SV=1	sp|P04919|B3AT_MOUSE Band 3 anion transport protein OS=Mus musculus OX=10090 GN=Slc4a1 PE=1 SV=1	137803500	474458300	370573500	107860300	139900300	139959000	406040300	309739300	165102800	108688900	353352600	435992200	251946300	266604800	113682500	620715300	384295500	270198900	221715300	249121900	889991100	665588700	475357200	275628300	114677100	176701400	373980000	408503300	300088400	172403700	583843400	351008500	497725600	237642500	283186200	508974000	429566000	390567200
P04938	MUP11_MOUSE Major urinary protein 11 OS=Mus musculus OX=10090 GN=Mup11 PE=1 SV=2	Mup11	sp|P04938|MUP11_MOUSE Major urinary protein 11 OS=Mus musculus OX=10090 GN=Mup11 PE=1 SV=2	sp|P04938|MUP11_MOUSE Major urinary protein 11 OS=Mus musculus OX=10090 GN=Mup11 PE=1 SV=2	62745990	49593860	21846320	55477730	35672010	43122900	191004700	105364300	49544490	84837230	89389660	101537900	47456250	92159780	83089310	52973790	76794350	79608330	102036300	44715670	45272270	135599300	86423370	76837530	63641230	111268100	103202900	176108400	135616600	69418620	87857630	93568040	188091100	91190580	127817500	119040300	205316900	57593450
P04939	MUP3_MOUSE Major urinary protein 3 OS=Mus musculus OX=10090 GN=Mup3 PE=1 SV=1	Mup3	sp|P04939|MUP3_MOUSE Major urinary protein 3 OS=Mus musculus OX=10090 GN=Mup3 PE=1 SV=1	sp|P04939|MUP3_MOUSE Major urinary protein 3 OS=Mus musculus OX=10090 GN=Mup3 PE=1 SV=1	49974410	92747010	61017350	63502470	52410760	110468300	171016500	157107000	134765200	65294640	120466600	176987600	70043590	81886500	78781850	107586900	226059300	106211800	151694300	47601210	74736910	277319700	146838700	120077100	62132280	108044700	266849100	137385000	166364200	64296950	123892000	148378000	215096300	143748500	158924900	225098800	114146800	116391400
P05064	ALDOA_MOUSE Fructose-bisphosphate aldolase A OS=Mus musculus OX=10090 GN=Aldoa PE=1 SV=2	Aldoa	sp|P05064|ALDOA_MOUSE Fructose-bisphosphate aldolase A OS=Mus musculus OX=10090 GN=Aldoa PE=1 SV=2	sp|P05064|ALDOA_MOUSE Fructose-bisphosphate aldolase A OS=Mus musculus OX=10090 GN=Aldoa PE=1 SV=2	33591570	22554310	16279670	15986150	26128720	24850640	23172230	15926600	15476340	51687850	34061200	34167580	22793900	5803608	23713680	21457880	20639020	12450540	22506990	22752840	7262328	5125563	5176315	6925981	3643387	7119671	3644087	5599526	3467368	3911178	10531730	7880738	6611625	3299335	8082843	2510795	3928272	2567430
P05201	AATC_MOUSE Aspartate aminotransferase, cytoplasmic OS=Mus musculus OX=10090 GN=Got1 PE=1 SV=3	Got1	sp|P05201|AATC_MOUSE Aspartate aminotransferase, cytoplasmic OS=Mus musculus OX=10090 GN=Got1 PE=1 SV=3	sp|P05201|AATC_MOUSE Aspartate aminotransferase, cytoplasmic OS=Mus musculus OX=10090 GN=Got1 PE=1 SV=3	402596400	461318100	452017400	433048600	472891800	473616100	560415800	693655100	538494300	550189000	576911700	1045916000	604215400	319194900	459854600	554884500	647052900	444514900	648710300	183070000	330392100	913391800	449548700	502173000	290951400	220886200	224030200	422762800	426571200	247659000	409486700	638563900	654139000	118727300	295523800	288921700	451020000	159872100
P05202	AATM_MOUSE Aspartate aminotransferase, mitochondrial OS=Mus musculus OX=10090 GN=Got2 PE=1 SV=1	Got2	sp|P05202|AATM_MOUSE Aspartate aminotransferase, mitochondrial OS=Mus musculus OX=10090 GN=Got2 PE=1 SV=1	sp|P05202|AATM_MOUSE Aspartate aminotransferase, mitochondrial OS=Mus musculus OX=10090 GN=Got2 PE=1 SV=1	14030370000	8806575000	6317936000	4550430000	15785020000	8650482000	6145444000	9389241000	5418643000	15878640000	11419970000	7793169000	7624589000	2194720000	12987980000	7286377000	6748191000	6375117000	4619963000	9559630000	5040434000	4766146000	3362932000	2559412000	4959506000	3683902000	3569180000	3365666000	1870835000	7626347000	6915563000	3204901000	3641268000	4911731000	4464077000	2744132000	3624770000	1632451000
P05208	CEL2A_MOUSE Chymotrypsin-like elastase family member 2A OS=Mus musculus OX=10090 GN=Cela2a PE=1 SV=1	Cela2a	sp|P05208|CEL2A_MOUSE Chymotrypsin-like elastase family member 2A OS=Mus musculus OX=10090 GN=Cela2a PE=1 SV=1	sp|P05208|CEL2A_MOUSE Chymotrypsin-like elastase family member 2A OS=Mus musculus OX=10090 GN=Cela2a PE=1 SV=1	2879144	2095919	778402	1065322	2646982	2606273	1386140	858133	2920376	130594500	8206579	696614	1211831	628392	2877096	2251245	975568	3024863	2434786	788707	3841356	2614203	654816	1264618	893067	1386644	1583205	1144310	2078226	322251	6725328	4246902	1449548	4831506	1453342	1116560	1429951	783512
P05784	K1C18_MOUSE Keratin, type I cytoskeletal 18 OS=Mus musculus OX=10090 GN=Krt18 PE=1 SV=5	Krt18	sp|P05784|K1C18_MOUSE Keratin, type I cytoskeletal 18 OS=Mus musculus OX=10090 GN=Krt18 PE=1 SV=5	sp|P05784|K1C18_MOUSE Keratin, type I cytoskeletal 18 OS=Mus musculus OX=10090 GN=Krt18 PE=1 SV=5	729015400	291945300	343884200	230378000	354400100	303067100	194694800	207182400	202794600	521384700	241261100	350611000	264927000	121335600	357227700	116950400	325113100	159524200	202885500	423540500	114449000	294234600	257861500	119318300	248353900	302834200	404759300	271783000	223080800	227774400	211683200	275866900	221728400	328151300	328205400	212379300	245636100	211744100
P05977	MYL1_MOUSE Myosin light chain 1/3, skeletal muscle isoform OS=Mus musculus OX=10090 GN=Myl1 PE=1 SV=2	Myl1	sp|P05977|MYL1_MOUSE Myosin light chain 1/3, skeletal muscle isoform OS=Mus musculus OX=10090 GN=Myl1 PE=1 SV=2	sp|P05977|MYL1_MOUSE Myosin light chain 1/3, skeletal muscle isoform OS=Mus musculus OX=10090 GN=Myl1 PE=1 SV=2	3395407	555485	263466	320920	307384	859027	487399	280444	332773	11151010	4891104	512613	353614	234388	147274	5893850	384336	317306	118425	198768	580058	588172	322047	341770	132307	7240974	204439	600089	206493	127187	379739	1399873	621163	284172	921521	273853	451454	262353
P06151	LDHA_MOUSE L-lactate dehydrogenase A chain OS=Mus musculus OX=10090 GN=Ldha PE=1 SV=3	Ldha	sp|P06151|LDHA_MOUSE L-lactate dehydrogenase A chain OS=Mus musculus OX=10090 GN=Ldha PE=1 SV=3	sp|P06151|LDHA_MOUSE L-lactate dehydrogenase A chain OS=Mus musculus OX=10090 GN=Ldha PE=1 SV=3	713009100	691737000	1075769000	984203500	666454500	689687900	910226300	1025575000	1151599000	847317600	930608800	1195286000	1062316000	779109900	798105900	1066497000	949840400	970606900	1177963000	461651500	676785400	1070952000	901074200	887428700	596584500	585265700	651415400	858108600	1108537000	578929500	629879200	974059500	1213716000	511126600	721872400	615012800	755706400	644599500
P06330	HVM51_MOUSE Ig heavy chain V region AC38 205.12 OS=Mus musculus OX=10090 PE=1 SV=1	NoGeneName	sp|P06330|HVM51_MOUSE Ig heavy chain V region AC38 205.12 OS=Mus musculus OX=10090 PE=1 SV=1	sp|P06330|HVM51_MOUSE Ig heavy chain V region AC38 205.12 OS=Mus musculus OX=10090 PE=1 SV=1	701592	5586937	14120930	14791360	6678609	3350891	6021955	8340547	6512588	1858339	9867755	11771140	6832722	7610455	3075644	5519424	10535910	8916176	4329910	2269336	8204786	6501293	15478330	7695336	920801	1894021	24576880	14561840	11666970	1510007	10242030	15972750	26535900	2596613	2942039	13708940	12812510	16647510
P06339	HA15_MOUSE H-2 class I histocompatibility antigen, D-37 alpha chain OS=Mus musculus OX=10090 GN=H2-T23 PE=1 SV=1	H2-T23	sp|P06339|HA15_MOUSE H-2 class I histocompatibility antigen, D-37 alpha chain OS=Mus musculus OX=10090 GN=H2-T23 PE=1 SV=1	sp|P06339|HA15_MOUSE H-2 class I histocompatibility antigen, D-37 alpha chain OS=Mus musculus OX=10090 GN=H2-T23 PE=1 SV=1	8042591	6893699	34516770	19918380	12367620	18012310	20097960	14755890	6713436	8245515	15804130	14094410	33726680	21231940	7393081	9132885	21457620	5992459	12294860	4795152	8208282	6819726	15454260	5410077	5531971	10314260	44342390	52138930	11369310	4733962	10366240	15181460	25016180	4913096	10964730	20254720	15887410	26739230
P06344	HB2U_MOUSE H-2 class II histocompatibility antigen, A-U beta chain OS=Mus musculus OX=10090 PE=1 SV=1	NoGeneName	sp|P06344|HB2U_MOUSE H-2 class II histocompatibility antigen, A-U beta chain OS=Mus musculus OX=10090 PE=1 SV=1	sp|P06344|HB2U_MOUSE H-2 class II histocompatibility antigen, A-U beta chain OS=Mus musculus OX=10090 PE=1 SV=1	1735719	2856181	19737360	14203250	782664	2353923	3441003	10675280	3806204	1556688	2914204	2358251	11988130	17543930	2574731	2058430	6689361	3803183	2475079	2753488	2705925	3482270	3301825	6458711	1201267	1496811	47536140	25095550	6115350	3925276	681386	16537000	8673336	1836707	1923357	16178230	5204702	49196220
P06684	CO5_MOUSE Complement C5 OS=Mus musculus OX=10090 GN=C5 PE=1 SV=2	C5	sp|P06684|CO5_MOUSE Complement C5 OS=Mus musculus OX=10090 GN=C5 PE=1 SV=2	sp|P06684|CO5_MOUSE Complement C5 OS=Mus musculus OX=10090 GN=C5 PE=1 SV=2	18820990	25295780	32610660	29458340	23367120	23344140	36045250	33385480	34118050	20297150	25286280	31647230	25099760	30612080	25171410	32980780	33028760	30900730	38956420	9179451	21472680	39006970	42195350	26263610	9770715	16172530	46069810	38449940	36721580	10713870	17616100	31168590	53889590	19392950	25870940	34854830	29562610	33326920
P06728	APOA4_MOUSE Apolipoprotein A-IV OS=Mus musculus OX=10090 GN=Apoa4 PE=1 SV=3	Apoa4	sp|P06728|APOA4_MOUSE Apolipoprotein A-IV OS=Mus musculus OX=10090 GN=Apoa4 PE=1 SV=3	sp|P06728|APOA4_MOUSE Apolipoprotein A-IV OS=Mus musculus OX=10090 GN=Apoa4 PE=1 SV=3	52714380	52285340	70389050	40190470	107527300	74158680	74459340	95755130	88498350	96896080	72538890	21562740	31539250	48767270	71923160	114608400	47357500	61246630	121869100	17934700	28622900	25385730	23379920	43270920	10950950	9329311	41309800	67723520	48134980	12573660	35569120	26104570	68057090	15697630	24718690	24305980	16220670	36329250
P06745	G6PI_MOUSE Glucose-6-phosphate isomerase OS=Mus musculus OX=10090 GN=Gpi PE=1 SV=4	Gpi	sp|P06745|G6PI_MOUSE Glucose-6-phosphate isomerase OS=Mus musculus OX=10090 GN=Gpi PE=1 SV=4	sp|P06745|G6PI_MOUSE Glucose-6-phosphate isomerase OS=Mus musculus OX=10090 GN=Gpi PE=1 SV=4	60876820	54774790	74369460	46013090	63175690	46722660	63793820	62285900	78942730	76597720	80620500	58482630	61564110	28956920	50544550	70622830	77851900	44451830	93055360	23070840	33920090	46873520	38703900	35672130	31276300	22415760	44913080	49846720	41859100	24200740	32211560	45900060	70132850	16465620	23677890	36233530	36538670	32584460
P06797	CATL1_MOUSE Cathepsin L1 OS=Mus musculus OX=10090 GN=Ctsl PE=1 SV=2	Ctsl	sp|P06797|CATL1_MOUSE Cathepsin L1 OS=Mus musculus OX=10090 GN=Ctsl PE=1 SV=2	sp|P06797|CATL1_MOUSE Cathepsin L1 OS=Mus musculus OX=10090 GN=Ctsl PE=1 SV=2	8664256	11483780	19703320	17911650	21384150	21902720	23528120	26897790	14746900	14224800	12601300	22779460	18086590	17258800	23810370	21825750	35281830	16652190	32635410	11257460	20934370	22211980	32665880	14473510	21720330	28206170	55483210	44452660	29979920	8550276	15335100	20215130	35724850	21468580	23405610	25175360	32109340	30655870
P06800	PTPRC_MOUSE Receptor-type tyrosine-protein phosphatase C OS=Mus musculus OX=10090 GN=Ptprc PE=1 SV=4	Ptprc	sp|P06800|PTPRC_MOUSE Receptor-type tyrosine-protein phosphatase C OS=Mus musculus OX=10090 GN=Ptprc PE=1 SV=4	sp|P06800|PTPRC_MOUSE Receptor-type tyrosine-protein phosphatase C OS=Mus musculus OX=10090 GN=Ptprc PE=1 SV=4	19526100	27065580	80352030	53342890	19308370	23327640	44560060	36419950	21075050	22669510	32060940	45978750	62637990	44283330	21919820	21519440	49674890	23227940	24083870	9071374	35553730	44929500	42740190	27561200	10692790	18886780	128245100	77900290	39059080	23140550	34639590	57054440	53902670	32372920	35756950	60395940	54256800	104743100
P06801	MAOX_MOUSE NADP-dependent malic enzyme OS=Mus musculus OX=10090 GN=Me1 PE=1 SV=2	Me1	sp|P06801|MAOX_MOUSE NADP-dependent malic enzyme OS=Mus musculus OX=10090 GN=Me1 PE=1 SV=2	sp|P06801|MAOX_MOUSE NADP-dependent malic enzyme OS=Mus musculus OX=10090 GN=Me1 PE=1 SV=2	156207800	138183500	132927600	148351900	172817200	108989800	148617000	154249500	243254900	162818700	260051300	152359300	106646200	102127800	103124100	146700400	171051000	110727000	287970300	63371880	117053200	96143340	121777600	115719900	99161950	87447270	94701320	115761800	158238200	88969110	66021580	126889900	184040200	32905550	80090260	81026310	89258830	88056950
P06802	ENPP1_MOUSE Ectonucleotide pyrophosphatase/phosphodiesterase family member 1 OS=Mus musculus OX=10090 GN=Enpp1 PE=1 SV=4	Enpp1	sp|P06802|ENPP1_MOUSE Ectonucleotide pyrophosphatase/phosphodiesterase family member 1 OS=Mus musculus OX=10090 GN=Enpp1 PE=1 SV=4	sp|P06802|ENPP1_MOUSE Ectonucleotide pyrophosphatase/phosphodiesterase family member 1 OS=Mus musculus OX=10090 GN=Enpp1 PE=1 SV=4	30072360	57802570	38782890	29777510	25219040	37100010	41734240	37577990	42535610	33280990	57968580	89913220	43587010	68118910	31241780	49878200	56414340	47263950	53374940	31349530	83865070	69535790	65994620	90963080	29346190	37919800	61695180	88963350	93462480	28634280	68875560	67812950	164422600	46183300	64265040	50815200	58486360	44759090
P06909	CFAH_MOUSE Complement factor H OS=Mus musculus OX=10090 GN=Cfh PE=1 SV=2	Cfh	sp|P06909|CFAH_MOUSE Complement factor H OS=Mus musculus OX=10090 GN=Cfh PE=1 SV=2	sp|P06909|CFAH_MOUSE Complement factor H OS=Mus musculus OX=10090 GN=Cfh PE=1 SV=2	36466730	66563770	78843030	50930320	59205460	70245600	119298900	94019200	63123340	54453260	89637620	40183100	60281000	123790900	60271600	107584700	87479050	75847030	82400760	13173650	88715690	60981050	65718550	76150940	12562220	28120450	120225900	116248300	82369830	13015220	49324020	70432110	162957100	30738270	53764830	116995600	63074770	90970970
P07146	TRY2_MOUSE Anionic trypsin-2 OS=Mus musculus OX=10090 GN=Prss2 PE=1 SV=1	Prss2	sp|P07146|TRY2_MOUSE Anionic trypsin-2 OS=Mus musculus OX=10090 GN=Prss2 PE=1 SV=1	sp|P07146|TRY2_MOUSE Anionic trypsin-2 OS=Mus musculus OX=10090 GN=Prss2 PE=1 SV=1	567731	896482	515664	1151440	3159362	1102859	1267381	1489359	1123437	62967730	867512	1151141	911908	606363	936334	1401743	1497140	1557192	794928	1687834	1793531	1048797	733264	1011291	1176519	1594146	656630	756993	1247779	671502	1446306	1734203	1670801	2293675	1479931	748060	825844	1173074
P07214	SPRC_MOUSE SPARC OS=Mus musculus OX=10090 GN=Sparc PE=1 SV=1	Sparc	sp|P07214|SPRC_MOUSE SPARC OS=Mus musculus OX=10090 GN=Sparc PE=1 SV=1	sp|P07214|SPRC_MOUSE SPARC OS=Mus musculus OX=10090 GN=Sparc PE=1 SV=1	15749440	4214007	9270283	3523627	26145020	21169510	19900150	15789630	13184890	30700260	16590450	4076538	8954673	1641131	21724000	29180910	6362384	14420140	15163820	896016	2847286	2554510	2468213	939234	1329716	1664670	2580107	1649696	1829940	1884897	2426785	2980996	2583608	1670271	1538576	1129354	2697400	2068991
P07309	TTHY_MOUSE Transthyretin OS=Mus musculus OX=10090 GN=Ttr PE=1 SV=1	Ttr	sp|P07309|TTHY_MOUSE Transthyretin OS=Mus musculus OX=10090 GN=Ttr PE=1 SV=1	sp|P07309|TTHY_MOUSE Transthyretin OS=Mus musculus OX=10090 GN=Ttr PE=1 SV=1	145314700	427592500	531827700	387227300	302818300	402638800	625937100	705582700	522943000	321273600	526589000	634560500	461078100	618281600	385822600	656442700	573236900	619075000	452728700	162484700	783748100	796035300	733134800	624855000	271689900	383477800	977754000	559933600	715168300	172200900	494314200	777042500	1094570000	471279800	539070500	843919500	474176000	753181600
P07356	ANXA2_MOUSE Annexin A2 OS=Mus musculus OX=10090 GN=Anxa2 PE=1 SV=2	Anxa2	sp|P07356|ANXA2_MOUSE Annexin A2 OS=Mus musculus OX=10090 GN=Anxa2 PE=1 SV=2	sp|P07356|ANXA2_MOUSE Annexin A2 OS=Mus musculus OX=10090 GN=Anxa2 PE=1 SV=2	7849434	8408285	15546690	16185530	7613238	8106280	10063050	10926220	6420348	10060930	9927186	19263270	16131150	10828850	11660090	7436505	15650050	8704933	9528790	9695865	10206230	20573340	15451820	9597417	5752949	9474178	25040890	25190400	14436420	7265335	12917430	18407750	17500080	7581764	12030210	10379850	11957460	18251100
P07724	ALBU_MOUSE Serum albumin OS=Mus musculus OX=10090 GN=Alb PE=1 SV=3	Alb	sp|P07724|ALBU_MOUSE Serum albumin OS=Mus musculus OX=10090 GN=Alb PE=1 SV=3	sp|P07724|ALBU_MOUSE Serum albumin OS=Mus musculus OX=10090 GN=Alb PE=1 SV=3	2339297000	12400500000	7711610000	6130671000	2718212000	3405238000	6513196000	11724280000	8245008000	3033840000	16988310000	6303497000	11664750000	9149576000	2982961000	11366300000	6185451000	9580793000	9458442000	1858617000	21673300000	4069276000	5398488000	11549160000	1050114000	2796410000	3572426000	5601734000	4468873000	839745300	9304923000	3508629000	15693080000	935468700	3734752000	2835104000	5782790000	3741409000
P07759	SPA3K_MOUSE Serine protease inhibitor A3K OS=Mus musculus OX=10090 GN=Serpina3k PE=1 SV=2	Serpina3k	sp|P07759|SPA3K_MOUSE Serine protease inhibitor A3K OS=Mus musculus OX=10090 GN=Serpina3k PE=1 SV=2	sp|P07759|SPA3K_MOUSE Serine protease inhibitor A3K OS=Mus musculus OX=10090 GN=Serpina3k PE=1 SV=2	24853290	77879340	64866760	31377980	46556280	65014780	191250200	101463900	53985710	58265420	99205940	37446640	46573920	86521830	62030040	186888500	95530090	105842300	101434700	23021170	126298600	83874460	58348900	65676430	22062880	49660170	96195720	126715000	163566900	22359230	119363900	84842450	107830200	90075770	124828100	156996700	37148480	169868200
P07901	HS90A_MOUSE Heat shock protein HSP 90-alpha OS=Mus musculus OX=10090 GN=Hsp90aa1 PE=1 SV=4	Hsp90aa1	sp|P07901|HS90A_MOUSE Heat shock protein HSP 90-alpha OS=Mus musculus OX=10090 GN=Hsp90aa1 PE=1 SV=4	sp|P07901|HS90A_MOUSE Heat shock protein HSP 90-alpha OS=Mus musculus OX=10090 GN=Hsp90aa1 PE=1 SV=4	281539400	178225500	285113700	184536700	210344600	164696500	246402700	232608600	228185900	353804400	261815000	258060300	261216000	132494600	208165600	253905200	325148000	162556100	320397200	68792350	89912530	332381600	183553400	121443800	90812900	78012250	260816000	236696700	226039400	98447260	125321100	258497000	227230300	76803710	118135900	183303300	134120100	135417200
P08003	PDIA4_MOUSE Protein disulfide-isomerase A4 OS=Mus musculus OX=10090 GN=Pdia4 PE=1 SV=3	Pdia4	sp|P08003|PDIA4_MOUSE Protein disulfide-isomerase A4 OS=Mus musculus OX=10090 GN=Pdia4 PE=1 SV=3	sp|P08003|PDIA4_MOUSE Protein disulfide-isomerase A4 OS=Mus musculus OX=10090 GN=Pdia4 PE=1 SV=3	688593800	1367587000	2206259000	1572371000	781639200	1373953000	2186086000	2134598000	1877556000	836309600	1368275000	2216223000	1813503000	1559374000	1004510000	1335893000	2422709000	1650524000	1761799000	499623400	1259106000	2261859000	1963629000	1668284000	450052400	1057331000	2346912000	2209498000	1893131000	580973500	1160160000	2192100000	2468083000	1111604000	1697273000	2026669000	1482816000	2074824000
P08032	SPTA1_MOUSE Spectrin alpha chain, erythrocytic 1 OS=Mus musculus OX=10090 GN=Spta1 PE=1 SV=3	Spta1	sp|P08032|SPTA1_MOUSE Spectrin alpha chain, erythrocytic 1 OS=Mus musculus OX=10090 GN=Spta1 PE=1 SV=3	sp|P08032|SPTA1_MOUSE Spectrin alpha chain, erythrocytic 1 OS=Mus musculus OX=10090 GN=Spta1 PE=1 SV=3	37079450	142625400	100825500	27605540	42831660	41377850	130112200	79768360	43406960	35418380	102359900	145779100	69928100	65811990	33242100	186295200	134585400	69419380	55697940	42432570	224466000	152538400	98618630	61003210	21241780	33529890	60609380	80906120	50922770	35987630	156164900	78950360	122400400	40579610	53508890	85651220	92329220	66024480
P08071	TRFL_MOUSE Lactotransferrin OS=Mus musculus OX=10090 GN=Ltf PE=1 SV=4	Ltf	sp|P08071|TRFL_MOUSE Lactotransferrin OS=Mus musculus OX=10090 GN=Ltf PE=1 SV=4	sp|P08071|TRFL_MOUSE Lactotransferrin OS=Mus musculus OX=10090 GN=Ltf PE=1 SV=4	60301590	41072360	38553670	25863220	30332940	26797270	13119480	31535060	18831700	31637810	27825520	37803230	23333810	35586260	33310280	33086940	46266540	15908110	31655670	18932160	14588530	16167750	16056710	21410770	10771260	10270100	20687760	43974400	6037400	11465600	28100170	13714210	21366760	23658810	9135042	13862210	10542400	10181550
P08101	FCGR2_MOUSE Low affinity immunoglobulin gamma Fc region receptor II OS=Mus musculus OX=10090 GN=Fcgr2 PE=1 SV=2	Fcgr2	sp|P08101|FCGR2_MOUSE Low affinity immunoglobulin gamma Fc region receptor II OS=Mus musculus OX=10090 GN=Fcgr2 PE=1 SV=2	sp|P08101|FCGR2_MOUSE Low affinity immunoglobulin gamma Fc region receptor II OS=Mus musculus OX=10090 GN=Fcgr2 PE=1 SV=2	17680330	16303910	27208720	22717350	15642200	22064680	20010050	23988360	22453420	22655820	19784090	35558260	25849760	12274880	14677100	15532550	26522820	23519440	20990250	16234550	18618990	39967680	31092510	19509920	11525980	14932640	33605370	21019630	28782590	12416400	26054030	40524260	40878150	12732120	11980110	18646140	25446790	18244550
P08103	HCK_MOUSE Tyrosine-protein kinase HCK OS=Mus musculus OX=10090 GN=Hck PE=1 SV=4	Hck	sp|P08103|HCK_MOUSE Tyrosine-protein kinase HCK OS=Mus musculus OX=10090 GN=Hck PE=1 SV=4	sp|P08103|HCK_MOUSE Tyrosine-protein kinase HCK OS=Mus musculus OX=10090 GN=Hck PE=1 SV=4	2677042	1217576	4612401	2444418	1324617	865381	2293554	1424175	1023600	1227484	1704060	1652638	2840136	2150661	1086568	501432	2114270	1002345	1067693	807599	1479984	2455412	1664221	1369696	700533	934433	3037987	3147708	1344859	1138799	1825872	1554729	2175943	1970494	1606464	2202196	2665343	3850114
P08113	ENPL_MOUSE Endoplasmin OS=Mus musculus OX=10090 GN=Hsp90b1 PE=1 SV=2	Hsp90b1	sp|P08113|ENPL_MOUSE Endoplasmin OS=Mus musculus OX=10090 GN=Hsp90b1 PE=1 SV=2	sp|P08113|ENPL_MOUSE Endoplasmin OS=Mus musculus OX=10090 GN=Hsp90b1 PE=1 SV=2	2963726000	3900495000	7826817000	5904084000	2706258000	4748543000	7053844000	7791407000	6764972000	3121359000	4005611000	6855401000	6755723000	4830949000	3619695000	4341998000	7041432000	6203079000	7037274000	1644861000	3520151000	9254550000	6800316000	6095474000	1666662000	4095281000	11604790000	9560701000	7925121000	2201260000	3146706000	8226796000	8110491000	4439276000	5926829000	9369181000	5380180000	8153867000
P08122	CO4A2_MOUSE Collagen alpha-2(IV) chain OS=Mus musculus OX=10090 GN=Col4a2 PE=1 SV=4	Col4a2	sp|P08122|CO4A2_MOUSE Collagen alpha-2(IV) chain OS=Mus musculus OX=10090 GN=Col4a2 PE=1 SV=4	sp|P08122|CO4A2_MOUSE Collagen alpha-2(IV) chain OS=Mus musculus OX=10090 GN=Col4a2 PE=1 SV=4	16829250	2210604	8064556	2245836	6248756	3364498	2321420	2184647	2013505	13493290	2326324	1752204	3849332	1945183	4785674	1563682	4006807	1539279	2215447	14021820	1439050	3005091	2717316	1667575	2980957	3370521	8271830	2988373	2252958	4602264	2025098	3956877	2782793	3502390	3128977	1709072	2408146	2629500
P08226	APOE_MOUSE Apolipoprotein E OS=Mus musculus OX=10090 GN=Apoe PE=1 SV=2	Apoe	sp|P08226|APOE_MOUSE Apolipoprotein E OS=Mus musculus OX=10090 GN=Apoe PE=1 SV=2	sp|P08226|APOE_MOUSE Apolipoprotein E OS=Mus musculus OX=10090 GN=Apoe PE=1 SV=2	2397385000	1547251000	1925024000	1099924000	5891741000	4187887000	3855499000	4901603000	3118632000	6279706000	2970019000	971718000	1713243000	730109600	3539715000	5781152000	1949031000	3568208000	4570158000	195858100	503513500	1281516000	796801300	927511900	204550500	562787300	1494322000	927968200	953503800	233552400	359294400	1270613000	1347687000	538940300	641366100	1146933000	878212700	1045395000
P08228	SODC_MOUSE Superoxide dismutase [Cu-Zn] OS=Mus musculus OX=10090 GN=Sod1 PE=1 SV=2	Sod1	sp|P08228|SODC_MOUSE Superoxide dismutase [Cu-Zn] OS=Mus musculus OX=10090 GN=Sod1 PE=1 SV=2	sp|P08228|SODC_MOUSE Superoxide dismutase [Cu-Zn] OS=Mus musculus OX=10090 GN=Sod1 PE=1 SV=2	624284400	832862400	915253000	933968300	692212600	775784200	947596700	963471900	719692900	750602600	973223500	1390626000	999104500	1143809000	908495000	884112300	1147351000	872507600	741731800	1127992000	1754803000	1503766000	1820857000	1293348000	2373411000	1971752000	1536900000	1681344000	1974039000	1082958000	1505802000	1309057000	2102605000	1686747000	1904443000	1033855000	2082712000	1238553000
P08249	MDHM_MOUSE Malate dehydrogenase, mitochondrial OS=Mus musculus OX=10090 GN=Mdh2 PE=1 SV=3	Mdh2	sp|P08249|MDHM_MOUSE Malate dehydrogenase, mitochondrial OS=Mus musculus OX=10090 GN=Mdh2 PE=1 SV=3	sp|P08249|MDHM_MOUSE Malate dehydrogenase, mitochondrial OS=Mus musculus OX=10090 GN=Mdh2 PE=1 SV=3	6217534000	3901335000	1796195000	1305208000	7198573000	3581294000	2709612000	3070043000	1903670000	7274514000	5550222000	3226756000	3040643000	488053000	4598385000	3062421000	2632609000	2046255000	1659810000	3891153000	1250405000	572912300	488660000	582987600	702530800	636447300	310228100	487763800	249109900	1349218000	1992150000	451041800	558450200	492496100	827177500	233109200	587788800	227588900
P08607	C4BPA_MOUSE C4b-binding protein OS=Mus musculus OX=10090 GN=C4bpa PE=1 SV=3	C4bpa	sp|P08607|C4BPA_MOUSE C4b-binding protein OS=Mus musculus OX=10090 GN=C4bpa PE=1 SV=3	sp|P08607|C4BPA_MOUSE C4b-binding protein OS=Mus musculus OX=10090 GN=C4bpa PE=1 SV=3	4376737	5677312	11390350	6736746	1599707	5231222	10433060	5167916	3621372	3452101	6211216	5283020	6893298	24005780	3436864	3820867	11987790	3756990	5032896	2204221	14527520	4803346	8391564	5797564	4972095	4528276	22995220	32875140	5979570	3763137	11140110	8916998	17389490	9509987	9349112	10152630	10413640	7898496
P08752	GNAI2_MOUSE Guanine nucleotide-binding protein G(i) subunit alpha-2 OS=Mus musculus OX=10090 GN=Gnai2 PE=1 SV=5	Gnai2	sp|P08752|GNAI2_MOUSE Guanine nucleotide-binding protein G(i) subunit alpha-2 OS=Mus musculus OX=10090 GN=Gnai2 PE=1 SV=5	sp|P08752|GNAI2_MOUSE Guanine nucleotide-binding protein G(i) subunit alpha-2 OS=Mus musculus OX=10090 GN=Gnai2 PE=1 SV=5	61125770	65171660	132142700	101598500	51455010	67214750	94072890	95249300	61331760	63941710	82628890	134260900	106255600	81358470	60854030	60893730	109562400	65871700	80235840	72298290	80389010	128401200	114101900	91006640	49231610	68567940	250184300	187394000	112930600	63269190	89259220	130441700	174588600	90695610	103437000	135914700	124119700	157602900
P08905	LYZ2_MOUSE Lysozyme C-2 OS=Mus musculus OX=10090 GN=Lyz2 PE=1 SV=2	Lyz2	sp|P08905|LYZ2_MOUSE Lysozyme C-2 OS=Mus musculus OX=10090 GN=Lyz2 PE=1 SV=2	sp|P08905|LYZ2_MOUSE Lysozyme C-2 OS=Mus musculus OX=10090 GN=Lyz2 PE=1 SV=2	4061602	2268397	1667823	1013047	1601023	1278176	963385	1043008	382142	2562392	2197848	3035486	2847658	2146929	1669717	1667143	2872462	322857	828108	16442760	2139136	1440852	2162588	338151	585872	1812243	2504947	5189170	860172	645203	2091735	1200648	1211960	3059003	1219180	1107752	1407831	2032728
P09055	ITB1_MOUSE Integrin beta-1 OS=Mus musculus OX=10090 GN=Itgb1 PE=1 SV=1	Itgb1	sp|P09055|ITB1_MOUSE Integrin beta-1 OS=Mus musculus OX=10090 GN=Itgb1 PE=1 SV=1	sp|P09055|ITB1_MOUSE Integrin beta-1 OS=Mus musculus OX=10090 GN=Itgb1 PE=1 SV=1	105420300	117311500	149114200	118010400	89803510	103117000	109960300	122834700	89214050	118164500	149188600	195501500	130373300	156541900	88583220	114553100	159409000	98001100	116950400	116207500	150064600	194344100	159501800	150909900	73851700	97443810	243621700	186556000	194805600	90857680	149281300	201322000	309778800	114251300	151970700	141593700	136212000	150358800
P09103	PDIA1_MOUSE Protein disulfide-isomerase OS=Mus musculus OX=10090 GN=P4hb PE=1 SV=2	P4hb	sp|P09103|PDIA1_MOUSE Protein disulfide-isomerase OS=Mus musculus OX=10090 GN=P4hb PE=1 SV=2	sp|P09103|PDIA1_MOUSE Protein disulfide-isomerase OS=Mus musculus OX=10090 GN=P4hb PE=1 SV=2	2415755000	4777547000	6783850000	5508853000	2744518000	4514183000	6720907000	7633518000	6240939000	2703176000	4718504000	7275425000	5604958000	5593597000	3659914000	4729375000	6903592000	5815786000	6729620000	2130505000	5492535000	9164959000	8655993000	6977632000	2832310000	5969789000	11122480000	9162645000	8557959000	2519801000	4032210000	8209833000	9718098000	5356321000	6938166000	9222942000	7093750000	8153544000
P09242	PPBT_MOUSE Alkaline phosphatase, tissue-nonspecific isozyme OS=Mus musculus OX=10090 GN=Alpl PE=1 SV=2	Alpl	sp|P09242|PPBT_MOUSE Alkaline phosphatase, tissue-nonspecific isozyme OS=Mus musculus OX=10090 GN=Alpl PE=1 SV=2	sp|P09242|PPBT_MOUSE Alkaline phosphatase, tissue-nonspecific isozyme OS=Mus musculus OX=10090 GN=Alpl PE=1 SV=2	21516390	6107291	7173412	6442238	3294727	298236	5785641	3252402	1003590	13384090	1268624	10100380	10086870	760839	15409970	3403294	8824104	4071349	370197	49802850	1090619	536863	778171	1799911	14043360	1077911	12535250	8108496	5911167	1392010	8024976	11733280	915107	2176908	998780	6596673	964799	2782689
P09405	NUCL_MOUSE Nucleolin OS=Mus musculus OX=10090 GN=Ncl PE=1 SV=2	Ncl	sp|P09405|NUCL_MOUSE Nucleolin OS=Mus musculus OX=10090 GN=Ncl PE=1 SV=2	sp|P09405|NUCL_MOUSE Nucleolin OS=Mus musculus OX=10090 GN=Ncl PE=1 SV=2	4034057	2942327	9875244	7006497	1562201	3597898	5823600	7088564	4876037	2206371	5024664	11614110	6969646	8336647	2086422	5107513	9186640	6246416	6094477	2617618	2071151	10357400	6140048	5224414	753383	3449760	12473140	9938910	6412795	2630153	3821437	7427317	15258280	2500248	6357593	5726223	5782098	7692447
P09411	PGK1_MOUSE Phosphoglycerate kinase 1 OS=Mus musculus OX=10090 GN=Pgk1 PE=1 SV=4	Pgk1	sp|P09411|PGK1_MOUSE Phosphoglycerate kinase 1 OS=Mus musculus OX=10090 GN=Pgk1 PE=1 SV=4	sp|P09411|PGK1_MOUSE Phosphoglycerate kinase 1 OS=Mus musculus OX=10090 GN=Pgk1 PE=1 SV=4	266706100	193651000	169349400	92510450	216460000	165464300	193340800	201082500	236090400	319239800	300948900	197462000	199983400	55222730	180230700	248101000	187613400	128796300	284287200	59560210	67542100	94421310	48403300	69616000	29171430	33824770	42502890	59847460	60721950	49609710	75194390	69543040	109234700	25171240	48057720	32361620	57156960	28792760
P09528	FRIH_MOUSE Ferritin heavy chain OS=Mus musculus OX=10090 GN=Fth1 PE=1 SV=2	Fth1	sp|P09528|FRIH_MOUSE Ferritin heavy chain OS=Mus musculus OX=10090 GN=Fth1 PE=1 SV=2	sp|P09528|FRIH_MOUSE Ferritin heavy chain OS=Mus musculus OX=10090 GN=Fth1 PE=1 SV=2	119605800	128561200	216188800	217409400	157686300	153005700	158585300	231683900	194843600	188776300	143912100	295649100	235013000	224946100	248240000	188282000	285868500	148567100	193841600	187567300	191560400	273968300	491353300	261207400	269502000	192123200	379989800	372220100	493861800	239629600	244572500	309985000	445500800	268388200	367171500	232152400	255142700	260234100
P09581	CSF1R_MOUSE Macrophage colony-stimulating factor 1 receptor OS=Mus musculus OX=10090 GN=Csf1r PE=1 SV=3	Csf1r	sp|P09581|CSF1R_MOUSE Macrophage colony-stimulating factor 1 receptor OS=Mus musculus OX=10090 GN=Csf1r PE=1 SV=3	sp|P09581|CSF1R_MOUSE Macrophage colony-stimulating factor 1 receptor OS=Mus musculus OX=10090 GN=Csf1r PE=1 SV=3	6456144	3734310	15148890	12893590	13145190	7123596	15486080	9684524	7173963	5424530	10907400	12372830	15664320	6257173	7507427	9186731	12051180	8675422	6153445	3869298	11789830	9567327	16244820	12182920	5023693	6927122	28084570	14570820	9945340	4876219	9400196	8097695	18781480	9974691	11177440	18604790	23914810	22819990
P09671	SODM_MOUSE Superoxide dismutase [Mn], mitochondrial OS=Mus musculus OX=10090 GN=Sod2 PE=1 SV=3	Sod2	sp|P09671|SODM_MOUSE Superoxide dismutase [Mn], mitochondrial OS=Mus musculus OX=10090 GN=Sod2 PE=1 SV=3	sp|P09671|SODM_MOUSE Superoxide dismutase [Mn], mitochondrial OS=Mus musculus OX=10090 GN=Sod2 PE=1 SV=3	933730400	649371600	599324800	380459900	1247903000	651529900	498979800	727697500	362714200	1193484000	882634200	648649100	586314100	246822900	967844300	561783400	529618100	523229000	285421200	1063322000	452299400	390522600	335913900	252950300	565834400	442433800	257595500	427007000	182444300	459908100	631211200	312157200	356912500	455632900	436841200	235662100	453190200	198789400
P09803	CADH1_MOUSE Cadherin-1 OS=Mus musculus OX=10090 GN=Cdh1 PE=1 SV=1	Cdh1	sp|P09803|CADH1_MOUSE Cadherin-1 OS=Mus musculus OX=10090 GN=Cdh1 PE=1 SV=1	sp|P09803|CADH1_MOUSE Cadherin-1 OS=Mus musculus OX=10090 GN=Cdh1 PE=1 SV=1	793906	4766596	1210409	1764601	1122530	608632	1168467	447133	1212671	2201932	1325170	1442652	1041504	1454841	1672822	1135893	2348427	2092773	648773	352999	499030	845227	30020.7	243952	584073	327156	85889.1	344222	1129344	201505	6750830	202242	1128318	6115121	7107276	963837	955978	445338
P09925	SURF1_MOUSE Surfeit locus protein 1 OS=Mus musculus OX=10090 GN=Surf1 PE=1 SV=3	Surf1	sp|P09925|SURF1_MOUSE Surfeit locus protein 1 OS=Mus musculus OX=10090 GN=Surf1 PE=1 SV=3	sp|P09925|SURF1_MOUSE Surfeit locus protein 1 OS=Mus musculus OX=10090 GN=Surf1 PE=1 SV=3	4896380	6894759	7970104	2580405	5564830	5384618	4776996	3468137	4691517	6680560	5594942	5844277	3048429	2767856	5611516	5380487	5940986	2941358	3500025	8107526	6764653	5442302	5876410	3570948	6644110	4957774	7284385	7129809	4498815	3964152	5561031	5762761	3688102	7179495	6576157	2488089	6025552	3565361
P0C0A3	CHMP6_MOUSE Charged multivesicular body protein 6 OS=Mus musculus OX=10090 GN=Chmp6 PE=1 SV=2	Chmp6	sp|P0C0A3|CHMP6_MOUSE Charged multivesicular body protein 6 OS=Mus musculus OX=10090 GN=Chmp6 PE=1 SV=2	sp|P0C0A3|CHMP6_MOUSE Charged multivesicular body protein 6 OS=Mus musculus OX=10090 GN=Chmp6 PE=1 SV=2	609495	854622	854118	578179	664547	334610	612068	722996	435760	520997	733222	1178574	500862	276105	584741	521102	769912	399616	309369	339324	417866	838390	465435	600492	111010	373931	582350	672402	369524	237738	447545	635332	423792	268536	261293	466693	311441	326468
P0DP27	CALM2_MOUSE Calmodulin-2 OS=Mus musculus OX=10090 GN=Calm2 PE=1 SV=1	Calm2	sp|P0DP27|CALM2_MOUSE Calmodulin-2 OS=Mus musculus OX=10090 GN=Calm2 PE=1 SV=1	sp|P0DP27|CALM2_MOUSE Calmodulin-2 OS=Mus musculus OX=10090 GN=Calm2 PE=1 SV=1	40143500	34634640	36995600	27458830	40244920	57452360	59168350	55532340	44165380	51951330	34800570	52525400	46910330	20418210	49243830	26034040	47614180	51853880	80737610	37074970	13665720	34040970	23387450	31258620	12950630	21733470	25163420	39771610	38027910	19576780	29603660	32060550	37198310	13745400	19510420	20426970	26363340	25981300
P0DP28	CALM3_MOUSE Calmodulin-3 OS=Mus musculus OX=10090 GN=Calm3 PE=1 SV=1	Calm3	sp|P0DP28|CALM3_MOUSE Calmodulin-3 OS=Mus musculus OX=10090 GN=Calm3 PE=1 SV=1	sp|P0DP28|CALM3_MOUSE Calmodulin-3 OS=Mus musculus OX=10090 GN=Calm3 PE=1 SV=1	40143500	34634640	36995600	27458830	40244920	57452360	59168350	55532340	44165380	51951330	34800570	52525400	46910330	20418210	49243830	26034040	47614180	51853880	80737610	37074970	13665720	34040970	23387450	31258620	12950630	21733470	25163420	39771610	38027910	19576780	29603660	32060550	37198310	13745400	19510420	20426970	26363340	25981300
P10126	EF1A1_MOUSE Elongation factor 1-alpha 1 OS=Mus musculus OX=10090 GN=Eef1a1 PE=1 SV=3	Eef1a1	sp|P10126|EF1A1_MOUSE Elongation factor 1-alpha 1 OS=Mus musculus OX=10090 GN=Eef1a1 PE=1 SV=3	sp|P10126|EF1A1_MOUSE Elongation factor 1-alpha 1 OS=Mus musculus OX=10090 GN=Eef1a1 PE=1 SV=3	2828128000	3749618000	4567649000	3922303000	2418345000	3573030000	4333977000	5651750000	5347471000	2908083000	4886643000	4415758000	4109352000	2950382000	2253436000	4146799000	4830397000	4303383000	5100256000	914851200	3099258000	4668845000	2992599000	4005813000	694729800	2037056000	1741020000	2418648000	3357642000	806081100	2350981000	2841443000	5159645000	945179800	2664439000	1889775000	2398381000	1963633000
P10493	NID1_MOUSE Nidogen-1 OS=Mus musculus OX=10090 GN=Nid1 PE=1 SV=2	Nid1	sp|P10493|NID1_MOUSE Nidogen-1 OS=Mus musculus OX=10090 GN=Nid1 PE=1 SV=2	sp|P10493|NID1_MOUSE Nidogen-1 OS=Mus musculus OX=10090 GN=Nid1 PE=1 SV=2	0	163406	366014	103033	451144	81940.9	163513	142492	35805	1634183	0	0	234771	8385.84	868735	623569	0	767271	410785	549953	591334	9804.75	661017	413856	548949	245493	455206	307535	509146	437354	138417	286714	705908	532834	166050	306170	103492	426823
P10518	HEM2_MOUSE Delta-aminolevulinic acid dehydratase OS=Mus musculus OX=10090 GN=Alad PE=1 SV=1	Alad	sp|P10518|HEM2_MOUSE Delta-aminolevulinic acid dehydratase OS=Mus musculus OX=10090 GN=Alad PE=1 SV=1	sp|P10518|HEM2_MOUSE Delta-aminolevulinic acid dehydratase OS=Mus musculus OX=10090 GN=Alad PE=1 SV=1	114016300	105104100	118640500	92206040	100509600	87261390	127648900	123076400	162478700	123059100	140676900	209606400	121879800	73023870	86649120	131513400	153890200	73852600	160088800	45425230	68453450	198602700	123687600	83247470	70072590	40349510	77641650	102321500	158623300	52494090	69017500	136804300	173262500	33465890	77743760	85067710	83753080	34815020
P10605	CATB_MOUSE Cathepsin B OS=Mus musculus OX=10090 GN=Ctsb PE=1 SV=2	Ctsb	sp|P10605|CATB_MOUSE Cathepsin B OS=Mus musculus OX=10090 GN=Ctsb PE=1 SV=2	sp|P10605|CATB_MOUSE Cathepsin B OS=Mus musculus OX=10090 GN=Ctsb PE=1 SV=2	278219400	222082700	752219700	710311800	350227800	344980900	541966600	512379600	172514600	308163300	345587500	1053444000	474860600	1013873000	425737400	219155600	995624400	293881400	189490700	1045553000	1719609000	909722700	2407509000	784822700	2309808000	2367118000	3532036000	2398649000	1870979000	734098100	1017168000	1311716000	2634280000	2279250000	2135156000	2106228000	2874933000	1921873000
P10639	THIO_MOUSE Thioredoxin OS=Mus musculus OX=10090 GN=Txn PE=1 SV=3	Txn	sp|P10639|THIO_MOUSE Thioredoxin OS=Mus musculus OX=10090 GN=Txn PE=1 SV=3	sp|P10639|THIO_MOUSE Thioredoxin OS=Mus musculus OX=10090 GN=Txn PE=1 SV=3	210999600	200637000	259384100	203112400	220696200	214762200	251652200	249122400	189030600	271172500	287041600	379370400	278824300	195461600	223965200	220831400	336133800	187773400	207621400	233614000	240855600	296095400	307792700	194432900	291946000	278894100	444429000	344640200	257006200	190412900	229811100	293769800	343035700	300306600	324364300	298297400	288451300	267040800
P10649	GSTM1_MOUSE Glutathione S-transferase Mu 1 OS=Mus musculus OX=10090 GN=Gstm1 PE=1 SV=2	Gstm1	sp|P10649|GSTM1_MOUSE Glutathione S-transferase Mu 1 OS=Mus musculus OX=10090 GN=Gstm1 PE=1 SV=2	sp|P10649|GSTM1_MOUSE Glutathione S-transferase Mu 1 OS=Mus musculus OX=10090 GN=Gstm1 PE=1 SV=2	865707600	913221400	976758300	740613700	940771300	899488700	836539200	949287800	1053121000	1042832000	1441218000	1537636000	958818000	627168500	757918400	1102241000	1550128000	614105900	887892600	380242800	711640400	885132200	739190400	656957500	581656500	448074300	871557800	823106100	683476300	460161700	720436100	882535400	1266093000	376592300	727255000	495183400	693059800	535601500
P10833	RRAS_MOUSE Ras-related protein R-Ras OS=Mus musculus OX=10090 GN=Rras PE=1 SV=1	Rras	sp|P10833|RRAS_MOUSE Ras-related protein R-Ras OS=Mus musculus OX=10090 GN=Rras PE=1 SV=1	sp|P10833|RRAS_MOUSE Ras-related protein R-Ras OS=Mus musculus OX=10090 GN=Rras PE=1 SV=1	20217430	19211900	21984320	22020340	15517460	19066780	20161510	24555950	20281620	16998200	21260400	26844090	28199010	22685890	17308040	21883200	18239160	19422700	26622690	15329430	23245820	31372470	23589350	24167730	13073220	16037240	27456120	31061630	19108730	16605270	23103790	26163830	37032900	16836900	18248800	22849400	24525050	21646620
P10852	4F2_MOUSE 4F2 cell-surface antigen heavy chain OS=Mus musculus OX=10090 GN=Slc3a2 PE=1 SV=1	Slc3a2	sp|P10852|4F2_MOUSE 4F2 cell-surface antigen heavy chain OS=Mus musculus OX=10090 GN=Slc3a2 PE=1 SV=1	sp|P10852|4F2_MOUSE 4F2 cell-surface antigen heavy chain OS=Mus musculus OX=10090 GN=Slc3a2 PE=1 SV=1	48794210	43950360	124280900	90475310	46263900	58618080	56931300	82920800	48747790	60731550	55686930	69253570	87941010	78063060	43197010	54156100	70762470	60438200	73825270	225935200	45374340	84338310	66589060	64770540	22988660	40412650	148654200	134316400	68198610	35081780	49112840	87217040	106585100	47260530	62308470	81897290	77627420	143001700
P10854	H2B1M_MOUSE Histone H2B type 1-M OS=Mus musculus OX=10090 GN=Hist1h2bm PE=1 SV=2	Hist1h2bm	sp|P10854|H2B1M_MOUSE Histone H2B type 1-M OS=Mus musculus OX=10090 GN=Hist1h2bm PE=1 SV=2	sp|P10854|H2B1M_MOUSE Histone H2B type 1-M OS=Mus musculus OX=10090 GN=Hist1h2bm PE=1 SV=2	623787000	194039200	617523100	137535700	291806900	232861600	336084300	317283600	230298600	322325100	278334300	426531900	433105600	95900540	211472300	176649100	421572400	107589900	233637600	472473500	103897600	285079200	167981600	107179400	63804250	168302800	249139400	257915300	221517700	113207900	114962100	267891800	176863300	61206500	216820100	117092500	151473600	71875630
P10922	H10_MOUSE Histone H1.0 OS=Mus musculus OX=10090 GN=H1f0 PE=2 SV=4	H1f0	sp|P10922|H10_MOUSE Histone H1.0 OS=Mus musculus OX=10090 GN=H1f0 PE=2 SV=4	sp|P10922|H10_MOUSE Histone H1.0 OS=Mus musculus OX=10090 GN=H1f0 PE=2 SV=4	1666785	617962	4346066	356640	347337	195116	1293510	1934521	538524	695720	282659	47355.3	1390849	59733.6	328502	232296	1746026	709119	631072	71471.9	129880	215281	98572.4	76239.4	116104	62982	98815.5	142611	378476	304269	54252.9	234284	111304	88753.1	203257	102117	102360	272013
P11032	GRAA_MOUSE Granzyme A OS=Mus musculus OX=10090 GN=Gzma PE=1 SV=2	Gzma	sp|P11032|GRAA_MOUSE Granzyme A OS=Mus musculus OX=10090 GN=Gzma PE=1 SV=2	sp|P11032|GRAA_MOUSE Granzyme A OS=Mus musculus OX=10090 GN=Gzma PE=1 SV=2	1064832	551662	1013470	658113	907312	627193	500432	902647	664952	969680	551427	657780	624086	520337	681179	974192	1437925	186756	379285	464133	302559	599593	276288	151385	378151	125832	1542787	408341	311879	307430	459496	420990	41262.8	534081	855404	142335	362440	1820211
P11087	CO1A1_MOUSE Collagen alpha-1(I) chain OS=Mus musculus OX=10090 GN=Col1a1 PE=1 SV=4	Col1a1	sp|P11087|CO1A1_MOUSE Collagen alpha-1(I) chain OS=Mus musculus OX=10090 GN=Col1a1 PE=1 SV=4	sp|P11087|CO1A1_MOUSE Collagen alpha-1(I) chain OS=Mus musculus OX=10090 GN=Col1a1 PE=1 SV=4	1793336	1304674	831539	297990	1613399	1083645	1385674	1898251	1365023	1574425	2457737	1605782	1152830	342355	4107169	1600101	1567290	1456938	974911	1383909	1120655	559992	555364	943392	1924891	996081	3059991	668567	530366	1089677	348994	1383797	1103586	869689	1203247	200836	767854	2338259
P11152	LIPL_MOUSE Lipoprotein lipase OS=Mus musculus OX=10090 GN=Lpl PE=1 SV=3	Lpl	sp|P11152|LIPL_MOUSE Lipoprotein lipase OS=Mus musculus OX=10090 GN=Lpl PE=1 SV=3	sp|P11152|LIPL_MOUSE Lipoprotein lipase OS=Mus musculus OX=10090 GN=Lpl PE=1 SV=3	3583709	804090	1124379	776492	4134819	1858145	3838987	2314487	837477	2754864	1193078	1143056	2088038	239252	735940	2379877	894942	3194803	3609717	465584	1998023	2257968	1993085	512361	432060	174211	373705	798025	848978	1354780	533672	589467	157880	403611	304307	710419	581901	837715
P11247	PERM_MOUSE Myeloperoxidase OS=Mus musculus OX=10090 GN=Mpo PE=1 SV=2	Mpo	sp|P11247|PERM_MOUSE Myeloperoxidase OS=Mus musculus OX=10090 GN=Mpo PE=1 SV=2	sp|P11247|PERM_MOUSE Myeloperoxidase OS=Mus musculus OX=10090 GN=Mpo PE=1 SV=2	4958085	6500465	19786460	12919260	4085073	5690780	5996019	6799181	3314971	4412321	5591988	11386180	12673610	21878870	4483597	4391230	14196680	5234232	8449375	2530947	6439875	6745517	12780040	12048700	2080664	5419708	9503787	48401820	3517485	2596987	4063387	4645258	4472967	7923163	3159831	5078196	4748804	13866000
P11276	FINC_MOUSE Fibronectin OS=Mus musculus OX=10090 GN=Fn1 PE=1 SV=4	Fn1	sp|P11276|FINC_MOUSE Fibronectin OS=Mus musculus OX=10090 GN=Fn1 PE=1 SV=4	sp|P11276|FINC_MOUSE Fibronectin OS=Mus musculus OX=10090 GN=Fn1 PE=1 SV=4	350053300	316256900	362278000	228087700	500015200	446816600	521710000	479532000	321720500	559584500	415185600	230751700	287226400	411219500	456531300	542509600	418935000	365328900	439731400	155954200	368921200	319936000	278251200	281679800	169955100	207642400	534251800	390127500	326040300	152483500	269978800	319062500	487174000	262855400	332877600	344772600	277369700	318338800
P11352	GPX1_MOUSE Glutathione peroxidase 1 OS=Mus musculus OX=10090 GN=Gpx1 PE=1 SV=2	Gpx1	sp|P11352|GPX1_MOUSE Glutathione peroxidase 1 OS=Mus musculus OX=10090 GN=Gpx1 PE=1 SV=2	sp|P11352|GPX1_MOUSE Glutathione peroxidase 1 OS=Mus musculus OX=10090 GN=Gpx1 PE=1 SV=2	2497864000	1499367000	558160900	618879300	2163597000	1576274000	1479736000	1484223000	836436400	2407150000	1862915000	2224453000	1245182000	383535900	1923237000	1558094000	1376366000	1065255000	960835100	2303775000	1298373000	1467894000	1016443000	571620400	1210982000	1597917000	1241303000	955929400	751468500	1426680000	1072670000	1057558000	972507800	1709271000	1909447000	1077502000	1092014000	451988600
P11438	LAMP1_MOUSE Lysosome-associated membrane glycoprotein 1 OS=Mus musculus OX=10090 GN=Lamp1 PE=1 SV=2	Lamp1	sp|P11438|LAMP1_MOUSE Lysosome-associated membrane glycoprotein 1 OS=Mus musculus OX=10090 GN=Lamp1 PE=1 SV=2	sp|P11438|LAMP1_MOUSE Lysosome-associated membrane glycoprotein 1 OS=Mus musculus OX=10090 GN=Lamp1 PE=1 SV=2	44855570	47840980	123591200	105195300	66618600	63953080	88885050	99102410	49342980	70005840	53667930	106393800	80534070	102436100	97526440	57463590	105903900	75109640	55122660	103159900	137808400	160773700	149859400	107398500	158216300	135739300	306791300	204779300	176542000	107713300	98926840	144660500	179907700	178497300	162590700	190843700	176497100	242600900
P11499	HS90B_MOUSE Heat shock protein HSP 90-beta OS=Mus musculus OX=10090 GN=Hsp90ab1 PE=1 SV=3	Hsp90ab1	sp|P11499|HS90B_MOUSE Heat shock protein HSP 90-beta OS=Mus musculus OX=10090 GN=Hsp90ab1 PE=1 SV=3	sp|P11499|HS90B_MOUSE Heat shock protein HSP 90-beta OS=Mus musculus OX=10090 GN=Hsp90ab1 PE=1 SV=3	936025600	565230900	867147900	585680900	701820000	571466000	787405200	773472500	794772500	1144985000	882262200	782104500	848276400	413572300	731568400	797102300	915757600	533985600	1066846000	203278400	294232000	965742600	560457600	377547000	298939300	260900200	771211800	694630700	661694800	305880500	376279900	717630300	644756600	238820100	360952700	543935100	430906700	437996800
P11531	DMD_MOUSE Dystrophin OS=Mus musculus OX=10090 GN=Dmd PE=1 SV=3	Dmd	sp|P11531|DMD_MOUSE Dystrophin OS=Mus musculus OX=10090 GN=Dmd PE=1 SV=3	sp|P11531|DMD_MOUSE Dystrophin OS=Mus musculus OX=10090 GN=Dmd PE=1 SV=3	1356513	2294317	2666400	2037731	1608787	1287984	2573402	3767458	1866054	2715324	1981777	4675802	2977159	3086981	2057312	1467947	2945329	2486658	3648183	1577639	1576167	2024611	2544897	2672693	1389057	1815812	1827932	4370552	5114837	1281245	2396956	3029061	6134361	2106633	2225206	1902399	3072991	2091836
P11589	MUP2_MOUSE Major urinary protein 2 OS=Mus musculus OX=10090 GN=Mup2 PE=1 SV=1	Mup2	sp|P11589|MUP2_MOUSE Major urinary protein 2 OS=Mus musculus OX=10090 GN=Mup2 PE=1 SV=1	sp|P11589|MUP2_MOUSE Major urinary protein 2 OS=Mus musculus OX=10090 GN=Mup2 PE=1 SV=1	140259600	118814700	51220360	108732600	68040350	101062100	335241800	265078300	114117200	168313900	187170700	223217000	82854460	178587100	186254700	127945800	160810700	192705000	249136700	97971620	85921640	367651500	200986700	181125800	120202400	215691400	217688400	307201900	287347500	133563100	175272300	191597400	329378600	185798000	257879000	247611700	350698000	117353500
P11609	CD1D1_MOUSE Antigen-presenting glycoprotein CD1d1 OS=Mus musculus OX=10090 GN=Cd1d1 PE=1 SV=3	Cd1d1	sp|P11609|CD1D1_MOUSE Antigen-presenting glycoprotein CD1d1 OS=Mus musculus OX=10090 GN=Cd1d1 PE=1 SV=3	sp|P11609|CD1D1_MOUSE Antigen-presenting glycoprotein CD1d1 OS=Mus musculus OX=10090 GN=Cd1d1 PE=1 SV=3	24140760	27146770	31628510	33674140	27561170	31563390	37745050	65966230	35880440	37167650	28136300	34210260	32198270	25383830	39477330	37678840	30909250	39902610	42911870	12108980	32205410	36454600	47082520	38491880	22071440	19414850	38984320	37845010	67845870	17182640	26588080	29022010	72429540	23073800	29194950	42256230	43959340	28993160
P11672	NGAL_MOUSE Neutrophil gelatinase-associated lipocalin OS=Mus musculus OX=10090 GN=Lcn2 PE=1 SV=1	Lcn2	sp|P11672|NGAL_MOUSE Neutrophil gelatinase-associated lipocalin OS=Mus musculus OX=10090 GN=Lcn2 PE=1 SV=1	sp|P11672|NGAL_MOUSE Neutrophil gelatinase-associated lipocalin OS=Mus musculus OX=10090 GN=Lcn2 PE=1 SV=1	21351230	20761690	25601090	17947210	6315086	13081000	5770885	3735195	2857367	8653741	10172130	31626770	23870840	52631790	25788980	27488940	37169330	6663711	32037180	6960889	17732840	9536933	21565770	22134950	1314448	27294170	13006120	135242500	8051090	2160345	11958730	8675698	5205222	55618740	3410809	8685868	10002700	31763150
P11679	K2C8_MOUSE Keratin, type II cytoskeletal 8 OS=Mus musculus OX=10090 GN=Krt8 PE=1 SV=4	Krt8	sp|P11679|K2C8_MOUSE Keratin, type II cytoskeletal 8 OS=Mus musculus OX=10090 GN=Krt8 PE=1 SV=4	sp|P11679|K2C8_MOUSE Keratin, type II cytoskeletal 8 OS=Mus musculus OX=10090 GN=Krt8 PE=1 SV=4	1277844000	441511800	525601300	347844900	639782200	483577800	308897100	307474600	312240800	942524700	411347800	655991700	405827300	156293600	545796800	202187700	528230100	240138400	296549000	747822200	198784600	486916200	368265600	175543100	409790800	494271900	675247500	399831700	341061800	409511900	371622300	489793400	317563800	556874200	608146200	314967200	361785100	277506100
P11688	ITA5_MOUSE Integrin alpha-5 OS=Mus musculus OX=10090 GN=Itga5 PE=1 SV=3	Itga5	sp|P11688|ITA5_MOUSE Integrin alpha-5 OS=Mus musculus OX=10090 GN=Itga5 PE=1 SV=3	sp|P11688|ITA5_MOUSE Integrin alpha-5 OS=Mus musculus OX=10090 GN=Itga5 PE=1 SV=3	32028000	47664440	37517720	38775780	28865600	29889670	27895930	29047390	28164730	37544830	55934680	59228350	44793360	70705390	20754640	49992570	54729280	27232000	41475960	30444480	71679240	82613010	54150860	58791010	29788470	29528710	81815050	59434260	64485500	27261230	59242390	79178410	126810800	30440770	52977100	40878100	41469080	38082850
P11714	CP2D9_MOUSE Cytochrome P450 2D9 OS=Mus musculus OX=10090 GN=Cyp2d9 PE=1 SV=2	Cyp2d9	sp|P11714|CP2D9_MOUSE Cytochrome P450 2D9 OS=Mus musculus OX=10090 GN=Cyp2d9 PE=1 SV=2	sp|P11714|CP2D9_MOUSE Cytochrome P450 2D9 OS=Mus musculus OX=10090 GN=Cyp2d9 PE=1 SV=2	16534510	29790690	165786500	239689100	16650230	34517190	66850950	53539570	26811960	33169580	41368580	50990690	76087000	79036570	24851430	44045820	81749860	22451010	43034450	23625740	27045890	70893660	56142580	36458440	28590490	41782380	313896200	216957300	26127310	18676650	30408070	110096300	39388750	23255930	41298690	75070810	46737590	125128400
P11725	OTC_MOUSE Ornithine carbamoyltransferase, mitochondrial OS=Mus musculus OX=10090 GN=Otc PE=1 SV=1	Otc	sp|P11725|OTC_MOUSE Ornithine carbamoyltransferase, mitochondrial OS=Mus musculus OX=10090 GN=Otc PE=1 SV=1	sp|P11725|OTC_MOUSE Ornithine carbamoyltransferase, mitochondrial OS=Mus musculus OX=10090 GN=Otc PE=1 SV=1	11417860000	7089420000	5180227000	3145317000	11960450000	6887087000	4823063000	7348126000	3447378000	11879200000	8263642000	7656921000	5338039000	2080313000	9534033000	5282614000	5446163000	4448947000	3047421000	7657392000	4988067000	6306473000	4504558000	2442205000	7781438000	6421976000	4599960000	4715293000	2204850000	7704399000	6816657000	4381343000	4242526000	6851955000	5316736000	3744574000	5133910000	2000321000
P11835	ITB2_MOUSE Integrin beta-2 OS=Mus musculus OX=10090 GN=Itgb2 PE=1 SV=2	Itgb2	sp|P11835|ITB2_MOUSE Integrin beta-2 OS=Mus musculus OX=10090 GN=Itgb2 PE=1 SV=2	sp|P11835|ITB2_MOUSE Integrin beta-2 OS=Mus musculus OX=10090 GN=Itgb2 PE=1 SV=2	12804420	11249410	37311050	27995560	10154530	13675840	26444490	17850130	13434620	13920090	17714390	22459560	34619970	22602350	14892280	11572860	24787340	12223080	14533390	6004274	15019230	14224240	16639070	11183020	4548812	7997225	37877150	36232810	10497660	6840191	14907510	18115500	19148970	11271310	11284940	18686820	19674480	38413220
P11859	ANGT_MOUSE Angiotensinogen OS=Mus musculus OX=10090 GN=Agt PE=1 SV=1	Agt	sp|P11859|ANGT_MOUSE Angiotensinogen OS=Mus musculus OX=10090 GN=Agt PE=1 SV=1	sp|P11859|ANGT_MOUSE Angiotensinogen OS=Mus musculus OX=10090 GN=Agt PE=1 SV=1	4483779	10627930	8864062	8121531	7845479	12057810	10159120	20169630	12764990	6500194	9739900	14533130	9379195	9501335	10865850	9118127	13841230	12387470	12966460	4418410	8440038	15673210	20071970	13233390	4714288	13966200	18373250	13758290	16077240	2623211	6268147	12880120	22709190	7464293	7634457	11096990	11121580	9877315
P11881	ITPR1_MOUSE Inositol 1,4,5-trisphosphate receptor type 1 OS=Mus musculus OX=10090 GN=Itpr1 PE=1 SV=2	Itpr1	sp|P11881|ITPR1_MOUSE Inositol 1,4,5-trisphosphate receptor type 1 OS=Mus musculus OX=10090 GN=Itpr1 PE=1 SV=2	sp|P11881|ITPR1_MOUSE Inositol 1,4,5-trisphosphate receptor type 1 OS=Mus musculus OX=10090 GN=Itpr1 PE=1 SV=2	1896757	7203435	4570047	2305114	1863664	1664486	3429062	5869266	1974713	1837934	2303866	2767254	2031135	3025405	1514866	1782778	3261739	2942443	3243518	3423908	4394216	4337514	3639049	4147632	2614002	1273121	4226375	2556592	2491750	1124276	1136315	2636001	6184921	1652243	2487562	2671660	4119964	6961753
P11928	OAS1A_MOUSE 2'-5'-oligoadenylate synthase 1A OS=Mus musculus OX=10090 GN=Oas1a PE=1 SV=2	Oas1a	sp|P11928|OAS1A_MOUSE 2'-5'-oligoadenylate synthase 1A OS=Mus musculus OX=10090 GN=Oas1a PE=1 SV=2	sp|P11928|OAS1A_MOUSE 2'-5'-oligoadenylate synthase 1A OS=Mus musculus OX=10090 GN=Oas1a PE=1 SV=2	3637567	5666171	53976880	22693010	4665981	4268186	9891836	8727653	3591398	4991858	10397790	13930420	27841500	18994270	2398828	5473854	16293600	5300299	5362011	4563534	6591938	13452120	5913718	4681858	3302122	3966455	65618620	67203240	8845473	3380439	6796606	18459140	8634541	6416838	6979762	16222880	9813483	46968100
P11930	NUD19_MOUSE Nucleoside diphosphate-linked moiety X motif 19 OS=Mus musculus OX=10090 GN=Nudt19 PE=1 SV=2	Nudt19	sp|P11930|NUD19_MOUSE Nucleoside diphosphate-linked moiety X motif 19 OS=Mus musculus OX=10090 GN=Nudt19 PE=1 SV=2	sp|P11930|NUD19_MOUSE Nucleoside diphosphate-linked moiety X motif 19 OS=Mus musculus OX=10090 GN=Nudt19 PE=1 SV=2	619766000	732266000	1008729000	1001541000	620737100	846700100	822842200	694867100	675145200	581651400	944845700	1259742000	771726800	585689900	762517500	749002200	726656400	773882000	695748100	1296069000	1274114000	1131272000	1032813000	715858100	1302617000	1304208000	1363173000	1306160000	885489900	781972200	767693900	1008413000	1314802000	841643100	1370045000	998602200	928828600	1130720000
P11983	TCPA_MOUSE T-complex protein 1 subunit alpha OS=Mus musculus OX=10090 GN=Tcp1 PE=1 SV=3	Tcp1	sp|P11983|TCPA_MOUSE T-complex protein 1 subunit alpha OS=Mus musculus OX=10090 GN=Tcp1 PE=1 SV=3	sp|P11983|TCPA_MOUSE T-complex protein 1 subunit alpha OS=Mus musculus OX=10090 GN=Tcp1 PE=1 SV=3	171622500	105814400	146862600	125227300	184885900	141946400	174646500	179765500	194601600	169184300	125217700	213583100	198191400	94299160	169010600	149357400	217840000	192067100	240395900	71345390	72216170	268416500	128148000	96809830	77553810	135487100	150536800	140231300	173527600	69309940	80247910	174523800	142474500	66280000	115425000	106280400	116981200	82869650
P12023	A4_MOUSE Amyloid-beta A4 protein OS=Mus musculus OX=10090 GN=App PE=1 SV=3	App	sp|P12023|A4_MOUSE Amyloid-beta A4 protein OS=Mus musculus OX=10090 GN=App PE=1 SV=3	sp|P12023|A4_MOUSE Amyloid-beta A4 protein OS=Mus musculus OX=10090 GN=App PE=1 SV=3	1282814	6400640	2573038	2531064	4225038	3839113	3684808	4438414	2117941	6925251	5732332	6129460	2514903	692698	6215084	5093317	2110091	3818045	3007589	3963399	1524028	4340334	1709433	2278359	2504031	2912330	3915591	1925699	1690883	1941579	705661	2259687	2753210	2174154	579841	1247547	2188947	2023251
P12246	SAMP_MOUSE Serum amyloid P-component OS=Mus musculus OX=10090 GN=Apcs PE=1 SV=2	Apcs	sp|P12246|SAMP_MOUSE Serum amyloid P-component OS=Mus musculus OX=10090 GN=Apcs PE=1 SV=2	sp|P12246|SAMP_MOUSE Serum amyloid P-component OS=Mus musculus OX=10090 GN=Apcs PE=1 SV=2	402870	446430	1509748	470301	87434	269079	933787	168280	1019415	328912	143769	211776	1579764	1699029	1414759	1204652	1505335	1001968	1571489	284350	445228	302388	62156.3	278820	401851	132747	462959	1767569	488868	501849	614476	102042	1325093	654214	274978	1090153	248416	666381
P12265	BGLR_MOUSE Beta-glucuronidase OS=Mus musculus OX=10090 GN=Gusb PE=1 SV=2	Gusb	sp|P12265|BGLR_MOUSE Beta-glucuronidase OS=Mus musculus OX=10090 GN=Gusb PE=1 SV=2	sp|P12265|BGLR_MOUSE Beta-glucuronidase OS=Mus musculus OX=10090 GN=Gusb PE=1 SV=2	32192540	45031540	109204500	107990000	35504620	47319410	69932240	85401620	52561860	38001530	45038360	139932000	67605240	141135200	43786070	41487890	123769100	54039800	52168140	139168300	232999200	195673300	255146600	120032000	314367400	263033800	394025900	270491500	224951500	135817700	132713300	193782900	277876300	365951200	325033800	260939700	272501300	290160900
P12367	KAP2_MOUSE cAMP-dependent protein kinase type II-alpha regulatory subunit OS=Mus musculus OX=10090 GN=Prkar2a PE=1 SV=2	Prkar2a	sp|P12367|KAP2_MOUSE cAMP-dependent protein kinase type II-alpha regulatory subunit OS=Mus musculus OX=10090 GN=Prkar2a PE=1 SV=2	sp|P12367|KAP2_MOUSE cAMP-dependent protein kinase type II-alpha regulatory subunit OS=Mus musculus OX=10090 GN=Prkar2a PE=1 SV=2	5814004	13301170	12733610	14181510	8229236	7022540	15170350	18078190	14421480	6551704	11850110	19195520	9963724	12190560	5378255	7665367	18094870	12523080	13662660	4065712	11881090	23351570	17820750	16403000	4838906	10003460	20694980	15518180	17906230	2721727	7280699	19509340	24452500	5276197	11250560	19769540	14884290	14679120
P12382	PFKAL_MOUSE ATP-dependent 6-phosphofructokinase, liver type OS=Mus musculus OX=10090 GN=Pfkl PE=1 SV=4	Pfkl	sp|P12382|PFKAL_MOUSE ATP-dependent 6-phosphofructokinase, liver type OS=Mus musculus OX=10090 GN=Pfkl PE=1 SV=4	sp|P12382|PFKAL_MOUSE ATP-dependent 6-phosphofructokinase, liver type OS=Mus musculus OX=10090 GN=Pfkl PE=1 SV=4	5918486	5664728	11125010	5767793	6599499	3868317	8470953	10343750	9139185	6306266	9020096	10444140	10138370	6718361	4442236	7911723	8002829	6066231	9325389	2321167	5790071	10187650	8479132	5142547	2649520	2348286	9846802	7708004	10007910	3275200	3994157	7187571	12448350	2531998	3422224	5648890	6651738	6234487
P12710	FABPL_MOUSE Fatty acid-binding protein, liver OS=Mus musculus OX=10090 GN=Fabp1 PE=1 SV=2	Fabp1	sp|P12710|FABPL_MOUSE Fatty acid-binding protein, liver OS=Mus musculus OX=10090 GN=Fabp1 PE=1 SV=2	sp|P12710|FABPL_MOUSE Fatty acid-binding protein, liver OS=Mus musculus OX=10090 GN=Fabp1 PE=1 SV=2	6874561000	4450345000	3260632000	1791850000	6059694000	4830196000	5157832000	4278639000	6199647000	9025931000	6382625000	3198882000	3637120000	1059862000	5202788000	7031667000	4191715000	3828426000	6818214000	844043600	1148495000	1028305000	884660000	1179133000	529547100	605888200	557273000	769461000	983909600	593274000	1427432000	1106861000	1553993000	475633900	1080490000	566998600	650354900	588164500
P12787	COX5A_MOUSE Cytochrome c oxidase subunit 5A, mitochondrial OS=Mus musculus OX=10090 GN=Cox5a PE=1 SV=2	Cox5a	sp|P12787|COX5A_MOUSE Cytochrome c oxidase subunit 5A, mitochondrial OS=Mus musculus OX=10090 GN=Cox5a PE=1 SV=2	sp|P12787|COX5A_MOUSE Cytochrome c oxidase subunit 5A, mitochondrial OS=Mus musculus OX=10090 GN=Cox5a PE=1 SV=2	1125031000	962355400	884599800	672464200	1620621000	959534100	773392700	1302165000	733064000	1545771000	1153479000	1091055000	840943000	334351500	1173401000	771625100	891174200	832725200	691776500	1028430000	473613000	273473000	376497200	421585400	332493300	280749200	153490000	356404200	209684200	249642700	756262600	300658200	458050600	252986900	402615800	147099500	384477000	161197200
P12790	CP2B9_MOUSE Cytochrome P450 2B9 OS=Mus musculus OX=10090 GN=Cyp2b9 PE=1 SV=2	Cyp2b9	sp|P12790|CP2B9_MOUSE Cytochrome P450 2B9 OS=Mus musculus OX=10090 GN=Cyp2b9 PE=1 SV=2	sp|P12790|CP2B9_MOUSE Cytochrome P450 2B9 OS=Mus musculus OX=10090 GN=Cyp2b9 PE=1 SV=2	65949420	141268800	118539500	122139400	73046800	107107900	121563100	240518900	139239800	66760870	124737200	187373400	87463110	80962110	84968020	104936000	130262500	122442300	137485200	37079210	127025900	215054300	305487200	200691200	64903310	152181700	190653100	172340800	202919300	75674270	96633870	195252700	331945400	129934000	156257900	187260300	203904300	105241800
P12791	CP2BA_MOUSE Cytochrome P450 2B10 OS=Mus musculus OX=10090 GN=Cyp2b10 PE=1 SV=1	Cyp2b10	sp|P12791|CP2BA_MOUSE Cytochrome P450 2B10 OS=Mus musculus OX=10090 GN=Cyp2b10 PE=1 SV=1	sp|P12791|CP2BA_MOUSE Cytochrome P450 2B10 OS=Mus musculus OX=10090 GN=Cyp2b10 PE=1 SV=1	66402160	134566100	130738000	88796570	59671680	127417600	92401840	186087900	128361800	52264110	124103600	162140400	86035200	85069020	72943010	107564000	150128200	92854610	95809500	38626080	103894600	179045800	202506700	150691300	83862030	146836100	201583000	205950400	173930800	65549780	86800520	148242900	326768600	115360900	126499000	165414500	156753800	120471700
P12815	PDCD6_MOUSE Programmed cell death protein 6 OS=Mus musculus OX=10090 GN=Pdcd6 PE=1 SV=2	Pdcd6	sp|P12815|PDCD6_MOUSE Programmed cell death protein 6 OS=Mus musculus OX=10090 GN=Pdcd6 PE=1 SV=2	sp|P12815|PDCD6_MOUSE Programmed cell death protein 6 OS=Mus musculus OX=10090 GN=Pdcd6 PE=1 SV=2	46011720	28529530	54215890	49297440	51179490	53591620	52580100	74926380	55509660	58838150	32143630	57795270	67909520	26446490	57255630	35952800	45668870	62163670	68429850	35196210	20431770	67726040	57556410	35739680	46556330	49918090	56779290	56770380	62218440	38045320	30843040	48319460	38257450	52145860	55886920	48972030	49527690	39448950
P12970	RL7A_MOUSE 60S ribosomal protein L7a OS=Mus musculus OX=10090 GN=Rpl7a PE=1 SV=2	Rpl7a	sp|P12970|RL7A_MOUSE 60S ribosomal protein L7a OS=Mus musculus OX=10090 GN=Rpl7a PE=1 SV=2	sp|P12970|RL7A_MOUSE 60S ribosomal protein L7a OS=Mus musculus OX=10090 GN=Rpl7a PE=1 SV=2	127053300	497625100	652916300	640687600	196765600	424383000	629463000	812758800	781519000	78764730	528899800	586856300	478107300	532214400	187676900	487707000	710497400	554952800	644944900	70349180	463197000	657009500	607130800	670335200	70855840	240747700	600937900	598675100	645344400	58314960	335351500	469471200	1042248000	131584100	347236700	504083200	437189600	471630700
P13020	GELS_MOUSE Gelsolin OS=Mus musculus OX=10090 GN=Gsn PE=1 SV=3	Gsn	sp|P13020|GELS_MOUSE Gelsolin OS=Mus musculus OX=10090 GN=Gsn PE=1 SV=3	sp|P13020|GELS_MOUSE Gelsolin OS=Mus musculus OX=10090 GN=Gsn PE=1 SV=3	10159010	19279710	10801910	6197109	16718100	15515610	18728640	15702510	11051970	22544430	27419790	8255543	8933049	16177770	15441540	31251250	8117511	12774900	16785490	9683918	27208480	6627345	7633334	17967180	3977833	2634566	6130072	7029544	5326885	3642423	17323570	5885515	35927470	5253468	6684838	4661260	6822572	5168688
P13516	ACOD1_MOUSE Acyl-CoA desaturase 1 OS=Mus musculus OX=10090 GN=Scd1 PE=1 SV=2	Scd1	sp|P13516|ACOD1_MOUSE Acyl-CoA desaturase 1 OS=Mus musculus OX=10090 GN=Scd1 PE=1 SV=2	sp|P13516|ACOD1_MOUSE Acyl-CoA desaturase 1 OS=Mus musculus OX=10090 GN=Scd1 PE=1 SV=2	23632100	57651980	31745260	21898510	32202760	70253700	38983850	41255910	55023910	15589660	58467670	53108780	26696430	24061320	18247220	35127680	66158580	16947920	48784200	14373650	137903700	49999320	38331450	26542490	37131640	53976170	116079700	43891340	35346160	25376810	47105840	68954100	55442900	27518470	65451900	60185970	23576140	29834030
P13542	MYH8_MOUSE Myosin-8 OS=Mus musculus OX=10090 GN=Myh8 PE=2 SV=2	Myh8	sp|P13542|MYH8_MOUSE Myosin-8 OS=Mus musculus OX=10090 GN=Myh8 PE=2 SV=2	sp|P13542|MYH8_MOUSE Myosin-8 OS=Mus musculus OX=10090 GN=Myh8 PE=2 SV=2	1847461	344959	169324	431222	225200	360552	587168	886919	259412	4134737	1308352	447952	406219	248473	120927	1615476	432465	140904	246769	148598	262675	212866	255333	232118	46912.6	2627229	375598	496014	315530	74072	64582.8	434993	558734	115793	1165638	551258	128665	253521
P13597	ICAM1_MOUSE Intercellular adhesion molecule 1 OS=Mus musculus OX=10090 GN=Icam1 PE=1 SV=1	Icam1	sp|P13597|ICAM1_MOUSE Intercellular adhesion molecule 1 OS=Mus musculus OX=10090 GN=Icam1 PE=1 SV=1	sp|P13597|ICAM1_MOUSE Intercellular adhesion molecule 1 OS=Mus musculus OX=10090 GN=Icam1 PE=1 SV=1	19107370	26458720	71014330	52487690	21669830	30794420	35268320	28985870	18196360	21791420	27235200	62202040	64765920	74303430	20889740	25723990	61295270	32150860	30929010	26395230	30093370	59778370	38072230	33847810	20239130	23846370	115783900	103180200	50626030	19284030	42187160	80592270	75300720	37570400	44529690	59236610	44152970	92945490
P13634	CAH1_MOUSE Carbonic anhydrase 1 OS=Mus musculus OX=10090 GN=Ca1 PE=1 SV=4	Ca1	sp|P13634|CAH1_MOUSE Carbonic anhydrase 1 OS=Mus musculus OX=10090 GN=Ca1 PE=1 SV=4	sp|P13634|CAH1_MOUSE Carbonic anhydrase 1 OS=Mus musculus OX=10090 GN=Ca1 PE=1 SV=4	844035	5124562	1310141	508216	992191	319930	529537	345849	863156	607844	996254	214424	540996	394022	646631	496666	699856	1064638	725375	1488689	1715353	231286	500274	585017	633238	384945	441058	336667	345087	272160	481996	331152	1099322	365426	455284	377882	503029	825506
P13707	GPDA_MOUSE Glycerol-3-phosphate dehydrogenase [NAD(+)], cytoplasmic OS=Mus musculus OX=10090 GN=Gpd1 PE=1 SV=3	Gpd1	sp|P13707|GPDA_MOUSE Glycerol-3-phosphate dehydrogenase [NAD(+)], cytoplasmic OS=Mus musculus OX=10090 GN=Gpd1 PE=1 SV=3	sp|P13707|GPDA_MOUSE Glycerol-3-phosphate dehydrogenase [NAD(+)], cytoplasmic OS=Mus musculus OX=10090 GN=Gpd1 PE=1 SV=3	1114948000	1022936000	1345310000	1635325000	1190040000	1071248000	1540332000	1391940000	1184716000	1177500000	2202730000	1737285000	1749021000	1174332000	1421860000	1357656000	1416926000	1393512000	1388643000	1125034000	1281837000	1578103000	1692118000	1270510000	1600266000	1549832000	1783406000	1610786000	1650618000	1121566000	1062125000	1298265000	1963297000	1445976000	1685454000	1337613000	1521500000	1431842000
P14094	AT1B1_MOUSE Sodium/potassium-transporting ATPase subunit beta-1 OS=Mus musculus OX=10090 GN=Atp1b1 PE=1 SV=1	Atp1b1	sp|P14094|AT1B1_MOUSE Sodium/potassium-transporting ATPase subunit beta-1 OS=Mus musculus OX=10090 GN=Atp1b1 PE=1 SV=1	sp|P14094|AT1B1_MOUSE Sodium/potassium-transporting ATPase subunit beta-1 OS=Mus musculus OX=10090 GN=Atp1b1 PE=1 SV=1	393900500	378957400	251577600	239370800	199713500	222848700	263992600	260500000	246418400	271829500	458413900	580881700	279604200	427215200	201769000	332182400	355515500	256045700	318128500	1953852000	510924700	484854800	424975200	502252400	285886700	305977300	442404600	434656700	478727100	261360600	433554800	452981300	961635100	269882200	383661400	281089100	437331700	251409700
P14106	C1QB_MOUSE Complement C1q subcomponent subunit B OS=Mus musculus OX=10090 GN=C1qb PE=1 SV=2	C1qb	sp|P14106|C1QB_MOUSE Complement C1q subcomponent subunit B OS=Mus musculus OX=10090 GN=C1qb PE=1 SV=2	sp|P14106|C1QB_MOUSE Complement C1q subcomponent subunit B OS=Mus musculus OX=10090 GN=C1qb PE=1 SV=2	3599692	2783071	10851280	9576838	5147925	6640354	8820065	3638838	4917867	7406088	7535448	2990309	10520850	5006568	4724413	4690363	6018075	2850292	6983556	835505	3291379	2762400	1995035	2911204	393550	1131457	6114255	6302998	1847753	1226400	2090245	2665981	3408492	771731	1645815	2142749	2550729	7073831
P14115	RL27A_MOUSE 60S ribosomal protein L27a OS=Mus musculus OX=10090 GN=Rpl27a PE=1 SV=5	Rpl27a	sp|P14115|RL27A_MOUSE 60S ribosomal protein L27a OS=Mus musculus OX=10090 GN=Rpl27a PE=1 SV=5	sp|P14115|RL27A_MOUSE 60S ribosomal protein L27a OS=Mus musculus OX=10090 GN=Rpl27a PE=1 SV=5	200860100	638951100	677396500	706131400	248834300	587203100	905905200	984893200	803785000	127223600	652184000	889188200	609784400	683983800	260806200	604345500	989336800	649395900	814415000	133860000	558409800	714534100	703239300	846391500	120548100	383386000	457079000	559880700	793114400	102556600	455086000	559910200	1091733000	140127500	509504000	486986800	500011900	519512700
P14131	RS16_MOUSE 40S ribosomal protein S16 OS=Mus musculus OX=10090 GN=Rps16 PE=1 SV=4	Rps16	sp|P14131|RS16_MOUSE 40S ribosomal protein S16 OS=Mus musculus OX=10090 GN=Rps16 PE=1 SV=4	sp|P14131|RS16_MOUSE 40S ribosomal protein S16 OS=Mus musculus OX=10090 GN=Rps16 PE=1 SV=4	80567760	72719510	86968040	90101980	60948920	58263440	108354100	84654210	122710700	71346640	115596200	91765990	82212070	57858510	48760470	82176240	118539200	65855430	119051800	20467500	50441040	90123250	43496560	62080940	10218450	20167570	30658900	40660240	56741530	12216640	38528200	46909450	78806080	9999462	35808260	27492800	33273610	30701170
P14148	RL7_MOUSE 60S ribosomal protein L7 OS=Mus musculus OX=10090 GN=Rpl7 PE=1 SV=2	Rpl7	sp|P14148|RL7_MOUSE 60S ribosomal protein L7 OS=Mus musculus OX=10090 GN=Rpl7 PE=1 SV=2	sp|P14148|RL7_MOUSE 60S ribosomal protein L7 OS=Mus musculus OX=10090 GN=Rpl7 PE=1 SV=2	271329800	986442900	1433727000	1451416000	331919200	860204600	1334383000	1619874000	1474782000	174049600	1007921000	1459771000	1028529000	1404340000	403953900	941271300	1544275000	1284805000	1299979000	271084400	1263127000	2233317000	1980613000	1812193000	322124800	1110879000	2561683000	2094660000	1958474000	305789900	886137600	1805801000	2701710000	742921700	1235964000	2155436000	1459835000	1732017000
P14152	MDHC_MOUSE Malate dehydrogenase, cytoplasmic OS=Mus musculus OX=10090 GN=Mdh1 PE=1 SV=3	Mdh1	sp|P14152|MDHC_MOUSE Malate dehydrogenase, cytoplasmic OS=Mus musculus OX=10090 GN=Mdh1 PE=1 SV=3	sp|P14152|MDHC_MOUSE Malate dehydrogenase, cytoplasmic OS=Mus musculus OX=10090 GN=Mdh1 PE=1 SV=3	1107955000	1010454000	1210043000	984756900	962653400	1041976000	1136216000	1228307000	1111096000	1226253000	1420493000	1649919000	1249099000	643482200	995136900	1223174000	1157689000	981801000	1174874000	637899600	911380300	820593900	832270000	784070000	554723700	690109100	524454100	805072800	731881800	487795900	749234200	776651800	1128317000	368465400	737028200	469998300	775525300	483152200
P14206	RSSA_MOUSE 40S ribosomal protein SA OS=Mus musculus OX=10090 GN=Rpsa PE=1 SV=4	Rpsa	sp|P14206|RSSA_MOUSE 40S ribosomal protein SA OS=Mus musculus OX=10090 GN=Rpsa PE=1 SV=4	sp|P14206|RSSA_MOUSE 40S ribosomal protein SA OS=Mus musculus OX=10090 GN=Rpsa PE=1 SV=4	108288200	117555000	123354500	113179800	88093020	79237460	165362900	126250300	194228100	127526500	184629500	184145700	103935400	70487810	69162920	124040900	172377600	104120300	164836100	30426770	85587670	220891600	84396390	90394090	21720970	34713560	75432120	99614050	92533510	30400420	79347240	118039700	129810200	32551990	55811800	92351120	67707830	38516100
P14211	CALR_MOUSE Calreticulin OS=Mus musculus OX=10090 GN=Calr PE=1 SV=1	Calr	sp|P14211|CALR_MOUSE Calreticulin OS=Mus musculus OX=10090 GN=Calr PE=1 SV=1	sp|P14211|CALR_MOUSE Calreticulin OS=Mus musculus OX=10090 GN=Calr PE=1 SV=1	1016253000	1939046000	3290215000	2509921000	1049229000	1812862000	2773788000	2948244000	2651860000	1138684000	2091108000	2701953000	2581289000	2232989000	1451416000	2057520000	2981657000	2489464000	2676272000	801340700	1877119000	3611255000	2748673000	2544941000	591866100	1490419000	3193898000	3214903000	2557569000	817961900	1543173000	2650405000	3445282000	1557711000	2205668000	2695434000	2072252000	2458843000
P14234	FGR_MOUSE Tyrosine-protein kinase Fgr OS=Mus musculus OX=10090 GN=Fgr PE=1 SV=2	Fgr	sp|P14234|FGR_MOUSE Tyrosine-protein kinase Fgr OS=Mus musculus OX=10090 GN=Fgr PE=1 SV=2	sp|P14234|FGR_MOUSE Tyrosine-protein kinase Fgr OS=Mus musculus OX=10090 GN=Fgr PE=1 SV=2	903778	932783	4315672	2765781	1058438	1058237	3820095	2934100	1839274	1035676	471099	4229866	2011644	3326109	1385405	2115120	4545726	2675041	2389838	1281847	2174223	2404506	3852135	2587037	526713	1840895	7248117	4720592	2697172	1822291	1163053	2977362	3816330	1110055	2329956	2824134	6087602	5835115
P14246	GTR2_MOUSE Solute carrier family 2, facilitated glucose transporter member 2 OS=Mus musculus OX=10090 GN=Slc2a2 PE=1 SV=3	Slc2a2	sp|P14246|GTR2_MOUSE Solute carrier family 2, facilitated glucose transporter member 2 OS=Mus musculus OX=10090 GN=Slc2a2 PE=1 SV=3	sp|P14246|GTR2_MOUSE Solute carrier family 2, facilitated glucose transporter member 2 OS=Mus musculus OX=10090 GN=Slc2a2 PE=1 SV=3	352185900	475172500	328824300	298118600	293180700	327256900	322666400	401873000	343374100	356772200	559216000	633250700	333306200	400070600	329773800	405313400	385640500	384943300	442226900	342072900	721115100	613719000	499887800	585679700	342766200	348368500	450791300	485606000	548889300	349171200	526249100	552358300	1073898000	396450000	458818700	384076200	433588100	236749200
P14429	HA17_MOUSE H-2 class I histocompatibility antigen, Q7 alpha chain OS=Mus musculus OX=10090 GN=H2-Q7 PE=1 SV=1	H2-Q7	sp|P14429|HA17_MOUSE H-2 class I histocompatibility antigen, Q7 alpha chain OS=Mus musculus OX=10090 GN=H2-Q7 PE=1 SV=1	sp|P14429|HA17_MOUSE H-2 class I histocompatibility antigen, Q7 alpha chain OS=Mus musculus OX=10090 GN=H2-Q7 PE=1 SV=1	47263950	55673790	239196400	190655600	62875920	82662550	86822060	91327550	81109270	55439800	90716330	125451700	207333000	145429300	48691190	65083490	152808600	62282140	96371840	29695240	61563570	149189200	94823160	69197780	34775210	48376470	298630300	235709200	83367390	41429080	59575650	168252900	118622000	50455830	64266600	152994300	89427450	242500800
P14576	SRP54_MOUSE Signal recognition particle 54 kDa protein OS=Mus musculus OX=10090 GN=Srp54 PE=1 SV=2	Srp54	sp|P14576|SRP54_MOUSE Signal recognition particle 54 kDa protein OS=Mus musculus OX=10090 GN=Srp54 PE=1 SV=2	sp|P14576|SRP54_MOUSE Signal recognition particle 54 kDa protein OS=Mus musculus OX=10090 GN=Srp54 PE=1 SV=2	80087.8	215463	421008	66917.2	29151.7	272771	339244	467391	371836	127092	308160	109118	191338	42557.2	248804	149557	418638	86399.8	735425	199313	52364.4	181001	77285.5	103338	38303.4	103990	439901	303399	72483.6	92485.9	59552.8	29837.7	216921	23246	126350	43382.9	104854	77840.8
P14602	HSPB1_MOUSE Heat shock protein beta-1 OS=Mus musculus OX=10090 GN=Hspb1 PE=1 SV=3	Hspb1	sp|P14602|HSPB1_MOUSE Heat shock protein beta-1 OS=Mus musculus OX=10090 GN=Hspb1 PE=1 SV=3	sp|P14602|HSPB1_MOUSE Heat shock protein beta-1 OS=Mus musculus OX=10090 GN=Hspb1 PE=1 SV=3	72874810	44890450	232790000	177104300	68307570	70095830	27994610	278732500	381047700	87950280	150374600	80369940	238431800	13999300	11279840	15866070	241567500	137862800	5693167	56363630	75029860	12667970	18155510	393093400	66827980	79188930	211880900	116884900	94584000	122067000	137631400	194748200	26777240	127445300	166272500	189190500	126346600	218042000
P14685	PSMD3_MOUSE 26S proteasome non-ATPase regulatory subunit 3 OS=Mus musculus OX=10090 GN=Psmd3 PE=1 SV=3	Psmd3	sp|P14685|PSMD3_MOUSE 26S proteasome non-ATPase regulatory subunit 3 OS=Mus musculus OX=10090 GN=Psmd3 PE=1 SV=3	sp|P14685|PSMD3_MOUSE 26S proteasome non-ATPase regulatory subunit 3 OS=Mus musculus OX=10090 GN=Psmd3 PE=1 SV=3	22574300	26129630	49378430	31320600	21797230	20741910	32244540	44253140	43956200	25996650	35113730	36250200	28667880	26027390	17562020	30855400	32958410	27201670	40343490	7785096	18345730	47908940	38814330	38528410	9748127	12750490	30707410	42017180	39099580	9291478	22408720	38712610	53525460	13799370	25627360	34028720	29930780	19845100
P14733	LMNB1_MOUSE Lamin-B1 OS=Mus musculus OX=10090 GN=Lmnb1 PE=1 SV=3	Lmnb1	sp|P14733|LMNB1_MOUSE Lamin-B1 OS=Mus musculus OX=10090 GN=Lmnb1 PE=1 SV=3	sp|P14733|LMNB1_MOUSE Lamin-B1 OS=Mus musculus OX=10090 GN=Lmnb1 PE=1 SV=3	1913817	942720	5386221	1032849	978146	1589776	1378628	1141937	1069363	2638109	2129137	2114314	1968384	803546	1803315	904926	2125519	1262521	1057124	1396187	899675	2603362	1263581	1066263	902343	1173479	4558831	1777850	841683	708236	1303305	1546088	1508752	1270012	1839317	847237	1186473	914470
P14824	ANXA6_MOUSE Annexin A6 OS=Mus musculus OX=10090 GN=Anxa6 PE=1 SV=3	Anxa6	sp|P14824|ANXA6_MOUSE Annexin A6 OS=Mus musculus OX=10090 GN=Anxa6 PE=1 SV=3	sp|P14824|ANXA6_MOUSE Annexin A6 OS=Mus musculus OX=10090 GN=Anxa6 PE=1 SV=3	753491000	841414000	1230334000	1123819000	621567800	677207600	1037218000	1105841000	1022123000	870765800	796440900	1948834000	1243821000	783271500	524577300	707253400	1536741000	981898000	1148203000	664421900	833850500	2102633000	1279495000	1016905000	1083586000	783794500	1625129000	1467278000	1644099000	701011400	789234900	1665199000	1602633000	730934100	991979900	1316292000	1461968000	1020874000
P14847	CRP_MOUSE C-reactive protein OS=Mus musculus OX=10090 GN=Crp PE=1 SV=2	Crp	sp|P14847|CRP_MOUSE C-reactive protein OS=Mus musculus OX=10090 GN=Crp PE=1 SV=2	sp|P14847|CRP_MOUSE C-reactive protein OS=Mus musculus OX=10090 GN=Crp PE=1 SV=2	4383148	4863530	5562216	7344263	3730601	6206281	7328652	10113100	8507042	3000854	6543228	8726187	8382273	6706393	6095200	7639480	7312705	10527580	13855910	2930913	6629798	9266263	11220830	7609109	3966969	10272210	18969700	10339660	12097480	2520020	4907241	9100184	15676640	10175820	12489040	12883790	12895650	10323130
P14869	RLA0_MOUSE 60S acidic ribosomal protein P0 OS=Mus musculus OX=10090 GN=Rplp0 PE=1 SV=3	Rplp0	sp|P14869|RLA0_MOUSE 60S acidic ribosomal protein P0 OS=Mus musculus OX=10090 GN=Rplp0 PE=1 SV=3	sp|P14869|RLA0_MOUSE 60S acidic ribosomal protein P0 OS=Mus musculus OX=10090 GN=Rplp0 PE=1 SV=3	224918400	587556500	820390300	783145900	228126300	532872800	790699000	921431900	876188200	160515400	654472300	910270200	664759100	668957400	253246000	599214300	851781800	685853300	777411100	137895800	721932600	1245803000	888103200	925617600	109298000	497028800	1088095000	973332500	956072200	137747200	481891300	902959900	1286493000	255024500	628882700	928875500	730817000	758447900
P14901	HMOX1_MOUSE Heme oxygenase 1 OS=Mus musculus OX=10090 GN=Hmox1 PE=1 SV=1	Hmox1	sp|P14901|HMOX1_MOUSE Heme oxygenase 1 OS=Mus musculus OX=10090 GN=Hmox1 PE=1 SV=1	sp|P14901|HMOX1_MOUSE Heme oxygenase 1 OS=Mus musculus OX=10090 GN=Hmox1 PE=1 SV=1	6236083	12662540	48637010	37534440	14830280	30074140	34482720	30296630	18909560	11792860	15162470	21179060	34296910	17377050	15201260	11672230	33347380	12717620	31115940	5645871	7770015	10938820	10417610	8366945	5602060	8154117	15380100	20905270	7320714	5709994	8074195	14571560	12300840	5019839	8975708	8501141	11128540	9684385
P15105	GLNA_MOUSE Glutamine synthetase OS=Mus musculus OX=10090 GN=Glul PE=1 SV=6	Glul	sp|P15105|GLNA_MOUSE Glutamine synthetase OS=Mus musculus OX=10090 GN=Glul PE=1 SV=6	sp|P15105|GLNA_MOUSE Glutamine synthetase OS=Mus musculus OX=10090 GN=Glul PE=1 SV=6	288822100	689015800	1081136000	1521610000	268427100	420391900	1660561000	1408621000	1626779000	336704100	812883800	1464349000	991603100	1485188000	286141700	621608700	1995592000	908501000	1310823000	169304800	652711300	1317125000	1542868000	1543824000	182708500	366714600	1592991000	1793933000	1862040000	126053100	688680000	1165876000	2964533000	112005200	354015800	1413414000	1206038000	1368443000
P15116	CADH2_MOUSE Cadherin-2 OS=Mus musculus OX=10090 GN=Cdh2 PE=1 SV=2	Cdh2	sp|P15116|CADH2_MOUSE Cadherin-2 OS=Mus musculus OX=10090 GN=Cdh2 PE=1 SV=2	sp|P15116|CADH2_MOUSE Cadherin-2 OS=Mus musculus OX=10090 GN=Cdh2 PE=1 SV=2	17080030	10303160	9372360	8747684	15215530	11956090	10629950	7301545	8510125	22955520	11192360	14268350	10529690	5862111	14523780	11354960	9910317	10981200	13519450	14585550	8523095	11746460	9734864	8295668	5532912	5812141	9692449	8098344	12870020	9426934	13352110	11686090	13378170	10996330	11147970	6419255	9983391	5065600
P15208	INSR_MOUSE Insulin receptor OS=Mus musculus OX=10090 GN=Insr PE=1 SV=2	Insr	sp|P15208|INSR_MOUSE Insulin receptor OS=Mus musculus OX=10090 GN=Insr PE=1 SV=2	sp|P15208|INSR_MOUSE Insulin receptor OS=Mus musculus OX=10090 GN=Insr PE=1 SV=2	12818130	14743240	12618090	12249770	11606560	13793610	14151800	11557090	11721750	16091390	16854970	27063380	11568680	21222920	11389380	17466550	17160120	13028810	16689380	16183350	18577600	32523410	21984660	23252000	11341050	14253820	21017930	26457060	28291310	7974428	15677200	22216050	49654990	11779970	19040290	16508500	24045690	15122620
P15379	CD44_MOUSE CD44 antigen OS=Mus musculus OX=10090 GN=Cd44 PE=1 SV=3	Cd44	sp|P15379|CD44_MOUSE CD44 antigen OS=Mus musculus OX=10090 GN=Cd44 PE=1 SV=3	sp|P15379|CD44_MOUSE CD44 antigen OS=Mus musculus OX=10090 GN=Cd44 PE=1 SV=3	6438285	6416951	41741660	20854740	4495497	7653467	16640180	21572210	10217110	8631944	9756093	13664200	40537700	18934840	7458927	4728658	16118800	13939430	17567980	8726905	10422170	17954220	22031170	13555840	4218655	7533040	35207810	46793560	16792590	6366660	11510140	17741800	15266290	8763662	10369030	17446360	33548450	39767370
P15392	CP2A4_MOUSE Cytochrome P450 2A4 OS=Mus musculus OX=10090 GN=Cyp2a4 PE=2 SV=3	Cyp2a4	sp|P15392|CP2A4_MOUSE Cytochrome P450 2A4 OS=Mus musculus OX=10090 GN=Cyp2a4 PE=2 SV=3	sp|P15392|CP2A4_MOUSE Cytochrome P450 2A4 OS=Mus musculus OX=10090 GN=Cyp2a4 PE=2 SV=3	143330200	302628800	467823600	330925800	136186000	280391200	464933500	476959100	512233400	181454200	260413600	413405200	339494900	413201000	184161400	292827500	514750200	374424500	385946300	81425760	312240800	569844500	436577500	436157800	112236100	197860000	907510000	604948300	607464200	158576300	298527400	679512100	679567300	259968500	408448600	701251500	320954900	579140600
P15508	SPTB1_MOUSE Spectrin beta chain, erythrocytic OS=Mus musculus OX=10090 GN=Sptb PE=1 SV=4	Sptb	sp|P15508|SPTB1_MOUSE Spectrin beta chain, erythrocytic OS=Mus musculus OX=10090 GN=Sptb PE=1 SV=4	sp|P15508|SPTB1_MOUSE Spectrin beta chain, erythrocytic OS=Mus musculus OX=10090 GN=Sptb PE=1 SV=4	34957280	121326800	90882720	28713590	38590940	37304000	113041700	71769250	39235480	29325570	100138400	136717200	64077070	65955940	31786940	174161600	123223500	62787410	51409160	41231820	210412500	151176900	101228600	56071180	19088900	40356340	74011620	92461920	50787030	28610550	144954000	80457440	135833300	44061100	64605910	94221430	89484120	66369140
P15535	B4GT1_MOUSE Beta-1,4-galactosyltransferase 1 OS=Mus musculus OX=10090 GN=B4galt1 PE=1 SV=1	B4galt1	sp|P15535|B4GT1_MOUSE Beta-1,4-galactosyltransferase 1 OS=Mus musculus OX=10090 GN=B4galt1 PE=1 SV=1	sp|P15535|B4GT1_MOUSE Beta-1,4-galactosyltransferase 1 OS=Mus musculus OX=10090 GN=B4galt1 PE=1 SV=1	8020862	20547340	39295400	29640870	6146145	10105640	28797850	35432030	12417860	4910539	20157610	21331850	28716550	37507870	13615530	22465950	26741630	20340740	24622180	8733328	24344040	46813190	28386890	35612220	6969837	18382390	49830200	58234340	35750000	10822150	15515760	37924540	48730820	12495540	25821140	51102900	27601660	32171200
P15626	GSTM2_MOUSE Glutathione S-transferase Mu 2 OS=Mus musculus OX=10090 GN=Gstm2 PE=1 SV=2	Gstm2	sp|P15626|GSTM2_MOUSE Glutathione S-transferase Mu 2 OS=Mus musculus OX=10090 GN=Gstm2 PE=1 SV=2	sp|P15626|GSTM2_MOUSE Glutathione S-transferase Mu 2 OS=Mus musculus OX=10090 GN=Gstm2 PE=1 SV=2	24224960	18456850	26773010	31993350	18801660	22195230	27536970	34365850	32508270	24005460	29019080	35860080	25633550	13684760	16834310	24165720	35688270	17681630	37256640	8210473	13318740	32786390	15088320	21312730	15059520	15223020	25691620	24283380	19256440	13305350	15811590	34920490	33389000	7209567	12645340	16533010	20961790	9805298
P16015	CAH3_MOUSE Carbonic anhydrase 3 OS=Mus musculus OX=10090 GN=Ca3 PE=1 SV=3	Ca3	sp|P16015|CAH3_MOUSE Carbonic anhydrase 3 OS=Mus musculus OX=10090 GN=Ca3 PE=1 SV=3	sp|P16015|CAH3_MOUSE Carbonic anhydrase 3 OS=Mus musculus OX=10090 GN=Ca3 PE=1 SV=3	1832180000	1873528000	1983150000	1253765000	1783445000	1601078000	1351860000	1932534000	2480514000	2801463000	2008707000	1320658000	1818224000	682156800	1672730000	2170602000	1555608000	1193327000	2485804000	426270600	794709600	1227662000	994826700	872335100	510935900	429902900	569980900	754118300	966644300	543975700	673445400	934483200	1662126000	364663700	632901700	557019700	856109800	428063200
P16045	LEG1_MOUSE Galectin-1 OS=Mus musculus OX=10090 GN=Lgals1 PE=1 SV=3	Lgals1	sp|P16045|LEG1_MOUSE Galectin-1 OS=Mus musculus OX=10090 GN=Lgals1 PE=1 SV=3	sp|P16045|LEG1_MOUSE Galectin-1 OS=Mus musculus OX=10090 GN=Lgals1 PE=1 SV=3	2827190	2562412	2367258	3564445	3293215	2248051	2118534	1258487	3445793	3871457	3213840	1834978	4615730	1008036	1666238	2707423	2407998	487330	3393242	1008085	950649	997245	544332	483848	474353	512948	1240390	1113054	546606	649390	841438	1900410	1554806	332024	1228249	408983	691452	826305
P16056	MET_MOUSE Hepatocyte growth factor receptor OS=Mus musculus OX=10090 GN=Met PE=1 SV=1	Met	sp|P16056|MET_MOUSE Hepatocyte growth factor receptor OS=Mus musculus OX=10090 GN=Met PE=1 SV=1	sp|P16056|MET_MOUSE Hepatocyte growth factor receptor OS=Mus musculus OX=10090 GN=Met PE=1 SV=1	2152154	1704481	1595322	1421485	2099175	1439412	1459173	1881310	2130236	2445376	1435526	1615668	1114581	737035	1596589	2054754	753651	1776759	2896344	874528	1156370	1316116	723595	1725514	1403955	1207191	690978	1548793	1735752	874604	1424826	834325	1252286	1174020	1488303	394446	1412622	1216827
P16110	LEG3_MOUSE Galectin-3 OS=Mus musculus OX=10090 GN=Lgals3 PE=1 SV=3	Lgals3	sp|P16110|LEG3_MOUSE Galectin-3 OS=Mus musculus OX=10090 GN=Lgals3 PE=1 SV=3	sp|P16110|LEG3_MOUSE Galectin-3 OS=Mus musculus OX=10090 GN=Lgals3 PE=1 SV=3	1597490	360397	3160400	1931823	108058	227470	201086	390250	243116	274665	402728	553595	2335509	1067870	188944	102447	663836	39791.9	198272	800390	533953	371423	76576.4	74079.8	298693	121736	133604	914216	99945.7	98279	292537	692606	871794	0	187463	176924	90591.4	1126043
P16125	LDHB_MOUSE L-lactate dehydrogenase B chain OS=Mus musculus OX=10090 GN=Ldhb PE=1 SV=2	Ldhb	sp|P16125|LDHB_MOUSE L-lactate dehydrogenase B chain OS=Mus musculus OX=10090 GN=Ldhb PE=1 SV=2	sp|P16125|LDHB_MOUSE L-lactate dehydrogenase B chain OS=Mus musculus OX=10090 GN=Ldhb PE=1 SV=2	32802530	27162480	45114480	38863760	31264490	25997800	39698360	38092470	43003320	40713310	43569550	71285330	49701630	41154200	34748460	40984970	53950810	36489960	44823810	59598020	33014980	45587410	42501260	40101960	35268050	33918530	32813760	47396410	53633770	24508570	36689420	55072870	64627050	33333360	36682050	30473740	39412630	38440610
P16294	FA9_MOUSE Coagulation factor IX OS=Mus musculus OX=10090 GN=F9 PE=2 SV=3	F9	sp|P16294|FA9_MOUSE Coagulation factor IX OS=Mus musculus OX=10090 GN=F9 PE=2 SV=3	sp|P16294|FA9_MOUSE Coagulation factor IX OS=Mus musculus OX=10090 GN=F9 PE=2 SV=3	1878616	3734457	2396548	2171482	2131666	2876587	2981680	3796087	3460709	2212141	5169108	2927327	1877327	2618719	2217391	4202572	2491917	3035580	4970905	1368598	3709826	4350458	4368446	2452378	586785	2102575	1925775	2383062	3695269	631780	2436503	2448305	6441049	1518571	2101950	1434001	2467904	1239519
P16301	LCAT_MOUSE Phosphatidylcholine-sterol acyltransferase OS=Mus musculus OX=10090 GN=Lcat PE=1 SV=2	Lcat	sp|P16301|LCAT_MOUSE Phosphatidylcholine-sterol acyltransferase OS=Mus musculus OX=10090 GN=Lcat PE=1 SV=2	sp|P16301|LCAT_MOUSE Phosphatidylcholine-sterol acyltransferase OS=Mus musculus OX=10090 GN=Lcat PE=1 SV=2	44448260	34846880	29977160	18684280	102403100	70038900	42616300	71721120	30751740	66714050	50671070	36736340	44919930	12362700	46322450	61855320	29460570	40133680	28693570	20285560	18681100	44394130	12962080	13618570	9660109	4300474	14373650	16980030	15805780	6588711	7548523	17530930	21968010	13698870	14316680	13613310	11793100	13191220
P16330	CN37_MOUSE 2',3'-cyclic-nucleotide 3'-phosphodiesterase OS=Mus musculus OX=10090 GN=Cnp PE=1 SV=3	Cnp	sp|P16330|CN37_MOUSE 2',3'-cyclic-nucleotide 3'-phosphodiesterase OS=Mus musculus OX=10090 GN=Cnp PE=1 SV=3	sp|P16330|CN37_MOUSE 2',3'-cyclic-nucleotide 3'-phosphodiesterase OS=Mus musculus OX=10090 GN=Cnp PE=1 SV=3	3516774	1456673	3347199	3553098	5375114	4055021	4120688	6215289	4586178	7015727	4420968	7914538	2420611	2036170	3145072	7392066	2154767	5460288	5227513	1413357	1819123	3370932	2754586	2732179	2374242	1583859	3394461	3048901	2049671	2638240	2393580	1546407	4483848	1650377	1880862	2025109	2758614	3015764
P16331	PH4H_MOUSE Phenylalanine-4-hydroxylase OS=Mus musculus OX=10090 GN=Pah PE=1 SV=4	Pah	sp|P16331|PH4H_MOUSE Phenylalanine-4-hydroxylase OS=Mus musculus OX=10090 GN=Pah PE=1 SV=4	sp|P16331|PH4H_MOUSE Phenylalanine-4-hydroxylase OS=Mus musculus OX=10090 GN=Pah PE=1 SV=4	827266500	534689600	534771800	302213800	734912700	592148200	527476700	621701600	659852000	1172531000	738144100	488492600	564764400	208098400	787958700	686799800	588711100	445059900	937428500	116191700	175552800	587029000	401790900	260135900	221144900	150631400	283544700	349236300	378969900	216144200	250034400	421073800	461978100	132029300	216950200	235026900	272136500	119337900
P16332	MUTA_MOUSE Methylmalonyl-CoA mutase, mitochondrial OS=Mus musculus OX=10090 GN=Mmut PE=1 SV=2	Mmut	sp|P16332|MUTA_MOUSE Methylmalonyl-CoA mutase, mitochondrial OS=Mus musculus OX=10090 GN=Mmut PE=1 SV=2	sp|P16332|MUTA_MOUSE Methylmalonyl-CoA mutase, mitochondrial OS=Mus musculus OX=10090 GN=Mmut PE=1 SV=2	487181400	319402500	263218700	157259200	576162200	306453300	203985800	315787100	148321000	531730800	338177900	372873800	210738500	105920600	405674900	230438200	252965300	174270300	129969700	504078800	291739600	322647300	203599100	109990000	442365800	418268500	309403500	232499800	122124700	352718400	348028300	241104300	234494400	458602100	317400700	223434700	275252100	118587100
P16406	AMPE_MOUSE Glutamyl aminopeptidase OS=Mus musculus OX=10090 GN=Enpep PE=1 SV=1	Enpep	sp|P16406|AMPE_MOUSE Glutamyl aminopeptidase OS=Mus musculus OX=10090 GN=Enpep PE=1 SV=1	sp|P16406|AMPE_MOUSE Glutamyl aminopeptidase OS=Mus musculus OX=10090 GN=Enpep PE=1 SV=1	128942000	113015200	141970400	430205100	100304200	266359100	114122000	154989700	129065800	114642100	159389700	235771300	117308400	227357600	127984300	122307400	193791800	249788500	169430100	409120000	327523600	299274300	345234000	253267100	306421000	348497100	878475000	360421200	683731500	160093400	233624200	297886900	550021100	331577500	391776700	737486300	322306700	352711400
P16460	ASSY_MOUSE Argininosuccinate synthase OS=Mus musculus OX=10090 GN=Ass1 PE=1 SV=1	Ass1	sp|P16460|ASSY_MOUSE Argininosuccinate synthase OS=Mus musculus OX=10090 GN=Ass1 PE=1 SV=1	sp|P16460|ASSY_MOUSE Argininosuccinate synthase OS=Mus musculus OX=10090 GN=Ass1 PE=1 SV=1	16777180000	17641800000	16674560000	9989268000	14616220000	18171100000	11911090000	21860820000	18851210000	19898110000	22492680000	13630680000	15270930000	6163946000	14672530000	15115200000	11377440000	15629560000	23010750000	4699023000	10190640000	14197230000	8958479000	10219040000	2790767000	5879398000	5343715000	6021915000	6910735000	4568462000	7968905000	6534714000	14890350000	3782457000	6231887000	4428984000	6994307000	3627628000
P16546	SPTN1_MOUSE Spectrin alpha chain, non-erythrocytic 1 OS=Mus musculus OX=10090 GN=Sptan1 PE=1 SV=4	Sptan1	sp|P16546|SPTN1_MOUSE Spectrin alpha chain, non-erythrocytic 1 OS=Mus musculus OX=10090 GN=Sptan1 PE=1 SV=4	sp|P16546|SPTN1_MOUSE Spectrin alpha chain, non-erythrocytic 1 OS=Mus musculus OX=10090 GN=Sptan1 PE=1 SV=4	492202100	224117300	311967400	210594100	208396100	262518500	250391500	220716100	207579000	423527500	281461500	443529100	262748600	156538100	224832500	191377100	293415200	225264400	214048900	767232200	156627200	302203200	213090800	222031500	122231200	189109100	285520300	194175600	226949100	172246300	335028400	290019500	266945200	174779200	317019000	183523600	229786400	168820700
P16675	PPGB_MOUSE Lysosomal protective protein OS=Mus musculus OX=10090 GN=Ctsa PE=1 SV=1	Ctsa	sp|P16675|PPGB_MOUSE Lysosomal protective protein OS=Mus musculus OX=10090 GN=Ctsa PE=1 SV=1	sp|P16675|PPGB_MOUSE Lysosomal protective protein OS=Mus musculus OX=10090 GN=Ctsa PE=1 SV=1	28059760	36272260	86618020	83906790	39605670	45254530	59629370	62969320	34899910	35755610	40721580	102886800	61973470	118362600	39981980	38688940	92287260	46143920	47194670	62513840	159796200	127691800	196956700	98592320	76201290	175370100	284181700	204721300	171462100	54191190	77115500	115020100	191277100	80555380	180475100	193971000	248339700	245252900
P16858	G3P_MOUSE Glyceraldehyde-3-phosphate dehydrogenase OS=Mus musculus OX=10090 GN=Gapdh PE=1 SV=2	Gapdh	sp|P16858|G3P_MOUSE Glyceraldehyde-3-phosphate dehydrogenase OS=Mus musculus OX=10090 GN=Gapdh PE=1 SV=2	sp|P16858|G3P_MOUSE Glyceraldehyde-3-phosphate dehydrogenase OS=Mus musculus OX=10090 GN=Gapdh PE=1 SV=2	2087772000	1646198000	1264634000	969267200	2172973000	1389686000	1575617000	1269799000	1605599000	2201995000	2456604000	2012212000	1450476000	564036900	1868015000	2120834000	1917178000	1033335000	1755011000	462864500	988570200	966599700	556948800	590604200	275200100	369334600	311285800	492514500	501085800	552844900	932091600	747994700	910976100	332272900	638492400	280216400	537099600	296240500
P16882	GHR_MOUSE Growth hormone receptor OS=Mus musculus OX=10090 GN=Ghr PE=1 SV=1	Ghr	sp|P16882|GHR_MOUSE Growth hormone receptor OS=Mus musculus OX=10090 GN=Ghr PE=1 SV=1	sp|P16882|GHR_MOUSE Growth hormone receptor OS=Mus musculus OX=10090 GN=Ghr PE=1 SV=1	820287	908446	799940	429582	1626609	1634409	1173529	1522130	973649	1037078	1138993	149519	943832	197305	755564	2729903	492781	1395656	1448455	226879	334163	461577	431649	483151	48868.5	45943.7	57171.8	43082	57246.6	19380.2	167116	294536	464290	34656.9	56519.9	211257	144387	69301.5
P17047	LAMP2_MOUSE Lysosome-associated membrane glycoprotein 2 OS=Mus musculus OX=10090 GN=Lamp2 PE=1 SV=2	Lamp2	sp|P17047|LAMP2_MOUSE Lysosome-associated membrane glycoprotein 2 OS=Mus musculus OX=10090 GN=Lamp2 PE=1 SV=2	sp|P17047|LAMP2_MOUSE Lysosome-associated membrane glycoprotein 2 OS=Mus musculus OX=10090 GN=Lamp2 PE=1 SV=2	278007500	280407800	511307400	678720200	428468500	480692800	527036700	634716600	248930000	394188600	311276200	679133200	422127300	665122600	631771500	395768000	694867100	428038700	332043100	763403800	1133674000	1037079000	1227285000	727548900	1355582000	1270909000	1886690000	1362584000	1425483000	706706900	719176300	1019387000	1404266000	1473452000	1485012000	1443441000	1353453000	1455862000
P17182	ENOA_MOUSE Alpha-enolase OS=Mus musculus OX=10090 GN=Eno1 PE=1 SV=3	Eno1	sp|P17182|ENOA_MOUSE Alpha-enolase OS=Mus musculus OX=10090 GN=Eno1 PE=1 SV=3	sp|P17182|ENOA_MOUSE Alpha-enolase OS=Mus musculus OX=10090 GN=Eno1 PE=1 SV=3	498952400	414628900	359108200	226850400	552250400	365431600	452303400	404435900	524820500	748911800	611898300	530622700	392115800	142416000	400568100	524845800	411834100	325653200	586151800	179388900	214005200	277830500	220609000	187876100	135350600	125334400	127983200	189735100	169150500	195622600	246284200	220013400	331648900	98384480	166306800	110216300	164581200	91322640
P17225	PTBP1_MOUSE Polypyrimidine tract-binding protein 1 OS=Mus musculus OX=10090 GN=Ptbp1 PE=1 SV=2	Ptbp1	sp|P17225|PTBP1_MOUSE Polypyrimidine tract-binding protein 1 OS=Mus musculus OX=10090 GN=Ptbp1 PE=1 SV=2	sp|P17225|PTBP1_MOUSE Polypyrimidine tract-binding protein 1 OS=Mus musculus OX=10090 GN=Ptbp1 PE=1 SV=2	1336490	1019690	2406814	1240876	1192347	1244181	3083647	1894530	1051922	786228	3354281	3449760	1852796	1836026	1270466	1129188	4133253	534034	635281	1266898	3335767	1975024	2992375	1064346	1421281	2263846	7594995	6084835	3741857	593227	1046411	1449622	6015412	1187239	1963439	3588985	3865540	2130653
P17426	AP2A1_MOUSE AP-2 complex subunit alpha-1 OS=Mus musculus OX=10090 GN=Ap2a1 PE=1 SV=1	Ap2a1	sp|P17426|AP2A1_MOUSE AP-2 complex subunit alpha-1 OS=Mus musculus OX=10090 GN=Ap2a1 PE=1 SV=1	sp|P17426|AP2A1_MOUSE AP-2 complex subunit alpha-1 OS=Mus musculus OX=10090 GN=Ap2a1 PE=1 SV=1	36059420	31403760	39869720	35974950	27282550	26705480	41996010	27204450	49691530	35330170	33084220	59871650	47351890	25794620	26055460	37087510	32927160	38792690	44687400	30867770	39267020	46461050	38861070	40800710	16283100	29199150	38183250	35367390	37795470	19998780	26488450	40290240	54456370	21123580	37938410	40428090	33884020	29381980
P17427	AP2A2_MOUSE AP-2 complex subunit alpha-2 OS=Mus musculus OX=10090 GN=Ap2a2 PE=1 SV=2	Ap2a2	sp|P17427|AP2A2_MOUSE AP-2 complex subunit alpha-2 OS=Mus musculus OX=10090 GN=Ap2a2 PE=1 SV=2	sp|P17427|AP2A2_MOUSE AP-2 complex subunit alpha-2 OS=Mus musculus OX=10090 GN=Ap2a2 PE=1 SV=2	160098600	96453770	194357800	180045200	80465920	113142300	151360600	169485500	164201800	131384300	112929600	262981200	182570600	178927400	104102200	92706390	185227300	166783700	181235600	213044900	185520800	271009400	203868000	208577400	89048170	132806500	269059100	241935900	264233300	92010650	150181300	206478900	363653700	98851050	177338200	212863000	237133700	157899400
P17439	GLCM_MOUSE Lysosomal acid glucosylceramidase OS=Mus musculus OX=10090 GN=Gba PE=1 SV=1	Gba	sp|P17439|GLCM_MOUSE Lysosomal acid glucosylceramidase OS=Mus musculus OX=10090 GN=Gba PE=1 SV=1	sp|P17439|GLCM_MOUSE Lysosomal acid glucosylceramidase OS=Mus musculus OX=10090 GN=Gba PE=1 SV=1	45131920	44763120	75140820	82962060	55428960	55636270	52278630	53962010	31528300	55782950	47223080	121486200	52745700	123134800	75468740	48173470	91191080	45769820	28651390	101914300	176486600	131131300	206151300	124591800	239255200	218189500	283071200	259431900	261599500	99677720	136229900	152071500	265002100	232672000	270490400	215245600	229420400	234646300
P17563	SBP1_MOUSE Methanethiol oxidase OS=Mus musculus OX=10090 GN=Selenbp1 PE=1 SV=2	Selenbp1	sp|P17563|SBP1_MOUSE Methanethiol oxidase OS=Mus musculus OX=10090 GN=Selenbp1 PE=1 SV=2	sp|P17563|SBP1_MOUSE Methanethiol oxidase OS=Mus musculus OX=10090 GN=Selenbp1 PE=1 SV=2	53986540	95888750	108667700	105621700	86295370	95734850	116392200	145602200	126543400	69941920	102933800	179248700	110907000	80063270	87213790	122271500	162098400	83875200	146998700	46466050	92395850	163283400	132966800	108821200	91971160	58944780	96696170	102811400	144571900	50577910	90309970	126577900	179300700	46917640	97746850	92888870	107116100	66581970
P17710	HXK1_MOUSE Hexokinase-1 OS=Mus musculus OX=10090 GN=Hk1 PE=1 SV=3	Hk1	sp|P17710|HXK1_MOUSE Hexokinase-1 OS=Mus musculus OX=10090 GN=Hk1 PE=1 SV=3	sp|P17710|HXK1_MOUSE Hexokinase-1 OS=Mus musculus OX=10090 GN=Hk1 PE=1 SV=3	45567650	35842050	82433790	45273910	30497640	40546740	53972020	42323040	36243320	58896130	67283200	56653870	65791900	41695990	49296190	50724730	51728550	37658650	41315970	253408900	44280260	60156830	62484670	36205100	38300780	40746450	96338410	74491720	44257080	47387980	59452340	65704340	74026160	57810250	66881200	50647880	62472390	64194240
P17717	UDB17_MOUSE UDP-glucuronosyltransferase 2B17 OS=Mus musculus OX=10090 GN=Ugt2b17 PE=1 SV=1	Ugt2b17	sp|P17717|UDB17_MOUSE UDP-glucuronosyltransferase 2B17 OS=Mus musculus OX=10090 GN=Ugt2b17 PE=1 SV=1	sp|P17717|UDB17_MOUSE UDP-glucuronosyltransferase 2B17 OS=Mus musculus OX=10090 GN=Ugt2b17 PE=1 SV=1	1034423000	1667401000	2458687000	2280601000	980626700	1750150000	1863288000	2736322000	2349691000	1056625000	2030080000	2476748000	1677136000	1892645000	1450460000	1701310000	2178175000	2154774000	2084446000	714280000	2148674000	3916425000	3189210000	3021050000	980209000	2019503000	4837297000	2899087000	3372665000	966485100	1742802000	2718910000	3963429000	2087859000	2372504000	3159959000	2453078000	2874927000
P17742	PPIA_MOUSE Peptidyl-prolyl cis-trans isomerase A OS=Mus musculus OX=10090 GN=Ppia PE=1 SV=2	Ppia	sp|P17742|PPIA_MOUSE Peptidyl-prolyl cis-trans isomerase A OS=Mus musculus OX=10090 GN=Ppia PE=1 SV=2	sp|P17742|PPIA_MOUSE Peptidyl-prolyl cis-trans isomerase A OS=Mus musculus OX=10090 GN=Ppia PE=1 SV=2	413077600	353983200	254557900	157335600	456717800	392316400	425566400	374910700	370754200	553458300	551984800	311905700	354051600	80179300	308525600	413744800	337188700	242949600	496589200	96707000	98134620	70721610	77839160	76350610	38919400	61264720	86515460	88983570	79331820	41096720	134883600	89500340	111319600	44642970	104773900	47239000	72005330	60895940
P17751	TPIS_MOUSE Triosephosphate isomerase OS=Mus musculus OX=10090 GN=Tpi1 PE=1 SV=4	Tpi1	sp|P17751|TPIS_MOUSE Triosephosphate isomerase OS=Mus musculus OX=10090 GN=Tpi1 PE=1 SV=4	sp|P17751|TPIS_MOUSE Triosephosphate isomerase OS=Mus musculus OX=10090 GN=Tpi1 PE=1 SV=4	404098500	282194900	213246200	99762570	420063400	268256800	320973900	279116500	328266700	538973500	467394300	196026400	266649300	53181780	266120000	399005500	229212400	199123600	442945100	44050990	45391330	64865690	35050980	47248130	16621540	34280450	63960240	61867820	42181180	31561800	60067530	57529180	66741310	16597010	37135230	39663280	33730720	48799570
P17809	GTR1_MOUSE Solute carrier family 2, facilitated glucose transporter member 1 OS=Mus musculus OX=10090 GN=Slc2a1 PE=1 SV=4	Slc2a1	sp|P17809|GTR1_MOUSE Solute carrier family 2, facilitated glucose transporter member 1 OS=Mus musculus OX=10090 GN=Slc2a1 PE=1 SV=4	sp|P17809|GTR1_MOUSE Solute carrier family 2, facilitated glucose transporter member 1 OS=Mus musculus OX=10090 GN=Slc2a1 PE=1 SV=4	707966	416391	1117578	933191	1026798	659845	1032798	957696	277428	219770	1086526	333779	946838	1293616	927233	1037605	886039	921259	1435294	6928985	202602	1400923	287249	238382	538029	574411	1079486	1015933	519582	334710	214823	1206942	1223530	145318	372865	661534	507479	959964
P18052	PTPRA_MOUSE Receptor-type tyrosine-protein phosphatase alpha OS=Mus musculus OX=10090 GN=Ptpra PE=1 SV=3	Ptpra	sp|P18052|PTPRA_MOUSE Receptor-type tyrosine-protein phosphatase alpha OS=Mus musculus OX=10090 GN=Ptpra PE=1 SV=3	sp|P18052|PTPRA_MOUSE Receptor-type tyrosine-protein phosphatase alpha OS=Mus musculus OX=10090 GN=Ptpra PE=1 SV=3	164760	508844	411279	295545	175876	223501	389336	162369	446787	314117	391043	406686	222308	483949	456645	646718	451450	124350	433648	255150	307106	402889	892504	400629	231536	375146	713009	485521	160968	254943	260781	296919	428031	231632	538940	263773	396485	923506
P18242	CATD_MOUSE Cathepsin D OS=Mus musculus OX=10090 GN=Ctsd PE=1 SV=1	Ctsd	sp|P18242|CATD_MOUSE Cathepsin D OS=Mus musculus OX=10090 GN=Ctsd PE=1 SV=1	sp|P18242|CATD_MOUSE Cathepsin D OS=Mus musculus OX=10090 GN=Ctsd PE=1 SV=1	337534700	411721900	977082200	872532500	473389500	479945000	664365000	639167200	397348600	431842600	519040700	1079831000	649430100	1098531000	560318600	440875300	1060402000	419864200	457864600	1435375000	1770160000	1093324000	1972198000	1085692000	2735186000	2210493000	3256525000	2363415000	1982367000	1063805000	1074622000	1274338000	2192697000	2466225000	2321825000	2176454000	2310823000	2334391000
P18527	HVM56_MOUSE Ig heavy chain V region 914 OS=Mus musculus OX=10090 PE=1 SV=1	NoGeneName	sp|P18527|HVM56_MOUSE Ig heavy chain V region 914 OS=Mus musculus OX=10090 PE=1 SV=1	sp|P18527|HVM56_MOUSE Ig heavy chain V region 914 OS=Mus musculus OX=10090 PE=1 SV=1	118200	162496	1174374	4818389	258418	491569	577731	3400847	929104	12592.3	1539871	189940	473825	816602	282000	1765449	5698220	1131695	48728.5	228921	659774	990811	881352	1141208	226907	34264.8	2995718	2620298	982812	32656	358768	16721110	1235886	102927	928439	836577	14325640	1554586
P18572	BASI_MOUSE Basigin OS=Mus musculus OX=10090 GN=Bsg PE=1 SV=2	Bsg	sp|P18572|BASI_MOUSE Basigin OS=Mus musculus OX=10090 GN=Bsg PE=1 SV=2	sp|P18572|BASI_MOUSE Basigin OS=Mus musculus OX=10090 GN=Bsg PE=1 SV=2	217177000	358833900	288096800	231311800	187497700	223253300	248357200	275115500	210988000	274944000	341961700	588592200	243714800	333700900	220073300	304880000	363054500	271375600	262688600	317033600	409546100	469162000	354808100	360303300	189149000	239617000	382072400	350638700	430128600	186612900	317492000	386867800	681628300	220004700	287657500	245659300	374649900	281692100
P18581	CTR2_MOUSE Cationic amino acid transporter 2 OS=Mus musculus OX=10090 GN=Slc7a2 PE=1 SV=3	Slc7a2	sp|P18581|CTR2_MOUSE Cationic amino acid transporter 2 OS=Mus musculus OX=10090 GN=Slc7a2 PE=1 SV=3	sp|P18581|CTR2_MOUSE Cationic amino acid transporter 2 OS=Mus musculus OX=10090 GN=Slc7a2 PE=1 SV=3	90016450	90331780	121614600	37885340	144892900	156151500	72221490	155588800	75257320	120848400	114319600	172538500	118012200	67607770	102478200	142090800	71224850	84702740	139300700	46126040	100346200	189391700	97005500	63063210	121212800	128632400	163591700	127503500	82914610	41744090	71264360	117836400	155044200	51771740	72773900	79578100	92186900	44485660
P18760	COF1_MOUSE Cofilin-1 OS=Mus musculus OX=10090 GN=Cfl1 PE=1 SV=3	Cfl1	sp|P18760|COF1_MOUSE Cofilin-1 OS=Mus musculus OX=10090 GN=Cfl1 PE=1 SV=3	sp|P18760|COF1_MOUSE Cofilin-1 OS=Mus musculus OX=10090 GN=Cfl1 PE=1 SV=3	39178740	27033180	34523440	20594450	56490640	50416400	48960900	38614930	39304470	59138870	52618330	40263610	59372560	9649445	44651260	33430670	38259460	31844300	53657560	8651945	6366038	15747880	7149658	7397157	4371651	9222031	18898270	18618620	11023790	5623456	10336870	10908850	9915247	7183611	9220553	9172983	10403990	18166710
P18828	SDC1_MOUSE Syndecan-1 OS=Mus musculus OX=10090 GN=Sdc1 PE=1 SV=1	Sdc1	sp|P18828|SDC1_MOUSE Syndecan-1 OS=Mus musculus OX=10090 GN=Sdc1 PE=1 SV=1	sp|P18828|SDC1_MOUSE Syndecan-1 OS=Mus musculus OX=10090 GN=Sdc1 PE=1 SV=1	15120310	8753189	8702477	5658673	14066780	7814169	7054441	9201914	5306856	20704190	11700510	13947950	7373932	3642123	11120090	6745399	7766680	6260368	4292685	16185620	7620689	11457150	6152674	4237075	12936370	10918540	8994512	10118000	4349589	6441523	12017960	9381018	9103662	10846170	10580090	7159162	9102273	4858231
P18894	OXDA_MOUSE D-amino-acid oxidase OS=Mus musculus OX=10090 GN=Dao PE=1 SV=3	Dao	sp|P18894|OXDA_MOUSE D-amino-acid oxidase OS=Mus musculus OX=10090 GN=Dao PE=1 SV=3	sp|P18894|OXDA_MOUSE D-amino-acid oxidase OS=Mus musculus OX=10090 GN=Dao PE=1 SV=3	24001270	6335650	7908796	9263608	10200050	5237049	7240370	9260720	5499269	5046913	8124751	6431615	6351558	2869024	9671549	6569669	9135774	4655132	6079386	676121500	5173338	8557893	4713372	10095580	4348758	6161327	8823552	6124670	7532809	4345236	3588930	6581539	8899842	5600443	6771296	5784758	9397647	5435733
P19001	K1C19_MOUSE Keratin, type I cytoskeletal 19 OS=Mus musculus OX=10090 GN=Krt19 PE=1 SV=1	Krt19	sp|P19001|K1C19_MOUSE Keratin, type I cytoskeletal 19 OS=Mus musculus OX=10090 GN=Krt19 PE=1 SV=1	sp|P19001|K1C19_MOUSE Keratin, type I cytoskeletal 19 OS=Mus musculus OX=10090 GN=Krt19 PE=1 SV=1	1599275	701458	199255	185556	654512	436303	163553	165303	240858	1129643	451408	386988	341852	29938.2	388157	168928	203971	186192	139069	198047	157731	239289	217782	131972	49657.3	131444	194278	143465	68040.9	257242	240691	72010.4	131248	249267	156889	91040.8	112534	93323.6
P19096	FAS_MOUSE Fatty acid synthase OS=Mus musculus OX=10090 GN=Fasn PE=1 SV=2	Fasn	sp|P19096|FAS_MOUSE Fatty acid synthase OS=Mus musculus OX=10090 GN=Fasn PE=1 SV=2	sp|P19096|FAS_MOUSE Fatty acid synthase OS=Mus musculus OX=10090 GN=Fasn PE=1 SV=2	2551819000	1524517000	1564938000	1209780000	2616857000	1488656000	2071324000	1640583000	2504454000	2501838000	3181264000	1684870000	1391974000	846283700	1311944000	1539612000	1894133000	1153512000	3798422000	660884500	1199854000	1462273000	1281542000	723492700	1192583000	1014035000	739008600	881570800	1353185000	796225800	674773200	1296817000	1279090000	304298100	768459700	739674200	874393000	423902500
P19157	GSTP1_MOUSE Glutathione S-transferase P 1 OS=Mus musculus OX=10090 GN=Gstp1 PE=1 SV=2	Gstp1	sp|P19157|GSTP1_MOUSE Glutathione S-transferase P 1 OS=Mus musculus OX=10090 GN=Gstp1 PE=1 SV=2	sp|P19157|GSTP1_MOUSE Glutathione S-transferase P 1 OS=Mus musculus OX=10090 GN=Gstp1 PE=1 SV=2	109278800	111545200	223456800	187294000	127735800	134047100	162964300	158142300	154737700	138860900	179957900	211170200	173871200	108615900	116874200	176127300	325360900	103662200	159533600	50741940	63684010	120482000	71635420	86320570	53632410	35785540	172263700	145623000	73645790	55017930	100964200	149248200	114989100	36206770	67397870	52823530	56608170	71390760
P19221	THRB_MOUSE Prothrombin OS=Mus musculus OX=10090 GN=F2 PE=1 SV=1	F2	sp|P19221|THRB_MOUSE Prothrombin OS=Mus musculus OX=10090 GN=F2 PE=1 SV=1	sp|P19221|THRB_MOUSE Prothrombin OS=Mus musculus OX=10090 GN=F2 PE=1 SV=1	92482630	115560900	123923900	101057000	167273400	164859300	170974400	188896200	177892800	118410200	147053000	77026400	112153400	118905000	136340400	193050600	146471300	164581200	192908700	15635160	117831000	100161100	97524520	104899800	13010130	48083370	91371880	108976400	85090320	21935810	68722670	80847960	173371000	28065420	60434220	66832090	74159900	70802960
P19324	SERPH_MOUSE Serpin H1 OS=Mus musculus OX=10090 GN=Serpinh1 PE=1 SV=3	Serpinh1	sp|P19324|SERPH_MOUSE Serpin H1 OS=Mus musculus OX=10090 GN=Serpinh1 PE=1 SV=3	sp|P19324|SERPH_MOUSE Serpin H1 OS=Mus musculus OX=10090 GN=Serpinh1 PE=1 SV=3	16385200	25262030	58136790	32139880	11848690	19221330	35277920	36083180	26650970	19856210	31872630	29793050	53765660	20784110	14181650	21940940	36044140	23907400	29590110	7678811	14606990	25007010	13961520	19284600	3057039	8670175	28525550	21104130	16278620	9315411	11997180	27691630	23453120	5812351	12203550	14258840	15473670	20158830
P19536	COX5B_MOUSE Cytochrome c oxidase subunit 5B, mitochondrial OS=Mus musculus OX=10090 GN=Cox5b PE=1 SV=1	Cox5b	sp|P19536|COX5B_MOUSE Cytochrome c oxidase subunit 5B, mitochondrial OS=Mus musculus OX=10090 GN=Cox5b PE=1 SV=1	sp|P19536|COX5B_MOUSE Cytochrome c oxidase subunit 5B, mitochondrial OS=Mus musculus OX=10090 GN=Cox5b PE=1 SV=1	346960000	271002900	116645700	78821650	309332200	188951800	125236100	204226000	154620500	318007700	262179200	81740260	161372800	41094420	219317400	151144300	127230300	134824400	149533300	176385900	47675910	62516860	35486850	47959050	49250260	35723990	53472540	70349950	27524480	78056460	83670090	43934200	58677060	67441920	30847550	42353070	47268000	39061180
P19639	GSTM3_MOUSE Glutathione S-transferase Mu 3 OS=Mus musculus OX=10090 GN=Gstm3 PE=1 SV=2	Gstm3	sp|P19639|GSTM3_MOUSE Glutathione S-transferase Mu 3 OS=Mus musculus OX=10090 GN=Gstm3 PE=1 SV=2	sp|P19639|GSTM3_MOUSE Glutathione S-transferase Mu 3 OS=Mus musculus OX=10090 GN=Gstm3 PE=1 SV=2	11631150	9959250	16575320	13628290	14643600	11399820	9138171	12289650	12662490	17621510	21880630	16250990	11998510	8507051	9879973	11301790	23542260	5248401	16618120	3832766	4842361	6396713	5032432	5186954	8351690	6907678	24375280	13576570	5953602	2616745	6034305	10960880	11323750	2672027	4045460	3420650	7725033	10599900
P19783	COX41_MOUSE Cytochrome c oxidase subunit 4 isoform 1, mitochondrial OS=Mus musculus OX=10090 GN=Cox4i1 PE=1 SV=2	Cox4i1	sp|P19783|COX41_MOUSE Cytochrome c oxidase subunit 4 isoform 1, mitochondrial OS=Mus musculus OX=10090 GN=Cox4i1 PE=1 SV=2	sp|P19783|COX41_MOUSE Cytochrome c oxidase subunit 4 isoform 1, mitochondrial OS=Mus musculus OX=10090 GN=Cox4i1 PE=1 SV=2	2574960000	1707703000	2159122000	1415415000	2331625000	1515748000	1358792000	2300020000	1186885000	2728815000	2024498000	2217791000	1655519000	971404400	2170000000	1289970000	1827812000	1553222000	1145777000	2797805000	1386120000	2210774000	2044656000	1065788000	2514042000	2147245000	2371993000	2318508000	1121423000	1534222000	2002088000	1783101000	1950358000	2364307000	1955157000	1820237000	2097095000	1289638000
P20029	BIP_MOUSE Endoplasmic reticulum chaperone BiP OS=Mus musculus OX=10090 GN=Hspa5 PE=1 SV=3	Hspa5	sp|P20029|BIP_MOUSE Endoplasmic reticulum chaperone BiP OS=Mus musculus OX=10090 GN=Hspa5 PE=1 SV=3	sp|P20029|BIP_MOUSE Endoplasmic reticulum chaperone BiP OS=Mus musculus OX=10090 GN=Hspa5 PE=1 SV=3	1688017000	2951982000	5453499000	3445645000	1954624000	3454706000	6037353000	5612335000	4245629000	2304433000	2922089000	5598733000	4065819000	3494841000	2573366000	3016774000	6509135000	4116207000	4272152000	1269710000	2611719000	5051614000	4462116000	3813457000	1180760000	2612728000	6260292000	5666576000	4801790000	1434914000	2630858000	5246626000	5157436000	3022343000	3977187000	4789069000	3379834000	5230383000
P20040	HB24_MOUSE H-2 class II histocompatibility antigen, E-Q beta chain OS=Mus musculus OX=10090 PE=1 SV=1	NoGeneName	sp|P20040|HB24_MOUSE H-2 class II histocompatibility antigen, E-Q beta chain OS=Mus musculus OX=10090 PE=1 SV=1	sp|P20040|HB24_MOUSE H-2 class II histocompatibility antigen, E-Q beta chain OS=Mus musculus OX=10090 PE=1 SV=1	0	101625	990401	375551	75836	122422	125621	444120	137568	196694	135202	231237	470630	328750	0	0	435060	68240.6	11183.5	12776.2	71676.9	184387	74510.4	158106	27523.8	128169	2217352	592126	87519.8	16242.2	25574.8	479924	300037	64880	10899.7	477573	83378	1019970
P20060	HEXB_MOUSE Beta-hexosaminidase subunit beta OS=Mus musculus OX=10090 GN=Hexb PE=1 SV=2	Hexb	sp|P20060|HEXB_MOUSE Beta-hexosaminidase subunit beta OS=Mus musculus OX=10090 GN=Hexb PE=1 SV=2	sp|P20060|HEXB_MOUSE Beta-hexosaminidase subunit beta OS=Mus musculus OX=10090 GN=Hexb PE=1 SV=2	46583180	49507740	140700400	115226200	49380270	60942090	64296800	109301200	45117100	59981000	61402770	123647400	82740820	128802800	73251440	40233300	97115480	61386730	51332060	156160100	201474600	193461900	240251800	125648000	267395800	237550200	275853600	274432500	173298300	160931600	137520300	168748000	241341600	304159800	227797400	250497700	280300100	217779300
P20108	PRDX3_MOUSE Thioredoxin-dependent peroxide reductase, mitochondrial OS=Mus musculus OX=10090 GN=Prdx3 PE=1 SV=1	Prdx3	sp|P20108|PRDX3_MOUSE Thioredoxin-dependent peroxide reductase, mitochondrial OS=Mus musculus OX=10090 GN=Prdx3 PE=1 SV=1	sp|P20108|PRDX3_MOUSE Thioredoxin-dependent peroxide reductase, mitochondrial OS=Mus musculus OX=10090 GN=Prdx3 PE=1 SV=1	864353300	512374000	646325800	384999100	1003681000	529699500	425944100	608771500	317737500	991720700	673800400	677796800	518660100	326988200	750108300	416603000	528138500	460311300	277589000	1330342000	726072600	769778700	661979700	298951200	1460781000	1099506000	1000848000	919184600	460464900	770078000	740472200	643661700	597951100	989232500	876409500	635526900	957400000	504588200
P20152	VIME_MOUSE Vimentin OS=Mus musculus OX=10090 GN=Vim PE=1 SV=3	Vim	sp|P20152|VIME_MOUSE Vimentin OS=Mus musculus OX=10090 GN=Vim PE=1 SV=3	sp|P20152|VIME_MOUSE Vimentin OS=Mus musculus OX=10090 GN=Vim PE=1 SV=3	27672720	9781352	14363330	7813080	11154270	15997830	13915960	10792380	8884670	14107800	10728850	15451800	14680810	3100687	12780650	7741276	20339110	9424119	11129590	7324493	6085022	9604142	7114505	4914412	7415714	9328062	22984620	11261310	5833334	5139595	10181280	10930100	6322454	9799389	13537910	10038590	4626811	10897590
P20491	FCERG_MOUSE High affinity immunoglobulin epsilon receptor subunit gamma OS=Mus musculus OX=10090 GN=Fcer1g PE=1 SV=1	Fcer1g	sp|P20491|FCERG_MOUSE High affinity immunoglobulin epsilon receptor subunit gamma OS=Mus musculus OX=10090 GN=Fcer1g PE=1 SV=1	sp|P20491|FCERG_MOUSE High affinity immunoglobulin epsilon receptor subunit gamma OS=Mus musculus OX=10090 GN=Fcer1g PE=1 SV=1	2505535	4923404	24897590	13520650	3681358	5442732	8749164	7743120	6767186	2004631	7585944	5634792	12627880	12251550	4190371	4530305	10909150	7145734	5729991	1137441	3564175	6761556	6699489	9087663	414863	1377522	9554195	13805220	4490588	2958355	5018219	6589557	14812250	2601267	3360603	6772456	6176967	14205520
P20852	CP2A5_MOUSE Cytochrome P450 2A5 OS=Mus musculus OX=10090 GN=Cyp2a5 PE=2 SV=1	Cyp2a5	sp|P20852|CP2A5_MOUSE Cytochrome P450 2A5 OS=Mus musculus OX=10090 GN=Cyp2a5 PE=2 SV=1	sp|P20852|CP2A5_MOUSE Cytochrome P450 2A5 OS=Mus musculus OX=10090 GN=Cyp2a5 PE=2 SV=1	173418200	368150000	417028600	625854700	232154500	294866500	231835500	541341000	288732700	221909100	319554000	485255300	385779400	214340000	249439400	193495800	384497200	226976000	401312100	77751180	288453200	520128000	694173200	434430600	218786300	367598200	735807300	620606300	354365000	148815300	223025900	428649200	813471300	226996900	275200700	483497100	675837900	423247600
P20918	PLMN_MOUSE Plasminogen OS=Mus musculus OX=10090 GN=Plg PE=1 SV=3	Plg	sp|P20918|PLMN_MOUSE Plasminogen OS=Mus musculus OX=10090 GN=Plg PE=1 SV=3	sp|P20918|PLMN_MOUSE Plasminogen OS=Mus musculus OX=10090 GN=Plg PE=1 SV=3	122918100	244982100	192389600	170871200	167660200	186284200	271444800	303493300	203084700	167898200	271114800	184117800	210203300	200829700	174918600	260449100	236648900	228253000	241033900	48611230	221276600	149240400	173402600	223072400	22708170	69391340	112749500	165082100	139653800	35298030	130534300	114299300	294613500	46657300	105272300	120482500	160396000	119430200
P21107	TPM3_MOUSE Tropomyosin alpha-3 chain OS=Mus musculus OX=10090 GN=Tpm3 PE=1 SV=3	Tpm3	sp|P21107|TPM3_MOUSE Tropomyosin alpha-3 chain OS=Mus musculus OX=10090 GN=Tpm3 PE=1 SV=3	sp|P21107|TPM3_MOUSE Tropomyosin alpha-3 chain OS=Mus musculus OX=10090 GN=Tpm3 PE=1 SV=3	3985882	4528271	7984819	4702228	4736146	5313503	5940086	4660471	3009849	9804695	5880993	10720520	4536940	3921416	5433400	3467185	8151244	4073822	4734456	5905030	5993617	9882023	5381338	2451753	6057153	6423549	14377230	9275638	4981849	2980456	6666243	7491231	6408727	7036247	5251179	5834474	8106947	9746917
P21278	GNA11_MOUSE Guanine nucleotide-binding protein subunit alpha-11 OS=Mus musculus OX=10090 GN=Gna11 PE=1 SV=1	Gna11	sp|P21278|GNA11_MOUSE Guanine nucleotide-binding protein subunit alpha-11 OS=Mus musculus OX=10090 GN=Gna11 PE=1 SV=1	sp|P21278|GNA11_MOUSE Guanine nucleotide-binding protein subunit alpha-11 OS=Mus musculus OX=10090 GN=Gna11 PE=1 SV=1	34940320	34406780	30143200	29859720	20777630	32215600	32751780	32739200	22616630	34161350	32822950	65597370	29109040	33203910	27102960	27548100	42874800	28872820	33789950	40016900	39193280	63848540	43556200	41652980	35072000	40253670	66475760	65612060	51984880	29724890	43546730	65290620	81508500	36214000	51974490	40369720	49447600	32665310
P21279	GNAQ_MOUSE Guanine nucleotide-binding protein G(q) subunit alpha OS=Mus musculus OX=10090 GN=Gnaq PE=1 SV=4	Gnaq	sp|P21279|GNAQ_MOUSE Guanine nucleotide-binding protein G(q) subunit alpha OS=Mus musculus OX=10090 GN=Gnaq PE=1 SV=4	sp|P21279|GNAQ_MOUSE Guanine nucleotide-binding protein G(q) subunit alpha OS=Mus musculus OX=10090 GN=Gnaq PE=1 SV=4	8567294	7223655	7186940	5968983	5745854	7373649	9113723	8666853	4426004	8918682	9817137	17738080	8210689	8224213	6680956	7116693	12680350	5979885	7528658	13329530	9137870	12417620	14093080	9206037	8296761	9533049	20543590	16340220	14222490	6916489	11553930	14328840	23817070	10989500	13691750	11449180	11320250	10909410
P21440	MDR3_MOUSE Phosphatidylcholine translocator ABCB4 OS=Mus musculus OX=10090 GN=Abcb4 PE=1 SV=2	Abcb4	sp|P21440|MDR3_MOUSE Phosphatidylcholine translocator ABCB4 OS=Mus musculus OX=10090 GN=Abcb4 PE=1 SV=2	sp|P21440|MDR3_MOUSE Phosphatidylcholine translocator ABCB4 OS=Mus musculus OX=10090 GN=Abcb4 PE=1 SV=2	35414800	26918440	20032890	14022340	15715330	13163500	13624160	17347590	17878410	28172400	54606410	22469110	13039160	23982650	20151990	34122590	12827410	19909520	25387880	33035430	36899450	23096560	12317570	15296980	10387400	12906370	33770480	18790700	22082660	15845550	24656560	22524040	33794410	14074770	13756650	14466710	14431080	19947730
P21550	ENOB_MOUSE Beta-enolase OS=Mus musculus OX=10090 GN=Eno3 PE=1 SV=3	Eno3	sp|P21550|ENOB_MOUSE Beta-enolase OS=Mus musculus OX=10090 GN=Eno3 PE=1 SV=3	sp|P21550|ENOB_MOUSE Beta-enolase OS=Mus musculus OX=10090 GN=Eno3 PE=1 SV=3	70684120	35009060	37653400	24818630	64834430	38404280	56903490	33447930	48220350	86858100	84647240	62391710	44620670	19663020	42120460	47336240	56638820	25762860	46018540	21284240	24853910	15042530	23515960	17320430	14065930	13761130	15906280	28545670	19568400	16678480	29778880	22581520	43474450	11159350	19793200	12457500	22095630	11306200
P21614	VTDB_MOUSE Vitamin D-binding protein OS=Mus musculus OX=10090 GN=Gc PE=1 SV=2	Gc	sp|P21614|VTDB_MOUSE Vitamin D-binding protein OS=Mus musculus OX=10090 GN=Gc PE=1 SV=2	sp|P21614|VTDB_MOUSE Vitamin D-binding protein OS=Mus musculus OX=10090 GN=Gc PE=1 SV=2	86107780	205968100	152004400	156736600	125418300	192704600	265274000	318198400	207281100	88385900	197251800	169349000	213149300	126855300	167910000	199227300	239418100	226998900	240358400	43444350	130163900	118969200	150807500	171924700	21094200	71972210	119669900	152019100	151710600	29124960	83531120	93141130	189938500	37620010	77580980	90842310	152713700	118737500
P21619	LMNB2_MOUSE Lamin-B2 OS=Mus musculus OX=10090 GN=Lmnb2 PE=1 SV=2	Lmnb2	sp|P21619|LMNB2_MOUSE Lamin-B2 OS=Mus musculus OX=10090 GN=Lmnb2 PE=1 SV=2	sp|P21619|LMNB2_MOUSE Lamin-B2 OS=Mus musculus OX=10090 GN=Lmnb2 PE=1 SV=2	674238	225430	1761708	403230	296913	600919	575132	566781	264770	431259	493150	266798	706418	168424	489347	523137	636635	288711	635283	258645	277492	754727	312270	837551	89017.9	154541	345871	356934	417877	292562	402551	165792	233980	329323	290528	269021	484751	412198
P21956	MFGM_MOUSE Lactadherin OS=Mus musculus OX=10090 GN=Mfge8 PE=1 SV=3	Mfge8	sp|P21956|MFGM_MOUSE Lactadherin OS=Mus musculus OX=10090 GN=Mfge8 PE=1 SV=3	sp|P21956|MFGM_MOUSE Lactadherin OS=Mus musculus OX=10090 GN=Mfge8 PE=1 SV=3	804202	651523	1568194	1024647	1152394	635610	994059	952592	689945	653146	881567	1297306	811625	331751	1327402	716563	920994	949529	876996	415205	768882	830510	618728	857681	307127	649010	584542	904421	539359	267542	478418	757365	966788	548662	495583	526863	358396	782763
P21958	TAP1_MOUSE Antigen peptide transporter 1 OS=Mus musculus OX=10090 GN=Tap1 PE=1 SV=3	Tap1	sp|P21958|TAP1_MOUSE Antigen peptide transporter 1 OS=Mus musculus OX=10090 GN=Tap1 PE=1 SV=3	sp|P21958|TAP1_MOUSE Antigen peptide transporter 1 OS=Mus musculus OX=10090 GN=Tap1 PE=1 SV=3	11288060	22167800	154174000	96642990	12351580	21360590	33867430	47280200	40570120	12504390	25441060	44195850	99126350	73035820	12453080	17295050	55705400	23630510	29354540	5627582	23167120	60122230	36174980	32577630	6769631	15659280	156651600	137731500	33970780	13422510	19255590	83993810	44403240	17945890	20576780	78200140	33068820	116162600
P21981	TGM2_MOUSE Protein-glutamine gamma-glutamyltransferase 2 OS=Mus musculus OX=10090 GN=Tgm2 PE=1 SV=4	Tgm2	sp|P21981|TGM2_MOUSE Protein-glutamine gamma-glutamyltransferase 2 OS=Mus musculus OX=10090 GN=Tgm2 PE=1 SV=4	sp|P21981|TGM2_MOUSE Protein-glutamine gamma-glutamyltransferase 2 OS=Mus musculus OX=10090 GN=Tgm2 PE=1 SV=4	131762800	131981800	256592800	149057900	142897200	129203100	168666100	136705500	127554500	171902400	194549900	187984600	189371700	111765900	135730400	142421000	231162500	95209360	158250700	75924350	134186100	135521600	108208100	79943100	68512320	60620760	210594100	173624000	97990670	73483520	100666900	151426000	150523300	74220260	95041630	100789200	124623800	160516900
P22272	IL6RA_MOUSE Interleukin-6 receptor subunit alpha OS=Mus musculus OX=10090 GN=Il6ra PE=2 SV=2	Il6ra	sp|P22272|IL6RA_MOUSE Interleukin-6 receptor subunit alpha OS=Mus musculus OX=10090 GN=Il6ra PE=2 SV=2	sp|P22272|IL6RA_MOUSE Interleukin-6 receptor subunit alpha OS=Mus musculus OX=10090 GN=Il6ra PE=2 SV=2	487185	501977	558375	336181	835827	806302	820426	957308	594146	751284	468457	487116	292695	268979	566470	1190124	544380	354123	812540	171710	223848	238972	454673	439622	78980.8	151494	343406	552542	445553	98661.4	216539	256111	512292	366406	163526	503912	380326	400698
P22315	HEMH_MOUSE Ferrochelatase, mitochondrial OS=Mus musculus OX=10090 GN=Fech PE=1 SV=2	Fech	sp|P22315|HEMH_MOUSE Ferrochelatase, mitochondrial OS=Mus musculus OX=10090 GN=Fech PE=1 SV=2	sp|P22315|HEMH_MOUSE Ferrochelatase, mitochondrial OS=Mus musculus OX=10090 GN=Fech PE=1 SV=2	250282700	173358400	169660900	100400500	245354700	174390500	130174500	189234100	106634800	279271600	189891000	203776200	139425600	62398500	195979500	137961300	160461500	121259400	92399300	219051700	126213700	163410100	124522900	81583800	141371200	112462900	124044500	130191900	73258360	164800700	186820000	115108300	124378600	153853400	128331000	79918530	142725900	66959740
P22437	PGH1_MOUSE Prostaglandin G/H synthase 1 OS=Mus musculus OX=10090 GN=Ptgs1 PE=1 SV=1	Ptgs1	sp|P22437|PGH1_MOUSE Prostaglandin G/H synthase 1 OS=Mus musculus OX=10090 GN=Ptgs1 PE=1 SV=1	sp|P22437|PGH1_MOUSE Prostaglandin G/H synthase 1 OS=Mus musculus OX=10090 GN=Ptgs1 PE=1 SV=1	4077156	6106808	33914100	19913460	2094269	6080808	14988850	14141840	11519830	3983051	10895460	13651430	20892170	17315150	3959293	5746043	12333100	8734536	13521500	3818510	11201480	13366940	23095830	15004350	7076177	8051347	43715410	35227950	21412810	8823116	10498610	18548660	26090470	12602420	12389900	30188740	27785550	31693890
P22599	A1AT2_MOUSE Alpha-1-antitrypsin 1-2 OS=Mus musculus OX=10090 GN=Serpina1b PE=1 SV=2	Serpina1b	sp|P22599|A1AT2_MOUSE Alpha-1-antitrypsin 1-2 OS=Mus musculus OX=10090 GN=Serpina1b PE=1 SV=2	sp|P22599|A1AT2_MOUSE Alpha-1-antitrypsin 1-2 OS=Mus musculus OX=10090 GN=Serpina1b PE=1 SV=2	23362530	55297420	33219410	35492070	35039430	46684510	57935490	68820760	37826150	36765070	64065810	38608910	44407730	61078610	55961210	73410060	53047700	69315190	47111780	13616580	97741050	52139680	44728680	69605220	24303820	46955060	62028340	69397050	57047050	16787410	53075610	42510730	111096400	39612800	45390380	65029350	57930780	50211340
P22892	AP1G1_MOUSE AP-1 complex subunit gamma-1 OS=Mus musculus OX=10090 GN=Ap1g1 PE=1 SV=3	Ap1g1	sp|P22892|AP1G1_MOUSE AP-1 complex subunit gamma-1 OS=Mus musculus OX=10090 GN=Ap1g1 PE=1 SV=3	sp|P22892|AP1G1_MOUSE AP-1 complex subunit gamma-1 OS=Mus musculus OX=10090 GN=Ap1g1 PE=1 SV=3	6810164	4203624	13636000	11442320	5398642	6296600	8948668	13667480	10768210	8367845	8831742	14260200	13308870	9084361	8567689	8661887	9500605	10144950	11075270	3924013	7384133	24019570	12668010	11948370	4987158	6348665	19984930	17222030	12684360	4823169	6382765	14466920	16711460	4859725	8301363	18937320	11889360	11451070
P23116	EIF3A_MOUSE Eukaryotic translation initiation factor 3 subunit A OS=Mus musculus OX=10090 GN=Eif3a PE=1 SV=5	Eif3a	sp|P23116|EIF3A_MOUSE Eukaryotic translation initiation factor 3 subunit A OS=Mus musculus OX=10090 GN=Eif3a PE=1 SV=5	sp|P23116|EIF3A_MOUSE Eukaryotic translation initiation factor 3 subunit A OS=Mus musculus OX=10090 GN=Eif3a PE=1 SV=5	11430180	13814570	18942790	11864350	25187190	19476530	14555870	15188110	19796570	20979490	15232840	15170700	22175200	11312120	23365220	21057490	11971730	9675649	19963410	5861049	10473190	13582120	15864140	11420490	11614830	11029830	12765230	19800480	20625230	14017690	12467880	11297050	16167080	4009553	7429095	10810540	11165740	9803662
P23249	MOV10_MOUSE Putative helicase MOV-10 OS=Mus musculus OX=10090 GN=Mov10 PE=1 SV=2	Mov10	sp|P23249|MOV10_MOUSE Putative helicase MOV-10 OS=Mus musculus OX=10090 GN=Mov10 PE=1 SV=2	sp|P23249|MOV10_MOUSE Putative helicase MOV-10 OS=Mus musculus OX=10090 GN=Mov10 PE=1 SV=2	5431092	4842760	6802982	3707017	3683906	2563785	3158554	3735544	4993212	4082486	3398484	7555023	2978735	4287688	1871742	2633120	5002782	2567290	3186595	2559482	4913134	10927150	5136199	3499526	2411398	5335818	7442877	4689972	5069912	2272503	1472064	3019209	6720715	1319267	4270684	5647718	4308958	5196400
P23492	PNPH_MOUSE Purine nucleoside phosphorylase OS=Mus musculus OX=10090 GN=Pnp PE=1 SV=2	Pnp	sp|P23492|PNPH_MOUSE Purine nucleoside phosphorylase OS=Mus musculus OX=10090 GN=Pnp PE=1 SV=2	sp|P23492|PNPH_MOUSE Purine nucleoside phosphorylase OS=Mus musculus OX=10090 GN=Pnp PE=1 SV=2	88769080	73480780	101129300	72271140	63920580	56866450	83704180	71757990	84764890	70802180	103672900	149182000	95629790	62376780	63621880	90831940	90602850	56824260	101862100	39208480	69185320	105929000	69937770	64334090	47927040	48510830	75215850	101549500	95199750	41901870	61384980	90450380	116410000	34449340	72749060	57410990	74912970	60970130
P23506	PIMT_MOUSE Protein-L-isoaspartate(D-aspartate) O-methyltransferase OS=Mus musculus OX=10090 GN=Pcmt1 PE=1 SV=3	Pcmt1	sp|P23506|PIMT_MOUSE Protein-L-isoaspartate(D-aspartate) O-methyltransferase OS=Mus musculus OX=10090 GN=Pcmt1 PE=1 SV=3	sp|P23506|PIMT_MOUSE Protein-L-isoaspartate(D-aspartate) O-methyltransferase OS=Mus musculus OX=10090 GN=Pcmt1 PE=1 SV=3	533910	565170	724717	341294	367882	675006	503111	549121	594260	578507	535534	287473	651209	94521.3	404812	397058	471823	185911	294521	269200	579122	518349	768683	462691	346968	195317	580258	545616	580886	89116.1	328598	185810	217583	446742	614030	294036	293172	390610
P23589	CAH5A_MOUSE Carbonic anhydrase 5A, mitochondrial OS=Mus musculus OX=10090 GN=Ca5a PE=1 SV=2	Ca5a	sp|P23589|CAH5A_MOUSE Carbonic anhydrase 5A, mitochondrial OS=Mus musculus OX=10090 GN=Ca5a PE=1 SV=2	sp|P23589|CAH5A_MOUSE Carbonic anhydrase 5A, mitochondrial OS=Mus musculus OX=10090 GN=Ca5a PE=1 SV=2	163584200	101455400	41006130	21496290	181267900	74866840	51732700	73976280	39596710	191120500	103831200	69549460	59366960	16802110	104100400	72367140	38574380	52906420	40897270	53853220	21159140	53014570	21130540	34013330	33230130	40400630	47182240	23503280	15021850	63897140	40524710	35719010	21134770	38935420	26865530	28807440	27102670	10447670
P23591	FCL_MOUSE GDP-L-fucose synthase OS=Mus musculus OX=10090 GN=Tsta3 PE=1 SV=3	Tsta3	sp|P23591|FCL_MOUSE GDP-L-fucose synthase OS=Mus musculus OX=10090 GN=Tsta3 PE=1 SV=3	sp|P23591|FCL_MOUSE GDP-L-fucose synthase OS=Mus musculus OX=10090 GN=Tsta3 PE=1 SV=3	6033477	3901185	5846010	3173718	5154786	4292897	4028617	3833355	8528824	4960295	7014433	3698605	6372920	1370208	4744645	7010999	3140528	3660766	7656896	793916	1349279	2423539	1376062	1709057	1119581	717410	1132292	1328634	2026644	617569	1187501	1670273	1715570	719249	676366	577507	768456	785556
P23780	BGAL_MOUSE Beta-galactosidase OS=Mus musculus OX=10090 GN=Glb1 PE=1 SV=1	Glb1	sp|P23780|BGAL_MOUSE Beta-galactosidase OS=Mus musculus OX=10090 GN=Glb1 PE=1 SV=1	sp|P23780|BGAL_MOUSE Beta-galactosidase OS=Mus musculus OX=10090 GN=Glb1 PE=1 SV=1	39309690	37072650	95027330	104180400	38566160	48117440	47611670	79870720	44461490	43861660	44019710	144691900	69258210	124577000	51002730	39887670	104398600	45872750	51999150	243866300	312357400	248102600	271054600	139594100	402460200	346100100	479012100	268949800	259879500	164161000	163630900	221320800	285216400	399555200	350968400	342998100	281203300	299213900
P23953	EST1C_MOUSE Carboxylesterase 1C OS=Mus musculus OX=10090 GN=Ces1c PE=1 SV=4	Ces1c	sp|P23953|EST1C_MOUSE Carboxylesterase 1C OS=Mus musculus OX=10090 GN=Ces1c PE=1 SV=4	sp|P23953|EST1C_MOUSE Carboxylesterase 1C OS=Mus musculus OX=10090 GN=Ces1c PE=1 SV=4	54566140	161539100	150970200	148312200	80715540	152156700	174163200	222574300	130591900	71168880	185585200	189926000	167859500	178770400	142804000	171564900	180321400	185278100	146014000	48680880	262380700	214124600	222332500	263233100	68160880	126211800	349236300	160480500	214561400	51417340	155602500	187949100	453140500	135047200	160525700	217449500	179880800	209453100
P24063	ITAL_MOUSE Integrin alpha-L OS=Mus musculus OX=10090 GN=Itgal PE=1 SV=2	Itgal	sp|P24063|ITAL_MOUSE Integrin alpha-L OS=Mus musculus OX=10090 GN=Itgal PE=1 SV=2	sp|P24063|ITAL_MOUSE Integrin alpha-L OS=Mus musculus OX=10090 GN=Itgal PE=1 SV=2	12486340	11621960	47354650	32476950	10968150	15091630	23235770	17756920	10918940	17245950	18040770	21434620	37465890	26600250	10593970	10622130	25174010	13539640	14485690	6876343	17428480	23486620	26163110	14562680	6350101	11908630	72191120	52390790	20702340	13148910	19894070	33516670	27023120	17319350	22511660	34576170	33769560	68026600
P24270	CATA_MOUSE Catalase OS=Mus musculus OX=10090 GN=Cat PE=1 SV=4	Cat	sp|P24270|CATA_MOUSE Catalase OS=Mus musculus OX=10090 GN=Cat PE=1 SV=4	sp|P24270|CATA_MOUSE Catalase OS=Mus musculus OX=10090 GN=Cat PE=1 SV=4	49788310000	49302640000	49351380000	50537110000	47627670000	53509360000	60485130000	68436540000	49673970000	64652600000	58281100000	71926790000	62296020000	37748570000	59146720000	56130870000	54081350000	63612170000	59803780000	42876970000	50213110000	45182890000	65763450000	66500000000	51458060000	54743160000	45666770000	50235720000	50822790000	39161750000	45678400000	41900210000	64577400000	42946980000	52702740000	43435900000	66055230000	45404790000
P24369	PPIB_MOUSE Peptidyl-prolyl cis-trans isomerase B OS=Mus musculus OX=10090 GN=Ppib PE=1 SV=2	Ppib	sp|P24369|PPIB_MOUSE Peptidyl-prolyl cis-trans isomerase B OS=Mus musculus OX=10090 GN=Ppib PE=1 SV=2	sp|P24369|PPIB_MOUSE Peptidyl-prolyl cis-trans isomerase B OS=Mus musculus OX=10090 GN=Ppib PE=1 SV=2	814393500	1568816000	1954478000	1438078000	777517000	1444192000	1980526000	2293654000	2006260000	856303400	1585979000	1993761000	1812297000	1120579000	1027033000	1412744000	2140423000	1620219000	1940166000	417209900	1092952000	1148959000	1116798000	1378701000	194617400	540736300	676344200	1067029000	1120269000	260680300	917899800	1142315000	1433815000	376218700	951920100	662941200	866702500	861864700
P24452	CAPG_MOUSE Macrophage-capping protein OS=Mus musculus OX=10090 GN=Capg PE=1 SV=2	Capg	sp|P24452|CAPG_MOUSE Macrophage-capping protein OS=Mus musculus OX=10090 GN=Capg PE=1 SV=2	sp|P24452|CAPG_MOUSE Macrophage-capping protein OS=Mus musculus OX=10090 GN=Capg PE=1 SV=2	137967	234404	1979420	577128	109877	217423	618210	389768	45551.5	545914	359904	796859	959078	524783	120533	312625	701841	17936.8	161653	846806	449698	879081	560471	127754	96951.4	192715	2162080	822375	202902	265746	471380	1030932	710118	545921	303896	398793	1142684	1646028
P24456	CP2DA_MOUSE Cytochrome P450 2D10 OS=Mus musculus OX=10090 GN=Cyp2d10 PE=1 SV=2	Cyp2d10	sp|P24456|CP2DA_MOUSE Cytochrome P450 2D10 OS=Mus musculus OX=10090 GN=Cyp2d10 PE=1 SV=2	sp|P24456|CP2DA_MOUSE Cytochrome P450 2D10 OS=Mus musculus OX=10090 GN=Cyp2d10 PE=1 SV=2	503636200	668459600	884741600	673945400	401387900	550676100	942144000	1088788000	891483500	555716200	720429700	1027543000	677340000	622495300	494156900	757955000	903997500	903170100	901361100	236230900	675680600	1335212000	1302082000	908227700	357180600	586864100	1446865000	1116759000	1227821000	315499500	533215700	1030168000	1530965000	618057600	802201600	1298424000	750647100	964562100
P24457	CP2DB_MOUSE Cytochrome P450 2D11 OS=Mus musculus OX=10090 GN=Cyp2d11 PE=2 SV=2	Cyp2d11	sp|P24457|CP2DB_MOUSE Cytochrome P450 2D11 OS=Mus musculus OX=10090 GN=Cyp2d11 PE=2 SV=2	sp|P24457|CP2DB_MOUSE Cytochrome P450 2D11 OS=Mus musculus OX=10090 GN=Cyp2d11 PE=2 SV=2	3877085	7383906	14214480	8294502	4773101	2538264	10233270	8450488	6981180	5982709	7456987	12741880	8330197	7386752	3582493	7233997	12921820	10717720	9581424	2682550	9392407	15315130	12177900	16949410	585706	6893881	11905520	10225960	17291870	3804424	4569204	12603140	14342260	5746315	8139010	14261800	19570060	11667980
P24472	GSTA4_MOUSE Glutathione S-transferase A4 OS=Mus musculus OX=10090 GN=Gsta4 PE=1 SV=3	Gsta4	sp|P24472|GSTA4_MOUSE Glutathione S-transferase A4 OS=Mus musculus OX=10090 GN=Gsta4 PE=1 SV=3	sp|P24472|GSTA4_MOUSE Glutathione S-transferase A4 OS=Mus musculus OX=10090 GN=Gsta4 PE=1 SV=3	56229690	50771980	48585240	30961350	57776620	51730430	48766950	54027220	76733160	79726510	73224020	49659630	54140640	22153130	48508970	71113270	50730520	36032150	85983920	11879380	18353570	37412450	29700780	24211610	17037250	13856030	33822800	30513850	25921610	17255880	21337710	37391920	43999130	8310117	17563720	21711240	24426450	13698390
P24527	LKHA4_MOUSE Leukotriene A-4 hydrolase OS=Mus musculus OX=10090 GN=Lta4h PE=1 SV=4	Lta4h	sp|P24527|LKHA4_MOUSE Leukotriene A-4 hydrolase OS=Mus musculus OX=10090 GN=Lta4h PE=1 SV=4	sp|P24527|LKHA4_MOUSE Leukotriene A-4 hydrolase OS=Mus musculus OX=10090 GN=Lta4h PE=1 SV=4	14707770	11650770	13785690	6464820	12821720	12715140	11316530	13570490	12786940	17033290	20068020	14967830	16540560	7497353	10995850	14955780	13852300	11231120	18223690	8562470	6662628	15567510	10796480	7052172	8012931	5518921	10149720	11478010	9952309	4588691	7990467	11475120	17143400	7036448	9267342	6162464	9775866	4996091
P24547	IMDH2_MOUSE Inosine-5'-monophosphate dehydrogenase 2 OS=Mus musculus OX=10090 GN=Impdh2 PE=1 SV=2	Impdh2	sp|P24547|IMDH2_MOUSE Inosine-5'-monophosphate dehydrogenase 2 OS=Mus musculus OX=10090 GN=Impdh2 PE=1 SV=2	sp|P24547|IMDH2_MOUSE Inosine-5'-monophosphate dehydrogenase 2 OS=Mus musculus OX=10090 GN=Impdh2 PE=1 SV=2	1073867	792694	567940	551907	939030	978225	1097480	502030	122417	1257827	1233412	1632956	335501	551520	1097880	899398	1254200	263579	735256	354739	473140	1236579	430799	284262	1299025	407558	967354	964629	786843	140473	780106	754728	545632	635003	388238	583239	687788	381128
P24549	AL1A1_MOUSE Retinal dehydrogenase 1 OS=Mus musculus OX=10090 GN=Aldh1a1 PE=1 SV=5	Aldh1a1	sp|P24549|AL1A1_MOUSE Retinal dehydrogenase 1 OS=Mus musculus OX=10090 GN=Aldh1a1 PE=1 SV=5	sp|P24549|AL1A1_MOUSE Retinal dehydrogenase 1 OS=Mus musculus OX=10090 GN=Aldh1a1 PE=1 SV=5	484848400	409237700	459452900	530516700	542739600	355913800	423462400	535598000	566111600	689519800	532806100	678677000	514818000	257880700	463656000	550621700	617424100	311045300	634773800	255509400	280920600	700885100	482909300	313121700	328258700	219925000	300288800	400814500	461550200	296902800	272809000	449680000	660706000	182051700	278459000	255533500	480516500	164436300
P24638	PPAL_MOUSE Lysosomal acid phosphatase OS=Mus musculus OX=10090 GN=Acp2 PE=1 SV=2	Acp2	sp|P24638|PPAL_MOUSE Lysosomal acid phosphatase OS=Mus musculus OX=10090 GN=Acp2 PE=1 SV=2	sp|P24638|PPAL_MOUSE Lysosomal acid phosphatase OS=Mus musculus OX=10090 GN=Acp2 PE=1 SV=2	16857080	17607630	53829630	70577870	25659710	24513870	32273300	35825960	19025410	23144920	18976220	38357170	37552090	45134500	27072300	21849060	45257960	22101090	19127120	34534740	55005430	54706690	76476710	39494630	67493990	59759410	151254600	98599030	76413340	31262230	38613910	64308810	71073690	55398600	65168370	79177710	76096440	100217400
P24668	MPRD_MOUSE Cation-dependent mannose-6-phosphate receptor OS=Mus musculus OX=10090 GN=M6pr PE=1 SV=1	M6pr	sp|P24668|MPRD_MOUSE Cation-dependent mannose-6-phosphate receptor OS=Mus musculus OX=10090 GN=M6pr PE=1 SV=1	sp|P24668|MPRD_MOUSE Cation-dependent mannose-6-phosphate receptor OS=Mus musculus OX=10090 GN=M6pr PE=1 SV=1	8408599	6650854	19337350	23163300	8877795	6980597	18117770	10582880	10688380	12172470	12330220	13668270	10136040	16877450	6257523	8075144	15884320	7989704	10567470	5673785	10119150	19192540	20494280	10958930	3909160	7296280	29095560	19770960	18670560	4352704	5248671	13552640	25251160	4918072	8935158	22269210	23786800	16746430
P24721	ASGR2_MOUSE Asialoglycoprotein receptor 2 OS=Mus musculus OX=10090 GN=Asgr2 PE=1 SV=1	Asgr2	sp|P24721|ASGR2_MOUSE Asialoglycoprotein receptor 2 OS=Mus musculus OX=10090 GN=Asgr2 PE=1 SV=1	sp|P24721|ASGR2_MOUSE Asialoglycoprotein receptor 2 OS=Mus musculus OX=10090 GN=Asgr2 PE=1 SV=1	22292990	23917250	35496240	27351320	27961620	23836900	30394750	28339000	38030870	43164680	31312140	38207240	22426180	24911530	21350510	34395370	27097070	32709050	43989760	13003190	30778460	61866870	39086060	36709970	11620340	16340220	33554420	26404100	42520250	11292150	20483460	32016960	55130220	10786470	17765290	38314910	37767720	19611230
P24815	3BHS1_MOUSE 3 beta-hydroxysteroid dehydrogenase/Delta 5-->4-isomerase type 1 OS=Mus musculus OX=10090 GN=Hsd3b1 PE=1 SV=3	Hsd3b1	sp|P24815|3BHS1_MOUSE 3 beta-hydroxysteroid dehydrogenase/Delta 5-->4-isomerase type 1 OS=Mus musculus OX=10090 GN=Hsd3b1 PE=1 SV=3	sp|P24815|3BHS1_MOUSE 3 beta-hydroxysteroid dehydrogenase/Delta 5-->4-isomerase type 1 OS=Mus musculus OX=10090 GN=Hsd3b1 PE=1 SV=3	36594440	51274040	47944880	43388330	35244470	38626890	43464100	53585970	45483670	35000410	42813460	39901550	32877490	18419620	37281400	41336390	50477170	32305490	43851890	70456630	22996050	48132710	32764840	34433040	19089460	24368180	64713030	46479670	29644810	90441250	28432930	44638560	60492440	55019560	29665650	54411790	16295930	23070560
P25444	RS2_MOUSE 40S ribosomal protein S2 OS=Mus musculus OX=10090 GN=Rps2 PE=1 SV=3	Rps2	sp|P25444|RS2_MOUSE 40S ribosomal protein S2 OS=Mus musculus OX=10090 GN=Rps2 PE=1 SV=3	sp|P25444|RS2_MOUSE 40S ribosomal protein S2 OS=Mus musculus OX=10090 GN=Rps2 PE=1 SV=3	58967890	62797470	74995930	68161850	39401640	41548930	97817390	66781330	106981400	54347060	99368920	95553170	60223120	69337800	31956940	58676420	108979800	55710900	85811330	12566260	55662170	129678600	92033080	71582900	7877891	27057000	125234800	107102700	107386700	9041702	34993640	96273480	112400200	12199870	40518350	117553700	72618580	76309290
P25446	TNR6_MOUSE Tumor necrosis factor receptor superfamily member 6 OS=Mus musculus OX=10090 GN=Fas PE=1 SV=2	Fas	sp|P25446|TNR6_MOUSE Tumor necrosis factor receptor superfamily member 6 OS=Mus musculus OX=10090 GN=Fas PE=1 SV=2	sp|P25446|TNR6_MOUSE Tumor necrosis factor receptor superfamily member 6 OS=Mus musculus OX=10090 GN=Fas PE=1 SV=2	381588	1198429	1206714	1856828	974872	936375	713813	1164158	931566	1725872	1491380	2034541	940387	2075332	919773	965381	1815824	997329	947838	620421	1563258	2020618	1129512	1615664	777192	767073	2156703	2913795	1661833	471764	1554685	2031023	4004406	963194	879628	1240190	2279477	1617615
P25688	URIC_MOUSE Uricase OS=Mus musculus OX=10090 GN=Uox PE=1 SV=2	Uox	sp|P25688|URIC_MOUSE Uricase OS=Mus musculus OX=10090 GN=Uox PE=1 SV=2	sp|P25688|URIC_MOUSE Uricase OS=Mus musculus OX=10090 GN=Uox PE=1 SV=2	33999100000	43737490000	44605780000	38858340000	34820260000	43276810000	48045530000	50841100000	43811510000	45363330000	51577750000	58560250000	43828440000	30266670000	40878330000	41620700000	44349310000	37558310000	42735500000	19475810000	43853090000	40335910000	40542290000	37849330000	24939120000	33946510000	42368190000	40700530000	36908650000	27773660000	36445470000	33298500000	48274390000	21912240000	38680490000	35247140000	36770160000	33291120000
P25911	LYN_MOUSE Tyrosine-protein kinase Lyn OS=Mus musculus OX=10090 GN=Lyn PE=1 SV=4	Lyn	sp|P25911|LYN_MOUSE Tyrosine-protein kinase Lyn OS=Mus musculus OX=10090 GN=Lyn PE=1 SV=4	sp|P25911|LYN_MOUSE Tyrosine-protein kinase Lyn OS=Mus musculus OX=10090 GN=Lyn PE=1 SV=4	21976310	23148660	40204070	35794820	18366450	25280370	32622980	32480660	23635050	25485180	31489210	43587870	39403070	37300400	20695000	25912300	38093600	25322650	31533600	17643620	28787860	44296890	33633130	36656280	17453220	23204560	55247780	54707890	42399460	23205250	33512300	41775310	60995510	26727510	32137730	39968900	40309970	57424360
P26039	TLN1_MOUSE Talin-1 OS=Mus musculus OX=10090 GN=Tln1 PE=1 SV=2	Tln1	sp|P26039|TLN1_MOUSE Talin-1 OS=Mus musculus OX=10090 GN=Tln1 PE=1 SV=2	sp|P26039|TLN1_MOUSE Talin-1 OS=Mus musculus OX=10090 GN=Tln1 PE=1 SV=2	103872500	62487210	126174900	84734830	88200450	93540920	100388600	88315670	62708110	139795000	75385090	127476600	122037600	55492110	106389200	61390980	100948900	83971770	83282940	86021220	53577790	96116740	84895000	57638490	50134220	73351800	146901300	118581700	86536650	62834510	73508380	94531570	94691860	76019860	96561320	82987930	91124020	102081600
P26040	EZRI_MOUSE Ezrin OS=Mus musculus OX=10090 GN=Ezr PE=1 SV=3	Ezr	sp|P26040|EZRI_MOUSE Ezrin OS=Mus musculus OX=10090 GN=Ezr PE=1 SV=3	sp|P26040|EZRI_MOUSE Ezrin OS=Mus musculus OX=10090 GN=Ezr PE=1 SV=3	2742138	861073	2099655	1124605	1910871	741572	1032759	2600827	1006503	705890	538611	1772700	1953399	556121	794603	564414	1009210	807232	1586285	46204860	817431	1844030	717827	624795	454439	545197	2997693	1418099	725995	665353	837292	1144541	1038352	803211	824020	1331241	456670	1973625
P26041	MOES_MOUSE Moesin OS=Mus musculus OX=10090 GN=Msn PE=1 SV=3	Msn	sp|P26041|MOES_MOUSE Moesin OS=Mus musculus OX=10090 GN=Msn PE=1 SV=3	sp|P26041|MOES_MOUSE Moesin OS=Mus musculus OX=10090 GN=Msn PE=1 SV=3	70098290	79184060	216558000	155281000	61212550	114944400	155075200	122416800	101548800	104626100	81690020	135208000	177817400	125447300	92382050	61664570	143172600	94024980	103128600	133104100	71252620	146016500	110919400	93640490	24322880	51290480	239688000	163925400	108555600	53624700	109320800	127067500	119796900	87892070	88540820	162380900	112017300	211483400
P26043	RADI_MOUSE Radixin OS=Mus musculus OX=10090 GN=Rdx PE=1 SV=3	Rdx	sp|P26043|RADI_MOUSE Radixin OS=Mus musculus OX=10090 GN=Rdx PE=1 SV=3	sp|P26043|RADI_MOUSE Radixin OS=Mus musculus OX=10090 GN=Rdx PE=1 SV=3	82283680	63562530	74122130	76454710	54713780	90127600	79522550	81895490	75646270	57128540	50986270	99075210	85487270	44652240	86549190	51334760	82309620	87462530	89478920	88123980	50191340	83309830	63094580	71874370	41172690	67537360	70108060	82737460	78227370	43501290	55059090	65551720	97187480	56370810	46711680	62361030	74330360	54123340
P26150	3BHS3_MOUSE 3 beta-hydroxysteroid dehydrogenase/Delta 5-->4-isomerase type 3 OS=Mus musculus OX=10090 GN=Hsd3b3 PE=1 SV=3	Hsd3b3	sp|P26150|3BHS3_MOUSE 3 beta-hydroxysteroid dehydrogenase/Delta 5-->4-isomerase type 3 OS=Mus musculus OX=10090 GN=Hsd3b3 PE=1 SV=3	sp|P26150|3BHS3_MOUSE 3 beta-hydroxysteroid dehydrogenase/Delta 5-->4-isomerase type 3 OS=Mus musculus OX=10090 GN=Hsd3b3 PE=1 SV=3	155828900	203475300	240773100	205943200	142571500	186797800	219992700	217047800	193309000	152573900	210486900	198565200	171146100	131621100	181730200	198765000	271805000	139317500	224606500	105756800	191332100	302785000	216518500	214822600	133359500	157833200	411882000	229736900	176794200	142496700	124359200	273456800	312916200	214326900	176710000	300255800	109921400	150740900
P26231	CTNA1_MOUSE Catenin alpha-1 OS=Mus musculus OX=10090 GN=Ctnna1 PE=1 SV=1	Ctnna1	sp|P26231|CTNA1_MOUSE Catenin alpha-1 OS=Mus musculus OX=10090 GN=Ctnna1 PE=1 SV=1	sp|P26231|CTNA1_MOUSE Catenin alpha-1 OS=Mus musculus OX=10090 GN=Ctnna1 PE=1 SV=1	122589000	68815470	92593270	77724210	64635700	75647930	86082350	75018410	60993430	113506100	84269910	137432400	83037510	84221070	79852750	64236620	104438800	66715150	77760920	174024400	73363400	116621600	110299400	85493000	72795720	97178840	155215200	138738100	136041000	82613190	110188500	137866800	169889500	114008000	121445900	103794500	121110600	110340100
P26262	KLKB1_MOUSE Plasma kallikrein OS=Mus musculus OX=10090 GN=Klkb1 PE=1 SV=2	Klkb1	sp|P26262|KLKB1_MOUSE Plasma kallikrein OS=Mus musculus OX=10090 GN=Klkb1 PE=1 SV=2	sp|P26262|KLKB1_MOUSE Plasma kallikrein OS=Mus musculus OX=10090 GN=Klkb1 PE=1 SV=2	1788666	4700034	1894678	1612087	1458207	1483562	1534704	914726	1373235	1417150	3089463	2350457	1423417	3766850	2351735	4072149	1637004	1380532	1657174	487184	7047164	3609911	1711158	4296387	1074902	1451709	2579773	1273516	1278861	915973	2873891	2045925	8592579	937620	1879825	2100365	2168161	1330462
P26443	DHE3_MOUSE Glutamate dehydrogenase 1, mitochondrial OS=Mus musculus OX=10090 GN=Glud1 PE=1 SV=1	Glud1	sp|P26443|DHE3_MOUSE Glutamate dehydrogenase 1, mitochondrial OS=Mus musculus OX=10090 GN=Glud1 PE=1 SV=1	sp|P26443|DHE3_MOUSE Glutamate dehydrogenase 1, mitochondrial OS=Mus musculus OX=10090 GN=Glud1 PE=1 SV=1	13311690000	8795752000	5604367000	4056268000	16842560000	8907575000	6884970000	9991352000	5821612000	15327570000	10099130000	8012368000	6270570000	2008535000	12848330000	7174176000	7375722000	6222834000	4801020000	7310449000	4647018000	5393014000	2582304000	2066508000	3268209000	3423231000	4150261000	2875690000	1482982000	6046296000	6512080000	3553992000	2959973000	3664916000	3681605000	2432523000	2863070000	1292698000
P26450	P85A_MOUSE Phosphatidylinositol 3-kinase regulatory subunit alpha OS=Mus musculus OX=10090 GN=Pik3r1 PE=1 SV=2	Pik3r1	sp|P26450|P85A_MOUSE Phosphatidylinositol 3-kinase regulatory subunit alpha OS=Mus musculus OX=10090 GN=Pik3r1 PE=1 SV=2	sp|P26450|P85A_MOUSE Phosphatidylinositol 3-kinase regulatory subunit alpha OS=Mus musculus OX=10090 GN=Pik3r1 PE=1 SV=2	114919	148889	262847	265394	192375	120185	311998	292146	217909	241882	277073	355049	111793	196998	92410.2	135182	236110	129637	210193	70716.3	310972	231716	453061	138795	127234	135462	725791	400514	306872	34436.8	149338	275940	415585	196032	251880	229953	462710	201743
P26516	PSMD7_MOUSE 26S proteasome non-ATPase regulatory subunit 7 OS=Mus musculus OX=10090 GN=Psmd7 PE=1 SV=2	Psmd7	sp|P26516|PSMD7_MOUSE 26S proteasome non-ATPase regulatory subunit 7 OS=Mus musculus OX=10090 GN=Psmd7 PE=1 SV=2	sp|P26516|PSMD7_MOUSE 26S proteasome non-ATPase regulatory subunit 7 OS=Mus musculus OX=10090 GN=Psmd7 PE=1 SV=2	6763843	6436108	5713719	4084441	5059902	3782374	5708527	6235932	6352318	7302667	6789699	4876026	5000042	3304817	4014888	7100669	4248003	3638498	7549783	3171885	3249710	7048023	6028457	3741529	3862206	2398812	7965677	4119114	6173950	2189983	3585079	6067490	7770118	2067910	6004248	4561570	4936346	4030347
P26638	SYSC_MOUSE Serine--tRNA ligase, cytoplasmic OS=Mus musculus OX=10090 GN=Sars PE=1 SV=3	Sars	sp|P26638|SYSC_MOUSE Serine--tRNA ligase, cytoplasmic OS=Mus musculus OX=10090 GN=Sars PE=1 SV=3	sp|P26638|SYSC_MOUSE Serine--tRNA ligase, cytoplasmic OS=Mus musculus OX=10090 GN=Sars PE=1 SV=3	1924824	2027870	1735434	1063442	1642239	1473233	2150522	1918218	1233748	1449492	2467246	5074662	1569979	820614	2009082	2180501	3035783	904663	1764323	899638	1833292	2500127	759732	753172	1110889	1213894	1718433	1858186	995388	1376036	2791996	1996922	3687718	929352	1186377	761396	669309	708713
P26645	MARCS_MOUSE Myristoylated alanine-rich C-kinase substrate OS=Mus musculus OX=10090 GN=Marcks PE=1 SV=2	Marcks	sp|P26645|MARCS_MOUSE Myristoylated alanine-rich C-kinase substrate OS=Mus musculus OX=10090 GN=Marcks PE=1 SV=2	sp|P26645|MARCS_MOUSE Myristoylated alanine-rich C-kinase substrate OS=Mus musculus OX=10090 GN=Marcks PE=1 SV=2	3439567	5345528	5797240	3029606	2860619	3123152	4302325	3446489	1986391	4696398	6944919	5494441	5404686	2817089	3491708	2922863	5583705	1793121	3052622	454821	2564988	3428354	2530092	2059886	552988	1316645	4362550	6129379	1901386	931470	3014724	3418968	4138134	1794145	2302738	2379028	5112647	5604096
P26928	HGFL_MOUSE Hepatocyte growth factor-like protein OS=Mus musculus OX=10090 GN=Mst1 PE=2 SV=2	Mst1	sp|P26928|HGFL_MOUSE Hepatocyte growth factor-like protein OS=Mus musculus OX=10090 GN=Mst1 PE=2 SV=2	sp|P26928|HGFL_MOUSE Hepatocyte growth factor-like protein OS=Mus musculus OX=10090 GN=Mst1 PE=2 SV=2	411736	1110926	1607745	1748819	551147	1212034	1271391	2476169	2661556	375224	792717	939470	1945625	1456812	694125	1429359	560978	1454172	2540145	544835	1524244	1645268	2823625	681170	468928	846810	2317406	1131052	3205435	458064	176012	1352543	2732323	793886	779553	2819279	1062695	1398435
P27046	MA2A1_MOUSE Alpha-mannosidase 2 OS=Mus musculus OX=10090 GN=Man2a1 PE=1 SV=2	Man2a1	sp|P27046|MA2A1_MOUSE Alpha-mannosidase 2 OS=Mus musculus OX=10090 GN=Man2a1 PE=1 SV=2	sp|P27046|MA2A1_MOUSE Alpha-mannosidase 2 OS=Mus musculus OX=10090 GN=Man2a1 PE=1 SV=2	159155400	567991800	967940000	856320300	213623500	400666700	854577100	1130733000	497616400	114721700	591529600	864414000	791425100	883537900	366382200	546582400	939153000	742597200	692051500	231970000	742631400	1226326000	1120224000	935522200	272876700	1041498000	2343173000	1816552000	1025994000	246486600	402500900	1201277000	1384848000	568725700	803481500	1621824000	1049697000	1431280000
P27546	MAP4_MOUSE Microtubule-associated protein 4 OS=Mus musculus OX=10090 GN=Map4 PE=1 SV=3	Map4	sp|P27546|MAP4_MOUSE Microtubule-associated protein 4 OS=Mus musculus OX=10090 GN=Map4 PE=1 SV=3	sp|P27546|MAP4_MOUSE Microtubule-associated protein 4 OS=Mus musculus OX=10090 GN=Map4 PE=1 SV=3	5849792	5354145	3032871	3954961	3897041	2653701	4823539	1931677	2547295	4841415	4817289	3993337	3002100	1378426	5736141	4494090	4596421	5950328	4816416	1950641	1877727	3052709	2396220	3539781	1585806	1850112	2465374	2489403	2640332	2510029	1447874	2548862	3647209	2041455	2650704	1338643	2242071	777216
P27601	GNA13_MOUSE Guanine nucleotide-binding protein subunit alpha-13 OS=Mus musculus OX=10090 GN=Gna13 PE=1 SV=1	Gna13	sp|P27601|GNA13_MOUSE Guanine nucleotide-binding protein subunit alpha-13 OS=Mus musculus OX=10090 GN=Gna13 PE=1 SV=1	sp|P27601|GNA13_MOUSE Guanine nucleotide-binding protein subunit alpha-13 OS=Mus musculus OX=10090 GN=Gna13 PE=1 SV=1	210394900	253642800	280574800	238650200	175314300	205199700	274355400	274203600	258735000	213637100	252990800	308391500	280605600	226806600	180891300	239479100	325039500	185727800	207681200	256276400	204236300	355091800	313233200	253021900	132843000	178551800	446570400	357226100	361495300	200127900	246705900	423211400	382817300	214927800	277630500	315435100	289413800	268716100
P27612	PLAP_MOUSE Phospholipase A-2-activating protein OS=Mus musculus OX=10090 GN=Plaa PE=1 SV=4	Plaa	sp|P27612|PLAP_MOUSE Phospholipase A-2-activating protein OS=Mus musculus OX=10090 GN=Plaa PE=1 SV=4	sp|P27612|PLAP_MOUSE Phospholipase A-2-activating protein OS=Mus musculus OX=10090 GN=Plaa PE=1 SV=4	4289891	2792192	4117915	3506976	3311936	3446512	2866810	4127158	1474355	4251194	2304914	5099036	3080622	3577627	4013641	3568435	3302648	2836592	2236799	2164957	2507930	3474457	2297766	2626177	2340833	2804845	3444416	5990327	3255574	1919897	2394607	2872516	3451817	2393267	3274053	3041244	3621185	2599483
P27656	LIPC_MOUSE Hepatic triacylglycerol lipase OS=Mus musculus OX=10090 GN=Lipc PE=2 SV=2	Lipc	sp|P27656|LIPC_MOUSE Hepatic triacylglycerol lipase OS=Mus musculus OX=10090 GN=Lipc PE=2 SV=2	sp|P27656|LIPC_MOUSE Hepatic triacylglycerol lipase OS=Mus musculus OX=10090 GN=Lipc PE=2 SV=2	2054876	2476881	1801518	1090959	3989976	4902593	5451290	6205136	4066739	6216169	3211029	1202553	1791740	585813	4060751	5760895	3340968	4165723	6263751	276162	763389	1225564	864262	1524197	249132	280040	910279	566294	934715	263497	610491	334855	1384955	285618	547228	392389	611591	429402
P27659	RL3_MOUSE 60S ribosomal protein L3 OS=Mus musculus OX=10090 GN=Rpl3 PE=1 SV=3	Rpl3	sp|P27659|RL3_MOUSE 60S ribosomal protein L3 OS=Mus musculus OX=10090 GN=Rpl3 PE=1 SV=3	sp|P27659|RL3_MOUSE 60S ribosomal protein L3 OS=Mus musculus OX=10090 GN=Rpl3 PE=1 SV=3	166571800	449071100	741243300	690022700	182503200	345779500	625310700	805403500	690539600	138277600	540592600	642272400	543514800	709583700	238496200	417668300	743254600	641430900	626776200	114745400	633879500	1195501000	1012562000	838606500	113185600	411582700	949056500	795692700	847565100	128112000	335899100	770935800	1345951000	214215800	544109500	847006900	723395800	714062000
P27661	H2AX_MOUSE Histone H2AX OS=Mus musculus OX=10090 GN=H2afx PE=1 SV=2	H2afx	sp|P27661|H2AX_MOUSE Histone H2AX OS=Mus musculus OX=10090 GN=H2afx PE=1 SV=2	sp|P27661|H2AX_MOUSE Histone H2AX OS=Mus musculus OX=10090 GN=H2afx PE=1 SV=2	356384600	119746400	269403800	57017680	187360200	117272900	174645300	144341600	191719900	195119800	166051400	196899600	238432300	54668260	101140600	96996880	194922400	70613450	151849300	268896100	49008930	192834600	94560120	53706660	32284960	79774050	130514500	125909800	134266800	67649870	46437940	158813600	99388120	37470500	86807290	81986360	91557970	55128530
P27773	PDIA3_MOUSE Protein disulfide-isomerase A3 OS=Mus musculus OX=10090 GN=Pdia3 PE=1 SV=2	Pdia3	sp|P27773|PDIA3_MOUSE Protein disulfide-isomerase A3 OS=Mus musculus OX=10090 GN=Pdia3 PE=1 SV=2	sp|P27773|PDIA3_MOUSE Protein disulfide-isomerase A3 OS=Mus musculus OX=10090 GN=Pdia3 PE=1 SV=2	1567290000	3228401000	4654606000	3188377000	1818763000	3036666000	4512924000	4623993000	4270633000	1978301000	3435076000	4523133000	4067873000	2531865000	2208799000	3202846000	4393454000	3554608000	3881178000	919853000	2278924000	3886969000	2924753000	2881974000	525926800	1349663000	3384788000	3359028000	3087194000	830471800	2136127000	3436374000	3259050000	1091738000	2535782000	2327297000	2256258000	3009277000
P27786	CP17A_MOUSE Steroid 17-alpha-hydroxylase/17,20 lyase OS=Mus musculus OX=10090 GN=Cyp17a1 PE=1 SV=1	Cyp17a1	sp|P27786|CP17A_MOUSE Steroid 17-alpha-hydroxylase/17,20 lyase OS=Mus musculus OX=10090 GN=Cyp17a1 PE=1 SV=1	sp|P27786|CP17A_MOUSE Steroid 17-alpha-hydroxylase/17,20 lyase OS=Mus musculus OX=10090 GN=Cyp17a1 PE=1 SV=1	153137500	220209700	128521700	471744700	140440500	181774900	160457600	432136600	208916200	107696500	240310900	209296400	207592300	161554000	162463700	98778250	82021200	258518000	415701000	73790910	256452000	276725400	615960300	387444200	182870300	446298900	150529900	351802500	249533100	187300200	127427700	217314900	370892600	126285800	166905700	176277400	519419200	136750600
P27808	MGAT1_MOUSE Alpha-1,3-mannosyl-glycoprotein 2-beta-N-acetylglucosaminyltransferase OS=Mus musculus OX=10090 GN=Mgat1 PE=1 SV=1	Mgat1	sp|P27808|MGAT1_MOUSE Alpha-1,3-mannosyl-glycoprotein 2-beta-N-acetylglucosaminyltransferase OS=Mus musculus OX=10090 GN=Mgat1 PE=1 SV=1	sp|P27808|MGAT1_MOUSE Alpha-1,3-mannosyl-glycoprotein 2-beta-N-acetylglucosaminyltransferase OS=Mus musculus OX=10090 GN=Mgat1 PE=1 SV=1	7299693	23179380	40183630	40179800	8436128	16603950	34025840	47512550	21069980	5528510	25361240	34184090	38066800	43841870	12536060	22928970	33523590	36004080	27327940	11167150	25925990	60372340	48105920	48931820	8918105	40923050	100007900	74600250	39934080	10213290	16250310	51962450	61979930	19667530	29911470	69418540	47291360	62346240
P28063	PSB8_MOUSE Proteasome subunit beta type-8 OS=Mus musculus OX=10090 GN=Psmb8 PE=1 SV=2	Psmb8	sp|P28063|PSB8_MOUSE Proteasome subunit beta type-8 OS=Mus musculus OX=10090 GN=Psmb8 PE=1 SV=2	sp|P28063|PSB8_MOUSE Proteasome subunit beta type-8 OS=Mus musculus OX=10090 GN=Psmb8 PE=1 SV=2	7509653	7216957	22938410	16142480	7761531	8256296	10536900	10840060	19304320	3242322	9258667	18736850	21217350	12199070	5274709	12082830	17521190	9326997	14579800	2016020	5389486	15828200	5904187	7309020	2947850	2372785	6243454	10904050	5902243	1662939	7175436	11773860	9222284	1802418	5510462	6334301	6833210	7072728
P28230	CXB1_MOUSE Gap junction beta-1 protein OS=Mus musculus OX=10090 GN=Gjb1 PE=1 SV=3	Gjb1	sp|P28230|CXB1_MOUSE Gap junction beta-1 protein OS=Mus musculus OX=10090 GN=Gjb1 PE=1 SV=3	sp|P28230|CXB1_MOUSE Gap junction beta-1 protein OS=Mus musculus OX=10090 GN=Gjb1 PE=1 SV=3	84109810	44911600	42806650	51662030	58695300	65203290	52575590	55952740	82563500	71811660	91470350	31322900	48913990	54406830	79967070	82531510	34785710	54276820	93599480	15945570	17635430	45413560	37262860	44565640	27521980	12181200	17001930	51336900	81149890	25911760	53407940	38257450	105368300	41980010	26354630	35814350	34351440	21944260
P28271	ACOC_MOUSE Cytoplasmic aconitate hydratase OS=Mus musculus OX=10090 GN=Aco1 PE=1 SV=3	Aco1	sp|P28271|ACOC_MOUSE Cytoplasmic aconitate hydratase OS=Mus musculus OX=10090 GN=Aco1 PE=1 SV=3	sp|P28271|ACOC_MOUSE Cytoplasmic aconitate hydratase OS=Mus musculus OX=10090 GN=Aco1 PE=1 SV=3	300085100	245064500	233814100	194015300	262235000	233045200	247023000	275825700	330455900	343216600	323587400	352259400	257691100	152828100	253383400	362762000	283106000	189632200	391809400	120965300	188287000	382786200	220952700	188775100	145596100	135872600	185726600	194220400	268658200	154047800	170535700	271940600	338148200	119722200	223083700	167055700	193033700	125299400
P28293	CATG_MOUSE Cathepsin G OS=Mus musculus OX=10090 GN=Ctsg PE=1 SV=2	Ctsg	sp|P28293|CATG_MOUSE Cathepsin G OS=Mus musculus OX=10090 GN=Ctsg PE=1 SV=2	sp|P28293|CATG_MOUSE Cathepsin G OS=Mus musculus OX=10090 GN=Ctsg PE=1 SV=2	294140	861143	566486	194716	665228	426329	684856	449147	233724	628296	835972	1190688	617611	308354	444297	352155	1662652	632297	354427	203592	449995	334277	381642	123914	317672	513134	791937	3250160	245487	189946	217977	405209	577991	493629	82881.1	295775	723576	930496
P28352	APEX1_MOUSE DNA-(apurinic or apyrimidinic site) lyase OS=Mus musculus OX=10090 GN=Apex1 PE=1 SV=2	Apex1	sp|P28352|APEX1_MOUSE DNA-(apurinic or apyrimidinic site) lyase OS=Mus musculus OX=10090 GN=Apex1 PE=1 SV=2	sp|P28352|APEX1_MOUSE DNA-(apurinic or apyrimidinic site) lyase OS=Mus musculus OX=10090 GN=Apex1 PE=1 SV=2	2300492	2919129	5428009	2096167	1350872	2289873	3074405	1311614	2446378	1869220	3026797	4346701	6906563	4467229	2530553	2764618	3163872	2389880	4210497	2194547	2035940	1744598	1859645	2450472	1136030	859892	2209270	3376570	2268679	825928	3661839	2452513	6725018	1035444	935874	1345579	2750877	2907052
P28474	ADHX_MOUSE Alcohol dehydrogenase class-3 OS=Mus musculus OX=10090 GN=Adh5 PE=1 SV=3	Adh5	sp|P28474|ADHX_MOUSE Alcohol dehydrogenase class-3 OS=Mus musculus OX=10090 GN=Adh5 PE=1 SV=3	sp|P28474|ADHX_MOUSE Alcohol dehydrogenase class-3 OS=Mus musculus OX=10090 GN=Adh5 PE=1 SV=3	235512500	177166900	208631000	96088570	225085900	159082700	208456500	186020500	197263500	337619200	278143700	228501300	192422600	82116720	188153100	244764400	216669700	138443200	248481000	60515020	93822960	189444100	102655000	92336320	69430810	46931090	77798240	93832640	116655200	70038050	87081260	120656700	173304800	41263840	77736330	72560160	93286350	47213590
P28650	PURA1_MOUSE Adenylosuccinate synthetase isozyme 1 OS=Mus musculus OX=10090 GN=Adssl1 PE=1 SV=2	Adssl1	sp|P28650|PURA1_MOUSE Adenylosuccinate synthetase isozyme 1 OS=Mus musculus OX=10090 GN=Adssl1 PE=1 SV=2	sp|P28650|PURA1_MOUSE Adenylosuccinate synthetase isozyme 1 OS=Mus musculus OX=10090 GN=Adssl1 PE=1 SV=2	271618	440664	416772	471486	347091	512034	1107989	829938	1263290	172426	1525181	1984915	523112	868369	518902	648090	616830	396739	517046	283985	697001	620373	1608422	870214	260468	966930	896946	511916	1456702	188910	192629	1181285	2186886	348487	796968	815975	1121424	60097.8
P28653	PGS1_MOUSE Biglycan OS=Mus musculus OX=10090 GN=Bgn PE=1 SV=1	Bgn	sp|P28653|PGS1_MOUSE Biglycan OS=Mus musculus OX=10090 GN=Bgn PE=1 SV=1	sp|P28653|PGS1_MOUSE Biglycan OS=Mus musculus OX=10090 GN=Bgn PE=1 SV=1	3335017	2496007	5010539	2995705	4258192	5701806	2784511	4796315	4096783	5056825	3933568	3379485	3226615	2910805	5045101	2692320	3899917	4723251	6050752	1574986	1419377	2855999	2605970	2475457	1437346	2292569	3586689	2850282	2028017	881229	1972053	2532081	3067907	962600	1854774	1118995	1915204	1438971
P28654	PGS2_MOUSE Decorin OS=Mus musculus OX=10090 GN=Dcn PE=1 SV=1	Dcn	sp|P28654|PGS2_MOUSE Decorin OS=Mus musculus OX=10090 GN=Dcn PE=1 SV=1	sp|P28654|PGS2_MOUSE Decorin OS=Mus musculus OX=10090 GN=Dcn PE=1 SV=1	5605099	4895101	3272245	1709774	5716895	6188290	5430310	6307242	6758135	7692684	5053534	2131086	5573568	765891	4853049	8371806	3271530	6894335	8910226	1076422	1510151	1996541	2839765	1329253	1038925	2150290	3560373	2331143	1113811	1320502	1610413	1206353	1536469	247573	2843087	956656	1660208	1376497
P28656	NP1L1_MOUSE Nucleosome assembly protein 1-like 1 OS=Mus musculus OX=10090 GN=Nap1l1 PE=1 SV=2	Nap1l1	sp|P28656|NP1L1_MOUSE Nucleosome assembly protein 1-like 1 OS=Mus musculus OX=10090 GN=Nap1l1 PE=1 SV=2	sp|P28656|NP1L1_MOUSE Nucleosome assembly protein 1-like 1 OS=Mus musculus OX=10090 GN=Nap1l1 PE=1 SV=2	1449169	1118744	2119165	3831504	1847246	2688710	743627	5646726	3757159	3741524	3322097	2964835	1619113	1833979	924183	3345888	3349409	1338131	5252874	1301546	1951461	2669390	2053863	3587410	1729053	602737	2136657	5259072	1846855	1778522	2467869	1667475	3790897	2673570	3183829	356016	2895292	4151838
P28660	NCKP1_MOUSE Nck-associated protein 1 OS=Mus musculus OX=10090 GN=Nckap1 PE=1 SV=2	Nckap1	sp|P28660|NCKP1_MOUSE Nck-associated protein 1 OS=Mus musculus OX=10090 GN=Nckap1 PE=1 SV=2	sp|P28660|NCKP1_MOUSE Nck-associated protein 1 OS=Mus musculus OX=10090 GN=Nckap1 PE=1 SV=2	3155068	2824053	5900804	4556990	2519768	4780753	4031541	5992919	3310450	1778379	3043619	5919688	6651621	2555046	4137826	2385614	3898933	4422910	6077824	4015651	3222801	6802548	5405006	2394226	3409873	6988672	11576850	9384037	8151960	2806767	3044441	5557845	5588698	4258795	6173231	7674293	6837623	5661252
P28665	MUG1_MOUSE Murinoglobulin-1 OS=Mus musculus OX=10090 GN=Mug1 PE=1 SV=3	Mug1	sp|P28665|MUG1_MOUSE Murinoglobulin-1 OS=Mus musculus OX=10090 GN=Mug1 PE=1 SV=3	sp|P28665|MUG1_MOUSE Murinoglobulin-1 OS=Mus musculus OX=10090 GN=Mug1 PE=1 SV=3	67716530	131009200	193241900	148621900	83239340	128634000	274088600	257420200	180212100	126916100	155024800	167044000	148254900	194726400	144527400	257567200	178335500	242514100	176573800	58259540	199699000	263002600	204738300	223131200	70531940	110504000	382537500	235309400	313458800	59490480	151401400	222814400	362511200	185890600	203732000	304260000	187721800	246288500
P28666	MUG2_MOUSE Murinoglobulin-2 OS=Mus musculus OX=10090 GN=Mug2 PE=1 SV=2	Mug2	sp|P28666|MUG2_MOUSE Murinoglobulin-2 OS=Mus musculus OX=10090 GN=Mug2 PE=1 SV=2	sp|P28666|MUG2_MOUSE Murinoglobulin-2 OS=Mus musculus OX=10090 GN=Mug2 PE=1 SV=2	26952920	33346870	81920580	30196340	32345960	47596720	101692300	101373900	80885070	35212790	29523390	51033760	58108200	40272630	36574830	60486590	69063440	60875350	65902300	13437610	32481050	70626170	63820300	38587720	11467610	24355350	133775700	93289320	79400230	11815590	38493270	74576500	69078530	44175760	73430770	95548660	44895080	69634880
P28667	MRP_MOUSE MARCKS-related protein OS=Mus musculus OX=10090 GN=Marcksl1 PE=1 SV=2	Marcksl1	sp|P28667|MRP_MOUSE MARCKS-related protein OS=Mus musculus OX=10090 GN=Marcksl1 PE=1 SV=2	sp|P28667|MRP_MOUSE MARCKS-related protein OS=Mus musculus OX=10090 GN=Marcksl1 PE=1 SV=2	225023	376800	191949	140268	224210	248893	277544	102893	21552.7	214717	563329	234345	324100	138040	280729	200144	430509	80353.4	146581	26001.3	61181.8	145154	107066	67436.4	15489.7	25025.6	53276.5	192693	75128.2	56540.9	274035	49786.2	94968.9	49891.3	82105.8	80183.5	205871	179101
P28825	MEP1A_MOUSE Meprin A subunit alpha OS=Mus musculus OX=10090 GN=Mep1a PE=1 SV=4	Mep1a	sp|P28825|MEP1A_MOUSE Meprin A subunit alpha OS=Mus musculus OX=10090 GN=Mep1a PE=1 SV=4	sp|P28825|MEP1A_MOUSE Meprin A subunit alpha OS=Mus musculus OX=10090 GN=Mep1a PE=1 SV=4	4716613	888406	1003697	644530	749534	746273	601884	736351	506258	812845	1353634	765768	822524	349855	603822	749508	700817	6682739	642683	84814130	378647	752399	755048	742513	1030581	849006	840732	1228224	405535	780456	498613	643058	891889	819037	793139	609017	400612	636096
P28843	DPP4_MOUSE Dipeptidyl peptidase 4 OS=Mus musculus OX=10090 GN=Dpp4 PE=1 SV=3	Dpp4	sp|P28843|DPP4_MOUSE Dipeptidyl peptidase 4 OS=Mus musculus OX=10090 GN=Dpp4 PE=1 SV=3	sp|P28843|DPP4_MOUSE Dipeptidyl peptidase 4 OS=Mus musculus OX=10090 GN=Dpp4 PE=1 SV=3	698177000	591649100	672132000	584635000	580388200	594771500	559297000	794294400	626396400	722984400	783152800	738476500	588484900	498170700	571094700	700551200	594665700	579383500	792814900	679564300	693204400	931052400	808937800	593528100	461745800	611410800	1095653000	781998000	868459000	398516000	625722800	739968300	1039462000	623651400	817647600	765774500	633057400	738131200
P29341	PABP1_MOUSE Polyadenylate-binding protein 1 OS=Mus musculus OX=10090 GN=Pabpc1 PE=1 SV=2	Pabpc1	sp|P29341|PABP1_MOUSE Polyadenylate-binding protein 1 OS=Mus musculus OX=10090 GN=Pabpc1 PE=1 SV=2	sp|P29341|PABP1_MOUSE Polyadenylate-binding protein 1 OS=Mus musculus OX=10090 GN=Pabpc1 PE=1 SV=2	40992670	39182830	49786830	59806540	36800650	32282340	90620860	67940020	60728480	30417450	67502660	99354630	49117310	36292700	50279700	48113000	111099600	41328900	55481870	15102690	55101120	46078860	39977510	51311880	13793880	17693770	35330370	36050200	40231710	14321030	32088720	46711060	59821380	17844540	31266590	38237580	32839320	22495770
P29351	PTN6_MOUSE Tyrosine-protein phosphatase non-receptor type 6 OS=Mus musculus OX=10090 GN=Ptpn6 PE=1 SV=2	Ptpn6	sp|P29351|PTN6_MOUSE Tyrosine-protein phosphatase non-receptor type 6 OS=Mus musculus OX=10090 GN=Ptpn6 PE=1 SV=2	sp|P29351|PTN6_MOUSE Tyrosine-protein phosphatase non-receptor type 6 OS=Mus musculus OX=10090 GN=Ptpn6 PE=1 SV=2	1393891	1228628	4002802	2033549	999459	818310	1432539	1650027	1430490	1332039	1338146	2050565	3339351	1529898	1090269	572365	2057780	1320774	1147396	862712	1582244	2449001	1628078	1324365	1383373	1142249	2536155	1790117	1843283	873551	1550963	1631297	2189800	2055675	2077685	1702827	1338587	1935368
P29387	GBB4_MOUSE Guanine nucleotide-binding protein subunit beta-4 OS=Mus musculus OX=10090 GN=Gnb4 PE=1 SV=4	Gnb4	sp|P29387|GBB4_MOUSE Guanine nucleotide-binding protein subunit beta-4 OS=Mus musculus OX=10090 GN=Gnb4 PE=1 SV=4	sp|P29387|GBB4_MOUSE Guanine nucleotide-binding protein subunit beta-4 OS=Mus musculus OX=10090 GN=Gnb4 PE=1 SV=4	494677	322460	811085	370694	210865	427326	340529	281970	163830	376004	330685	458282	471624	608224	429892	321083	801063	329486	201604	529183	712192	768228	879141	379940	408509	486376	1725963	1083280	512358	310108	553156	908215	1099050	791725	591466	625033	824763	1026496
P29391	FRIL1_MOUSE Ferritin light chain 1 OS=Mus musculus OX=10090 GN=Ftl1 PE=1 SV=2	Ftl1	sp|P29391|FRIL1_MOUSE Ferritin light chain 1 OS=Mus musculus OX=10090 GN=Ftl1 PE=1 SV=2	sp|P29391|FRIL1_MOUSE Ferritin light chain 1 OS=Mus musculus OX=10090 GN=Ftl1 PE=1 SV=2	352835400	410144600	816045800	734230300	479106800	537066600	548997800	834742800	598050900	569656900	518017000	1021504000	800456000	757093400	713356700	578399600	889530000	521502700	762725200	404702400	754419800	833356300	1478148000	865378800	1011331000	805842200	1614409000	1426219000	1505590000	683740500	896841900	1105928000	1692810000	1130718000	1227935000	771547200	836539200	993558300
P29416	HEXA_MOUSE Beta-hexosaminidase subunit alpha OS=Mus musculus OX=10090 GN=Hexa PE=1 SV=2	Hexa	sp|P29416|HEXA_MOUSE Beta-hexosaminidase subunit alpha OS=Mus musculus OX=10090 GN=Hexa PE=1 SV=2	sp|P29416|HEXA_MOUSE Beta-hexosaminidase subunit alpha OS=Mus musculus OX=10090 GN=Hexa PE=1 SV=2	41150230	54156930	128794300	119285500	51631920	53228690	71531280	91076610	48388590	41350460	67171520	98214920	82110310	118073700	52511440	51112940	99958290	57762410	54233750	111335500	182392600	168910000	195401100	103661200	217266200	177268900	311935200	235531700	171529100	133330500	110136200	140911900	200541900	221272200	181772900	215984700	230322400	225341100
P29533	VCAM1_MOUSE Vascular cell adhesion protein 1 OS=Mus musculus OX=10090 GN=Vcam1 PE=1 SV=1	Vcam1	sp|P29533|VCAM1_MOUSE Vascular cell adhesion protein 1 OS=Mus musculus OX=10090 GN=Vcam1 PE=1 SV=1	sp|P29533|VCAM1_MOUSE Vascular cell adhesion protein 1 OS=Mus musculus OX=10090 GN=Vcam1 PE=1 SV=1	1291933	2410633	8450312	3951623	2769044	2000963	2812425	4532992	2956358	1711143	3103092	3514408	5031559	3090172	1661681	2640677	3957289	3306011	3578562	2784021	1750239	2589228	3817336	2532396	948977	2942879	10437450	12272030	4427526	679034	2047255	3519486	5806234	2432894	2939788	3048328	5420648	15254690
P29699	FETUA_MOUSE Alpha-2-HS-glycoprotein OS=Mus musculus OX=10090 GN=Ahsg PE=1 SV=1	Ahsg	sp|P29699|FETUA_MOUSE Alpha-2-HS-glycoprotein OS=Mus musculus OX=10090 GN=Ahsg PE=1 SV=1	sp|P29699|FETUA_MOUSE Alpha-2-HS-glycoprotein OS=Mus musculus OX=10090 GN=Ahsg PE=1 SV=1	32416170	60452330	24513660	13536120	41465620	41203260	62342210	56658660	43239240	60541470	79251030	26919740	34433270	18636500	39919920	85855810	36488320	48412290	43277290	3899536	22987040	19453320	31478050	19519820	8668909	10206030	12571240	16697150	19393700	2743542	20431170	19552850	30556100	6747317	12572620	11341210	16198080	10715660
P29758	OAT_MOUSE Ornithine aminotransferase, mitochondrial OS=Mus musculus OX=10090 GN=Oat PE=1 SV=1	Oat	sp|P29758|OAT_MOUSE Ornithine aminotransferase, mitochondrial OS=Mus musculus OX=10090 GN=Oat PE=1 SV=1	sp|P29758|OAT_MOUSE Ornithine aminotransferase, mitochondrial OS=Mus musculus OX=10090 GN=Oat PE=1 SV=1	9975918000	6531271000	6368359000	5183231000	14331830000	9444702000	4369055000	10518520000	3169048000	14745070000	8610967000	10994340000	7762068000	2502283000	12410660000	4422580000	6022007000	5308464000	4035931000	11505570000	8033774000	14069730000	8476358000	3613651000	23617650000	17958840000	9633492000	7634021000	3732162000	6655741000	9167395000	11095770000	6860536000	9193057000	8187634000	6064140000	16907810000	3404894000
P29788	VTNC_MOUSE Vitronectin OS=Mus musculus OX=10090 GN=Vtn PE=1 SV=2	Vtn	sp|P29788|VTNC_MOUSE Vitronectin OS=Mus musculus OX=10090 GN=Vtn PE=1 SV=2	sp|P29788|VTNC_MOUSE Vitronectin OS=Mus musculus OX=10090 GN=Vtn PE=1 SV=2	75372430	78904520	122553700	67238220	138729900	144900500	201944100	165501000	113810100	127245100	113222600	75549410	93448020	89061080	144871900	162453300	181751300	154564900	159466700	22450050	69869690	75686310	84019360	64476010	30357600	57256390	169406700	116179200	83842420	25968930	52462400	81051850	132899900	58843710	72543830	107817200	81132430	108268200
P30115	GSTA3_MOUSE Glutathione S-transferase A3 OS=Mus musculus OX=10090 GN=Gsta3 PE=1 SV=2	Gsta3	sp|P30115|GSTA3_MOUSE Glutathione S-transferase A3 OS=Mus musculus OX=10090 GN=Gsta3 PE=1 SV=2	sp|P30115|GSTA3_MOUSE Glutathione S-transferase A3 OS=Mus musculus OX=10090 GN=Gsta3 PE=1 SV=2	1370325000	1526610000	1503370000	1408896000	1790623000	1530870000	1307850000	1679207000	2523400000	2045051000	1813085000	1322080000	1829743000	927416200	1679735000	1901551000	1311627000	1266941000	2640639000	386814300	688150900	878799100	902139400	1158505000	637854800	594128000	543863400	1032045000	1129869000	525477800	857942800	960061100	1714218000	538848000	828182600	585259300	868787100	633514900
P30204	MSRE_MOUSE Macrophage scavenger receptor types I and II OS=Mus musculus OX=10090 GN=Msr1 PE=1 SV=3	Msr1	sp|P30204|MSRE_MOUSE Macrophage scavenger receptor types I and II OS=Mus musculus OX=10090 GN=Msr1 PE=1 SV=3	sp|P30204|MSRE_MOUSE Macrophage scavenger receptor types I and II OS=Mus musculus OX=10090 GN=Msr1 PE=1 SV=3	35855.8	160100	497684	292796	236918	135137	236082	153609	126722	161846	296761	372249	469297	502965	218604	119475	332883	175531	152530	105931	121818	816971	307153	204339	101185	114668	644343	388342	183088	117250	187715	306504	293432	351579	279736	219314	410359	357731
P30275	KCRU_MOUSE Creatine kinase U-type, mitochondrial OS=Mus musculus OX=10090 GN=Ckmt1 PE=1 SV=1	Ckmt1	sp|P30275|KCRU_MOUSE Creatine kinase U-type, mitochondrial OS=Mus musculus OX=10090 GN=Ckmt1 PE=1 SV=1	sp|P30275|KCRU_MOUSE Creatine kinase U-type, mitochondrial OS=Mus musculus OX=10090 GN=Ckmt1 PE=1 SV=1	4326161	458319	445727	1093019	516129	184483	1946223	579095	922351	1435529	257354	0	1253172	415638	1344600	695690	52656.4	1060922	1421307	39324110	310892	4694763	764597	1192026	308010	199049	1637013	1475268	813889	283501	472769	762200	3134520	488650	468603	225938	1011138	1079302
P30355	AL5AP_MOUSE Arachidonate 5-lipoxygenase-activating protein OS=Mus musculus OX=10090 GN=Alox5ap PE=1 SV=2	Alox5ap	sp|P30355|AL5AP_MOUSE Arachidonate 5-lipoxygenase-activating protein OS=Mus musculus OX=10090 GN=Alox5ap PE=1 SV=2	sp|P30355|AL5AP_MOUSE Arachidonate 5-lipoxygenase-activating protein OS=Mus musculus OX=10090 GN=Alox5ap PE=1 SV=2	1179018	651222	3972299	1819292	665915	433433	1846099	1996894	1931312	807903	1067115	2059735	2272655	2127572	803722	1054576	1973307	1763249	1725406	316319	2337079	3445221	2432571	2373880	1037432	1362714	3261603	3806266	2478029	679897	1112122	1185168	2331064	1015951	1602217	3565169	1175887	4097066
P30412	PPIC_MOUSE Peptidyl-prolyl cis-trans isomerase C OS=Mus musculus OX=10090 GN=Ppic PE=1 SV=1	Ppic	sp|P30412|PPIC_MOUSE Peptidyl-prolyl cis-trans isomerase C OS=Mus musculus OX=10090 GN=Ppic PE=1 SV=1	sp|P30412|PPIC_MOUSE Peptidyl-prolyl cis-trans isomerase C OS=Mus musculus OX=10090 GN=Ppic PE=1 SV=1	1101551	1183156	288374	653653	727972	848127	851482	1695481	525971	528718	539645	787001	655036	601189	504555	516666	796556	384966	234608	1235479	564825	942463	553246	895064	284932	612514	1231156	494563	1386848	315920	378091	1458965	432373	908856	517125	799813	489548	744980
P30416	FKBP4_MOUSE Peptidyl-prolyl cis-trans isomerase FKBP4 OS=Mus musculus OX=10090 GN=Fkbp4 PE=1 SV=5	Fkbp4	sp|P30416|FKBP4_MOUSE Peptidyl-prolyl cis-trans isomerase FKBP4 OS=Mus musculus OX=10090 GN=Fkbp4 PE=1 SV=5	sp|P30416|FKBP4_MOUSE Peptidyl-prolyl cis-trans isomerase FKBP4 OS=Mus musculus OX=10090 GN=Fkbp4 PE=1 SV=5	16200710	11380930	16726680	10377870	13794130	9738424	16031920	15558250	22995980	23360830	16841110	12951310	17658290	6775386	11429040	17441330	17535860	10452310	26004130	9473158	4699642	15406300	9056516	8719023	7053550	3871716	12098130	9465423	11796990	4501216	5471768	11971910	11807760	4165106	6449825	8016355	11775830	6502763
P30999	CTND1_MOUSE Catenin delta-1 OS=Mus musculus OX=10090 GN=Ctnnd1 PE=1 SV=2	Ctnnd1	sp|P30999|CTND1_MOUSE Catenin delta-1 OS=Mus musculus OX=10090 GN=Ctnnd1 PE=1 SV=2	sp|P30999|CTND1_MOUSE Catenin delta-1 OS=Mus musculus OX=10090 GN=Ctnnd1 PE=1 SV=2	137639000	67792700	83057030	65293990	70123770	76774530	80649280	70991570	62424880	108161300	86580750	118170700	96992940	55522210	78058940	63510420	79707170	71797150	83684050	84927350	44474190	73474000	60662640	60514160	28482770	50783860	80698350	89080740	88670700	52706270	73924720	73068540	87892260	45197570	79439380	54050000	68977270	57123080
P31230	AIMP1_MOUSE Aminoacyl tRNA synthase complex-interacting multifunctional protein 1 OS=Mus musculus OX=10090 GN=Aimp1 PE=1 SV=2	Aimp1	sp|P31230|AIMP1_MOUSE Aminoacyl tRNA synthase complex-interacting multifunctional protein 1 OS=Mus musculus OX=10090 GN=Aimp1 PE=1 SV=2	sp|P31230|AIMP1_MOUSE Aminoacyl tRNA synthase complex-interacting multifunctional protein 1 OS=Mus musculus OX=10090 GN=Aimp1 PE=1 SV=2	550863	568560	394091	195474	516874	379650	402216	412549	354360	377934	658205	523668	487936	206060	398514	501597	601762	469772	676072	395471	236583	424452	109554	172101	148796	195794	92407	531916	133584	31940.2	315199	513396	343819	327544	529519	324077	292171	99631.2
P31649	S6A13_MOUSE Sodium- and chloride-dependent GABA transporter 2 OS=Mus musculus OX=10090 GN=Slc6a13 PE=1 SV=1	Slc6a13	sp|P31649|S6A13_MOUSE Sodium- and chloride-dependent GABA transporter 2 OS=Mus musculus OX=10090 GN=Slc6a13 PE=1 SV=1	sp|P31649|S6A13_MOUSE Sodium- and chloride-dependent GABA transporter 2 OS=Mus musculus OX=10090 GN=Slc6a13 PE=1 SV=1	15706930	22960000	12867320	10360340	13802730	15278190	14373760	14269510	12136370	11690750	28291340	28848840	9372473	16935250	13204000	17584690	23306570	11952120	17453090	8465960	22470690	21997280	18894680	14546060	13841600	18267600	26361030	26725690	21539460	9686289	26126340	26579670	45842240	15581660	17752130	15927690	20312550	11876340
P31651	S6A12_MOUSE Sodium- and chloride-dependent betaine transporter OS=Mus musculus OX=10090 GN=Slc6a12 PE=2 SV=1	Slc6a12	sp|P31651|S6A12_MOUSE Sodium- and chloride-dependent betaine transporter OS=Mus musculus OX=10090 GN=Slc6a12 PE=2 SV=1	sp|P31651|S6A12_MOUSE Sodium- and chloride-dependent betaine transporter OS=Mus musculus OX=10090 GN=Slc6a12 PE=2 SV=1	73493770	97399960	53500020	56394150	58153580	77995630	59107060	78618370	68423540	73398850	97603040	180886900	72698430	79949510	64913430	73562630	74055100	64790880	76160550	60659780	111071100	117772500	116064200	114878300	96525710	113130200	93841500	129326500	151317300	83929460	118083000	130336100	233375000	94224740	125658700	85505290	130217600	62395820
P31786	ACBP_MOUSE Acyl-CoA-binding protein OS=Mus musculus OX=10090 GN=Dbi PE=1 SV=2	Dbi	sp|P31786|ACBP_MOUSE Acyl-CoA-binding protein OS=Mus musculus OX=10090 GN=Dbi PE=1 SV=2	sp|P31786|ACBP_MOUSE Acyl-CoA-binding protein OS=Mus musculus OX=10090 GN=Dbi PE=1 SV=2	1909843	2974568	1024932	91178.5	5673249	3529195	1731032	4063949	4273846	3935659	4883071	1727933	1573646	713129	226656	2093474	2383585	2136087	4505345	534573	1391126	816740	951923	889034	1915625	2032735	765678	141600	1028634	120288	858616	1103539	525892	1623963	1016670	692584	871117	221523
P31809	CEAM1_MOUSE Carcinoembryonic antigen-related cell adhesion molecule 1 OS=Mus musculus OX=10090 GN=Ceacam1 PE=1 SV=1	Ceacam1	sp|P31809|CEAM1_MOUSE Carcinoembryonic antigen-related cell adhesion molecule 1 OS=Mus musculus OX=10090 GN=Ceacam1 PE=1 SV=1	sp|P31809|CEAM1_MOUSE Carcinoembryonic antigen-related cell adhesion molecule 1 OS=Mus musculus OX=10090 GN=Ceacam1 PE=1 SV=1	21826040	12970420	11091590	6980329	12602620	6805970	14675940	13014900	7661706	17644200	30364830	17627340	8354735	10182620	8588014	10116820	16999040	6311149	10994690	16688520	19705490	9135302	14957170	6564081	8498369	12256540	20114940	20693870	16293010	7465957	16549080	12293270	32323160	11990270	11008480	11855310	13504970	10316380
P31938	MP2K1_MOUSE Dual specificity mitogen-activated protein kinase kinase 1 OS=Mus musculus OX=10090 GN=Map2k1 PE=1 SV=2	Map2k1	sp|P31938|MP2K1_MOUSE Dual specificity mitogen-activated protein kinase kinase 1 OS=Mus musculus OX=10090 GN=Map2k1 PE=1 SV=2	sp|P31938|MP2K1_MOUSE Dual specificity mitogen-activated protein kinase kinase 1 OS=Mus musculus OX=10090 GN=Map2k1 PE=1 SV=2	1241562	1881814	969998	2573594	396981	728177	1663665	1422517	1723643	1062822	731546	3011859	1606731	2257299	623086	547636	3921756	974016	1728460	2153296	2305040	2850492	3730707	1792964	1331924	1947872	4413276	3144409	3230649	690602	432916	3606639	4892882	2726216	1009671	3713009	4112033	2582267
P31996	CD68_MOUSE Macrosialin OS=Mus musculus OX=10090 GN=Cd68 PE=1 SV=1	Cd68	sp|P31996|CD68_MOUSE Macrosialin OS=Mus musculus OX=10090 GN=Cd68 PE=1 SV=1	sp|P31996|CD68_MOUSE Macrosialin OS=Mus musculus OX=10090 GN=Cd68 PE=1 SV=1	158594	29396	142402	158093	46144.8	0	46668.8	152801	28557.5	98099.3	119702	110063	152429	102709	0	76330.5	75637	78459.8	0	50042.6	46916.2	49282.1	127579	11647.3	95721.1	23803.9	1762233	510497	10259.4	102966	52551.3	51896.5	12046.6	102797	121874	148730	185970	366220
P32020	NLTP_MOUSE Non-specific lipid-transfer protein OS=Mus musculus OX=10090 GN=Scp2 PE=1 SV=3	Scp2	sp|P32020|NLTP_MOUSE Non-specific lipid-transfer protein OS=Mus musculus OX=10090 GN=Scp2 PE=1 SV=3	sp|P32020|NLTP_MOUSE Non-specific lipid-transfer protein OS=Mus musculus OX=10090 GN=Scp2 PE=1 SV=3	11729200000	13887710000	14834840000	17161010000	13685360000	13343710000	16788900000	20211890000	18922080000	16527800000	15118480000	10039670000	17523350000	7040072000	16757740000	20527630000	12185410000	15985800000	17105180000	6317049000	5858713000	8432193000	5900455000	8861201000	5640480000	5314028000	8539693000	6830862000	7331831000	6432858000	8016451000	7994267000	8058068000	8016363000	7380988000	5890460000	4561245000	6436249000
P32233	DRG1_MOUSE Developmentally-regulated GTP-binding protein 1 OS=Mus musculus OX=10090 GN=Drg1 PE=1 SV=1	Drg1	sp|P32233|DRG1_MOUSE Developmentally-regulated GTP-binding protein 1 OS=Mus musculus OX=10090 GN=Drg1 PE=1 SV=1	sp|P32233|DRG1_MOUSE Developmentally-regulated GTP-binding protein 1 OS=Mus musculus OX=10090 GN=Drg1 PE=1 SV=1	2855667	8820529	11063080	10330490	2062856	5080276	7874856	10538750	10612200	2166169	8106030	10850460	7613463	9165815	1391709	7623610	12316610	7432318	11094950	1726107	9425206	13467510	10076820	10273210	886634	6192715	8585619	10265070	10010660	2178278	4344792	8146699	14513690	1404115	8416468	10212780	9288490	8116031
P32261	ANT3_MOUSE Antithrombin-III OS=Mus musculus OX=10090 GN=Serpinc1 PE=1 SV=1	Serpinc1	sp|P32261|ANT3_MOUSE Antithrombin-III OS=Mus musculus OX=10090 GN=Serpinc1 PE=1 SV=1	sp|P32261|ANT3_MOUSE Antithrombin-III OS=Mus musculus OX=10090 GN=Serpinc1 PE=1 SV=1	184153000	280725100	267261900	226916700	258665100	321196000	319131800	370108300	310340500	276367700	329598600	290705500	266261400	312855100	296707900	367870400	344779500	326553400	333394700	74809240	409720600	295306500	332328300	347833500	90713140	179825900	405251100	286163700	346395900	71516050	222445300	301043400	642752100	154837600	268458300	332094100	262824800	285404300
P32507	NECT2_MOUSE Nectin-2 OS=Mus musculus OX=10090 GN=Nectin2 PE=1 SV=2	Nectin2	sp|P32507|NECT2_MOUSE Nectin-2 OS=Mus musculus OX=10090 GN=Nectin2 PE=1 SV=2	sp|P32507|NECT2_MOUSE Nectin-2 OS=Mus musculus OX=10090 GN=Nectin2 PE=1 SV=2	121692	716049	488438	166547	259691	493978	259209	674296	362624	591457	344952	261749	355793	260108	84279.9	159197	410501	383962	115418	384664	114077	1267430	488496	269202	545358	271977	1014478	858636	661341	99434.8	382059	602913	859187	962737	392520	855394	553008	390272
P32883	RASK_MOUSE GTPase KRas OS=Mus musculus OX=10090 GN=Kras PE=1 SV=1	Kras	sp|P32883|RASK_MOUSE GTPase KRas OS=Mus musculus OX=10090 GN=Kras PE=1 SV=1	sp|P32883|RASK_MOUSE GTPase KRas OS=Mus musculus OX=10090 GN=Kras PE=1 SV=1	3498581	4424226	4489755	3235206	2299431	4958428	3627636	3608877	2325930	2015217	3158159	2210668	4377429	3737579	3400672	2021561	3876493	2819121	3409487	2930137	3017933	6155756	3258668	2802389	1919419	1602429	7652005	3140496	2119756	2143003	2715145	3822986	3481636	1327338	1397764	2300876	2449574	2704817
P32921	SYWC_MOUSE Tryptophan--tRNA ligase, cytoplasmic OS=Mus musculus OX=10090 GN=Wars PE=1 SV=2	Wars	sp|P32921|SYWC_MOUSE Tryptophan--tRNA ligase, cytoplasmic OS=Mus musculus OX=10090 GN=Wars PE=1 SV=2	sp|P32921|SYWC_MOUSE Tryptophan--tRNA ligase, cytoplasmic OS=Mus musculus OX=10090 GN=Wars PE=1 SV=2	1120201	1670973	2919841	1210692	934112	673423	2490800	1158976	1180712	1041097	1267481	3469771	2392198	934888	818434	1770594	3160691	595613	912793	948058	854142	3412382	976165	244604	322157	781432	2915648	1955380	647456	274974	968231	1787737	1535936	255023	698265	1110312	640048	1751263
P33267	CP2F2_MOUSE Cytochrome P450 2F2 OS=Mus musculus OX=10090 GN=Cyp2f2 PE=1 SV=1	Cyp2f2	sp|P33267|CP2F2_MOUSE Cytochrome P450 2F2 OS=Mus musculus OX=10090 GN=Cyp2f2 PE=1 SV=1	sp|P33267|CP2F2_MOUSE Cytochrome P450 2F2 OS=Mus musculus OX=10090 GN=Cyp2f2 PE=1 SV=1	844368000	1520278000	1251166000	1380261000	786596400	1310639000	1652845000	2305835000	1928765000	804003900	1442807000	1649332000	1079357000	1362955000	1047514000	1282733000	1542434000	1645519000	2323590000	383887300	981686700	2389334000	2455940000	1936459000	712376800	1104916000	3038634000	2141472000	2117330000	918028800	1215535000	2013180000	2445511000	1224813000	1477959000	2455870000	1725268000	1545771000
P33587	PROC_MOUSE Vitamin K-dependent protein C OS=Mus musculus OX=10090 GN=Proc PE=1 SV=2	Proc	sp|P33587|PROC_MOUSE Vitamin K-dependent protein C OS=Mus musculus OX=10090 GN=Proc PE=1 SV=2	sp|P33587|PROC_MOUSE Vitamin K-dependent protein C OS=Mus musculus OX=10090 GN=Proc PE=1 SV=2	6129709	12832000	11047250	8843852	9332723	15685180	12018870	15451600	14336960	7631976	11391480	8738718	10737020	11103410	11587640	17728070	12659930	15048070	17427010	2559971	12645790	15163000	13654730	16878400	1587472	5462422	10560720	8208535	11093160	2362475	7032910	13668590	24129450	4193247	8287520	12349630	9052400	10272710
[truncated: 2,610 more rows]

## Sheet: logarithm_transform
Supplemental Table 2.Proteins detected in the 38 samples. Transformed values by the logarithm are reported in here.
Protein Metadata
[truncated: 3,242 more rows]
