# Supplementary material for: Acute exercise dynamically modulates the hepatic mitochondrial proteome
Source: Royal Society of Chemistry journal article supplement (doi:10.1039/d2mo00143h), 2022-07-29
Supplement: d2mo00143h3.xlsx [file d2mo00143h3.xlsx]

## Sheet: REACTOME
Supplemental Table 3.Reactome analysis on all the proteins detected in the 38 samples.
Enrichment FDR	nGenes	Pathway Genes	Fold Enrichment	Pathway	URL	Genes	Enrichment FDR
2.43978e-258	810	1696	3.29513	Metabolism	https://reactome.org/download/current	Dlat Sdhd Ckmt1 Comt Dbt Ndufa9 Atp5pb Gm2a Hk2 Haao Ftcd Agpat3 Ckb Srr Acp5 Kpnb1 Cyp51a1 Akr1b1 Gstt1 Tat Coasy Ugp2 Blvra Idh3g Ndufa11 Abhd3 Pon1 Gnmt Timmdc1 Cd36 Apoe Stard3nl Atp5f1d Prodh Slc25a1 Cyp17a1 As3mt Crot Gcdh Gstm5 Gstm7 Hmox2 Psap Lpcat3 Pnpla6 Etfb Dlst Lbr Mri1 Cd44 Man2b1 Hmox1 Ndufs3 Cyp2a5 Pcyt1a Cs Sqor Shpk Ggt5 Ggt1 Gcat Elovl1 Srm Pdk1 Acot13 B4galnt1 Neu1 Mgst1 Sard…	257.613
4.66806e-83	548	1685	2.24385	Metabolism of proteins	https://reactome.org/download/current	Gnai3 Galnt1 Rab5b Rpl13 Oxa1l Lman2l Cct3 Mrpl10 Tubb6 Uba1 Psmc3 Napsa Golga2 Ykt6 Mrpl2 Apoe Rab8a Ranbp2 Mrpl4 Keap1 Prkcsh Rps11 Cp Man1a Calr Rpl8 Cul3 Etfb Pex5 Psmd4 Psmb4 Rcn1 Napa Rps9 Usp19 Psmd2 Neu1 Mrpl49 Cct4 Rhoa Ctsd Rpl10 Rps15a Man1a2 Vdac3 Ube2g2 Rps25 Stx5a Gosr1 Rpl15 Rps5 St3gal1 Mrps25 Psmb1 Gzmb Hspa8 Psma2 Capza2 Ctsz Eif3d Ttll12 Psmd3 Rpl19 Psmd11 Rhot1 Pigt Ctsa Rab5a…	82.3309
8.64799e-79	282	609	3.19481	Metabolism of lipids	https://reactome.org/download/current	Gm2a Agpat3 Kpnb1 Cyp51a1 Akr1b1 Abhd3 Pon1 Stard3nl Slc25a1 Cyp17a1 Crot Psap Lpcat3 Pnpla6 Lbr Pcyt1a Ggt5 Ggt1 Elovl1 Acot13 B4galnt1 Neu1 Kdsr Aldh3a2 Fads1 Vac14 Acsf3 Ppt2 Cers2 Lta4h Hsd11b1 Acot8 Ctsa Rab5a Ptgis Stard3 Acadvl Acsl1 Fdxr Slc22a5 Rab4a Smpd2 Sgpl1 Osbpl8 Acsl6 Rufy1 Acaca Pctp Arsg Acox1 Abcc3 Acly Galc Sptlc2 Slc10a1 Esyt2 Akr1c6 Akr1c13 Acot2 Acot3 Fdft1 Elovl2 Eci2 Ptds…	78.0631
2.03295e-77	160	232	4.75823	Translation	https://reactome.org/download/current	Rpl13 Oxa1l Mrpl10 Mrpl2 Mrpl4 Rps11 Rpl8 Rps9 Mrpl49 Rpl10 Rps15a Rps25 Rpl15 Rps5 Mrps25 Eif3d Rpl19 Mrpl58 Mrpl24 Ppa1 Rps27a Mrps24 Mrpl22 Mrpl38 Srp68 Eif2s1 Eif5 Gfm2 Mrps30 Pabpc1 Eif3h Eif3e Mrpl13 Mrpl40 Mrpl39 Mrps23 Mrpl28 Etf1 Mrps18b Rps14 Mrpl16 Mrpl21 Mrpl11 Eif3a Rps24 Rps26 Rplp2 Rpl14 Eef1b Eif5b Mrpl44 Mrrf Eif3m Mrps5 Gfm1 Ppa2 Rps3a1 Mrpl9 Eif4e Rps20 Rps6 Mrpl37 Eif3i Mrps15…	76.6919
2.7579e-71	257	557	3.1834	Neutrophil degranulation	https://reactome.org/download/current	Itgb2 Gm2a Rab5b Ddx3x Dnajc5 Kpnb1 Tubb5 Jup Rac1 Psmc3 Cd36 Ap2a2 Ap1m1 Pafah1b2 Ncstn Hmox2 Psap Ptpn6 Cstb Cd44 Man2b1 Pgrmc1 Psmd2 Neu1 Rhoa Ctsd Arpc5 Mgst1 Mpo Pgam1 Psmb1 Surf4 Galns Cybb Golga7 Hspa8 Psma2 Lta4h Ctsz Lamp2 Psmd3 Psmd11 Mmp9 Ghdc Ctsa Cyb5r3 Dync1h1 Cd68 Rab5c Atp6v0a1 Gyg Fuca2 Arg1 Cand1 Elane Actr2 Pfkl Dbnl Rab10 Pecam1 Psmd12 Acly Pygl Actr10 Atp6v1d Gdi2 Npc2 Hsp90a…	70.5594
1.3935e-65	363	1012	2.4748	Innate Immune System	https://reactome.org/download/current	Itgb2 Gm2a Rab5b Ddx3x Dnajc5 Kpnb1 Tubb5 Jup Rac1 Psmc3 Cd36 Ap2a2 Ap1m1 Pafah1b2 Hck Pld3 Ncstn Dusp3 Hmox2 Psap Ptpn6 Cstb Cd44 Man2b1 Atp6v1b2 Arpc2 Pgrmc1 Cdc42 Ctnnb1 Psmd2 Neu1 Ppp2r1a Bcl2l1 Rhoa Ctsd Arpc5 Mgst1 Mpo Pgam1 Atp6v0d1 Psmb1 Surf4 Yes1 Galns C8g Cybb Golga7 Hspa8 Psma2 Capza2 Lta4h Lbp Ctsz Lamp2 Psmd3 Vtn Psmd11 Mmp9 Ghdc Ctsa Myo1c Cyb5r3 Atox1 Dync1h1 Cd68 Rab5c Atp6v1e1 A…	64.8559
1.54802e-54	101	134	5.20032	The citric acid TCA cycle and respiratory electron transport	https://reactome.org/download/current	Dlat Sdhd Ndufa9 Atp5pb Idh3g Ndufa11 Timmdc1 Atp5f1d Etfb Ndufs3 Cs Pdk1 Sdhb Pdhx Ndufs2 Ndufa2 Atp5e Mdh2 Pdk4 Ndufa12 Ndufs7 Vdac1 Dld L2hgdh Gstz1 Sdha Ndufs6 Pdhb Ndufs4 Sucla2 Ndufb9 Ndufa6 Aco2 Ndufb4 Atp5pf Atp5po Ndufa5 Bsg Glo1 Ndufaf7 Ndufv2 Hagh Me2 Ndufb8 Atp5f1b Atp5a1 Atp5f1c Adhfe1 Ndufs1 Ndufb3 Ndufa10 Fh Ndufa8 Ndufaf1 Ndufaf5 Ndufb5 Acad9 Etfdh Ndufs5 Ldhb Idh2 Tmem126b Ndufc2…	53.8102
6.08709e-52	507	1823	1.91882	Immune System	https://reactome.org/download/current	Trim25 Itgb2 Gm2a Rab5b Ddx3x Dnajc5 Araf Kpnb1 Npepps Tubb6 Col1a1 Tubb5 Jup Rac1 Uba1 Vwf Bcap31 Psmc3 Cd36 Ap2a2 Ap1m1 Pafah1b2 Hck Keap1 Pld3 Ncstn Dusp3 Klc4 Calr Stat3 Hmox2 Psap Ptpn6 Cul3 Stxbp2 Ap1s1 Map2k1 Cstb Cd44 Man2b1 Prlr Eif4g2 Atp6v1b2 Arpc2 Pgrmc1 Cdc42 Kif5b Ctnnb1 Psmd2 Neu1 Ppp2r1a Bcl2l1 Rhoa Ctsd Ap2s1 Arpc5 Mgst1 Ap1b1 Ube2g2 Mpo Met Pgam1 Atp6v0d1 Psmb1 Surf4 Yes1 Galns …	51.2156
1.72194e-50	127	213	4.11375	Metabolism of amino acids and derivatives	https://reactome.org/download/current	Dlat Ckmt1 Dbt Haao Ftcd Ckb Srr Tat Gnmt Prodh Gcdh Dlst Mri1 Sqor Gcat Srm Sardh Slc3a2 Pdhx Slc25a13 Amdhd1 Chdh Pipox Iyd Serinc1 Arg1 Hal Pah Pcbd1 Gamt Ddc Txnrd1 Ogdh Shmt1 Dld Gstz1 Arg2 Aldh6a1 Auh Ckmt2 Mccc2 Pdhb Glud1 Rida Gpt Pycrl Hgd Cbs Gldc Aldh18a1 Hoga1 Got1 Hsd17b10 Paox Asl Dhtkd1 Cps1 Gls Agxt Glul Pycr2 Aldh9a1 Kynu Slc25a12 Gatm Hao1 Ivd Ahcy Mccc1 Tdo2 Cth Slc44a1 Aldh4a1…	49.764
1.9101e-49	228	571	2.75494	Membrane Trafficking	https://reactome.org/download/current	Galnt1 Rab5b Hip1r Lman2l Agpat3 Tubb6 Snx9 Use1 Golga2 Ykt6 Ap2a2 Ap1m1 Rab8a Pafah1b2 Klc4 Dnase2 Ap1s1 Ubqln1 Napa Clint1 Eps15l1 Arpc2 Kif5b M6pr Ap2s1 Arpc5 Ap1b1 Vps4b Stx5a Gosr1 Tsg101 Surf4 Gdi1 Hspa8 Capza2 Vps45 Ctsz Pacsin2 Rab5a Cyth4 Dync1h1 Arrb1 Rab5c Rab4a Rab32 Egfr Tbc1d15 Rab21 Rab1A Actr2 Sptbn1 Sar1b Arf5 Rps27a Dynll2 Apob Trappc12 Itsn2 Rab10 Pafah1b1 Kif1c Cpd Ywhae Gosr2…	48.7189
8.0776e-48	248	663	2.58078	Vesicle-mediated transport	https://reactome.org/download/current	Galnt1 Rab5b Hip1r Lman2l Agpat3 Tubb6 Snx9 Use1 Golga2 Ykt6 Cd36 Ap2a2 Apoe Ap1m1 Rab8a Pafah1b2 Klc4 Dnase2 Calr Ap1s1 Ubqln1 Napa Clint1 Eps15l1 Arpc2 Kif5b M6pr Ap2s1 Arpc5 Cd163 Ap1b1 Vps4b Stx5a Gosr1 Tsg101 Surf4 Gdi1 Hspa8 Capza2 Vps45 Ctsz Pacsin2 Rab5a Cyth4 Sparc Dync1h1 Arrb1 Rab5c Rab4a Rab32 Hsp90b1 Egfr Tbc1d15 Rab21 Rab1A Actr2 Sptbn1 Sar1b Arf5 Rps27a Dynll2 Apob Trappc12 Itsn2 R…	47.0927
2.45964e-47	110	174	4.36171	Fatty acid metabolism	https://reactome.org/download/current	Pon1 Slc25a1 Crot Ggt5 Ggt1 Elovl1 Acot13 Aldh3a2 Fads1 Acsf3 Ppt2 Lta4h Acot8 Ptgis Acadvl Acsl1 Slc22a5 Acsl6 Acaca Pctp Acox1 Acly Akr1c6 Acot2 Acot3 Elovl2 Eci2 Acot12 Acox2 Hacl1 Ephx2 Slc25a17 Ehhadh Mmut Eci1 Cyp4f14 Hsd17b4 Fads2 Cpt1a Acsl5 Fasn Acot9 Echs1 Hadha Acadl Pecr Dbi Phyh Acbd5 Ptges2 Crat Hsd17b12 Slc27a2 Hao2 Hadh Them4 Decr1 Prkaa2 Scp2 Cpt2 Ppt1 Cyp4b1 Cyp4a14 Mecr Acox3 A…	46.6091
4.72726e-46	86	115	5.15958	GTP hydrolysis and joining of the 60S ribosomal subunit	https://reactome.org/download/current	Rpl13 Rps11 Rpl8 Rps9 Rpl10 Rps15a Rps25 Rpl15 Rps5 Eif3d Rpl19 Rps27a Eif2s1 Eif5 Eif3h Eif3e Rps14 Eif3a Rps24 Rps26 Rplp2 Rpl14 Eif5b Eif3m Rps3a1 Eif4e Rps20 Rps6 Eif3i Rpl22 Rpl6 Rpl28 Eif3c Rps3 Eif3f Rps4x Rpl4 Rpsa Eif3l Eif2s3x Rps27l Rps16 Rpl10a Rpl12 Rps21 Rpl22l1 Rps19 Rpl21 Eif3j2 Rpl7 Rps2 Rpl18a Eif4g1 Rpl27a Rps8 Rps23 Rps10 Eif3b Rpl38 Rpl32 Rpl36 Rpl23a Rpl5 Rpl30 Eif4b Rpl18 R…	45.3254
2.31669e-45	85	114	5.14431	L13a-mediated translational silencing of Ceruloplasmin expression	https://reactome.org/download/current	Rpl13 Rps11 Rpl8 Rps9 Rpl10 Rps15a Rps25 Rpl15 Rps5 Eif3d Rpl19 Rps27a Eif2s1 Pabpc1 Eif3h Eif3e Rps14 Eif3a Rps24 Rps26 Rplp2 Rpl14 Eif3m Rps3a1 Eif4e Rps20 Rps6 Eif3i Rpl22 Rpl6 Rpl28 Eif3c Rps3 Eif3f Rps4x Rpl4 Rpsa Eif3l Eif2s3x Rps27l Rps16 Rpl10a Rpl12 Rps21 Rpl22l1 Rps19 Rpl21 Eif3j2 Rpl7 Rps2 Rpl18a Eif4g1 Rpl27a Rps8 Rps23 Rps10 Eif3b Rpl38 Rpl32 Rpl36 Rpl23a Rpl5 Rpl30 Eif4b Rpl18 Rpl11…	44.6351
7.30791e-44	87	122	4.92009	Eukaryotic Translation Initiation	https://reactome.org/download/current	Rpl13 Rps11 Rpl8 Rps9 Rpl10 Rps15a Rps25 Rpl15 Rps5 Eif3d Rpl19 Rps27a Eif2s1 Eif5 Pabpc1 Eif3h Eif3e Rps14 Eif3a Rps24 Rps26 Rplp2 Rpl14 Eif5b Eif3m Rps3a1 Eif4e Rps20 Rps6 Eif3i Rpl22 Rpl6 Rpl28 Eif3c Rps3 Eif3f Rps4x Rpl4 Rpsa Eif3l Eif2s3x Rps27l Rps16 Rpl10a Rpl12 Rps21 Rpl22l1 Rps19 Rpl21 Eif3j2 Rpl7 Rps2 Rpl18a Eif4g1 Rpl27a Rps8 Rps23 Rps10 Eif3b Rpl38 Rpl32 Rpl36 Rpl23a Rpl5 Rpl30 Eif4b …	43.1362
7.30791e-44	87	122	4.92009	Cap-dependent Translation Initiation	https://reactome.org/download/current	Rpl13 Rps11 Rpl8 Rps9 Rpl10 Rps15a Rps25 Rpl15 Rps5 Eif3d Rpl19 Rps27a Eif2s1 Eif5 Pabpc1 Eif3h Eif3e Rps14 Eif3a Rps24 Rps26 Rplp2 Rpl14 Eif5b Eif3m Rps3a1 Eif4e Rps20 Rps6 Eif3i Rpl22 Rpl6 Rpl28 Eif3c Rps3 Eif3f Rps4x Rpl4 Rpsa Eif3l Eif2s3x Rps27l Rps16 Rpl10a Rpl12 Rps21 Rpl22l1 Rps19 Rpl21 Eif3j2 Rpl7 Rps2 Rpl18a Eif4g1 Rpl27a Rps8 Rps23 Rps10 Eif3b Rpl38 Rpl32 Rpl36 Rpl23a Rpl5 Rpl30 Eif4b …	43.1362
2.03517e-43	80	106	5.20712	Protein localization	https://reactome.org/download/current	Pxmp4 Emd Pex6 Pex19 Crot Sgta Pex5 Hmox1 Pex1 Aldh3a2 Stx5a Atad1 Acot8 Pipox Pex12 Fis1 Pex3 Pex7 Tysnd1 Pex13 Rps27a Acox1 Pitrm1 Acot2 Acot3 Eci2 Acox2 Hacl1 Ephx2 Dhrs4 Slc25a17 Ehhadh App Vapa Hsd17b4 Cyb5a Ndufb8 Atp5f1b Paox Idh1 Hspd1 Pecr Agxt Phyh Acbd5 Crat Cat Pex16 Hao1 Slc27a2 Hao2 Pex11b Abcd3 Scp2 Hmgcl Pex14 Pex10 Acox3 Gstk1 Usp9x Otc Abcd1 Nudt7 Ldhd Gnpat Nudt19 Acaa1a Decr2 …	42.6914
9.47925e-41	77	104	5.10823	Formation of a pool of free 40S subunits	https://reactome.org/download/current	Rpl13 Rps11 Rpl8 Rps9 Rpl10 Rps15a Rps25 Rpl15 Rps5 Eif3d Rpl19 Rps27a Eif3h Eif3e Rps14 Eif3a Rps24 Rps26 Rplp2 Rpl14 Eif3m Rps3a1 Rps20 Rps6 Eif3i Rpl22 Rpl6 Rpl28 Eif3c Rps3 Eif3f Rps4x Rpl4 Rpsa Eif3l Rps27l Rps16 Rpl10a Rpl12 Rps21 Rpl22l1 Rps19 Rpl21 Eif3j2 Rpl7 Rps2 Rpl18a Rpl27a Rps8 Rps23 Rps10 Eif3b Rpl38 Rpl32 Rpl36 Rpl23a Rpl5 Rpl30 Rpl18 Rpl11 Rpl3 Rpl35a Rpl26 Rps7 Rps17 Rps12 Rpl34…	40.0232
2.0052e-37	112	213	3.62787	Biological oxidations	https://reactome.org/download/current	Comt Cyp51a1 Gstt1 Ugp2 As3mt Gstm5 Gstm7 Cyp2a5 Ggt5 Ggt1 Mgst1 Ptgis Cyb5r3 Fdxr Gstz1 Tpmt Esd Cmbl Oplah Cbr3 Sult1c2 Acy1 Hsp90ab1 Cyp39a1 Cyp4f14 Cndp2 Acy3 Papss2 Cyp2c55 Maoa Gsto1 Paox Cyp2e1 Gsta3 Bpnt1 Mgst3 Fmo3 Acss1 Ahcy Acss2 Gss Aadac Gclm Adh5 Cyp7a1 Slc35d1 Akr1a1 Cyp4b1 Cyp4a14 Akr7a2 Ugdh Sult1b1 Tpst2 Aldh2 Cyp3a25 Cyp3a13 Gstk1 Tbxas1 Cyp2b10 Sult1a1 Acsm2 Acsm5 Cyb5b Fdx1 C…	36.6978
5.18582e-37	71	97	5.0501	Nonsense Mediated Decay NMD independent of the Exon Junction Complex EJC	https://reactome.org/download/current	Rpl13 Rps11 Rpl8 Rps9 Rpl10 Rps15a Rps25 Rpl15 Rps5 Rpl19 Rps27a Pabpc1 Etf1 Rps14 Rps24 Rps26 Rplp2 Rpl14 Rps3a1 Rps20 Rps6 Rpl22 Rpl6 Rpl28 Rps3 Rps4x Rpl4 Rpsa Rps27l Rps16 Rpl10a Rpl12 Rps21 Rpl22l1 Rps19 Rpl21 Rpl7 Rps2 Rpl18a Eif4g1 Rpl27a Rps8 Rps23 Rps10 Rpl38 Rpl32 Rpl36 Upf1 Rpl23a Rpl5 Rpl30 Rpl18 Rpl11 Rpl3 Rpl35a Rpl26 Rps7 Rps17 Rps12 Rpl34 Gspt1 Rpl17 Rpl35 Rpl27 Rps15 Rplp0 Rps28 …	36.2852
3.17865e-35	126	270	3.21974	Asparagine N-linked glycosylation	https://reactome.org/download/current	Lman2l Tubb6 Golga2 Ykt6 Man1a Calr Napa Neu1 Man1a2 Stx5a Gosr1 St3gal1 Capza2 Ctsz Ctsa B4galt5 Dync1h1 Mpdu1 Rab1A Sptbn1 Mgat1 Canx Sar1b Arf5 Rps27a Dynll2 Asgr1 Gosr2 Scfd1 Sec23a Mia2 Sptb Fut8 Actr10 Psmc1 Tmed10 Lman2 Arf4 Derl1 Pmm2 St3gal6 St6gal1 Man2a1 Mcfd2 Napg Dctn4 Rab1b Ppp6r3 Actr1a Dctn2 Copg2 Tuba4a Spta1 Copa F5 Sec16b Ppp6c Dolpp1 Sec16a Dync1i2 Pdia3 Arfgap2 Arfgap1 Sec22b…	34.4978
5.65896e-34	68	96	4.8871	SRP-dependent cotranslational protein targeting to membrane	https://reactome.org/download/current	Rpl13 Rps11 Rpl8 Rps9 Rpl10 Rps15a Rps25 Rpl15 Rps5 Rpl19 Rps27a Srp68 Rps14 Rps24 Rps26 Rplp2 Rpl14 Rps3a1 Rps20 Rps6 Rpl22 Rpl6 Rpl28 Rps3 Rps4x Rpl4 Rpsa Rps27l Rps16 Rpl10a Rpl12 Rps21 Rpl22l1 Rps19 Rpl21 Rpl7 Rps2 Rpl18a Rpl27a Rps8 Rps23 Rps10 Rpl38 Rpl32 Rpl36 Rpl23a Rpl5 Rpl30 Rpl18 Rpl11 Rpl3 Rpl35a Rpl26 Rps7 Rps17 Rps12 Rpl34 Rpl17 Rpl35 Rpl27 Rps15 Rplp0 Rps28 Rpl23 Srp54a Rpl31 Rps13…	33.2473
6.6396e-34	63	84	5.17457	Respiratory electron transport ATP synthesis by chemiosmotic coupling and heat production by uncoupling proteins.	https://reactome.org/download/current	Ndufa9 Atp5pb Ndufa11 Timmdc1 Atp5f1d Etfb Ndufs3 Ndufs2 Ndufa2 Atp5e Ndufa12 Ndufs7 Ndufs6 Ndufs4 Ndufb9 Ndufa6 Ndufb4 Atp5pf Atp5po Ndufa5 Ndufaf7 Ndufv2 Ndufb8 Atp5f1b Atp5a1 Atp5f1c Ndufs1 Ndufb3 Ndufa10 Ndufa8 Ndufaf1 Ndufaf5 Ndufb5 Acad9 Etfdh Ndufs5 Tmem126b Ndufc2 Ndufab1 Ndufb11 Etfa Ndufb7 Atp5pd Nubpl Ndufa3 Ndufa13 Ndufv1 Atp5j2 Atp5mg Ndufb10 Ndufa7 Ndufaf6 Atp5k Dmac2l mt-Nd1 Mtnd2 …	33.1779
3.81053e-31	53	66	5.54045	Peroxisomal protein import	https://reactome.org/download/current	Pex6 Crot Pex5 Pex1 Acot8 Pipox Pex12 Pex7 Tysnd1 Pex13 Rps27a Acox1 Acot2 Acot3 Eci2 Acox2 Hacl1 Ephx2 Dhrs4 Ehhadh Hsd17b4 Paox Idh1 Pecr Agxt Phyh Crat Cat Hao1 Slc27a2 Hao2 Scp2 Hmgcl Pex14 Pex10 Acox3 Gstk1 Usp9x Nudt7 Gnpat Nudt19 Acaa1a Decr2 Baat Dao Lonp2 Acot4 Ech1 Ide Ddo Pex26 Mlycd Ube2d2a	30.419
1.42754e-30	73	118	4.26829	Nonsense-Mediated Decay NMD	https://reactome.org/download/current	Rpl13 Rps11 Rpl8 Rps9 Ppp2r1a Rpl10 Rps15a Rps25 Rpl15 Rps5 Rpl19 Ppp2ca Rps27a Pabpc1 Etf1 Rps14 Rps24 Rps26 Rplp2 Rpl14 Rps3a1 Rps20 Rps6 Rpl22 Rpl6 Rpl28 Rps3 Rps4x Rpl4 Rpsa Rps27l Rps16 Rpl10a Rpl12 Rps21 Rpl22l1 Rps19 Rpl21 Rpl7 Rps2 Rpl18a Eif4g1 Rpl27a Rps8 Rps23 Rps10 Rpl38 Rpl32 Rpl36 Upf1 Rpl23a Rpl5 Rpl30 Rpl18 Rpl11 Rpl3 Rpl35a Rpl26 Rps7 Rps17 Rps12 Rpl34 Gspt1 Rpl17 Rpl35 Rpl27 Rps…	29.8454
1.42754e-30	73	118	4.26829	Nonsense Mediated Decay NMD enhanced by the Exon Junction Complex EJC	https://reactome.org/download/current	Rpl13 Rps11 Rpl8 Rps9 Ppp2r1a Rpl10 Rps15a Rps25 Rpl15 Rps5 Rpl19 Ppp2ca Rps27a Pabpc1 Etf1 Rps14 Rps24 Rps26 Rplp2 Rpl14 Rps3a1 Rps20 Rps6 Rpl22 Rpl6 Rpl28 Rps3 Rps4x Rpl4 Rpsa Rps27l Rps16 Rpl10a Rpl12 Rps21 Rpl22l1 Rps19 Rpl21 Rpl7 Rps2 Rpl18a Eif4g1 Rpl27a Rps8 Rps23 Rps10 Rpl38 Rpl32 Rpl36 Upf1 Rpl23a Rpl5 Rpl30 Rpl18 Rpl11 Rpl3 Rpl35a Rpl26 Rps7 Rps17 Rps12 Rpl34 Gspt1 Rpl17 Rpl35 Rpl27 Rps…	29.8454
1.86437e-30	350	1321	1.82801	Post-translational protein modification	https://reactome.org/download/current	Galnt1 Rab5b Lman2l Tubb6 Uba1 Psmc3 Golga2 Ykt6 Apoe Rab8a Ranbp2 Keap1 Prkcsh Cp Man1a Calr Cul3 Etfb Pex5 Psmd4 Psmb4 Rcn1 Napa Usp19 Psmd2 Neu1 Rhoa Man1a2 Vdac3 Ube2g2 Stx5a Gosr1 St3gal1 Psmb1 Hspa8 Psma2 Capza2 Ctsz Ttll12 Psmd3 Psmd11 Rhot1 Pigt Ctsa Rab5a B4galt5 Uchl5 Psmb6 Dync1h1 Pex12 Mpdu1 Arrb1 Rab5c Calm1 Fkbp8 Rab4a Snx3 Fuca2 Rab32 Vnn3 Hsp90b1 Cand1 Rab21 Rab1A Pofut2 Fbxw11 Pe…	29.7295
3.78244e-30	49	59	5.73004	Respiratory electron transport	https://reactome.org/download/current	Ndufa9 Ndufa11 Timmdc1 Etfb Ndufs3 Ndufs2 Ndufa2 Ndufa12 Ndufs7 Ndufs6 Ndufs4 Ndufb9 Ndufa6 Ndufb4 Ndufa5 Ndufaf7 Ndufv2 Ndufb8 Ndufs1 Ndufb3 Ndufa10 Ndufa8 Ndufaf1 Ndufaf5 Ndufb5 Acad9 Etfdh Ndufs5 Tmem126b Ndufc2 Ndufab1 Ndufb11 Etfa Ndufb7 Nubpl Ndufa3 Ndufa13 Ndufv1 Ndufb10 Ndufa7 Ndufaf6 mt-Nd1 Mtnd2 Mtnd4 mt-Nd5 Ecsit Ndufaf2 Ndufaf3 Ndufb6	29.4222
2.79332e-29	46	54	5.87729	Complex I biogenesis	https://reactome.org/download/current	Ndufa9 Ndufa11 Timmdc1 Ndufs3 Ndufs2 Ndufa2 Ndufa12 Ndufs7 Ndufs6 Ndufs4 Ndufb9 Ndufa6 Ndufb4 Ndufa5 Ndufaf7 Ndufv2 Ndufb8 Ndufs1 Ndufb3 Ndufa10 Ndufa8 Ndufaf1 Ndufaf5 Ndufb5 Acad9 Ndufs5 Tmem126b Ndufc2 Ndufab1 Ndufb11 Ndufb7 Nubpl Ndufa3 Ndufa13 Ndufv1 Ndufb10 Ndufa7 Ndufaf6 mt-Nd1 Mtnd2 Mtnd4 mt-Nd5 Ecsit Ndufaf2 Ndufaf3 Ndufb6	28.5539
7.56813e-29	61	90	4.67628	Mitochondrial translation	https://reactome.org/download/current	Oxa1l Mrpl10 Mrpl2 Mrpl4 Mrpl49 Mrps25 Mrpl58 Mrpl24 Mrps24 Mrpl22 Mrpl38 Gfm2 Mrps30 Mrpl13 Mrpl40 Mrpl39 Mrps23 Mrpl28 Mrps18b Mrpl16 Mrpl21 Mrpl11 Mrpl44 Mrrf Mrps5 Gfm1 Mrpl9 Mrpl37 Mrps15 Mrpl1 Mrpl53 Mrpl19 Mrps11 Mrpl46 Mrpl17 Mrps31 Mrps22 Mrpl3 Gadd45gip1 Mrpl15 Mrps17 Mrpl34 Mrps2 Mrpl41 Mrpl47 Mrps26 Mrpl23 Mrps34 Mrpl12 Mrps35 Mrps27 Mrpl50 Mrps7 Mrps16 Mrpl35 Mrps21 Mrpl18 Mrps14 Mrp…	28.121

## Sheet: complexes
Supplemental Table 3. Complexes enrichment in the data set.							Supplemental Table 3. Complexes enrichment
Enrichment FDR	nGenes	Pathway Genes	Fold Enrichment	Pathway	URL	Genes	Enrichment FDR
5.25929e-21	30	32	6.46822	Respiratory chain complex I mitochondrial	https://mips.helmholtz-muenchen.de/corum	Ndufb11 mt-Nd1 Mtnd4 Ndufb6 Ndufa12 Ndufs8 Ndufs1 Ndufs2 Ndufv1 Ndufs5 Ndufa5 Ndufc2 Ndufa2 Ndufa3 Ndufb4 Ndufb5 Ndufb9 Ndufa6 Ndufb3 Ndufs4 Ndufb8 Ndufv2 Ndufa9 Ndufs7 Ndufa8 Ndufb10 Ndufa13 Mtnd2 mt-Nd5 Ndufa7	20.2791
8.83247e-06	22	46	3.29973	Parvulin-associated pre-rRNP complex	https://mips.helmholtz-muenchen.de/corum	Rpl21 Ncl Fn1 Rpl7a Rplp0 Rpl3 Rpl18 Rpl6 Rpl13 Rpl26 Rps4x Rpl18a Rps6 Rps3 Rpl8 Rpl19 Rps3a1 Tubb5 Ddx5 Rpl14 Rpl15 Rpl4	5.05392
1.42864e-05	9	10	6.20949	Immunoproteasome	https://mips.helmholtz-muenchen.de/corum	Psmb10 Psma3 Psma6 Psma4 Psmb3 Psmb2 Psma1 Psma7 Psma5	4.84508
1.42864e-05	9	10	6.20949	(ER)-localized multiprotein complex Ig heavy chains associated	https://mips.helmholtz-muenchen.de/corum	Pdia4 Hsp90b1 P4hb Hspa5 Ppib Uggt1 Dnajb11 Sdf2l1 Hyou1	4.84508
0.000433971	6	6	6.89943	CCT complex (chaperonin containing TCP1 complex)	https://mips.helmholtz-muenchen.de/corum	Tcp1 Cct8 Cct7 Cct2 Cct5 Cct3	3.36254
0.00214157	5	5	6.89943	Wave-2 complex (Rac-activated)	https://mips.helmholtz-muenchen.de/corum	Nckap1 Cyfip1 Wasf2 Rac1 Abi1	2.66927
0.00214157	6	7	5.9138	CCT complex (chaperonin containing TCP1 complex) testis specific	https://mips.helmholtz-muenchen.de/corum	Tcp1 Cct8 Cct7 Cct2 Cct5 Cct3	2.66927
0.00582979	6	8	5.17457	Drosha complex	https://mips.helmholtz-muenchen.de/corum	Dhx15 Hnrnph1 Ddx17 Ddx5 Tardbp Hnrnpm	2.23435
0.0103541	4	4	6.89943	Wave-2 complex	https://mips.helmholtz-muenchen.de/corum	Nckap1 Cyfip1 Wasf2 Abi1	1.98489
0.0103541	4	4	6.89943	Succinate dehydrogenase complex II mitochondrial	https://mips.helmholtz-muenchen.de/corum	Sdha Sdhb Sdhd Sdhc	1.98489
0.0221432	5	7	4.92817	SNARE complex (Stx4 Stx6 Stx7 Vamp3 Vamp7 Vamp8 Vti1b)	https://mips.helmholtz-muenchen.de/corum	Vamp8 Stx7 Vti1b Stx4a Stx6	1.65476
0.0274981	5	8	4.31215	Cytochrome c oxidase mitochondrial	https://mips.helmholtz-muenchen.de/corum	Mtco2 Cox5a Cox4i1 Cox6c Ptgs1	1.5607
0.0274981	3	3	6.89943	SNARE complex (Vti1b Stx6 Stx7)	https://mips.helmholtz-muenchen.de/corum	Stx7 Vti1b Stx6	1.5607
0.0274981	3	3	6.89943	Sec61alpha-CollagenIV-Hsp47 complex	https://mips.helmholtz-muenchen.de/corum	Col4a1 Serpinh1 Sec61a1	1.5607
0.0274981	3	3	6.89943	SNARE complex (Stx4 Vamp8 Snap23)	https://mips.helmholtz-muenchen.de/corum	Snap23 Vamp8 Stx4a	1.5607
0.0274981	3	3	6.89943	Itgav-Itgb3-Gsn complex	https://mips.helmholtz-muenchen.de/corum	Itgb3 Gsn Itgav	1.5607
0.0274981	3	3	6.89943	Itga-Itgb1-Ppap2b complex	https://mips.helmholtz-muenchen.de/corum	Itgb1 Itga5 Plpp3	1.5607
0.0274981	5	8	4.31215	Profilin 2 complex	https://mips.helmholtz-muenchen.de/corum	Nckap1 Dnm1 Hspa8 Rock2 Cyfip1	1.5607
0.0274981	3	3	6.89943	P14-Mp1-Erk1/2 complex	https://mips.helmholtz-muenchen.de/corum	Lamtor3 Mapk1 Mapk3	1.5607
0.0274981	3	3	6.89943	Dnajc5-Sgta complex	https://mips.helmholtz-muenchen.de/corum	Dnajc5 Hspa8 Sgta	1.5607
0.0274981	3	3	6.89943	PHB-ANX2-CD36 complex	https://mips.helmholtz-muenchen.de/corum	Anxa2 Phb Cd36	1.5607
0.0274981	3	3	6.89943	Ezrin-Nherf1-Irbit-NHE3 complex	https://mips.helmholtz-muenchen.de/corum	Ezr Slc9a3r1 Ahcyl1	1.5607
0.0274981	3	3	6.89943	Arrb1-Becn1-Pik3c3 complex induced by (OGD) oxygen-glucose deprivation	https://mips.helmholtz-muenchen.de/corum	Becn1 Pik3c3 Arrb1	1.5607
0.0274981	3	3	6.89943	Amfr-Vcp-Ubxn1 complex	https://mips.helmholtz-muenchen.de/corum	Vcp Ubxn1 Amfr	1.5607
0.0274981	4	5	5.51955	Amfr-Vcp-Ubxn1-Ngly1-Rad23b complex	https://mips.helmholtz-muenchen.de/corum	Rad23b Vcp Ubxn1 Amfr	1.5607
0.0274981	3	3	6.89943	Abca1-Apoa1-Snta1 complex	https://mips.helmholtz-muenchen.de/corum	Abca1 Apoa1 Snta1	1.5607
0.0433939	4	6	4.59962	Metallothionein-3 complex	https://mips.helmholtz-muenchen.de/corum	Dpysl2 Hsp90ab1 Ckb Hspa1a	1.36257
0.0433939	4	6	4.59962	Ksr1-CK2-MEK-14-3-3 complex PDGF treated	https://mips.helmholtz-muenchen.de/corum	Map2k1 Ywhaz Csnk2b Csnk2a1	1.36257
