# Supplementary material for: Acute exercise dynamically modulates the hepatic mitochondrial proteome
Source: Royal Society of Chemistry journal article supplement (doi:10.1039/d2mo00143h), 2022-07-29
Supplement: d2mo00143h5.xlsx [file d2mo00143h5.xlsx]

## Sheet: Sedentary_Exercise_forqspec
Supplemental Table 5.Qprot statistics on Sedentary samples vs Exercise samples. A protein is considering changing if Z_score >1.5 and FDR <0.05 (high in exercise and low in sedentary) or Z_score <-1.5 and FDR < 0.05 (high in sedentary and low in exercise).
Protein	S.28	S.36	S.44	S.75	S.83	S.30	S.38	S.48	S.77	S.85	S.27	S.35	S.43	S.82	S.29	S.37	S.49	S.76	S.84	S.32	S.40	S.79	S.87	S.34	S.42	S.50	S.81	S.89	S.31	S.39	S.45	S.78	S.86	S.33	S.41	S.47	S.80	S.88	LogFoldChange	Zstatistic	fdr	FDRup	FDRdown
Fcgr4	66809.7	0	200220	283605	253805	13753.1	0	128768	208528	13701.9	79147.6	103528	23840.2	116594	54048.6	0	72160.9	100492	720770	103754	61015.1	352447	417632	57326.2	5500.22	113690	67269.9	105895	0	145597	171292	134645	17032.5	123518	6324.24	220750	397610	118533	0.271	0.6157	0.87941	0.564122	0.882406
Aspg	1831516	901053	832488	476143	212483	507969	787773	452728	435543	634988	1173306	352108	549839	916108	52066.4	320224	1153412	221057	196528	753990	548810	823195	280447	630183	172324	588184	636851	596365	457399	143235	1302777	236921	76943.1	207500	337824	311159	775040	470034	-0.245	-1.0384	0.515199	0.875662	0.281801
Mpeg1	6517917	7884693	6140790	31420970	17325660	5908305	5028058	11119380	4014082	7056517	5418405	5208841	9561478	6156222	5700667	5678609	8669785	7819868	28152890	5648878	4803509	27534700	30124240	7317620	6331811	11663320	7659007	6519850	3008894	7093648	6248817	9784402	5546689	4237359	7676670	22948940	29098650	7358856	0.055	0.2916	0.987688	0.738901	0.869035
Krt24	14438900	5062152	9448062	6848886	2773931	7951521	1754013	9735014	3852228	4223549	4527928	5529888	6864394	4773001	7813354	8112441	4444070	4465008	4932949	16384250	9489440	9105791	4285320	7113092	7025802	3882192	4021016	4485650	11163790	2446695	10216060	6387322	2934013	6248659	6078111	9353927	5949982	4079211	0.066	0.3705	0.971256	0.703208	0.875202
Arfgef2	1007062	1393858	3052639	1476114	1360803	1077466	1184289	2399086	1336076	1950647	885894	802196	1818521	2946947	2680925	2385921	2048404	1778076	2835020	593655	1167528	1840319	1204168	1099700	1092083	1316584	2616038	1292087	2005485	2803752	2180877	3140755	983110	3514778	1662590	5064938	4563539	1643926	0.059	0.3516	0.975786	0.712183	0.873918
Ptprf	11818820	12774610	13295330	13836110	13702090	9058316	12163680	13995620	13815410	20781550	12276250	7388861	10610600	25008440	6278134	7810352	9003187	10816890	8149776	14045280	15620420	12506690	11076560	12127450	11211610	9796851	11645310	10718900	11756480	8333316	14270990	11066020	13170320	5670366	7031049	13825650	13717460	13896200	-0.028	-0.3292	1	0.879181	0.720375
Ddi2	5790039	4596986	3203441	2822259	1108011	3662687	2627339	3228241	2306681	5684497	831814	1587433	1111810	1729168	886429	758320	979537	1420523	665822	3824598	3216551	2024336	850769	4576153	3563412	3233821	4389293	4291908	623018	1143411	1869550	929953	1128803	560250	849864	853951	839518	1436513	-0.138	-0.712	0.833572	0.893954	0.488002
Ckap5	2842017	3743213	2287726	1425753	6253999	4403281	3797575	7092581	3829346	1271299	2755593	5300759	5018004	7922050	8212393	8605854	8722911	5656220	6639844	2458819	2650172	4016290	3151782	4351677	2503684	6556245	5020903	1943396	5609101	8154368	3206488	9510760	5204108	9218690	9494150	15858120	14059310	9983720	0.186	0.8192	0.739914	0.427064	0.878192
Ndufaf6	1116911	401617	248347	190226	134255	386290	335243	351131	251033	192179	109635	416218	297625	462563	332043	323265	273770	208842	79618.8	385370	277635	284998	309176	540363	623786	137799	489047	689091	263620	126195	353526	332492	337763	275300	155400	243532	602444	138750	0.116	0.6954	0.832731	0.511561	0.881653
Man1b1	7054859	11470570	27404320	8289595	7734861	9368780	4824625	7097801	6601260	6962770	2807307	10235940	12944490	9305026	5531120	5884739	13842530	7979666	14139890	5251796	7908770	9944204	17166380	6883118	6811801	10841630	29428240	14220990	4513945	6168441	16385920	6279375	8245461	2984740	8290387	19902370	10096840	8769726	0.067	0.4935	0.933265	0.638446	0.880833
Pnpla7	1208774	788147	3591678	1193454	1002755	729422	2220471	1629675	1432363	1586926	325758	728780	1141632	2045617	705958	1911320	2056438	3836088	1510556	1111981	808723	1872260	1136736	764880	495974	1816400	1831072	1126076	1992393	1367348	3646449	2053999	1722459	1762960	693128	3400761	2294745	2449238	0.098	0.6051	0.884863	0.570907	0.882407
Fggy	7502969	7010945	10940230	7809898	4896063	8057113	8539121	6426963	6943272	10185440	2282944	2607959	7119131	9802327	1560300	5683661	5710809	7848598	3510274	9193845	7959968	7551889	5971448	8854704	6108056	8134052	7819096	9597491	4260975	5170664	13244160	9763873	4718985	4975956	4158298	7233846	6230074	9521051	0.177	1.7915	0.063622	0.023498	0.837449
Acnat1	138179000	157255800	232364100	137740300	117034400	147702500	132705700	133505100	123982600	136263500	135314300	150014500	144492200	204556800	173083400	228602200	165650000	183929100	157852600	132827500	140878500	158392200	141445500	98818280	116326500	144853100	126659900	110744500	245834100	202216500	169235600	188164700	148529300	182835800	207956800	244314400	189478200	226081100	0.003	0.0314	1	0.823562	0.832387
Slc35d1	1224168	8387787	6759166	9937852	9237759	2932570	7803529	4669594	9762093	12750170	4601177	5758131	12727390	16063200	3066752	10702180	21259700	12391160	15895020	1908372	7704340	16361130	14666790	1051097	4185419	7552428	5711455	14311630	1638000	14643910	17846910	16077900	16410840	2931112	7626163	23382490	16338600	17592790	0.036	0.1361	1	0.795436	0.850297
Dnajc25	2236564	11697490	12041480	11780140	10711480	4466337	6479643	11802300	6649452	9392613	3239877	8164195	10226430	24304860	7695472	8038751	13166060	11493720	10528650	3866079	5944993	11623610	12126430	3388175	5202394	12321510	12261390	15446700	3387033	8260149	10761660	14766960	12071690	2507924	5951935	16975580	18672870	17964610	-0.011	-0.0725	1	0.845091	0.809327
Ubr4	8063006	6065805	6451801	7041997	3498658	8036571	6571552	5507233	5801697	6675736	5368202	5713688	5446223	6123695	6213222	1239960	5285265	5660780	1762111	8547779	6349752	7534537	4345045	8285146	6018537	4948339	8219673	6398040	6718760	5078380	9232507	6324933	4081312	6688377	6785719	8583432	6292267	3900829	0.192	1.4151	0.246985	0.102482	0.848927
Klhdc7a	891749	662475	581787	621288	357428	204080	172907	492426	154435	320523	236098	417550	744083	1014164	715624	905302	656407	1139523	515396	460559	573646	342989	515576	742589	716859	391731	652022	308727	1511918	628671	204813	735331	347865	815499	270398	1235212	732835	1125217	0.143	0.7408	0.801432	0.480752	0.88068
Fmnl2	1760015	410561	1034174	557670	446552	1181944	446110	375852	518100	1369501	1607926	206786	785948	1386460	2026172	361704	895229	1010155	1601663	1142699	586196	617458	622283	1547331	752820	1185016	509703	594174	2653774	971858	770466	549168	354310	2134879	240208	1284293	643732	939607	0.033	0.1488	1	0.791508	0.852164
Ndufaf5	588345	232014	229531	88095.1	66543.2	361017	105116	140687	65612.1	19475.5	321126	315987	214390	361803	729710	395279	367180	382285	199689	528533	332285	380284	157125	318919	151192	70099.7	249919	84897	1152245	213190	361883	257075	106518	623540	439746	832306	649037	55093.9	0.249	0.784	0.7686	0.451175	0.879427
Lrp2	37854280	29171140	32390490	32795470	21786800	31444710	27052960	33686270	22106820	46501520	25608030	22463040	32420410	39184510	28792450	36582950	30199850	31186770	32748010	98638340	46264910	30708150	26565370	33398940	24588810	34735750	40848130	31640870	2530325000	32816140	41921380	25406610	30771330	27928940	37715010	35590130	28321800	30146080	0.335	1.3611	0.283978	0.12201	0.851191
Agmat	467444600	315807200	356765200	210789800	125203700	397988600	204926400	270018600	165618400	119056000	338180100	386797300	315097200	262974900	619546900	415316000	325323700	329571800	165196700	379218800	276506100	226045400	159524500	540787300	281691500	216539900	309350500	146771700	458878200	273437600	343587600	283333000	111721000	680203300	509692000	407186800	361971100	171786600	0.022	0.1405	1	0.794089	0.850951
Slc25a25	16286340	12804830	10147670	9082745	5775861	13739740	8550473	9651225	8880720	5993650	8082125	12472090	9603341	7671884	17035610	13511240	8904446	10983110	7307729	15963770	10156230	17212430	5686976	11611170	9454859	7152759	10830960	7150953	14818720	10271030	12943980	14255880	6656654	11458390	10335180	14926450	12100940	6194612	0.06	0.4584	0.945599	0.658025	0.87968
Dhtkd1	47949360	37838530	33257730	20416590	10886420	45244890	21374620	20860350	21401040	12914800	36787890	31095550	22992850	24065160	41034640	30007290	17407520	33081240	11195070	50775210	29388750	26559100	18196540	54013160	29672780	17354260	30864890	14727790	53759760	33571920	35998940	23422110	14048110	49774910	44921410	22747070	20409550	14836430	0.097	0.5645	0.904271	0.596343	0.88218
Slc43a3	1888275	1055309	3521852	3826585	1760055	2134193	2139977	1831092	3088771	2015555	2144234	2939004	3501301	3457526	2924496	3389708	5064871	2864699	2823291	2194819	2538815	4519658	3721760	932386	2624240	1948783	2999339	2154920	2430995	1837361	4944358	4003799	3239063	2465404	2267934	5194055	4946965	3726736	0.069	0.5271	0.920262	0.618922	0.881628
Kalrn	372215	1680570	488271	579299	1330558	938205	1231521	353695	997568	1460887	226416	401407	647042	1648466	179448	607279	952427	612486	475463	346046	725677	924767	439897	428253	647252	520497	236189	668989	262883	1114234	914192	651542	1480130	165750	206801	784476	368306	1288056	-0.209	-1.0474	0.506947	0.874992	0.276824
Ttc38	29758390	30522330	48634340	28566170	19804370	20905180	33040800	36323230	23291840	32252190	15206880	20580440	36555080	41121140	11664440	18465670	20384140	29267610	16550410	27234160	27405490	25563620	21478220	26365830	26481150	25727410	28838670	34257880	10673620	24050310	43678420	30823070	25840760	24663270	17417230	26818460	28383210	33873570	0	0.0026	1	0.830102	0.826578
Mipep	28925240	22285680	21595630	22429300	12896880	25791020	20166020	22183190	19800570	12291350	26323750	20231420	16974010	22958460	31333670	18076760	19048880	19503970	12729610	32608080	20683150	23567340	18828660	39520480	26421700	19178390	21338230	12344940	30056620	16345720	27062430	20051260	13403430	41679600	20448830	34570170	29340040	15391620	0.116	0.9294	0.642776	0.352943	0.873331
Dpy19l1	3889462	7639388	7096110	8539656	8191024	4600960	7240664	9152299	7252185	8064945	3163590	6277376	9987261	16915590	7657964	6462627	12516110	6189636	11012270	2410273	7279764	12228170	12397860	2025828	6020950	7114490	10766950	7932878	1609480	3551706	14069700	5286055	9604058	2078625	5899217	17161050	13371710	9519703	-0.157	-1.0262	0.526517	0.876567	0.288621
Itih4	69398120	91830700	64583640	92365520	142438200	141476800	156505100	126834400	120866800	160464300	23598800	47596200	72342430	159950400	75190340	77280280	119579800	111460000	117022900	48934350	71041940	115304600	81343290	67645110	86178710	134750100	127653400	90908870	15199190	101173500	93465150	87514020	91550430	19875620	70556880	146105400	153505800	111410100	-0.215	-1.4966	0.196264	0.847044	0.088523
Etnk2	106183	138700	53264.6	8530.04	42031.6	344688	239709	79103.1	133458	81861.7	880313	208804	100139	53154.4	292552	103609	99746.8	82662.2	56246.8	1393908	224145	112324	32967.7	203471	138856	87930	209493	111946	724747	217906	194696	194836	66226.3	58501.7	334790	231188	161654	68973.1	0.393	1.1886	0.415975	0.199538	0.859492
Pex10	35810110	32517590	44592170	52519860	41684230	50659550	39419810	40636230	45652580	44281140	33950460	32224510	46093540	71239870	50939050	49309350	45661700	40723770	36901800	33520830	35108600	55233340	62163670	28451830	37985010	43175150	49135060	41571430	21559170	33953590	48680390	50860530	51565810	41382030	32854720	52675550	46888550	51156230	-0.044	-0.5305	0.963074	0.892844	0.608658
Usp24	4728451	10442320	14165880	13130990	11777150	8051762	11438140	14573980	17297130	14645180	4987513	10809580	14535220	22687380	12036740	21928920	27038110	20332520	17901450	1634899	942770	12977350	13828990	3299567	10751940	10500250	18145130	16687070	4095591	12448170	20972400	27538150	15904150	7951757	11637430	21947590	13625630	23821300	-0.287	-1.1955	0.384335	0.864141	0.201656
Mmrn1	142316	78510.5	0	18003.6	28306.5	14054.9	22787.4	36166.7	41959.5	35406.1	23378.7	27764.3	0	66533.5	26826.2	10141.3	0	32620.3	10735.7	17756	79982.4	22197.3	10588.3	49738	5459.54	22666.5	127520	8885.44	0	45675.7	41351.9	28685.6	11584	29226	27607	22299.5	0	0	-0.14	-0.4494	0.993963	0.888732	0.657909
Cad	1830529	1450829	1669004	3352503	2194976	914404	2698043	2917534	1418464	1265725	1451738	1930409	2417968	2113428	2685028	3110839	870578	3876718	3879686	1695484	3235114	3655781	2459902	2556929	1685088	2659835	3862282	1211666	1016504	4570363	2619501	1486446	3491267	3151685	2026702	6235549	4051674	3300223	0.244	1.4925	0.198432	0.078435	0.845979
Abcc3	93599990	116557100	108291300	89871080	103782900	112696200	125865600	91105610	96135530	109593200	59901100	108655700	127250100	225443600	106436400	128212200	87790610	125642200	114846000	97391080	93383710	82274560	98501320	73309290	93622710	77927750	120077600	91572750	97522590	98253970	131766300	114493200	118197200	66570560	82152340	145162000	145190000	189252800	-0.08	-1.0602	0.495359	0.874036	0.269827
Trappc11	62337690	52481530	79883350	49727610	35519630	47186430	37703580	58241250	44629400	42019900	44854880	50259550	74507830	62152620	60185500	71643290	55239470	55166190	44725150	51612990	41685740	53437090	38410650	41127920	30507820	52793610	48454670	35737800	62180530	35185510	65506760	60144750	32588930	47559840	71773040	74815730	61726690	41050590	-0.109	-1.2038	0.378199	0.863563	0.197818
Plxnb2	54485920	85914650	115825600	73461090	95098720	49819090	74935100	83897490	60129230	88799990	51976090	84422620	105769600	225347500	53065880	73678950	72670260	94316860	68463970	48525960	72974010	68931920	67449990	42086390	50450960	60790390	67926740	58545530	65700590	80435540	104557200	101424900	110739800	48034350	47862730	102457500	136226700	128772200	-0.112	-1.135	0.43136	0.868479	0.23083
Xpnpep3	9375726	5766647	5732608	3827698	1913138	8214954	3346380	4275258	3949749	2363988	4262809	4194868	5379920	2871144	7890305	4409043	5004375	5100514	4985586	7683525	4974869	3087557	2819094	9926641	4557565	4146216	4096833	2289221	9182838	5226434	7576896	3684763	2025005	9683312	6145808	7063524	6773593	3150218	0.061	0.3538	0.975277	0.711152	0.874074
Osbpl8	4958542	6160752	7666360	9376302	7618138	3643995	5316572	9998320	8912134	8370170	3336254	8107045	13130760	16519110	6303061	4110832	11173460	8098371	11076170	4374498	8321704	12988680	10736530	5693223	6216292	11513270	11796460	9256959	10532240	8714200	16611990	11763990	10824650	5467529	4666995	18914860	9663397	13539240	0.211	1.7331	0.082819	0.030246	0.838824
Hist1h2ac	195119800	166051400	196899600	238432300	54668260	101140600	96996880	194922400	70613450	151849300	67649870	46437940	158813600	99388120	37470500	86807290	81986360	91557970	55128530	356384600	119746400	269403800	57017680	187360200	117272900	174645300	144341600	191719900	268896100	49008930	192834600	94560120	53706660	32284960	79774050	130514500	125909800	134266800	0.156	0.9172	0.653844	0.36098	0.873929
Hist1h2ad	195119800	166051400	196899600	238432300	54668260	101140600	96996880	194922400	70613450	151849300	67649870	46437940	158813600	99388120	37470500	86807290	81986360	91557970	55128530	356384600	119746400	269403800	57017680	187360200	117272900	174645300	144341600	191719900	268896100	49008930	192834600	94560120	53706660	32284960	79774050	130514500	125909800	134266800	0.153	0.959	0.61584	0.333678	0.871835
Hist1h2ae	195119800	166051400	196899600	238432300	54668260	101140600	96996880	194922400	70613450	151849300	67649870	46437940	158813600	99388120	37470500	86807290	81986360	91557970	55128530	356384600	119746400	269403800	57017680	187360200	117272900	174645300	144341600	191719900	268896100	49008930	192834600	94560120	53706660	32284960	79774050	130514500	125909800	134266800	0.161	0.9429	0.630498	0.344113	0.872656
Hist1h2ag	195119800	166051400	196899600	238432300	54668260	101140600	96996880	194922400	70613450	151849300	67649870	46437940	158813600	99388120	37470500	86807290	81986360	91557970	55128530	356384600	119746400	269403800	57017680	187360200	117272900	174645300	144341600	191719900	268896100	49008930	192834600	94560120	53706660	32284960	79774050	130514500	125909800	134266800	0.163	0.9434	0.630043	0.343788	0.872631
Hist1h2ai	195119800	166051400	196899600	238432300	54668260	101140600	96996880	194922400	70613450	151849300	67649870	46437940	158813600	99388120	37470500	86807290	81986360	91557970	55128530	356384600	119746400	269403800	57017680	187360200	117272900	174645300	144341600	191719900	268896100	49008930	192834600	94560120	53706660	32284960	79774050	130514500	125909800	134266800	0.177	1.038	0.544526	0.284183	0.867627
Hist1h2an	195119800	166051400	196899600	238432300	54668260	101140600	96996880	194922400	70613450	151849300	67649870	46437940	158813600	99388120	37470500	86807290	81986360	91557970	55128530	356384600	119746400	269403800	57017680	187360200	117272900	174645300	144341600	191719900	268896100	49008930	192834600	94560120	53706660	32284960	79774050	130514500	125909800	134266800	0.146	0.8615	0.703621	0.398271	0.876485
Hist1h2ao	195119800	166051400	196899600	238432300	54668260	101140600	96996880	194922400	70613450	151849300	67649870	46437940	158813600	99388120	37470500	86807290	81986360	91557970	55128530	356384600	119746400	269403800	57017680	187360200	117272900	174645300	144341600	191719900	268896100	49008930	192834600	94560120	53706660	32284960	79774050	130514500	125909800	134266800	0.149	0.8862	0.681749	0.381626	0.87539
Hist1h2ap	195119800	166051400	196899600	238432300	54668260	101140600	96996880	194922400	70613450	151849300	67649870	46437940	158813600	99388120	37470500	86807290	81986360	91557970	55128530	356384600	119746400	269403800	57017680	187360200	117272900	174645300	144341600	191719900	268896100	49008930	192834600	94560120	53706660	32284960	79774050	130514500	125909800	134266800	0.167	0.9914	0.586403	0.313016	0.870138
Rnaset2b	14116930	10125830	28121810	17022890	18276730	12223870	9838556	21871140	8755910	11101330	18009170	21441910	33110350	33778900	32962940	33083530	36616620	38235480	30717900	10767020	11256480	15532800	23689350	11418140	13574740	12785690	18419840	9072021	24202840	26343730	40716670	39439040	20956820	38055390	33646170	47990860	31966000	30309570	0.052	0.2882	0.988246	0.740333	0.86872
Pdia2	137706100	39315000	19520310	7658813	15233400	12835330	10507320	11604650	12669160	7502887	7049222	39676830	73439080	5613130	43011070	6392949	23977360	12963250	18439840	6206751	7547926	14620580	14015830	5070146	14667660	8652686	10587330	18222630	7559014	23743590	14645630	15380580	17515340	7098619	5503394	9979741	19029420	23093700	-0.413	-1.8093	0.070586	0.83694	0.028149
Gls	68779210	46958460	34003990	34942470	19719640	53151830	24823640	27574880	20168880	16078780	44711450	39407870	22782860	41782510	54182620	47953620	34398320	45176640	25261080	71086570	35623520	45550490	26226840	80428740	32997590	26409120	29888810	18919240	86585500	42688090	27586080	38999300	14029380	64228510	54477660	53301150	47623590	19411910	0.096	0.5074	0.928033	0.63046	0.881198
Fga	337525800	391756000	204072200	212170500	388557800	418158300	636827500	331578200	323809200	450606200	46606910	267790100	116927300	396111500	103795900	161607200	125664500	206283100	133020200	204831900	364023600	192485900	138025800	270657300	289971100	403484900	373480200	223027400	72083960	416102900	144712200	178451500	287394200	36797460	119088400	114743400	299710300	209301900	-0.201	-1.0588	0.496618	0.874141	0.270587
Gcn1	2834886	4109727	4494529	4238927	2177489	2302688	3034796	3929972	4272466	6842820	4872595	2773371	3404254	3875927	13950570	1807753	4145406	2601356	2156760	3123406	2557656	5149774	4088501	2547488	2771234	4155048	5984693	4603552	6285438	2441618	6746932	2713896	3624105	15480420	3437057	4409677	5508890	2866177	0.123	0.7044	0.826799	0.505489	0.88149
Parp4	2451920	419110	1428418	2457583	832715	1379149	877670	876980	1160322	652671	261874	338291	1248560	969955	638700	688872	1734451	1576091	1325628	521198	1532933	1035506	1414616	196892	386447	1098946	1140766	3300494	1705627	488219	1230542	977165	1656722	722254	512776	1049820	1151062	1387055	-0.018	-0.0924	1	0.848609	0.804197
Ascc3	64624.3	363061	192292	551761	568074	419540	276316	385690	255544	637518	281697	58044.6	200832	470484	110262	237752	747917	80849.6	406561	384315	248740	617605	536166	499381	199883	361244	448478	383060	283783	384148	133267	330534	247760	47897.4	192390	631808	606184	649795	0.207	0.9258	0.646045	0.355309	0.873509
C2cd2	8093251	6036763	7918389	4990976	2699928	7654492	3949732	4228222	4525587	7183981	3580948	6449584	5649870	8360452	4206745	6315904	4690919	9144515	4226421	8952353	2826808	5283287	5391220	6181879	5720750	4766162	6770092	5609156	2889144	2099302	7692971	6692549	3551374	4363403	6946330	8015941	5778652	6912253	-0.064	-0.5731	0.939613	0.8941	0.58123
Pi4ka	12440400	15376520	22855950	12454220	12380810	8912114	12631610	12528020	13363650	20327680	8736329	10497350	17664130	38151570	10744890	17542290	18692030	19833070	17980070	12969700	13456630	12545080	18135620	8239479	14450430	13049970	10758770	10883320	11292300	14688710	20119580	19676730	16486550	10564030	16622140	23995610	20896360	23723240	-0.029	-0.2906	1	0.875388	0.737324
Apob	2510726000	1614334000	589130100	951418600	545418200	2358184000	3179860000	1034464000	2821825000	3511103000	148585100	334973200	811378600	901830400	302809600	525982300	742558000	549475400	758198100	1130236000	833286800	1234255000	795418500	3127390000	2797627000	2634615000	3228110000	2194706000	131856600	435365500	819391100	761164100	726763300	141040100	382065700	942626200	743424400	847907600	-0.022	-0.0809	1	0.846598	0.807192
Acacb	29559940	47733780	29126020	23771030	17291870	21847260	21699040	25655310	18301430	52857410	13409850	15094280	24302960	26628800	10166750	26110650	25815890	22703380	17000070	38628540	26957330	24464430	21865900	36133650	25282170	42091840	30665260	33803420	10189690	35102660	28896710	26067940	20115780	16200270	33031550	26274860	21585390	26101620	0.116	1.2763	0.346572	0.157297	0.855081
Rnf213	37501410	28864460	22882090	33688820	16817960	31027950	22202610	27633130	18337740	22115580	26979040	27098110	27051320	30854930	35718930	28634440	27992180	27101360	25990580	26229550	27988460	41661530	26336440	35650090	24981600	23341420	37409950	21793740	39235560	21108070	30802700	28784040	15784690	36734160	30315260	44763220	30662400	16659690	0.043	0.4714	0.941173	0.650873	0.880147
Dsp	4751839	3080253	3545433	3906955	1249982	2032065	1825904	3604640	2439694	2739280	3512433	2800352	2168101	1774983	1944199	2839983	1955459	1655599	1494698	9510739	1623932	4521137	2603567	2259325	1618562	2215668	2191214	2689053	8239533	3041234	3765679	1538591	1785526	3005903	2975839	2931231	2615854	1228312	0.083	0.5007	0.93058	0.634325	0.881029
Myo1e	2808022	2799615	2618046	1254149	1543137	1616161	1000543	2921473	1566201	2258278	963264	1812496	1903435	2448670	1783344	1983597	2282317	913624	2517166	2625075	1789608	3458361	1668341	2898151	1577428	2091002	3142011	2784556	400284	1392614	2296648	2248012	1357483	1692888	1815668	4226221	2020951	2336253	0.061	0.5137	0.925595	0.626798	0.881346
Ube4a	833636	612161	623688	379974	194211	537122	430456	764353	618596	1644336	128573	621774	346918	582065	200026	17954720	945571	407209	225843	537688	494676	1312469	588802	743101	277669	1048493	1221646	1247359	99376.3	139759	305976	525581	92644.6	214705	139672	566411	111462	765339	-0.393	-1.417	0.240351	0.850765	0.113054
Helz2	960571	2133923	2749706	2223506	2365837	1128363	842920	2598033	2105669	1551675	831380	2270273	2508574	4579420	1552390	1831003	2700503	1956830	2089304	1337215	968669	2100487	1864569	791503	963459	1596814	1550944	1400442	982912	2036099	3482920	2314167	1908720	1471917	1651563	4843132	2123655	2679930	-0.102	-0.7392	0.80881	0.893227	0.46957
Sec16a	943561	812836	718015	318506	609553	592974	657312	425678	564513	958697	469744	519665	893482	491215	309463	836980	452796	346264	358256	743109	536932	636125	766425	550951	454556	662393	1353652	760299	461248	347676	970768	353984	337385	114149	794341	485448	878637	481614	-0.031	-0.2347	1	0.869167	0.759412
Farp1	8687565	7767013	9910741	6052001	6062842	5714535	6426723	9055701	6012903	7705169	6393946	9518584	9592950	13619270	7412140	8186996	7731550	5273313	5373887	7763867	8329026	7058283	5845259	4296170	5145501	5073236	6647788	5903170	8784895	7024491	10619460	5852715	10168550	4320517	5957957	8476302	10080550	8782455	-0.08	-0.8466	0.704125	0.888558	0.398084
Aox3	80563160	52644790	95132140	56639260	72455630	46541970	79110720	99245270	45601130	73381130	32399660	49094720	101805600	81680510	26045400	58979800	48704400	39007910	42259710	42745830	33005310	66846840	53927540	43890570	43524840	60803870	51326310	66802230	20154540	38680190	115972000	67001510	47579420	38542920	21737310	80032240	71976960	97541010	-0.148	-1.4442	0.22487	0.849432	0.104223
Atp2b1	11741870	15721250	18706630	10031180	15267700	8468377	12292550	17510440	10161640	11417570	7279676	13483090	18729650	26964970	12718960	12906780	14565620	13289130	17646720	9273001	12796910	15500310	12343010	7443130	9817439	11900430	12565440	9686236	15629730	14758770	20325600	11403450	14527100	6069322	10539650	26547760	19336350	16531340	-0.068	-0.6399	0.893591	0.894815	0.536829
Poglut3	916132	2087646	3378502	4564631	2660627	2304081	2993509	3300585	2978582	3603658	1590860	1301062	2799980	3631474	746813	2127885	2267110	2245005	2447447	1430045	1410342	4369497	3690367	1957440	2378908	2618785	3246604	3405488	2050848	2340381	3493629	2989958	2580938	531472	890295	2639897	2449563	3679257	-0.016	-0.1352	1	0.855598	0.792287
Ank3	1808863	4836293	8729934	2941506	2432015	1860183	8500357	7298780	3282829	2592867	2177350	6026035	3372939	7401210	2813546	2869253	5185935	4552569	3672444	2467140	6909074	6064186	1072364	2431332	1942824	5264612	3538371	1449016	4252726	10413230	6595630	5496166	2774083	1380476	2915231	5911563	4808997	3686487	-0.1	-0.6277	0.902765	0.894796	0.545029
Hk2	30693120	53597800	52837690	56172050	32337720	29116420	29219100	47386680	24739290	42120920	19828610	28683650	37172670	45505350	25966900	33084730	24760140	45864540	39383260	37307280	35365800	62517680	57487690	29735920	31554210	45313750	56079250	34160750	16414140	32877990	33110310	37694890	28484930	23125840	31632740	56496220	54933250	31070670	0.024	0.3125	0.98398	0.729902	0.870878
Capn2	3372794	9368327	6074362	2713634	2945080	1233048	5595483	7348828	1671372	2655805	2449749	2023711	4229002	5717937	2912880	2073182	2892499	1824325	2783557	6012263	2481470	4792225	6563764	3882320	2290054	7108485	4056749	1599270	2306344	5544406	3569086	6520960	885618	3051720	2645096	7899285	3568780	3427857	0.106	0.6482	0.861619	0.54299	0.882254
Sec22b	33160040	52267320	39777020	40599570	27405100	31660990	44853890	63618320	42600770	55602800	13508320	24970740	32426280	50024970	21185250	15525860	29064620	15337040	23617930	28551400	55202060	60340070	45840180	24077580	37716790	58786370	65717760	52404950	11273610	24726230	34538190	28728280	38327280	8353249	12170250	39748210	26496340	24503380	-0.026	-0.2097	1	0.866078	0.768409
Dpysl2	17699420	14160240	15226500	16134180	8392826	10500740	13797660	8970516	10156900	14492440	10059950	13119220	15201010	25267460	8475577	12539560	9432712	7643784	11274020	14146700	9839291	13427100	11210790	9589380	10488510	15730550	15914260	10788780	8106395	8982343	12263930	8659510	12675860	7951312	9056407	17601890	13921430	14223130	-0.072	-1.0043	0.547191	0.87818	0.301075
Lgals9	925629800	876954300	728791300	318705400	189926400	560173400	547238100	505666400	626315200	825609600	280476800	344184100	296998000	586396500	216726800	273078100	212773300	303793400	47456560	593932300	490536100	333840200	360437100	875584200	652318700	690653300	961204400	839319500	264798500	361006600	420905500	363664100	464542600	227516400	286608900	192146800	102067200	315736500	0.029	0.1544	1	0.789737	0.852969
Emd	384714	1694710	432998	831980	192606	479175	1153755	1083173	1134992	1139751	185867	152923	78411.3	299497	122380	99637.4	318346	206147	158322	697584	1996227	1346040	243902	902343	1533412	1350742	2001136	1256362	57200.7	180606	53770.6	193227	487329	71331.5	192448	48652.8	50759.7	180608	-0.098	-0.2629	1	0.872419	0.74862
Gtpbp1	3182340	4329259	1398813	2297554	1092126	1720984	2543154	1636104	1620114	1761254	881961	1550825	1303339	2629564	911638	803235	972821	849334	1256445	2863328	3281139	2008272	1544432	3879635	1999292	1409588	2380677	2830784	1240009	1520284	1806301	979368	1461222	631012	669475	1673638	2257108	1740068	0.078	0.5912	0.891765	0.579717	0.882371
Clta	9746265	8413466	14131770	7155398	5210488	6960538	6252173	12157320	6687385	11468100	4516553	6206342	5936298	8763161	2820626	5116050	3136561	4268401	3199588	9446330	9315432	8146699	7014525	5719092	7666393	8491094	6423584	8919074	6548453	6911555	8333591	4897649	7458059	2822959	4654218	3829514	3290891	4641760	-0.033	-0.2853	1	0.874836	0.73954
Stxbp1	670188	677571	627182	907272	723496	435015	538224	865509	772349	709793	477984	740924	678738	1223397	556622	438565	525413	72827.9	618264	1087985	962897	1334556	803639	909109	645997	1029881	874812	857730	685994	557075	921555	828042	571137	701902	521214	764784	638056	560562	0.279	2.0388	0.019238	0.007728	0.832881
Endog	103163700	75448030	68948950	57291160	18458680	56822450	55931300	57231940	49721060	39719150	31387590	43244040	47369410	38834500	30484150	39354210	38075080	44929010	20068000	119984300	80922030	53149380	30488240	107059900	62682090	55842510	79159110	38685590	43511460	37340020	73923580	40282580	27564500	29679560	44020340	52706270	48831730	27960480	0.106	0.8527	0.711307	0.404235	0.876859
Mttp	1098290000	2236836000	2958634000	2313047000	2442409000	1650480000	1937122000	2801149000	2702185000	3060310000	1103706000	1697265000	3277178000	4628869000	2467958000	3053651000	4292454000	3068277000	4079941000	1125054000	1951712000	2876114000	2851932000	1208577000	1927376000	2710505000	3521086000	2956043000	813380200	2614255000	3529416000	4240347000	3203163000	1272638000	2862297000	5701875000	4413848000	4338795000	-0.02	-0.1261	1	0.854175	0.794924
Myh11	230082800	578063200	447904100	449698700	288644600	120540200	596816400	481179600	99658240	210219900	260731800	300147700	262373300	52542300	182173300	200226800	239065100	53493620	226274300	520187400	468264500	308606900	424418500	394145300	507269000	516703700	605321700	203588400	25263390	393541700	335487800	257507800	258530500	138486400	167535800	254006200	253430700	300116000	0.195	0.8769	0.690031	0.387875	0.87581
Metap2	487232	1043858	1809839	1159456	1587327	467489	581002	2412942	608572	1194230	385826	926269	1627254	1879815	509716	915186	2086894	821768	1491865	623098	1001415	1830611	1312557	490711	1012452	1457716	1598085	1344592	519592	1079873	2689233	1566764	1721226	196345	506707	3319913	2614151	2572148	0.143	0.8713	0.694992	0.391648	0.876059
Kng1	26941300	75492520	42603670	43510510	31336830	24805630	66555730	42043760	38638810	47930200	6500729	30731560	19269550	56986890	7319380	18777970	10707520	25699520	14339300	22942660	61763570	27482570	20685100	30084710	38517330	58816450	49539820	41612570	5480661	37013760	18693570	24525450	37196150	3929644	9934710	10500230	20113310	18438990	-0.189	-0.9687	0.581658	0.880748	0.321888
Arg2	682815	101691	637005	257976	149994	425300	265210	296085	38173.9	34070.2	191181	363023	450878	682226	346158	186940	244786	259944	225280	634116	114443	93573.9	206862	202295	298834	390647	243528	173496	40643370	271968	372078	192736	54766.9	226638	369994	267583	222908	367328	0.23	0.6165	0.878992	0.563608	0.882405
Ngp	51228180	54321050	60951260	50501390	40987090	47956200	68646650	89462410	15354520	69680010	2900554	16739300	4733572	7833971	8629878	3686147	3107862	5053312	4488079	104682200	87083840	41511860	28635920	31930390	46222820	19653130	19260710	21246070	9062534	14446330	4074184	8578524	25593750	1594217	4690358	2619473	22903930	4330747	-0.141	-0.3812	1	0.883713	0.695191
Slc10a1	47767280	126212400	117088100	43439100	81074810	72439800	74647360	71340450	74221570	92163930	43518770	92897440	69418850	184471100	50248740	61859870	60157690	80894930	31634760	48255470	117558800	45886910	43711380	63821000	68288000	64279090	70976220	52606950	30525980	102666500	86767840	76128200	96520410	53687090	85405370	43040590	66495470	80358830	-0.107	-0.8354	0.715369	0.889161	0.405389
Prdx6	811574600	874836600	1212810000	744510800	291236500	619395900	833802900	698848800	514464300	926793200	380927200	518342400	539979200	711213900	212603300	470984900	259510500	411385700	156262000	735154800	669540800	542616800	460225400	622141300	619687100	698959300	783660300	906297200	342610400	470200600	717685500	476148000	506113000	354867300	309694400	220774200	436967900	483554400	-0.03	-0.2324	1	0.868891	0.760262
Akap1	9748897	14220910	4088075	6454089	1789974	10537130	11551130	4953873	6943508	9097856	1236782	3412558	3759838	4894746	3101331	3887046	3440885	3714497	2425591	9115694	12502430	4972717	2534148	8509845	6620996	7490055	7825202	10057530	2022623	6757815	8771758	3413638	3933196	2052729	2687414	6022411	3186109	5130631	0.09	0.5658	0.903684	0.595543	0.882193
Bak1	17691830	20477970	18913530	37100340	21541260	17158330	11967500	18637070	11157270	13478870	23370790	22853720	33970850	21939350	31383660	25628140	35558690	28244780	48254300	20801140	13515470	64816710	35812070	13890060	15735510	13902840	24473940	14930530	20578920	19432380	23694740	22843580	13714260	30054500	19539550	61851930	53612630	18069420	0.039	0.2655	0.991647	0.749673	0.866514
Casp6	325941	1094597	1260210	1766498	787542	909731	1153588	704800	1254037	2167287	373693	208146	1484905	1774778	110182	851223	1125171	1034113	503864	875079	949468	1455793	1325908	352903	1304897	684131	894071	1669376	263779	722400	2102199	1295841	1071514	300514	146605	946884	1074725	1169178	0.021	0.1055	1	0.804417	0.845543
Dld	1306547000	779234800	619106300	504100900	246947100	907757100	519195700	523072800	404291100	294286900	682375600	674700600	463896300	449201300	694008600	657906000	387603300	528004000	301091000	1059595000	619970200	542421400	364712500	1110723000	579222000	472653000	588871400	379692900	1504020000	535435700	493264600	437160800	234249400	767715800	622760500	493551700	499276800	263863900	-0.016	-0.1211	1	0.85338	0.796348
Hsd17b10	1717726000	1033483000	666950800	697557900	166245500	1323213000	722951100	543514800	632885100	448737000	820527300	541433700	296998000	261798300	414213900	371792900	223762700	335289700	132257700	1629378000	956788400	542221400	370229400	1654207000	874792400	591989600	961514700	489850400	902809200	461197600	828965000	266945800	197165700	282754400	525075200	241099600	209028600	134289800	0.006	0.0292	1	0.824078	0.831958
Dctn1	15245320	3484504	8179475	1502025	4749456	6697481	4152125	10402680	1018464	357091	8562160	5292902	8492185	9084461	13445010	7572779	6616519	2487835	2932087	11962820	5948630	6197674	1126387	12542650	7890738	2796776	4256126	1570189	12007050	10994400	10897530	6362195	5816743	11238260	9179169	17341460	7566579	4714754	0.342	1.1576	0.441489	0.215781	0.861128
Prkcsh	135794500	296275600	390082900	244338500	193146000	179043800	255946800	362639400	255792900	272536600	63340920	167877200	250816400	307270700	130173000	224874500	215403600	225895500	235002700	130954600	295737400	293254100	185155300	160242500	273973100	400574300	361758900	285510300	83016180	189210400	284682000	274363200	221982700	68298500	152000100	320550600	256561900	252977500	-0.024	-0.2314	1	0.868771	0.76063
Serpinb8	1047406	201002	201868	435781	869822	772390	1302870	1024777	671525	583452	709245	1256880	995795	613280	1066297	775629	849783	1061303	672488	972826	995111	383553	676522	1018983	1021144	466167	820216	238195	718910	1268341	257378	974133	1221832	1061183	40908.6	820064	804977	610645	-0.119	-0.4644	0.989601	0.889658	0.649149
Prdx4	97236160	156220100	268364600	159315500	175344300	109471900	134444200	292082500	171067600	175148800	78288370	143000100	287852100	378026500	199614000	255151600	334429400	189704300	299072600	82621360	125049000	215549800	150845600	104578800	169347500	243500200	216279900	196786300	60401710	162768600	268084800	276295500	182668800	80001580	165762800	516356600	325362300	274734600	-0.086	-0.6799	0.861417	0.894536	0.509784
Diaph1	992952	783073	1174628	821411	689636	425572	144165	1639164	388331	1064894	375078	311741	859976	1290355	420773	500447	934429	739100	729395	625262	839453	1024823	877718	1763394	741400	1382331	1232997	732309	153580	499032	766987	640060	406148	489377	458967	1355427	1401442	1248351	0.139	0.9289	0.643231	0.353271	0.873356
Galnt4	398660	1707255	3338633	2779980	1430827	685665	2261263	2415723	1902589	793841	895308	1125390	2568770	2667662	1331517	1701624	2437434	2157409	2081309	923378	3048934	1780851	1508595	1881892	973241	2645718	951209	1637328	1313194	1398953	2181859	2068628	694895	629826	1548791	2033362	2706612	1835883	-0.086	-0.5518	0.951954	0.893551	0.595053
Galnt1	473444	2454986	3799127	5217782	5248475	1652243	3486582	5339099	3412154	3235949	1223150	2109508	10416270	10824170	3538709	4706184	14457270	6468732	13233120	989619	2283450	5815856	4637848	1233994	1697517	4487158	7736968	2477678	1276167	2540860	8934285	6645197	5729355	1381221	3467680	21390140	10761360	7625092	-0.073	-0.2769	1	0.873946	0.742999
Faah	142090500	224478300	274312000	203594700	179664100	166597800	152297400	253488500	199236900	199362100	124154600	176734400	261796600	435572100	246010700	298404200	387499500	295236500	277528700	159850600	177395800	262740500	210335800	150463800	173246200	217237100	267196800	209097900	118592300	248331600	332779600	407475700	238217700	191714000	246301000	571712100	368152400	346585300	0.044	0.4299	0.95473	0.673287	0.878486
Flot1	32727550	41412160	51759910	25829470	28890110	26712670	29430760	34901020	22691970	27159290	23445240	36340740	36752600	80791170	36827490	45538190	34110680	43703310	29892520	35393420	29803190	34292690	26240810	29614390	28474230	31174070	28985870	23702150	33539090	40984570	47016080	45582460	32237570	26578620	29819980	39691250	52299580	41357140	-0.024	-0.3123	1	0.877567	0.727973
Slc22a1	65450610	68187980	73800960	65009070	69906680	64247830	74577890	82094900	73477710	72322500	28486370	73157000	101272000	149659100	52940470	61046230	68641600	78119130	72600800	52459640	61650630	67921220	61879100	47089650	45288230	64008020	70222080	53051200	65111150	77466830	92031160	58866590	74793140	47360520	57170450	97384450	89952820	124125100	-0.079	-1.0633	0.492579	0.873805	0.268146
Atox1	2895505	4571237	2459937	4050843	979900	2917889	3307125	2960197	1652312	3151809	586010	1143587	751058	616818	815071	1263518	532925	602258	355204	3390591	2962805	1422699	2623903	2922500	2556620	2422828	2542654	3177968	1179745	773522	349702	294958	1481347	617846	165077	554832	621006	502300	-0.227	-0.8913	0.65901	0.885933	0.369404
Degs1	539407	875771	1656875	1149869	1101418	429630	741370	1367367	864026	731786	309134	748039	1408613	1942003	646334	1094674	1462371	1381230	1476926	810446	892978	1778274	1380864	377331	807717	954188	1135231	1029481	310075	570288	1084356	984990	1002338	267862	629988	2601733	1588882	1378429	-0.091	-0.6949	0.848608	0.894302	0.499607
Pex5	156308700	165075200	188861800	149877800	135585300	139039400	162382700	182410300	125265800	158514000	119993300	134559100	192187300	264983400	158050000	205696400	171034100	188641300	130578400	139361300	132455300	163586700	165966400	118954600	96150310	155237300	182382200	142007200	114610900	151574100	201487400	190629200	171864300	150545800	136192300	200651100	178315900	201914400	-0.085	-1.5416	0.173109	0.845173	0.076419
Napsa	55345400	44826320	54862720	56307040	66895080	57030650	30893300	46075070	44541870	39804200	76878370	61323880	85220650	165121600	145953700	174590900	148459500	179697600	121183500	73285550	33736570	60816760	75684320	62609390	45242760	30973360	47029820	34990490	604303000	118024700	95146870	175425200	81186160	146963500	154007200	166165600	132759300	126865600	0.16	0.6941	0.833575	0.512436	0.881675
Snap23	26769190	40325380	61456730	32975030	41129320	26002250	34650960	55766720	29895670	39951440	19118360	37221930	54932520	80414170	28294010	34003990	37951160	37168590	41421070	24859760	38959970	44265000	30183410	25600190	28356050	38341680	41025000	28829520	29555080	34040450	47003490	38564220	40140770	19508620	24778090	57486050	49150440	47595410	-0.095	-1.3575	0.275669	0.853916	0.133976
Psmb1	22713350	36614850	46778040	30971280	18222570	17653180	34184200	44180610	19288280	44992640	9299255	19759370	21573330	23170700	5728638	8800370	9140168	14200640	6270253	19813480	27826890	32383270	20526300	20582720	26532060	28907270	32933670	40309440	9189273	10623350	30916610	14325090	16962670	6002105	5414171	10255970	19461610	21527090	-0.054	-0.3251	1	0.878796	0.722244
Ndufb11	93643160	100671600	58928990	70460800	47427180	104745200	65935520	82631880	74482640	51655110	107468600	105332600	89751660	93041370	157573100	82125100	86984080	94965580	71307640	107574300	108600600	116387000	64382780	117255900	89174000	65299730	95384310	39961800	206468900	89619120	85980520	91037820	48036880	149579900	102928400	134650400	105398600	52557990	0.072	0.5051	0.928913	0.63179	0.881141
Sypl1	9702617	9203904	7660327	4088762	5119472	6824513	6624261	7448722	4582609	4655720	4264228	5637112	6691535	16285360	5541290	9910284	10733150	9481920	5359898	7183500	7389851	6601832	4778139	6896311	5928430	6307824	6017057	4443275	18889580	9020185	12917020	11718410	4159498	4144619	5748997	11551670	7527410	8665721	0.055	0.4089	0.960962	0.68416	0.877451
Gsto1	17284810	17758850	9804114	10326090	1215129	9424895	13907150	9923296	7234116	14305620	1258935	3358774	1595601	4474185	1129834	1713471	2136634	2078018	1168890	12133080	8918144	5532779	3887673	9686544	9310759	9083284	11050870	15853120	1537978	2494205	3771638	3935741	3341801	1414759	1374315	1200776	2762121	2439000	-0.036	-0.1335	1	0.855335	0.792784
Cyp3a25	45585510	94991550	124691200	62186340	53614810	56552950	80467250	93120680	99735960	121871000	44364310	59765380	111063700	219463300	82191580	103224000	111760000	161902100	98691530	38263920	86443770	79645320	122273100	37214450	97340410	70882690	185046400	103590700	28096840	56842170	168359400	190096700	159715600	45627320	120434600	168662400	150958200	158981800	0.056	0.3953	0.964772	0.69103	0.876708
Man2b1	80372680	76875500	209176900	94930660	170242700	98316880	77716110	182226900	70869530	63530090	258664000	218645600	284271600	417660000	515079200	463552100	409207200	441413900	344248400	64430790	70782130	125783800	171017600	83748300	80190220	91487020	114903000	52808800	239549600	434524100	270923100	412239400	214497300	505100400	476085300	517156600	401692100	398467000	-0.027	-0.1001	1	0.849923	0.802145
Sod3	5565722	8457830	4020632	6820662	4830291	2708381	10462310	6269606	5231273	10828240	1059561	3906453	3299748	8485698	1517449	3025335	1543269	3929514	3705747	4186761	6112691	6887609	4757540	5743798	5774244	7086206	7150011	6164853	1349765	2736992	1949528	2744449	6553668	869570	471742	2895085	4099586	4577294	-0.201	-1.125	0.439538	0.869214	0.235856
Rpl21	20276060	89350700	112121600	114240600	127194500	32261510	86069870	135999200	109886400	133987000	17694200	71253790	128790300	308436900	29447310	78281500	155296700	129285100	113212900	28662650	94424000	158340700	157749000	30165520	73338760	129281700	203880500	184829500	16973400	87325610	188536900	157954900	175046200	11050210	42532950	176831900	165183600	147603600	0.041	0.1938	0.998762	0.776598	0.858302
Gclm	37479510	32588070	22508440	30944970	10666290	25488930	34295700	28143180	24258470	43547790	8018520	10262570	16703390	16489910	8052275	11092240	10846090	11956820	9929977	29904870	24619720	37709790	19997570	27313690	25834350	28823540	32966230	39170050	6050865	10997590	20330890	11365720	9643418	6790907	7983180	18030120	16565700	13340600	-0.029	-0.193	1	0.8639	0.774134
Hgd	506526600	586030900	788472800	514893700	490068800	365668400	435186800	662424600	406448000	760457400	209782300	334422000	531451800	1102035000	172074200	474369700	509052200	559897900	692278000	480716000	416998400	561631700	554571500	410845900	436326400	495528200	745528400	653228900	193138000	418965300	786610200	776651800	639512600	342661600	397695100	601905900	846984600	834587000	0.048	0.4729	0.940652	0.65004	0.880198
Amacr	1900303000	2372785000	3254609000	3437166000	1771898000	2073217000	2311437000	2565157000	2305481000	2238925000	1722538000	1830358000	2137427000	2120606000	1432673000	2103279000	1531469000	1921738000	1580170000	1802315000	1793535000	2831782000	2391124000	1700388000	2048512000	2623998000	2400562000	1797426000	1656835000	1979131000	2807473000	1923360000	1937203000	1683520000	2124651000	2127686000	2033516000	1790815000	-0.067	-1.0295	0.523441	0.876323	0.286768
Kif1c	1415056	1923332	3069012	395055	681768	1379087	2217413	335244	589959	3146136	695112	1120454	3298828	797473	1107315	1056846	403352	946765	415345	471327	904510	1330772	1859098	1365057	96462.4	2517168	2020738	1577388	2200021	751087	823285	563219	953474	1180365	940608	1187982	333544	2658773	-0.04	-0.1582	1	0.85905	0.785362
Ptgis	3209884	4058540	3651080	1593105	3106408	1722173	1431583	2055754	1967526	3007589	1698525	1506857	3403372	4314307	921295	2011925	3985239	1880742	2661790	1563305	2701861	1930129	2254230	3341489	1579192	4509571	1508486	3212189	1242926	1107648	4186623	2639146	2493159	1103862	2011291	5749931	2863507	3247502	-0.025	-0.1932	1	0.863927	0.774067
Vps26c	2224864	814543	2091491	500547	869632	1881380	622765	2311117	458675	1239239	695411	678333	1622756	1867939	1770016	601428	2692172	2599463	2086798	1525863	578614	2540402	1128124	1030118	885704	1998515	1353873	974462	754464	950522	2671205	2297755	1997517	737939	582483	3534798	1962928	1827739	0.063	0.373	0.97063	0.702001	0.875362
Dpysl4	328779	146528	220949	84655.6	133579	219381	67161.5	201590	180968	202196	210378	338580	255164	380197	108744	261971	255503	26206.8	127096	247252	69564	86975.3	63019.7	48995.9	131956	258108	156645	87371.3	137499	66391.8	254398	114426	302025	60233.4	31811.8	234014	216007	283135	-0.329	-1.553	0.167473	0.844724	0.073552
Scarb2	97420170	89114000	155741300	102558100	143185200	151516200	100576500	164584400	93027070	69094680	131266100	171903500	206732500	269902400	299390000	297265500	317375600	248784600	262472900	82246650	72130990	118693900	138097400	120169900	102058700	130005100	128893300	75437840	128088300	207151500	192662700	254044700	145324300	257713200	250289300	435800700	283206100	295499800	-0.024	-0.1333	1	0.855304	0.792843
Phb2	3180042000	2236934000	2104536000	2132008000	1053458000	2877251000	1871764000	1701695000	2094876000	1595333000	2339533000	2370895000	2009492000	2134017000	2981893000	2363062000	2230700000	2236522000	1405037000	3418416000	2298949000	2487081000	1787495000	2930932000	2072374000	1635023000	3070677000	1738044000	2747714000	1927825000	2604176000	2181133000	1304331000	2891826000	2254549000	2744066000	2398012000	1403862000	0.03	0.4048	0.96213	0.686245	0.877233
Gosr2	5015019	9981484	8001098	10340430	7136944	4301159	7951783	12020020	10722750	12497530	3399903	4706773	8852634	13709170	6219938	5571690	7748078	6245326	7780328	6231216	7098339	13822340	14771870	3967896	6852195	11091040	17545270	13293000	2766735	7226067	14512040	7358953	11634540	3049443	4660297	11517030	10492510	8101092	0.093	0.8387	0.723397	0.413754	0.877433
Ddt	213868500	285045400	271857000	248948000	118568600	161459300	280148100	344206800	201607800	368484000	46190600	108187700	78776320	239343000	18457380	43104290	48835050	100979800	49233830	191052500	255705800	166487000	147710000	181492900	180767800	321098700	281549300	342290000	43319840	51525340	67892000	133145900	197018500	23708790	24590590	50973960	82328140	148432400	-0.121	-0.4943	0.979098	0.891283	0.63119
Psmd4	4936428	2493148	1136992	3188888	950691	2177491	4184412	1813580	1772694	4047708	1314688	2061189	1691604	2132766	868330	1738960	556989	1479073	376527	4333097	2152097	1624392	1460116	2966584	2351472	2136411	2694068	3796287	2569100	1463634	3325794	535642	302652	867762	836097	704814	476124	285920	-0.21	-0.9468	0.60329	0.88228	0.335029
Ptpn9	1512300	2783927	314495	941538	682604	1843597	2097392	445990	1166520	1739726	876952	960046	1289895	2078354	1591003	1101747	755757	257327	1180961	2756126	975991	1870903	2319185	3155999	1411067	1742890	2761897	1362690	583505	362406	2483659	1027204	577021	894518	1817248	1577204	1420088	841171	0.223	1.1803	0.422758	0.203822	0.859927
Exoc7	1847127	1978846	2696373	757228	985385	1584463	634575	767176	761424	1299969	1265758	2862960	564030	1089093	1541649	1007752	701778	911680	1011540	1458848	1268798	1401021	1026309	1897703	1347328	1047894	1890385	1190105	1819308	2182983	833948	884900	1061079	1099864	767312	990824	998230	1138725	0.051	0.3312	0.980262	0.721571	0.872398
Dhx15	2705293	2503269	3538421	2256268	2453989	2304241	3341849	4836686	1524699	2831374	2149620	3611410	4183434	5473204	3439960	2883671	3705963	2752956	4011117	538460	3043329	3406543	1890958	2504372	2550981	1903162	2035891	2327149	1820087	2722701	1763233	3575797	4012839	2968360	2671730	4535262	5080343	4540588	-0.175	-1.2092	0.374245	0.86319	0.195343
Purb	667901	1081313	2176495	769519	429322	983926	810024	1921614	598994	880508	165353	409034	538597	2421629	539893	670586	1601201	900680	444356	1258285	815511	730912	599406	795893	527635	1309050	700103	778577	504742	904683	1563612	1337061	1088817	218094	248960	1267540	1299050	1055955	0.02	0.1331	1	0.796347	0.849847
Nmi	1433839	1921886	2314863	1898195	1373721	1165574	536786	1854821	412330	1149629	878837	285777	1112629	1586728	469731	385663	661240	988067	361029	712197	893378	1041615	1505443	1528029	288902	1691845	705905	488693	558990	467450	1311729	774014	383487	1235767	266912	1140647	246854	887867	-0.228	-1.2054	0.377025	0.863452	0.197083
Slc6a6	1719369	5867114	2420637	4690018	6145430	1361015	4031834	1952807	1540843	849449	1286908	2488898	2242635	6472995	2081919	1079485	4201912	2348801	3516960	8591569	1737989	2507453	1131459	2644550	747540	1730808	3165189	2113305	6376076	5369552	4124422	3283153	1873228	2352763	2116709	11660880	4810354	5757980	0.165	0.804	0.752494	0.437467	0.878747
Srsf5	558616	196258	573649	280487	53919.7	114198	33476.4	254977	37671.2	293241	152666	144766	82399.4	207334	71637.4	126991	242289	55610.9	188406	204199	145690	183373	434608	148864	436289	108876	64082.2	274427	102456	104553	242586	133284	209976	160078	195096	181902	57218.5	218426	0.126	0.581	0.896656	0.586116	0.882317
Kpna6	693853	298924	285931	281515	375114	466450	297461	252633	156980	335306	169572	30022.6	149174	405162	108983	127041	45130.6	18187.6	55413.8	173840	320609	198556	99542.9	299081	106298	283784	289888	60448.6	307098	33926.5	242563	131635	84129.9	188191	139442	111701	120168	169459	-0.114	-0.4711	0.98746	0.890048	0.645181
Capn1	696162	730677	774060	492927	500160	861245	447434	736221	171950	421743	299144	325818	392000	194747	225125	819421	650464	361310	596568	488622	350443	326746	194482	864563	225236	147735	841936	319232	411459	360113	684492	577586	159804	778033	350997	1149021	440732	568778	-0.102	-0.5486	0.953703	0.893454	0.597112
Anp32a	6649255	16075440	18296230	8825295	30342900	6826776	26225090	16217760	18303740	22802330	2384580	8902960	14527100	53968170	3353957	7043922	32054670	18028460	17186560	5724514	12428940	11013850	20014550	7639362	13857580	16785090	30256770	15290800	2937214	30251950	14020510	9961787	30437560	3007078	8037127	37079450	28872320	32992700	-0.006	-0.0299	0.999987	0.836938	0.819503
Exoc4	5490762	7621174	2544109	2544332	1148470	1785612	1354878	10140350	5135703	5738849	2110594	1439214	2159767	13010720	968951	7419721	9566308	4507997	1373837	1051886	1189512	2358451	1573658	4454123	6070042	2384828	1681482	6959728	2101248	1303441	11010070	7223370	7407438	2758021	5034610	2904006	7902017	8894518	0.017	0.067	1	0.814801	0.839014
Phyh	875543900	784540100	868152000	661537900	201157100	734330300	677935200	610747900	583806200	639428300	266606000	384518300	197669000	327814300	207050000	230252600	157074900	234451600	116785400	546280000	658241300	441833800	415616100	625185700	719881000	814565200	643954300	516988600	250187600	421085800	573581900	240291400	319070200	159519600	258453900	167336600	207652000	178791900	-0.045	-0.2603	1	0.872129	0.749645
Hax1	4996305	3685949	2195660	3985221	2115796	4301749	3496254	3952400	3519127	3196544	3863652	2967294	2935238	2646226	2687099	1895442	2045184	2090671	1508514	5772184	4643453	4458811	2447746	5934076	4227590	4351796	5296721	3219834	3690877	2600925	3932415	2298051	1905137	2199132	2393679	2977656	3292984	1873909	0.13	1.0688	0.517317	0.265756	0.865944
Sult3a1	2722746	1784491	1537843	1327614	411733	2000932	1587041	1435269	652480	1674547	375332	1165543	542828	912892	604227	326508	875655	608912	318496	2654791	1166725	2164467	824634	1567433	769208	2035057	2054781	1383204	721776	131908	1409862	255678	269004	534802	452910	350020	715576	1142191	-0.098	-0.4401	0.996372	0.88812	0.663252
Pld3	19693240	20391520	43628620	29578640	36590780	17846700	17121470	43707110	14789980	13578430	37797170	40464020	59755210	60043070	77186910	72863850	73291910	56250680	87861490	16370530	14802390	41928380	34262360	11307960	17644860	28876760	20136860	13374340	48801290	55690170	50351180	51714300	29074640	66646400	64779930	124476400	74496710	47332810	-0.064	-0.2803	1	0.874309	0.741607
Agxt	5199727000	7176461000	7671715000	10409440000	3661328000	6035153000	7434228000	4756370000	6510994000	6682394000	3894179000	5414599000	4400657000	6413563000	3956672000	5641967000	4706127000	4547264000	3116976000	5504718000	6136624000	6819591000	5834397000	5144236000	7058415000	6716495000	8335558000	5682663000	2215289000	5078664000	6084388000	5865124000	5993538000	4197868000	4702780000	5211306000	5988946000	5048210000	-0.029	-0.3405	1	0.88022	0.715137
Dhodh	2782432	2177094	2207035	752949	439264	2024453	1245162	1468360	1038035	1155216	1107386	1715698	1050260	963768	829080	886140	677176	809508	592784	2800337	1744908	671462	680528	2524431	1583868	1262514	1184749	760422	2506000	1136139	929619	652690	327995	1127767	1014146	1087881	1035366	310693	-0.102	-0.532	0.962332	0.892899	0.607708
Ppt2	3566211	4153411	2938391	6047384	4515288	4906805	1925312	4528594	1071654	4458752	4219290	4800773	5549570	13017800	15748200	14904580	10717680	14725530	10738980	2597335	1151486	1852273	3341068	4432365	3129228	2318862	2401854	4728284	8305885	12768910	7944872	10180280	3900799	13036980	13263390	19756700	14970630	7306669	-0.019	-0.0714	1	0.844892	0.809604
Hpn	50641430	42997700	35028280	30868650	21541210	31961680	44699570	37885840	33200590	35918950	18660290	26392860	28753680	53788280	25166270	30094950	30116010	38290770	27517080	31628470	28284160	30123650	25760280	46234700	32538660	40053250	36822600	24855220	22134360	33874130	38539790	34908610	24389650	19089230	24625740	40385590	33039720	32918630	-0.08	-1.2774	0.326724	0.858681	0.165523
Ech1	969546100	796678800	1196008000	989304200	783775600	1069304000	917506800	895617700	979365600	779320300	877291300	775130300	925786300	1607137000	1224160000	1176324000	1198350000	1154245000	907519900	963184200	660630600	874583100	888323600	827713500	694475100	1015796000	1087679000	821894200	1012869000	788727300	1332362000	1184281000	936638300	1280664000	1053370000	1254685000	1204637000	1188510000	-0.031	-0.3819	1	0.88377	0.694833
Fkbp8	33568710	42832130	29329790	42039190	14321290	31161750	34774980	44040450	29009620	40434660	9208261	16210270	9046896	22589820	6069009	8279899	6692262	7196716	5023610	30379900	44212150	45017650	30599610	31255190	35158860	44473160	50540330	38040100	7941985	17101910	13654790	11396380	18605130	2260163	4371138	9163863	10401000	9883814	0.001	0.0059	1	0.829376	0.827265
Slc27a2	980034700	1886810000	2668122000	1798180000	2031168000	1334550000	1720093000	2204981000	2126220000	2231283000	818822700	1303120000	2141810000	4726976000	1728757000	2243137000	3282458000	2555122000	2804023000	1031843000	1746657000	2048886000	2000787000	949127300	1415520000	2222471000	2525146000	2392332000	1557013000	1873281000	2618437000	3173018000	2975137000	912211200	1771513000	3420631000	3177640000	3469783000	-0.025	-0.1889	1	0.863351	0.775505
Bhmt	2546512000	4150051000	4245471000	3755600000	1753489000	2142817000	2573750000	2992717000	3012239000	4385136000	1221923000	1934410000	1912036000	3688451000	903410100	1615090000	1143199000	2731573000	975397200	2648165000	3445774000	3246700000	4365143000	2695979000	2955900000	3537501000	5543158000	3616985000	1253762000	2544053000	2647554000	2721879000	2806832000	1261968000	2062695000	1138446000	2146740000	1869817000	0.086	0.676	0.845053	0.52457	0.881952
Psmd14	5998429	7222157	3934268	3789849	2455530	1780452	5946292	5037153	1355805	4095987	1473387	3342355	4120172	3975340	889634	930096	2473701	1797983	795817	5393808	2426529	5670484	1269130	4142708	2557364	3502501	2826293	4064770	1013373	1419696	5424536	2978323	717764	704408	243685	1023587	1581840	2853536	-0.272	-1.3683	0.269107	0.853319	0.130017
Adam10	7884797	14380090	12138490	17188090	12992030	8886007	10023020	16459940	10254790	10304550	7520900	12041840	15192160	23334100	10052980	14982930	17310490	14942400	17977810	9893542	10310110	18295380	14216880	6959422	10619140	13205870	14928040	10271340	15306910	10595390	12416870	15989630	11892600	5309659	7787558	25801240	21706360	16261020	-0.051	-0.5329	0.961883	0.892931	0.607137
Npc1	44345170	39170100	111663600	74079660	103172800	96471250	52231870	97321070	79297510	55631380	105029800	104417400	134130400	244686400	223212100	204514600	259217200	273733700	188628800	44265920	45761530	80976420	114597300	63951470	62670320	73516040	100795200	48857420	76401680	135094300	162780400	216228700	155822400	183023700	168919300	230317300	220013900	213661000	-0.029	-0.141	1	0.856488	0.790577
Scamp3	6656728	8043112	8423032	4959729	7002998	3462597	7941993	14014290	6603492	9551248	2745386	5856983	14057950	18278040	4758402	4996288	10974010	6523538	5738585	4696006	7077039	11523740	8392762	3828224	5670391	14269410	11809700	5528006	2496150	2237747	11749790	7335060	10029670	3471898	1587177	9680250	8268170	8446638	-0.139	-1.0197	0.532607	0.877048	0.292289
Anxa3	4142139	5508793	6504777	6039210	3217629	3058691	3286515	4850066	3688637	4090765	2403793	4753833	4521485	7189813	2835988	2854996	2918694	3739130	2857348	3808214	4373701	6410740	3545339	3726319	3247517	3258893	3068634	4687799	2934690	3358191	5280300	5066111	3973634	2209413	2999075	6183882	4248497	5444101	0.001	0.0116	1	0.828109	0.828438
Ap1b1	37890080	30396920	76452610	52093160	46750980	24368020	28916800	59152310	43203320	49681110	19133990	42526510	68642660	83278550	27363850	52179250	60919610	57945610	39314950	34337070	32710490	54017370	49635310	25629970	30928120	45256620	49993060	41275480	42655250	50454340	92362680	51663850	53116130	23908110	30661520	62406240	62086730	68343280	0	-0.0026	1	0.831234	0.825484
Neu1	695002	664293	3411903	732142	1882229	482573	583310	2162241	867404	314915	4285871	3556818	4092292	6685242	7042144	8580106	5288731	6634560	3664976	469870	460832	1268092	1814953	539554	1110514	1140039	833179	387107	8947597	7839675	2557934	5607131	968966	7182743	6047995	8275745	3833991	2307281	-0.106	-0.2655	1	0.872707	0.74759
C1qbp	144723100	92479380	108335500	77788580	49080870	114985300	67168570	102498200	51603920	35402090	117073700	112616600	109839900	95574160	192216500	120512700	104672700	98765130	96152000	121078200	90611410	113358900	53931030	143376800	76042240	70372510	85086580	44541720	187615100	93791340	91152340	84332940	40539480	203625500	133267200	204656100	128184600	62679340	0.018	0.1044	1	0.804728	0.845365
Gstm6	13108850	15898860	13202480	13946610	4100064	8509134	12498820	13226420	5617847	16736850	3251345	5473337	6982161	9316772	2529061	4177687	4961439	5528686	4525304	12279100	10939300	12248460	9770983	9268237	12024660	10217200	11871920	13366640	2330969	5565814	10102230	5597197	4875790	3582308	3788954	8939083	11394180	7838591	0.064	0.5302	0.919	0.617084	0.881687
Mgll	104772300	86398510	78029720	70698710	38872040	83275450	83482430	71768230	102625500	117286300	18828040	44836710	51045700	66007450	24678340	64939230	48075820	43563470	64705930	82487570	74063150	70794950	69349220	84884840	60827040	102647800	91405300	79431970	33136170	31676080	79238500	42914460	47458850	32733880	46020210	32109800	38053550	43878760	-0.082	-0.6381	0.894964	0.894815	0.538041
Myadm	2835054	1999129	1653686	2639590	1598986	1828127	2581025	2718889	1960929	2371457	1584511	1806220	2223867	3236500	2008321	1397078	1625843	1762304	1720406	2347551	1500739	4619005	2048436	1773590	1843115	2367344	2559170	1427023	1285423	1193607	3236237	1717479	2012815	938083	957863	3005206	2709478	1801619	-0.066	-0.886	0.664365	0.886261	0.372762
Nudc	580824	196110	432721	370120	773859	230396	265030	483143	98554.9	375478	191243	189890	185151	1036047	219631	395790	101134	209579	332253	129868	148226	461959	335993	501818	286581	445150	41905.7	180900	159344	173065	359534	474546	972355	203975	153522	131379	346447	59435.9	-0.29	-1.1577	0.413229	0.866827	0.219636
Ppfibp2	54820	79667.1	133623	186888	125630	200951	325014	297418	103088	45134.2	79907.1	196361	397101	501891	180867	130252	262145	384052	473118	219980	143941	466316	252795	61953.8	111168	331902	124747	322696	165417	139335	73812.6	203859	143334	68052.3	74060.7	624108	634096	128367	0.013	0.0557	1	0.817666	0.836974
Cyp4a14	180956500	401003800	851894100	306369900	348744300	337924800	495897200	569584300	848943500	419885400	147925200	220996400	509455900	1083539000	454530700	440834600	741466300	477541700	717658700	193061700	331255100	375714300	622476100	201183600	243616800	493051300	897975000	693959800	188306400	311196900	775535500	699036100	810559400	178721300	384642500	1003253000	486956800	1133816000	-0.029	-0.1759	1	0.861571	0.779767
Hnrnph1	142202	143084	108153	4192.65	86465.7	9312.9	40962.8	95484.1	66621.7	64914.1	65966.1	112017	31608.4	211899	63326.3	127104	51514.5	24382.8	0	37873.2	40217.6	23139.8	66547.1	64145.6	146984	80209.9	37479.6	172040	81449	44136.6	36508.8	192098	137542	62841.6	38452.3	50461.2	36062.1	49399.2	0.114	0.3838	0.967854	0.696733	0.876034
Chil3	58574650	54285280	121745000	90379110	147929100	77778850	70044820	100312500	39597020	76771080	29730930	61295070	47403340	45604530	155577200	37013510	49225830	40445270	73242760	98695430	73531780	92510660	71697660	40354120	52267260	36859450	50360250	28464320	59279740	70930560	60371610	120434900	95982600	28474860	102803500	74307920	307480000	36675370	0.002	0.0097	1	0.828533	0.828049
Bcat2	95242300	30559590	22486730	48999300	23611790	19161210	17759070	31056790	14926050	8744707	49160370	21952140	40040280	16388100	26766450	36187050	24220490	27175100	56662150	32609050	6816522	59810940	33302890	16106020	15949320	24850670	22060220	9407506	315080600	19347080	29689300	24304240	10876900	15634080	22236110	74137110	44917220	13327490	-0.102	-0.4011	1	0.885287	0.684807
Timm44	162215900	120143600	94374150	92395240	48458070	145130400	83854940	93697780	74901790	54006340	115187500	121598300	95053420	95011160	167521900	120290600	105806500	97935600	71448940	174613100	110934600	135028500	68332550	150912200	100500200	72588840	103908500	53222140	162720400	90867250	117697000	85357280	46903070	156743100	115784400	160509100	120439100	56172490	0.004	0.0323	1	0.82335	0.832562
Cops5	1338421	2195978	1561598	1648018	731195	2408202	1106342	3067620	693037	2720200	513829	665578	735216	1143009	262478	716049	2042036	1292171	1051622	1779936	890120	1326776	1837109	1590287	1278677	747796	2232878	2902504	649298	3132607	4404239	2063719	2308277	378938	528607	1076227	2426825	2509720	0.23	1.3607	0.284262	0.122163	0.851208
Calu	37366680	79141210	129690300	94682920	91023830	45580010	64258980	125547800	80065820	87118850	34172000	59103680	107190900	140175200	55341210	72343310	88698160	71019790	78626140	34547940	77200390	133238900	81537500	37487250	68279680	110599900	103215800	82706580	25413620	76586280	121450200	77982360	90962080	19979550	57043730	126014100	119057800	78254600	-0.093	-0.8116	0.739093	0.890362	0.421051
Fxn	61876790	37276280	24027980	30779440	10471600	44886710	26339880	24467140	24803540	10646540	28825980	24917660	16949780	9361983	23109090	15896920	12412920	18776470	10457620	58316880	29156960	25531280	18702830	67427700	32876690	20646140	31753140	9801606	34281280	10694890	28698050	20135360	13078520	26115610	22552350	21990230	17351730	9531479	0.076	0.4074	0.961391	0.684924	0.877372
Aldh1a7	40760550	46268060	43096110	43602140	26222350	32354620	36727390	46839200	28887730	66207490	28335850	20519250	54008770	43777850	17488880	25106680	24628480	62150640	17105160	45700920	27726550	44030640	39156850	45320070	31938180	33857840	52766380	50554980	22142580	23527550	51132820	32807750	27990520	35093680	22225910	32624120	28019150	34885200	-0.009	-0.0999	1	0.84989	0.802199
Psmb10	9638.82	69047.8	95938.1	119043	37797.4	6072.29	6191.51	250758	17371.1	21280.6	7286.58	5840.69	4791.48	28791.3	8412.36	8471.42	6950.37	7157.44	7992.12	21083	0	115515	44596.6	34981.5	23765	47412.6	74629.7	30403.1	6653.41	10277.1	0	11330	34273.8	6260.96	3977.08	6289.45	41706.8	0	-0.074	-0.2234	1	0.867795	0.763544
Rab33b	346318300	358294600	660941100	496845500	395582100	375594700	424063500	587906300	395333700	465945300	248550900	356607800	599818600	762197800	432114800	505518700	669398200	578226900	615480300	396787900	368724400	635843800	448384300	304510700	397051100	563338700	615188400	439673500	390320300	430379000	683188200	624828900	416337800	394079600	534197900	1007700000	633282700	621270300	0.038	0.4761	0.939533	0.648258	0.880304
Gamt	70914990	59874010	30007980	64432000	12909800	41354090	53610040	34105020	30980600	61878480	11752810	14124260	18482910	21255730	5379306	7834659	7618865	12619610	6656048	70171290	39757680	47636560	19174750	66852490	41565360	38995020	44753000	60793730	5424524	13276300	34433950	9042566	12596980	6725432	7909595	10099140	16301550	10888770	-0.029	-0.1239	1	0.853826	0.795552
Mrpl23	5413618	3269139	2857859	2194684	706359	2897826	1818919	2049081	884325	905444	1183296	2686379	1452358	1359434	1307226	1429805	928831	2024934	675618	4351873	2637791	2796245	1747585	4706029	1872710	1909491	2359761	1340874	2467070	1646972	1537582	958665	905188	1358623	664313	1441665	1163267	659135	0.002	0.0117	1	0.828086	0.828458
Sdc4	27075810	12154960	4476347	5263532	4369031	17730100	25505360	12463610	17211920	40651670	792083	3458874	2469983	4231561	6086479	2364780	2013874	3326565	3161049	9337797	7380939	9560438	3345505	25112200	21023510	18334350	23474580	16645850	4865314	3353129	2964962	2485935	3932708	2170567	2512990	3811787	7091670	5546969	0.011	0.0362	1	0.822425	0.833315
Zw10	350948	207848	361707	165011	128051	222903	145148	335668	140372	74410	79783.9	110716	208921	405362	43150.4	207907	200568	58450.8	199150	127179	219121	307786	174860	271248	171126	332783	369849	43710	184243	61844.3	228692	343103	121164	89233.2	130015	354508	296942	227408	0.151	0.8585	0.706248	0.400302	0.876613
Ddost	549760300	1873516000	2227724000	1809108000	2041502000	984886700	1848547000	2117962000	1588827000	1957795000	877468600	2054838000	3090104000	3969073000	1934321000	2506457000	3151097000	2138342000	2641109000	595614500	1731454000	2240991000	1913351000	709342200	1396517000	1865052000	2258494000	1892574000	695754200	2278154000	3619432000	3094484000	2456863000	722538500	1841703000	4112656000	3268934000	3369060000	-0.074	-0.4262	0.999565	0.887155	0.671104
Cyp2j5	101598300	125646600	100092700	129607700	83310750	109989800	166406200	104804300	132866100	239036200	85019530	108482900	194234900	282425500	138047600	73305830	226918700	130180500	75574960	96941200	172341200	240274000	243630700	100582300	146783300	134523600	291035800	230591600	66258900	103397800	162128700	175329300	209679100	61416660	82046420	218390300	233887000	159788500	0.131	1.1573	0.441738	0.215942	0.861144
Cyp2j6	1864560	1587108	1087924	1715835	196442	1592895	442965	1441526	75062.2	310905	112002	544880	390626	683165	262198	540015	320428	644492	206405	2597084	518893	1605994	361413	1554350	1393105	666999	804634	901741	812208	410385	821310	498263	580242	429629	395804	244387	750607	671976	0.308	1.2872	0.338255	0.152448	0.854559
Ap3d1	7574733	7231774	9181719	9824232	9203813	7152154	7492909	10024350	8082941	7751916	6550611	7508713	15927060	22369980	9122863	10405170	23779390	13367070	14818560	7596696	4490963	12019710	16650310	6123022	5111783	12098810	15062180	9765867	6087428	8883070	18114970	17937730	10365380	9617565	10900940	29954030	23929070	21452530	0.106	0.7413	0.801069	0.480411	0.880667
Man2b2	19788790	17713850	54750680	22786720	54329170	26527920	17152270	38063830	15612820	12245940	69933240	62506220	62341590	113736400	164323300	144102100	106404600	115371200	102576800	15712500	16963080	30500120	38619850	18795420	22127050	20071240	23867690	10613250	68758600	119333200	61834000	110975700	55633270	139764600	152141300	129635300	124452900	104537200	-0.039	-0.1313	1	0.854993	0.793424
Gucy1b1	1332825	1091658	1767146	2609394	1375192	607780	1647323	1436155	1562716	1518589	754037	1366713	2038360	1982695	1132074	1436368	2124705	933790	1552489	673059	1020147	2640445	1346925	1011984	1040393	1712621	1887975	1361211	1500375	805101	2492800	1553193	2594188	835382	1126893	3386178	1697280	2184613	0.019	0.1636	1	0.786776	0.854265
Itgb3	6560436	3811925	3463852	2659120	2898272	2810588	3068240	3549004	2213096	2040873	4108829	6009933	4708474	5064888	4426758	4070630	4106993	2994252	4693093	3734834	3135067	5110644	2502788	3146167	2746927	3123135	3244715	1541892	3262659	3195715	4361933	4124508	2675890	1805762	1897305	8851876	4786388	4199149	-0.132	-0.9881	0.562755	0.879359	0.31046
Rdh16	59132440	78644440	98736720	40178960	49712710	44636700	53855110	59207020	58323220	82194200	34486200	31747220	83231570	124444700	51873930	81134480	108332500	96439900	83940610	62661650	75693790	49920060	71829320	42990810	58862580	64405540	96728340	84605520	38816460	88790040	127662400	65253500	88458910	45279680	106319100	131762300	53848370	103861500	0.092	0.8206	0.738742	0.426107	0.878139
Prkag1	1614492	1620982	3218275	2084911	1527075	458411	1754822	1683973	817391	1881915	886605	373884	1612136	3221648	480169	1168150	1721426	2548999	657974	913606	1994617	2776546	1061931	922530	824858	1891353	1049377	1885543	369063	2081044	3243675	2110770	1623421	745758	1136583	1966267	1288393	3266491	0.068	0.4212	0.957363	0.67783	0.878074
Banf1	1088470	428606	882123	227918	126383	1123036	256916	793073	316318	595829	540048	409157	1346662	502614	984744	1098578	868904	498092	825230	689295	55857.3	649650	214050	757796	700951	652458	412273	164539	1344868	171276	872028	1137740	98745.7	591327	1100116	549846	903133	611947	-0.227	-0.8828	0.667599	0.886457	0.374795
Asna1	3659122	3250038	1955225	3517917	1001689	2155417	3031573	2932577	2269501	5242025	909744	821215	2079123	2449049	711986	1727011	1537080	1701902	1296382	3208122	1878053	3600135	2724032	2660989	2172157	2032496	2516751	3760515	1281130	1140680	3552064	1883858	1381658	1142407	796582	1362542	1736333	1568952	-0.016	-0.1276	1	0.854412	0.794493
Bnip3	24571970	16466070	6041305	11020470	1543773	25101170	22993610	8290424	16097060	11317190	6125127	5728078	1111986	4585951	5629677	2387745	1129063	825382	886585	20848580	23575370	10726680	5092775	29553160	21566290	15112940	22865340	13302410	6048606	4967424	4270032	1778902	5009702	1062571	650932	771529	1291435	1659697	0.009	0.0233	1	0.825449	0.830795
Trappc3	1619453	1506817	1979498	2311008	1945119	1186870	1584130	2666122	1343413	2176430	682166	1135452	2984523	2340152	359232	1241172	1868062	1792651	1936527	1414413	1230335	2375134	2598156	693930	1398585	1859394	2232653	2241877	1559593	986750	4606348	2318246	1920348	885415	890056	2210600	2149615	1883685	0.059	0.5026	0.929863	0.633232	0.881078
Pgrmc1	1065107000	1778393000	2390767000	1954809000	1779846000	1189818000	1595056000	2488857000	1940196000	1992435000	855600400	1344014000	2765954000	3963447000	1597433000	1939012000	2814318000	2312975000	2451043000	1036014000	1864913000	2586373000	2066136000	1063506000	1501542000	2074943000	2783184000	2175814000	688143300	1881312000	3216682000	3330757000	2592912000	800637100	1371813000	3537229000	2661468000	2662240000	-0.038	-0.2984	1	0.876186	0.734015
Impa1	3629580	7023426	9260547	4884873	5608171	5014413	5561031	9621927	3164719	6071782	3533339	5150419	10851230	6715780	3483651	7118905	5796374	4095281	4031267	4187887	4200440	5434939	3563408	5197917	4369540	6437359	5067752	5625667	4139448	5942063	11055180	4644615	3146637	3378135	5249801	8833216	7066402	4713269	-0.091	-1.0173	0.534865	0.877225	0.293649
Entpd2	289609	173642	330831	240828	77977.3	238410	115410	185668	163087	146892	97144.4	125497	258672	361305	138596	184909	204973	222746	191360	171328	184416	340252	136659	295246	122450	166889	110033	82500.2	293713	96402.3	273166	174167	202107	121655	64765.2	331285	254225	199959	-0.085	-0.6223	0.906722	0.894773	0.548648
Copb2	18508400	23733900	28115850	18596170	19848630	12626050	21162790	28907690	12145910	16399760	11296680	21067320	26820790	28963980	10288710	25134570	33577560	19947350	22000180	20177940	13489000	20206740	18348490	9420354	11850960	21963740	18931190	17399060	11500600	16874320	37096100	23820100	12158590	12165150	10617850	71390520	32015950	23645930	-0.077	-0.7145	0.831338	0.893895	0.486306
Tpmt	1277621	949286	1219264	2603399	1543995	672776	927158	531795	1301670	2412179	821574	962439	1495095	2608349	522264	1693284	800699	3086299	814113	1556449	1128559	2518656	1542255	546005	1474693	979296	1230584	3572034	651936	756338	1965965	1898037	1620479	1494929	1032045	1168627	2420839	2257368	0.145	0.9315	0.640868	0.351565	0.873227
Dnase1l3	688184	293507	123585	140134	0	137489	351773	159656	140839	359290	67924.2	142556	28265.5	99601.9	142499	61413.2	36359.8	69147.8	25738.3	73963	128562	186772	0	558325	12706.9	230653	448368	106153	77693.4	66398.9	48141.5	95640.5	18442.1	52880.7	128464	63328.5	46809.6	23845.7	-0.328	-0.9482	0.6019	0.882183	0.334182
Cyp2b19	1391648	4101050	7025131	4592900	3835498	2708666	5280921	5538467	4439330	3583973	2824664	4379910	5897223	12938890	4360712	3433670	4786120	5967018	3429009	3265860	6269530	5912173	4585327	2402687	6069542	3791260	6652702	5112226	1864198	7840416	9075937	11466180	1390177	2388636	7680573	12861960	10434720	8376099	0.166	1.058	0.526809	0.272157	0.866535
Dsg2	54633640	30754750	21713580	22095830	8446119	30780350	36603160	30704070	20964110	31075820	8944503	13031560	17116750	26892360	6794524	8069277	11293850	10241010	6381988	45257610	30622530	18032360	11135650	41796050	31644690	26966130	23142150	26948930	11300430	13003460	19160520	13084800	11426490	6928019	7242103	11366810	10422820	15469540	-0.029	-0.1809	1	0.862263	0.778143
Nipsnap1	1249691000	903681900	623173600	568280000	211862300	918536900	484591900	508230100	472672700	430885800	357914800	526896700	415265800	487568900	408764400	353592400	457653500	489632100	247679100	1241873000	778179700	548831500	421541900	1330927000	589039600	488380000	840501700	539559600	577724300	374520700	496122700	444558800	274187900	384042400	355077800	705702000	505635300	275015900	0.061	0.5566	0.907791	0.601184	0.882091
Nipsnap2	24776320	14789900	12271570	15858360	8715989	11138990	15969640	8024377	10513070	14455410	10374410	7927088	13211890	13642830	7144800	12490290	9948704	10601150	9975294	12323230	12140190	18631380	14016460	11419800	12525830	9810855	15386520	13446040	31955260	6306951	14381790	11214650	9546834	5770644	12920450	14838190	14570650	9557710	0.042	0.4135	0.959633	0.681805	0.87769
Septin7	8872007	13604030	33156510	12723890	14627420	8480836	8855939	23117260	11442010	12084950	6397879	13644700	20238840	32549200	10555940	18405860	19289550	14626700	18191840	9743055	11679270	17507400	11108240	7567559	11777520	18587820	13816300	10300590	6801085	13752190	20300780	16998070	14779720	9178101	12674550	30834200	29456980	19819970	-0.057	-0.4871	0.981852	0.890919	0.635572
Rpl35a	36171560	167249500	216015600	172978200	278928400	78401400	181719000	257176700	255959700	294150600	33267480	147496700	320416900	564188000	79739030	210660700	501672600	343872100	400935100	65148270	220716500	301472100	305363800	56617560	171363400	231572500	331342400	315555600	49070690	222225100	542829000	453329600	414183000	45065620	176754200	605160900	468019800	435486000	0.154	0.6539	0.858326	0.539237	0.882205
Atp2a2	106520300	196727600	211678100	168373100	191355200	105328900	140515200	268157800	175709000	198097900	69750960	134869700	184681800	326687500	128836200	116509300	188739900	94249990	135950200	89226780	176038400	273174700	190186000	71368580	135100600	235841700	221802500	186346400	78838270	168210400	219472500	185316800	233341700	34031590	81928860	214832500	193300900	176036100	-0.061	-0.5606	0.947001	0.893797	0.589367
Ilk	14601570	18054470	12276110	11848350	10678540	12083240	7359656	9693704	9871439	7813886	9547096	4751761	7775793	16311160	8125001	8600677	6867530	3698532	7361329	7352347	10549770	6949572	9294233	7774700	7980086	11889640	9798045	5490075	2864114	11245780	7172128	16288230	9506083	4438058	6082330	3491482	3994912	9810779	-0.247	-1.7922	0.075213	0.837336	0.030194
Chkb	3238942	8307207	10116050	14856760	23068350	5869994	7924747	9630361	7576430	15615260	6110256	16140260	22437310	44880740	13801430	15617400	25770610	21426500	25005470	3617494	7879016	20761300	22093620	4126374	6498246	12119020	18505310	15005860	4233508	18223010	33245200	39367180	28696160	3631103	10827140	34027040	28822530	28918260	0.032	0.1431	1	0.793286	0.851334
Psmb5	18199040	16073520	16253380	8111461	4366183	13927790	23295260	7488098	16035690	25060440	4014800	7698353	6514619	16005450	2603113	6375551	4440495	5644835	1964955	15757880	16098830	6515220	5841538	17680510	13564590	13855980	19281970	24997350	6839921	8614891	28405910	11366690	12124420	4037898	2540698	3602499	3514925	14733720	0.137	0.6165	0.878992	0.563608	0.882405
Sigmar1	11453120	27640900	29927960	18030320	19817680	16971760	16127050	19061480	19898750	22757460	12718390	19622230	30499950	47194620	21277240	26988040	42582200	32339460	28186630	13235220	20448040	30949390	23975560	12392240	20631070	22425170	31962140	23931910	7837661	32841160	39667200	39166010	29062670	15193030	32124010	43272390	34563190	33802610	0.073	0.6299	0.87184	0.554947	0.882367
Dhx9	99904080	77053470	90707170	48887150	34493210	83313950	52854220	68143370	41029190	36006170	72613560	74028200	68531060	77239390	102587600	84903670	56243580	63611260	43726830	93030340	62885720	59526610	43323360	99414310	60807210	58550930	70580280	33607470	106793400	79775280	66521170	61529240	36871190	114216500	98885240	75978060	75483160	49711560	0.051	0.3796	0.968947	0.698792	0.875778
Dpm1	13500820	32352670	50462870	50143470	39691820	17406150	35121210	47774470	47181560	64080930	14520070	24560100	64571940	80980870	26212710	41773620	67804610	49595440	66839790	13800720	44310170	62551530	54187500	12983990	34330740	49955090	71163880	64476720	7653198	41380440	73410140	69742460	66299150	10123650	35985380	89393090	75701190	74623020	0.032	0.1776	0.999661	0.782143	0.856179
Pip5k1c	1397841	1250438	1375884	2287068	1527310	1214638	101546	1268667	2446563	1339725	1223690	1344403	3314974	2509822	859432	2678451	2441931	2560176	2953477	1502538	1722362	1899041	1934701	572117	1039479	228531	2427187	1380922	1710818	725508	4110552	2286122	1465613	724640	723671	4213142	3795925	3139424	-0.042	-0.1669	1	0.860304	0.782641
Fcn1	1254065	1900929	1106447	1641416	1058967	1289838	1039424	875733	1850027	1712961	254758	752571	1178446	2206082	459468	609970	945760	1245061	971553	1071966	1015482	1181419	1783876	1051709	1224932	1082577	2042626	2101133	1347234	1078707	2619208	1241081	1305466	373192	839013	1976881	1461704	822360	0.129	1.1594	0.439993	0.21482	0.861032
Eif3d	6080054	6484518	5212279	4078566	2732239	3297901	3933840	4311092	2464525	4566591	1146331	2710347	3390795	4538799	1442136	2283889	2031271	2140914	1514122	4307080	3364938	3204996	2649584	3610062	3162986	3818284	3400351	3609737	1191533	2624404	4307018	2559890	2260424	539334	1608985	2065496	3513455	2716574	-0.172	-1.638	0.128776	0.841674	0.054637
Aif1	569225	475268	957025	625069	636300	425792	119967	1210475	424179	229734	175004	778369	439603	1646999	302890	324834	396960	657147	713263	240032	485197	1380808	824018	375041	232963	1325797	862670	256040	360964	615050	368559	476960	326310	138191	279435	384366	711825	209935	-0.135	-0.7678	0.781831	0.892248	0.45028
Atp9a	277613	114667	167835	124034	266205	284539	284380	318260	125469	180219	76813.2	273086	190004	296292	364286	388862	221719	404529	500285	532454	117367	694644	436931	401022	530906	627805	297691	646632	260161	320514	134562	315800	176719	220527	273473	703860	313200	497938	0.438	2.5258	0.002305	0.000448	0.829497
Eef1b	57283870	57337040	42314910	42193180	13958000	31450370	42427730	37804810	28332060	45920580	9156671	16089970	19935090	19791090	4510408	12054210	10356360	8034859	8527531	53645310	38323450	34491390	26040190	43479610	35173650	35113800	36134650	42614470	9729767	13528450	46809640	9620966	17153510	3495075	6871332	15304400	13274110	15008050	-0.009	-0.0441	1	0.839754	0.816229
Hmox2	205617800	81517630	86617070	121364400	65461960	159934200	128540600	139786400	102741800	97108550	99358230	139863200	140397700	119199600	128590600	161202100	93358490	45632230	68931010	183573200	153619100	160892000	107578100	142743800	92297400	139139000	177552900	91843000	38385860	100378200	140404100	108367700	75576780	148276700	97086270	131554400	121407000	74680480	0.027	0.2439	0.99436	0.758195	0.86424
Tpst1	1794216	1362226	1390212	1137311	2956861	1141665	1543036	1320625	2425852	478754	1028264	1402784	1881039	1585094	2147702	1342944	1864782	2233518	1171729	1649776	1913857	1701355	1676411	555720	854010	2115826	956441	1620310	1477769	1825196	2626015	1977608	2916903	2124231	2059321	4074372	2391323	1960524	0.127	0.821	0.738407	0.425833	0.878124
Cideb	1987189	2556918	3398984	4247826	2780048	2618912	2803592	3273438	5507716	9191735	1539986	1739682	3223499	4691795	2599297	2047073	4996936	3697838	3676604	2292625	2075022	4726348	5568259	1471164	2981369	4547413	5500857	5366516	1006485	3323199	4484616	3616743	4394095	1704674	3553203	5461691	5338449	6389020	0.076	0.6007	0.887077	0.573707	0.8824
Itgb5	1437515	1299222	1831741	830566	1240490	2455191	986688	1095185	1433455	1145865	559349	1343328	1972557	2065532	1239705	639797	1327076	1725226	1794370	1651289	1153317	1206941	3517832	1384865	1173820	985406	791226	1261093	1293815	847619	1929491	1766052	1787042	1396016	977201	2599960	460396	1744119	-0.002	-0.0158	1	0.834041	0.822642
Nmt1	1490013	5192430	5342899	3119708	3467406	3354594	3474701	2702443	2916755	4974181	1115647	1692326	4570479	7228003	764722	3228379	2226344	5520703	3680194	2445027	3524289	7847960	4175715	1213661	2987966	4194362	4165819	6199436	554433	3911599	3284758	5139285	4054109	733647	1488519	5615189	7227106	6557044	0.042	0.2454	0.994188	0.757615	0.864404
Epb41l2	4567313	5446080	5136053	4253954	3617025	4097944	2642545	6961126	3731760	4166510	1859184	3876650	3314104	5032355	2275571	3055046	3014449	4306787	3594045	5005969	5171748	6807667	3753065	3554128	5159027	5035118	4029709	3677359	3239095	3350251	4208672	3146554	3323166	1566065	2257234	3224044	4525523	3362541	-0.021	-0.2881	1	0.875128	0.738373
Gpx4	188718300	201516600	111207200	138341400	46492530	137889200	118026800	122131400	73260290	101841800	70622990	94754050	48307580	74792980	76613530	81026940	40010040	54179230	43671850	189094600	135677600	103550400	101300000	172903800	134409300	123957600	112574800	84312390	181410000	79717140	50687150	61566280	40209320	75146680	63996070	77473380	62758730	48720770	0.041	0.2657	0.99162	0.749592	0.866534
Gpld1	34289600	56095510	36855850	46501670	51157300	41030940	55333310	44422550	42717440	45818640	15168400	32782620	27534880	61927490	12285540	28402450	28042970	26842770	24011450	33252360	48054130	36222310	36027640	43459710	45741440	44890650	51151010	33561860	10572860	45801540	38258500	34914590	41841370	6830435	17163540	26640030	29298060	24394850	-0.117	-0.9778	0.572758	0.880099	0.316502
Ctss	48066060	85499000	98854960	116383200	88713350	42843370	37914470	140410000	39629420	39236430	50349300	64887920	121218400	122401500	97555790	85512430	134599200	124676900	295679600	33386070	47671720	217490100	113199700	49329330	47103460	90285380	74870870	36640390	53378160	88235810	87995100	97672500	52086980	79166150	73095500	397817400	228329200	86350910	-0.03	-0.1567	1	0.858831	0.785825
Emc8	12402800	33851370	24426580	18251440	16073040	12258060	22673490	22944430	21249310	26499190	8354313	14589940	21196840	29883700	12611690	14016320	17059810	15977340	15524310	12617340	28120850	21889370	18364190	13687840	19436160	23942520	26954230	27207440	5729500	24007100	35821630	22543740	22062710	4957997	12030750	24741630	21385650	19256800	0.023	0.2498	0.99367	0.755903	0.864878
Pdlim1	4962970	2052139	3723333	4237312	750119	3097441	1997995	4595609	3375417	5837684	1151394	967431	1220116	1577169	904186	1073519	928824	1708836	761954	3293005	1073649	1885205	1383150	3206329	4660395	4690291	3671134	3355714	1424318	499683	1284521	1681931	1097003	540427	1171905	1761867	1385338	1252546	-0.13	-0.6955	0.848088	0.894291	0.4992
Vamp8	22516530	22006630	11049010	14602730	16228420	32902730	26528040	23117540	24563850	23467670	6799942	11664700	14619070	25464930	15428040	13655190	16002030	12390770	15178830	12257030	16838510	26205920	15593880	27554870	30027620	27536030	32627100	18880660	11263560	11969500	16548840	14909900	16996840	7255538	7429030	19604150	14723490	16813730	-0.043	-0.4112	1	0.886054	0.679375
Psma3	29179660	34090980	45893660	36630210	21013890	21174860	37480410	34016910	22657090	43002470	16967920	18549610	31842970	28567170	9391200	13862430	21790910	15257690	14488600	28976290	25654500	38048250	27775730	25799710	20323480	30799390	37863130	42776300	10102440	15412850	57824660	22913110	22739160	10166840	8174834	28833640	21450630	28756180	-0.024	-0.2194	1	0.8673	0.76498
Stx7	15157870	13845400	17458360	16786400	12905140	14127950	12313150	21454800	10373700	12965150	7960519	12262410	17262620	24008360	11823970	13456900	14292490	12657260	14071940	11018350	9973114	23347170	16114040	15023500	12439940	19488300	18534040	12272200	20063440	11388940	14273750	12808370	12477420	5256497	8605627	24557620	18525090	14363080	-0.027	-0.3734	1	0.883072	0.699146
Slc16a7	199171	625899	1314481	1054141	2264801	986959	1014481	460460	1714152	2744328	1114140	1178787	1735868	3742219	916362	1889839	1802826	2893690	1578441	581869	896811	1503061	2095067	198594	730790	573497	1556254	1706144	1495793	2515282	2409093	1527144	3946009	1399020	1550030	2126243	2108718	4094198	0.089	0.3614	0.973482	0.707563	0.874598
Sfn	597616	777398	377764	1060428	1873746	619251	735500	1446500	826617	2691368	449578	632120	1495468	1871427	770508	127132	1709037	1405451	2330872	10588.5	1273903	1389327	1473944	655470	706814	855643	1080348	2147358	506505	553128	1059958	861493	1988460	420360	854085	1131146	2640117	2689808	-0.15	-0.469	0.988144	0.889928	0.646428
Ugdh	59647640	93090420	134556100	93034830	44105250	48070440	62383900	126453400	50511980	78393910	29763490	40488590	90051240	69241790	16747420	38074030	34770400	54399960	42401510	65109150	59115760	110233000	104672700	60459240	56912420	63843640	78012330	82950120	23312660	50377340	101663900	64056310	43138380	24233790	31415900	79292460	50389340	50786760	0.027	0.2095	0.997656	0.771036	0.860264
Vamp4	127699	75204.5	37481.2	75861.2	73626.1	66114.9	65389.4	164038	44039.4	123314	5507.32	6046.56	86150.5	187957	17201.3	95176.6	144578	2408.43	108766	80710.2	80644.5	114598	90109.2	155552	163584	106352	151097	61143.7	29885.1	66319.4	165175	89678.3	0	79280.9	25159.3	193737	106406	147180	0.399	1.2684	0.352646	0.160867	0.855463
Snx3	89915590	50199550	41141190	48188180	10698630	58883590	33436800	49382930	47916680	65300010	5845856	11880450	9904269	11336750	6096478	7819817	6370646	5602318	5733439	55086660	35201240	39353220	32471490	70889380	48240950	65596290	55447590	63586130	15285430	13358680	27344630	6421525	11478960	4055039	3765344	4809314	7366698	4978442	0.012	0.0359	1	0.822497	0.833258
Clcn7	1245562	1389536	1073241	485054	817492	1133340	704371	764170	757089	680141	807171	861265	1695010	1101597	1279732	1271181	1925231	1375361	1513159	780773	764425	822550	1146517	940181	798594	884680	1015339	763370	678761	1212469	742407	1466987	1114501	1309553	675624	2552500	1891672	1185020	-0.029	-0.2085	1	0.865925	0.768828
Hsd17b12	178100700	298024300	334285400	348039700	333871000	223163600	272994200	391719900	291724200	397429700	190420900	235473200	481020100	634796100	291093300	247196100	541007100	302036000	327656700	209752800	270525400	415831600	417554600	171540800	246444900	357376800	422513100	373103900	116449200	208141800	359256500	443885700	388112600	190444300	230303700	726836700	600945800	422080000	-0.036	-0.2956	1	0.875901	0.73521
Pigr	127350500	135560900	88863190	91056610	64116410	72235050	205747900	98306840	103760300	247632400	18976200	40915730	102308200	132885600	26102710	47684280	94216360	96626440	59699400	77393300	100855200	89353250	81403950	138914300	88594210	90657380	142417200	167319300	14181740	46472220	85811990	81757220	91083410	16236100	41347150	80229670	57658690	90389030	-0.18	-1.0645	0.491506	0.873715	0.267497
Pdk4	16436950	4342169	812012	1379619	1409528	7566238	4381512	737366	7258629	2471394	1650959	9280936	2411088	1092333	8609700	16978860	875220	4846451	2886173	12332720	1091275	2365582	889972	25237850	9290529	1481657	15710050	20945680	2420712	960960	1880279	2455099	1068851	1566968	4443797	7005059	6231230	4478033	0.163	0.4672	0.942621	0.653197	0.880002
Smpd2	3701794	5241864	3602855	4914299	5285614	9897877	4429996	5841659	5881606	5061196	2214749	4106411	5189204	10415240	2733040	2468164	7330817	5831982	4574932	4976448	5454272	8093695	5910239	13484120	5100548	5511848	7354236	6345013	1931077	3877919	6900507	8686783	6264714	3707790	4118182	9549800	7678423	8510377	0.197	1.8365	0.051397	0.019281	0.836467
Slc22a2	4467617	2373296	1677617	2597372	397100	2055359	799200	1322688	538788	514185	1568790	272846	49130.5	328155	538200	511966	89181.6	102121	1084692	1905037	1746532	1327896	1434443	2927950	2147756	1954433	1484611	372071	31280870	849466	419738	36111.3	931958	672102	553982	293836	1114185	507105	0.415	0.9848	0.592386	0.317186	0.870488
Slc25a17	96602250	95647850	102793700	166657100	115324900	115187700	84899290	88422880	126424800	129026400	108392900	84324610	149523500	146090600	141650000	147039700	169809300	164023000	175563600	97321070	64871890	159558500	181227700	78429300	75681410	91098410	120022300	114581700	110354600	99941170	145673500	145138100	130595300	178138300	126285000	288621800	194186700	157345900	0.005	0.0419	1	0.821058	0.834403
Dtnb	313390	32704.3	276662	297155	123869	103069	156231	104676	73077.2	178646	21459.8	194925	229418	248229	183202	51492.5	196526	166395	78267.3	93656.9	98059.3	48013	208732	190361	36812.9	63235.1	58278.5	176480	93460.1	71518.6	247042	244737	153155	88743.6	165081	233236	221535	65148.6	-0.161	-0.6938	0.84956	0.894321	0.500353
Cask	10485310	9981900	16931800	10796070	12004260	6180943	8824113	8608651	10712200	9086546	9663716	9881372	13177590	22682750	9766607	15936520	7945395	14250940	10097830	10807290	8537443	8237480	8899100	4698115	6982475	5438730	6547828	7520784	16356140	10584720	15709360	11567130	15086280	9494192	8074585	13391560	16588190	17516420	-0.09	-0.6792	0.862006	0.894545	0.510258
Cdh16	1415031	3693391	2979540	2322437	1031731	1165544	1201557	1952132	2608913	1455798	1906462	1675715	2386214	2115968	1894171	1993260	2132277	2209687	1541195	18075590	1768583	1721525	1671304	1133757	1501298	2513159	1935252	1112738	517713400	934810	1558607	2425288	2331750	1401718	2123194	2446550	2365941	1728117	0.292	0.839	0.72314	0.41355	0.877421
Wdr1	25082130	16379970	24190700	25278810	10874720	29746370	14837180	19573450	19329500	29156350	14628580	14461740	22773490	17663080	14680000	11853840	14077630	15432970	21322860	15155640	10348630	22004410	17284720	19309050	31061050	19747220	18405450	16506710	11066210	9544853	30924560	13429430	11339600	10591100	13008790	23104350	22009970	18836290	-0.102	-1.0977	0.462462	0.871237	0.249871
Slc4a4	22070810	36721260	41825610	27899610	36351720	25031680	35907430	19616030	36308880	35288960	15361290	34404850	42949770	87833130	24513440	29526270	25905790	47447080	22044360	34388570	31351050	26078070	30703430	15438580	24059450	21818800	33493500	32938010	135845200	37731120	49715000	34645140	52733310	19505960	23245820	38171010	38681720	56195800	0.064	0.4784	0.938722	0.646973	0.880379
Ikbkb	262364	124296	107440	778830	446614	53141.3	115238	139602	0	0	235428	19408.4	315990	33239.5	614530	609030	600090	322203	159356	45610.2	509627	183830	26520.8	69122.1	90336.4	119122	1790599	62203.5	378704	325330	149387	577748	380721	198717	208712	541329	802362	635647	0.355	0.8756	0.691185	0.38875	0.875868
Vti1b	4655894	4111825	2366001	3992119	7186861	5892187	7094419	7560334	4335390	7062276	2905989	28187410	7073582	8505034	4904165	2964796	7434399	7546186	7224250	3851175	4230460	30178840	5644241	4674698	7835269	3909971	5164593	4573682	53275170	4660390	3531734	6408910	6076830	4080402	4921399	7913817	6144168	6127273	0.062	0.2913	0.987738	0.739027	0.869007
Papss2	124739100	158293100	263285200	175542300	84490870	84109530	145524500	194020000	108282700	180875000	49181640	80197970	138363300	213838900	38749180	100426900	109750700	119401900	56205860	142436300	161167800	156759700	111607200	123485700	146325600	170972900	184895300	149243600	52830840	107862700	240097800	132105300	117808200	42534590	79242070	111051300	135505500	125962100	0.049	0.4756	0.939708	0.648537	0.880288
Mtx2	37575550	32388640	28054700	29612370	9893020	40189590	27232960	26020990	29129790	21115720	29688780	43298680	31269810	33241440	31607680	35290050	24197310	34826600	15538230	35540620	33512520	36926280	28195920	54616130	33584270	26607090	37723050	20825860	60118800	29130650	34877420	37933540	14978310	36415710	29485810	31963890	36835380	19819770	0.128	0.9873	0.590118	0.315604	0.870356
Rdh7	1748479000	2204942000	2869282000	2189978000	1899836000	1652689000	2429944000	2363607000	2670097000	2523217000	1113507000	1682751000	2842179000	4527187000	1767344000	2603685000	4227386000	2527687000	2985372000	1844022000	2206855000	2505367000	2096344000	1278691000	2015312000	2502299000	3362726000	3025770000	827351900	2195448000	4031705000	3806889000	3215552000	1119002000	2055912000	4259843000	2926681000	3516960000	-0.025	-0.2066	1	0.865681	0.769489
Dhcr7	98436990	360304100	422917800	339825300	456823100	167837400	263763700	333748500	356498900	386680100	142927600	288528000	580996500	735049900	262640700	381705100	622204200	514360300	508123000	147245900	344302800	479444600	457402300	143957600	299511700	374990600	409780000	387547100	116024200	556144600	626701800	641111300	489894500	184046200	460840200	703384500	595184400	574714100	0.057	0.3583	0.974222	0.709032	0.874387
Capns1	3436955	2923549	3452488	1106777	2086198	2101811	1178724	3094028	2160054	1739348	1912298	1384142	4421230	3947634	1943083	2626848	2160013	3271178	3447980	2593949	2224663	5312808	1919463	2148796	2425873	1796738	5723420	1627988	1262119	2004978	3699491	1306836	1860734	1869587	2680486	4546874	4090315	2584193	0.03	0.2401	0.994785	0.759658	0.863823
Dync1i2	4368887	3372032	1478485	676361	360266	2065968	1504703	2489882	3189840	134775	4518750	2674695	2616469	956679	3454748	4416679	5562.38	0	58516.4	57772.3	1798263	1535712	56505.4	2940473	1121801	371736	101973	307449	3065694	2591262	3377972	941349	303145	158162	2524960	2544914	0	252688	-0.48	-0.7291	0.818117	0.893521	0.476408
Shoc2	142655	23082.9	142212	205558	387409	28865.5	12931.3	282812	278959	52783.2	294020	34726	514291	492005	98977.9	187982	585074	383779	439930	201246	64639.8	10151.3	186671	68336.2	115969	72657	357046	0	342873	43750.4	349598	479568	415737	28550.9	453927	742858	845247	1090091	-0.094	-0.1945	1	0.8641	0.773629
Ppt1	88550540	90362240	117295800	76487790	43641120	71095860	66981510	106132500	49810230	59164460	49201940	67615930	42603620	103215600	63465460	76372660	66364470	67355110	52575190	64991660	71071670	77389390	59225160	69352870	64201080	87907220	90428040	62843130	63374940	90317500	40808950	83039790	52973670	62496470	51040320	66429650	62289860	59115170	-0.053	-0.6781	0.862929	0.894559	0.511004
Ddc	46535690	31532530	50148920	43526560	30740770	39467370	33072960	37046120	36043510	40891700	33058950	23769080	38323490	48620840	47771430	48169290	42614800	36229710	42163220	37506140	27063980	45613150	40020190	29968270	31146290	38544400	42207630	37227450	24801770	31353180	48262150	37382640	41624360	34699690	37396760	60534630	51017410	38241320	-0.036	-0.5046	0.974909	0.891773	0.624862
Cops4	4607411	3602048	3433179	2511694	1992032	2724361	3509299	3248790	1843160	2699178	898841	1831021	3466344	2977692	10067530	1818400	575393	1662207	1152760	1939534	3295150	3240169	2683334	2455649	2038532	2437431	2545154	3139531	632279	1429698	3559029	1385994	1901050	1195355	1493541	1096844	1842844	2468918	-0.208	-1.2538	0.34269	0.860197	0.175537
Hnrnpa2b1	8446759	37333010	13950800	38250640	6379655	24279890	25169280	31605730	14131090	20899670	2017661	6420749	4327021	7191700	2191775	2120966	1575446	1843761	2616673	40680560	20325380	37016970	8586203	17023880	17281990	30705590	18717330	20427580	2439292	7437256	4946470	2460683	5491045	1014437	911498	4734232	6559398	4194703	0.019	0.06	1	0.816585	0.837757
Comt	337122100	432722500	509574500	458617300	324090900	293625300	420290400	506908200	419497400	483577800	165107800	275399600	517944200	619077700	314308000	393743900	651678700	328657600	487272400	296911300	322679200	517250900	351335500	276897400	323708300	694789300	479723700	473088100	137314200	330174500	728600900	389435000	420736400	175635300	284695100	752247700	472392600	476768500	-0.066	-0.6819	0.859731	0.894508	0.508427
Becn1	327908	119552	114757	229210	133781	176782	104719	152008	91215.2	28936.2	104657	135954	214247	311866	199571	63101.9	114913	299440	88829.5	135044	20996.8	242808	94851.5	146375	270892	242382	244836	95767.1	133874	321724	80189.4	181418	61468.5	153754	50751.4	138587	183719	117270	-0.059	-0.2822	1	0.87451	0.740825
Usp2	339993	339782	451146	220082	228661	627718	309067	374581	153018	209512	365580	229099	379396	468886	241348	171605	323466	189805	115596	387917	240298	309532	313078	484037	205727	302508	58900.5	110710	823029	460324	537632	48517.7	252660	152089	157796	296247	456985	207550	-0.108	-0.5252	0.965648	0.892643	0.612006
Gosr1	2752757	1830260	1231974	1005507	1449739	825004	1741708	1837500	526221	1713247	2616592	1594624	1062317	1189136	356710	476428	1274831	2619547	319761	625835	1585841	482946	1592641	2783832	1441488	971696	903453	1448459	513213	629660	1422963	1532971	7231400	857966	1228706	970523	9110101	340279	0.01	0.042	1	0.821034	0.834422
Lamtor3	3062646	2338288	3524637	2991180	1641821	4684866	3914658	4776451	3545857	3157670	2212406	2249809	3634258	4136213	1160646	2711392	3622219	2117911	1391838	914764	2758899	2435294	3412004	2193583	2069123	4244450	5262364	3006355	1930826	3930192	4131683	3173380	2825415	1092204	2712318	3662828	2807371	3520247	-0.042	-0.3781	1	0.88346	0.696771
Psmc3	22705970	17963060	15628020	12769710	6587387	10608940	17364530	14015680	5844944	16307830	4718467	8027981	13154790	13421780	2497628	3554518	3747581	2987825	3458179	15320680	13318240	14662380	10806460	16876210	11022320	13775740	10694290	15051090	2552623	5662079	14059220	5400682	6212812	2666549	2506154	5558107	5682426	7627805	-0.055	-0.3057	1	0.876918	0.730865
Clpp	86742880	47816660	38437650	30467320	9453282	60857310	30399320	32155560	26113660	20651170	37759260	37671720	20707070	17303930	33606510	20363110	17935170	20898680	7765597	75015280	46139760	35682510	19370650	76524420	45045780	28460230	47443480	18767280	62997190	20987740	35544520	16266090	9520549	30495970	22939010	26845710	21612830	9844564	0.074	0.3521	0.975671	0.711949	0.873954
Stk16	161632	152863	185447	86361.8	156589	59352.2	26965.6	275774	130284	119848	17695.7	165440	165763	302795	115728	66177.1	189499	111540	110782	74495.6	123721	132319	128008	128301	20193.6	152458	66039.6	60539.5	65146.1	110057	140008	68563.7	106302	42509.3	64717.1	236930	319642	152058	-0.181	-0.9688	0.58156	0.880741	0.321829
Hsd17b7	37902070	46541260	62021600	50054800	49341840	43314460	37348060	55870170	48411490	49610030	31644800	35022280	71102500	93196880	51261540	46454980	77807210	58006650	52797320	40233030	37430650	59506940	48617850	42596980	29926180	65247840	53585910	36295600	34620580	43556350	62338710	68524660	48108770	50561750	52705290	94671900	75508190	64002880	-0.005	-0.0553	1	0.841905	0.813564
Tom1	2215488	2825095	1175406	1661581	2745522	2986841	2956033	1010895	2641060	3694908	1090047	2443484	2206431	1918001	1230119	1002044	1855049	3781021	1791643	2056558	1642405	2906583	1559603	2591000	2888183	2535787	2560871	3951281	1299229	1627647	3120595	1567934	4457362	993946	3181058	1740901	1968643	4890266	0.13	0.9114	0.659093	0.364819	0.874209
F5	5661551	8657856	6411936	13268120	14431760	8748558	13506470	11984720	17938030	22676130	3174098	6535237	8128784	17458820	4682552	8973895	11041010	9567463	13832120	5829364	7154974	14146770	7234482	5977253	13074410	17761950	18412950	13519150	3142590	6914758	12352700	11766740	13723370	3993899	5198956	24690480	15938130	15101000	-0.011	-0.0842	1	0.847181	0.806341
F11r	17928710	31421730	22599320	33954450	35544170	26218350	32170990	31913390	26795920	33520390	14983010	24309230	26583610	61180560	18442040	22975010	26263840	31906740	24731500	14143740	29462800	37480410	33252690	20040230	29762150	30269930	41523620	26173280	20286970	26820850	17529890	33620910	28336410	16712800	15198790	33484420	44261500	39023200	-0.025	-0.2883	1	0.875149	0.738289
St3gal5	16431590	21121030	19206820	197054000	21103650	16164910	26078560	21428730	30847680	27380920	12020530	16802200	26787480	44357290	23293570	34793770	51951790	31830560	42725930	10039640	20757270	19201380	20449750	21425560	14882540	33098930	45017700	17724300	9746650	24975370	34506200	36089480	27765610	10373860	29282750	45312750	62786650	56993590	-0.147	-0.8877	0.662648	0.886156	0.371683
Cyp4a10	67091990	100946300	173239000	65259880	72529810	102390000	140805500	116771000	222496600	156615800	47686740	51634640	173584700	293055200	121220300	124656700	185762900	253061400	155365200	79799900	95321180	62615710	177960400	70314890	71721830	152976500	300338200	200969500	91142130	79999040	262564600	195626500	279708000	72618420	151933700	154788000	127189200	382032200	0.092	0.5524	0.909631	0.603742	0.882038
Idh1	1507360000	1741337000	2377375000	2287086000	1092642000	1485815000	1940158000	1632558000	1866060000	1895452000	757519100	940005100	897478200	1239481000	468808800	788062500	535313400	746109800	668079500	1472155000	1382937000	1728206000	1748641000	1388597000	1424541000	1829872000	1966870000	1664650000	708826900	1203752000	1135695000	982122300	1176136000	602653200	770319800	693183100	684903600	770849400	-0.069	-0.5556	0.949841	0.89366	0.592602
Rbbp9	297854	192762	499965	581020	407101	538528	458436	442500	36812.7	302911	739804	420612	713099	369422	351853	373628	223464	438015	274135	522095	599820	643349	576127	981614	801419	538634	877732	485915	769420	703008	865378	796280	213477	256687	661422	698792	663033	768116	0.544	2.8677	0.000135	2.6e-05	0.828955
Tpst2	649526	461348	138353	312543	139422	56880.2	224820	90208.1	241687	188045	110107	317670	269085	758057	299926	95690	697743	178453	420417	332654	142473	245494	222592	272189	189916	62621.8	518913	341924	59517.3	354976	442520	428787	300149	112518	197736	119547	289044	449008	-0.031	-0.1297	1	0.854742	0.793888
Dhrs3	2893223	1781604	1299792	1758732	1726139	2063406	2265806	2865422	2757539	3120030	1806787	1505802	3074057	5430722	2885454	1385229	2908671	1585147	352206	1807222	2042919	3647870	2204637	2820790	1138873	2249555	3449874	1355058	1755011	1634002	3599431	1675364	3267843	1567646	1586907	2630664	1357580	1640880	-0.008	-0.0591	1	0.842621	0.812643
Soat2	35805590	188493000	149336100	141620100	149266300	79237110	151674600	165525700	130323500	133837700	57417490	155654500	144055000	373957800	144104700	231191900	226518900	152196400	213505300	44323160	150041500	179342400	123483000	61801560	135382100	146769100	160889900	156376700	32769120	230716700	197280000	287848300	185014700	49392310	114340900	329913600	203648800	262240800	-0.046	-0.2883	1	0.875149	0.738289
F10	24511130	12554230	9041623	6520623	10205800	11923290	13013330	12097220	6416634	7520033	1947512	6183719	7952683	17484080	2680513	5558596	6204939	5503467	6052287	10602780	7569097	9997892	6363013	8677413	12415770	10521800	8677098	7692430	1703568	11577160	9274783	9860098	5853139	1366979	3450843	6165773	8968025	7136176	-0.143	-0.9084	0.641755	0.884848	0.358657
Gnpda1	921832	1783081	2586671	1500557	897734	1370950	934519	1458075	597742	1547505	982536	1451680	1471226	2644968	809323	583679	880481	1231146	717907	1492943	1397850	1547566	1127288	1633342	1439791	513221	1164475	1330595	820963	1199815	2055731	1522690	765017	512814	591181	1964606	2029147	2054666	-0.003	-0.0238	0.999994	0.835697	0.820874
Cyp8b1	65822320	64661970	73599070	90608620	57961510	53158780	50993550	55718000	61752110	80833140	47883020	45691340	89748210	130634600	67411270	51753610	99666780	104903800	81828530	49135650	53832170	68784800	103982000	50599410	36523070	81398680	96930980	80184410	37025300	60781250	146227700	128998100	95189080	57307960	43169800	59814550	176091000	98712660	0.008	0.0724	1	0.813403	0.839968
Yme1l1	11733300	8375695	7587735	8716535	3329035	10278870	7216964	5741824	5288075	5728368	8267027	9747720	9206017	6887586	10681090	6937968	6475703	6080675	4427142	11359030	6123796	9877532	5842692	11987690	7264266	7101254	8721417	5115926	10156990	6256362	8957269	5886083	4017530	11332250	7226218	11616860	8156141	3356834	0.019	0.1437	1	0.7931	0.851422
Tcn2	1110504	183148	924250	682910	422149	469918	1884711	1710266	1395406	2766677	344084	237145	385030	1287793	755783	724506	572599	850123	1458467	664537	530800	1640945	1495852	1532010	1769451	1741991	2789940	1790526	891608	716900	1413616	637298	290054	578070	241886	526739	438100	1243180	0.168	0.7774	0.773796	0.4557	0.879638
Stx8	4515378	2953714	2784878	3773784	2696503	5838569	2428861	7487013	2491949	3621551	1597517	2942327	2876739	6162092	5087309	3927720	2985618	4501819	2995462	1780016	2203720	3706524	3456577	4709441	2786609	4812705	3416889	1823063	2158603	3337812	3951211	3846201	3655103	2686954	3214507	5545142	4783042	3717606	-0.065	-0.5934	0.926758	0.894478	0.567883
Gcat	340805000	240862500	190589500	115991300	42287280	207390000	115623100	135525500	111767600	72445850	151180800	144225600	72129240	81406100	110814300	81594910	71662880	97058990	33358550	259316300	185716400	122539400	69083690	326342600	164712400	135956500	173402600	99527130	211280600	117912000	124515800	59696060	48100690	128063000	116384000	103444100	88759140	37765030	0.053	0.2698	0.991047	0.747934	0.866946
Cpd	1209661	1096383	1130233	1524629	874700	638262	1900360	1095890	1360855	1824107	56198.9	82015.7	2145058	902783	67443.5	513047	1702029	1084753	693311	643870	604517	1421602	1218731	1451999	1422286	1588202	1425213	2007928	450840	214398	2363176	782172	757814	109002	337796	765380	776401	911099	0.084	0.3166	0.983197	0.728098	0.871222
Leprot	446697	695990	379238	261697	782832	411337	219014	533489	250159	365674	75156.2	363550	269444	1236979	645595	1166106	974601	811575	1022387	343073	422476	650709	426036	278641	333323	472193	306564	189923	387764	819759	640178	968712	352075	461204	540534	1468584	1289174	638482	0.024	0.1226	1	0.799481	0.848245
Abcd4	260586	297664	237544	213040	240443	101828	341012	168151	83559.1	201295	52731.7	77812.6	78906.2	417442	83688.9	144614	95872.5	132948	252496	229517	133471	166138	261035	36693.1	127016	162433	111925	174003	49188.3	144936	27796.9	141388	176284	328441	111408	99406.8	158465	104906	-0.262	-1.2477	0.346896	0.860597	0.178178
Lgmn	47362030	51152860	97223990	59006290	109783900	32659570	32202900	141907100	43353430	32384440	39403370	75338340	172236000	191644500	91304390	128231600	183625600	205607000	272272800	31312450	40224200	142197900	97176280	35613660	35159250	64630100	81064130	36038250	57834880	121119200	125221800	167163900	88798620	86828740	81116750	332596200	224753500	110613700	-0.046	-0.2005	1	0.86489	0.771591
Afm	1959063	6015201	3295501	14855060	7659107	2375436	4817342	3694019	10775650	3587197	1327549	6179525	3460822	14669550	3113822	3638402	6044311	3367414	3947053	1604300	4810930	7306365	6830547	1887676	1833170	4563143	8719129	3623540	1544933	10628160	4302868	5299706	5970871	2298699	1789068	7293332	5467709	7461319	-0.11	-0.6418	0.892134	0.894813	0.53555
Tpp1	177291800	210236500	294980500	241188000	327486200	245645300	202173000	310221900	222005200	216317500	360456900	359511400	426945100	619702000	653705300	659708600	718876300	600298200	570228800	151041800	177811500	253998400	266949900	192197500	220637100	238836300	331829500	167227100	451703900	565187400	473459100	663637400	314032100	545570300	533774600	897159000	603140400	617931400	-0.027	-0.1496	1	0.857783	0.787996
Itm2b	96737050	73516530	29942720	50511870	22812630	134569100	146047300	63666810	133652600	173376000	13205380	14599780	19558440	40012330	18682160	21634100	36294610	29277480	40999870	63825900	47174830	78825200	53323100	138437400	138518300	117964300	162487600	104506900	12762750	24504860	32375300	29014240	26262080	17024460	17997130	46133840	37034900	33740170	0.046	0.1888	0.999065	0.77833	0.857657
Coro1a	4004010	2495977	2116026	3906225	1748009	2543617	1724573	3005054	1362467	2174183	1103174	1718154	1655344	1967202	1193741	2316053	1294257	2077724	2575630	2059549	2403233	5236681	2425570	2786171	2075280	3509711	2535264	1930687	1249924	1165236	2045992	1749491	1381198	1153317	1348297	3610740	3234173	1245109	-0.015	-0.1594	1	0.859225	0.78499
Cope	3537341	2488922	3187536	2320296	1336362	1297810	2150907	2914639	2003858	5636852	741362	2657027	3149761	2211554	1635258	2050956	3066482	2035421	1320402	1822597	1405665	2790276	3730990	2055864	1484923	4112141	2901946	2302109	2332398	1239799	2368844	2015965	1324784	671260	1113458	4395031	3010365	1521978	-0.111	-1.0259	0.526797	0.87659	0.28879
Lancl1	456243	1403431	2860456	1745658	1727743	591389	1456180	2462553	3424810	2791033	774654	1361652	1713823	2653162	1216444	1651668	2713855	1962256	2065637	740380	848475	4751892	5399846	606770	1741953	1478503	2039390	1961808	990738	992886	2349598	1481999	1846642	925198	1406987	2338475	2791778	3077285	-0.006	-0.0325	0.99999	0.837461	0.818912
Cyp1a2	512258100	766144600	1325240000	883268200	609329300	615507300	729036200	1091225000	758372900	871598000	333942100	684950200	1551825000	1852253000	590315000	824479100	1264401000	1099140000	1035427000	460199100	881808900	992576900	915080200	475339500	838995200	894265700	1343958000	894748900	213160500	808776100	1701295000	1425327000	1154447000	404301800	709441900	1831335000	1119489000	1191426000	-0.01	-0.0709	1	0.844801	0.809729
Adh1	6402531000	6022748000	3726208000	3578983000	1466711000	3517531000	4388767000	3970895000	2477074000	4763405000	1372638000	1725980000	1970324000	2982260000	919663100	1877189000	1215660000	1512214000	873439200	4920216000	3378966000	3290736000	1839388000	4710542000	3192012000	3710556000	3483395000	4125219000	1065133000	1864843000	2469097000	1864511000	1616520000	1296444000	1270541000	1385712000	1665934000	1854385000	-0.071	-0.4537	0.992773	0.889005	0.655416
Dhfr	20968510	17047730	8608991	11368230	2496251	10521070	12022470	11434310	6402369	18209930	2364970	3227876	3116784	2627443	886718	1521248	1636690	1433305	947112	15624950	9678316	10686210	5558742	16974070	10612940	8471557	11071550	17229690	1698175	2023998	3507019	1328712	1962060	955295	1191256	1632678	1537261	1288646	-0.135	-0.4246	0.999836	0.887039	0.671997
Mtco1	24085610	25696500	13216520	19897070	12286360	37714930	20343670	6031377	27920540	20194650	28262990	26068400	17018630	23147490	31347980	29430500	37278000	31779680	15308250	26189230	20306290	37387070	24312090	13763870	22762660	12883900	37046370	21480440	31454660	26354110	34651460	32393120	19591360	43313800	24541880	40160040	37600270	17282930	0.172	1.1157	0.476765	0.23875	0.863384
Mtco2	4098547000	2645247000	2825899000	2437603000	1396318000	3142031000	2170126000	2333433000	2219861000	1676868000	3537462000	3244455000	3562039000	2944259000	5019867000	3910873000	3589616000	3545028000	2718128000	4018906000	2802066000	3205858000	2180999000	3804574000	2540865000	2033110000	3193190000	1652932000	6132435000	2983131000	4260133000	3319804000	1711352000	5831157000	4395683000	5944947000	3837634000	2301798000	0.085	0.7805	0.771363	0.453575	0.879539
Hprt1	4788565	3051463	5092014	3429634	1727406	4651311	3582863	4392123	2547086	2939485	3338317	2291178	5690167	4854413	4463567	3938944	3631908	4035948	3156246	4233745	3372087	3747778	3139707	4711499	3640024	2570310	3216477	2821115	2687049	3564394	5668760	2747252	2177955	3495847	3381831	4233183	4779572	3566857	-0.056	-0.5895	0.929308	0.894416	0.570459
Amy1	5469864	2822634	4996568	2491304	2113251	2906009	1993330	3654076	3042898	2549612	1273053	1869082	4066288	9019215	2295438	3001262	3360452	4898128	2993210	1420359	3137650	3147701	3389411	2669352	3488010	3688957	6595638	2296283	1524080	4533226	4603901	6314213	3935940	1272061	3526251	6587148	4822438	4555639	0.091	0.7333	0.806838	0.485869	0.880866
Amy2	271830100	34247090	1736934	1263564	1651020	2683384	1635368	2212030	2941997	2138762	1509745	26907060	39320440	3181023	19478140	1934164	1298621	2169361	3771311	3411292	3043078	5668343	1991440	2926022	4574711	1079672	1491146	1423867	1893297	14250700	2276084	2876515	7754359	1910966	1989776	4685669	3147552	4020371	-0.428	-1.1781	0.397439	0.865366	0.209831
Ca2	5152517	2217043	2169437	2123774	581743	2757352	4719006	1814584	1620876	1495794	2399350	1915190	989980	1695542	996091	389494	735763	1533916	588094	10052940	20912160	2922195	1115941	3423024	1231653	1475424	1889648	4097422	9697132	3057862	2039699	792033	1065840	575210	714734	878158	650000	1015902	0.233	0.8198	0.739413	0.426654	0.878169
C3	1660062000	1315267000	1614544000	1596601000	1737808000	1943168000	1588998000	2090704000	1932322000	1859891000	651903400	1075491000	1806484000	3105021000	1731701000	1753320000	2923867000	2084108000	2479458000	1335057000	1377288000	1600392000	1283947000	968686300	1612301000	1944623000	2261273000	1430538000	528101400	1682178000	2119805000	2212873000	2063751000	681492100	1601408000	3463746000	2554791000	2439605000	-0.115	-0.9371	0.612953	0.882944	0.340929
C4b	379172200	274741200	210748600	393533000	299169800	421667800	385584600	349673000	394381700	515559000	95124410	145363600	266995600	355995900	171347600	252470300	371995400	310911400	421321600	214138700	199154200	469467000	313960400	383506400	455219900	441694100	445612400	346888400	56899680	217007800	301507200	264763000	251766600	73289010	180332500	443678100	482404800	342808300	-0.085	-0.6032	0.920186	0.89461	0.561388
Jchain	6802608	14984260	3814169	5268932	5952674	4568848	10481970	7840528	9879148	9990046	344812	6542833	3357922	14830700	145104	1620812	3082486	3789957	3293678	4409343	12215180	9461817	9225404	8467456	5371610	9733763	16302400	13005430	620508	6345278	2549310	2596109	4415850	745873	956115	2030011	2962320	2812326	0.002	0.0055	1	0.829465	0.827182
Igk-V19-17	1150881	4537374	942410	2525013	2437335	1616470	1695380	1832045	1936867	2795578	309062	3662756	4148224	10775660	869352	523884	1265533	4767884	2446408	246390	4159252	4549006	12740070	2293760	797488	1257283	4162591	3923612	1252956	2256005	1336717	1360912	1172586	815271	946490	4125360	1289250	5243752	-0.025	-0.096	1	0.849227	0.803242
Gm5571	99772.9	4130540	780369	333661	302195	63082.7	196289	711741	1984213	696835	369856	2483125	1624442	1684716	88161.1	151214	241137	429524	637711	379036	1290436	314147	229895	450587	57721.2	154066	317799	0	113776	65434.1	102351	438627	248078	113137	91059.4	758958	251809	230821	-0.861	-2.6877	0.000591	0.829099	0.000199
NoGeneName	2771027	9108911	5421797	10534830	5576323	2049869	3513806	8838173	8162824	3672731	311599	12609880	17493970	21868880	2084950	2360943	11310230	6826641	39687030	981124	4026932	9576186	17384070	2998670	2916653	6623999	8103379	8423365	2284782	9671730	5481967	4574977	10530320	1015740	1529303	22675780	6856681	8332758	-0.148	-0.5426	0.956909	0.893264	0.600958
NoGeneName	1230957	1760612	1945963	1175705	1031784	1108603	1082218	1295616	1027405	573526	1039798	1121301	1187102	2250711	1447841	1948618	1056891	1624879	1495847	1032160	1341005	1570310	1020936	1101832	951609	1224257	858900	596007	1147773	2836817	1642779	1742538	650024	1849950	1972975	2894532	1380607	910322	-0.015	-0.1053	1	0.850797	0.800737
Igkc	7064936	28585840	20266330	12816360	16525000	4076927	17185310	25619900	15404290	11340090	1576453	28991790	33311560	88596250	3275542	7104966	15221570	27135450	25641600	5110481	28177810	26783300	25329410	13198510	8287175	18433970	28700760	17788750	3275534	27216730	13860080	18411110	14458580	4562487	4678605	36089050	18641350	19029150	0	0.002	1	0.830233	0.826452
Iglc3	249757	1112220	428453	499215	367737	449550	539057	407780	404082	642814	193090	408007	283371	6676960	54111.3	363552	150261	726774	227355	495772	746845	570520	288332	255245	510829	223730	898287	579460	175756	551239	405349	152052	413821	156715	200016	465368	165104	321012	-0.172	-0.7898	0.760545	0.891356	0.435541
Igh-3	4396972	32875140	22086490	18249940	31141950	2528456	14716310	38010790	25195690	7066751	2218083	47792360	71401260	533880100	6716466	8714171	33491220	57416480	45026890	3295049	32825660	43859400	61112620	4266813	5116859	15241470	33017270	16949910	3388994	69783590	26213140	48870240	26890790	2722432	5342477	74377790	24299120	33589880	-0.201	-0.5772	0.937101	0.894188	0.578547
Ighg1	4627487	16446320	13298000	2417856	2165513	3704458	2840990	2458112	2214737	3550520	1248612	8267381	6047371	15201890	3292705	3381969	2094281	3310878	3003989	3729962	11099730	2763984	2104132	3403200	5514948	2939430	4018796	4359395	4348319	22039420	16423130	5317962	8862281	1503319	1857576	6765900	5053018	4958297	0.159	0.7435	0.799464	0.478908	0.880611
Ighm	66067120	530042700	246572100	132508500	612212800	47863620	254079300	196790600	279827800	62701430	22556340	591330900	384572400	2040673000	47201980	70830480	147862500	504786600	510627400	79764160	461084200	322709600	493725200	177291800	65311920	167169800	451782200	282999100	27963460	670581100	175469500	352044400	164665400	44728440	59876310	259398300	434603300	335517300	-0.025	-0.0827	1	0.846917	0.806729
B2m	36638740	43899000	29384170	41025580	24772290	19682130	25532900	25721730	21012320	33421430	5858790	15478140	23096080	36895970	6875475	12156840	14942830	23082770	25249330	24128600	29751600	29326570	33743830	38536110	24295650	25074530	36336790	35106590	8364354	12977430	29357630	20981800	21016170	5415782	9502994	20294100	23751310	19990870	-0.025	-0.206	1	0.865604	0.769697
H2-L	129932600	174569000	241765500	306205100	283636200	108062100	114914100	317367300	109870500	162957500	80589260	105124900	290099700	246756300	91553850	114201400	207953200	179040600	339777600	107412900	112005500	428939200	320445700	161045400	144810200	170657800	186026600	130869200	61096250	120717200	198983300	142880800	118368600	74922020	87512390	425887900	436757800	132625000	-0.092	-0.672	0.86801	0.894631	0.515139
H2-Q10	26736000	47501700	56115340	53773870	105790900	43737680	64787040	70910010	57765390	69109480	17805630	46003030	85850060	129863300	47761880	78591790	102548700	75237990	98362550	22599470	47627140	72791480	78158680	42285980	64942580	80956060	76758770	58523870	13818170	87372020	107968900	99542110	80189950	40222520	77727880	157156000	119831600	87435360	0.066	0.4247	0.956313	0.676009	0.878243
H2-K1	285958900	337947800	353678600	409844800	423658600	221148300	242557300	506729100	186610100	299393300	125238100	192581500	449354200	452285500	157034200	224916400	358319000	346403500	505593100	215922100	191573900	588416400	355417900	382441800	292977400	392125200	344605400	210938500	109533000	280925500	277089600	277286200	179685000	158507000	192979000	746931100	740712900	325666100	-0.071	-0.5503	0.952778	0.893506	0.596019
H2-Ab1	955802	7971522	10610540	12351800	12593760	3466085	1969476	17020760	3676527	4837185	3784555	3592254	20174730	10025930	5082318	2682226	15437560	5240684	44106650	1196640	7386444	21396780	15696600	3410502	7528088	8615137	17578790	7119921	1713083	3976532	7972511	5320707	7840553	606882	2906360	52115070	25084310	7981681	-0.006	-0.021	1	0.835121	0.821497
Hba	1748199000	1235239000	526613300	478317300	202248500	602767000	1567362000	448860200	536809600	540035000	102313200	628456200	100915700	259468400	147625600	164298400	75491780	163686900	147299900	2398180000	4514639000	472371800	326848200	2448918000	479854300	500376600	794158400	727108100	1075059000	805992600	127252300	112539000	149928200	82325070	132428500	110710700	262043300	157403300	0.186	0.546	0.912392	0.60762	0.881949
Col4a1	897466	112743	221406	401585	195993	427918	99355.4	343637	221361	149677	379437	146977	251034	498245	368463	267816	156962	187215	265497	1095050	284237	556755	74704	496567	281677	240736	310387	253644	1248288	105862	237206	356421	122439	358795	287429	1181158	128276	151300	0.182	0.7832	0.769232	0.451724	0.879453
Krt10	358171100	389430800	208711700	120909800	71872240	211896700	220898900	586873100	69859950	41484430	300929100	287657500	197705000	91984490	216093900	292307100	239326200	60997050	123613500	172173300	188742800	116534900	50429030	100598200	149416800	158391800	100769100	60708080	353865000	321615900	132883000	95534500	101342100	181960200	234558800	249884600	496419100	69862630	-0.179	-0.7066	0.838368	0.894073	0.491666
Mup6	84837230	89389660	101537900	47456250	92159780	83089310	52973790	76794350	79608330	102036300	69418620	87857630	93568040	188091100	91190580	127817500	119040300	205316900	57593450	62745990	49593860	21846320	55477730	35672010	43122900	191004700	105364300	49544490	44715670	45272270	135599300	86423370	76837530	63641230	111268100	103202900	176108400	135616600	-0.281	-1.8158	0.06889	0.836793	0.027403
Mtnd1	43068810	50287590	39323330	52033190	21580550	61974630	37323050	27621330	39543620	33128310	68784570	54875620	38022150	34738390	66239190	67070410	57945480	57581440	38135830	67788010	41405210	42005790	41663180	61178010	50373410	30399520	50768470	34549790	104115500	72203090	64755680	51608340	29449700	82144130	65444210	73456980	49350350	29146870	0.132	0.9488	0.625128	0.340277	0.872357
Mtnd2	1139653	1865920	1184275	46167530	1150671	2370957	1207113	2383535	21209130	34870760	2185954	2392578	1644164	19611700	2738717	3376399	34373400	2303818	80022580	22697900	1582043	5341410	44719550	3517836	37180960	1142495	14439170	1385271	2480024	1736909	62597630	24889030	60295830	3069979	3149139	3058124	62247200	53563680	0.605	1.344	0.296186	0.128673	0.851943
Mtnd4	23042760	18482750	14249920	16437440	7673257	23594630	13936990	9295958	14866600	11464640	25677460	20255520	14464280	12506920	28264390	22943650	17632100	24927920	12950170	25876650	17225630	23695860	17205370	20652720	14015060	11008680	16567020	12898850	40918470	28300190	22088700	17218460	13922070	28642460	22500040	27018350	18975570	10588320	0.151	1.0128	0.567081	0.299639	0.868992
Mtnd5	19743880	52408340	35753730	58747590	26303840	60416040	45207150	19685550	82807350	56185690	56258960	65904260	43783090	53913740	78382380	60865390	67844380	76176110	33967010	62725390	54028700	68859980	60735750	49217990	48781630	41228190	84466110	65311560	46855660	46368650	69265590	57368520	44780430	91728920	50038640	89866240	91585420	40144430	0.188	1.4421	0.229434	0.093573	0.847859
Mtatp8	83055480	48377640	44077650	62513770	17172410	58863030	36737710	32639420	27157740	24818980	33627440	35634980	24884110	18796020	33365990	30475520	18399250	28251020	16147210	63374520	33223750	21856780	21590410	74533520	45033370	40913890	35755970	35762520	39377330	18677750	29836120	26445270	14722110	33587700	28576960	22413840	17364740	14969840	-0.096	-0.6055	0.918609	0.894636	0.559859
Ada	28827080	38240520	36514810	36608060	9041067	35944550	37026070	29800570	27211260	37517800	16017410	20670550	29603010	44358700	20056960	38616800	34912900	31095550	34640880	17705640	29993550	23049210	30109030	31883350	31992300	17671380	42573880	33151530	20215080	36370640	30671120	39539930	26318660	10137890	25766250	38329300	31039470	41241460	-0.061	-0.6827	0.859055	0.894497	0.507885
Krt1	445340400	512032100	348530000	175832900	111524700	256625000	317649600	688129700	89595410	77950520	431731600	567196600	384368900	139583900	319888200	514633700	319823600	108835100	229572500	321765700	257272100	168535800	84703300	189651000	224231500	198284100	121285800	106606700	383459300	378040600	244438300	127742000	122495300	240281900	387794900	361605600	477566900	111538900	-0.268	-1.2676	0.333297	0.859304	0.169642
Fabp4	15477120	10312300	9981659	7269756	4037358	9782394	7327155	6677224	5055776	12213060	32842240	8474590	13457780	12195370	10989600	16716510	6802541	5851526	7864133	16616920	6147772	6295391	6266337	9501523	7095276	6477616	6796859	2796647	22988480	5544881	11831050	8549178	4597198	14483990	11669080	14700860	7977756	5932916	-0.148	-0.7611	0.788227	0.892496	0.454788
Gzmb	269554	440031	441343	1460901	827111	251274	264296	960039	295694	207695	183983	350000	494140	474616	222462	367071	464319	195321	2588680	161368	438977	1689918	1578703	539101	395057	726550	607156	527241	337112	293446	580396	151991	192796	327380	112235	897328	1175781	448067	0.059	0.2662	0.99155	0.74939	0.866585
H2-Eb1	196694	135202	231237	470630	328750	0	0	435060	68240.6	11183.5	16242.2	25574.8	479924	300037	64880	10899.7	477573	83378	1019970	0	101625	990401	375551	75836	122422	125621	444120	137568	12776.2	71676.9	184387	74510.4	158106	27523.8	128169	2217352	592126	87519.8	0.344	0.7168	0.818403	0.497092	0.88124
Cd74	1293714	1327156	2768622	3677101	2115801	771535	968569	2126117	1253458	1966997	433773	1119505	2950229	1515222	750345	1316973	3758703	727166	5841589	1788076	1206272	6364843	3573776	1075266	1040632	1345740	4471999	2073431	942235	341836	1498961	1582973	1481955	894527	249538	10435070	4687377	1532399	0.037	0.1777	0.999656	0.782109	0.856193
Araf	2702063	2508830	1584059	1496003	1158923	936591	1081737	1770961	936918	813361	482190	1197756	1244106	1820915	749380	1501056	1169019	646674	1144214	1167359	1248905	1163428	882007	1837672	1544030	1205397	797698	371530	891477	2314436	1579143	2014885	694840	1376076	1097592	1250927	1349368	1178056	-0.044	-0.3251	1	0.878796	0.722244
Slc4a1	108688900	353352600	435992200	251946300	266604800	113682500	620715300	384295500	270198900	221715300	172403700	583843400	351008500	497725600	237642500	283186200	508974000	429566000	390567200	137803500	474458300	370573500	107860300	139900300	139959000	406040300	309739300	165102800	249121900	889991100	665588700	475357200	275628300	114677100	176701400	373980000	408503300	300088400	-0.162	-0.9265	0.623559	0.883659	0.34743
Mup11	84837230	89389660	101537900	47456250	92159780	83089310	52973790	76794350	79608330	102036300	69418620	87857630	93568040	188091100	91190580	127817500	119040300	205316900	57593450	62745990	49593860	21846320	55477730	35672010	43122900	191004700	105364300	49544490	44715670	45272270	135599300	86423370	76837530	63641230	111268100	103202900	176108400	135616600	-0.266	-1.6292	0.132493	0.841966	0.0564
Mup3	65294640	120466600	176987600	70043590	81886500	78781850	107586900	226059300	106211800	151694300	64296950	123892000	148378000	215096300	143748500	158924900	225098800	114146800	116391400	49974410	92747010	61017350	63502470	52410760	110468300	171016500	157107000	134765200	47601210	74736910	277319700	146838700	120077100	62132280	108044700	266849100	137385000	166364200	-0.17	-1.3931	0.254295	0.851991	0.121196
Aldoa	51687850	34061200	34167580	22793900	5803608	23713680	21457880	20639020	12450540	22506990	3911178	10531730	7880738	6611625	3299335	8082843	2510795	3928272	2567430	33591570	22554310	16279670	15986150	26128720	24850640	23172230	15926600	15476340	22752840	7262328	5125563	5176315	6925981	3643387	7119671	3644087	5599526	3467368	-0.006	-0.0219	0.999998	0.835307	0.821297
Got1	550189000	576911700	1045916000	604215400	319194900	459854600	554884500	647052900	444514900	648710300	247659000	409486700	638563900	654139000	118727300	295523800	288921700	451020000	159872100	402596400	461318100	452017400	433048600	472891800	473616100	560415800	693655100	538494300	183070000	330392100	913391800	449548700	502173000	290951400	220886200	224030200	422762800	426571200	-0.075	-0.5909	0.928397	0.894439	0.569535
Got2	15878640000	11419970000	7793169000	7624589000	2194720000	12987980000	7286377000	6748191000	6375117000	4619963000	7626347000	6915563000	3204901000	3641268000	4911731000	4464077000	2744132000	3624770000	1632451000	14030370000	8806575000	6317936000	4550430000	15785020000	8650482000	6145444000	9389241000	5418643000	9559630000	5040434000	4766146000	3362932000	2559412000	4959506000	3683902000	3569180000	3365666000	1870835000	-0.026	-0.1569	1	0.85886	0.785763
Cela2a	130594500	8206579	696614	1211831	628392	2877096	2251245	975568	3024863	2434786	322251	6725328	4246902	1449548	4831506	1453342	1116560	1429951	783512	2879144	2095919	778402	1065322	2646982	2606273	1386140	858133	2920376	788707	3841356	2614203	654816	1264618	893067	1386644	1583205	1144310	2078226	-0.41	-1.3261	0.295158	0.855712	0.145888
Krt18	521384700	241261100	350611000	264927000	121335600	357227700	116950400	325113100	159524200	202885500	227774400	211683200	275866900	221728400	328151300	328205400	212379300	245636100	211744100	729015400	291945300	343884200	230378000	354400100	303067100	194694800	207182400	202794600	423540500	114449000	294234600	257861500	119318300	248353900	302834200	404759300	271783000	223080800	0.073	0.5616	0.905572	0.598124	0.882149
Myl1	11151010	4891104	512613	353614	234388	147274	5893850	384336	317306	118425	127187	379739	1399873	621163	284172	921521	273853	451454	262353	3395407	555485	263466	320920	307384	859027	487399	280444	332773	198768	580058	588172	322047	341770	132307	7240974	204439	600089	206493	-0.216	-0.598	0.923702	0.894544	0.564838
Ldha	847317600	930608800	1195286000	1062316000	779109900	798105900	1066497000	949840400	970606900	1177963000	578929500	629879200	974059500	1213716000	511126600	721872400	615012800	755706400	644599500	713009100	691737000	1075769000	984203500	666454500	689687900	910226300	1025575000	1151599000	461651500	676785400	1070952000	901074200	887428700	596584500	585265700	651415400	858108600	1108537000	-0.062	-0.7636	0.785845	0.892405	0.453105
NoGeneName	1858339	9867755	11771140	6832722	7610455	3075644	5519424	10535910	8916176	4329910	1510007	10242030	15972750	26535900	2596613	2942039	13708940	12812510	16647510	701592	5586937	14120930	14791360	6678609	3350891	6021955	8340547	6512588	2269336	8204786	6501293	15478330	7695336	920801	1894021	24576880	14561840	11666970	-0.168	-0.6237	0.905702	0.89478	0.54771
H2-T23	8245515	15804130	14094410	33726680	21231940	7393081	9132885	21457620	5992459	12294860	4733962	10366240	15181460	25016180	4913096	10964730	20254720	15887410	26739230	8042591	6893699	34516770	19918380	12367620	18012310	20097960	14755890	6713436	4795152	8208282	6819726	15454260	5410077	5531971	10314260	44342390	52138930	11369310	-0.056	-0.299	1	0.876246	0.733758
NoGeneName	1556688	2914204	2358251	11988130	17543930	2574731	2058430	6689361	3803183	2475079	3925276	681386	16537000	8673336	1836707	1923357	16178230	5204702	49196220	1735719	2856181	19737360	14203250	782664	2353923	3441003	10675280	3806204	2753488	2705925	3482270	3301825	6458711	1201267	1496811	47536140	25095550	6115350	-0.028	-0.0868	1	0.847637	0.805666
C5	20297150	25286280	31647230	25099760	30612080	25171410	32980780	33028760	30900730	38956420	10713870	17616100	31168590	53889590	19392950	25870940	34854830	29562610	33326920	18820990	25295780	32610660	29458340	23367120	23344140	36045250	33385480	34118050	9179451	21472680	39006970	42195350	26263610	9770715	16172530	46069810	38449940	36721580	-0.047	-0.5529	0.951346	0.893583	0.594344
Apoa4	96896080	72538890	21562740	31539250	48767270	71923160	114608400	47357500	61246630	121869100	12573660	35569120	26104570	68057090	15697630	24718690	24305980	16220670	36329250	52714380	52285340	70389050	40190470	107527300	74158680	74459340	95755130	88498350	17934700	28622900	25385730	23379920	43270920	10950950	9329311	41309800	67723520	48134980	0.008	0.0391	1	0.821732	0.833871
Gpi	76597720	80620500	58482630	61564110	28956920	50544550	70622830	77851900	44451830	93055360	24200740	32211560	45900060	70132850	16465620	23677890	36233530	36538670	32584460	60876820	54774790	74369460	46013090	63175690	46722660	63793820	62285900	78942730	23070840	33920090	46873520	38703900	35672130	31276300	22415760	44913080	49846720	41859100	-0.017	-0.1512	1	0.858021	0.78751
Ctsl	14224800	12601300	22779460	18086590	17258800	23810370	21825750	35281830	16652190	32635410	8550276	15335100	20215130	35724850	21468580	23405610	25175360	32109340	30655870	8664256	11483780	19703320	17911650	21384150	21902720	23528120	26897790	14746900	11257460	20934370	22211980	32665880	14473510	21720330	28206170	55483210	44452660	29979920	-0.011	-0.089	1	0.848021	0.805092
Ptprc	22669510	32060940	45978750	62637990	44283330	21919820	21519440	49674890	23227940	24083870	23140550	34639590	57054440	53902670	32372920	35756950	60395940	54256800	104743100	19526100	27065580	80352030	53342890	19308370	23327640	44560060	36419950	21075050	9071374	35553730	44929500	42740190	27561200	10692790	18886780	128245100	77900290	39059080	-0.177	-1.0787	0.47893	0.872654	0.25988
Me1	162818700	260051300	152359300	106646200	102127800	103124100	146700400	171051000	110727000	287970300	88969110	66021580	126889900	184040200	32905550	80090260	81026310	89258830	88056950	156207800	138183500	132927600	148351900	172817200	108989800	148617000	154249500	243254900	63371880	117053200	96143340	121777600	115719900	99161950	87447270	94701320	115761800	158238200	0.059	0.4502	0.948306	0.662475	0.879361
Enpp1	33280990	57968580	89913220	43587010	68118910	31241780	49878200	56414340	47263950	53374940	28634280	68875560	67812950	164422600	46183300	64265040	50815200	58486360	44759090	30072360	57802570	38782890	29777510	25219040	37100010	41734240	37577990	42535610	31349530	83865070	69535790	65994620	90963080	29346190	37919800	61695180	88963350	93462480	-0.138	-1.1807	0.39546	0.865182	0.208598
Cfh	54453260	89637620	40183100	60281000	123790900	60271600	107584700	87479050	75847030	82400760	13015220	49324020	70432110	162957100	30738270	53764830	116995600	63074770	90970970	36466730	66563770	78843030	50930320	59205460	70245600	119298900	94019200	63123340	13173650	88715690	60981050	65718550	76150940	12562220	28120450	120225900	116248300	82369830	-0.134	-0.7843	0.765903	0.89159	0.439216
Prss2	62967730	867512	1151141	911908	606363	936334	1401743	1497140	1557192	794928	671502	1446306	1734203	1670801	2293675	1479931	748060	825844	1173074	567731	896482	515664	1151440	3159362	1102859	1267381	1489359	1123437	1687834	1793531	1048797	733264	1011291	1176519	1594146	656630	756993	1247779	-0.27	-1.0003	0.551014	0.878473	0.303379
Sparc	30700260	16590450	4076538	8954673	1641131	21724000	29180910	6362384	14420140	15163820	1884897	2426785	2980996	2583608	1670271	1538576	1129354	2697400	2068991	15749440	4214007	9270283	3523627	26145020	21169510	19900150	15789630	13184890	896016	2847286	2554510	2468213	939234	1329716	1664670	2580107	1649696	1829940	-0.152	-0.4479	0.994367	0.888635	0.658776
Ttr	321273600	526589000	634560500	461078100	618281600	385822600	656442700	573236900	619075000	452728700	172200900	494314200	777042500	1094570000	471279800	539070500	843919500	474176000	753181600	145314700	427592500	531827700	387227300	302818300	402638800	625937100	705582700	522943000	162484700	783748100	796035300	733134800	624855000	271689900	383477800	977754000	559933600	715168300	-0.15	-1.1168	0.446332	0.869819	0.24002
Anxa2	10060930	9927186	19263270	16131150	10828850	11660090	7436505	15650050	8704933	9528790	7265335	12917430	18407750	17500080	7581764	12030210	10379850	11957460	18251100	7849434	8408285	15546690	16185530	7613238	8106280	10063050	10926220	6420348	9695865	10206230	20573340	15451820	9597417	5752949	9474178	25040890	25190400	14436420	-0.051	-0.4704	0.987689	0.890008	0.645597
Alb	3033840000	16988310000	6303497000	11664750000	9149576000	2982961000	11366300000	6185451000	9580793000	9458442000	839745300	9304923000	3508629000	15693080000	935468700	3734752000	2835104000	5782790000	3741409000	2339297000	12400500000	7711610000	6130671000	2718212000	3405238000	6513196000	11724280000	8245008000	1858617000	21673300000	4069276000	5398488000	11549160000	1050114000	2796410000	3572426000	5601734000	4468873000	-0.129	-0.5011	0.976366	0.89161	0.62702
Serpina3k	58265420	99205940	37446640	46573920	86521830	62030040	186888500	95530090	105842300	101434700	22359230	119363900	84842450	107830200	90075770	124828100	156996700	37148480	169868200	24853290	77879340	64866760	31377980	46556280	65014780	191250200	101463900	53985710	23021170	126298600	83874460	58348900	65676430	22062880	49660170	96195720	126715000	163566900	-0.261	-1.351	0.279652	0.85428	0.136393
Hsp90aa1	353804400	261815000	258060300	261216000	132494600	208165600	253905200	325148000	162556100	320397200	98447260	125321100	258497000	227230300	76803710	118135900	183303300	134120100	135417200	281539400	178225500	285113700	184536700	210344600	164696500	246402700	232608600	228185900	68792350	89912530	332381600	183553400	121443800	90812900	78012250	260816000	236696700	226039400	-0.072	-0.6696	0.86999	0.894656	0.516765
Pdia4	836309600	1368275000	2216223000	1813503000	1559374000	1004510000	1335893000	2422709000	1650524000	1761799000	580973500	1160160000	2192100000	2468083000	1111604000	1697273000	2026669000	1482816000	2074824000	688593800	1367587000	2206259000	1572371000	781639200	1373953000	2186086000	2134598000	1877556000	499623400	1259106000	2261859000	1963629000	1668284000	450052400	1057331000	2346912000	2209498000	1893131000	-0.087	-0.6415	0.892364	0.894813	0.535752
Spta1	35418380	102359900	145779100	69928100	65811990	33242100	186295200	134585400	69419380	55697940	35987630	156164900	78950360	122400400	40579610	53508890	85651220	92329220	66024480	37079450	142625400	100825500	27605540	42831660	41377850	130112200	79768360	43406960	42432570	224466000	152538400	98618630	61003210	21241780	33529890	60609380	80906120	50922770	-0.192	-1.1601	0.411347	0.866654	0.21847
Ltf	31637810	27825520	37803230	23333810	35586260	33310280	33086940	46266540	15908110	31655670	11465600	28100170	13714210	21366760	23658810	9135042	13862210	10542400	10181550	60301590	41072360	38553670	25863220	30332940	26797270	13119480	31535060	18831700	18932160	14588530	16167750	16056710	21410770	10771260	10270100	20687760	43974400	6037400	-0.023	-0.1474	1	0.857455	0.788661
Fcgr2	22655820	19784090	35558260	25849760	12274880	14677100	15532550	26522820	23519440	20990250	12416400	26054030	40524260	40878150	12732120	11980110	18646140	25446790	18244550	17680330	16303910	27208720	22717350	15642200	22064680	20010050	23988360	22453420	16234550	18618990	39967680	31092510	19509920	11525980	14932640	33605370	21019630	28782590	0.025	0.3151	0.983485	0.72876	0.871097
Hck	1227484	1704060	1652638	2840136	2150661	1086568	501432	2114270	1002345	1067693	1138799	1825872	1554729	2175943	1970494	1606464	2202196	2665343	3850114	2677042	1217576	4612401	2444418	1324617	865381	2293554	1424175	1023600	807599	1479984	2455412	1664221	1369696	700533	934433	3037987	3147708	1344859	-0.047	-0.3098	1	0.877323	0.729074
Hsp90b1	3121359000	4005611000	6855401000	6755723000	4830949000	3619695000	4341998000	7041432000	6203079000	7037274000	2201260000	3146706000	8226796000	8110491000	4439276000	5926829000	9369181000	5380180000	8153867000	2963726000	3900495000	7826817000	5904084000	2706258000	4748543000	7053844000	7791407000	6764972000	1644861000	3520151000	9254550000	6800316000	6095474000	1666662000	4095281000	11604790000	9560701000	7925121000	-0.095	-0.5914	0.92807	0.894447	0.569205
Col4a2	13493290	2326324	1752204	3849332	1945183	4785674	1563682	4006807	1539279	2215447	4602264	2025098	3956877	2782793	3502390	3128977	1709072	2408146	2629500	16829250	2210604	8064556	2245836	6248756	3364498	2321420	2184647	2013505	14021820	1439050	3005091	2717316	1667575	2980957	3370521	8271830	2988373	2252958	0.17	0.7749	0.775747	0.457414	0.879716
Apoe	6279706000	2970019000	971718000	1713243000	730109600	3539715000	5781152000	1949031000	3568208000	4570158000	233552400	359294400	1270613000	1347687000	538940300	641366100	1146933000	878212700	1045395000	2397385000	1547251000	1925024000	1099924000	5891741000	4187887000	3855499000	4901603000	3118632000	195858100	503513500	1281516000	796801300	927511900	204550500	562787300	1494322000	927968200	953503800	-0.131	-0.4847	0.982737	0.890794	0.637025
Sod1	750602600	973223500	1390626000	999104500	1143809000	908495000	884112300	1147351000	872507600	741731800	1082958000	1505802000	1309057000	2102605000	1686747000	1904443000	1033855000	2082712000	1238553000	624284400	832862400	915253000	933968300	692212600	775784200	947596700	963471900	719692900	1127992000	1754803000	1503766000	1820857000	1293348000	2373411000	1971752000	1536900000	1681344000	1974039000	-0.044	-0.3146	1	0.877791	0.726956
Mdh2	7274514000	5550222000	3226756000	3040643000	488053000	4598385000	3062421000	2632609000	2046255000	1659810000	1349218000	1992150000	451041800	558450200	492496100	827177500	233109200	587788800	227588900	6217534000	3901335000	1796195000	1305208000	7198573000	3581294000	2709612000	3070043000	1903670000	3891153000	1250405000	572912300	488660000	582987600	702530800	636447300	310228100	487763800	249109900	-0.053	-0.159	1	0.859167	0.785114
C4bpa	3452101	6211216	5283020	6893298	24005780	3436864	3820867	11987790	3756990	5032896	3763137	11140110	8916998	17389490	9509987	9349112	10152630	10413640	7898496	4376737	5677312	11390350	6736746	1599707	5231222	10433060	5167916	3621372	2204221	14527520	4803346	8391564	5797564	4972095	4528276	22995220	32875140	5979570	-0.133	-0.6167	0.910757	0.894738	0.552393
Gnai2	63941710	82628890	134260900	106255600	81358470	60854030	60893730	109562400	65871700	80235840	63269190	89259220	130441700	174588600	90695610	103437000	135914700	124119700	157602900	61125770	65171660	132142700	101598500	51455010	67214750	94072890	95249300	61331760	72298290	80389010	128401200	114101900	91006640	49231610	68567940	250184300	187394000	112930600	-0.071	-0.6973	0.846525	0.894258	0.497978
Lyz2	2562392	2197848	3035486	2847658	2146929	1669717	1667143	2872462	322857	828108	645203	2091735	1200648	1211960	3059003	1219180	1107752	1407831	2032728	4061602	2268397	1667823	1013047	1601023	1278176	963385	1043008	382142	16442760	2139136	1440852	2162588	338151	585872	1812243	2504947	5189170	860172	-0.016	-0.064	1	0.843534	0.811443
Itgb1	118164500	149188600	195501500	130373300	156541900	88583220	114553100	159409000	98001100	116950400	90857680	149281300	201322000	309778800	114251300	151970700	141593700	136212000	150358800	105420300	117311500	149114200	118010400	89803510	103117000	109960300	122834700	89214050	116207500	150064600	194344100	159501800	150909900	73851700	97443810	243621700	186556000	194805600	-0.098	-1.3145	0.302522	0.856399	0.150438
P4hb	2703176000	4718504000	7275425000	5604958000	5593597000	3659914000	4729375000	6903592000	5815786000	6729620000	2519801000	4032210000	8209833000	9718098000	5356321000	6938166000	9222942000	7093750000	8153544000	2415755000	4777547000	6783850000	5508853000	2744518000	4514183000	6720907000	7633518000	6240939000	2130505000	5492535000	9164959000	8655993000	6977632000	2832310000	5969789000	11122480000	9162645000	8557959000	-0.064	-0.3884	1	0.884292	0.691483
Alpl	13384090	1268624	10100380	10086870	760839	15409970	3403294	8824104	4071349	370197	1392010	8024976	11733280	915107	2176908	998780	6596673	964799	2782689	21516390	6107291	7173412	6442238	3294727	298236	5785641	3252402	1003590	49802850	1090619	536863	778171	1799911	14043360	1077911	12535250	8108496	5911167	0.108	0.2529	0.993291	0.754687	0.865208
Ncl	2206371	5024664	11614110	6969646	8336647	2086422	5107513	9186640	6246416	6094477	2630153	3821437	7427317	15258280	2500248	6357593	5726223	5782098	7692447	4034057	2942327	9875244	7006497	1562201	3597898	5823600	7088564	4876037	2617618	2071151	10357400	6140048	5224414	753383	3449760	12473140	9938910	6412795	-0.2	-1.2918	0.317206	0.85778	0.159572
Pgk1	319239800	300948900	197462000	199983400	55222730	180230700	248101000	187613400	128796300	284287200	49609710	75194390	69543040	109234700	25171240	48057720	32361620	57156960	28792760	266706100	193651000	169349400	92510450	216460000	165464300	193340800	201082500	236090400	59560210	67542100	94421310	48403300	69616000	29171430	33824770	42502890	59847460	60721950	-0.073	-0.3044	1	0.876788	0.73143
Fth1	188776300	143912100	295649100	235013000	224946100	248240000	188282000	285868500	148567100	193841600	239629600	244572500	309985000	445500800	268388200	367171500	232152400	255142700	260234100	119605800	128561200	216188800	217409400	157686300	153005700	158585300	231683900	194843600	187567300	191560400	273968300	491353300	261207400	269502000	192123200	379989800	372220100	493861800	-0.092	-0.7676	0.782022	0.892255	0.450414
Csf1r	5424530	10907400	12372830	15664320	6257173	7507427	9186731	12051180	8675422	6153445	4876219	9400196	8097695	18781480	9974691	11177440	18604790	23914810	22819990	6456144	3734310	15148890	12893590	13145190	7123596	15486080	9684524	7173963	3869298	11789830	9567327	16244820	12182920	5023693	6927122	28084570	14570820	9945340	-0.096	-0.6415	0.892364	0.894813	0.535752
Sod2	1193484000	882634200	648649100	586314100	246822900	967844300	561783400	529618100	523229000	285421200	459908100	631211200	312157200	356912500	455632900	436841200	235662100	453190200	198789400	933730400	649371600	599324800	380459900	1247903000	651529900	498979800	727697500	362714200	1063322000	452299400	390522600	335913900	252950300	565834400	442433800	257595500	427007000	182444300	0.002	0.0103	1	0.828399	0.828172
Cdh1	2201932	1325170	1442652	1041504	1454841	1672822	1135893	2348427	2092773	648773	201505	6750830	202242	1128318	6115121	7107276	963837	955978	445338	793906	4766596	1210409	1764601	1122530	608632	1168467	447133	1212671	352999	499030	845227	30020.7	243952	584073	327156	85889.1	344222	1129344	-0.839	-2.4494	0.003106	0.829966	0.000918
Surf1	6680560	5594942	5844277	3048429	2767856	5611516	5380487	5940986	2941358	3500025	3964152	5561031	5762761	3688102	7179495	6576157	2488089	6025552	3565361	4896380	6894759	7970104	2580405	5564830	5384618	4776996	3468137	4691517	8107526	6764653	5442302	5876410	3570948	6644110	4957774	7284385	7129809	4498815	0.159	1.1832	0.420383	0.20232	0.859774
Chmp6	520997	733222	1178574	500862	276105	584741	521102	769912	399616	309369	237738	447545	635332	423792	268536	261293	466693	311441	326468	609495	854622	854118	578179	664547	334610	612068	722996	435760	339324	417866	838390	465435	600492	111010	373931	582350	672402	369524	0.116	1.0832	0.504748	0.257325	0.865157
Calm2	51951330	34800570	52525400	46910330	20418210	49243830	26034040	47614180	51853880	80737610	19576780	29603660	32060550	37198310	13745400	19510420	20426970	26363340	25981300	40143500	34634640	36995600	27458830	40244920	57452360	59168350	55532340	44165380	37074970	13665720	34040970	23387450	31258620	12950630	21733470	25163420	39771610	38027910	-0.011	-0.0977	1	0.849517	0.802789
Calm3	51951330	34800570	52525400	46910330	20418210	49243830	26034040	47614180	51853880	80737610	19576780	29603660	32060550	37198310	13745400	19510420	20426970	26363340	25981300	40143500	34634640	36995600	27458830	40244920	57452360	59168350	55532340	44165380	37074970	13665720	34040970	23387450	31258620	12950630	21733470	25163420	39771610	38027910	-0.016	-0.1232	1	0.853715	0.795752
Eef1a1	2908083000	4886643000	4415758000	4109352000	2950382000	2253436000	4146799000	4830397000	4303383000	5100256000	806081100	2350981000	2841443000	5159645000	945179800	2664439000	1889775000	2398381000	1963633000	2828128000	3749618000	4567649000	3922303000	2418345000	3573030000	4333977000	5651750000	5347471000	914851200	3099258000	4668845000	2992599000	4005813000	694729800	2037056000	1741020000	2418648000	3357642000	-0.009	-0.0546	1	0.841772	0.813733
Nid1	1634183	0	0	234771	8385.84	868735	623569	0	767271	410785	437354	138417	286714	705908	532834	166050	306170	103492	426823	0	163406	366014	103033	451144	81940.9	163513	142492	35805	549953	591334	9804.75	661017	413856	548949	245493	455206	307535	509146	0.085	0.1466	1	0.792197	0.851845
Alad	123059100	140676900	209606400	121879800	73023870	86649120	131513400	153890200	73852600	160088800	52494090	69017500	136804300	173262500	33465890	77743760	85067710	83753080	34815020	114016300	105104100	118640500	92206040	100509600	87261390	127648900	123076400	162478700	45425230	68453450	198602700	123687600	83247470	70072590	40349510	77641650	102321500	158623300	0.02	0.1755	0.999761	0.782847	0.855897
Ctsb	308163300	345587500	1053444000	474860600	1013873000	425737400	219155600	995624400	293881400	189490700	734098100	1017168000	1311716000	2634280000	2279250000	2135156000	2106228000	2874933000	1921873000	278219400	222082700	752219700	710311800	350227800	344980900	541966600	512379600	172514600	1045553000	1719609000	909722700	2407509000	784822700	2309808000	2367118000	3532036000	2398649000	1870979000	-0.039	-0.1349	1	0.855552	0.792375
Txn	271172500	287041600	379370400	278824300	195461600	223965200	220831400	336133800	187773400	207621400	190412900	229811100	293769800	343035700	300306600	324364300	298297400	288451300	267040800	210999600	200637000	259384100	203112400	220696200	214762200	251652200	249122400	189030600	233614000	240855600	296095400	307792700	194432900	291946000	278894100	444429000	344640200	257006200	-0.078	-1.1007	0.4599	0.871014	0.24831
Gstm1	1042832000	1441218000	1537636000	958818000	627168500	757918400	1102241000	1550128000	614105900	887892600	460161700	720436100	882535400	1266093000	376592300	727255000	495183400	693059800	535601500	865707600	913221400	976758300	740613700	940771300	899488700	836539200	949287800	1053121000	380242800	711640400	885132200	739190400	656957500	581656500	448074300	871557800	823106100	683476300	-0.082	-0.995	0.5561	0.878859	0.306445
Rras	16998200	21260400	26844090	28199010	22685890	17308040	21883200	18239160	19422700	26622690	16605270	23103790	26163830	37032900	16836900	18248800	22849400	24525050	21646620	20217430	19211900	21984320	22020340	15517460	19066780	20161510	24555950	20281620	15329430	23245820	31372470	23589350	24167730	13073220	16037240	27456120	31061630	19108730	-0.053	-0.8428	0.707945	0.888766	0.400557
Slc3a2	60731550	55686930	69253570	87941010	78063060	43197010	54156100	70762470	60438200	73825270	35081780	49112840	87217040	106585100	47260530	62308470	81897290	77627420	143001700	48794210	43950360	124280900	90475310	46263900	58618080	56931300	82920800	48747790	225935200	45374340	84338310	66589060	64770540	22988660	40412650	148654200	134316400	68198610	0.003	0.0277	1	0.824428	0.831664
Hist1h2bm	322325100	278334300	426531900	433105600	95900540	211472300	176649100	421572400	107589900	233637600	113207900	114962100	267891800	176863300	61206500	216820100	117092500	151473600	71875630	623787000	194039200	617523100	137535700	291806900	232861600	336084300	317283600	230298600	472473500	103897600	285079200	167981600	107179400	63804250	168302800	249139400	257915300	221517700	0.21	1.3373	0.30103	0.131346	0.852242
H1f0	695720	282659	47355.3	1390849	59733.6	328502	232296	1746026	709119	631072	304269	54252.9	234284	111304	88753.1	203257	102117	102360	272013	1666785	617962	4346066	356640	347337	195116	1293510	1934521	538524	71471.9	129880	215281	98572.4	76239.4	116104	62982	98815.5	142611	378476	0.256	0.7213	0.815293	0.494036	0.881143
Gzma	969680	551427	657780	624086	520337	681179	974192	1437925	186756	379285	307430	459496	420990	41262.8	534081	855404	142335	362440	1820211	1064832	551662	1013470	658113	907312	627193	500432	902647	664952	464133	302559	599593	276288	151385	378151	125832	1542787	408341	311879	0.011	0.0506	1	0.818933	0.836034
Col1a1	1574425	2457737	1605782	1152830	342355	4107169	1600101	1567290	1456938	974911	1089677	348994	1383797	1103586	869689	1203247	200836	767854	2338259	1793336	1304674	831539	297990	1613399	1083645	1385674	1898251	1365023	1383909	1120655	559992	555364	943392	1924891	996081	3059991	668567	530366	-0.06	-0.2668	1	0.87285	0.747072
Lpl	2754864	1193078	1143056	2088038	239252	735940	2379877	894942	3194803	3609717	1354780	533672	589467	157880	403611	304307	710419	581901	837715	3583709	804090	1124379	776492	4134819	1858145	3838987	2314487	837477	465584	1998023	2257968	1993085	512361	432060	174211	373705	798025	848978	0.196	0.7252	0.812571	0.491384	0.881056
Mpo	4412321	5591988	11386180	12673610	21878870	4483597	4391230	14196680	5234232	8449375	2596987	4063387	4645258	4472967	7923163	3159831	5078196	4748804	13866000	4958085	6500465	19786460	12919260	4085073	5690780	5996019	6799181	3314971	2530947	6439875	6745517	12780040	12048700	2080664	5419708	9503787	48401820	3517485	0.044	0.2278	0.996056	0.764317	0.862434
Fn1	559584500	415185600	230751700	287226400	411219500	456531300	542509600	418935000	365328900	439731400	152483500	269978800	319062500	487174000	262855400	332877600	344772600	277369700	318338800	350053300	316256900	362278000	228087700	500015200	446816600	521710000	479532000	321720500	155954200	368921200	319936000	278251200	281679800	169955100	207642400	534251800	390127500	326040300	-0.093	-1.0264	0.52633	0.876553	0.288508
Gpx1	2407150000	1862915000	2224453000	1245182000	383535900	1923237000	1558094000	1376366000	1065255000	960835100	1426680000	1072670000	1057558000	972507800	1709271000	1909447000	1077502000	1092014000	451988600	2497864000	1499367000	558160900	618879300	2163597000	1576274000	1479736000	1484223000	836436400	2303775000	1298373000	1467894000	1016443000	571620400	1210982000	1597917000	1241303000	955929400	751468500	-0.056	-0.4238	0.999919	0.886982	0.672443
Lamp1	70005840	53667930	106393800	80534070	102436100	97526440	57463590	105903900	75109640	55122660	107713300	98926840	144660500	179907700	178497300	162590700	190843700	176497100	242600900	44855570	47840980	123591200	105195300	66618600	63953080	88885050	99102410	49342980	103159900	137808400	160773700	149859400	107398500	158216300	135739300	306791300	204779300	176542000	-0.034	-0.1975	1	0.864496	0.772613
Hsp90ab1	1144985000	882262200	782104500	848276400	413572300	731568400	797102300	915757600	533985600	1066846000	305880500	376279900	717630300	644756600	238820100	360952700	543935100	430906700	437996800	936025600	565230900	867147900	585680900	701820000	571466000	787405200	773472500	794772500	203278400	294232000	965742600	560457600	377547000	298939300	260900200	771211800	694630700	661694800	-0.073	-0.6316	0.899867	0.894808	0.542411
Dmd	2715324	1981777	4675802	2977159	3086981	2057312	1467947	2945329	2486658	3648183	1281245	2396956	3029061	6134361	2106633	2225206	1902399	3072991	2091836	1356513	2294317	2666400	2037731	1608787	1287984	2573402	3767458	1866054	1577639	1576167	2024611	2544897	2672693	1389057	1815812	1827932	4370552	5114837	-0.204	-1.999	0.033579	0.833513	0.012116
Mup2	168313900	187170700	223217000	82854460	178587100	186254700	127945800	160810700	192705000	249136700	133563100	175272300	191597400	329378600	185798000	257879000	247611700	350698000	117353500	140259600	118814700	51220360	108732600	68040350	101062100	335241800	265078300	114117200	97971620	85921640	367651500	200986700	181125800	120202400	215691400	217688400	307201900	287347500	-0.219	-1.449	0.222182	0.849203	0.102713
Cd1d1	37167650	28136300	34210260	32198270	25383830	39477330	37678840	30909250	39902610	42911870	17182640	26588080	29022010	72429540	23073800	29194950	42256230	43959340	28993160	24140760	27146770	31628510	33674140	27561170	31563390	37745050	65966230	35880440	12108980	32205410	36454600	47082520	38491880	22071440	19414850	38984320	37845010	67845870	-0.029	-0.3358	1	0.879791	0.717331
Lcn2	8653741	10172130	31626770	23870840	52631790	25788980	27488940	37169330	6663711	32037180	2160345	11958730	8675698	5205222	55618740	3410809	8685868	10002700	31763150	21351230	20761690	25601090	17947210	6315086	13081000	5770885	3735195	2857367	6960889	17732840	9536933	21565770	22134950	1314448	27294170	13006120	135242500	8051090	-0.205	-0.67	0.869661	0.894652	0.516494
Krt8	942524700	411347800	655991700	405827300	156293600	545796800	202187700	528230100	240138400	296549000	409511900	371622300	489793400	317563800	556874200	608146200	314967200	361785100	277506100	1277844000	441511800	525601300	347844900	639782200	483577800	308897100	307474600	312240800	747822200	198784600	486916200	368265600	175543100	409790800	494271900	675247500	399831700	341061800	0.049	0.3553	0.974927	0.710447	0.874179
Itga5	37544830	55934680	59228350	44793360	70705390	20754640	49992570	54729280	27232000	41475960	27261230	59242390	79178410	126810800	30440770	52977100	40878100	41469080	38082850	32028000	47664440	37517720	38775780	28865600	29889670	27895930	29047390	28164730	30444480	71679240	82613010	54150860	58791010	29788470	29528710	81815050	59434260	64485500	-0.124	-1.0672	0.489097	0.873513	0.26604
Cyp2d9	33169580	41368580	50990690	76087000	79036570	24851430	44045820	81749860	22451010	43034450	18676650	30408070	110096300	39388750	23255930	41298690	75070810	46737590	125128400	16534510	29790690	165786500	239689100	16650230	34517190	66850950	53539570	26811960	23625740	27045890	70893660	56142580	36458440	28590490	41782380	313896200	216957300	26127310	0.098	0.4405	0.951425	0.667678	0.878958
Otc	11879200000	8263642000	7656921000	5338039000	2080313000	9534033000	5282614000	5446163000	4448947000	3047421000	7704399000	6816657000	4381343000	4242526000	6851955000	5316736000	3744574000	5133910000	2000321000	11417860000	7089420000	5180227000	3145317000	11960450000	6887087000	4823063000	7348126000	3447378000	7657392000	4988067000	6306473000	4504558000	2442205000	7781438000	6421976000	4599960000	4715293000	2204850000	-0.004	-0.0341	0.99999	0.837781	0.818546
Itgb2	13920090	17714390	22459560	34619970	22602350	14892280	11572860	24787340	12223080	14533390	6840191	14907510	18115500	19148970	11271310	11284940	18686820	19674480	38413220	12804420	11249410	37311050	27995560	10154530	13675840	26444490	17850130	13434620	6004274	15019230	14224240	16639070	11183020	4548812	7997225	37877150	36232810	10497660	-0.141	-1.1259	0.438797	0.869148	0.235401
Agt	6500194	9739900	14533130	9379195	9501335	10865850	9118127	13841230	12387470	12966460	2623211	6268147	12880120	22709190	7464293	7634457	11096990	11121580	9877315	4483779	10627930	8864062	8121531	7845479	12057810	10159120	20169630	12764990	4418410	8440038	15673210	20071970	13233390	4714288	13966200	18373250	13758290	16077240	0.078	0.6642	0.852241	0.532423	0.882099
Itpr1	1837934	2303866	2767254	2031135	3025405	1514866	1782778	3261739	2942443	3243518	1124276	1136315	2636001	6184921	1652243	2487562	2671660	4119964	6961753	1896757	7203435	4570047	2305114	1863664	1664486	3429062	5869266	1974713	3423908	4394216	4337514	3639049	4147632	2614002	1273121	4226375	2556592	2491750	0.177	1.2074	0.400745	0.190011	0.858517
Oas1a	4991858	10397790	13930420	27841500	18994270	2398828	5473854	16293600	5300299	5362011	3380439	6796606	18459140	8634541	6416838	6979762	16222880	9813483	46968100	3637567	5666171	53976880	22693010	4665981	4268186	9891836	8727653	3591398	4563534	6591938	13452120	5913718	4681858	3302122	3966455	65618620	67203240	8845473	-0.075	-0.3055	1	0.876898	0.730952
Nudt19	581651400	944845700	1259742000	771726800	585689900	762517500	749002200	726656400	773882000	695748100	781972200	767693900	1008413000	1314802000	841643100	1370045000	998602200	928828600	1130720000	619766000	732266000	1008729000	1001541000	620737100	846700100	822842200	694867100	675145200	1296069000	1274114000	1131272000	1032813000	715858100	1302617000	1304208000	1363173000	1306160000	885489900	0.058	0.5623	0.905259	0.597695	0.882157
Tcp1	169184300	125217700	213583100	198191400	94299160	169010600	149357400	217840000	192067100	240395900	69309940	80247910	174523800	142474500	66280000	115425000	106280400	116981200	82869650	171622500	105814400	146862600	125227300	184885900	141946400	174646500	179765500	194601600	71345390	72216170	268416500	128148000	96809830	77553810	135487100	150536800	140231300	173527600	-0.018	-0.1781	1	0.861877	0.779055
App	6925251	5732332	6129460	2514903	692698	6215084	5093317	2110091	3818045	3007589	1941579	705661	2259687	2753210	2174154	579841	1247547	2188947	2023251	1282814	6400640	2573038	2531064	4225038	3839113	3684808	4438414	2117941	3963399	1524028	4340334	1709433	2278359	2504031	2912330	3915591	1925699	1690883	0.126	0.7086	0.823984	0.502649	0.881408
Apcs	328912	143769	211776	1579764	1699029	1414759	1204652	1505335	1001968	1571489	501849	614476	102042	1325093	654214	274978	1090153	248416	666381	402870	446430	1509748	470301	87434	269079	933787	168280	1019415	284350	445228	302388	62156.3	278820	401851	132747	462959	1767569	488868	-0.549	-1.9928	0.034439	0.8336	0.01248
Gusb	38001530	45038360	139932000	67605240	141135200	43786070	41487890	123769100	54039800	52168140	135817700	132713300	193782900	277876300	365951200	325033800	260939700	272501300	290160900	32192540	45031540	109204500	107990000	35504620	47319410	69932240	85401620	52561860	139168300	232999200	195673300	255146600	120032000	314367400	263033800	394025900	270491500	224951500	-0.017	-0.0625	1	0.843256	0.811812
Prkar2a	6551704	11850110	19195520	9963724	12190560	5378255	7665367	18094870	12523080	13662660	2721727	7280699	19509340	24452500	5276197	11250560	19769540	14884290	14679120	5814004	13301170	12733610	14181510	8229236	7022540	15170350	18078190	14421480	4065712	11881090	23351570	17820750	16403000	4838906	10003460	20694980	15518180	17906230	0.084	0.6169	0.878782	0.56335	0.882404
Pfkl	6306266	9020096	10444140	10138370	6718361	4442236	7911723	8002829	6066231	9325389	3275200	3994157	7187571	12448350	2531998	3422224	5648890	6651738	6234487	5918486	5664728	11125010	5767793	6599499	3868317	8470953	10343750	9139185	2321167	5790071	10187650	8479132	5142547	2649520	2348286	9846802	7708004	10007910	-0.019	-0.2056	1	0.865552	0.769836
Fabp1	9025931000	6382625000	3198882000	3637120000	1059862000	5202788000	7031667000	4191715000	3828426000	6818214000	593274000	1427432000	1106861000	1553993000	475633900	1080490000	566998600	650354900	588164500	6874561000	4450345000	3260632000	1791850000	6059694000	4830196000	5157832000	4278639000	6199647000	844043600	1148495000	1028305000	884660000	1179133000	529547100	605888200	557273000	769461000	983909600	-0.101	-0.3386	1	0.880047	0.716027
Cox5a	1545771000	1153479000	1091055000	840943000	334351500	1173401000	771625100	891174200	832725200	691776500	249642700	756262600	300658200	458050600	252986900	402615800	147099500	384477000	161197200	1125031000	962355400	884599800	672464200	1620621000	959534100	773392700	1302165000	733064000	1028430000	473613000	273473000	376497200	421585400	332493300	280749200	153490000	356404200	209684200	0.018	0.0908	1	0.808498	0.843124
Cyp2b9	66760870	124737200	187373400	87463110	80962110	84968020	104936000	130262500	122442300	137485200	75674270	96633870	195252700	331945400	129934000	156257900	187260300	203904300	105241800	65949420	141268800	118539500	122139400	73046800	107107900	121563100	240518900	139239800	37079210	127025900	215054300	305487200	200691200	64903310	152181700	190653100	172340800	202919300	0.026	0.2087	0.997717	0.771324	0.860166
Cyp2b10	52264110	124103600	162140400	86035200	85069020	72943010	107564000	150128200	92854610	95809500	65549780	86800520	148242900	326768600	115360900	126499000	165414500	156753800	120471700	66402160	134566100	130738000	88796570	59671680	127417600	92401840	186087900	128361800	38626080	103894600	179045800	202506700	150691300	83862030	146836100	201583000	205950400	173930800	0.067	0.5863	0.894132	0.582798	0.882348
Pdcd6	58838150	32143630	57795270	67909520	26446490	57255630	35952800	45668870	62163670	68429850	38045320	30843040	48319460	38257450	52145860	55886920	48972030	49527690	39448950	46011720	28529530	54215890	49297440	51179490	53591620	52580100	74926380	55509660	35196210	20431770	67726040	57556410	35739680	46556330	49918090	56779290	56770380	62218440	0.025	0.2589	0.99253	0.752314	0.865837
Rpl7a	78764730	528899800	586856300	478107300	532214400	187676900	487707000	710497400	554952800	644944900	58314960	335351500	469471200	1042248000	131584100	347236700	504083200	437189600	471630700	127053300	497625100	652916300	640687600	196765600	424383000	629463000	812758800	781519000	70349180	463197000	657009500	607130800	670335200	70855840	240747700	600937900	598675100	645344400	0.048	0.2216	0.996636	0.766622	0.861713
Gsn	22544430	27419790	8255543	8933049	16177770	15441540	31251250	8117511	12774900	16785490	3642423	17323570	5885515	35927470	5253468	6684838	4661260	6822572	5168688	10159010	19279710	10801910	6197109	16718100	15515610	18728640	15702510	11051970	9683918	27208480	6627345	7633334	17967180	3977833	2634566	6130072	7029544	5326885	-0.125	-0.6552	0.881648	0.894768	0.526508
Scd1	15589660	58467670	53108780	26696430	24061320	18247220	35127680	66158580	16947920	48784200	25376810	47105840	68954100	55442900	27518470	65451900	60185970	23576140	29834030	23632100	57651980	31745260	21898510	32202760	70253700	38983850	41255910	55023910	14373650	137903700	49999320	38331450	26542490	37131640	53976170	116079700	43891340	35346160	0.143	0.8595	0.705373	0.399625	0.876571
Myh8	4134737	1308352	447952	406219	248473	120927	1615476	432465	140904	246769	74072	64582.8	434993	558734	115793	1165638	551258	128665	253521	1847461	344959	169324	431222	225200	360552	587168	886919	259412	148598	262675	212866	255333	232118	46912.6	2627229	375598	496014	315530	-0.041	-0.1328	1	0.855226	0.792988
Icam1	21791420	27235200	62202040	64765920	74303430	20889740	25723990	61295270	32150860	30929010	19284030	42187160	80592270	75300720	37570400	44529690	59236610	44152970	92945490	19107370	26458720	71014330	52487690	21669830	30794420	35268320	28985870	18196360	26395230	30093370	59778370	38072230	33847810	20239130	23846370	115783900	103180200	50626030	-0.185	-1.2432	0.35002	0.860894	0.18014
Ca1	607844	996254	214424	540996	394022	646631	496666	699856	1064638	725375	272160	481996	331152	1099322	365426	455284	377882	503029	825506	844035	5124562	1310141	508216	992191	319930	529537	345849	863156	1488689	1715353	231286	500274	585017	633238	384945	441058	336667	345087	0.209	1.0001	0.578533	0.307551	0.869674
Gpd1	1177500000	2202730000	1737285000	1749021000	1174332000	1421860000	1357656000	1416926000	1393512000	1388643000	1121566000	1062125000	1298265000	1963297000	1445976000	1685454000	1337613000	1521500000	1431842000	1114948000	1022936000	1345310000	1635325000	1190040000	1071248000	1540332000	1391940000	1184716000	1125034000	1281837000	1578103000	1692118000	1270510000	1600266000	1549832000	1783406000	1610786000	1650618000	-0.077	-1.1348	0.431523	0.868494	0.23093
Atp1b1	271829500	458413900	580881700	279604200	427215200	201769000	332182400	355515500	256045700	318128500	261360600	433554800	452981300	961635100	269882200	383661400	281089100	437331700	251409700	393900500	378957400	251577600	239370800	199713500	222848700	263992600	260500000	246418400	1953852000	510924700	484854800	424975200	502252400	285886700	305977300	442404600	434656700	478727100	0.005	0.0354	1	0.822615	0.833161
C1qb	7406088	7535448	2990309	10520850	5006568	4724413	4690363	6018075	2850292	6983556	1226400	2090245	2665981	3408492	771731	1645815	2142749	2550729	7073831	3599692	2783071	10851280	9576838	5147925	6640354	8820065	3638838	4917867	835505	3291379	2762400	1995035	2911204	393550	1131457	6114255	6302998	1847753	-0.068	-0.3236	1	0.878654	0.722924
Rpl27a	127223600	652184000	889188200	609784400	683983800	260806200	604345500	989336800	649395900	814415000	102556600	455086000	559910200	1091733000	140127500	509504000	486986800	500011900	519512700	200860100	638951100	677396500	706131400	248834300	587203100	905905200	984893200	803785000	133860000	558409800	714534100	703239300	846391500	120548100	383386000	457079000	559880700	793114400	0.032	0.177	0.99969	0.782344	0.856099
Rps16	71346640	115596200	91765990	82212070	57858510	48760470	82176240	118539200	65855430	119051800	12216640	38528200	46909450	78806080	9999462	35808260	27492800	33273610	30701170	80567760	72719510	86968040	90101980	60948920	58263440	108354100	84654210	122710700	20467500	50441040	90123250	43496560	62080940	10218450	20167570	30658900	40660240	56741530	0.041	0.2208	0.996709	0.766917	0.861619
Rpl7	174049600	1007921000	1459771000	1028529000	1404340000	403953900	941271300	1544275000	1284805000	1299979000	305789900	886137600	1805801000	2701710000	742921700	1235964000	2155436000	1459835000	1732017000	271329800	986442900	1433727000	1451416000	331919200	860204600	1334383000	1619874000	1474782000	271084400	1263127000	2233317000	1980613000	1812193000	322124800	1110879000	2561683000	2094660000	1958474000	0.005	0.0251	1	0.825033	0.831152
Mdh1	1226253000	1420493000	1649919000	1249099000	643482200	995136900	1223174000	1157689000	981801000	1174874000	487795900	749234200	776651800	1128317000	368465400	737028200	469998300	775525300	483152200	1107955000	1010454000	1210043000	984756900	962653400	1041976000	1136216000	1228307000	1111096000	637899600	911380300	820593900	832270000	784070000	554723700	690109100	524454100	805072800	731881800	-0.02	-0.2274	1	0.868286	0.762093
Rpsa	127526500	184629500	184145700	103935400	70487810	69162920	124040900	172377600	104120300	164836100	30400420	79347240	118039700	129810200	32551990	55811800	92351120	67707830	38516100	108288200	117555000	123354500	113179800	88093020	79237460	165362900	126250300	194228100	30426770	85587670	220891600	84396390	90394090	21720970	34713560	75432120	99614050	92533510	-0.007	-0.0488	1	0.840664	0.815119
Calr	1138684000	2091108000	2701953000	2581289000	2232989000	1451416000	2057520000	2981657000	2489464000	2676272000	817961900	1543173000	2650405000	3445282000	1557711000	2205668000	2695434000	2072252000	2458843000	1016253000	1939046000	3290215000	2509921000	1049229000	1812862000	2773788000	2948244000	2651860000	801340700	1877119000	3611255000	2748673000	2544941000	591866100	1490419000	3193898000	3214903000	2557569000	-0.077	-0.5742	0.938944	0.894124	0.580511
Fgr	1035676	471099	4229866	2011644	3326109	1385405	2115120	4545726	2675041	2389838	1822291	1163053	2977362	3816330	1110055	2329956	2824134	6087602	5835115	903778	932783	4315672	2765781	1058438	1058237	3820095	2934100	1839274	1281847	2174223	2404506	3852135	2587037	526713	1840895	7248117	4720592	2697172	-0.093	-0.5014	0.976242	0.891624	0.626835
Slc2a2	356772200	559216000	633250700	333306200	400070600	329773800	405313400	385640500	384943300	442226900	349171200	526249100	552358300	1073898000	396450000	458818700	384076200	433588100	236749200	352185900	475172500	328824300	298118600	293180700	327256900	322666400	401873000	343374100	342072900	721115100	613719000	499887800	585679700	342766200	348368500	450791300	485606000	548889300	-0.068	-0.7571	0.792025	0.892639	0.457482
H2-Q7	55439800	90716330	125451700	207333000	145429300	48691190	65083490	152808600	62282140	96371840	41429080	59575650	168252900	118622000	50455830	64266600	152994300	89427450	242500800	47263950	55673790	239196400	190655600	62875920	82662550	86822060	91327550	81109270	29695240	61563570	149189200	94823160	69197780	34775210	48376470	298630300	235709200	83367390	-0.09	-0.5444	0.955957	0.893323	0.599806
Srp54	127092	308160	109118	191338	42557.2	248804	149557	418638	86399.8	735425	92485.9	59552.8	29837.7	216921	23246	126350	43382.9	104854	77840.8	80087.8	215463	421008	66917.2	29151.7	272771	339244	467391	371836	199313	52364.4	181001	77285.5	103338	38303.4	103990	439901	303399	72483.6	0.253	1.0816	0.506139	0.258255	0.865244
Hspb1	87950280	150374600	80369940	238431800	13999300	11279840	15866070	241567500	137862800	5693167	122067000	137631400	194748200	26777240	127445300	166272500	189190500	126346600	218042000	72874810	44890450	232790000	177104300	68307570	70095830	27994610	278732500	381047700	56363630	75029860	12667970	18155510	393093400	66827980	79188930	211880900	116884900	94584000	0.112	0.3213	0.982277	0.726015	0.871608
Psmd3	25996650	35113730	36250200	28667880	26027390	17562020	30855400	32958410	27201670	40343490	9291478	22408720	38712610	53525460	13799370	25627360	34028720	29930780	19845100	22574300	26129630	49378430	31320600	21797230	20741910	32244540	44253140	43956200	7785096	18345730	47908940	38814330	38528410	9748127	12750490	30707410	42017180	39099580	-0.003	-0.0315	0.999987	0.83726	0.81914
Lmnb1	2638109	2129137	2114314	1968384	803546	1803315	904926	2125519	1262521	1057124	708236	1303305	1546088	1508752	1270012	1839317	847237	1186473	914470	1913817	942720	5386221	1032849	978146	1589776	1378628	1141937	1069363	1396187	899675	2603362	1263581	1066263	902343	1173479	4558831	1777850	841683	0.038	0.3358	0.979291	0.719482	0.872753
Anxa6	870765800	796440900	1948834000	1243821000	783271500	524577300	707253400	1536741000	981898000	1148203000	701011400	789234900	1665199000	1602633000	730934100	991979900	1316292000	1461968000	1020874000	753491000	841414000	1230334000	1123819000	621567800	677207600	1037218000	1105841000	1022123000	664421900	833850500	2102633000	1279495000	1016905000	1083586000	783794500	1625129000	1467278000	1644099000	-0.017	-0.1619	1	0.859587	0.784211
Crp	3000854	6543228	8726187	8382273	6706393	6095200	7639480	7312705	10527580	13855910	2520020	4907241	9100184	15676640	10175820	12489040	12883790	12895650	10323130	4383148	4863530	5562216	7344263	3730601	6206281	7328652	10113100	8507042	2930913	6629798	9266263	11220830	7609109	3966969	10272210	18969700	10339660	12097480	-0.123	-0.8815	0.668913	0.886536	0.375622
Rplp0	160515400	654472300	910270200	664759100	668957400	253246000	599214300	851781800	685853300	777411100	137747200	481891300	902959900	1286493000	255024500	628882700	928875500	730817000	758447900	224918400	587556500	820390300	783145900	228126300	532872800	790699000	921431900	876188200	137895800	721932600	1245803000	888103200	925617600	109298000	497028800	1088095000	973332500	956072200	0.02	0.101	1	0.805682	0.844812
Hmox1	11792860	15162470	21179060	34296910	17377050	15201260	11672230	33347380	12717620	31115940	5709994	8074195	14571560	12300840	5019839	8975708	8501141	11128540	9684385	6236083	12662540	48637010	37534440	14830280	30074140	34482720	30296630	18909560	5645871	7770015	10938820	10417610	8366945	5602060	8154117	15380100	20905270	7320714	0.048	0.2966	0.986844	0.736778	0.86949
Glul	336704100	812883800	1464349000	991603100	1485188000	286141700	621608700	1995592000	908501000	1310823000	126053100	688680000	1165876000	2964533000	112005200	354015800	1413414000	1206038000	1368443000	288822100	689015800	1081136000	1521610000	268427100	420391900	1660561000	1408621000	1626779000	169304800	652711300	1317125000	1542868000	1543824000	182708500	366714600	1592991000	1793933000	1862040000	0.015	0.0603	1	0.816509	0.837811
Cdh2	22955520	11192360	14268350	10529690	5862111	14523780	11354960	9910317	10981200	13519450	9426934	13352110	11686090	13378170	10996330	11147970	6419255	9983391	5065600	17080030	10303160	9372360	8747684	15215530	11956090	10629950	7301545	8510125	14585550	8523095	11746460	9734864	8295668	5532912	5812141	9692449	8098344	12870020	-0.111	-0.9707	0.579698	0.880606	0.320701
Insr	16091390	16854970	27063380	11568680	21222920	11389380	17466550	17160120	13028810	16689380	7974428	15677200	22216050	49654990	11779970	19040290	16508500	24045690	15122620	12818130	14743240	12618090	12249770	11606560	13793610	14151800	11557090	11721750	16183350	18577600	32523410	21984660	23252000	11341050	14253820	21017930	26457060	28291310	-0.05	-0.4495	0.993936	0.888738	0.657851
Cd44	8631944	9756093	13664200	40537700	18934840	7458927	4728658	16118800	13939430	17567980	6366660	11510140	17741800	15266290	8763662	10369030	17446360	33548450	39767370	6438285	6416951	41741660	20854740	4495497	7653467	16640180	21572210	10217110	8726905	10422170	17954220	22031170	13555840	4218655	7533040	35207810	46793560	16792590	-0.054	-0.2918	1	0.875512	0.736819
Cyp2a4	181454200	260413600	413405200	339494900	413201000	184161400	292827500	514750200	374424500	385946300	158576300	298527400	679512100	679567300	259968500	408448600	701251500	320954900	579140600	143330200	302628800	467823600	330925800	136186000	280391200	464933500	476959100	512233400	81425760	312240800	569844500	436577500	436157800	112236100	197860000	907510000	604948300	607464200	-0.114	-0.6973	0.846525	0.894258	0.497978
Sptb	29325570	100138400	136717200	64077070	65955940	31786940	174161600	123223500	62787410	51409160	28610550	144954000	80457440	135833300	44061100	64605910	94221430	89484120	66369140	34957280	121326800	90882720	28713590	38590940	37304000	113041700	71769250	39235480	41231820	210412500	151176900	101228600	56071180	19088900	40356340	74011620	92461920	50787030	-0.196	-1.1707	0.403113	0.865894	0.21336
B4galt1	4910539	20157610	21331850	28716550	37507870	13615530	22465950	26741630	20340740	24622180	10822150	15515760	37924540	48730820	12495540	25821140	51102900	27601660	32171200	8020862	20547340	39295400	29640870	6146145	10105640	28797850	35432030	12417860	8733328	24344040	46813190	28386890	35612220	6969837	18382390	49830200	58234340	35750000	-0.051	-0.281	1	0.874383	0.741319
Gstm2	24005460	29019080	35860080	25633550	13684760	16834310	24165720	35688270	17681630	37256640	13305350	15811590	34920490	33389000	7209567	12645340	16533010	20961790	9805298	24224960	18456850	26773010	31993350	18801660	22195230	27536970	34365850	32508270	8210473	13318740	32786390	15088320	21312730	15059520	15223020	25691620	24283380	19256440	0.039	0.3858	0.967328	0.695749	0.876155
Ca3	2801463000	2008707000	1320658000	1818224000	682156800	1672730000	2170602000	1555608000	1193327000	2485804000	543975700	673445400	934483200	1662126000	364663700	632901700	557019700	856109800	428063200	1832180000	1873528000	1983150000	1253765000	1783445000	1601078000	1351860000	1932534000	2480514000	426270600	794709600	1227662000	994826700	872335100	510935900	429902900	569980900	754118300	966644300	0.011	0.0701	1	0.814001	0.839563
Lgals1	3871457	3213840	1834978	4615730	1008036	1666238	2707423	2407998	487330	3393242	649390	841438	1900410	1554806	332024	1228249	408983	691452	826305	2827190	2562412	2367258	3564445	3293215	2248051	2118534	1258487	3445793	1008085	950649	997245	544332	483848	474353	512948	1240390	1113054	546606	-0.031	-0.1532	1	0.858317	0.7869
Met	2445376	1435526	1615668	1114581	737035	1596589	2054754	753651	1776759	2896344	874604	1424826	834325	1252286	1174020	1488303	394446	1412622	1216827	2152154	1704481	1595322	1421485	2099175	1439412	1459173	1881310	2130236	874528	1156370	1316116	723595	1725514	1403955	1207191	690978	1548793	1735752	0.09	0.5918	0.891472	0.579339	0.882374
Lgals3	274665	402728	553595	2335509	1067870	188944	102447	663836	39791.9	198272	98279	292537	692606	871794	0	187463	176924	90591.4	1126043	1597490	360397	3160400	1931823	108058	227470	201086	390250	243116	800390	533953	371423	76576.4	74079.8	298693	121736	133604	914216	99945.7	0.19	0.5318	0.918344	0.616133	0.881716
Ldhb	40713310	43569550	71285330	49701630	41154200	34748460	40984970	53950810	36489960	44823810	24508570	36689420	55072870	64627050	33333360	36682050	30473740	39412630	38440610	32802530	27162480	45114480	38863760	31264490	25997800	39698360	38092470	43003320	59598020	33014980	45587410	42501260	40101960	35268050	33918530	32813760	47396410	53633770	-0.094	-1.2592	0.338996	0.859846	0.173217
F9	2212141	5169108	2927327	1877327	2618719	2217391	4202572	2491917	3035580	4970905	631780	2436503	2448305	6441049	1518571	2101950	1434001	2467904	1239519	1878616	3734457	2396548	2171482	2131666	2876587	2981680	3796087	3460709	1368598	3709826	4350458	4368446	2452378	586785	2102575	1925775	2383062	3695269	0.021	0.162	1	0.787295	0.854042
Lcat	66714050	50671070	36736340	44919930	12362700	46322450	61855320	29460570	40133680	28693570	6588711	7548523	17530930	21968010	13698870	14316680	13613310	11793100	13191220	44448260	34846880	29977160	18684280	102403100	70038900	42616300	71721120	30751740	20285560	18681100	44394130	12962080	13618570	9660109	4300474	14373650	16980030	15805780	0.054	0.2464	0.994071	0.757227	0.864512
Cnp	7015727	4420968	7914538	2420611	2036170	3145072	7392066	2154767	5460288	5227513	2638240	2393580	1546407	4483848	1650377	1880862	2025109	2758614	3015764	3516774	1456673	3347199	3553098	5375114	4055021	4120688	6215289	4586178	1413357	1819123	3370932	2754586	2732179	2374242	1583859	3394461	3048901	2049671	-0.085	-0.6465	0.888497	0.894804	0.532382
Pah	1172531000	738144100	488492600	564764400	208098400	787958700	686799800	588711100	445059900	937428500	216144200	250034400	421073800	461978100	132029300	216950200	235026900	272136500	119337900	827266500	534689600	534771800	302213800	734912700	592148200	527476700	621701600	659852000	116191700	175552800	587029000	401790900	260135900	221144900	150631400	283544700	349236300	378969900	-0.033	-0.2054	1	0.865526	0.769905
Mmut	531730800	338177900	372873800	210738500	105920600	405674900	230438200	252965300	174270300	129969700	352718400	348028300	241104300	234494400	458602100	317400700	223434700	275252100	118587100	487181400	319402500	263218700	157259200	576162200	306453300	203985800	315787100	148321000	504078800	291739600	322647300	203599100	109990000	442365800	418268500	309403500	232499800	122124700	0.024	0.1494	1	0.79132	0.852251
Enpep	114642100	159389700	235771300	117308400	227357600	127984300	122307400	193791800	249788500	169430100	160093400	233624200	297886900	550021100	331577500	391776700	737486300	322306700	352711400	128942000	113015200	141970400	430205100	100304200	266359100	114122000	154989700	129065800	409120000	327523600	299274300	345234000	253267100	306421000	348497100	878475000	360421200	683731500	0.045	0.2277	0.996066	0.764354	0.862423
Ass1	19898110000	22492680000	13630680000	15270930000	6163946000	14672530000	15115200000	11377440000	15629560000	23010750000	4568462000	7968905000	6534714000	14890350000	3782457000	6231887000	4428984000	6994307000	3627628000	16777180000	17641800000	16674560000	9989268000	14616220000	18171100000	11911090000	21860820000	18851210000	4699023000	10190640000	14197230000	8958479000	10219040000	2790767000	5879398000	5343715000	6021915000	6910735000	0.015	0.0871	1	0.809503	0.842501
Sptan1	423527500	281461500	443529100	262748600	156538100	224832500	191377100	293415200	225264400	214048900	172246300	335028400	290019500	266945200	174779200	317019000	183523600	229786400	168820700	492202100	224117300	311967400	210594100	208396100	262518500	250391500	220716100	207579000	767232200	156627200	302203200	213090800	222031500	122231200	189109100	285520300	194175600	226949100	-0.031	-0.2691	1	0.873102	0.746153
Ctsa	35755610	40721580	102886800	61973470	118362600	39981980	38688940	92287260	46143920	47194670	54191190	77115500	115020100	191277100	80555380	180475100	193971000	248339700	245252900	28059760	36272260	86618020	83906790	39605670	45254530	59629370	62969320	34899910	62513840	159796200	127691800	196956700	98592320	76201290	175370100	284181700	204721300	171462100	-0.006	-0.0302	0.999988	0.836999	0.819435
Gapdh	2201995000	2456604000	2012212000	1450476000	564036900	1868015000	2120834000	1917178000	1033335000	1755011000	552844900	932091600	747994700	910976100	332272900	638492400	280216400	537099600	296240500	2087772000	1646198000	1264634000	969267200	2172973000	1389686000	1575617000	1269799000	1605599000	462864500	988570200	966599700	556948800	590604200	275200100	369334600	311285800	492514500	501085800	-0.132	-0.6541	0.882523	0.894774	0.527251
Ghr	1037078	1138993	149519	943832	197305	755564	2729903	492781	1395656	1448455	19380.2	167116	294536	464290	34656.9	56519.9	211257	144387	69301.5	820287	908446	799940	429582	1626609	1634409	1173529	1522130	973649	226879	334163	461577	431649	483151	48868.5	45943.7	57171.8	43082	57246.6	0.131	0.3175	0.983022	0.7277	0.871296
Lamp2	394188600	311276200	679133200	422127300	665122600	631771500	395768000	694867100	428038700	332043100	706706900	719176300	1019387000	1404266000	1473452000	1485012000	1443441000	1353453000	1455862000	278007500	280407800	511307400	678720200	428468500	480692800	527036700	634716600	248930000	763403800	1133674000	1037079000	1227285000	727548900	1355582000	1270909000	1886690000	1362584000	1425483000	-0.018	-0.0908	1	0.848333	0.804619
Eno1	748911800	611898300	530622700	392115800	142416000	400568100	524845800	411834100	325653200	586151800	195622600	246284200	220013400	331648900	98384480	166306800	110216300	164581200	91322640	498952400	414628900	359108200	226850400	552250400	365431600	452303400	404435900	524820500	179388900	214005200	277830500	220609000	187876100	135350600	125334400	127983200	189735100	169150500	-0.058	-0.3335	1	0.87958	0.718397
Ptbp1	786228	3354281	3449760	1852796	1836026	1270466	1129188	4133253	534034	635281	593227	1046411	1449622	6015412	1187239	1963439	3588985	3865540	2130653	1336490	1019690	2406814	1240876	1192347	1244181	3083647	1894530	1051922	1266898	3335767	1975024	2992375	1064346	1421281	2263846	7594995	6084835	3741857	0.153	0.7748	0.775825	0.457482	0.879719
Ap2a1	35330170	33084220	59871650	47351890	25794620	26055460	37087510	32927160	38792690	44687400	19998780	26488450	40290240	54456370	21123580	37938410	40428090	33884020	29381980	36059420	31403760	39869720	35974950	27282550	26705480	41996010	27204450	49691530	30867770	39267020	46461050	38861070	40800710	16283100	29199150	38183250	35367390	37795470	-0.019	-0.2811	1	0.874394	0.741278
Ap2a2	131384300	112929600	262981200	182570600	178927400	104102200	92706390	185227300	166783700	181235600	92010650	150181300	206478900	363653700	98851050	177338200	212863000	237133700	157899400	160098600	96453770	194357800	180045200	80465920	113142300	151360600	169485500	164201800	213044900	185520800	271009400	203868000	208577400	89048170	132806500	269059100	241935900	264233300	0.004	0.0391	1	0.821732	0.833871
Gba	55782950	47223080	121486200	52745700	123134800	75468740	48173470	91191080	45769820	28651390	99677720	136229900	152071500	265002100	232672000	270490400	215245600	229420400	234646300	45131920	44763120	75140820	82962060	55428960	55636270	52278630	53962010	31528300	101914300	176486600	131131300	206151300	124591800	239255200	218189500	283071200	259431900	261599500	-0.035	-0.1521	1	0.858154	0.787236
Selenbp1	69941920	102933800	179248700	110907000	80063270	87213790	122271500	162098400	83875200	146998700	50577910	90309970	126577900	179300700	46917640	97746850	92888870	107116100	66581970	53986540	95888750	108667700	105621700	86295370	95734850	116392200	145602200	126543400	46466050	92395850	163283400	132966800	108821200	91971160	58944780	96696170	102811400	144571900	-0.013	-0.1521	1	0.858154	0.787236
Hk1	58896130	67283200	56653870	65791900	41695990	49296190	50724730	51728550	37658650	41315970	47387980	59452340	65704340	74026160	57810250	66881200	50647880	62472390	64194240	45567650	35842050	82433790	45273910	30497640	40546740	53972020	42323040	36243320	253408900	44280260	60156830	62484670	36205100	38300780	40746450	96338410	74491720	44257080	-0.071	-0.5523	0.951678	0.893565	0.594731
Ugt2b17	1056625000	2030080000	2476748000	1677136000	1892645000	1450460000	1701310000	2178175000	2154774000	2084446000	966485100	1742802000	2718910000	3963429000	2087859000	2372504000	3159959000	2453078000	2874927000	1034423000	1667401000	2458687000	2280601000	980626700	1750150000	1863288000	2736322000	2349691000	714280000	2148674000	3916425000	3189210000	3021050000	980209000	2019503000	4837297000	2899087000	3372665000	-0.019	-0.1338	1	0.855382	0.792697
Ppia	553458300	551984800	311905700	354051600	80179300	308525600	413744800	337188700	242949600	496589200	41096720	134883600	89500340	111319600	44642970	104773900	47239000	72005330	60895940	413077600	353983200	254557900	157335600	456717800	392316400	425566400	374910700	370754200	96707000	98134620	70721610	77839160	76350610	38919400	61264720	86515460	88983570	79331820	-0.056	-0.2238	1	0.867845	0.763399
Tpi1	538973500	467394300	196026400	266649300	53181780	266120000	399005500	229212400	199123600	442945100	31561800	60067530	57529180	66741310	16597010	37135230	39663280	33730720	48799570	404098500	282194900	213246200	99762570	420063400	268256800	320973900	279116500	328266700	44050990	45391330	64865690	35050980	47248130	16621540	34280450	63960240	61867820	42181180	-0.048	-0.1537	1	0.858391	0.786747
Slc2a1	219770	1086526	333779	946838	1293616	927233	1037605	886039	921259	1435294	334710	214823	1206942	1223530	145318	372865	661534	507479	959964	707966	416391	1117578	933191	1026798	659845	1032798	957696	277428	6928985	202602	1400923	287249	238382	538029	574411	1079486	1015933	519582	0.058	0.2436	0.994394	0.758311	0.864208
Ptpra	314117	391043	406686	222308	483949	456645	646718	451450	124350	433648	254943	260781	296919	428031	231632	538940	263773	396485	923506	164760	508844	411279	295545	175876	223501	389336	162369	446787	255150	307106	402889	892504	400629	231536	375146	713009	485521	160968	-0.113	-0.7014	0.842945	0.89418	0.495195
Ctsd	431842600	519040700	1079831000	649430100	1098531000	560318600	440875300	1060402000	419864200	457864600	1063805000	1074622000	1274338000	2192697000	2466225000	2321825000	2176454000	2310823000	2334391000	337534700	411721900	977082200	872532500	473389500	479945000	664365000	639167200	397348600	1435375000	1770160000	1093324000	1972198000	1085692000	2735186000	2210493000	3256525000	2363415000	1982367000	-0.026	-0.1065	1	0.850996	0.800409
NoGeneName	12592.3	1539871	189940	473825	816602	282000	1765449	5698220	1131695	48728.5	32656	358768	16721110	1235886	102927	928439	836577	14325640	1554586	118200	162496	1174374	4818389	258418	491569	577731	3400847	929104	228921	659774	990811	881352	1141208	226907	34264.8	2995718	2620298	982812	0.041	0.0878	1	0.809313	0.84262
Bsg	274944000	341961700	588592200	243714800	333700900	220073300	304880000	363054500	271375600	262688600	186612900	317492000	386867800	681628300	220004700	287657500	245659300	374649900	281692100	217177000	358833900	288096800	231311800	187497700	223253300	248357200	275115500	210988000	317033600	409546100	469162000	354808100	360303300	189149000	239617000	382072400	350638700	430128600	-0.1	-1.1352	0.431198	0.868465	0.23073
Slc7a2	120848400	114319600	172538500	118012200	67607770	102478200	142090800	71224850	84702740	139300700	41744090	71264360	117836400	155044200	51771740	72773900	79578100	92186900	44485660	90016450	90331780	121614600	37885340	144892900	156151500	72221490	155588800	75257320	46126040	100346200	189391700	97005500	63063210	121212800	128632400	163591700	127503500	82914610	0.093	0.7984	0.757056	0.441304	0.878943
Cfl1	59138870	52618330	40263610	59372560	9649445	44651260	33430670	38259460	31844300	53657560	5623456	10336870	10908850	9915247	7183611	9220553	9172983	10403990	18166710	39178740	27033180	34523440	20594450	56490640	50416400	48960900	38614930	39304470	8651945	6366038	15747880	7149658	7397157	4371651	9222031	18898270	18618620	11023790	-0.112	-0.4904	0.980607	0.891088	0.633568
Sdc1	20704190	11700510	13947950	7373932	3642123	11120090	6745399	7766680	6260368	4292685	6441523	12017960	9381018	9103662	10846170	10580090	7159162	9102273	4858231	15120310	8753189	8702477	5658673	14066780	7814169	7054441	9201914	5306856	16185620	7620689	11457150	6152674	4237075	12936370	10918540	8994512	10118000	4349589	0.005	0.0358	1	0.82252	0.833238
Dao	5046913	8124751	6431615	6351558	2869024	9671549	6569669	9135774	4655132	6079386	4345236	3588930	6581539	8899842	5600443	6771296	5784758	9397647	5435733	24001270	6335650	7908796	9263608	10200050	5237049	7240370	9260720	5499269	676121500	5173338	8557893	4713372	10095580	4348758	6161327	8823552	6124670	7532809	0.418	1.6071	0.13654	0.050876	0.84223
Krt19	1129643	451408	386988	341852	29938.2	388157	168928	203971	186192	139069	257242	240691	72010.4	131248	249267	156889	91040.8	112534	93323.6	1599275	701458	199255	185556	654512	436303	163553	165303	240858	198047	157731	239289	217782	131972	49657.3	131444	194278	143465	68040.9	0.121	0.4924	0.93367	0.639072	0.880802
Fasn	2501838000	3181264000	1684870000	1391974000	846283700	1311944000	1539612000	1894133000	1153512000	3798422000	796225800	674773200	1296817000	1279090000	304298100	768459700	739674200	874393000	423902500	2551819000	1524517000	1564938000	1209780000	2616857000	1488656000	2071324000	1640583000	2504454000	660884500	1199854000	1462273000	1281542000	723492700	1192583000	1014035000	739008600	881570800	1353185000	0.129	0.8466	0.716598	0.408378	0.877112
Gstp1	138860900	179957900	211170200	173871200	108615900	116874200	176127300	325360900	103662200	159533600	55017930	100964200	149248200	114989100	36206770	67397870	52823530	56608170	71390760	109278800	111545200	223456800	187294000	127735800	134047100	162964300	158142300	154737700	50741940	63684010	120482000	71635420	86320570	53632410	35785540	172263700	145623000	73645790	-0.078	-0.6106	0.915069	0.894687	0.556464
F2	118410200	147053000	77026400	112153400	118905000	136340400	193050600	146471300	164581200	192908700	21935810	68722670	80847960	173371000	28065420	60434220	66832090	74159900	70802960	92482630	115560900	123923900	101057000	167273400	164859300	170974400	188896200	177892800	15635160	117831000	100161100	97524520	104899800	13010130	48083370	91371880	108976400	85090320	-0.028	-0.1577	1	0.858977	0.785516
Serpinh1	19856210	31872630	29793050	53765660	20784110	14181650	21940940	36044140	23907400	29590110	9315411	11997180	27691630	23453120	5812351	12203550	14258840	15473670	20158830	16385200	25262030	58136790	32139880	11848690	19221330	35277920	36083180	26650970	7678811	14606990	25007010	13961520	19284600	3057039	8670175	28525550	21104130	16278620	-0.075	-0.5306	0.963025	0.892847	0.608595
Cox5b	318007700	262179200	81740260	161372800	41094420	219317400	151144300	127230300	134824400	149533300	78056460	83670090	43934200	58677060	67441920	30847550	42353070	47268000	39061180	346960000	271002900	116645700	78821650	309332200	188951800	125236100	204226000	154620500	176385900	47675910	62516860	35486850	47959050	49250260	35723990	53472540	70349950	27524480	0.013	0.0524	1	0.818488	0.836367
Gstm3	17621510	21880630	16250990	11998510	8507051	9879973	11301790	23542260	5248401	16618120	2616745	6034305	10960880	11323750	2672027	4045460	3420650	7725033	10599900	11631150	9959250	16575320	13628290	14643600	11399820	9138171	12289650	12662490	3832766	4842361	6396713	5032432	5186954	8351690	6907678	24375280	13576570	5953602	0.029	0.189	0.999053	0.778261	0.857683
Cox4i1	2728815000	2024498000	2217791000	1655519000	971404400	2170000000	1289970000	1827812000	1553222000	1145777000	1534222000	2002088000	1783101000	1950358000	2364307000	1955157000	1820237000	2097095000	1289638000	2574960000	1707703000	2159122000	1415415000	2331625000	1515748000	1358792000	2300020000	1186885000	2797805000	1386120000	2210774000	2044656000	1065788000	2514042000	2147245000	2371993000	2318508000	1121423000	0.009	0.109	1	0.803424	0.846105
Hspa5	2304433000	2922089000	5598733000	4065819000	3494841000	2573366000	3016774000	6509135000	4116207000	4272152000	1434914000	2630858000	5246626000	5157436000	3022343000	3977187000	4789069000	3379834000	5230383000	1688017000	2951982000	5453499000	3445645000	1954624000	3454706000	6037353000	5612335000	4245629000	1269710000	2611719000	5051614000	4462116000	3813457000	1180760000	2612728000	6260292000	5666576000	4801790000	-0.111	-0.7712	0.778568	0.892117	0.447996
NoGeneName	196694	135202	231237	470630	328750	0	0	435060	68240.6	11183.5	16242.2	25574.8	479924	300037	64880	10899.7	477573	83378	1019970	0	101625	990401	375551	75836	122422	125621	444120	137568	12776.2	71676.9	184387	74510.4	158106	27523.8	128169	2217352	592126	87519.8	0.372	0.7963	0.758757	0.442743	0.879016
Hexb	59981000	61402770	123647400	82740820	128802800	73251440	40233300	97115480	61386730	51332060	160931600	137520300	168748000	241341600	304159800	227797400	250497700	280300100	217779300	46583180	49507740	140700400	115226200	49380270	60942090	64296800	109301200	45117100	156160100	201474600	193461900	240251800	125648000	267395800	237550200	275853600	274432500	173298300	0.002	0.0065	1	0.829244	0.827389
Prdx3	991720700	673800400	677796800	518660100	326988200	750108300	416603000	528138500	460311300	277589000	770078000	740472200	643661700	597951100	989232500	876409500	635526900	957400000	504588200	864353300	512374000	646325800	384999100	1003681000	529699500	425944100	608771500	317737500	1330342000	726072600	769778700	661979700	298951200	1460781000	1099506000	1000848000	919184600	460464900	0.05	0.3821	0.968299	0.697568	0.875931
Vim	14107800	10728850	15451800	14680810	3100687	12780650	7741276	20339110	9424119	11129590	5139595	10181280	10930100	6322454	9799389	13537910	10038590	4626811	10897590	27672720	9781352	14363330	7813080	11154270	15997830	13915960	10792380	8884670	7324493	6085022	9604142	7114505	4914412	7415714	9328062	22984620	11261310	5833334	0.024	0.1922	0.998862	0.777154	0.858097
Fcer1g	2004631	7585944	5634792	12627880	12251550	4190371	4530305	10909150	7145734	5729991	2958355	5018219	6589557	14812250	2601267	3360603	6772456	6176967	14205520	2505535	4923404	24897590	13520650	3681358	5442732	8749164	7743120	6767186	1137441	3564175	6761556	6699489	9087663	414863	1377522	9554195	13805220	4490588	-0.194	-0.9119	0.638229	0.884622	0.356474
Cyp2a5	221909100	319554000	485255300	385779400	214340000	249439400	193495800	384497200	226976000	401312100	148815300	223025900	428649200	813471300	226996900	275200700	483497100	675837900	423247600	173418200	368150000	417028600	625854700	232154500	294866500	231835500	541341000	288732700	77751180	288453200	520128000	694173200	434430600	218786300	367598200	735807300	620606300	354365000	0.048	0.3392	0.978558	0.717927	0.873011
Plg	167898200	271114800	184117800	210203300	200829700	174918600	260449100	236648900	228253000	241033900	35298030	130534300	114299300	294613500	46657300	105272300	120482500	160396000	119430200	122918100	244982100	192389600	170871200	167660200	186284200	271444800	303493300	203084700	48611230	221276600	149240400	173402600	223072400	22708170	69391340	112749500	165082100	139653800	-0.094	-0.592	0.927678	0.894456	0.568808
Tpm3	9804695	5880993	10720520	4536940	3921416	5433400	3467185	8151244	4073822	4734456	2980456	6666243	7491231	6408727	7036247	5251179	5834474	8106947	9746917	3985882	4528271	7984819	4702228	4736146	5313503	5940086	4660471	3009849	5905030	5993617	9882023	5381338	2451753	6057153	6423549	14377230	9275638	4981849	-0.069	-0.569	0.942081	0.894007	0.583906
Gna11	34161350	32822950	65597370	29109040	33203910	27102960	27548100	42874800	28872820	33789950	29724890	43546730	65290620	81508500	36214000	51974490	40369720	49447600	32665310	34940320	34406780	30143200	29859720	20777630	32215600	32751780	32739200	22616630	40016900	39193280	63848540	43556200	41652980	35072000	40253670	66475760	65612060	51984880	-0.037	-0.3728	1	0.883023	0.699448
Gnaq	8918682	9817137	17738080	8210689	8224213	6680956	7116693	12680350	5979885	7528658	6916489	11553930	14328840	23817070	10989500	13691750	11449180	11320250	10909410	8567294	7223655	7186940	5968983	5745854	7373649	9113723	8666853	4426004	13329530	9137870	12417620	14093080	9206037	8296761	9533049	20543590	16340220	14222490	-0.105	-0.8429	0.707844	0.88876	0.400492
Abcb4	28172400	54606410	22469110	13039160	23982650	20151990	34122590	12827410	19909520	25387880	15845550	24656560	22524040	33794410	14074770	13756650	14466710	14431080	19947730	35414800	26918440	20032890	14022340	15715330	13163500	13624160	17347590	17878410	33035430	36899450	23096560	12317570	15296980	10387400	12906370	33770480	18790700	22082660	-0.107	-0.8868	0.663557	0.886212	0.372254
Eno3	86858100	84647240	62391710	44620670	19663020	42120460	47336240	56638820	25762860	46018540	16678480	29778880	22581520	43474450	11159350	19793200	12457500	22095630	11306200	70684120	35009060	37653400	24818630	64834430	38404280	56903490	33447930	48220350	21284240	24853910	15042530	23515960	17320430	14065930	13761130	15906280	28545670	19568400	-0.099	-0.6005	0.922019	0.894577	0.563181
Gc	88385900	197251800	169349000	213149300	126855300	167910000	199227300	239418100	226998900	240358400	29124960	83531120	93141130	189938500	37620010	77580980	90842310	152713700	118737500	86107780	205968100	152004400	156736600	125418300	192704600	265274000	318198400	207281100	43444350	130163900	118969200	150807500	171924700	21094200	71972210	119669900	152019100	151710600	0.002	0.0108	1	0.828288	0.828274
Lmnb2	431259	493150	266798	706418	168424	489347	523137	636635	288711	635283	292562	402551	165792	233980	329323	290528	269021	484751	412198	674238	225430	1761708	403230	296913	600919	575132	566781	264770	258645	277492	754727	312270	837551	89017.9	154541	345871	356934	417877	0.04	0.2443	0.994314	0.758041	0.864284
Mfge8	653146	881567	1297306	811625	331751	1327402	716563	920994	949529	876996	267542	478418	757365	966788	548662	495583	526863	358396	782763	804202	651523	1568194	1024647	1152394	635610	994059	952592	689945	415205	768882	830510	618728	857681	307127	649010	584542	904421	539359	0.068	0.7159	0.819022	0.497702	0.881259
Tap1	12504390	25441060	44195850	99126350	73035820	12453080	17295050	55705400	23630510	29354540	13422510	19255590	83993810	44403240	17945890	20576780	78200140	33068820	116162600	11288060	22167800	154174000	96642990	12351580	21360590	33867430	47280200	40570120	5627582	23167120	60122230	36174980	32577630	6769631	15659280	156651600	137731500	33970780	-0.02	-0.0818	1	0.846758	0.806961
Tgm2	171902400	194549900	187984600	189371700	111765900	135730400	142421000	231162500	95209360	158250700	73483520	100666900	151426000	150523300	74220260	95041630	100789200	124623800	160516900	131762800	131981800	256592800	149057900	142897200	129203100	168666100	136705500	127554500	75924350	134186100	135521600	108208100	79943100	68512320	60620760	210594100	173624000	97990670	-0.085	-1.0189	0.533359	0.877107	0.292742
Il6ra	751284	468457	487116	292695	268979	566470	1190124	544380	354123	812540	98661.4	216539	256111	512292	366406	163526	503912	380326	400698	487185	501977	558375	336181	835827	806302	820426	957308	594146	171710	223848	238972	454673	439622	78980.8	151494	343406	552542	445553	-0.01	-0.0636	1	0.84346	0.811542
Fech	279271600	189891000	203776200	139425600	62398500	195979500	137961300	160461500	121259400	92399300	164800700	186820000	115108300	124378600	153853400	128331000	79918530	142725900	66959740	250282700	173358400	169660900	100400500	245354700	174390500	130174500	189234100	106634800	219051700	126213700	163410100	124522900	81583800	141371200	112462900	124044500	130191900	73258360	0.007	0.0591	1	0.816812	0.837594
Ptgs1	3983051	10895460	13651430	20892170	17315150	3959293	5746043	12333100	8734536	13521500	8823116	10498610	18548660	26090470	12602420	12389900	30188740	27785550	31693890	4077156	6106808	33914100	19913460	2094269	6080808	14988850	14141840	11519830	3818510	11201480	13366940	23095830	15004350	7076177	8051347	43715410	35227950	21412810	-0.099	-0.4876	0.981665	0.890945	0.635269
Serpina1b	36765070	64065810	38608910	44407730	61078610	55961210	73410060	53047700	69315190	47111780	16787410	53075610	42510730	111096400	39612800	45390380	65029350	57930780	50211340	23362530	55297420	33219410	35492070	35039430	46684510	57935490	68820760	37826150	13616580	97741050	52139680	44728680	69605220	24303820	46955060	62028340	69397050	57047050	-0.137	-1.1531	0.416855	0.86716	0.221881
Ap1g1	8367845	8831742	14260200	13308870	9084361	8567689	8661887	9500605	10144950	11075270	4823169	6382765	14466920	16711460	4859725	8301363	18937320	11889360	11451070	6810164	4203624	13636000	11442320	5398642	6296600	8948668	13667480	10768210	3924013	7384133	24019570	12668010	11948370	4987158	6348665	19984930	17222030	12684360	-0.062	-0.5863	0.931372	0.894362	0.572569
Eif3a	20979490	15232840	15170700	22175200	11312120	23365220	21057490	11971730	9675649	19963410	14017690	12467880	11297050	16167080	4009553	7429095	10810540	11165740	9803662	11430180	13814570	18942790	11864350	25187190	19476530	14555870	15188110	19796570	5861049	10473190	13582120	15864140	11420490	11614830	11029830	12765230	19800480	20625230	0.085	0.7745	0.776058	0.457688	0.879728
Mov10	4082486	3398484	7555023	2978735	4287688	1871742	2633120	5002782	2567290	3186595	2272503	1472064	3019209	6720715	1319267	4270684	5647718	4308958	5196400	5431092	4842760	6802982	3707017	3683906	2563785	3158554	3735544	4993212	2559482	4913134	10927150	5136199	3499526	2411398	5335818	7442877	4689972	5069912	0.263	2.2125	0.008902	0.003304	0.830945
Pnp	70802180	103672900	149182000	95629790	62376780	63621880	90831940	90602850	56824260	101862100	41901870	61384980	90450380	116410000	34449340	72749060	57410990	74912970	60970130	88769080	73480780	101129300	72271140	63920580	56866450	83704180	71757990	84764890	39208480	69185320	105929000	69937770	64334090	47927040	48510830	75215850	101549500	95199750	-0.044	-0.6089	0.916256	0.894671	0.557597
Pcmt1	578507	535534	287473	651209	94521.3	404812	397058	471823	185911	294521	89116.1	328598	185810	217583	446742	614030	294036	293172	390610	533910	565170	724717	341294	367882	675006	503111	549121	594260	269200	579122	518349	768683	462691	346968	195317	580258	545616	580886	0.429	3.121	1.3e-05	3e-06	0.828642
Ca5a	191120500	103831200	69549460	59366960	16802110	104100400	72367140	38574380	52906420	40897270	63897140	40524710	35719010	21134770	38935420	26865530	28807440	27102670	10447670	163584200	101455400	41006130	21496290	181267900	74866840	51732700	73976280	39596710	53853220	21159140	53014570	21130540	34013330	33230130	40400630	47182240	23503280	15021850	0.015	0.0654	1	0.815211	0.838728
Tsta3	4960295	7014433	3698605	6372920	1370208	4744645	7010999	3140528	3660766	7656896	617569	1187501	1670273	1715570	719249	676366	577507	768456	785556	6033477	3901185	5846010	3173718	5154786	4292897	4028617	3833355	8528824	793916	1349279	2423539	1376062	1709057	1119581	717410	1132292	1328634	2026644	0.12	0.5195	0.923311	0.623403	0.881474
Glb1	43861660	44019710	144691900	69258210	124577000	51002730	39887670	104398600	45872750	51999150	164161000	163630900	221320800	285216400	399555200	350968400	342998100	281203300	299213900	39309690	37072650	95027330	104180400	38566160	48117440	47611670	79870720	44461490	243866300	312357400	248102600	271054600	139594100	402460200	346100100	479012100	268949800	259879500	0	0.001	1	0.830452	0.826242
Ces1c	71168880	185585200	189926000	167859500	178770400	142804000	171564900	180321400	185278100	146014000	51417340	155602500	187949100	453140500	135047200	160525700	217449500	179880800	209453100	54566140	161539100	150970200	148312200	80715540	152156700	174163200	222574300	130591900	48680880	262380700	214124600	222332500	263233100	68160880	126211800	349236300	160480500	214561400	-0.102	-0.7698	0.779913	0.892171	0.448936
Itgal	17245950	18040770	21434620	37465890	26600250	10593970	10622130	25174010	13539640	14485690	13148910	19894070	33516670	27023120	17319350	22511660	34576170	33769560	68026600	12486340	11621960	47354650	32476950	10968150	15091630	23235770	17756920	10918940	6876343	17428480	23486620	26163110	14562680	6350101	11908630	72191120	52390790	20702340	-0.165	-1.0098	0.541958	0.877777	0.297922
Cat	64652600000	58281100000	71926790000	62296020000	37748570000	59146720000	56130870000	54081350000	63612170000	59803780000	39161750000	45678400000	41900210000	64577400000	42946980000	52702740000	43435900000	66055230000	45404790000	49788310000	49302640000	49351380000	50537110000	47627670000	53509360000	60485130000	68436540000	49673970000	42876970000	50213110000	45182890000	65763450000	66500000000	51458060000	54743160000	45666770000	50235720000	50822790000	-0.101	-0.9168	0.633299	0.884301	0.353428
Ppib	856303400	1585979000	1993761000	1812297000	1120579000	1027033000	1412744000	2140423000	1620219000	1940166000	260680300	917899800	1142315000	1433815000	376218700	951920100	662941200	866702500	861864700	814393500	1568816000	1954478000	1438078000	777517000	1444192000	1980526000	2293654000	2006260000	417209900	1092952000	1148959000	1116798000	1378701000	194617400	540736300	676344200	1067029000	1120269000	-0.047	-0.2756	1	0.873807	0.743529
Capg	545914	359904	796859	959078	524783	120533	312625	701841	17936.8	161653	265746	471380	1030932	710118	545921	303896	398793	1142684	1646028	137967	234404	1979420	577128	109877	217423	618210	389768	45551.5	846806	449698	879081	560471	127754	96951.4	192715	2162080	822375	202902	-0.194	-0.5917	0.927874	0.894452	0.569007
Cyp2d10	555716200	720429700	1027543000	677340000	622495300	494156900	757955000	903997500	903170100	901361100	315499500	533215700	1030168000	1530965000	618057600	802201600	1298424000	750647100	964562100	503636200	668459600	884741600	673945400	401387900	550676100	942144000	1088788000	891483500	236230900	675680600	1335212000	1302082000	908227700	357180600	586864100	1446865000	1116759000	1227821000	-0.028	-0.2345	1	0.869143	0.759486
Cyp2d11	5982709	7456987	12741880	8330197	7386752	3582493	7233997	12921820	10717720	9581424	3804424	4569204	12603140	14342260	5746315	8139010	14261800	19570060	11667980	3877085	7383906	14214480	8294502	4773101	2538264	10233270	8450488	6981180	2682550	9392407	15315130	12177900	16949410	585706	6893881	11905520	10225960	17291870	-0.182	-1.0176	0.534583	0.877203	0.293479
Gsta4	79726510	73224020	49659630	54140640	22153130	48508970	71113270	50730520	36032150	85983920	17255880	21337710	37391920	43999130	8310117	17563720	21711240	24426450	13698390	56229690	50771980	48585240	30961350	57776620	51730430	48766950	54027220	76733160	11879380	18353570	37412450	29700780	24211610	17037250	13856030	33822800	30513850	25921610	-0.022	-0.1457	1	0.857199	0.789173
Lta4h	17033290	20068020	14967830	16540560	7497353	10995850	14955780	13852300	11231120	18223690	4588691	7990467	11475120	17143400	7036448	9267342	6162464	9775866	4996091	14707770	11650770	13785690	6464820	12821720	12715140	11316530	13570490	12786940	8562470	6662628	15567510	10796480	7052172	8012931	5518921	10149720	11478010	9952309	-0.059	-0.6996	0.84452	0.894215	0.496417
Impdh2	1257827	1233412	1632956	335501	551520	1097880	899398	1254200	263579	735256	140473	780106	754728	545632	635003	388238	583239	687788	381128	1073867	792694	567940	551907	939030	978225	1097480	502030	122417	354739	473140	1236579	430799	284262	1299025	407558	967354	964629	786843	-0.025	-0.1305	1	0.854868	0.793656
Aldh1a1	689519800	532806100	678677000	514818000	257880700	463656000	550621700	617424100	311045300	634773800	296902800	272809000	449680000	660706000	182051700	278459000	255533500	480516500	164436300	484848400	409237700	459452900	530516700	542739600	355913800	423462400	535598000	566111600	255509400	280920600	700885100	482909300	313121700	328258700	219925000	300288800	400814500	461550200	-0.009	-0.0845	1	0.847234	0.806264
Acp2	23144920	18976220	38357170	37552090	45134500	27072300	21849060	45257960	22101090	19127120	31262230	38613910	64308810	71073690	55398600	65168370	79177710	76096440	100217400	16857080	17607630	53829630	70577870	25659710	24513870	32273300	35825960	19025410	34534740	55005430	54706690	76476710	39494630	67493990	59759410	151254600	98599030	76413340	0.091	0.4438	0.950374	0.665916	0.879098
M6pr	12172470	12330220	13668270	10136040	16877450	6257523	8075144	15884320	7989704	10567470	4352704	5248671	13552640	25251160	4918072	8935158	22269210	23786800	16746430	8408599	6650854	19337350	23163300	8877795	6980597	18117770	10582880	10688380	5673785	10119150	19192540	20494280	10958930	3909160	7296280	29095560	19770960	18670560	0.051	0.3527	0.975532	0.711668	0.873996
Asgr2	43164680	31312140	38207240	22426180	24911530	21350510	34395370	27097070	32709050	43989760	11292150	20483460	32016960	55130220	10786470	17765290	38314910	37767720	19611230	22292990	23917250	35496240	27351320	27961620	23836900	30394750	28339000	38030870	13003190	30778460	61866870	39086060	36709970	11620340	16340220	33554420	26404100	42520250	0.012	0.126	1	0.798475	0.848769
Hsd3b1	35000410	42813460	39901550	32877490	18419620	37281400	41336390	50477170	32305490	43851890	90441250	28432930	44638560	60492440	55019560	29665650	54411790	16295930	23070560	36594440	51274040	47944880	43388330	35244470	38626890	43464100	53585970	45483670	70456630	22996050	48132710	32764840	34433040	19089460	24368180	64713030	46479670	29644810	0.013	0.1133	1	0.802191	0.84679
Rps2	54347060	99368920	95553170	60223120	69337800	31956940	58676420	108979800	55710900	85811330	9041702	34993640	96273480	112400200	12199870	40518350	117553700	72618580	76309290	58967890	62797470	74995930	68161850	39401640	41548930	97817390	66781330	106981400	12566260	55662170	129678600	92033080	71582900	7877891	27057000	125234800	107102700	107386700	0.014	0.073	1	0.813247	0.840073
Fas	1725872	1491380	2034541	940387	2075332	919773	965381	1815824	997329	947838	471764	1554685	2031023	4004406	963194	879628	1240190	2279477	1617615	381588	1198429	1206714	1856828	974872	936375	713813	1164158	931566	620421	1563258	2020618	1129512	1615664	777192	767073	2156703	2913795	1661833	-0.192	-1.363	0.272318	0.853611	0.131951
Uox	45363330000	51577750000	58560250000	43828440000	30266670000	40878330000	41620700000	44349310000	37558310000	42735500000	27773660000	36445470000	33298500000	48274390000	21912240000	38680490000	35247140000	36770160000	33291120000	33999100000	43737490000	44605780000	38858340000	34820260000	43276810000	48045530000	50841100000	43811510000	19475810000	43853090000	40335910000	40542290000	37849330000	24939120000	33946510000	42368190000	40700530000	36908650000	-0.1	-0.8423	0.708447	0.888793	0.400883
Lyn	25485180	31489210	43587870	39403070	37300400	20695000	25912300	38093600	25322650	31533600	23205250	33512300	41775310	60995510	26727510	32137730	39968900	40309970	57424360	21976310	23148660	40204070	35794820	18366450	25280370	32622980	32480660	23635050	17643620	28787860	44296890	33633130	36656280	17453220	23204560	55247780	54707890	42399460	-0.133	-1.5305	0.178689	0.84562	0.079287
Tln1	139795000	75385090	127476600	122037600	55492110	106389200	61390980	100948900	83971770	83282940	62834510	73508380	94531570	94691860	76019860	96561320	82987930	91124020	102081600	103872500	62487210	126174900	84734830	88200450	93540920	100388600	88315670	62708110	86021220	53577790	96116740	84895000	57638490	50134220	73351800	146901300	118581700	86536650	-0.076	-1.0135	0.538452	0.877505	0.29581
Ezr	705890	538611	1772700	1953399	556121	794603	564414	1009210	807232	1586285	665353	837292	1144541	1038352	803211	824020	1331241	456670	1973625	2742138	861073	2099655	1124605	1910871	741572	1032759	2600827	1006503	46204860	817431	1844030	717827	624795	454439	545197	2997693	1418099	725995	0.4	1.5389	0.171937	0.066167	0.844377
Msn	104626100	81690020	135208000	177817400	125447300	92382050	61664570	143172600	94024980	103128600	53624700	109320800	127067500	119796900	87892070	88540820	162380900	112017300	211483400	70098290	79184060	216558000	155281000	61212550	114944400	155075200	122416800	101548800	133104100	71252620	146016500	110919400	93640490	24322880	51290480	239688000	163925400	108555600	-0.064	-0.5331	0.961783	0.892938	0.60701
Rdx	57128540	50986270	99075210	85487270	44652240	86549190	51334760	82309620	87462530	89478920	43501290	55059090	65551720	97187480	56370810	46711680	62361030	74330360	54123340	82283680	63562530	74122130	76454710	54713780	90127600	79522550	81895490	75646270	88123980	50191340	83309830	63094580	71874370	41172690	67537360	70108060	82737460	78227370	0.066	0.8989	0.670365	0.373131	0.874803
Hsd3b3	152573900	210486900	198565200	171146100	131621100	181730200	198765000	271805000	139317500	224606500	142496700	124359200	273456800	312916200	214326900	176710000	300255800	109921400	150740900	155828900	203475300	240773100	205943200	142571500	186797800	219992700	217047800	193309000	105756800	191332100	302785000	216518500	214822600	133359500	157833200	411882000	229736900	176794200	0.023	0.3162	0.983274	0.728275	0.871189
Ctnna1	113506100	84269910	137432400	83037510	84221070	79852750	64236620	104438800	66715150	77760920	82613190	110188500	137866800	169889500	114008000	121445900	103794500	121110600	110340100	122589000	68815470	92593270	77724210	64635700	75647930	86082350	75018410	60993430	174024400	73363400	116621600	110299400	85493000	72795720	97178840	155215200	138738100	136041000	-0.076	-0.7651	0.784413	0.892349	0.452095
Klkb1	1417150	3089463	2350457	1423417	3766850	2351735	4072149	1637004	1380532	1657174	915973	2873891	2045925	8592579	937620	1879825	2100365	2168161	1330462	1788666	4700034	1894678	1612087	1458207	1483562	1534704	914726	1373235	487184	7047164	3609911	1711158	4296387	1074902	1451709	2579773	1273516	1278861	-0.17	-0.8814	0.669014	0.886542	0.375686
Glud1	15327570000	10099130000	8012368000	6270570000	2008535000	12848330000	7174176000	7375722000	6222834000	4801020000	6046296000	6512080000	3553992000	2959973000	3664916000	3681605000	2432523000	2863070000	1292698000	13311690000	8795752000	5604367000	4056268000	16842560000	8907575000	6884970000	9991352000	5821612000	7310449000	4647018000	5393014000	2582304000	2066508000	3268209000	3423231000	4150261000	2875690000	1482982000	-0.003	-0.0182	1	0.834541	0.822115
Pik3r1	241882	277073	355049	111793	196998	92410.2	135182	236110	129637	210193	34436.8	149338	275940	415585	196032	251880	229953	462710	201743	114919	148889	262847	265394	192375	120185	311998	292146	217909	70716.3	310972	231716	453061	138795	127234	135462	725791	400514	306872	0.115	0.7035	0.827397	0.506097	0.881507
Psmd7	7302667	6789699	4876026	5000042	3304817	4014888	7100669	4248003	3638498	7549783	2189983	3585079	6067490	7770118	2067910	6004248	4561570	4936346	4030347	6763843	6436108	5713719	4084441	5059902	3782374	5708527	6235932	6352318	3171885	3249710	7048023	6028457	3741529	3862206	2398812	7965677	4119114	6173950	0.035	0.4142	0.959429	0.681446	0.877725
Sars	1449492	2467246	5074662	1569979	820614	2009082	2180501	3035783	904663	1764323	1376036	2791996	1996922	3687718	929352	1186377	761396	669309	708713	1924824	2027870	1735434	1063442	1642239	1473233	2150522	1918218	1233748	899638	1833292	2500127	759732	753172	1110889	1213894	1718433	1858186	995388	-0.106	-0.7322	0.815274	0.893433	0.474308
Marcks	4696398	6944919	5494441	5404686	2817089	3491708	2922863	5583705	1793121	3052622	931470	3014724	3418968	4138134	1794145	2302738	2379028	5112647	5604096	3439567	5345528	5797240	3029606	2860619	3123152	4302325	3446489	1986391	454821	2564988	3428354	2530092	2059886	552988	1316645	4362550	6129379	1901386	-0.272	-1.9171	0.046647	0.834789	0.017709
Mst1	375224	792717	939470	1945625	1456812	694125	1429359	560978	1454172	2540145	458064	176012	1352543	2732323	793886	779553	2819279	1062695	1398435	411736	1110926	1607745	1748819	551147	1212034	1271391	2476169	2661556	544835	1524244	1645268	2823625	681170	468928	846810	2317406	1131052	3205435	0.194	1.011	0.568702	0.300755	0.869089
Man2a1	114721700	591529600	864414000	791425100	883537900	366382200	546582400	939153000	742597200	692051500	246486600	402500900	1201277000	1384848000	568725700	803481500	1621824000	1049697000	1431280000	159155400	567991800	967940000	856320300	213623500	400666700	854577100	1130733000	497616400	231970000	742631400	1226326000	1120224000	935522200	272876700	1041498000	2343173000	1816552000	1025994000	-0.017	-0.0788	1	0.846224	0.80773
Map4	4841415	4817289	3993337	3002100	1378426	5736141	4494090	4596421	5950328	4816416	2510029	1447874	2548862	3647209	2041455	2650704	1338643	2242071	777216	5849792	5354145	3032871	3954961	3897041	2653701	4823539	1931677	2547295	1950641	1877727	3052709	2396220	3539781	1585806	1850112	2465374	2489403	2640332	-0.045	-0.3285	1	0.879115	0.720696
Gna13	213637100	252990800	308391500	280605600	226806600	180891300	239479100	325039500	185727800	207681200	200127900	246705900	423211400	382817300	214927800	277630500	315435100	289413800	268716100	210394900	253642800	280574800	238650200	175314300	205199700	274355400	274203600	258735000	256276400	204236300	355091800	313233200	253021900	132843000	178551800	446570400	357226100	361495300	-0.04	-0.5547	0.950345	0.893635	0.593183
Plaa	4251194	2304914	5099036	3080622	3577627	4013641	3568435	3302648	2836592	2236799	1919897	2394607	2872516	3451817	2393267	3274053	3041244	3621185	2599483	4289891	2792192	4117915	3506976	3311936	3446512	2866810	4127158	1474355	2164957	2507930	3474457	2297766	2626177	2340833	2804845	3444416	5990327	3255574	-0.022	-0.2656	1	0.872718	0.74755
Lipc	6216169	3211029	1202553	1791740	585813	4060751	5760895	3340968	4165723	6263751	263497	610491	334855	1384955	285618	547228	392389	611591	429402	2054876	2476881	1801518	1090959	3989976	4902593	5451290	6205136	4066739	276162	763389	1225564	864262	1524197	249132	280040	910279	566294	934715	0.06	0.2006	0.998312	0.774212	0.859163
Rpl3	138277600	540592600	642272400	543514800	709583700	238496200	417668300	743254600	641430900	626776200	128112000	335899100	770935800	1345951000	214215800	544109500	847006900	723395800	714062000	166571800	449071100	741243300	690022700	182503200	345779500	625310700	805403500	690539600	114745400	633879500	1195501000	1012562000	838606500	113185600	411582700	949056500	795692700	847565100	-0.009	-0.0425	1	0.839441	0.816603
H2afx	195119800	166051400	196899600	238432300	54668260	101140600	96996880	194922400	70613450	151849300	67649870	46437940	158813600	99388120	37470500	86807290	81986360	91557970	55128530	356384600	119746400	269403800	57017680	187360200	117272900	174645300	144341600	191719900	268896100	49008930	192834600	94560120	53706660	32284960	79774050	130514500	125909800	134266800	0.174	1.0491	0.534671	0.277481	0.867021
Pdia3	1978301000	3435076000	4523133000	4067873000	2531865000	2208799000	3202846000	4393454000	3554608000	3881178000	830471800	2136127000	3436374000	3259050000	1091738000	2535782000	2327297000	2256258000	3009277000	1567290000	3228401000	4654606000	3188377000	1818763000	3036666000	4512924000	4623993000	4270633000	919853000	2278924000	3886969000	2924753000	2881974000	525926800	1349663000	3384788000	3359028000	3087194000	-0.071	-0.4577	0.991623	0.889253	0.653083
Cyp17a1	107696500	240310900	209296400	207592300	161554000	162463700	98778250	82021200	258518000	415701000	187300200	127427700	217314900	370892600	126285800	166905700	176277400	519419200	136750600	153137500	220209700	128521700	471744700	140440500	181774900	160457600	432136600	208916200	73790910	256452000	276725400	615960300	387444200	182870300	446298900	150529900	351802500	249533100	0.183	1.1654	0.435022	0.211633	0.860713
Mgat1	5528510	25361240	34184090	38066800	43841870	12536060	22928970	33523590	36004080	27327940	10213290	16250310	51962450	61979930	19667530	29911470	69418540	47291360	62346240	7299693	23179380	40183630	40179800	8436128	16603950	34025840	47512550	21069980	11167150	25925990	60372340	48105920	48931820	8918105	40923050	100007900	74600250	39934080	0.001	0.0025	1	0.830124	0.826557
Psmb8	3242322	9258667	18736850	21217350	12199070	5274709	12082830	17521190	9326997	14579800	1662939	7175436	11773860	9222284	1802418	5510462	6334301	6833210	7072728	7509653	7216957	22938410	16142480	7761531	8256296	10536900	10840060	19304320	2016020	5389486	15828200	5904187	7309020	2947850	2372785	6243454	10904050	5902243	-0.008	-0.0502	1	0.840933	0.814787
Gjb1	71811660	91470350	31322900	48913990	54406830	79967070	82531510	34785710	54276820	93599480	25911760	53407940	38257450	105368300	41980010	26354630	35814350	34351440	21944260	84109810	44911600	42806650	51662030	58695300	65203290	52575590	55952740	82563500	15945570	17635430	45413560	37262860	44565640	27521980	12181200	17001930	51336900	81149890	-0.179	-1.0733	0.483685	0.873057	0.262763
Aco1	343216600	323587400	352259400	257691100	152828100	253383400	362762000	283106000	189632200	391809400	154047800	170535700	271940600	338148200	119722200	223083700	167055700	193033700	125299400	300085100	245064500	233814100	194015300	262235000	233045200	247023000	275825700	330455900	120965300	188287000	382786200	220952700	188775100	145596100	135872600	185726600	194220400	268658200	-0.087	-0.9814	0.569253	0.879841	0.314384
Ctsg	628296	835972	1190688	617611	308354	444297	352155	1662652	632297	354427	189946	217977	405209	577991	493629	82881.1	295775	723576	930496	294140	861143	566486	194716	665228	426329	684856	449147	233724	203592	449995	334277	381642	123914	317672	513134	791937	3250160	245487	-0.106	-0.5553	0.950009	0.893652	0.592796
Apex1	1869220	3026797	4346701	6906563	4467229	2530553	2764618	3163872	2389880	4210497	825928	3661839	2452513	6725018	1035444	935874	1345579	2750877	2907052	2300492	2919129	5428009	2096167	1350872	2289873	3074405	1311614	2446378	2194547	2035940	1744598	1859645	2450472	1136030	859892	2209270	3376570	2268679	-0.247	-1.8329	0.064595	0.836419	0.025516
Adh5	337619200	278143700	228501300	192422600	82116720	188153100	244764400	216669700	138443200	248481000	70038050	87081260	120656700	173304800	41263840	77736330	72560160	93286350	47213590	235512500	177166900	208631000	96088570	225085900	159082700	208456500	186020500	197263500	60515020	93822960	189444100	102655000	92336320	69430810	46931090	77798240	93832640	116655200	-0.065	-0.4101	1	0.885971	0.679972
Adssl1	172426	1525181	1984915	523112	868369	518902	648090	616830	396739	517046	188910	192629	1181285	2186886	348487	796968	815975	1121424	60097.8	271618	440664	416772	471486	347091	512034	1107989	829938	1263290	283985	697001	620373	1608422	870214	260468	966930	896946	511916	1456702	0.081	0.354	0.975231	0.711058	0.874088
Bgn	5056825	3933568	3379485	3226615	2910805	5045101	2692320	3899917	4723251	6050752	881229	1972053	2532081	3067907	962600	1854774	1118995	1915204	1438971	3335017	2496007	5010539	2995705	4258192	5701806	2784511	4796315	4096783	1574986	1419377	2855999	2605970	2475457	1437346	2292569	3586689	2850282	2028017	0.085	0.6696	0.84898	0.528835	0.882035
Dcn	7692684	5053534	2131086	5573568	765891	4853049	8371806	3271530	6894335	8910226	1320502	1610413	1206353	1536469	247573	2843087	956656	1660208	1376497	5605099	4895101	3272245	1709774	5716895	6188290	5430310	6307242	6758135	1076422	1510151	1996541	2839765	1329253	1038925	2150290	3560373	2331143	1113811	0.123	0.5154	0.924929	0.625805	0.881385
Nap1l1	3741524	3322097	2964835	1619113	1833979	924183	3345888	3349409	1338131	5252874	1778522	2467869	1667475	3790897	2673570	3183829	356016	2895292	4151838	1449169	1118744	2119165	3831504	1847246	2688710	743627	5646726	3757159	1301546	1951461	2669390	2053863	3587410	1729053	602737	2136657	5259072	1846855	-0.091	-0.4527	0.993054	0.888942	0.655997
Nckap1	1778379	3043619	5919688	6651621	2555046	4137826	2385614	3898933	4422910	6077824	2806767	3044441	5557845	5588698	4258795	6173231	7674293	6837623	5661252	3155068	2824053	5900804	4556990	2519768	4780753	4031541	5992919	3310450	4015651	3222801	6802548	5405006	2394226	3409873	6988672	11576850	9384037	8151960	0.063	0.444	0.95031	0.665809	0.879107
Mug1	126916100	155024800	167044000	148254900	194726400	144527400	257567200	178335500	242514100	176573800	59490480	151401400	222814400	362511200	185890600	203732000	304260000	187721800	246288500	67716530	131009200	193241900	148621900	83239340	128634000	274088600	257420200	180212100	58259540	199699000	263002600	204738300	223131200	70531940	110504000	382537500	235309400	313458800	-0.148	-1.1658	0.406904	0.866244	0.215714
Mug2	35212790	29523390	51033760	58108200	40272630	36574830	60486590	69063440	60875350	65902300	11815590	38493270	74576500	69078530	44175760	73430770	95548660	44895080	69634880	26952920	33346870	81920580	30196340	32345960	47596720	101692300	101373900	80885070	13437610	32481050	70626170	63820300	38587720	11467610	24355350	133775700	93289320	79400230	-0.075	-0.5074	0.97372	0.8919	0.623129
Marcksl1	214717	563329	234345	324100	138040	280729	200144	430509	80353.4	146581	56540.9	274035	49786.2	94968.9	49891.3	82105.8	80183.5	205871	179101	225023	376800	191949	140268	224210	248893	277544	102893	21552.7	26001.3	61181.8	145154	107066	67436.4	15489.7	25025.6	53276.5	192693	75128.2	-0.474	-2.0378	0.028619	0.833004	0.010028
Mep1a	812845	1353634	765768	822524	349855	603822	749508	700817	6682739	642683	780456	498613	643058	891889	819037	793139	609017	400612	636096	4716613	888406	1003697	644530	749534	746273	601884	736351	506258	84814130	378647	752399	755048	742513	1030581	849006	840732	1228224	405535	0.24	0.7443	0.79888	0.478362	0.88059
Dpp4	722984400	783152800	738476500	588484900	498170700	571094700	700551200	594665700	579383500	792814900	398516000	625722800	739968300	1039462000	623651400	817647600	765774500	633057400	738131200	698177000	591649100	672132000	584635000	580388200	594771500	559297000	794294400	626396400	679564300	693204400	931052400	808937800	593528100	461745800	611410800	1095653000	781998000	868459000	-0.015	-0.2968	1	0.876023	0.734698
Pabpc1	30417450	67502660	99354630	49117310	36292700	50279700	48113000	111099600	41328900	55481870	14321030	32088720	46711060	59821380	17844540	31266590	38237580	32839320	22495770	40992670	39182830	49786830	59806540	36800650	32282340	90620860	67940020	60728480	15102690	55101120	46078860	39977510	51311880	13793880	17693770	35330370	36050200	40231710	-0.037	-0.3273	1	0.879003	0.721243
Ptpn6	1332039	1338146	2050565	3339351	1529898	1090269	572365	2057780	1320774	1147396	873551	1550963	1631297	2189800	2055675	2077685	1702827	1338587	1935368	1393891	1228628	4002802	2033549	999459	818310	1432539	1650027	1430490	862712	1582244	2449001	1628078	1324365	1383373	1142249	2536155	1790117	1843283	-0.007	-0.0671	1	0.844106	0.810677
Gnb4	376004	330685	458282	471624	608224	429892	321083	801063	329486	201604	310108	553156	908215	1099050	791725	591466	625033	824763	1026496	494677	322460	811085	370694	210865	427326	340529	281970	163830	529183	712192	768228	879141	379940	408509	486376	1725963	1083280	512358	-0.085	-0.447	0.994606	0.888576	0.659295
Ftl1	569656900	518017000	1021504000	800456000	757093400	713356700	578399600	889530000	521502700	762725200	683740500	896841900	1105928000	1692810000	1130718000	1227935000	771547200	836539200	993558300	352835400	410144600	816045800	734230300	479106800	537066600	548997800	834742800	598050900	404702400	754419800	833356300	1478148000	865378800	1011331000	805842200	1614409000	1426219000	1505590000	-0.105	-0.7588	0.790413	0.892579	0.456337
Hexa	41350460	67171520	98214920	82110310	118073700	52511440	51112940	99958290	57762410	54233750	133330500	110136200	140911900	200541900	221272200	181772900	215984700	230322400	225341100	41150230	54156930	128794300	119285500	51631920	53228690	71531280	91076610	48388590	111335500	182392600	168910000	195401100	103661200	217266200	177268900	311935200	235531700	171529100	0.057	0.2761	0.99013	0.74536	0.867567
Vcam1	1711143	3103092	3514408	5031559	3090172	1661681	2640677	3957289	3306011	3578562	679034	2047255	3519486	5806234	2432894	2939788	3048328	5420648	15254690	1291933	2410633	8450312	3951623	2769044	2000963	2812425	4532992	2956358	2784021	1750239	2589228	3817336	2532396	948977	2942879	10437450	12272030	4427526	0.005	0.0273	1	0.824522	0.831585
Ahsg	60541470	79251030	26919740	34433270	18636500	39919920	85855810	36488320	48412290	43277290	2743542	20431170	19552850	30556100	6747317	12572620	11341210	16198080	10715660	32416170	60452330	24513660	13536120	41465620	41203260	62342210	56658660	43239240	3899536	22987040	19453320	31478050	19519820	8668909	10206030	12571240	16697150	19393700	-0.032	-0.1412	1	0.856518	0.790517
Oat	14745070000	8610967000	10994340000	7762068000	2502283000	12410660000	4422580000	6022007000	5308464000	4035931000	6655741000	9167395000	11095770000	6860536000	9193057000	8187634000	6064140000	16907810000	3404894000	9975918000	6531271000	6368359000	5183231000	14331830000	9444702000	4369055000	10518520000	3169048000	11505570000	8033774000	14069730000	8476358000	3613651000	23617650000	17958840000	9633492000	7634021000	3732162000	0.032	0.222	0.996599	0.766474	0.86176
Vtn	127245100	113222600	75549410	93448020	89061080	144871900	162453300	181751300	154564900	159466700	25968930	52462400	81051850	132899900	58843710	72543830	107817200	81132430	108268200	75372430	78904520	122553700	67238220	138729900	144900500	201944100	165501000	113810100	22450050	69869690	75686310	84019360	64476010	30357600	57256390	169406700	116179200	83842420	-0.14	-1.0156	0.536468	0.877351	0.294615
Gsta3	2045051000	1813085000	1322080000	1829743000	927416200	1679735000	1901551000	1311627000	1266941000	2640639000	525477800	857942800	960061100	1714218000	538848000	828182600	585259300	868787100	633514900	1370325000	1526610000	1503370000	1408896000	1790623000	1530870000	1307850000	1679207000	2523400000	386814300	688150900	878799100	902139400	1158505000	637854800	594128000	543863400	1032045000	1129869000	-0.074	-0.5346	0.96103	0.892992	0.606058
Msr1	161846	296761	372249	469297	502965	218604	119475	332883	175531	152530	117250	187715	306504	293432	351579	279736	219314	410359	357731	35855.8	160100	497684	292796	236918	135137	236082	153609	126722	105931	121818	816971	307153	204339	101185	114668	644343	388342	183088	-0.283	-1.5648	0.161744	0.84427	0.070669
Ckmt1	1435529	257354	0	1253172	415638	1344600	695690	52656.4	1060922	1421307	283501	472769	762200	3134520	488650	468603	225938	1011138	1079302	4326161	458319	445727	1093019	516129	184483	1946223	579095	922351	39324110	310892	4694763	764597	1192026	308010	199049	1637013	1475268	813889	0.573	1.4541	0.221843	0.089794	0.847398
Alox5ap	807903	1067115	2059735	2272655	2127572	803722	1054576	1973307	1763249	1725406	679897	1112122	1185168	2331064	1015951	1602217	3565169	1175887	4097066	1179018	651222	3972299	1819292	665915	433433	1846099	1996894	1931312	316319	2337079	3445221	2432571	2373880	1037432	1362714	3261603	3806266	2478029	0.032	0.1792	0.999583	0.781604	0.856394
Ppic	528718	539645	787001	655036	601189	504555	516666	796556	384966	234608	315920	378091	1458965	432373	908856	517125	799813	489548	744980	1101551	1183156	288374	653653	727972	848127	851482	1695481	525971	1235479	564825	942463	553246	895064	284932	612514	1231156	494563	1386848	0.269	1.7278	0.084748	0.030937	0.838954
Fkbp4	23360830	16841110	12951310	17658290	6775386	11429040	17441330	17535860	10452310	26004130	4501216	5471768	11971910	11807760	4165106	6449825	8016355	11775830	6502763	16200710	11380930	16726680	10377870	13794130	9738424	16031920	15558250	22995980	9473158	4699642	15406300	9056516	8719023	7053550	3871716	12098130	9465423	11796990	0.009	0.0801	1	0.811378	0.841307
Ctnnd1	108161300	86580750	118170700	96992940	55522210	78058940	63510420	79707170	71797150	83684050	52706270	73924720	73068540	87892260	45197570	79439380	54050000	68977270	57123080	137639000	67792700	83057030	65293990	70123770	76774530	80649280	70991570	62424880	84927350	44474190	73474000	60662640	60514160	28482770	50783860	80698350	89080740	88670700	-0.082	-1.0227	0.529791	0.876826	0.290593
Aimp1	377934	658205	523668	487936	206060	398514	501597	601762	469772	676072	31940.2	315199	513396	343819	327544	529519	324077	292171	99631.2	550863	568560	394091	195474	516874	379650	402216	412549	354360	395471	236583	424452	109554	172101	148796	195794	92407	531916	133584	-0.177	-1.0134	0.538547	0.877512	0.295867
Slc6a13	11690750	28291340	28848840	9372473	16935250	13204000	17584690	23306570	11952120	17453090	9686289	26126340	26579670	45842240	15581660	17752130	15927690	20312550	11876340	15706930	22960000	12867320	10360340	13802730	15278190	14373760	14269510	12136370	8465960	22470690	21997280	18894680	14546060	13841600	18267600	26361030	26725690	21539460	-0.093	-0.8435	0.707241	0.888728	0.400101
Slc6a12	73398850	97603040	180886900	72698430	79949510	64913430	73562630	74055100	64790880	76160550	83929460	118083000	130336100	233375000	94224740	125658700	85505290	130217600	62395820	73493770	97399960	53500020	56394150	58153580	77995630	59107060	78618370	68423540	60659780	111071100	117772500	116064200	114878300	96525710	113130200	93841500	129326500	151317300	-0.098	-0.8639	0.686691	0.887582	0.386889
Dbi	3935659	4883071	1727933	1573646	713129	226656	2093474	2383585	2136087	4505345	120288	858616	1103539	525892	1623963	1016670	692584	871117	221523	1909843	2974568	1024932	91178.5	5673249	3529195	1731032	4063949	4273846	534573	1391126	816740	951923	889034	1915625	2032735	765678	141600	1028634	0.171	0.508	0.927803	0.630112	0.881212
Ceacam1	17644200	30364830	17627340	8354735	10182620	8588014	10116820	16999040	6311149	10994690	7465957	16549080	12293270	32323160	11990270	11008480	11855310	13504970	10316380	21826040	12970420	11091590	6980329	12602620	6805970	14675940	13014900	7661706	16688520	19705490	9135302	14957170	6564081	8498369	12256540	20114940	20693870	16293010	-0.035	-0.2672	1	0.872894	0.746913
Map2k1	1062822	731546	3011859	1606731	2257299	623086	547636	3921756	974016	1728460	690602	432916	3606639	4892882	2726216	1009671	3713009	4112033	2582267	1241562	1881814	969998	2573594	396981	728177	1663665	1422517	1723643	2153296	2305040	2850492	3730707	1792964	1331924	1947872	4413276	3144409	3230649	0.078	0.3457	0.977125	0.71493	0.873493
Cd68	98099.3	119702	110063	152429	102709	0	76330.5	75637	78459.8	0	102966	52551.3	51896.5	12046.6	102797	121874	148730	185970	366220	158594	29396	142402	158093	46144.8	0	46668.8	152801	28557.5	50042.6	46916.2	49282.1	127579	11647.3	95721.1	23803.9	1762233	510497	10259.4	-0.097	-0.2302	1	0.868626	0.76107
Scp2	16527800000	15118480000	10039670000	17523350000	7040072000	16757740000	20527630000	12185410000	15985800000	17105180000	6432858000	8016451000	7994267000	8058068000	8016363000	7380988000	5890460000	4561245000	6436249000	11729200000	13887710000	14834840000	17161010000	13685360000	13343710000	16788900000	20211890000	18922080000	6317049000	5858713000	8432193000	5900455000	8861201000	5640480000	5314028000	8539693000	6830862000	7331831000	-0.059	-0.4003	1	0.885225	0.685233
Drg1	2166169	8106030	10850460	7613463	9165815	1391709	7623610	12316610	7432318	11094950	2178278	4344792	8146699	14513690	1404115	8416468	10212780	9288490	8116031	2855667	8820529	11063080	10330490	2062856	5080276	7874856	10538750	10612200	1726107	9425206	13467510	10076820	10273210	886634	6192715	8585619	10265070	10010660	0.022	0.1111	1	0.802824	0.846441
Serpinc1	276367700	329598600	290705500	266261400	312855100	296707900	367870400	344779500	326553400	333394700	71516050	222445300	301043400	642752100	154837600	268458300	332094100	262824800	285404300	184153000	280725100	267261900	226916700	258665100	321196000	319131800	370108300	310340500	74809240	409720600	295306500	332328300	347833500	90713140	179825900	405251100	286163700	346395900	-0.104	-0.9774	0.573148	0.880128	0.316738
Nectin2	591457	344952	261749	355793	260108	84279.9	159197	410501	383962	115418	99434.8	382059	602913	859187	962737	392520	855394	553008	390272	121692	716049	488438	166547	259691	493978	259209	674296	362624	384664	114077	1267430	488496	269202	545358	271977	1014478	858636	661341	0.147	0.6648	0.85188	0.532025	0.882092
Kras	2015217	3158159	2210668	4377429	3737579	3400672	2021561	3876493	2819121	3409487	2143003	2715145	3822986	3481636	1327338	1397764	2300876	2449574	2704817	3498581	4424226	4489755	3235206	2299431	4958428	3627636	3608877	2325930	2930137	3017933	6155756	3258668	2802389	1919419	1602429	7652005	3140496	2119756	0.186	1.9843	0.024961	0.009929	0.833709
Wars	1041097	1267481	3469771	2392198	934888	818434	1770594	3160691	595613	912793	274974	968231	1787737	1535936	255023	698265	1110312	640048	1751263	1120201	1670973	2919841	1210692	934112	673423	2490800	1158976	1180712	948058	854142	3412382	976165	244604	322157	781432	2915648	1955380	647456	0.036	0.2161	0.997118	0.768642	0.861061
Cyp2f2	804003900	1442807000	1649332000	1079357000	1362955000	1047514000	1282733000	1542434000	1645519000	2323590000	918028800	1215535000	2013180000	2445511000	1224813000	1477959000	2455870000	1725268000	1545771000	844368000	1520278000	1251166000	1380261000	786596400	1310639000	1652845000	2305835000	1928765000	383887300	981686700	2389334000	2455940000	1936459000	712376800	1104916000	3038634000	2141472000	2117330000	-0.063	-0.4862	0.982185	0.890872	0.636117
Proc	7631976	11391480	8738718	10737020	11103410	11587640	17728070	12659930	15048070	17427010	2362475	7032910	13668590	24129450	4193247	8287520	12349630	9052400	10272710	6129709	12832000	11047250	8843852	9332723	15685180	12018870	15451600	14336960	2559971	12645790	15163000	13654730	16878400	1587472	5462422	10560720	8208535	11093160	-0.091	-0.6414	0.892441	0.894813	0.535819
Apoc3	39728970	34573470	6030569	16950040	6080915	28208180	64419830	13816300	30217500	59554000	853906	6288717	9738777	17728230	1329176	4867329	5673797	5809659	6239178	25506200	28013400	26019410	17471300	45470890	26882230	32014050	58077900	32387570	1453171	5617656	6994023	9007013	12739390	378482	2128831	8154037	7305065	8524732	-0.032	-0.0874	1	0.847742	0.80551
Ephx2	8688863000	10004040000	15544540000	16100470000	10496690000	11285670000	12696010000	10106690000	12592090000	11831900000	7861094000	7412938000	11270190000	14237940000	9034458000	11139320000	10303710000	10678120000	13964250000	8458304000	8487124000	15270360000	17119610000	8378040000	9262174000	11087610000	14687870000	10910260000	6389328000	12329330000	15164570000	13838670000	11946720000	11852440000	14211550000	18261750000	11265810000	12491730000	0	0.0026	1	0.830102	0.826578
Asgr1	184516900	175282000	205751500	136939300	159039000	106706000	176938300	199720500	148895300	252189900	55260340	104159400	198367300	326394200	47532330	91430690	187184600	194181600	120469300	119139400	121712700	166796900	173451700	174336900	119139700	194087400	179444100	229144400	49501540	121375000	228203400	191010600	205010100	44199970	71435690	166015300	151919600	262582500	-0.062	-0.5373	0.959659	0.893086	0.60434
Apoc1	37069880	25106850	7203396	11390130	12457680	13719980	31538830	10225660	6584531	27371360	2976535	8545283	17401100	23366300	6672314	11618260	18460540	10024350	9980278	21723380	16502230	11514550	10966410	34127080	18832940	10585740	18386970	16108520	3680352	18662170	14513030	15871810	10498270	2113595	3860955	20814410	10063120	8572705	-0.079	-0.4592	0.991181	0.889345	0.652206
Usp4	31919810	23750060	21106570	18503300	31705550	19571580	28661210	21914380	33808440	40761660	8903331	13390070	12381340	16314350	11444800	9243552	11873410	16613220	9828364	24102310	31394170	30571430	15429930	21935760	44270250	9064066	20957410	24059530	26838550	46108420	11637640	11975250	10798070	6074309	10941960	28834180	9010425	18924020	0.015	0.0896	1	0.808825	0.842923
Ptpn11	1227495	1946683	2144022	1170663	914858	988322	1207205	1652043	935855	1506420	743687	708460	1081703	1441710	1004630	1417150	737408	613572	764305	795060	875840	1378928	771970	894008	1076736	851958	1251145	908062	506167	761296	1749536	816193	770354	204420	697618	1359180	1063964	946016	-0.276	-3.167	1.2e-05	0.828362	8e-06
Rab5c	42094900	44709190	34737170	37119610	21619470	38264500	37609520	37833630	26864140	35337040	23766230	31634060	25266470	61083910	41353370	22486390	13602850	15629580	30964210	29387040	39141590	47006690	32621220	30677420	33850970	36576760	38113720	26219210	45405580	25586140	39294450	21357280	31796190	21477610	15045060	20340740	23421340	17496280	-0.07	-0.6372	0.895649	0.894815	0.538646
Rab6a	399033500	436083100	799925400	601381400	510644200	453632300	491126700	726130000	490261500	556141000	302929400	418251100	756523300	942317800	535295800	616236200	848492500	704205100	764623500	457141200	449758000	774851200	565531300	357204200	469865100	677091700	748254200	513793600	459954600	523339300	860603300	749505700	528052700	461436700	665454300	1259726000	815417100	738191100	0.01	0.1115	1	0.802709	0.846504
Rab21	30373870	49508820	47247920	36342980	22111850	34715240	35515890	36231420	28678020	34923750	21041850	29284780	19843000	53426060	38445460	26794680	17412470	17204970	13140370	29396590	44717490	33376250	31331880	29183600	34704840	40721990	35212990	34067370	34475070	49575840	31977410	26022990	33106860	21320870	22970870	16662230	21535560	22455450	0.012	0.1085	1	0.803566	0.846025
Rab12	1781553	3243885	3753906	6110806	2796309	3799485	3338031	2730655	3901609	4180050	2667940	2022716	1931933	3802557	2914195	2807085	1832801	2384307	1995184	2226093	1953908	3631649	3779767	1695730	2981114	3381066	4966628	4133938	2225545	2853366	4590913	2708583	3835902	1972319	2985992	1630749	1302081	2701790	-0.065	-0.5215	0.967398	0.892498	0.614333
Rab22a	9998353	9972063	11426560	11328130	6765841	7831244	8007619	11931840	7757016	5354815	4925881	8504063	12946430	11452260	7787387	7519843	11756620	8145447	9850824	8100452	7798108	17764390	8256758	8231666	8106360	10991970	9969195	5975101	8645697	8412967	11970000	9822398	4422012	4752142	5970091	18841230	12567420	6047929	-0.034	-0.4037	1	0.885486	0.683419
Rab24	2598107	4938797	6035458	5213189	3955278	5055953	4248087	6777194	4448830	4780674	5728166	4267398	5894420	7454113	7815053	7743750	7966569	7324155	6924673	4733141	4452114	6715898	4498005	4800636	3164191	5736852	5817472	4260035	6063294	5836607	6459328	7134359	4034557	7769717	6942548	11611310	7725737	5329143	0.017	0.1434	1	0.793193	0.851378
Rab17	2379684	2853767	2352469	1265748	2030569	1812810	2240757	2336204	1915246	3084209	790103	1401249	1915528	2396638	910030	1946005	2980322	3046000	2225316	2490675	2686857	3420823	1481651	2287897	1449511	2339497	2607593	3323360	1568459	2489365	2100252	1522215	1433716	977628	1866500	3741171	1225050	1890209	-0.011	-0.1176	1	0.852816	0.797335
Rab18	90224240	120991600	153823300	134310800	88864070	88932190	109252900	154669800	105195600	127176600	64508090	74848270	129739600	173160600	79996490	97864120	135178000	108642100	100810000	89585670	101477200	156940500	140834900	69466420	83580480	132224600	140171800	116805100	76709990	101385200	169501500	122798600	113017200	71808510	108751500	158710400	134526600	113601200	0.009	0.1799	0.999548	0.781367	0.856487
Thbs1	51513520	54153720	25643460	14437310	20112360	24470950	40954430	21589560	11641390	19591790	26118280	47968790	16410230	22454630	21047000	25234110	10639990	11459230	11310360	36239500	35578880	16626850	14346450	22982650	24833890	18042260	12246530	7875885	21675780	40276970	17399040	12522530	13937440	13292540	8671755	24514490	13935290	13225910	-0.254	-1.4843	0.202828	0.847584	0.092053
Pdha1	1133898000	757447600	565233400	491077100	224851300	825277900	493666600	565243300	376182400	324652900	663065000	566661300	306085500	332359700	445361000	422411100	274766600	398365500	188441300	1045870000	593818900	511932000	346116800	1103524000	573304900	502831700	649069400	366144900	1359840000	402985500	376287300	332762100	213167500	566922700	396535300	387975400	388815500	206078400	0.02	0.1379	1	0.794887	0.850565
Hal	897933600	687829100	687436500	504408800	167090900	451029900	753613400	409205400	383813100	868575300	226190800	238461600	390295400	476060200	110284600	263680900	283945300	303414000	85324950	789072100	633138000	434341900	190986200	621286700	494532400	493719700	555840600	682141900	108766800	233337100	664613100	424344800	272487500	182007700	138072800	200371100	233872700	388129700	-0.071	-0.3817	1	0.883753	0.694935
Fah	817005100	982514900	1404032000	1031893000	902569300	647834900	974611500	1153910000	882899800	1346539000	415314200	652164000	916244400	1690228000	351066300	791147100	730019800	945520200	727600000	758351300	868874800	938070900	1050225000	716680700	818580000	847479500	1191632000	1283034000	374511700	794461900	1290879000	1143495000	1232173000	391756900	558987600	667866800	1004902000	1347468000	-0.005	-0.0511	1	0.841105	0.814572
Canx	329286800	669808500	849366800	703199100	688415400	404833900	590217800	965549600	632862800	782384500	246616500	502924500	921699000	1146708000	431202000	637679700	893523700	595660300	837090500	330976600	655245900	947565500	714857400	326124100	567751100	814271900	958927500	774767900	238767600	654936700	1029003000	824044700	840621700	186412700	471330500	1286038000	1057134000	900751700	-0.024	-0.1963	1	0.864338	0.77302
G6pc	5496860	28469450	17179050	18566120	17903340	14416040	16000250	10461210	27815680	31637050	5527375	12665240	17353840	57349760	16015310	19235830	29295000	32597630	25205070	8418113	16646450	30420760	27399870	6942601	16289240	22872220	39487170	35618120	7402868	27543200	31608960	42984490	44517470	7447896	18111670	41377620	42195730	60057310	0.212	1.1927	0.412637	0.197439	0.859278
Ap1m1	14599520	14028070	24360130	27022050	16170750	12907790	15585060	23664030	17132170	23187930	5855903	11893670	30238840	31693130	7717632	12455760	34795260	25457910	24802170	11600000	12235040	31890030	25193890	7649334	11777550	21456890	25372940	20913510	8817160	13251520	39816220	29990920	20966600	7007274	9456334	40611030	29552930	28859740	0.005	0.0375	1	0.822115	0.833565
Prdx1	3251252000	6226060000	10888290000	6720700000	6578656000	3073996000	5674682000	10584180000	8054654000	7266388000	1793743000	4070446000	10284340000	13383330000	2450860000	5282301000	6618256000	8087495000	5821382000	2796417000	4452779000	7133473000	8644406000	2985870000	4735953000	7655425000	10227970000	8591947000	2203422000	7246645000	13222490000	9614619000	6905199000	1949784000	3964256000	9144454000	9443022000	9134941000	-0.029	-0.1531	1	0.858302	0.78693
H2-DMb1	1609019	1769754	4478362	5946919	4107430	5657822	2578640	4455268	3252012	2559609	2155287	2842341	5795948	4462072	2746535	3462354	4485439	2220649	12597040	3624403	4108035	13522290	7717700	4152325	1729535	2481359	5626334	2944059	919796	3399455	4674939	2219752	3929972	2330621	2215277	23307880	4926195	2443763	0.023	0.1232	1	0.799304	0.848338
Cd81	12509450	14610760	11977030	7659629	4327862	8723543	9069113	7785959	5744126	5673355	6633745	10136740	6804565	17035340	10956430	11928920	6570484	13063520	8454033	13060150	7264290	9059619	6353832	14126290	7056749	7234474	5738818	3660573	7330471	18186690	6098654	7823424	4895262	6963809	10516990	12280250	10153680	5781888	-0.11	-0.7577	0.791456	0.892618	0.457078
Ptpn1	10940850	15140430	22779260	34433870	18836350	14541350	8801162	25664780	16412480	16586700	9425020	9094990	23528670	19665180	13741330	10558630	23430630	15676830	29355470	9910361	13338170	48601670	28709610	15664920	12758770	18855740	24022970	13585440	13997550	12777290	24772480	17050010	11660350	9633999	11900800	41038200	36947530	15040670	0.056	0.487	0.935642	0.642136	0.880645
Ptprk	1766925	3066755	2049855	1730034	1187626	1733246	1776613	2876082	2164077	2223821	1446930	1836655	2112562	2874071	756660	1645721	1194556	1593636	2683278	1816121	1461959	1782762	1027958	3496983	1767620	2504399	2802912	1354466	3542301	3505071	1379429	1477826	909985	2109684	2442457	3309199	1727461	2446161	0.083	0.6151	0.879723	0.564507	0.882407
Kdr	60108	81713.9	14437.3	26436.8	116362	156410	187198	192875	94111.4	2212.19	33393.2	34569.6	103964	113501	15223.4	88973.4	187942	45331.3	115937	52222.5	268106	36315.9	36744.8	21711.9	76619.4	41023.2	19811.8	47391.3	104735	188202	45110.1	60914.9	43979.5	53391.5	21554.7	165182	121130	124296	-0.081	-0.2773	1	0.873989	0.742836
Ldlr	22537480	16852060	18184200	14534860	5503068	15882280	22918390	18050860	17541330	38580140	7695801	5791368	12399640	21908180	4273245	3932398	6585015	8458295	6242460	12327990	10647120	11682230	14763590	36531570	22834380	17617840	22626360	27489930	3672537	7560899	17706710	13083270	12832270	5784225	4707735	9489158	4765727	12998480	0.008	0.0458	1	0.820111	0.835139
Rpl12	74680890	434764600	484446200	358715700	291146300	136580700	317526900	502479600	308480200	411526700	56141840	221514300	293050700	522820200	77728400	210135000	212705500	241271200	182462700	114753700	335720700	375185000	389082900	120855300	285945700	442958700	489991300	450275800	68380060	317236300	317600800	279271000	360704700	29194920	118924600	199264000	272833000	279677300	-0.053	-0.2796	1	0.874234	0.741895
Rpl18	131908200	873790300	1310749000	795839500	1172814000	333279100	757347800	1260235000	962670300	917136200	256615900	762155900	1700839000	2340936000	584542600	1102299000	1854124000	1322681000	1555724000	234553100	821187000	1164486000	1125657000	291356800	685051000	1024908000	1178719000	1043008000	256667800	1239015000	2135053000	1684925000	1419819000	289518700	1006735000	2302046000	1810189000	1726537000	0.034	0.1633	1	0.786873	0.854223
Tap2	12238740	28168350	53228740	95184070	80890310	11772340	17173620	66339410	24599450	27463780	17991080	19134470	82305550	50233400	24497840	23035050	92019240	44113140	137010000	12323730	24768430	163996000	103184300	10725040	20578000	31916970	44172750	38881600	9680771	26259000	73106660	47386110	38244390	10806690	22207340	161633900	141352000	40250880	-0.031	-0.129	1	0.854632	0.79409
Tbxas1	437450	1089911	1118776	936111	783724	1176593	499521	1134683	521550	727002	1541050	694490	1139927	576188	606062	1247442	1571241	1703091	2469861	1474555	844539	2575302	1363315	2791913	1868563	661818	841144	775591	247056	502330	974219	1122862	477545	916304	164161	5762476	2120238	671182	0.04	0.1895	0.999024	0.778089	0.857748
Cpox	555033200	368376400	396067100	304880000	131175100	412224900	237529300	377146800	241970500	212898100	195243200	259888100	295535500	212091800	176157100	221653500	212274900	281034800	146409200	474738600	332511500	306475600	258929400	517891900	256468300	292134500	432257200	220236700	269651200	199236000	352579000	236157300	157294100	180319800	234715400	370719200	281848100	160156300	0.04	0.4421	0.950916	0.666825	0.879027
Ppm1b	5011964	4285777	1950241	3067445	1478198	2853633	5359027	4451532	2813571	4756182	769747	992354	2142429	2535723	338218	1075596	844408	1060657	513705	3149395	3853467	3704990	2601170	4686127	2993778	2940266	3818271	4443680	937132	1344631	2368535	2146933	1880880	844490	519128	797779	1394997	1402450	0.085	0.4214	0.957303	0.677726	0.878084
Por	1304214000	2236998000	3112954000	2517224000	2029777000	1577189000	2397912000	2795293000	2611604000	3172425000	1126740000	1668654000	3407990000	4842781000	1754768000	2427187000	3932981000	2753355000	2741482000	1450250000	2369802000	2599902000	2548297000	1269024000	2083234000	2872768000	3843191000	2956686000	909914500	2177860000	4074014000	3847489000	3864645000	871622800	1902829000	3702709000	3407571000	3651356000	-0.027	-0.2102	1	0.866142	0.768235
Hmgcl	1064548000	801205200	609255700	528939300	190865500	944163300	589606400	403768600	471443300	299014800	614470100	463134000	332198400	388515100	604905800	403175800	286425800	375103400	198345100	1029706000	586996800	374091700	274236700	979716200	572260900	504957400	544068900	381825800	767968800	447752700	603879900	326996100	260310200	597692500	471673200	439492000	363688800	250400300	0.026	0.2046	0.998026	0.772792	0.859662
Hspa9	4625414000	2785465000	2971135000	2173106000	1097941000	3384312000	2095277000	2427331000	1745970000	1273717000	2694718000	2843271000	2163308000	1806666000	2876290000	2540134000	1643775000	2100833000	1141147000	3850904000	2385329000	2342787000	1506771000	4512696000	2483005000	2002268000	2614777000	1371921000	4380372000	2155654000	2497639000	1725169000	987585100	3738116000	2841542000	2146849000	2162614000	1047647000	-0.006	-0.053	1	0.841468	0.814117
Mbl1	2077081	2877481	3712842	3021842	4491658	2237060	3512510	5587397	5795471	6358752	674049	1317132	4369501	6579479	1031280	1704605	3527234	4190366	6161172	6692336	3372069	4878237	3074212	2229576	3118218	7662783	6192572	5281947	642600	1672501	4654994	4206653	4133412	810788	1939544	7317958	5306209	6878238	0.106	0.6368	0.868048	0.550456	0.882332
Dnm1	572156	2469072	4724636	3367362	1900961	401834	1859599	3567985	2080760	2975431	603355	2034427	4810323	2847561	1306864	2067872	2614513	2085719	1518759	1190124	2322771	2637136	2658837	1722360	2575033	3578920	1524719	2034496	382460	1513072	3471177	2927189	2329224	275404	1861731	2541161	2858164	2681364	-0.047	-0.2467	1	0.87058	0.754905
Dnm2	15763990	20293960	33783390	27337390	15257110	14627470	16980220	22611040	23559500	27937130	7124316	18660840	32870810	31647060	11950570	17179670	22745000	20195650	14400980	14874290	17087890	23651250	22007360	15005830	23108030	22271760	21348630	22587860	10952570	15039720	37052590	23051950	18753110	8227384	18518740	28933280	26115090	21504630	0.009	0.1336	1	0.796195	0.849922
Col18a1	2354572	1504027	2099618	2541549	1241278	2307405	2927082	3303119	2625251	3222115	767860	488074	1590408	1701316	1050897	1635700	2427696	2890385	3133917	2069194	1035312	3496952	1716484	2244605	2475565	4006279	3694238	1909900	1351715	1197923	2049331	2076105	1248791	942610	1316443	4231185	3730789	1712425	0.04	0.3467	0.9769	0.714467	0.873566
Man1a2	7036131	6275550	7654290	6990038	11230890	4001822	5369693	10424610	11341180	9055084	1997685	3054674	13292950	15747820	4581618	5412655	18087880	11342310	16423240	2620715	6594515	11729780	10471040	3858336	4316074	8938848	13705220	7098237	2281889	6500251	14169590	9898116	12382360	2514917	7368057	24923790	20999340	10843620	0.003	0.0165	1	0.827004	0.829433
Tjp1	2934451	3233257	2072124	1972815	1956308	1720057	2424257	3161462	2143024	1792702	672667	1800171	2338552	3097948	1078841	1999829	2242704	1456937	1076746	2115173	2123324	2281874	1155374	1429690	2745787	2457483	1359644	1649153	2125781	2487070	2246304	2356395	749523	1183288	2588199	1705056	1806533	2551858	-0.048	-0.4207	1	0.886756	0.674165
Timp3	2226577	2183376	532642	388008	240574	1173115	1450746	812088	804753	1906747	44192.3	383356	95659.9	557070	145162	293938	88250.5	98911.9	345571	1285437	308799	361207	411936	2023776	1212714	1420754	812767	1159689	387999	408161	84001.9	264542	14551.4	174211	121125	256922	274254	271236	-0.147	-0.4336	0.997925	0.887676	0.666944
Cap1	28935440	21854620	24133850	20646550	11166970	17530890	12841810	26043590	9791280	16776410	10528690	11263140	12330310	17798560	5141593	7987739	5132264	10681230	9458691	14941940	13070110	21730660	13159380	16247240	13838380	19935050	14279160	13630300	7370565	10601110	13949690	10833070	8803105	4243108	5689580	11768850	11115910	8440158	-0.137	-1.2283	0.360498	0.861889	0.186721
Tkt	120580400	133792100	134759800	113379100	90823270	84925950	112912000	130482100	77140820	143848600	55682840	88097280	86293660	148613400	40258130	83144710	47016910	59548180	64537420	101683300	114114200	114976700	111796800	102598200	107030500	88394150	118950200	133858800	60508650	81806520	115979300	80492870	98866570	39648830	55362970	71945190	88972630	99648070	0	-0.0008	1	0.830844	0.825864
Cd82	18050160	21733190	35562830	17100610	17715930	13691750	20642920	25603700	21774150	25823320	13024170	26112890	29362340	54379180	21377620	26652110	28043800	35169130	23878280	15714310	22188670	20295390	17161140	15589630	22639230	19913080	22548040	16564420	12660100	25009540	35319780	27352760	26246890	17269390	21395800	45865700	39417910	38709380	-0.038	-0.3942	1	0.884751	0.688455
Vps26a	8293410	8880174	21253440	12414520	11971490	8017499	6979087	14529730	12306040	18364010	3180339	6176357	18863630	17172750	10083710	10013360	27876460	12834750	16545500	7834762	8205885	18695250	16415920	8390228	10029220	17381070	15726980	8214584	7022640	8923982	32495850	15170360	18085580	10718900	7709155	34190990	20286370	18529990	0.123	0.988	0.589483	0.315162	0.870318
Tfam	29746210	17125130	16687660	11409600	8459363	23377280	10675280	19254050	8292299	10201670	3739980	9776155	8809506	12493450	1811913	8772644	5760623	9769878	4292035	29449540	18362840	18423000	11656770	30426970	15977430	14762730	20296300	9531961	13497070	6466552	8393812	7111756	6990031	1444836	3697874	9152128	5394684	3268310	-0.014	-0.0738	1	0.845327	0.809
Inmt	839481700	729210700	429587700	462071400	231854400	577250100	611275200	451297400	355970100	650166400	202924700	269541700	272115000	511296200	166911200	298125800	243855600	262390000	164611900	587533300	476232700	565979800	249358300	573457300	531375900	508777300	474879400	592423900	152750600	297880400	328253000	319066000	240275100	238795400	176878800	242432600	270105100	348708400	-0.05	-0.3976	1	0.885016	0.686664
Rpl28	5958507	16565420	21675920	15778810	37357000	6914090	11414730	25755450	15804090	30343000	4756752	15050130	27312430	65630870	4801590	14566890	34735180	24338210	35470990	4588520	21726980	30786780	32608970	3759338	16300330	27941700	35188100	34339820	1403899	21781820	26436130	35953980	40326350	2277396	9886581	29642790	42754090	45758670	-0.005	-0.0194	1	0.83479	0.821851
Acsl1	7796130000	7229130000	9658232000	5857414000	4914547000	8074594000	7235403000	6685110000	6346748000	6458888000	6486904000	6561300000	7861250000	10985890000	10419920000	9319278000	8083039000	6440491000	5471648000	7496061000	6369604000	6378352000	6211271000	6385780000	6510007000	6959835000	8258943000	6627156000	6094069000	7029521000	9301839000	8282717000	7431551000	8215225000	7749414000	8658978000	6598564000	8077893000	-0.057	-0.9386	0.611456	0.882842	0.340014
Abca1	15638940	17755520	22190940	16160090	14912900	17948170	15204030	16328330	12087860	18650330	9014007	14583290	19842070	21826140	14217510	16474420	16940350	15087470	15930030	8085781	13635340	16035830	16613090	11117920	15448220	17720600	16705040	10485080	8288749	13413890	22336780	14381840	10313610	9584359	12865160	31061080	27244500	18202370	-0.13	-1.7663	0.082699	0.837966	0.033519
Csk	9264453	4399014	6148508	7968153	5173020	5303093	5543730	8797423	4371603	7780900	2560143	4104049	6712514	4643687	2980911	4095866	6747125	6670753	5985180	7456700	3820695	7489817	6742844	6395940	6527184	7914486	8172339	4117377	2006687	2414938	11316050	4627812	6213576	3187760	3013437	8556033	4928624	7670351	-0.023	-0.2249	1	0.86798	0.763001
Mmp9	385222	1085754	1087223	601905	385052	385175	914361	534336	281608	870770	457127	428519	296281	187088	426203	981834	76653.9	949839	261634	344289	297689	1866502	412897	381258	488187	46976.9	272953	367133	458643	1755838	1020830	738381	601772	299403	212674	294267	1410625	330130	-0.038	-0.1471	1	0.85741	0.788752
Mbl2	83913610	128393600	211836200	203134700	208606700	117915900	140552200	299078500	206126900	193885900	53319820	93871390	266945200	334542500	106918200	140275600	216145100	162521500	256863400	80621920	133349800	239854900	190265800	89828760	153128700	204539700	267868300	218615400	36712590	114092600	209775800	219248500	223231200	34582470	106193300	390037500	284852100	232032100	-0.082	-0.5905	0.928658	0.894433	0.569799
Eci1	2015847000	1239685000	1276879000	828215300	421411400	1840191000	954079800	827562700	866691000	508263600	1283815000	1128446000	903416000	896922600	1658783000	1202755000	850195300	1031399000	468658500	1875187000	1204844000	865034900	605218000	1984566000	1016887000	777686000	1182075000	671204300	1736499000	1044479000	1153274000	928359600	493661200	1770794000	1241387000	1044530000	797871100	478135600	-0.002	-0.0186	1	0.834624	0.822027
Septin2	11747880	15514910	40891610	18960990	15993910	10289770	13110550	32254350	12436260	15890030	6773006	14832460	24583250	42610870	12018480	23908160	26611910	21522930	22028050	10359180	13416270	20077670	17773520	9905911	13907990	22117650	16426720	13931140	10590530	18729070	30968760	21941970	19699900	8963487	16118830	45057110	34743420	21212810	-0.036	-0.3165	1	0.877975	0.726111
Stat1	21444500	26907060	32061610	130450000	46143610	15034180	13867730	37997110	13268180	20396200	11077400	13416990	34916850	17405310	11416830	9994248	25241870	17951740	69351430	17779030	15451750	146512800	66066980	17253110	16212140	26809220	25553070	18110160	6482746	12787310	29140600	14621510	13195920	10107490	9319207	53569210	112475200	16739110	-0.042	-0.198	1	0.864562	0.772443
Stat3	7805954	7002152	5577750	7122235	2779080	5047201	4780464	6571531	4199583	7468376	1622927	3044679	3937859	6216722	2672939	4073701	4454627	4834987	3977650	4768878	4013509	11119600	3740962	5257675	4754558	6964260	5769098	4375469	2560280	2768366	5879431	4752100	1435759	2624329	2998381	6070028	9999352	4775229	-0.038	-0.4021	1	0.885364	0.684274
Stat5b	1087620	694945	711459	763567	501539	1308640	541891	1643015	720981	1108558	568841	944254	278386	1832457	381231	903300	458238	647670	448063	1416142	1526951	2354800	989737	673259	976073	846824	1251229	877149	1754845	681959	1502766	882564	722077	1695161	299357	2209724	2174810	1505770	0.426	2.8686	0.000134	2.6e-05	0.828954
Eps15	1469734	1741846	3275193	2026860	1871998	1833170	2242610	3182546	1906927	2202370	841926	1934264	3973695	4092822	2576170	2395680	4111667	3414459	2230984	1718922	1808133	3031989	2112495	2515638	2429515	2434583	3023419	2083520	1307588	2744855	3340444	2574895	2229020	2727533	2708488	5454715	4361942	5289689	0.123	1.0812	0.506487	0.258488	0.865266
Pura	12556200	20406310	29886580	11668400	15183630	18598070	18185230	27280510	12444840	19685530	8436517	10281910	26772830	40430580	15470220	24084870	40635740	22794250	17665740	19058490	12586600	14655800	17453860	14379960	10999570	21473860	17168510	18375160	8368010	25997800	37222620	31631080	29564290	7801156	9455399	40800260	24726040	38101800	-0.032	-0.2807	1	0.874351	0.741443
Lifr	885647	1387632	1041389	1474819	1026424	713627	1338344	1647889	1876548	1423031	874167	1588316	1266694	1755794	1379092	941284	1526698	600632	1369149	1636147	1700197	1100302	503059	697784	1098340	2514743	862942	1322129	1525699	731347	1584358	764590	1295421	2607140	2652300	1449333	2376715	1368556	0.047	0.2867	0.988488	0.740962	0.86858
Pxmp2	566204800	612379600	624635500	1204270000	785736700	1068427000	739692100	550780100	1029944000	1370707000	428988200	516581200	537205800	1195672000	678174900	701310100	683477800	1083717000	658252900	590379800	691642900	1213332000	1789416000	531542800	822316600	678787300	1086839000	1307161000	239010000	436124300	421761300	1094044000	1347542000	613118300	414552400	514550100	917244900	1066682000	-0.044	-0.2882	1	0.875139	0.738331
Cct8	254318700	226598500	492952700	311589400	176365700	262733600	221002700	404408300	263506700	371168800	186100200	179300700	287102100	303254800	236565300	217558000	192689400	206830600	164269200	273737400	198409600	274089200	268551500	257245000	256072700	307328700	297962200	298336700	176501300	154076500	370176600	215476900	214242200	235131700	205303400	210623300	289102600	288945200	-0.037	-0.5475	0.954299	0.893421	0.597818
Slc1a2	1301435	1673083	3141176	1120622	1817140	2449905	1200934	1695365	2095491	1641313	702197	2458986	2751258	2918665	1614822	1259343	1799059	2810054	1696151	656377	1695081	804617	1479029	1235743	1027985	1339847	1322853	753263	727212	1389247	2920934	1195174	1862833	2079463	1940326	2570022	3844825	2309362	-0.23	-1.6082	0.141642	0.842686	0.060786
Hist1h1e	15649760	14545360	22186380	27741900	11023080	13520390	10373570	35840080	6200546	18348030	8170060	11413060	25375500	23032240	2840220	12775220	11721910	14992110	5463520	59398320	19933520	89049150	14055710	18610610	16044500	22651190	27869240	20041660	22016370	8216470	30650050	17753610	13476800	1600573	8529751	24459750	17282570	26207100	0.322	1.7483	0.077458	0.028338	0.838455
Itgav	3934570	2924901	6350401	5554587	3209669	3225127	3635359	6375726	3827228	4389288	2752047	3079452	7450947	8194010	2963514	5331613	6703080	4867216	6324870	3304574	2543765	6556569	5363577	2808398	3714383	4345713	4237936	3786072	5493282	4607067	6785384	6508614	4718892	3513351	3761130	12209720	5951275	7050468	0.039	0.3742	0.970328	0.70142	0.875439
Plin2	858337	1416389	484123	1428812	315697	2147914	2693118	1581468	2305306	12247410	284619	947580	930667	988767	1227178	909041	780854	1076881	479228	717638	1225957	704383	509084	2246097	1295371	3795754	5826990	6896803	642693	871141	249867	437589	1608309	470027	355499	823869	1836463	2095295	-0.006	-0.0212	1	0.835162	0.821453
Akr1b1	7409268	6846931	5291420	6837473	1395467	3456968	5666744	4196587	2493685	6018227	3333095	2562156	4956463	1903237	1865197	1837825	1076801	1752477	1557165	5921573	3589695	4877879	2505596	3881906	4844520	4911968	1950799	3754842	8379356	2021300	5485640	1005890	1344006	2038765	1415915	2123842	1397473	2057777	-0.097	-0.4873	0.981777	0.89093	0.635451
Man1a1	13575050	56609730	77626900	62245360	89409090	30640320	54992990	100165300	72082770	54695280	17650750	40673370	114827300	150578500	49707580	74338030	148986600	92555260	119095200	12479870	59929790	73572810	67231130	15029690	38080470	83037330	95189080	30883430	16772930	72491600	130716700	82145300	90817680	16562330	67019910	176423100	144255400	94637290	-0.138	-0.666	0.872941	0.89469	0.519203
Fkbp2	104625600	209054800	156394900	156759000	50570800	97844880	162616400	139228200	123608300	173776900	19110330	62041620	85674920	81038150	32192220	76526850	48035880	69873140	66862400	90920450	176553700	105922000	74683680	113407000	153589800	197947800	178349600	157255400	25861940	65203800	96200680	106576500	81936230	14614180	49930040	65524020	76619500	111559400	-0.017	-0.0992	1	0.849771	0.802387
Acadm	3640300000	2113637000	2023085000	1435141000	467870800	2915436000	1590307000	1440240000	1340433000	864512700	1749459000	1328716000	947484300	798430200	1066364000	1008692000	614034500	953838900	329692000	3181655000	1837183000	1180960000	985189500	3503047000	1737693000	1233507000	1996561000	1197606000	3890000000	1159995000	1614958000	735033700	555488000	1132258000	1060887000	867666000	684329300	391473100	0.029	0.1636	1	0.786776	0.854265
Syt1	267796	447914	259107	129482	192469	188300	63620.7	187208	289116	141665	176325	307838	78472.6	254886	134093	121316	135374	139608	133971	503988	331367	175029	101281	400300	227800	119814	276495	203773	537506	130506	67427.3	34802.2	42312.5	117130	364654	349044	133734	292654	0.041	0.1933	0.998793	0.776772	0.858238
Gpx3	46888240	45468790	33707100	36632590	23916150	56330840	50168530	39715050	41159940	34995450	24438760	27287700	21935250	37656710	34271050	42981420	29096640	20930920	20358820	37037950	34560150	36579250	23241200	46002330	49842020	39976980	62606090	23170730	66276730	36942180	42861060	28673640	25189100	29927040	24823670	48685100	17629510	26836050	0.019	0.1637	1	0.786743	0.854279
Nsf	57035970	70654560	80666010	78387460	44773990	63740110	84045190	72412760	66341820	85433510	19494440	49592060	69427000	84300170	40263220	49668400	48798930	46663960	35782750	49928830	62984880	82165510	74747990	56274160	73783460	86788990	89867330	67173580	42208050	56492870	89305880	50197510	59826040	19887560	34528250	58663670	61359170	51072950	0.008	0.0982	1	0.806462	0.844353
Vps4b	8076208	6719320	3560080	222231000	4678559	290213800	186143900	218893000	182675200	259236600	1950172	6520380	68906880	7392326	31753000	3083668	1942408	124736600	2591410	204862900	264477700	5939441	233762800	275612000	133123300	250206900	194403000	190209000	113760900	7168050	39729360	108693900	124547200	59985280	56014330	48444350	2376104	4689318	1.011	1.7254	0.085632	0.031255	0.839014
Psmc2	30120940	24936850	14110990	20864960	6751378	14000910	24263420	16455150	11771330	26507570	5724840	5823971	12302110	11128090	2448531	5059585	7944479	6080888	4457621	23024380	16552040	17337160	10166300	21097810	13346010	18802240	21037230	19574510	3800195	4281182	16643890	9016244	8013820	2227980	2954898	8796255	9683269	9682036	-0.04	-0.2135	1	0.86656	0.767075
Rab11b	178899900	198412200	282840100	229174600	202244100	177286800	190809300	282129800	187706600	190965700	139799300	176283300	293437700	360187800	170605800	212429200	300745400	268164900	225422300	176731700	177999800	326028200	225853800	132744400	154061700	222072900	232942900	192348200	234163000	209288500	386160800	259853800	221338800	131607300	172374500	351185800	290188900	243644700	-0.029	-0.4522	0.993194	0.88891	0.656287
Fdx1	366255900	194675100	81572250	82085710	41583390	226743300	111724400	71075250	102676200	62293350	274035700	121794700	91809930	89240890	207691700	88590710	89732250	78506400	41961400	248726700	149805100	114851300	62445310	269804000	125882700	83169090	132378500	70704380	272430100	78498040	123802800	85007210	46821410	114405700	79437200	109285300	99600700	51448800	-0.029	-0.1552	1	0.858611	0.786287
Myo1b	104974500	111360000	167280700	121103200	108216200	104416300	88932190	119094700	116281000	164951700	89704280	143239000	146330100	181514800	95499050	155190000	145625200	151450700	118945500	110787500	84433930	109843700	112877300	67273520	114199700	106455300	124801300	102581800	93658690	103463400	167151800	127040400	123059600	97571430	134879700	223838900	176390500	168927100	-0.078	-1.129	0.436252	0.86892	0.233839
Brcc3	0	19989.7	37988.7	100322	66603.1	144826	133160	121289	160989	113055	67100.8	172371	100241	97667.6	164712	59728.2	65499.7	119511	37905.5	46738.4	26535.5	53158.9	56054.3	74983.2	76885	86524.2	191256	21331.1	53533.8	105668	65244.2	100125	90680.8	10562.3	110094	109125	106340	135139	-0.229	-0.937	0.613053	0.882951	0.34099
Nedd4	7218771	5206142	4218123	4216803	2315387	5611171	4059467	5468255	4874854	6334732	1973229	1509524	3608679	1781678	2450133	2123947	2879229	3010765	2196755	5036849	4739730	6939477	4062704	4747344	4117061	5655264	5079272	5597627	2421738	2646369	3071921	4114716	3540018	2140654	2050022	3690180	1807857	2926009	0.065	0.5582	0.907085	0.600206	0.88211
Stt3a	416624900	1233494000	1270114000	1194016000	1286911000	708703900	1057168000	1205632000	1065334000	1131759000	528730300	1318028000	1598970000	2421257000	1230677000	1410627000	1955517000	1398475000	1475676000	479860700	1066994000	1447879000	1130504000	517337200	941271300	1079406000	1471331000	1158182000	481481900	1429467000	2080075000	1952437000	1422013000	487049900	1047344000	2455342000	2027488000	1963193000	-0.03	-0.2264	1	0.868163	0.762457
Cryz	130167000	148746700	146376100	98926400	38593190	103335300	127598700	142311900	79227200	94849710	29489920	63757540	46924650	86720600	18947450	42113760	34644420	42088330	15915080	122966400	128750200	85758870	78973080	132840700	109454900	146861600	136737300	101711900	105796000	63691280	47102530	53167300	72118240	22081420	15301140	26615150	33943750	37553820	0.023	0.1123	1	0.802479	0.846631
Aldh2	33748500000	25162900000	23464690000	19145440000	10525470000	30914140000	17706380000	20227520000	16586120000	12229560000	27761770000	24828140000	20969290000	18641550000	32530300000	25183960000	20695550000	24146460000	13594660000	28541120000	19290490000	20355800000	14265950000	37154640000	21383230000	16665670000	23131430000	12880650000	29995070000	22137960000	27030930000	20540210000	10679620000	35904440000	28348610000	29240150000	24079530000	13860010000	-0.059	-0.9436	0.606474	0.8825	0.33697
Aldh3a2	1696002000	1839731000	3117099000	1942801000	1667508000	1986938000	1676209000	2215542000	1895132000	1758039000	1522891000	1463009000	2503871000	4102743000	2305258000	2274625000	2643395000	2964754000	2498237000	1503109000	1732089000	2123299000	2764096000	1547041000	1525923000	1722951000	2510671000	2120619000	1191059000	1961508000	2726120000	3302165000	2646235000	2137004000	2154788000	3235199000	2394492000	2967692000	-0.026	-0.298	1	0.876145	0.734186
Capza1	1998971	1479213	2302182	2730856	1988839	1581696	1209989	3997303	815942	2781107	1387797	1778371	4574339	1909630	1674981	2602021	3753931	5003370	3901827	1821687	1383213	2709597	2294309	1535734	1823288	1816245	1289791	2064811	1563696	826237	3562325	2373398	1630869	1468871	2289782	5483743	4558476	3621464	-0.086	-0.6302	0.900911	0.894804	0.543351
Capza2	14685310	17028050	24223760	18305110	13303510	11182850	11282610	18890390	15168080	25685610	12186600	13292660	25320200	21827410	10482250	14689450	25333220	23417840	29015900	14556290	11877320	24598830	16292850	9027993	16850550	17161480	18197860	18054550	10390990	10899700	26303580	17549400	17358910	9739686	10184030	32352990	30202800	27015940	-0.046	-0.4898	0.980836	0.891058	0.633933
Capzb	31065790	24209380	38644370	30845110	15447780	18774820	16829390	32314400	22364430	33312840	19958350	19782940	35822930	26792980	15532360	19113030	21283470	30078970	21466220	25149230	14505310	33185470	26696890	17068730	26458630	29893540	32281630	25458080	17418670	13633060	40107070	21581430	18937360	10598180	13436800	36837070	27759510	20702730	-0.06	-0.8871	0.663254	0.886193	0.372064
Gsr	114437200	80356710	90291030	83221790	49332960	101505800	69331940	98296910	54211240	46464870	64842550	86101630	68697170	66330600	57348180	75316260	46347730	68091240	48823900	105183600	59013360	89963390	59912610	122998600	72199450	72626470	85812930	44311680	143725800	65796380	67677950	64003800	37068540	77452380	42705860	60210030	73059560	51460270	-0.011	-0.093	1	0.848713	0.804039
Mtx1	147150800	113711200	108525300	87977420	61363550	110936500	70997420	108828600	72281140	50997640	87269530	126472300	104649800	129380500	144584600	121395500	97387130	134024400	84163390	140089400	89340300	112199700	77464540	142094200	78718040	82371820	107235400	46971140	125049000	93094100	118456200	136070900	54233930	141520300	104253400	137457500	157836000	71289560	-0.022	-0.2117	1	0.866333	0.767709
Pfkm	197400	480600	551760	224459	289230	127663	544833	346629	179243	296774	202438	189808	745294	368079	233778	519193	585648	193661	337269	14456	250689	329364	128883	463775	128877	339196	357106	300299	191195	253351	976686	603798	217793	247108	307958	582155	335762	389217	-0.159	-0.6885	0.854119	0.89441	0.50395
Igfbp2	711550	1650633	1554348	1084532	1030625	642782	1553633	2427600	804258	640768	250605	330156	387639	1340750	79140.3	310137	320938	319760	407439	483206	1453583	777658	280530	347425	762875	3440972	888943	1087927	193023	351260	444481	296061	1229601	262886	129421	345348	726279	653336	-0.158	-0.72	0.826391	0.893761	0.482576
Rpl6	217376000	1167275000	1572983000	1151412000	1604354000	442279300	1104744000	1666655000	1375124000	1459332000	265074800	1015925000	2043233000	2983242000	559870900	1278279000	2372796000	1788186000	2070901000	318690700	1128416000	1623111000	1618136000	381327300	1043061000	1486131000	1905016000	1693338000	311585300	1488777000	2429218000	2423033000	2074132000	317880600	1218755000	2919947000	2311599000	2296598000	0.062	0.2792	0.989662	0.744083	0.867868
Crat	301446300	323571800	488199900	407540100	340171700	354910200	374847400	340188200	349074600	327246800	313211800	279078500	360230600	619746900	447444000	534294100	368807800	469874400	476736000	298154600	289650300	430938800	557957500	271058200	310426400	330894500	424997600	375451200	423045100	391369900	429692500	553487500	445592800	461128700	439606900	465927900	411431800	530606400	0.007	0.0756	1	0.812566	0.840527
Rpl5	28946910	208911600	270649600	188306800	287027800	45728980	150424200	384120900	192487200	248617500	21058900	139916900	258328500	498391700	38486340	176372300	312594800	301511800	312151700	50154920	176046100	216675900	260879000	53878650	134875600	307561000	274330100	299374900	34824460	187147600	295609500	353429400	276741200	24962710	175274600	364301900	358189200	360390400	0.056	0.206	0.997922	0.772292	0.859835
Rpl13	97241810	568195200	666336000	477722100	627934700	210100400	559216000	849374200	507058500	834141700	93568040	415977700	860049800	1284449000	202328000	487847300	721866000	542564400	620587200	206970900	691867700	798863300	763543000	214168300	587323000	784473000	1102732000	969288500	91518070	523397900	873178400	739013500	803783300	91605530	282728900	885888600	805624600	884058000	0.062	0.3012	0.986044	0.734808	0.869901
Rpl36	12610870	209696600	226521400	131187400	207574500	59963810	152060800	273953800	165099500	209243500	35204100	117865900	165859700	411798800	48919950	139419400	136884300	164089700	127253500	55591750	168479900	224059700	235340400	59135940	150974200	239080900	279673600	236074300	23721180	180008800	190951000	198500200	208376900	23282300	93016750	157709200	161810000	176606400	0.007	0.0316	1	0.823515	0.832426
Anxa5	201430300	232304400	324541000	259525400	195538900	147163400	190725100	347580000	152531000	232593800	171081800	240848700	417257600	360945600	156250700	217484400	237390600	254233300	287270500	159989000	171805800	281321200	261226400	146629600	168816900	209676300	195588200	200778500	130075900	202415600	336291000	225729400	190092100	168811800	148318700	422151400	273052900	255692900	-0.148	-1.9464	0.041526	0.834299	0.015505
Epb41	31108630	34855370	30634400	21597430	19046400	20219390	33191190	29243520	23024480	24381030	12743840	30903070	17260820	36273060	15836400	16265720	13698270	24678770	16159430	30125300	33939870	22502590	15857610	16955050	21250970	22917490	15166150	19053340	26656710	25233170	29127740	22854490	20947410	7621476	11626570	14609480	22368680	22652930	-0.134	-1.3857	0.258678	0.852381	0.123788
Abcd1	202598300	190891900	281782500	266876600	181671900	252834800	156701100	204454900	204850800	248261200	211002400	151402400	234394000	323628600	269839000	205724000	202882400	298770000	156890500	171645500	164989700	271844400	529673900	215831600	184106000	169188100	292065200	196285700	165879000	191736700	221077900	276182700	256932300	305263200	302417600	221974900	252876400	214843300	0.02	0.2089	0.997702	0.771252	0.860191
Lmna	6206690	6973190	10032820	15555330	1353242	5770777	4419390	13439620	5381391	7222204	2171453	3450771	5367153	5464948	2877522	5184164	2790316	4347894	1848417	14239500	3406120	29525560	3053986	5306868	5624920	8792392	7841277	6188691	5390267	3060388	7346997	4214669	2376323	2168992	3273197	11097940	6485152	5689524	0.147	0.88	0.687277	0.385789	0.875671
Cbr1	251706900	266408200	145617900	176457500	61097730	187415000	242506700	180690400	145658800	241194400	32241890	75919600	51202080	64587610	20168500	41583020	23295340	30092110	37464700	245796900	159439100	180486600	122005700	259445600	173323400	175183500	181520400	226014100	99944900	60257050	44646940	46269690	56001720	24726720	28151960	34858160	46451760	39397530	0	0	1	0.83067	0.826032
Gstm5	896187	1967219	1021934	1516973	487115	1168299	624650	1297202	1334223	1167240	228052	449539	1436880	2282172	289493	598258	1123147	734873	953140	988449	800943	1642928	952807	651803	1017550	1247924	1233994	1489478	449076	745880	1518319	1855764	888830	1474185	141757	837994	1838273	1122825	0.077	0.535	0.917024	0.614225	0.881773
Tdo2	72457940	49590160	65498700	86432010	28677980	70118150	85034280	63702260	81440160	129271500	12632950	26935940	54426070	58496570	22742500	34149350	47444890	46711270	48805890	51100660	45917500	88793940	58869690	68968180	76164570	76746720	85714060	100742800	11057560	25590800	81636220	49694480	31022260	16712280	29874350	58169540	84580900	76261970	0.009	0.0596	1	0.816686	0.837684
Slc25a4	353977700	203025400	143790200	128061100	70718740	104428900	222569400	89151090	109815800	84588520	90470150	86507860	139139900	103533400	85982690	267507400	75322300	94053580	116148800	205277200	80053160	202887300	100953100	82572750	132644200	96286380	96057140	69635110	401048700	71779890	170724600	114917100	106076100	56905860	232113200	138524400	668017900	88802330	0.053	0.3062	0.985147	0.732649	0.870339
Serpind1	19663080	24158000	22872390	29053670	24215600	23304680	27703030	25518750	28190100	39798560	9149757	13918480	28932770	42037990	12681920	17997310	29337430	18360560	22416600	18278940	22615560	24212010	22788070	19427350	27676640	23394870	35946720	24217570	8182592	19751230	36507470	29073970	24589240	6717793	13646200	38840760	26947040	19227130	-0.069	-0.8541	0.696575	0.888141	0.393217
Epb42	5423506	18738020	24568810	12311730	13989510	6293089	26203300	22569590	10759820	7331936	7139805	29628110	13777980	23114670	9659621	11687710	21829640	22105170	17109330	6666616	21018430	17560150	4837180	6862224	6737161	20711140	12213630	7856392	11249890	46322750	26069000	23529570	10691300	5945437	9571246	14408090	18399790	12007630	-0.144	-0.8172	0.733536	0.89009	0.41735
Epx	4296278	11167060	18994270	5785476	11891790	8007109	4790431	5578907	3397365	5798628	10927150	3142497	2729918	12994900	10531670	6726266	10656900	7779166	30483480	6238925	5815351	8840095	18746390	8001441	5395117	4257837	6095019	6084488	6306556	5467775	9820533	10187040	7967925	6529966	4522850	27191370	25208190	6622857	0.039	0.2083	0.997748	0.771467	0.860117
Hpd	1751269000	1565240000	2134964000	1179299000	442715600	1224555000	1488476000	1221802000	863605800	1474361000	631302700	851673300	766023400	1032306000	338921300	887775600	436566000	627135500	266065600	1369736000	1158399000	950612500	734723900	1407805000	1372530000	1146328000	1431160000	1209228000	461018400	675292000	1238741000	813008700	726088500	556903600	549177500	504114200	617413300	683162700	-0.025	-0.1936	1	0.86398	0.773932
Ppm1a	79330080	74504070	81185630	53169050	10722970	61078680	91091810	35391670	67789350	52236230	25749600	7593561	11328020	17378380	12533190	8206066	7994609	8395988	3650491	69324630	71658550	19440020	32627600	74428280	64442540	70025670	57691550	87501720	23473650	24095160	25335690	11564760	26759580	16045170	11194210	8534435	3968127	11657040	0.078	0.2615	0.992188	0.751278	0.866106
Pcyt1a	2839269	9735420	14177770	11139210	8276218	3450843	6831282	14308460	13536950	15801790	2594012	6227605	12908720	21935740	3251802	3306029	9222011	7644489	12589070	2887942	7525666	16694050	10896000	3245749	6746073	12749830	18957460	15961140	3233431	7867450	15650240	9858604	16149990	2439812	4310619	10730390	12689060	11936630	0.061	0.3616	0.973434	0.707468	0.874612
Cdk5	1081758	1088964	1315594	936881	417483	2454913	492362	889787	2078361	1325876	888386	1049149	1502185	1389509	1982826	336364	1923824	1394920	558778	697519	1189605	787456	1311542	512133	1080749	785770	1510937	1974848	1177844	1418735	1045867	1837886	1548159	3004837	1613790	1922625	2514641	2308888	0.212	1.1053	0.48566	0.244624	0.86395
Hcls1	653198	472943	417986	1010098	339693	302166	412555	938908	438644	153017	492873	985780	593980	341357	269160	447325	384759	722542	577874	439753	494058	120599	621846	559397	513853	907579	296575	446347	308621	263067	470250	260996	137709	190967	246225	394112	532401	202385	-0.341	-2.0872	0.023238	0.832433	0.007807
Psma2	21356110	53740220	99904630	27157560	45117060	34435540	27901510	88419680	46331150	62564580	14261910	42398480	61750960	47204570	38598150	42198230	57870450	66163230	15555710	31664920	53293300	61374800	40584330	35830240	58373060	74943820	70403810	24761880	4836139	28154960	75473210	58206660	61065800	27140750	25424000	68542720	65996430	34705260	-0.027	-0.1677	1	0.860418	0.782388
Ctsh	54112590	52381530	225832500	70012450	178728400	70079130	47417600	178926700	57377850	29112200	138032500	185104100	224900200	352196000	443581700	383878800	326541200	376179100	377039200	35504970	51271790	104264600	96288600	50491410	67911160	89289600	70008140	31262910	246039900	277055000	219338100	318974200	167158800	382514800	340048500	493705600	371894900	334069000	-0.038	-0.131	1	0.854946	0.793511
Bckdha	884052200	578299300	628741900	421058000	209692900	736269500	408756300	507257900	388071700	271890400	486197100	538341800	440310200	437843900	573309900	472071100	444442600	504383300	220668600	743109400	567619000	454357000	296812200	915011900	513110400	410750300	632368300	339453900	733895100	392404300	580561600	371541500	234784500	568157700	525790600	558856300	474791800	238647600	0.023	0.2168	0.997058	0.768386	0.861145
Hsd17b8	673352200	398201100	238055100	248998800	55241590	471881400	262137100	228437600	210040400	154249200	211265300	212386800	104927700	98771200	144438600	138408200	63700800	107388400	43454080	554212300	344758300	207196000	129770300	612538300	325705400	217709900	313679200	184010700	331109700	121564900	162538600	96652120	63677020	124140100	122431600	73594870	76833900	42775310	-0.016	-0.066	1	0.843903	0.810949
Hsd11b1	612999800	1599226000	1828723000	1544532000	1722765000	1160489000	1546137000	1225825000	1871772000	1991171000	890294000	1427811000	1951515000	3730777000	1689568000	1952604000	3149270000	2314835000	2482645000	769496500	1710131000	1758815000	1876130000	679088500	1404547000	1466985000	2374610000	2626338000	598451600	2490869000	2518827000	3301020000	2891895000	853131500	1636180000	2874403000	2559800000	3086801000	-0.003	-0.0187	1	0.834645	0.822005
Sult2a2	1753228	930092	1249122	2261300	138470	1558402	1383412	521892	790702	1130595	403826	152224	376020	931587	155190	237526	0	570244	64443.2	747688	1695159	649549	948243	970762	667569	762685	1751286	1133902	58922.8	269612	2349740	2469688	224266	159383	152381	78776.3	231962	757952	0.099	0.2994	0.986359	0.735581	0.869741
Ahcy	2599149000	2292521000	3292955000	1853713000	1196076000	1915301000	2309453000	2025485000	1593474000	2952008000	1208593000	1437775000	2074086000	2887790000	708686800	1531351000	1463976000	1899844000	786169900	2050051000	1631340000	1633677000	1594741000	2065224000	1630881000	1924006000	2289458000	2161010000	922484600	1429088000	3562313000	2334268000	1649676000	1673910000	1085625000	1212770000	1938808000	2376383000	-0.032	-0.3138	1	0.877713	0.72731
Fmo1	851834200	1332043000	1948355000	1553765000	1193303000	950712700	1357033000	1576292000	1681599000	1836945000	579030000	903628300	2077473000	2745078000	987379100	1514859000	2651796000	1553628000	1918243000	897902000	1270351000	1861979000	1644757000	716801900	1135765000	1572893000	2295085000	2002409000	564267300	1327474000	2670220000	2383763000	2126364000	613627400	1391045000	3319214000	2163716000	2325703000	0.043	0.2962	0.986913	0.736949	0.869454
Nat2	155816	92251.2	71704.6	72363.5	47836	113454	129488	112725	118940	74954.2	18922.1	64110.1	53478.3	91752.2	42961	74036.2	50709.9	66287.3	56123.1	118884	43560.1	217754	68826.6	183609	100104	115528	193555	109048	39485.5	66965	67966.8	70762.4	47681	128144	42494.6	62279.7	86082.2	110458	0.189	1.422	0.242438	0.100151	0.84865
Gdi1	5582908	5791940	6893578	3764518	2226824	3275729	3833806	7189023	1601278	4486251	1975600	3756095	4555249	7461106	1312400	3408099	3338504	4023692	3168495	4758052	4763180	5028853	2448262	4405065	3286442	4384616	3184720	4048388	2919408	2271685	3721739	3919862	2171465	3033397	2488201	3522888	4190007	4247760	-0.071	-0.6907	0.852232	0.894374	0.502457
Sts	76330160	126150300	189271100	124466600	113086900	87406280	133553500	190942600	128261700	95408080	69960430	137992200	184203900	273629800	147694700	181316400	234650500	125622800	187554900	78844160	106755400	162210600	108656000	86367780	106733600	149804400	151084900	123372900	62827680	127161800	242665400	201952500	155059100	63290380	99530520	380576900	193153300	204915600	-0.057	-0.5237	0.966362	0.892585	0.61295
Arsa	205902	353379	684149	105684	1243940	310053	293899	404767	110088	67686.6	781742	100243	1374072	1419185	291764	1373116	2299451	1813867	2228019	221491	201091	192084	731644	146033	157512	60876.4	490775	408097	1013377	1690612	2051740	1215991	784318	2166976	2079048	1958463	1424748	1549024	0.24	0.5692	0.902138	0.593446	0.882225
Arsb	14067620	15904570	30686210	16161200	30980460	19462280	11202700	24168660	17211920	6462698	45947410	37958660	39113200	54337640	84627540	74638750	54061100	46654020	41859980	16391810	10612000	14615320	17352980	16128210	12869250	11687940	14284150	4950388	72795480	60681760	47162660	56775430	29875130	95229540	74696800	68023090	60448620	44441480	-0.035	-0.1258	1	0.854128	0.79501
Shmt1	238066100	209847700	166438000	154662300	45942210	131905000	174087100	144128100	115957200	243505100	43968560	44818890	67586910	88895590	14490650	33141700	36842370	47610570	21083200	202236500	143477600	124561400	92401020	194846200	121881400	165402500	157867200	218538600	28337780	38174580	116702800	56986520	55272960	23261980	24035080	37472680	52595630	69839320	-0.038	-0.1546	1	0.858523	0.786471
Krt6a	1989141	3993131	3367340	671831	1534372	3764266	2820861	7296240	252019	771722	4084297	4598066	4041882	1622184	2292237	4222998	3452678	238950	1223258	2112590	2976532	2346572	836313	1404917	2544497	1579745	808336	914286	11068820	5817133	2492762	421170	5073598	1487106	2363293	3060703	3292279	542742	-0.064	-0.2013	1	0.864994	0.771317
Csrp3	8025082	5575374	957613	3333786	137311	4404708	5486152	2008008	3143332	4381377	229008	1045721	2587.88	91861.1	2028621	1698535	206153	309092	213629	5385192	4422152	1947797	976324	4542877	3981014	2872516	2816003	3471715	254758	382692	59236.3	507383	180138	1541615	847340	235280	559285	218920	0.031	0.0595	1	0.816711	0.837666
Atp6v1a	98799730	128608900	260865200	172277700	313476100	98577380	123674800	215732600	129276300	122349300	126001300	200708400	374482100	499671600	111191100	259010700	272050500	355017000	229591700	122022500	119520400	248432500	251433400	92764330	84481130	141902800	151997100	131919500	662244300	334077000	436927600	337079900	286353500	193369700	141671800	387006300	302282100	342275800	0.083	0.4735	0.940443	0.649707	0.880218
Atp6v1e1	4159709	4875598	9228595	6340250	7355246	2414153	4988105	6818124	3163351	5690399	3656074	6750459	8904319	10530440	2325412	5580494	5512090	8943413	3604953	5550704	4368451	6672936	7175893	2985241	2275724	5232853	6345390	6362062	18028060	8752296	11643390	5304910	9224654	2484690	2782469	6770493	5046281	6698268	0.045	0.3108	0.984298	0.730646	0.870734
Acadvl	2857304000	2034851000	1710886000	1361893000	799827000	2332003000	1547020000	1486738000	1314473000	906960100	2041359000	1996986000	1502680000	1584510000	2685367000	1988418000	1581906000	1623086000	973918300	2787704000	1708119000	1725048000	1080120000	2600559000	1479440000	1308672000	1900082000	1015773000	3019577000	1615100000	2244344000	1542028000	871410400	2527770000	1932801000	2244566000	1736316000	985765200	0.007	0.06	1	0.816585	0.837757
Pa2g4	31907300	94342240	114927000	70943490	58057880	33924670	64339250	109790000	68959250	78800110	9097267	43616500	42316030	72761920	10592060	35951540	24151980	40207330	30528700	32723310	75079630	83174470	79205710	33846580	53920790	94214090	88032880	89509670	16693800	64925400	46950160	45766700	64945010	10859070	19223230	24162430	35560640	32881420	-0.022	-0.1249	1	0.853985	0.795267
Rab7a	320121500	415305900	564940500	602895400	464724200	416421000	419479000	624405100	499396300	547668500	255113000	327097400	552465000	820475000	346255900	425441100	623437800	479733200	606400700	315615900	376868600	753322200	588438400	307661000	429694300	549803700	686920400	493505100	345669500	455451900	706751900	578305700	540459700	251029100	376130300	791135000	654992800	588092200	0.002	0.023	1	0.825518	0.830735
Acadl	3007170000	1904213000	2180386000	1496128000	835804800	2427011000	1425367000	1676209000	1246572000	782559700	1743618000	1835873000	1641325000	1784025000	2490032000	2134481000	1747125000	1952544000	1153411000	2455277000	1607373000	1726177000	1020524000	2894805000	1655846000	1293794000	1760979000	1018982000	2831956000	1631974000	2105743000	1549999000	803252200	2802835000	2224126000	2507547000	1952634000	1031311000	-0.02	-0.1806	1	0.862222	0.778241
Ppox	20206940	17178560	13476710	11120240	3449779	14717640	9940700	10916990	8006178	7968756	12200220	11487600	5933685	5537008	11553500	4450345	4295642	4826093	3100820	22278040	12542160	17705800	6572829	21358570	14455770	8366733	12242190	6822078	16244420	8109226	8182197	3491896	4697078	6565163	6140850	6049755	4908588	2351560	0.007	0.0349	1	0.822734	0.833065
Camp	1648722	1536721	2623260	1486304	1374299	1073722	1432055	3565870	346231	2202962	10941.1	567853	15851.9	238468	587799	109872	293963	154337	121490	2116196	2680816	1702392	625506	783974	950466	588258	703408	449397	123257	168971	110931	297940	613426	4583.61	190209	159264	1435099	202289	-0.229	-0.4932	0.979528	0.891229	0.631862
Gla	2747337	1487338	7310256	1861772	8485912	879152	1302235	2373736	1185869	1016729	3067839	2773919	11475670	13377540	13579280	15044890	15502900	15463680	17861630	1828912	859932	5624018	8623967	1939387	1210826	902620	2153636	790152	5715909	14786070	11586980	14509900	5204793	17507730	15729860	31182180	18650460	10021940	0.137	0.3521	0.975671	0.711949	0.873954
Gpc4	3247738	2774394	4675411	3700949	1804369	3001190	3046317	3866818	2545405	4541905	1813602	2312257	3175276	4363983	3249985	3604529	2810570	2533005	2727261	4172507	3038688	2985493	3329953	5207057	4104320	4581482	3677315	2588739	2976107	1585161	3623309	2266393	2324541	2675012	2429379	4666954	2718340	4322581	0.035	0.3803	0.968767	0.69845	0.875821
Hsd17b2	348427400	417449100	220070900	371573300	247273200	353433300	493500800	484921900	459761700	718953700	206281300	268313300	288678800	471436100	375271500	150259800	248257400	90247720	114982500	403339700	484291900	540080000	392727600	258460700	462031800	579785700	787664600	663226600	77723020	149131600	339604500	195592100	475383300	55109530	73266650	228873400	244605300	207056900	-0.083	-0.4196	1	0.886676	0.674773
Hsd17b4	14502210000	14980770000	16407670000	16986970000	9961492000	14717440000	15599150000	13256300000	14488620000	15374460000	8414380000	9453666000	9029222000	13985520000	7837326000	11084810000	6301269000	9357050000	8926275000	12379870000	12440590000	13087040000	16796460000	10960110000	11989030000	13973700000	15607890000	14576980000	8877503000	11108690000	10203470000	10621640000	12942090000	8108834000	8667272000	7826611000	9052589000	10965500000	-0.076	-0.7395	0.808532	0.893218	0.469367
Adcy9	223227	391033	522654	361381	277951	278358	514605	355669	151090	227876	160751	520009	653601	839924	102747	264360	174204	339700	52364	215936	397346	134864	318288	206239	198032	150614	446939	198882	162186	55460.6	479796	173081	388983	17276.2	73173.9	72840.2	208815	223163	-0.513	-2.439	0.003341	0.830013	0.000981
Gss	3805598	7505004	13113830	7540894	10632110	3063413	10127400	15672180	4442602	10788260	2948756	6036492	16907500	15927830	3992066	5418845	10354460	4280340	9286746	3054399	5342747	12302790	4863285	4062445	5206897	8957898	8866934	12808810	3482783	4422512	14165310	7076441	9210981	3843592	2959355	9522891	13258490	13953780	-0.095	-0.6833	0.858547	0.894489	0.507478
Atp6v0d1	74522640	76422740	116965800	86145220	131556400	88950070	72388440	138360500	66356460	68194340	88190770	108143500	164724700	203323500	183426500	194101400	207104600	174598200	250598900	73742480	59083510	127681400	108507700	76846050	253449000	103115700	98913260	67231060	205054200	147828400	155188900	169395900	106319800	176566100	167677900	390444600	232812500	192504100	0.108	0.7318	0.807907	0.486891	0.880902
Slc25a5	6229711000	4666949000	4179050000	3904986000	2078112000	4897977000	2990483000	3191725000	3142908000	2370671000	3931176000	4343438000	3462255000	3706988000	5286595000	4668784000	3516110000	4295462000	2874668000	6376083000	3629819000	4712218000	3111662000	5744063000	3506641000	2971272000	4512023000	2298626000	7322788000	3925069000	4051052000	4290702000	1927753000	5690780000	4553749000	5290694000	5244345000	2352210000	0.026	0.2873	0.988392	0.740711	0.868636
Lum	11748610	8309999	2164871	4327292	2605186	7797962	12955140	4478058	7671277	9154329	1677267	931623	1257596	5152585	1203050	783475	970734	1400983	667992	5200332	4909887	3907461	1873938	10216470	12940270	9290223	8016002	3697943	471123	2375856	2620592	5286722	2800608	1030875	773867	2265920	639076	1604717	-0.039	-0.1419	1	0.856625	0.790309
Apod	2515392	2106566	985658	579581	1280793	2732848	1770662	2026624	1639715	997954	920888	2057445	1193177	2932925	2438727	2393467	1204639	1628786	1230920	1429951	1632030	1069987	728959	2295945	2146307	1481752	1802305	896722	1121451	2666005	1112346	2254262	1134860	2654059	1532863	2693869	1018215	1717264	-0.041	-0.2556	1	0.8716	0.751481
Sqle	7017560	11999270	14237550	12012010	14282450	9860509	11200430	8967375	9633407	15241070	6513246	8082222	15926530	16838010	9263568	10778350	21330100	9642465	11014250	7398935	10086470	15423580	11894780	8455695	8592598	21581340	11134630	11055880	9437674	20939180	19991180	14780050	14753070	6566871	9533091	17418210	25926190	20660340	0.143	1.286	0.339167	0.152977	0.854616
Tst	5493427000	3839134000	2639236000	2575485000	433550900	4129071000	2399745000	2178510000	2138464000	1516580000	1310533000	1776539000	680690400	675192700	952656200	816520800	573928400	681230200	260859500	4555769000	3050782000	1502759000	1164167000	5965622000	2838100000	2334832000	3258056000	1884131000	1920574000	963425300	877948500	571737200	543041200	917786900	689301800	760687900	643004800	333099800	-0.044	-0.185	1	0.862824	0.776797
Jak1	2147719	2108510	2828705	1804267	1312175	1243455	1005948	2511005	1390330	1672016	532981	1958571	2218743	2445801	1313709	2235545	1641617	1521019	737178	1586857	1749209	2021923	1671109	1043384	1481192	2470735	1108339	597849	810286	1090324	2609503	994632	1261377	568591	810115	3829447	2870057	1296840	-0.149	-1.3784	0.263032	0.852772	0.126379
Pon1	567045900	887875100	1224536000	784371300	789968400	661259000	624584700	1218525000	703270200	771979300	440151700	645314700	1516224000	1741242000	690613900	805806800	1408921000	1022072000	782974000	472667500	822762700	984847800	843185900	509124900	662913600	816400700	1169630000	685546100	299505100	1136785000	1639244000	1353598000	1021240000	413791200	1002416000	1994124000	1106178000	1099154000	-0.012	-0.102	1	0.850244	0.801632
Pkm	9873856	19123780	16150860	32030430	16075390	7309943	12825310	23955800	10948590	14098810	8090737	10571670	14539790	13522690	4352508	7281858	5943400	8296570	16577380	9291499	8916881	35793790	18323570	8056352	12091450	22802630	17421580	10633220	13348220	8957780	9212346	5258495	8486313	2000258	5819094	16952150	25961970	6153059	-0.115	-0.7107	0.83473	0.893983	0.488884
Ndufs6	27845840	21190970	8956266	9921782	2753135	23492840	11585690	8034948	7468646	9738723	2118962	7825864	1768414	5999622	2682547	2615125	1975472	3838110	2062294	34490060	19594480	8114142	4748741	33753650	14703390	9287857	17519100	14379980	13877690	5682363	2692048	2624531	2263210	3752245	2372840	2240447	3060125	1718394	0.112	0.3839	0.967828	0.696684	0.87604
Rida	3353810000	3527037000	4887630000	3320766000	2558451000	3089805000	3407766000	3981442000	3032781000	2703312000	2980080000	3333398000	3995026000	5369617000	3134809000	4533455000	3717774000	3666510000	2927317000	2832497000	2838524000	3147715000	3146609000	3169981000	3242910000	2942915000	3790157000	3162264000	2775835000	3690257000	5251213000	4591261000	3316416000	3506757000	3399768000	4222432000	3762865000	3624921000	-0.056	-0.8407	0.710053	0.888879	0.401927
Gck	1863187	1309313	925805	1162518	1465554	2375376	1285913	923511	1594601	1505178	277324	867131	617742	3587354	781880	1319603	1677011	551102	616228	744858	1481010	1796647	859847	1340509	1177888	798342	1068827	1579460	2850702	887604	608226	1211043	1507122	1660109	2561554	2954158	1855672	1817805	0.186	1.1116	0.480265	0.241058	0.863607
Efnb1	189107	185025	230779	161938	89144.9	111245	151638	172315	111391	198124	35666.8	179177	337466	480311	89161.8	92383	134334	265715	95002.3	157928	123178	202050	173974	229558	100104	69295	208352	77558.8	113894	66285.4	283152	263289	121588	103560	113020	286259	305755	206227	0.002	0.0144	1	0.827479	0.829008
Cpt2	1506777000	963027700	861830700	687795900	339318300	1143121000	765149200	694804600	673908400	489855800	736793500	815216600	610853800	645018600	825618700	671658400	533731200	709873600	358487400	1294988000	911660500	777836300	580997800	1447914000	773088800	617486500	1035109000	520442200	933322500	641191500	780279300	671670200	379630400	917851400	660320200	671058400	671269100	374058000	-0.001	-0.0148	1	0.833831	0.822861
Sult1a1	381742800	321900700	153324600	319024600	79142250	298207000	270360300	235515600	208181100	417678400	77985700	103858600	111910300	161310500	67091320	78348650	82188240	90990250	57968710	342408100	238367400	278687200	166593000	347776200	301128700	270883300	379152200	315421200	37417920	67052440	123715000	113300500	94348040	54558650	61584530	105493500	129094200	115697200	-0.047	-0.2301	1	0.868613	0.761107
Sult2a1	31621280	48083210	37926330	75930610	11212840	51957830	32361660	13942100	58488920	55460130	20869290	8033660	19988020	56048220	6582131	9729607	10737560	33911530	8767916	32112760	81356060	30246510	74802510	28872950	17340640	14807660	33403560	84104920	6449237	33540350	16719860	65693810	21086250	10979230	20377920	5712753	19404620	31424250	0.056	0.2379	0.995024	0.7605	0.863578
Ndst2	584149	2221088	3016449	1921977	4877402	990996	1942509	2053453	1541405	3549990	814582	1177158	7048293	7885368	1033446	4075312	8262208	5560347	7140683	325271	1998045	2408231	3176468	862129	342260	2199523	4410694	2439852	778405	3024518	4308239	4956615	5707869	809726	4656906	10820630	8777789	5268383	-0.073	-0.2735	1	0.87358	0.744381
Rpl10a	43236870	225109200	254680300	198987300	252516800	85602330	195528500	356473900	239205300	268131300	36770970	149407600	253532500	418263000	55084600	151463300	225417300	206652100	204693400	50700560	227589400	290860100	281894500	71038510	183791400	289364900	341445500	311525800	40353500	220732000	279196800	275567800	303762700	28856190	124374500	225950600	225040500	280404800	-0.002	-0.0103	1	0.832882	0.823837
Dbt	1071726000	613915800	472496300	389834600	200464800	761403200	425223500	421047900	403003200	255412300	492558900	511687000	335679400	380347200	397910000	327756700	281058800	367566800	160972200	812821300	597144100	472501500	271306500	892990200	525122500	387495200	592957600	335979500	754744600	357230800	511327600	285033500	233090800	391707800	363942100	298959000	293185900	150760100	0.01	0.0758	1	0.812514	0.840562
Cux1	1332732	1979170	811952	1701536	708624	2075312	1034134	2465667	793751	904034	420230	1094068	2175446	1521721	554365	347267	389271	1524492	591098	303305	2009252	841970	2734178	2812888	1389601	2106897	321980	1214657	3128544	1728273	810857	1628537	630845	1113521	974432	2874784	935089	838425	0.18	0.8914	0.677098	0.378142	0.875152
Pklr	185959200	220624000	159740100	111989000	58310670	100028100	146298300	209859200	92658670	232796700	91399370	61673850	115419100	135101800	33737680	80346740	60017890	68322800	38786640	180609500	132872200	111008600	111328900	186877800	104921700	152461700	157285100	234827800	58435900	83406300	123544300	110470500	80498530	66162220	55641770	50112480	61152420	124134100	0.028	0.1886	0.999076	0.778399	0.857632
Hccs	21111730	14512100	11557870	12040790	6556669	15048000	9820500	11881390	12506180	6814539	13730960	15531460	13843240	10474410	15005070	10710430	12631130	12046920	10367770	19098290	12500150	18657070	10200900	17830750	10884210	10532080	15580900	8125304	22929340	10184500	16509590	12390110	7412417	17045990	9818743	22102020	16381840	7819130	0.066	0.5501	0.910629	0.605138	0.882008
Fdft1	5770923	20163500	23745440	19390400	36593190	8560590	11354740	8719780	11592800	18490990	5458232	14573850	21454560	41696270	13814660	17340340	37842690	22748570	26636320	8232399	13593200	25566680	30915120	10370950	14219260	50742110	8999718	15656220	3554710	45866810	14279300	37778460	16751010	12944460	22927830	21981570	58113370	22878520	0.128	0.669	0.849345	0.529235	0.882043
Pctp	3077383	3129674	6870109	3306185	3122964	2694254	4022155	3761431	2520180	4682660	2893957	2940279	3636896	7005659	2181631	4776781	4892957	3513864	3403413	2916483	3303674	3567225	2808370	2348123	2228164	3058849	3480653	2511027	2404247	3101344	3835464	5114023	2063871	3105201	4950225	2672540	4688129	2955848	-0.175	-1.8025	0.072396	0.837095	0.028948
Pitpnb	3228932	4089485	4728747	5839248	2565303	2335914	3241987	4088488	3171913	3137880	1755973	2876938	3187229	5403932	2900045	2747500	3700453	4121960	3180880	3413761	1494317	4195080	3138070	3134654	2673649	3140962	4700473	4091331	1495003	3214776	3181229	3369286	1191432	2563937	2836094	5329998	5173679	3590732	-0.101	-1.1127	0.449758	0.870123	0.242117
Slc16a1	31268340	44724270	67516300	36779440	63891390	29211810	44897500	40191930	41374390	49285700	31742860	51263060	74046320	116809800	46748060	54723450	64650890	60122300	49736620	29031670	39706250	46153390	36742110	20030310	34751130	35698420	37432830	42887420	38898630	81719170	86188930	58731210	73298830	40072430	39205720	79859760	71636990	103643000	-0.043	-0.357	1	0.881682	0.707256
Rab2a	151938700	240837100	377023400	328615700	222785100	209543300	228113700	357862900	260678500	276063800	137021100	189122400	379679600	487911600	247336200	336507500	475740400	357603700	373538400	171512900	210804700	392226000	289455100	165239900	220145800	332739400	375727500	223452400	182575800	304411100	430965300	416269200	280006000	198201000	344056400	653127100	428098000	381004200	0.009	0.09	1	0.808716	0.84299
Idh2	3060008000	2055551000	1703983000	1592207000	478210200	2205431000	1519500000	1518006000	1190916000	926980500	1222707000	1397005000	1085229000	1051568000	816716300	1006061000	815014300	918373600	508272500	2504933000	1674483000	1503875000	1038964000	2897884000	1658127000	1248062000	1984466000	1073172000	2372989000	983309200	1203889000	928981500	588043100	744942500	849245500	1256394000	1031608000	570617100	0	0.0039	1	0.829817	0.826849
Polg	219635	80327.2	127906	36191.5	7173.71	151330	13703	84279.5	20167.2	31424.9	120710	49800.8	121271	142726	147154	13955.6	19879.3	211243	25037.5	127650	41617.6	119810	93607.2	31672.9	15202.6	21878.4	65262.3	39826	190688	192464	139990	207453	29614.2	241336	123072	55014.8	34612.2	36442.6	0.233	0.6958	0.83247	0.511291	0.881646
Stom	75136860	95499470	101159500	71349700	77656310	65644350	87280550	86890540	66855280	73951830	64392180	89879960	95261850	160558100	57252680	88838800	111530000	100814200	102563500	57941220	89544860	90388040	73440530	60700880	64653450	78990070	93125170	70635710	44877880	107642900	132336400	106009000	97216510	33808510	69931930	154158800	106356200	88880170	-0.076	-1.0545	0.500498	0.874462	0.272931
Rad23b	3725132	2990638	1639478	3632814	1114319	2645642	3273122	2309121	2457899	5124674	2258506	1572157	1351233	2734679	1063046	2286767	1677818	1023179	2727979	3152509	2092908	1821339	2143306	4869146	1983020	2503750	3015343	3103061	740219	1991107	1919486	2485866	784891	1339491	2688557	2089889	2130430	1374594	-0.095	-0.6878	0.854718	0.894421	0.504425
St3gal1	4928737	13799960	16872930	21824200	24353290	8247996	16794400	16375630	16057570	21177300	4765440	8888797	27025050	37960200	9880721	17950950	38432500	13593400	20536900	5245485	13585910	30541310	7774786	5568663	10991310	19470720	26765950	11589750	3761725	16545410	35561970	22364480	23433330	4146007	17800770	45774750	49259020	22964570	-0.012	-0.0611	1	0.842995	0.812155
Ephb4	3822390	2308997	2749691	606564	3079100	2450260	767102	879680	895936	817341	1893744	2447979	2910591	4133566	1748693	545013	5118342	5179613	1292336	2726291	690173	1000830	1439355	593426	757991	894438	633830	571160	2459373	1911410	2025392	5958278	1877103	4297321	2487991	5290787	2109735	1208683	-0.159	-0.6138	0.912818	0.894715	0.55433
Psmc4	21399460	16056960	9414780	14730640	5605302	9041384	17013010	8256622	9070388	19577900	2725327	3565334	7187350	6163844	2072732	2061171	2284504	1955397	1702584	17750410	10245000	14372040	3825224	13995700	10675950	10265630	12348220	20317620	1603611	3414777	11350250	1462269	4779756	565421	1537283	3000752	4127788	4118060	-0.147	-0.5456	0.955319	0.893361	0.599037
Tango2	875757	931466	509126	232483	363960	510647	519624	382622	197566	343170	19743.2	365958	292650	518652	161867	216877	181006	360332	104698	445930	383354	411769	295587	958551	124724	354046	266344	112645	638454	438558	112353	496433	168775	559451	130170	364479	695521	175608	0.068	0.3101	0.98443	0.730952	0.870674
Galc	4313540	5470093	6207221	5425430	5603420	4973973	2296615	4514178	2288571	1702084	5914146	6588624	8709513	14258070	19874790	17128410	15455600	13891700	13054470	4985942	3196347	5738711	5456135	3443380	3539727	2446273	3607071	1439709	20856570	12443790	10628910	13384970	6639290	16736010	15772980	19975250	11558160	9609248	0.045	0.1714	0.999945	0.784213	0.855341
Adsl	5190315	7214406	14924690	17374660	8808432	5313065	8879258	12279400	10812390	11907380	2260329	5779242	12398440	14578010	486642	8340685	13039690	10231190	13116140	4476199	7313492	14416020	10546110	4523406	6939103	15152770	18595210	11705780	3606029	9106891	19551090	12123300	9330049	1986908	5089242	11778350	15655150	14463550	0.108	0.5438	0.91333	0.608947	0.881917
Ddx6	3288883	6749777	10830190	7963666	8328486	4617940	7503035	10819560	8494787	8531137	4167036	5472273	9588517	20610150	5282313	6783730	14996390	12310410	14235850	5223147	6266489	7998656	10168100	4375474	6525207	5709662	14092460	9400887	3692418	8078744	14720260	14916570	12857300	3284123	6212267	18690510	15806920	13506330	0.045	0.316	0.983312	0.728363	0.871172
Hmgcs2	24700510000	12783910000	9850078000	8238692000	3116175000	21341670000	11179900000	6652088000	9089579000	6328503000	15161940000	10015740000	5461169000	5745148000	18412260000	9357584000	4514609000	7361774000	3088435000	19248380000	11526560000	5614677000	5479789000	24796700000	10590970000	8342938000	10893770000	7910985000	17340790000	7827213000	10542540000	6323002000	3908486000	15985450000	10665930000	4644886000	4167036000	3928509000	-0.06	-0.4211	1	0.886786	0.673943
Slc12a1	10503840	5439118	6401624	4476961	4060613	5613586	6522893	5545477	2332746	5623913	3709773	5212439	4862980	6818446	2452189	4062753	2612952	3612766	2083938	11434110	4329730	4881131	3113921	6403944	6709670	6771125	4365071	5770473	176373500	2857210	3908628	2287686	2596074	3716774	3869485	3604098	5472489	3268353	0.152	0.5964	0.889215	0.576433	0.88239
Pltp	5339897	7625920	3564351	6166552	4891571	10489470	13154920	6601318	9382172	14312250	2645802	3035323	2881857	5931047	5072222	3175883	4204796	4520785	5620802	4945493	5082017	8357029	4885146	10395860	13641030	19485300	11864010	11726650	1464949	6138140	7472748	3866194	3596575	2519353	2691324	4526442	4280458	4286468	0.007	0.0423	1	0.820961	0.834479
Abcd3	6113947000	5476240000	7721302000	6543559000	6345215000	8051311000	6443235000	5496408000	6923403000	7632814000	6442259000	4731109000	5552697000	9951500000	7589743000	6370527000	6860612000	5284250000	4532668000	6143555000	5984477000	6755323000	8719387000	4095029000	4955391000	6693247000	9103962000	7418458000	3562939000	5023991000	7324911000	6864786000	8466555000	4375046000	4515809000	5759687000	7197371000	9741429000	-0.06	-0.6485	0.886936	0.894798	0.531032
Pex2	5838960	12558550	2779828	8340721	7784506	3305456	8824375	14592360	5126830	5815575	2665680	12998170	3565126	10937340	10705790	7813131	15631090	5421648	10969160	5415467	9525066	8960987	5942474	2531684	6673735	6705818	5944908	5818123	10874510	11171680	5664063	7092184	9380194	7071773	9844737	11032940	24830810	7544098	0.064	0.3615	0.973458	0.707515	0.874605
Rab8a	53201110	58661730	67773350	52371700	48630450	49053020	53167760	61959110	51562240	52430500	34113670	50682090	59178880	83409140	44117210	42281200	46096420	40629540	46902550	42419440	50694270	62935110	52761680	47144330	48295960	65103290	67305210	60325100	52789270	54760420	67910260	46447480	64503560	38309400	38797120	63170690	52986640	51799820	0.024	0.4334	0.953651	0.671444	0.878646
Adk	407417500	383834200	218764700	305671000	117505900	297341200	345268900	250978400	219926500	406268600	137842000	153879400	168755000	284608900	86046720	108990300	85948810	138339900	65926620	350902200	285044200	272647300	195942000	380556000	261894300	262351400	318695600	355635700	112264200	113026600	188453700	173388900	145773700	109539000	67341800	105050800	148511700	146605800	-0.056	-0.3916	1	0.884546	0.689817
Cdh5	2619550	3077532	3046605	2206148	1426636	2769172	1943121	2606250	1878872	3063137	1717313	2376198	1731572	2947037	2031478	1879947	1207066	751603	902728	1643726	1674336	2204864	1759398	1529165	2497074	2389360	2300613	1570380	1190020	1456623	2308401	788311	1312998	347588	923143	1176040	1249056	1367713	-0.334	-3.0182	4.8e-05	0.82852	2e-05
Dsc2	11520670	8302940	12139780	11032440	6121987	12897840	11303380	10628460	10247800	9521835	6887798	9015472	8325049	17285720	6265044	8829133	6829662	8749346	6863068	9140048	8420766	5353922	3151550	9396646	6009728	9738723	11028290	13099960	5100508	7971627	14331530	9924331	10999630	6308731	6913551	12729660	9411173	13866260	-0.097	-0.9114	0.638733	0.884654	0.356786
Lrpap1	23426050	43609940	55137180	34704150	30602700	32809260	44368400	46280360	40411890	63627960	7040884	24799750	51605620	55202730	11330570	30053450	38534160	30222510	30762820	23108990	46704650	40614910	34264730	31591270	50799410	51821440	60517080	70324240	21504230	23364710	39877950	38446980	40644000	7323319	20750660	42341870	44845030	50780790	0.063	0.5415	0.914304	0.610331	0.881881
Entpd1	366878	845406	1753832	1983924	3282616	1365327	867567	1680417	1920635	1222776	1218104	1338191	3026764	3440587	2105874	1507608	4061393	2873263	7792793	502982	1560837	4983490	2843996	1325011	1370914	2019432	3043252	1227406	1367534	1337049	3203033	2829485	2083215	542976	1062804	7828175	6446908	2942556	0.08	0.3647	0.972685	0.705991	0.87482
Golga3	2191116	1726541	2509706	1818042	1561053	1191867	2040722	2603945	1721270	1540307	1646509	1990762	2899052	3266649	1375397	1379620	3635108	2270256	3286522	1942835	2839575	2321053	2802715	1390445	1419347	1706039	2196415	933034	1233148	2109051	5166430	4021449	3344672	1220755	1890672	4142053	3341776	1867523	0.054	0.4251	0.956192	0.6758	0.878262
Atp5mf	1303447000	962862700	995641800	670161500	533213400	1180439000	805762600	848850300	694943400	692255200	1254558000	1248090000	1386537000	1191886000	1846182000	1464610000	1394136000	1220354000	869739600	1456834000	998273300	1225448000	748688100	1411154000	925170600	683083200	1359010000	685066100	1911192000	898979200	1532741000	1283835000	652002200	1913918000	1281773000	2316579000	1714365000	846966000	0.089	0.7473	0.796675	0.476312	0.880511
Gfer	33823700	26833010	14116360	17192010	6794114	22184480	9586433	14598780	10410650	8919642	11570490	16881180	7129057	15084860	9197086	13358340	10115840	17442740	6814135	36887710	19168430	14574920	11403140	36864670	12898620	14958030	22781310	8697778	24838750	11869900	12463680	16977550	5413107	11366530	12780360	19303350	17596300	7121289	0.13	0.8104	0.747231	0.433085	0.878517
Rab4a	3802140	4164200	3854453	3284736	2091477	3507150	2482901	3318929	2901886	4406076	1549730	1625306	2351410	4292610	3434948	3444457	1921538	2583024	2172042	2617779	3092235	3753543	2258643	4409861	3634062	4362809	3973699	3475487	3251495	2007931	3183951	2831396	2919466	2041883	2400934	2447587	2849306	2681888	0.013	0.1557	1	0.789323	0.853154
Acyp1	5947944	7517383	13297670	5296745	4540499	7162480	9319667	9115594	8813869	8249627	5889257	6034080	12090740	17140050	5471060	10598170	8140681	10551140	10674420	7946808	7704619	9658454	10093280	7025347	7361361	7329038	8788773	6396446	7679966	10088730	14551170	13733040	9165956	5712967	8049985	13744390	9722580	13600410	0.088	0.9772	0.599285	0.322013	0.870888
Atp5f1e	37716630	14120480	8440056	10761710	4787755	26020300	12975810	10612700	15698240	11883970	4334462	10748590	3971449	4810016	2403872	5073721	2097420	3075661	1446590	34959240	13792460	13495000	11959990	29314080	14016430	10806710	17053350	11939160	26964410	10534190	7713388	4966475	2180807	2333043	2390866	996844	2563631	1082390	0.007	0.0246	1	0.825149	0.831053
Dynlt3	1501496	4818278	4871488	2106425	2226266	1269431	1442392	4795852	1675581	1759203	994766	1626697	3332304	10533700	1625622	4855655	4841043	6040980	3414792	3017549	1764234	3351947	2641912	1750637	1658974	5029659	2881129	1935182	1894062	4750734	2965314	5789899	1633263	1331533	3492425	8559481	7336751	4510339	0.09	0.5555	0.908275	0.601855	0.882078
Cox6b1	414233900	280118600	212528100	153664300	72713920	277003200	158536200	156259300	132481200	97247370	160133500	236355500	167129800	146158600	183747000	241080000	119888200	164109500	94784540	400796900	228736200	159438700	112664800	407964500	216263300	125868600	143853900	85790230	424080300	273784800	215640700	145096600	65376270	224774700	202056700	172437400	171728500	67665760	0.007	0.0395	1	0.821636	0.833947
Cyb5a	946675300	1444196000	2142949000	1456096000	1117981000	972580400	1297173000	1772334000	1509771000	1526905000	483347400	999657500	1615114000	2930681000	764986300	1002777000	1609641000	1509360000	1268085000	914708500	1559278000	1683893000	1468297000	831479000	1293760000	1640201000	2068628000	1774472000	450991300	989658400	1890227000	1710349000	2095797000	431779000	718201000	1553222000	1664592000	1667390000	-0.048	-0.4251	0.999783	0.887076	0.671719
Usp5	21631320	13830830	11362290	13395700	7335406	14412980	17733850	18172760	10986820	23058910	3378558	7284577	11434090	12078120	4589180	6060486	6014943	7228670	6101875	14752830	10109830	15614370	8880447	17542100	13937750	12613340	12796210	17487080	5257848	5470201	13402470	8495263	7651064	4727194	5224277	8376734	9871667	10011030	-0.034	-0.2886	1	0.87518	0.738164
Atp5f1b	33017380000	21118180000	23821510000	16545080000	9925225000	24407470000	16460360000	17133450000	15364610000	11223540000	22988780000	23695100000	21354510000	20838380000	31362340000	28131320000	20956260000	22754640000	14937050000	32163010000	20022550000	20538050000	14004290000	29721720000	18910450000	14822370000	23475560000	12273740000	41543180000	20884460000	25829390000	20428070000	10550720000	34347970000	27930170000	31298150000	24271870000	13801100000	-0.004	-0.0663	1	0.843959	0.810875
Cd38	23709390	27557380	36546730	47497580	17251710	30245140	25114490	24256820	29465160	39280740	17158940	25224200	14202590	37021930	20851310	30464580	23763260	21348790	17704110	28600320	25492120	31261920	29018760	19130020	40431690	34506050	38391380	26243090	19182830	15872840	30080620	29933740	28138330	10577210	14571460	22237570	21281580	22833500	-0.056	-0.7506	0.798161	0.892862	0.461867
Dnase2	3906796	2453062	7941287	4427351	8614967	3627819	3411101	8723227	4720467	4405099	2692734	6769861	9765417	12204140	10375790	14786120	15172860	15594750	18828720	2131710	4913490	8812824	7125677	4682311	4228951	4530494	5438760	4677768	4727594	13091940	9425589	10113910	6398939	12692290	10888120	24051230	16661950	13961950	0.085	0.3935	0.965263	0.691929	0.876606
Cyp2a12	264745600	471243600	588474600	473466400	501801500	333087400	396086200	658273100	544382000	615081700	286825500	375124800	744350600	1048397000	445622200	449853800	826233500	710308700	660378200	234033500	508203300	669586400	671207200	248154900	396775700	563113600	886011200	636841500	111450500	425314100	755937100	878478800	750162700	202069200	402361300	1140005000	984089000	873132400	-0.031	-0.2119	1	0.866358	0.767639
Cyp2c37	198139200	381888700	642125700	450978400	328396400	339006200	402615800	389620700	551608000	554968600	176803900	348810200	607995400	1152707000	390201200	539629500	658242700	668280500	495051800	224432000	481170100	520869800	593748400	169988000	333476000	397683800	720056500	714320800	122098100	482148500	713425700	879635100	865933900	154497300	347208500	590614500	572127800	926406600	-0.035	-0.2412	1	0.869938	0.756986
Cyp2c38	10475970	13241550	11693810	6385955	27862690	7393056	6246519	11566820	8217444	9213398	18671930	8749135	38079130	19790650	8860296	10343610	14840620	11553040	8801761	6163269	8758698	7395817	6275639	4557685	6583801	11321050	12772630	7363673	4353741	10818660	17039070	15899890	10506710	5727915	10517990	16680060	8146171	10223040	-0.281	-1.9321	0.043959	0.834533	0.016551
Cyp2c39	1135674	1788067	1206083	1958971	1551646	1035360	1307761	2585353	2208955	1918148	706484	1115565	2281300	4790500	1199112	1355490	4036090	2328125	2111616	813253	1721434	2094971	1295160	648106	1061291	2472545	3192401	2008638	434592	1885263	3340935	2785520	3184843	588037	1080260	3385654	2259300	2874904	-0.047	-0.3328	1	0.879515	0.71872
Ncstn	30238770	32404540	46978210	48434830	51006040	41401840	37205300	43864120	36219490	39941840	40830820	42246250	75171600	83678360	58448030	72095440	87560640	69344190	79067820	28790740	29090440	56177670	54002840	29987560	38821020	39930870	50758210	31401030	42040670	59329420	79307530	76762820	55144330	59042780	59137310	119114800	87930490	72535390	0.005	0.0389	1	0.82178	0.833833
Atp6v1d	8622594	8068196	9618399	8835204	8341884	4194297	9098156	6895206	8238394	12767010	2759490	4994018	10738800	14569340	2329483	4959130	8596306	7434023	5590361	5664909	4630455	9767551	8974930	9517926	6891066	7290570	10460560	14574620	5803392	5881619	14854180	7089833	11459420	2961728	2817002	10360040	7731983	9005549	0.066	0.6273	0.873249	0.556634	0.882377
Erp29	47186280	108303000	131994800	169552200	61996130	63557160	112232500	140847900	122042100	115049400	21788020	52560760	81459120	70225400	23489480	60299870	51475130	52566820	64966330	42330150	95158150	146302800	110529200	59635530	102255000	153048100	135728600	131804200	30801550	60340800	76598730	75508440	73600440	11611800	30334040	77352260	64702660	74510290	-0.025	-0.1597	1	0.859268	0.784896
Eef1d	46491460	58323600	28493470	42248160	15742420	29244610	42462680	47832260	31830390	41841090	4163844	17129180	13762520	26923170	5093944	8529498	4676022	7888884	6565948	52355660	42180580	26922160	14491470	32150330	33465490	41285130	40097780	44498950	5704436	14205210	28175250	8812330	19144450	4015095	9080253	8931176	9707721	12151200	-0.051	-0.2215	1	0.867561	0.764228
Actn4	179205400	76827150	316470900	211750600	54780440	207247900	69085880	281139100	208343000	301097600	156372200	117623600	267209700	110358500	221470500	223859500	255185800	271191600	244180300	141485800	57445230	194794900	176625800	155801500	240980500	216673500	213031800	169100400	185352200	43988450	286235900	171134400	100870100	214063900	248709200	386940000	283254000	237997600	-0.038	-0.2104	1	0.866167	0.768165
Tm9sf2	23271210	58056670	71847070	67053320	80292770	32891890	42518570	78487960	51054220	45331410	18947490	34526060	67647640	154615800	40402270	85468410	107144600	103817300	85679340	22825780	44950920	72158870	58655160	28553910	28622780	77966440	63506170	29251610	31047210	87897190	79872040	86356410	61358900	27333970	60732880	143576200	145079400	87529780	-0.048	-0.296	1	0.875942	0.735039
Idi1	7223314	12462440	10908360	12086050	5738856	9590686	7811527	4676582	7715650	11573030	7789602	8115755	6763501	6950327	5976761	5534030	6431792	7121977	3070282	14901510	7801696	10982590	8055786	9215098	9260893	13808110	7458993	8563213	7425075	8614986	7317918	6217978	3555686	11408110	8698150	5460677	9301624	4913274	0.087	0.6872	0.838016	0.517073	0.881788
Mrps21	2353249	2240166	2179113	1317892	502002	1779766	3434084	3056730	815119	593903	839605	1955174	1519757	1803998	810959	1765201	615083	1087991	1340753	2269401	2009887	3162948	1657783	3579749	1481820	1160174	2682933	1067838	1396561	1667619	1190435	1287985	2011576	1177825	773824	1097539	992088	3240507	0.153	1.0083	0.571133	0.302433	0.869235
Acot8	256199300	249195800	227648400	283336800	121291100	213450400	223404300	213855300	254867700	233859300	52054390	105288700	82359240	131817500	50712140	103273000	81243320	114752500	106016700	192718600	194974600	199950900	258705400	184410300	162670700	228521800	245417700	206949600	152327800	128227600	124548000	110327200	147318300	47522780	85384550	116347400	92263960	107377500	-0.019	-0.1247	1	0.853954	0.795324
B3gat3	1141520	632142	914694	1509939	1608581	924980	809145	1672815	1899390	1281328	494787	1880729	2955764	2931627	1314764	1864323	1932264	1553819	3173460	686072	603540	1173962	1119672	606426	1478206	2187419	1706608	1289248	870569	1015074	2972776	1536453	3099642	399839	1572820	5514972	1409808	2000860	-0.062	-0.3527	1	0.881307	0.709337
Eef2	702737600	1669138000	1737544000	1552602000	1153153000	621278500	1262462000	1954637000	1379652000	1720025000	235872800	701210000	1268692000	1958586000	386981600	877484000	1240698000	934327300	1051203000	676204600	1264023000	1824143000	1391900000	658728600	1149825000	1557382000	1733565000	1704900000	288720600	1150734000	2223584000	1198955000	1247043000	224404400	736651200	1521219000	1465060000	1318132000	0.005	0.0346	1	0.822805	0.833007
Opa1	252607200	198597000	185737600	157310700	94090860	219305300	171034100	184834800	149156500	129123900	176471900	216944000	161957500	193278000	238232900	134320800	155686200	123153400	90759170	234435700	191573000	209957400	134585900	242147500	171963900	134995900	228802500	125742600	228188400	146535000	198942300	171669700	149909800	137467400	119835500	196297300	183199900	111214800	-0.008	-0.0815	1	0.846704	0.807038
Ctdsp1	1357794	2254176	2772567	2191758	1223131	2456115	1591870	1422553	2733853	2531128	1666034	1744887	2268504	3745108	1750754	1700946	2278592	3128743	1195349	2052409	1255448	2828078	1612933	2211976	1433612	2277196	3277225	1207426	948136	1545352	2891140	2367373	2445873	1719109	533179	1853426	2632600	2988616	-0.102	-0.9265	0.623559	0.883659	0.34743
Gulo	509157300	604414500	952087400	712466000	612892100	607286800	502729100	928883600	642865000	744232900	321945200	444128500	886423700	1391815000	551608000	601299600	1126349000	893765100	778783200	427839500	529371600	764103200	709202100	394399000	470982900	819833900	676140800	550988200	292207600	637912200	1165873000	994193400	793828800	479802700	664950300	1360831000	1031232000	826585600	-0.048	-0.4739	0.986529	0.890207	0.643512
Slc26a1	90959090	128661200	132522500	102889700	156079200	77658700	104329400	95978910	92424160	145292400	64365880	147472100	176195400	309521100	77463260	82855550	97641190	117795300	83305080	73953290	108176500	87448420	90466170	64272740	86086600	88224960	86370440	95203400	70186700	122331100	143524900	113078700	163634800	76914760	96104500	132531500	148127700	148209000	-0.116	-1.2237	0.363776	0.8622	0.188778
Aaas	3878076	1610514	4675858	618521	1560727	4320693	2694393	1799018	1713697	1120257	816081	3879870	2632288	3905822	1332570	5665643	3888326	6593219	3368017	6409473	589159	4496202	1481867	3877749	3590881	2230609	1060236	860580	4014730	5267000	879604	2857084	1141197	5002057	4430969	3765634	3885373	1874767	-0.019	-0.0756	1	0.845651	0.808544
Tpm1	6062063	4407194	10162240	6148744	3819525	4552584	4659274	11397270	3640280	4286421	6078285	6424966	11087040	6244154	8288858	7339257	10670730	5999938	12346020	6018650	4082648	7972528	4023966	5320526	5922002	8165630	4189667	2454234	6271141	4266368	10345950	6007320	2270383	6898462	6708698	21984130	11377840	6029967	-0.108	-0.6771	0.863766	0.894572	0.511682
Tbc1d10a	167697	155649	1212563	132133	340427	725292	21561.6	498617	796723	1000789	36450.8	332946	1236459	266257	49096	163584	1011422	1063261	720364	668450	111837	939064	591928	196473	678730	884468	579003	396642	132651	46208.5	1177068	868050	555807	199494	687880	1344412	998289	944262	0.427	1.3356	0.302265	0.13203	0.852318
Tnks1bp1	820781	588513	575062	667712	303048	710484	458075	1014002	555665	766378	390174	301347	456710	446741	510350	218192	228517	382034	280614	854230	487402	809049	431276	568585	940374	841068	1075320	739306	289874	535228	565053	474580	389316	448251	592941	490642	310243	318121	0.135	1.1128	0.479239	0.240381	0.863542
Bcl2l13	64432700	62861420	60752490	68414900	38021150	80757730	62718850	55874950	63222250	50528010	43313460	54671680	44522990	68912020	80537780	60287690	56697620	58037490	38872120	54441490	70878400	83000140	57345030	57358260	58113490	53956970	98106820	50577800	56553260	57603630	59907420	71570720	49003280	75740180	45660450	80671510	68213590	57113110	0.068	0.913	0.657646	0.363759	0.874132
Cgn	209284	131825	227861	138484	254694	79431.2	66976.4	308269	96135.3	237328	77797	105350	198303	160578	220342	240910	144067	220623	296846	479492	352280	298382	91709.7	75377.9	238219	144165	193577	35494.5	708568	95509.5	547147	293757	198001	45382.7	182926	445422	211347	82711.2	0.159	0.7095	0.823377	0.50204	0.881391
Fitm2	2191181	5125755	6625316	4339319	5915445	1024314	6405413	5371350	7718276	9763273	1876058	3447492	7243861	12718530	6406490	5977719	11843440	6516551	8569571	1956346	4677003	7388196	7449024	2175551	4121570	6806374	10839770	11720000	1770386	3603469	7109141	7912218	8741991	3021630	6353755	9965999	9091965	11800930	0.064	0.332	0.980095	0.721209	0.87246
Eif5	6214518	4370552	3823523	3441071	2338429	3525380	4564902	3436185	3159460	5960915	969835	1418821	3224660	3293125	208461	1562176	1860087	1671208	1649230	4284996	4162898	4221987	2568513	4596900	3248776	3295429	3806588	6276301	507422	973439	5225734	2030711	2599354	627148	632475	2215442	3421341	3262634	0.016	0.0816	1	0.810979	0.841564
Lman2l	404551	238351	264689	171220	181985	107709	202616	148776	66326.3	107891	137948	400149	447618	303886	259789	332089	794886	30240.7	435059	366043	242424	592791	167165	194632	87655.3	230611	401782	119914	198722	329766	1108104	298886	116801	102766	262621	311781	327438	326591	0.166	0.7022	0.828262	0.506975	0.881531
Arpc4	80443310	85222430	161649500	112301000	56906800	86778990	63453620	116768700	88274660	130959200	41868210	67639020	105682000	97298740	46017990	76615550	83521950	80850620	84839750	62276120	59479960	110896300	90125330	64123020	107202700	104898700	117106900	97731830	31570600	57355860	139036700	74989910	72390740	31825110	61377090	100493300	105097200	90240190	-0.09	-1.2153	0.369815	0.862772	0.192566
Eif3e	7981146	15727370	7632655	11575490	10841060	8207345	12845470	8768907	10585180	19260140	4441850	9024494	13395310	18956830	5378402	5260545	15107350	9172429	8921865	10480580	8640373	11125790	12355090	5653445	8883968	9828407	13107730	16681850	8494134	8864305	14434930	13902660	10537500	4022204	3867170	11619410	15989380	14945960	0	-0.0026	1	0.831234	0.825484
Pcbp1	80379830	119949500	100448100	86810820	37442200	87755340	90642260	108955800	57736610	80154390	55539350	65484030	44950080	87188800	78267830	57506000	33443630	33453400	20311220	90430320	77726010	70812750	57325830	77451190	71831060	119786900	92740500	79149550	59948480	77336640	61826870	40419130	46884070	57392400	47056160	45844960	49230750	45667570	-0.005	-0.0388	1	0.838715	0.817464
Gabarapl2	3298516	2251074	1775585	3541507	2428344	4138303	4922161	3709769	3989726	5830260	628634	609930	1470790	1616227	447706	874222	2036380	1713582	2898246	1074222	2488452	6105890	3640232	3698776	3436151	5398364	5792481	3491470	405918	1230357	2606745	1804927	2059597	497712	842030	3006632	3343908	2065011	0.061	0.2946	0.987185	0.737629	0.869309
Ube2g2	3486486	4042925	6542963	3120324	6722641	1975969	2632898	7402551	3870517	5048310	2111776	2378051	9215351	11291060	2483471	3844592	12853140	8445257	9662198	2548747	6128235	5305866	5651334	1336061	2746788	7789080	4494258	3975484	1670528	6674328	8542413	11146220	6110370	1748504	6701336	12255630	11216580	6901727	0.035	0.2107	0.99756	0.770603	0.86041
Nploc4	3287020	5304532	3633983	3732252	1150611	2585813	2883642	3347196	1562153	10186730	729503	1949127	2662939	4286308	832684	1225977	2090288	839735	961383	3338743	2080402	2279733	2410903	2225755	2706347	4063012	2852449	3204105	1264995	1549261	1719813	1917245	1188566	621007	954316	2966731	2022398	2393227	-0.092	-0.6511	0.884895	0.894788	0.529277
Cdc42	45975620	71094850	95043710	65359190	48889940	47492320	55602860	73591710	49100430	65943630	35160600	59847070	84268610	114346500	40033950	57705170	59622760	71460320	64699250	49148440	53875040	89892300	65846390	49897040	48064420	62126420	61299240	54751040	47002350	66828270	76088750	58670110	53982920	36859080	52574670	95636300	85991950	73684940	-0.013	-0.2291	1	0.868492	0.761473
Eif4a1	291519900	249234600	206804200	234731400	140519200	174866800	185511400	215521400	132533600	253806600	102193700	126313800	212986400	221653500	98440020	161193600	169369500	136593600	142093600	221705500	155564200	264596200	171817500	175606000	157257200	178271700	191645800	209886400	77900040	138356300	256744500	162153600	106847800	92936720	113764200	226512900	236117900	176762000	-0.071	-1.0756	0.481656	0.872885	0.261533
Rps20	5007140	13073450	8653332	4680214	5015944	2592995	6125470	7980761	3331302	8252589	589757	4226235	5532912	8491915	1630896	4056785	2792606	4545946	3948488	7533421	4791662	5561141	5451326	4994182	2426627	4914029	2851960	9172630	1191954	5820161	9929912	3520440	4749445	700495	2669089	3040750	4254052	5856173	-0.132	-0.8328	0.717973	0.889298	0.407091
Dnajc5	527826	242815	321426	522938	273645	222789	249298	618842	214060	575418	168250	265784	366531	653298	226093	268829	672165	433926	202184	437466	633539	233148	755447	549308	318848	775546	222043	396451	466218	302791	272936	596190	82013.7	166090	88107.1	985028	2256075	126198	0.07	0.3639	0.972879	0.706372	0.874767
Rab5b	2798474	4418939	5121462	3516952	2823151	4989447	4729084	5289451	4351232	5261174	2404442	3220470	4621434	6369296	3474182	2558839	2263988	2023804	1479424	2242657	6157283	5688325	4088609	3326503	4606207	7151079	4131901	5791304	3194239	2477588	3935188	2533948	5525949	1823152	1826925	2782982	4184693	2238834	0.003	0.0248	1	0.825102	0.831092
Chp1	15500960	27533730	37473460	21373680	9367453	18365240	25312980	28538550	27460550	30012160	5323383	12234090	15485290	21707810	6653089	9784510	10118260	9775189	6904206	14881790	27785490	23773150	19234310	17744610	24927590	26739250	39922020	31231040	22071510	18044890	16214770	16767520	18919610	4818368	11534840	11755150	12040000	14431950	0.156	1.2238	0.387612	0.181907	0.857679
Rab10	82948940	114236500	133355700	96490530	79381920	74725840	95940880	96416290	103136700	130424800	54920940	98326270	125220500	194464500	94698100	109198700	131261200	120727000	127272700	108106500	107150200	163573000	119228400	73641910	87636040	101418600	118292700	108659600	79119920	124029800	203700200	125533800	160805400	87023530	115864800	159901900	135281100	134469800	0.098	1.4275	0.238844	0.09832	0.848431
Rab8b	32850530	34563570	43456510	30648300	32440170	29142620	30900090	40344020	30178300	29769040	25987440	32965830	42178820	54794760	27860550	31550990	34739680	30607370	33211270	28031060	27869270	38423690	35221490	29048540	26886190	38844180	36898040	33014730	37103800	37752800	50048480	31518200	38946970	24004910	26627920	44056700	39839130	35127300	-0.004	-0.083	1	0.84697	0.806652
Ube2k	116306	689549	1441707	826531	330060	107860	124270	790807	255758	0	114861	567967	53509.1	311218	445417	165831	576923	441047	78656.5	511361	336293	715569	360377	73377.7	267695	601709	0	0	276130	139336	728212	341086	156418	130728	359459	617771	629363	571630	0.048	0.157	1	0.788907	0.853338
Ube2n	45635940	35966110	20723610	34082260	6283478	27478470	30693790	17953390	19167460	33022520	11152890	11522070	9800304	12465320	6454465	9806353	7615344	7057446	6133802	30640560	27594960	21925670	13167260	30765420	26280400	24243580	24045770	28464450	9215685	9472191	18347020	9840890	6039773	4170954	5483297	11936820	13968310	9190746	-0.027	-0.1408	1	0.856458	0.790636
Actr2	101549200	96693730	211999600	148042800	90386050	118524900	80035850	191986600	115171800	159480000	84766190	111445800	211164200	200616800	144254100	158524100	212766300	181919800	188132800	79453690	74043400	169110800	126100700	93083160	154101200	169159800	160715100	114289500	83920430	77379700	231613700	159081700	102802300	94218430	134302200	328428200	236053600	185757200	-0.047	-0.5183	0.968881	0.892368	0.61634
Actr1a	188533	215167	462350	681988	320581	66889.4	122835	197706	786600	923818	18491.8	26483.6	52739.2	505881	11615.9	0	43203.8	425292	318004	0	136263	226458	293154	207446	173473	345268	628222	389350	173072	36526	69630.8	322170	708874	0	39686.1	104796	207810	289401	0.011	0.0269	1	0.824615	0.831507
Arl1	10292260	12016370	14890530	24230940	8825063	15094880	9449318	16292440	15308870	27194650	7392999	6420242	22531340	13006270	9966831	16411830	21014100	14246840	12294710	10615760	10841860	21635880	18993230	8837212	13984380	17643620	21552070	14005690	8789497	10370580	22799050	13222560	8122218	9324273	18845020	27646540	21988590	12518760	0.052	0.5322	0.91818	0.615895	0.881724
Abce1	4106677	4677696	4381242	2532490	1722508	3113924	2562964	4198605	1588499	5313742	469926	1899400	2605649	4520681	1160097	2597226	2970218	2012431	1280767	1599943	2128572	3780328	2845926	2691090	2931502	3078279	3293631	4281840	1099917	2253809	3464636	1914464	1726007	760475	1791264	3669933	2867672	2425330	-0.056	-0.4958	0.978506	0.891357	0.630273
Rap2b	203710	641126	185585	460071	899452	713384	374533	532543	330930	452875	258975	462661	953332	785248	329233	472365	1493625	743027	1915741	139476	551332	1277420	435050	887166	641360	547662	638446	489313	290440	696052	564205	465939	837212	159790	397195	3879533	1703761	725932	0.094	0.4597	0.945164	0.657315	0.879729
Rpl26	18891320	189487800	266177800	200505300	337257600	70601360	200327500	306840500	242668100	318877600	38111840	194179900	394432800	670968500	96094370	220294800	379501200	309421200	298401500	49679310	257723900	354395400	358459000	53258320	208904200	302677300	428556000	440128500	36422990	260159900	458472300	397905600	452082000	37276650	139201600	439723700	398313000	466240100	0.105	0.3977	0.964113	0.689827	0.876844
Rpl27	49375710	389354700	585315800	461281700	613375500	154069400	413092100	564192900	454682400	590593800	84326550	328887200	698244400	1240657000	204215200	530641300	870177000	654416200	759734700	142949600	454796300	631112800	690318200	108959900	382561900	499925200	736138600	760779800	84838160	519046400	920986800	802168100	824692800	84774470	335046100	1017566000	949098200	925170600	0.08	0.3219	0.982157	0.725747	0.871657
Pcbd1	105540100	84942550	141390500	82091930	54261740	98804500	98779440	117633500	64663880	103685600	50677360	59353470	104865300	131514000	42958770	64080440	56229070	70294750	40469260	89375520	78916130	80565290	70101520	94266860	81989600	95730850	103390300	99801360	40452560	57963040	115255800	79341410	63949640	71754130	43680820	68717240	87886960	83363450	-0.023	-0.2599	1	0.872084	0.749802
Rpl37a	8842871	58759650	38834450	56509990	61756310	18742460	46409040	93726280	55246560	82874660	4538345	25423470	27368450	114415300	6600397	17794060	34712730	45987830	32205340	15937190	66425130	77357790	78312190	15107580	45078380	85710770	102559300	98615380	3722630	43907580	36662160	58347880	69970260	2850705	14042170	26433080	50503330	46352820	0.074	0.2722	0.990702	0.746957	0.867184
Sec61a1	182522900	625465900	553846100	445451900	652870400	311234500	442658300	395345900	554798000	466778900	237016100	568183900	704861100	1123296000	656853700	668188100	927656500	707702400	779688300	165274000	480709700	812394800	564201600	173807900	395777600	434235100	610337600	593718500	202647300	834013500	1126302000	877027500	741780600	220931400	525767500	1124611000	865677200	946120400	-0.031	-0.1829	1	0.862537	0.777488
Arf4	8279717	5324996	5246707	5380865	2903645	4610194	5387149	5369776	3112465	5019630	1810105	2765228	2903409	4341283	2386476	2425671	1585810	2417615	3128534	6312119	5224764	6167574	4897896	4093505	2826206	4008616	3311620	3698126	2351260	3638270	5666905	2783267	2288206	2098862	2353365	4457010	4396836	2614823	0.004	0.0406	1	0.821371	0.834156
Dad1	29128860	117103600	113855600	81246530	64090150	65291630	82127180	88088000	86051640	81865910	49758580	99417040	96183780	136718400	81468780	105484900	148753200	98106720	82073720	31247400	87647200	122800700	82755270	36721900	65903170	81281060	100355900	86890150	28405350	120673400	175951000	135819800	113748200	28165690	81811550	119155900	91549520	90178380	-0.086	-0.6731	0.867098	0.894619	0.514393
Abat	1483881000	1010838000	867191700	733969200	239244700	1171560000	660616100	470218100	621043900	445092100	972845300	847941100	641054900	663908600	1016278000	651618600	735619900	870968500	282309500	1538987000	844141900	660394200	539165200	1408324000	782145700	570827700	1043246000	473254300	1083715000	690870200	1037847000	602577700	350238600	1048517000	974598600	875205500	892986200	386190400	0.066	0.4999	0.930881	0.634785	0.881008
Copz1	1812675	3804862	3771559	2312204	1236253	1160291	2444064	4359012	1563056	1648012	814346	2411422	4339386	1846007	1152653	2200574	4578962	2782637	2714734	1086492	2556721	3434118	2410908	1407298	1899310	3654946	3271146	2827326	811650	2128018	3757939	3080436	985695	1489719	1414636	9380905	5192994	1313644	0.007	0.0513	1	0.81876	0.836164
Ufm1	7306661	10879720	15835810	13573100	5196639	7614040	8789159	13724240	13937550	14511960	3905591	5339434	6452863	8082568	3239468	5369098	5777522	4754083	11099900	5784289	9410120	14881720	10001650	8205372	13787630	17294190	16171730	16482110	2413711	6851165	6861922	7248467	6754151	1633634	4007529	6030768	5595599	7291587	-0.061	-0.4319	0.998314	0.887558	0.667903
Ap1s1	2305898	2008744	5662875	3855465	2209124	1521995	2103319	4778806	2152688	2567811	826239	2171749	3859353	7452158	1223925	2197061	5728575	4297958	4245946	1738537	1910085	5187085	4329625	1556134	1446217	3658921	3604335	3466420	1073378	2696660	5326096	5076379	2475660	345246	905645	8008367	6012236	5293594	-0.058	-0.3446	1	0.880589	0.713205
Hnrnpk	13055530	24147760	42570050	18439070	16203630	10129150	16084340	33958510	12756020	19234290	6885409	12734990	16514300	36750380	12791650	23854620	19451450	24219110	11871440	15264700	14437610	24309980	12992900	7982487	10271840	17059040	12877930	16023370	8984306	29688360	26345520	19995730	21541780	4833549	12953640	34550290	27039060	18914540	-0.11	-0.9366	0.613453	0.882978	0.341235
Ywhag	56383440	41478920	49730390	32447290	20747220	38000860	33306000	42299860	28941440	38285390	18893370	19440280	30907450	35935080	20831630	21598470	23794270	24181800	22626160	37907890	30399920	42954530	25970610	35587550	33608320	33559680	30219590	34356340	14727450	17342050	35029820	24797440	18089030	18704310	21630510	33701250	30769340	25906330	-0.085	-1.2214	0.365423	0.862356	0.189811
Rras2	8059944	9210657	14200140	6900083	8334167	5104934	6677524	8685572	4697130	7824343	5491232	8625331	10576010	16275270	7972301	10499170	7986152	8893630	8253305	6752698	6106386	8417670	6472917	4533012	6061637	7373244	5462254	4759761	8839299	11049170	12986330	7559529	9895302	5554770	7574401	12840020	10969750	11967170	-0.054	-0.4893	0.981025	0.891032	0.634237
Timm13	111963600	84717810	46763770	31705170	10983730	75962130	45459210	33602160	28173240	28509580	18472420	46002280	26640700	24198830	25810170	35386700	17854650	24628990	13812390	106819200	62891800	30715740	22195180	101986400	46713580	29894130	48779860	31262910	57044800	44838090	32059070	24845620	14299450	35729750	30649980	26563650	25330320	11678730	0.091	0.461	0.944727	0.656604	0.879777
Rps7	33446310	79824170	39512980	55985310	30441670	37101730	55843000	63296150	48086960	87664720	5582473	18844620	37129230	52383370	5981685	21719800	31458010	25573640	16188130	54457090	63634530	72371110	57352210	29036830	39394550	61378040	66690030	109279600	4666227	29965110	70206350	31958380	37316000	6922909	13705070	25131700	29323900	49165120	0.089	0.4238	0.956584	0.676478	0.8782
Ppp1ca	11734680	10694890	15441810	11123500	7232353	10116110	9740798	13536590	8394107	13602290	6234166	9661541	15153330	11165020	7538038	11057060	12482420	8282817	17017060	10083230	8576084	14822740	10054450	8070340	10812390	12646050	11568640	11160530	9975162	7105629	17734130	10033630	7935317	6663140	7708164	18225570	14203170	12486890	-0.02	-0.2738	1	0.873613	0.744259
Ppp1cb	7134656	6286812	8408303	5288139	3268048	5470723	5362081	5621432	5174849	6797546	2332677	3277459	5298961	6894895	2992017	5031708	5004178	4979995	5543858	4853827	4073111	7402868	4794378	3532602	5284987	5567464	5422059	6418205	5457069	3745141	7256430	6114182	4532708	2075777	4061656	6320351	7527352	5697932	-0.018	-0.2956	1	0.875901	0.73521
Psmc1	31460430	28079420	22593170	26304790	14191870	16741470	25994660	23308490	15874090	29492380	6546477	11058710	17071390	20517580	4711163	9787110	8552783	8319091	6748021	26169720	16834830	24686740	16960060	21422690	17186110	21878200	23504940	30667550	2471733	9471453	28390760	13611090	12680210	4078472	7224575	14828860	15673060	14269760	-0.025	-0.1775	1	0.861794	0.779249
Psmc5	29942750	43844140	17293470	26829180	17359880	15360190	60103030	38763140	17126170	47251550	9081828	14949970	24851840	22124380	3469661	11065120	14601600	9001002	13099920	41699970	22365710	31442990	27023950	28907690	20385660	21095680	30427970	43200140	3344220	11930020	30346300	16676600	16201660	32891970	14183920	14949080	24626740	18194780	0.092	0.5086	0.927572	0.629764	0.881227
Rps8	89554200	176478100	159862900	85423000	88983770	66001650	81779310	191584800	60889390	125714500	15843910	53751200	84849150	164936100	20254140	57422720	107086500	83387800	83351000	105506300	95064380	106300000	101368300	87294350	69740620	164155600	98613000	128920200	23709550	77185980	98761440	102884800	83267030	13636750	34164610	123077500	117948000	133773300	-0.011	-0.069	1	0.844454	0.810204
Rps15a	51066890	103023600	135742000	75207510	81317120	42384710	61834680	113325600	58097610	103065400	23434660	51671160	129545100	141890600	27740200	62033310	162673600	95337300	93562280	60965650	63592410	91849360	100410800	40588880	46211300	95797830	89295000	140464600	26516850	64728950	188539400	117558300	92349500	20283540	40367640	158446400	133532900	140868600	0.026	0.1756	0.999756	0.782814	0.855911
Ywhae	64211090	56519300	61750410	53545330	39992520	49389540	48336020	70792780	45010970	82758270	27320440	32133430	55360660	70029210	31519820	32261440	56482580	50582740	61166320	57459990	43193120	59977310	39586930	51329410	50257950	56145480	53430640	70919120	30008930	25664550	55202730	43405920	41662900	35674330	37288640	64042670	76423240	64184660	-0.034	-0.454	0.992689	0.889024	0.655241
Rps14	19641120	54084200	36814590	23316780	20167440	16617390	22450020	45035790	20875130	37071550	2653308	12533420	18218230	27780890	4399724	9904584	10870340	14085620	13013240	24600990	29395630	26357670	26299710	18558700	16758680	38327320	27542500	38792730	4684938	21076830	32682380	18669140	21967650	3956664	5037347	9064544	13472860	19761670	-0.015	-0.0809	1	0.846598	0.807192
Rps23	8010372	25404830	6413168	15962740	8734536	6942433	15247530	20874650	12788490	40511180	3543086	2535885	2948134	7976013	1046211	396294	1036132	3293674	1900956	15977400	14868260	16100440	13125180	7197751	10939660	21476670	21287240	42569020	7409471	3509669	5846857	2593411	6436843	1409410	700672	1149718	2510029	3866164	0.151	0.4623	0.944289	0.655892	0.879825
Rps11	20868740	44802760	32966480	22245050	32706680	13277650	20539440	48248050	18060160	38955180	4244860	14013980	34996870	56961750	4351185	12855580	36455320	29470340	28396460	25850040	27819800	33937300	40347960	18686330	18796350	40876850	31457010	54927210	5262653	19116830	35705990	30938720	33988200	3731064	7144039	34105470	33720430	41914840	0.043	0.2317	0.995671	0.762852	0.86288
Rps13	23810500	86731070	79860900	65550000	68907250	30900530	60012030	103552700	53783610	113615600	12809120	33729570	61308730	109109300	13031830	38523250	58630440	50805270	40646360	50291070	62122190	84425400	88707220	34957430	44916780	91579380	81174840	146646300	10808030	47124100	122434000	66533010	75516730	8904113	20921410	59644040	65050340	74567490	0.071	0.4186	0.958136	0.679177	0.877946
Snrpd3	351955	939073	1264223	1411147	109314	1708337	29663.1	831245	2479512	745487	68020.6	67548.7	58150.7	561753	366274	433738	1175148	397441	136306	1765409	206257	1943400	2433209	196090	1014523	786282	2257604	620786	535524	266294	737246	3268209	142155	1450917	863771	179089	223442	464577	0.537	1.5645	0.158155	0.060056	0.843543
Arf6	101202600	119121100	137084900	121932000	45877490	100884200	77033330	105719900	115232000	136771300	56641930	83057940	90878830	90476900	89098740	94034680	71643760	86328150	68791820	99371320	88707410	100001300	89916780	79793330	115912100	96917040	126908500	85443260	84009850	56624090	93638230	64308170	59690030	58862770	105901100	105404600	121498000	77182850	-0.061	-0.7854	0.764834	0.891543	0.438481
Psmc6	8842055	9721278	2882832	5898123	3899930	3734002	7096819	6995566	2968617	9534075	2088013	1341401	5562045	8370574	2156142	1399698	3194786	1871213	2714531	7109703	5779166	8312517	8151512	6243872	4576047	8327910	5311945	9900094	766492	1463666	6719534	3789083	3308807	499926	1821273	3887268	3979817	3350306	-0.037	-0.1843	1	0.862728	0.777028
Selenot	6864658	14802300	21528840	12299990	16379540	8901943	13348650	19167570	13696080	12261050	5132214	12350050	26195270	31805270	15853030	21416290	39879130	18002860	24496920	8654682	14559840	22792700	19321220	5762489	11994980	16361670	19587510	15750930	5294657	19873830	34415500	26997380	23004870	4736250	19733000	52487060	28800980	26269410	0.067	0.4225	0.956974	0.677155	0.878137
Dynlrb1	308958	552021	744570	1387299	280871	406689	640397	408217	1658023	169498	88881.4	160170	263542	978447	76215.8	244884	95279.4	253906	153015	149633	689861	584285	237124	60917.7	248642	720124	595858	403303	394751	278910	1858515	134670	801968	263635	82942.2	422443	212716	221656	-0.021	-0.092	1	0.84854	0.804303
Rps4x	95741680	137482200	137141500	94483010	74059490	68241380	90638870	147736200	77934000	108974700	43522690	56435090	92704560	124077200	45814160	71032970	115432300	87692730	79731670	102154500	87252290	101688500	91539370	74588950	61340380	126110100	98388480	120164700	63312140	76016190	168363100	107333200	75955790	35895880	55194240	122480000	123593900	113357400	0	-0.0034	1	0.831406	0.825314
Rpl18a	67384260	383743200	473897000	436472100	516394000	142610600	319748400	537699100	417807700	558238100	58767330	280143800	474968000	961806100	110810600	418523000	737915600	591141300	636049100	126178800	346170000	548782100	610534700	112512500	306876900	475354100	641345000	624673900	80731050	491199000	612843700	724384500	641607000	74021770	316060500	849711900	775763800	818294300	0.098	0.3904	0.966101	0.693472	0.876426
Ap2s1	36999420	31808870	35242420	34951680	41576770	46848200	34035180	36685230	45130780	49317310	28316450	35800750	41537210	82682340	31338180	26124930	63617760	48782320	46188120	30201110	33925790	40873570	41636430	28979280	31835040	30426740	55041070	55865880	39293760	33012740	53175410	56907920	53312910	30989340	21991050	42890530	46801470	59221390	-0.027	-0.3038	1	0.876728	0.73169
Hpcal1	24085430	34304970	54261740	48043850	25554530	27152530	28455510	50748960	27738030	22928160	21022360	26935820	29257490	38088420	22505730	28405540	31496470	38706320	29581860	24757310	25343680	37940450	36911040	33210030	27832970	50959020	16562930	21679300	18970660	4522865	29915470	34971250	21062330	22787970	27397190	57642800	41367630	25957840	-0.158	-1.2836	0.322607	0.858291	0.162946
Rpl23a	12544900	128777900	71008490	90394590	60794600	40281660	123515000	148039500	109973300	155912400	5799729	43540710	33430420	99229360	7343263	24209140	19278250	26978030	24390590	30240860	146845200	106263600	89079270	36389180	114175100	157680400	178180500	183016100	4707399	53890130	65574400	44235360	75710670	5243660	11340850	22092240	25091030	39480930	0.06	0.1959	0.998628	0.775865	0.85857
Rps6	62177120	133083600	73814980	68948420	38957190	45350480	70893040	121783200	53544800	102145300	3441720	26639040	20148850	50779000	3879465	17511130	7075431	15977730	12287650	76235010	81460190	80353970	64384190	64196570	60453600	127815800	83390090	118121100	6591526	27958360	37312850	22538270	34202670	3153499	6762944	9234991	17588270	21339540	0.014	0.0454	1	0.820208	0.835064
Hist4h4	624933200	554534900	871663000	984138700	287785100	438820900	357802400	925642000	272038500	506055200	429102200	260617900	837826100	650662000	329012900	654150400	630607200	661675900	388005300	1289315000	400646400	1953852000	352537200	590331900	437815000	641660500	695774100	471647300	1247035000	290355300	1030883000	658041900	294299200	229540300	590473200	1629253000	1078158000	967049800	0.212	1.3946	0.26074	0.109626	0.849766
Atp6v1b2	29195240	34366450	79570410	36999130	74419040	17546260	30836950	61645280	18578310	24143390	32502450	53364860	84250670	117134700	21003810	71928290	46381690	83265390	49464920	29744120	24574480	51217600	54968900	23409230	17373040	32697920	27027870	26550650	198400400	90601060	75674600	67501850	65484750	44621800	30440770	71441180	65952470	74460730	0.04	0.2118	0.997473	0.770205	0.860544
Rab1A	13332490	27226530	39888460	29344870	30154360	21363710	20213990	50599740	27754180	38849890	11513810	25876030	34707580	53090760	26800600	23939630	26005990	23675440	40687620	14883440	32197350	53819290	43196110	17479020	27402360	40736160	34880600	27626460	21529200	24176310	28782110	34765670	34639510	17461220	23395020	43419450	50214540	32247380	0.061	0.6434	0.864351	0.54614	0.88229
Ran	40180410	48259810	44487470	46040730	15031110	27301040	33655290	40077360	24661570	34157370	12572690	21040740	20992560	43555530	11684000	21594870	13331120	16568590	13037510	38316260	30506790	39316160	21694280	30109660	28001460	34636430	37509930	32959060	16127450	20634400	34414030	24315320	16406620	8899090	13750830	21994890	22753870	21700450	-0.026	-0.262	1	0.872318	0.748975
Rpl23	41631440	241480000	153126700	139850900	87104120	89243930	194720400	218588000	166694700	222562100	15997340	79547170	54694080	129072600	20636310	54811430	44162960	42005000	31010580	69007270	194976300	161395500	151889600	72307810	174433800	249517700	258687300	212750400	16442510	117078100	116081800	72606380	98483480	10392800	32905840	51128830	46448350	70312350	0.062	0.2586	0.992569	0.752434	0.865806
Rap1a	12477540	18534810	28807150	15175230	11610820	11211570	12190990	24967670	9933107	13694870	9995938	15924090	18009820	35170210	13555330	14356680	16545370	19986810	18130290	10818760	15002810	15012040	13295270	13123670	12660030	18712500	15548760	11132720	13498830	13534760	16497700	19903250	13816000	12493190	12859240	34564330	25045670	16026540	-0.041	-0.4374	0.99703	0.887937	0.664789
Ube2d2	15764540	13669260	14825030	14763360	6894244	13093580	13871970	13435900	11732880	15089380	8473222	6792368	10831440	12306080	4227293	7451159	12029600	10005900	9930598	11816380	13162320	15061190	11345110	14298660	12939980	12702900	16059560	12535060	10030420	8811672	14057780	10572210	7458632	6099096	5939597	17897790	10776980	9858983	0.023	0.3448	0.977326	0.715347	0.873427
Rps15	913910	2098661	3703530	505383	552693	510571	806674	2957582	241651	329799	143402	561061	823135	1968300	53644.4	850939	357120	401922	131174	783335	1547635	1452932	719555	524861	813460	2133623	1179584	1316141	154445	1318155	4216428	951401	890315	92571.1	117620	92160.7	208567	410639	0.095	0.3091	0.984615	0.731389	0.870589
Rps24	6317562	25677520	24547240	15908780	18880000	6786450	18868430	27476960	14036240	31548320	2723655	9815046	16422880	19926730	1978839	8190349	11964100	10773190	10312280	16509590	20369800	30268400	30986550	8052805	14017260	23722750	24750220	39453370	3168854	15617060	36800650	11988200	25595410	2349064	6008561	11660090	12699040	18633550	0.215	1.1168	0.475826	0.238133	0.863324
Rps25	1490720	6096846	5554185	4771775	3419944	2378806	3747235	10852530	4000359	10093150	899324	2455015	2027712	5014077	1074582	1373544	1613985	1776847	765181	3027947	5815096	6286522	6601006	2318215	5219713	10139500	5217186	13399440	1324073	2231165	4576791	2420839	2863752	1368450	7000845	1517211	2058905	1667603	0.24	1.1675	0.433286	0.210523	0.860602
Rps26	20177810	33514430	23975280	22828840	18421750	16414080	23385160	36441870	22758210	34096630	3036073	12132480	12595220	24511830	2634818	7874233	8046575	9328471	7671008	22281220	27627090	35400300	28189020	17244400	19326440	35593450	29207040	43182170	5862606	13825010	25518890	15141210	20813090	2442060	4824509	8115532	10125320	12327210	0.095	0.4988	0.931294	0.635416	0.880978
Rps28	2979671	5715275	2712642	2153936	287371	3626310	3566630	4784213	1926640	5013114	132269	1277598	298721	1029127	3090704	2101982	952439	265128	392109	3341027	5995275	1883844	1303846	3874463	2508403	4285400	3445785	5469600	376830	1282438	1296599	807552	275265	1595088	6836.56	828403	488488	520275	-0.213	-0.5306	0.963025	0.892847	0.608595
Gnb1	26762430	36907150	42277850	26041310	28813130	22300610	20332210	38295230	19166960	17998300	28854350	39537450	49545750	62114690	30125340	33166120	39124450	40362980	38538520	28596330	24787280	30277940	25636530	21820580	22644410	35254150	21460380	14787740	52306930	39404970	36947490	43368280	23737650	25066960	32599130	62710450	52062510	34520940	-0.044	-0.3943	1	0.884758	0.688403
Gnb2	29885470	40229370	55785520	31405030	40930020	21214740	23865100	47326630	17646610	23720430	31892450	43797660	63619020	107963900	41715270	49731870	47737660	56386600	48598260	27848010	30047670	33367050	25464790	23191420	24232060	38461290	24806640	17752930	54697440	49666770	40463570	60623160	26166010	34181080	38729190	79441910	67195710	54078910	-0.086	-0.6559	0.881091	0.894764	0.526035
Rpl30	28503040	196764700	238003900	169590500	205259200	63440100	133412200	230573400	149985800	227205900	31682000	128104900	211729300	497431700	72615790	196969600	310217200	258861700	277884800	55929830	159211700	185738500	219815400	57338930	140561500	266980400	248839200	212774700	37575100	214398900	239355600	358154500	217290600	34638290	158999600	404986900	374510800	384963600	0.048	0.2272	0.996114	0.764541	0.862365
Cycs	726975600	482332700	428495800	316964000	158312200	496316600	284964700	322356900	212836800	217466200	326598500	396605000	370951300	268628200	353069500	335080600	230056500	279553200	180255700	750609200	445925600	290474500	260766100	664581000	355428000	275685800	378563200	246095500	666898100	343760400	441370200	301981600	176587800	375473500	268541500	385124200	316500800	177486600	0.076	0.6143	0.88014	0.565021	0.882407
Rpl31	22211680	224771800	242724000	169826800	287356300	58495920	205737100	299804500	220737900	275713700	20491960	153824300	304642400	502601000	52833040	166341200	293834900	253112500	269840700	55011350	276463600	311541500	274610900	60157890	195790200	267055400	368552800	334056500	25961290	240927600	404772600	347933500	375173500	25260610	132020000	323303300	276456300	371119100	0.148	0.5691	0.902184	0.593508	0.882224
Rps3	239810700	423229100	460494300	271368500	272488100	192656400	246004200	485131700	210898200	390031600	84666940	181852700	351932400	442989900	96938430	194269400	398745300	279670500	270197700	280067500	264977600	333194900	336132300	203821400	184428100	375576500	304059700	456626500	91466740	219172000	457840400	315232200	300209600	72324490	129694800	400947400	376836400	383113400	-0.031	-0.2582	1	0.871893	0.750467
Rpl32	61640000	394382600	495391100	335727300	529784400	147686300	401384400	504689100	458184400	497831700	88616490	314263800	671282400	1070390000	172993000	414284900	717661800	509874500	527010100	105025000	413623100	571929300	550004200	147693700	333040600	511190600	716622500	610717000	84643430	430726000	912016900	744334200	729885200	71434120	205494100	855606100	612351300	765668600	0.04	0.176	0.999738	0.78268	0.855964
Rpl8	23463530	208681400	107484400	279858500	451731700	75447280	214372100	462308900	395058600	486308200	49962170	193563400	382097600	767810300	43510940	85788250	490470400	361905900	516133300	57849240	331619700	348849300	429366100	74966120	187421100	377309200	488460500	493154100	62607460	251339100	250589000	499167200	606113100	69016590	112548100	322226000	537143300	575862400	0.161	0.5983	0.888274	0.575229	0.882395
Ybx1	1792086	5452074	6678851	2327366	2633505	5038265	2874141	6912337	1716325	2979622	959202	2638564	3293425	7378581	1105333	2048103	3262960	2691939	1152139	4369458	3656002	3395754	3379092	2859545	2366120	5493735	4140766	3901956	1530341	5880935	5238078	3190071	4405709	733719	1260866	1830762	3295910	2724887	0.058	0.4216	0.957244	0.677623	0.878093
Pfn1	202117100	173478000	88627480	147907900	24816690	130351200	160982100	104117700	82262910	175327800	17518460	43601470	35574000	29036130	20555800	39698570	20664760	30585940	34602340	154908700	111495500	107736000	59030340	147208000	143397300	135762000	116865900	144564600	23383880	22967140	37933160	32895540	21583820	16097980	24548430	56655680	40300540	21865060	-0.099	-0.4114	1	0.886069	0.679266
Rps27a	539453000	416165000	342892600	403267900	282928300	454002000	422576200	373539200	448330200	608426700	151379200	226860400	357442700	404483800	250428400	321258800	380340500	298806800	389388900	332840300	287054900	512715000	329262200	605797700	439358900	455327900	623819900	462763900	161691000	231528800	407533000	284236000	232086100	193335700	296159200	506265300	501466600	319849600	-0.034	-0.3895	1	0.884379	0.690911
Tra2b	880404	1919427	3869872	2875697	1156002	2228313	1387995	3369067	1058792	2805711	1048988	2549237	2927185	3590854	2591077	3484194	1927368	2380018	2523273	1659701	1428868	3558369	1504136	2232263	2199139	2103975	1301938	1505433	864193	2907327	2256105	2186206	861538	1960464	3119944	4784922	3889705	2312859	-0.086	-0.5765	0.937534	0.894173	0.579005
Rac1	312594100	337390200	255327600	222138300	238385700	191390100	251347900	216638800	163396400	187846800	153109900	273166300	280643800	499261400	173501600	222794400	204886800	201799600	192980700	228829200	232931700	257625500	220209700	206639000	195156600	211967900	214288300	176414100	236074300	254631100	267337700	281774400	256855000	159707100	139998400	296181300	287298300	241257900	-0.067	-1.0115	0.540346	0.877652	0.296951
Pafah1b1	48063740	86307970	131792100	115278000	88859280	58981160	86178900	118112100	110338600	103774700	38439890	64907800	116868300	126874800	53797490	84672710	96853110	82618640	104754600	48989450	75721060	117872100	101104000	54177680	77860450	104557000	113889400	120535700	37034570	79601950	153217500	102854300	119335000	29891740	62071870	124415200	117447400	99643580	-0.034	-0.356	1	0.881595	0.707742
Hspa8	826549300	963558600	937704300	681055200	485911100	626971600	795228100	1066933000	629887500	863001000	285461400	491925500	702442900	799428400	248777500	428754600	455325900	522377200	342879800	674736200	599202500	778846400	573995200	680544000	596682800	939924600	930655800	717099400	335239600	484531300	798412600	525515900	476683700	239269400	285503400	575485700	581298900	536936900	-0.083	-0.9909	0.56005	0.879156	0.308828
Tpt1	1659695	1914309	1398406	1435882	882377	1208812	1327931	1043782	1013433	1271354	514612	1994072	1038647	1229467	359228	393322	744914	560319	559946	1126243	907574	1909938	661593	1132405	522438	897820	1274300	1480782	450248	658810	2166065	515887	492216	602802	419203	1115703	1380105	748993	-0.123	-1.0198	0.532513	0.877041	0.292232
Mpc1	207126000	113940700	67159860	69783750	37803360	139572900	103317600	58750430	106556600	73669970	73686640	98569480	69407260	76931480	95583390	74701230	58779650	79771250	44831540	189488600	118091600	90911660	59518770	143306000	98370330	62437900	119631500	86012440	94589400	68499610	148720200	76397820	64996230	82749180	79759080	70890550	79228330	45770370	0.064	0.4915	0.934001	0.639584	0.880777
Dnaja1	34346950	21951180	15637600	20213060	12138330	33214450	15785830	27020450	17052620	29096900	5273921	8717444	18522890	24325840	5053672	10274660	11435440	14449840	17381700	30189970	15115640	22836960	18971180	34944000	18624410	22951030	20681940	18562160	6465537	9472347	24360270	17530160	11768240	5823351	8881695	23666400	21588520	13860000	0.02	0.1689	0.999996	0.785039	0.854998
Hspd1	7703824000	4790416000	3527192000	3086049000	1189734000	5779197000	3488202000	3862829000	2823300000	2180649000	3029699000	3322721000	1717194000	1535517000	1415701000	1749224000	835812100	1414638000	593502100	6816283000	4037659000	3215051000	2205005000	7433868000	4234531000	3213329000	4612938000	2570519000	4246702000	2011757000	2157018000	1146731000	1221016000	1250122000	1609906000	840105000	1253294000	730659700	-0.034	-0.1656	1	0.860118	0.783051
Eif4e	2885435	3976995	4140693	3023708	2443039	2246963	2723164	4057012	2569737	4448820	1122158	2115791	2629140	3274707	780018	1865275	2201052	1616706	1837321	3517975	2436246	3539233	4637497	2541800	2684347	3465184	3941237	4689431	973662	1185107	5889833	2263710	3168029	724309	1386989	2572860	2171828	2558583	0.038	0.3364	0.979162	0.719208	0.872799
Mapk1	45265.9	568903	420832	165312	39337.4	202793	192822	682214	857206	202531	202883	173510	159548	740429	158755	661918	342978	129542	164942	1005467	68548.8	568165	190250	609424	387923	276982	879934	852274	683929	398052	226421	355805	1020622	71468.4	333623	391941	997801	156885	0.516	2.0353	0.019557	0.007854	0.832931
Ywhaz	109215500	82833630	92253120	90012790	48377910	75921850	71241360	90586140	58320980	89570720	39850150	48111990	67408450	82046960	41684000	44221470	49417150	53936480	57302230	81984740	61549380	99293340	57978890	75251040	71719080	78338160	73649020	70425150	44072670	36260910	81758930	54641500	42162750	37717290	43443490	87080690	79479600	56500940	-0.054	-0.7417	0.806488	0.89315	0.46788
Hmgb1	2754659	11678030	7421961	15513290	4676767	3856417	7887161	16827090	11718580	19506900	2643325	1585249	2654438	11435580	2373760	1833751	2542972	2240061	2725315	4686744	11170900	8775322	9696153	5505044	8097678	13803910	20135540	20023430	3064766	3801317	2321657	4682506	5984739	1059796	1520268	2915516	4846983	4795794	0.075	0.3196	0.982612	0.72677	0.871469
Eif5a	31984320	53840800	52419560	55711030	26129380	22547920	43403680	63961020	44419870	75921440	4322325	17223600	33992720	57499060	4508898	16392740	37318220	24767560	23185460	21180320	45542590	59420690	44484730	28641200	20392980	63366940	82571930	70548360	6024567	21977750	26769800	32194240	41325770	2755539	9336997	32662080	43177190	37320630	-0.057	-0.2758	1	0.873828	0.743447
Actg1	1335153000	824171400	1128674000	1159378000	648227600	1146822000	641261900	1013645000	979647400	1224356000	964653100	916872400	1102538000	886287500	840880200	744162600	929454900	955065000	1023532000	996394200	576966200	1277673000	1060214000	871465900	1160061000	972798300	914419300	813021200	1298196000	652152500	1605031000	821670400	630752600	765873700	877653600	1547411000	1238463000	825950500	-0.035	-0.4429	0.99567	0.888307	0.66165
Rps17	10145890	23758070	17841170	10885860	13865910	7708968	10188320	28015430	8506902	16736630	1949941	4433674	11742220	20690230	830087	6015049	11577900	10533770	6908444	12136050	11886360	16226830	17011570	10793970	8966292	21315630	13031650	21827890	1088440	7792416	14651210	12614140	10138170	566458	1643428	9595489	10097310	13367330	-0.086	-0.3469	1	0.880794	0.712113
Rala	4773562	5427378	11290050	4910971	5124702	3322389	4216359	9062255	3389146	4126021	2776765	5323839	8256939	14631610	4842451	6690918	6534549	7667892	5903746	3076025	5141390	6118332	5295122	3310922	3654112	4369986	5998093	4292026	7078928	5084869	6329969	7637308	5795267	4742645	4869969	11396810	8602764	7757842	-0.037	-0.3309	1	0.879339	0.719595
Rps12	29644220	54309600	43096200	33155420	23604580	18965370	28070970	52690710	27608050	44399490	4317823	17590510	19621540	39401160	6881615	14394310	13739730	17951480	13614700	29933450	33899280	28625920	30711990	32357960	25502590	55176430	40297090	51843860	5880315	18497510	22767590	21214810	26774570	3230933	8643789	13187510	24146970	18618440	-0.042	-0.2439	1	0.870254	0.755968
Rps10	3836201	11670930	7875375	5526719	2918546	4735491	6228063	6225253	5773870	10053550	586411	4107850	3233520	3080159	1100381	2050612	1333693	3774418	2493876	4531360	9136376	7831614	4143540	5887699	5861576	6784170	7515766	15640910	1477134	3462559	5466292	2650518	4621414	1335052	1776034	2084442	2690715	3604394	0.109	0.56	0.906286	0.599105	0.882131
Ppp3ca	2029717	1614340	2213847	631532	1092698	1293558	1116854	1118886	1219998	1692951	1151995	824136	1356362	2071228	1376207	1764447	885578	1716393	1297058	1494406	1051846	1399393	1274533	962824	1129483	481185	1049485	1074351	1139173	1301717	2167071	1544305	1123513	1755084	1435934	1375616	1667667	1811232	-0.081	-0.6203	0.908171	0.894761	0.549986
Ppp2ca	16336450	13660240	18234360	18100670	6152850	11663640	13300660	16441120	13161320	19291840	6240994	7345787	12544110	14129050	5630005	8451388	11811400	11154540	9436876	14360370	10379060	17139620	15047240	12422850	13768890	16708780	15793700	15023440	6897644	6974093	16596940	10991200	8159204	6097850	7017899	18491370	12936460	13017990	0.012	0.187	0.999169	0.778949	0.857423
Phb	1867097000	1341045000	1320827000	1078494000	547331900	1571778000	993357600	1087883000	1001481000	782480700	1487251000	1395594000	1147431000	1209475000	2028124000	1357700000	1301953000	1292045000	820916500	1845760000	1273244000	1358174000	863342200	1749720000	1167513000	916916700	1604203000	785326100	1852602000	1108038000	1506940000	1221022000	620284700	1855232000	1464941000	1835425000	1463520000	747837000	0.023	0.2245	0.99637	0.765547	0.862052
Csnk2b	7330213	6307124	6907663	6384272	3874710	5458789	3855152	8485027	4049984	7961402	3037890	3636010	7934820	7646924	2705325	5429321	9436627	9480702	5886264	6439868	3253948	7366156	5474911	5594930	3755687	6201213	6740660	6126196	3822327	3578464	7595679	9640496	4127689	3246426	4642158	11745060	9645303	9584991	0.008	0.0937	1	0.807705	0.843609
Rpl22	63524860	337992300	516281800	273281500	321402700	125013000	287936800	469336100	310288000	346416400	63302410	231707300	425701900	676873100	123927900	315354700	388885600	322837900	337454600	104463800	292383500	360285900	372394200	115063300	277465300	388274600	458087800	432761500	70213140	326651600	527777900	426558100	440368200	51293860	204778800	449456900	418489000	450641800	0.007	0.0375	1	0.822115	0.833565
Actc1	286281800	141063300	212365300	167140500	45423430	208097500	89765170	189791400	104476400	171855200	104528000	116844700	92565220	59712780	74685560	65042990	45843950	52481760	56718670	194649500	100586300	126365200	86042280	153882100	183895100	174674900	137550500	107972400	125007800	43000870	92852670	36449880	49922910	29789740	105270000	64538690	87201240	46426270	-0.165	-0.9295	0.620553	0.883458	0.345585
Ube2l3	168100	223344	167253	348968	99944.8	68836.9	101043	0	0	113556	45111.3	155722	0	570735	79226.1	7398.55	173051	364101	102300	35617.2	153622	294163	243588	159524	157381	0	243477	146900	386573	61140.7	162898	152249	0	46959.4	129022	132569	0	201076	0.171	0.3178	0.982964	0.727568	0.871321
Rack1	237967300	403726000	388434900	251378200	240218100	204377600	223704200	421892900	217958200	333895200	84407700	147509300	257914200	458772400	147217100	185278900	372993300	249740300	190768700	255555900	215080300	289853300	291838900	190908700	174351000	355126100	237099400	367690300	85850630	289857700	499547700	288796100	270725700	63744800	145127200	373561400	364894400	322905300	-0.013	-0.1141	1	0.852248	0.798313
Ywhaq	13036440	15351200	16758180	11691000	6599549	13670340	11399950	14832780	9343242	13677790	5486182	7459279	7776519	14032750	6782502	7122712	8221704	8960889	9849105	14202420	9417923	14465080	7797252	10289240	11890710	13466640	11104760	10485040	5583031	7471337	12179340	10638800	4662826	4603194	8360672	13205550	11731280	7376119	-0.07	-1.0579	0.497428	0.874208	0.271077
Tuba4a	40275730	45389130	83900810	53795300	40079510	27083150	34452670	78095380	28971230	35263790	23112190	34854950	48513010	63660310	18261790	30052060	31989350	37904150	36825910	29529260	30131750	50152330	42049300	32270010	27819190	51959600	27999620	38154510	30346500	34382610	52661730	43344620	26552980	14625610	17703390	61018820	61304220	57553940	-0.091	-1.0246	0.528012	0.876686	0.289522
Tubb4b	44832280	38774080	78333680	44215110	27614050	33329890	32245220	70390750	32745780	49324730	17160330	26572460	50709470	54510930	16907920	23646920	24685440	28159380	25489400	29032340	30006330	46762940	35718650	26666460	27065850	42521980	43008890	38853220	28748760	24668070	50381600	37449560	32514200	13350660	17788870	38074030	46240230	41799670	-0.081	-1.1686	0.404734	0.866044	0.214367
Tuba1c	44562170	50981070	103008400	64274500	41518190	38735910	38168210	82721930	36765720	54766850	29612150	44768970	68443230	77042720	26045310	33970930	39552910	53296760	52750500	37172760	38268830	75814810	58799150	36813790	29383560	57102830	42963490	46645720	36428750	47782500	54982060	46393910	40634710	23054930	25740830	78327490	72555220	67884690	-0.083	-1.1128	0.449674	0.870115	0.242066
Hist1h3i	202330200	178400500	221129400	305204200	80917940	144899900	98784430	263657200	93639670	132288700	109665900	75802660	220197100	176682800	78999960	139278400	131840700	166089300	96640660	457629400	139753900	595600100	103248900	171039400	146010800	188129500	197679400	148075300	322400100	84628370	285374200	181213700	92510960	59939000	148667600	358412600	221915000	211110900	0.249	1.778	0.067723	0.024922	0.837757
Ywhah	18178330	13616520	15794950	12028730	8845619	11367460	9106231	15008370	7742602	11674070	6528582	8387170	14407970	11965740	8801897	8900663	9620501	10936330	15093010	11148440	10055890	17035290	10224800	9047372	11002190	11515470	9167405	8807668	5551795	8144212	14807550	8356598	6357531	6944606	7382382	20051660	11340330	7792040	-0.143	-2.0777	0.024199	0.832536	0.008199
Sbds	1198944	5021961	4636117	2964038	2367482	1792267	2304630	5974904	4182910	5110587	1233868	963259	1992214	5562112	1134896	2571792	1843646	1816171	1531153	1452970	3585366	5240132	3090389	2008797	2326405	3348894	6597897	4452441	1046211	2038096	4249057	1423436	3642455	396317	1010380	2105569	4008682	1394467	-0.078	-0.4975	0.977828	0.891439	0.629231
Smpdl3a	5026634	6498724	13305890	14165230	16045020	7831855	7276679	11843350	10844600	8450933	14775180	19077810	33045480	39513540	46684970	50288590	49656240	58111130	44504420	4844935	4541954	20917300	18768390	5258316	5502125	8973087	10891000	6553301	36628520	29272530	20804590	42737470	18498540	45600280	69116230	59758690	55205510	52513520	0.025	0.0841	1	0.81031	0.841992
Kpnb1	20284580	15270510	14312750	14089330	8436536	13340600	20189110	14975710	11626060	20067030	5366893	9030184	11932820	9773805	6676667	7310297	6686871	7972143	9844142	19190710	24484930	20957250	10231300	19323130	10905540	14627570	14520450	15806630	9779355	11463940	17693960	7490425	10116390	6025566	6265656	17143990	10909810	11407750	0.129	1.2531	0.364514	0.167918	0.856212
Abcc9	552021	1231798	1872710	2963423	1618775	462567	817221	1850433	1593050	1790699	345895	919718	3092466	1836643	941581	1540480	1520815	1931594	1926591	674299	679940	2479275	1071345	362259	631580	2804165	2976123	2232464	1014267	1174059	1904880	1340118	2341113	659163	1357347	3054560	1605428	3047729	0.035	0.1993	0.998401	0.77467	0.859
Clec4f	101521400	189608100	233921500	151708900	162874100	110531100	93068240	216767800	114047600	126262300	129767800	146893200	144161000	285674600	152170000	157951100	192079300	263315800	274532000	76452780	113425400	188616400	142845100	98707890	109383300	197597400	191172100	92285140	43452600	125495200	192448300	201514400	144335500	45175250	89908580	258534500	174985400	157715400	-0.265	-2.3057	0.007949	0.830699	0.00226
Psmb7	3050012	1524831	841604	942225	275880	1371397	2172775	1728041	663031	2170193	663503	296200	1045820	1732332	1193459	236467	703141	1299187	882239	1659787	1565474	1095478	724761	1484476	1010828	1374237	1799075	2044333	1429227	759270	1640162	783426	1254986	173430	889426	512683	2036396	1192666	0.084	0.4268	0.955677	0.674912	0.878342
Itpr3	215573	1046994	1899723	1789512	1594949	460767	1151240	1458340	1596339	3224784	296644	1186103	3532726	4319753	668470	2993065	4412641	2253149	2568158	820658	666223	2995626	2176640	111288	668900	1361248	4137689	3127678	1550067	1649546	3261449	4584984	3076545	355845	2985602	5646608	4052676	4921172	0.183	0.6391	0.866768	0.548954	0.882319
Ebp	99208340	314593900	224188600	216791600	159554000	174645700	206170800	137558000	235174600	204548700	98367200	216562200	194505900	375270700	175360500	197411300	277479300	237316600	183987200	131760800	252068100	249527600	207901100	129303000	215468900	173515700	278115600	250444900	63168680	307865100	329492900	330680200	289775600	78624580	157990600	221384000	189981100	215910800	-0.024	-0.2301	1	0.868613	0.761107
Pfkfb1	1296587	2072120	1024778	893287	629831	1233123	1296618	1452490	592769	2634827	168912	719253	804052	580655	748504	948777	332948	363940	19128.2	1397500	667439	1207797	1411623	1933069	542628	1190198	1147309	1333841	1054978	816904	526065	356116	257866	796583	270196	1562217	190335	407008	0.088	0.3372	0.97899	0.718842	0.87286
Selenop	7706937	6454443	4664900	4718431	5797883	6111973	9463958	5305149	10805550	11794440	612258	1808456	5565686	9584570	2073579	2950294	5632596	4911774	6636221	3997171	3655484	5715941	5377605	8716554	9159165	6841611	10530140	9114633	771984	3604458	7863952	5309030	8043960	718601	1766415	4419366	5643305	5589999	-0.101	-0.5304	0.963123	0.89284	0.608721
Vamp7	6895645	6330658	6123560	4715841	7613413	6792905	9703160	8179359	7498514	9965419	3453857	5492378	6828260	10900150	8960486	8170329	14979160	7352024	11143110	6362642	4531728	7239464	5345828	7651753	7571382	11525200	10369410	5924812	3415407	6249572	6854934	7917398	6630737	6073262	4890529	11667410	12214900	12963900	-0.053	-0.5064	0.974147	0.891855	0.623749
Mpp1	10320770	16905680	30330340	24904010	11387160	11520260	31907440	28365890	17952170	22811200	4663630	22133030	12357100	14285070	6957214	10939130	12253390	11721470	9046468	14008600	22437260	24356790	10470890	13652600	15811610	31359240	23789180	11424110	38207160	23194730	27369710	14834250	14108950	2805082	4964534	15784950	13303030	9016185	0.012	0.0836	1	0.810444	0.841907
Aup1	555986	1303342	2131998	717723	1080385	491667	247039	1323892	620886	745071	49975.7	667448	1395829	2644588	1322488	1070781	1497763	967196	2126269	353455	887641	1760484	1263263	720242	624288	1205470	1234399	719237	332954	548936	1475898	1379404	1145953	348858	688231	2773216	1693202	1092907	0.046	0.2169	0.99705	0.768349	0.861157
Pebp1	59957960	63666180	50824800	43819350	7524328	32658310	54319500	43882130	26320480	61883040	1703557	10655150	6810223	10622680	4514163	3605471	4477753	6430916	4369266	42873300	48577400	24833650	18562530	54796020	37884670	44889960	49151460	53478180	5884093	6410796	6934823	5103253	10069690	2159945	3400474	7196084	7007451	6522062	-0.05	-0.1527	1	0.858243	0.787053
Stam	2450585	1014284	1586541	1098722	918364	1441156	1364803	1057955	1926617	1927679	324280	345243	702591	613570	363082	171265	809809	1322710	597276	1246099	950908	1094630	1008589	2103889	1818807	2742530	2228245	1148090	446117	869932	597284	417270	504000	185939	550492	558618	921153	635064	-0.026	-0.1429	1	0.856777	0.790011
Stim1	32342970	23790850	47900580	36126040	33881010	20767730	20949220	35177980	34360530	30799290	28472170	20975650	59657600	56828870	40917390	40708220	45787110	45390030	54558770	19173440	24110670	60132660	34524390	16516280	19305080	31421140	37703340	30959760	17523370	31415170	59228930	66295360	52144660	20819420	23795030	82752450	52228600	52558680	-0.032	-0.2518	1	0.871167	0.752951
Tial1	647026	401464	2443114	355129	1086540	1023568	1151287	1027731	316265	1280299	654566	494505	681672	3726335	1051295	610275	1775454	291517	146527	747063	182740	363329	643532	751693	1190360	1719500	348104	865134	591344	3712226	1659511	272574	206826	272945	225537	4506057	3499683	2139028	0.014	0.0495	1	0.819204	0.83583
Rock1	455512	273350	46280410	35939660	231758	33761250	13176760	47729430	132838	315247	351060	34974940	865694	30578050	1199077	283036	536257	467339	11306150	9252904	21096950	431281	38068930	4554459	44532970	27564440	610473	15941610	212745	29513	30758290	496036	160067	8546325	89947.3	35622270	22072280	731240	0.237	0.3271	0.981109	0.72342	0.872075
Rock2	1000678	613489	1764451	1350110	560962	778672	764383	1425698	1471092	1619111	488159	1421649	601243	1812535	425617	901098	832240	906304	1829046	1258740	1360561	686173	1172412	670279	1450984	1541991	1226613	626245	1051570	710915	2313623	2277864	1016644	336681	2529519	2344354	1283801	860160	0.141	0.997	0.581334	0.309494	0.86984
Hint1	66572900	68684650	39254480	62004710	17628310	39830470	63062860	55463660	34966030	61239700	8220539	20844490	14007780	26454390	4317525	11071920	5843327	10512330	6577081	61464220	45555040	58704900	31994260	47367020	41048830	47960570	48251550	62120410	14713530	12569570	14524380	10443980	19466700	6473727	6015399	7357354	12345590	10833930	-0.063	-0.2445	1	0.870324	0.755741
Elavl1	3488458	6433296	12154690	4836229	4352996	7534794	3681876	8030185	3718860	4449558	3371684	9221879	9582223	11060620	3940584	5386014	7191929	8287966	4939073	6191226	4195094	7385438	5424030	5012442	4014170	4954368	5352964	5070936	6147218	7251970	10394580	6736584	7111007	4994429	5034295	10032290	7164989	7692481	0.026	0.2302	0.99582	0.763417	0.862709
Hfe	424214	597439	712513	757448	6272677	225308	1092090	1321849	1418283	3784418	1304244	1944077	4086886	8011814	1444768	1223096	7755764	3021763	7282898	320537	924066	1526074	2237642	490671	733270	1953200	2716663	2734709	924347	1482744	2387713	4379054	7786036	996267	1253079	3410330	6914599	9117436	0.069	0.2183	0.996929	0.767836	0.861323
Igfals	3191602	4576670	2888313	4321864	4287358	2470943	4872751	6139381	5313526	5007970	1115432	3280274	4708438	9048942	2562916	3870883	4431183	3745684	5053101	3620359	4289515	3872264	3546293	3476998	4650943	5247421	6120966	3295175	756547	4284502	4306442	3678312	3180691	1598750	2870987	4980482	4707962	4848245	-0.121	-1.1202	0.443505	0.869568	0.238289
Usp9x	7767038	8310665	14263150	8193821	6462336	7416837	8616310	5436628	12482860	11198960	3175377	7220920	11769370	6492790	2365120	6342575	8450776	13137120	6743037	8158720	6195245	14906760	7274826	5101416	7457723	11976020	11158310	13538720	3152173	6635340	17928000	10136990	7419126	2775259	6504049	6297693	11591490	9717991	0.059	0.5413	0.914389	0.610451	0.881878
Idh3g	196912500	111138100	91183370	78397440	39961050	119804000	75748080	74174070	69951210	49570180	72282010	78244200	60255590	54349570	80579620	79044380	33911450	58262030	36854110	156022000	85066030	94582550	67895870	140654700	80846980	66820350	79934150	49530410	215762400	62591520	80511080	50162470	35156780	53927240	70504610	45093280	54661300	27264370	-0.03	-0.1739	1	0.861292	0.780411
Slc9a3r1	135510300	139653800	233589900	121091500	74168210	136857200	100415900	177521700	123986500	145429000	41662220	96513620	75004490	115845200	43629670	60465610	36117750	66449930	43628670	110081600	119790000	106071500	93527770	91851570	144076800	131189500	122333200	106842000	162951400	72575220	71870740	58813930	79379050	44593440	70106680	35047050	61350880	62984050	-0.092	-0.6081	0.916812	0.894663	0.558129
Stx4	45102000	39226170	38062540	8422126	12837500	7939012	9122613	13809800	7532246	50420280	11640990	11897200	46900700	130096200	33806430	50709580	57633180	27925230	67786530	21760360	49545580	35698740	26791680	5554166	7266572	10057380	32368440	9603141	11033710	9880862	14577720	38188370	62668120	10781840	13655400	47730740	75737020	15600190	-0.242	-0.99	0.560919	0.879221	0.309352
Siae	1921787	3358630	11724350	4919427	11773060	2987061	3044221	8643476	2489805	1541928	9134931	11187430	11781730	29108020	26642580	26734210	23038610	35354660	22668880	2059240	1859921	5323658	8940772	2059674	3684848	3961445	3363763	2115970	11442560	24887780	12482570	26699060	11556990	32587820	32698030	31994860	26988160	24412560	0.005	0.0143	1	0.827502	0.828988
Naca	15116860	16763130	9189818	13412230	6238438	5402556	13888670	17872910	8623522	16667920	2496827	3187725	3957159	9378433	1156414	1773037	4309450	4676197	4475045	9754561	11555330	14733580	9300746	8538615	5745261	16149300	14620410	17613970	2203272	4714878	7650241	4728804	5946161	1832677	1612898	3245816	5922165	5801264	-0.011	-0.0556	1	0.841961	0.813492
Akr1c6	968939500	690600200	229101700	620476800	169801400	585902200	695632000	503874100	421883600	965702300	130877300	150229100	157195000	246075000	73922200	85959950	105794400	143566500	89634770	713164100	498116000	545861500	333770500	573724300	510923500	564568500	459433700	793917700	113558800	157502900	375985800	134297800	180047600	69469250	108124000	118836900	143597700	178499300	-0.007	-0.0265	0.99999	0.836249	0.82027
Urod	4102621	3407384	5865033	3962716	2171310	2316900	4342513	4690600	2275839	5244414	717762	3005833	4853880	5077192	1371698	3258718	2586256	3376763	1982171	1885127	2390575	3998822	1157657	3390483	3426905	3835595	2860239	2769135	1121842	3815597	4496035	3424660	2513029	982154	1466541	3754772	4710951	3851674	-0.165	-1.4932	0.198068	0.847192	0.089489
Gaa	35486340	36482270	173525600	54386160	159736900	58724370	36610790	103935900	48180190	29332340	159592800	145828100	179882400	367622500	371907200	355764600	368820000	372762400	302327900	34498960	34468710	62516380	98266810	38714700	42946750	47524810	58661480	27960170	168210100	324377800	253037500	331060900	171381900	340633700	347021700	417879300	324794800	324841200	-0.002	-0.0063	1	0.83203	0.824696
Atp8a1	405654	303453	438986	350340	373902	243414	222764	550074	367274	325536	197155	173922	518493	394981	265431	716151	447902	351915	1596910	302388	20642.3	943325	451841	129125	301602	500434	160738	275738	194765	424016	661187	34989	183710	109646	224446	1420356	343912	214649	-0.418	-1.7441	0.089588	0.838537	0.036601
Cct7	148683300	137659500	231625900	192565000	103168700	152866300	128807300	211263900	149531000	200410300	94968610	101027000	151650000	190074600	136235600	120471400	119781900	143971800	96362210	142174100	108224700	163135800	146589000	167188900	152503200	177744000	156322700	157175000	106303000	94203950	185515500	138101600	115730800	121453700	139005200	146880600	195443600	167319700	-0.027	-0.4012	1	0.885294	0.684754
Cct2	160193600	135206500	247815700	175153400	94431570	147401200	115571600	203972800	149089000	189021500	85574510	88314220	148596200	158527200	116137600	96632910	118546000	105503300	82973350	133541700	112738100	166502700	137330400	159957400	126423700	174927400	146140300	167734600	74911820	69851970	209669400	105231200	101994200	117865400	95548660	155583000	152149300	132480000	-0.051	-0.671	0.868836	0.894642	0.515816
Cct4	120755900	108182400	192136300	146820000	66322370	127137000	109663900	167630100	124747000	177386400	72908100	66353110	110753900	125616800	86421280	110698800	80234520	95398030	67137670	123109100	81374820	116180700	114420300	136154600	108208100	137220700	131062200	152691200	67933010	64227800	161958600	92906310	78800190	98968660	119405500	96006740	115040800	158235700	-0.006	-0.0631	1	0.843367	0.811665
Cct5	152458400	123587100	276062000	182146100	104278600	144498500	130005100	239030500	164663200	216777800	103883000	95646490	196157300	181824400	119457700	126453700	118917800	136939600	114652700	142494800	109560000	167940300	143327100	154143200	132165300	185614100	169370200	179868200	103753700	89177320	274486100	129735000	133313200	112933800	149539500	146315700	176087100	205995600	-0.04	-0.5734	0.939431	0.894107	0.581034
Cct6a	101073600	78171040	144170200	89751370	50226450	100109200	79666220	130477000	82369920	120124600	37484530	49387050	94027150	81030580	42948300	61825310	55903860	53647430	46396050	84577470	64280290	88311690	73227880	110425100	83466490	104462600	89276080	90778400	35728460	43444010	123355300	50833780	51725600	42676190	67242210	74973450	72006520	85941350	-0.044	-0.4956	0.978586	0.891347	0.630395
Cct3	259230300	233110700	535081900	298514900	191580600	258982200	209757400	447932600	253753600	360075500	201648100	185949400	400750300	385042200	267381700	276089300	278894100	312447300	251258500	265942900	185623900	285746100	259155800	288510900	243311000	334580700	281278600	255136500	193512400	157819700	423167700	293256700	207553100	280674000	312790500	386416100	425469200	402323300	-0.051	-0.6544	0.882285	0.894773	0.527049
Stim2	526090	708065	691078	622642	583554	516545	375377	1305791	607961	530410	200609	352002	1064148	1350718	525184	494804	759122	542965	844566	505787	782438	897075	838189	376063	425929	689070	637393	371524	253136	306824	1116859	731493	537747	98524.2	412306	1693029	1229458	738277	-0.107	-0.8394	0.711358	0.888949	0.402775
Eloc	47118.9	170330	262734	294230	22195.7	15613.9	189231	109450	153196	249602	66572.8	35160.9	172879	83892.8	0	0	36485.5	21197.9	34475.5	11624	96094.5	130456	45281.1	96196	114006	295571	284745	195356	22896	80218.7	121054	68103.2	12244.5	25661	0	5778.87	19775.8	24760.5	-0.211	-0.5282	0.9642	0.892758	0.610113
Arf5	32339880	39151090	55620390	53902670	29845890	37530450	38836970	48783820	37353060	59994370	23580390	29333240	46828810	54446690	36354790	37513760	43853760	37597050	37479630	25030280	33230240	60392490	41792290	32846060	38412040	47413850	54822920	37224340	22973950	35644610	36994300	33545910	29594070	31296740	29763060	70519550	69183430	43893510	-0.035	-0.5869	0.930987	0.894372	0.572173
Ap2m1	134410200	103985000	251276700	199781000	218346200	102008800	98111240	216445300	169828300	205498700	87809500	169886800	242318200	414069300	111483500	186516200	228588100	249182100	210117000	148106200	108567500	216161200	203920400	86001480	123036400	158583200	182140100	168722800	201894800	215247100	291185300	248195300	252101900	87503930	123202400	293425500	244437200	313825900	-0.007	-0.0626	1	0.843274	0.811788
Rhog	7818297	9783532	9514687	5743287	8567859	4281389	3844533	10116210	11361590	5148683	3528807	6562049	12528280	8813772	3955469	3705357	4417726	3887622	7857401	4976650	5035140	13075490	9295743	4444304	3906736	8845862	5309479	5608208	2171382	5119006	11934750	5355874	6705664	1632470	3442170	9456614	8188335	2862677	-0.174	-1.4151	0.241448	0.85086	0.113689
Rpl19	9469352	118820900	109257700	121534500	234089500	38954200	106249100	267236100	169636000	207416400	24243560	128930400	236851700	459658700	61475900	83323830	240958800	214967400	241636500	20833180	161535200	241599900	209006100	31177490	110399900	231240700	275556900	207342100	23892100	159432400	194458900	279566100	298190000	29262150	108371700	221334900	237720300	269030200	0.084	0.3289	0.980739	0.72261	0.872217
Hist2h3c2	202330200	178400500	221129400	305204200	80917940	144899900	98784430	263657200	93639670	132288700	109665900	75802660	220197100	176682800	78999960	139278400	131840700	166089300	96640660	457629400	139753900	595600100	103248900	171039400	146010800	188129500	197679400	148075300	322400100	84628370	285374200	181213700	92510960	59939000	148667600	358412600	221915000	211110900	0.241	1.7622	0.07278	0.026689	0.838124
H3f3b	202330200	178400500	221129400	305204200	80917940	144899900	98784430	263657200	93639670	132288700	109665900	75802660	220197100	176682800	78999960	139278400	131840700	166089300	96640660	457629400	139753900	595600100	103248900	171039400	146010800	188129500	197679400	148075300	322400100	84628370	285374200	181213700	92510960	59939000	148667600	358412600	221915000	211110900	0.244	1.8423	0.049979	0.018792	0.836346
Isoc2a	323598100	224702700	154330500	125758900	27677100	241835500	132135500	116888500	93236900	70269820	165638000	141152900	85462590	74873500	137670100	93628360	65892100	83013900	31584120	344924900	163364800	93095630	62238730	348598100	158290300	133261700	150310900	79415840	206494700	72963280	124884400	70770080	35124830	132478900	96297270	94712450	86801280	39858730	0.009	0.0397	1	0.821588	0.833985
Serping1	87924120	49507080	29954720	65353160	62775210	77012450	85882120	65390920	77476700	78281320	14134610	27144030	44230940	54739080	24354330	39307310	56214010	42860030	63080180	36184070	36369760	77892940	52881160	64175640	75805160	86499410	83410690	64271540	8487823	31292930	52606780	37685750	37401690	12649900	22372320	81693070	61061180	48387310	-0.127	-0.8604	0.690223	0.887783	0.389145
Serpinf1	3357273	2313237	1991153	6277851	2886129	2924278	2321927	2730017	2508662	5606663	2055375	3651320	5534334	5102301	4126320	2513506	1418479	4359620	1727172	4155536	2757455	4774154	2285402	3573572	2141791	3399317	4566140	1871172	3402464	2728857	2365655	5603155	3126775	3306283	3138160	3226080	3469973	2414044	0.021	0.1637	1	0.786743	0.854279
Nptn	205226	780820	1158308	394264	816765	473130	178332	889823	284720	209485	268213	527423	732695	1390837	611243	578848	840460	645251	1356690	316374	395985	853593	353961	394107	224048	375012	636700	240690	978424	1040581	622610	701321	366789	398734	413115	1882314	661229	913342	-0.059	-0.307	1	0.877046	0.730299
Csrp1	705880	471235	7222323	831744	191377	168585	260515	184990	123043	533363	32551.6	200516	186922	222228	178932	160128	210820	205351	8562950	339759	341388	467705	311803	433956	353706	252128	369150	304880	1655769	451865	420541	87852.3	7823862	103235	126171	181241	2875754	1708930	0.303	0.7809	0.771047	0.453301	0.879527
St3gal3	284802	428665	1329663	922133	1593577	602656	925861	1336952	1315241	843987	572430	717140	1631988	1878410	907131	819074	1754391	1484072	2153052	564638	666528	1273737	536919	368980	1145435	1261273	1535427	521812	466082	662916	1598308	1346100	1512971	606353	755810	2217710	2269179	1436109	-0.066	-0.3815	1	0.883737	0.695037
Khk	54998850	63905560	76931910	42018520	39145460	33322460	51999100	61993270	31152850	69276840	39125140	37313180	52797210	100219200	21165280	42823050	47609320	57144910	33935960	42298790	48989830	54484240	43030150	52480610	36404280	52357960	56555680	59385930	27185520	51623700	53669520	69544650	45674490	50760160	36182210	52155250	63090640	76020530	0.037	0.4586	0.945532	0.657916	0.879688
Nrp1	439077	504820	798956	283232	298163	558605	271304	267974	487026	954338	194594	319289	235169	371833	656215	583319	263687	330503	391287	931730	289981	480388	236461	508960	290914	387800	650057	359213	530203	376482	523548	194408	352788	274273	279728	538529	441272	280375	-0.018	-0.1214	1	0.853428	0.796263
Rhod	2358653	3073233	2775518	3054801	2356900	1661843	2492587	3529292	1577596	1264341	1672831	2407750	3710604	7110757	1637619	3387740	2791849	3802423	3527544	2785822	2180511	1648193	1898708	1761196	2338442	2807976	1896426	1872325	2873693	3460013	2410395	3030900	2367170	1875871	3177442	5623728	4676818	3405869	-0.013	-0.1057	1	0.850863	0.800628
Rps3a	38774210	98289900	104354900	54258050	49836430	36959540	47168770	103131100	42030520	85263240	4973241	31396280	49077850	77877380	7513043	27200920	42185770	37721180	30453210	55347590	57419500	57195000	71625200	42076320	42421670	92854510	78358720	115450800	10751880	46557820	64258620	45951850	52198100	3487041	14642160	46666470	47177990	59427670	0.048	0.2558	0.992928	0.753544	0.865514
Sptlc2	949814	1739413	2150142	2171837	2030453	861236	1168289	2270675	1825176	1419901	576536	1172044	2660349	3289547	754441	1231517	3022241	1646466	4611713	640762	1839115	3436359	2806804	741530	1649479	1873785	1988422	1834100	629628	2040769	2239638	2749748	1866949	391180	1300138	4791352	5623827	1799794	0.032	0.1884	0.999087	0.778468	0.857606
Sephs2	23575570	27275420	13189800	25869410	6616934	14080830	30006990	18720440	21737150	42571450	6679673	9087474	8209823	14550900	3666812	7388293	4713119	8104829	2792640	20048420	21302500	19035880	12201970	19665310	21463420	23115790	30859540	33494090	4257421	6852662	14696950	9848391	9470059	3043248	5529706	4811495	7120359	8590164	-0.015	-0.0742	1	0.845399	0.808899
Atp1b3	77112710	114487900	129497000	105037000	136353500	66416450	90359260	95100500	79991390	85638520	67176750	119398700	136554900	219463300	95158050	130121300	124218100	116385000	131524600	79322850	88726210	114110200	84528080	46937380	66508170	81450890	73095020	72555060	82203500	150337600	127619800	121995000	122209700	72894580	94942330	190244900	164688500	174180800	-0.096	-0.9434	0.606673	0.882514	0.337092
Psme1	46406290	67015790	104746100	80658570	66169340	33931190	57110040	73998370	28427810	65169370	42813180	42042470	92208160	89944030	30747960	44594370	56457840	50665340	57223640	46446510	47006280	78960760	63008460	42945190	31601500	46595450	52126910	84206740	29483580	44486440	145108100	58536460	52233020	39559730	26353010	81268480	95573950	78281750	-0.036	-0.349	1	0.880981	0.711112
Psme2	42558080	39967590	50740660	45584160	35981710	21717490	31047140	33262030	26992580	36592350	19591990	26244730	49441300	47971050	20530900	22160190	35764650	34999600	35078470	32442130	31229500	58188130	33311560	28143030	26286290	25807000	42433690	40179180	22906470	28256070	74987530	35346240	26030900	23690240	17818270	45155610	54617690	40515450	0.021	0.2973	0.986723	0.736479	0.869553
G3bp2	1900318	286374	2790531	401364	249539	261153	515724	713692	458087	555886	2538116	1688976	1463973	785917	584024	439381	484803	276701	2856520	1514374	1224444	405850	3076640	1453870	203481	340511	614477	1059374	129235	671950	1451570	226094	508388	2171959	1858972	1989669	2414392	590830	0.155	0.4887	0.935024	0.641173	0.880696
[truncated: 2,197 more rows]

## Sheet: Sort
Supplemental Table 5.Qprot statistics on Sedentary samples vs Exercise samples. A protein is considering changing if Z_score >1.5 and FDR <0.05 (high in exercise and low in sedentary) or Z_score <-1.5 and FDR < 0.05 (high in sedentary and low in exercise).
[truncated: 3,242 more rows]

## Sheet: Sheet1
Protein
Mapk9
Pcmt1
Stat5b
Rbbp9
Atp9a
Mrpl47
[truncated: 87 more rows]
