# Supplementary material for: Acute exercise dynamically modulates the hepatic mitochondrial proteome
Source: Royal Society of Chemistry journal article supplement (doi:10.1039/d2mo00143h), 2022-07-29
Supplement: d2mo00143h6.xlsx [file d2mo00143h6.xlsx]

## Sheet: Annotation
Supplemental Table 6.Enrichemnt analysis on proteins that changed between sedentary and exercise data.
MyList	Gene ID	Type	Tax ID	Homologene Gene ID	Homologene Gene Tax ID	Gene Symbol	Description	Biological Process (GO)	GO:0010876 lipid localization	WP151 IL-5 signaling pathway	GO:0023061 signal release	GO:0001934 positive regulation of protein	GO:0120192 tight junction assembly	GO:0048732 gland development	R-MMU-9006931 Signaling by Nuclear Receptors	GO:0050730 regulation of peptidyl-tyrosin	GO:0046628 positive regulation of insulin	GO:0043254 regulation of protein-containi	GO:0045931 positive regulation of mitotic	ko05100 Bacterial invasion of epitheli	R-MMU-6798695 Neutrophil degranulation	GO:0045920 negative regulation of exocyto	ko04666 Fc gamma R-mediated phagocytos	ko04975 Fat digestion and absorption	GO:0007431 salivary gland development	GO:0016050 vesicle organization	GO:0070848 response to growth factor	GO:0001954 positive regulation of cell-ma
Mapk9	26420	symbol	M. musculus	26420	M. musculus	Mapk9	mitogen-activated protein kinase 9	GO:0061833 protein localization to tricellular tight junction;GO:0007258 JUN phosphorylation;GO:0036369 transcription factor catabolic process	1	1	1	1	1	0	1	0	0	1	0	0	0	0	0	0	0	0	0	0
Pcmt1	18537	symbol	M. musculus	18537	M. musculus	Pcmt1	protein-L-isoaspartate (D-aspartate) O-methyltransferase 1	GO:0046498 S-adenosylhomocysteine metabolic process;GO:0046500 S-adenosylmethionine metabolic process;GO:0046128 purine ribonucleoside metabolic process	0	0	0	0	0	0	0	0	0	0	0	0	0	0	0	0	0	0	0	0
Stat5b	20851	symbol	M. musculus	20851	M. musculus	Stat5b	signal transducer and activator of transcription 5B	GO:0046544 development of secondary male sexual characteristics;GO:0060397 growth hormone receptor signaling pathway via JAK-STAT;GO:0032819 positive regulation of natural killer cell proliferation	1	1	0	0	1	1	1	1	1	0	1	0	0	0	0	0	0	0	1	0
Rbbp9	26450	symbol	M. musculus	26450	M. musculus	Rbbp9	retinoblastoma binding protein 9, serine hydrolase	GO:0042127 regulation of cell population proliferation;GO:0008283 cell population proliferation;GO:0050794 regulation of cellular process	0	0	0	0	0	0	0	0	0	0	0	0	0	0	0	0	0	0	0	0
Atp9a	11981	symbol	M. musculus	11981	M. musculus	Atp9a	ATPase, class II, type 9A	GO:1903542 negative regulation of exosomal secretion;GO:1905279 regulation of retrograde transport, endosome to Golgi;GO:1903541 regulation of exosomal secretion	1	0	1	0	0	0	0	0	0	0	0	1	0	1	0	0	0	1	0	0
Mrpl47	74600	symbol	M. musculus	74600	M. musculus	Mrpl47	mitochondrial ribosomal protein L47	GO:0032543 mitochondrial translation;GO:0140053 mitochondrial gene expression;GO:0006412 translation	0	0	0	0	0	0	0	0	0	0	0	0	0	0	0	0	0	0	0	0
Dhrs13	70451	symbol	M. musculus	70451	M. musculus	Dhrs13	dehydrogenase/reductase (SDR family) member 13	GO:0042574 retinal metabolic process;GO:0001523 retinoid metabolic process;GO:0006081 cellular aldehyde metabolic process	0	0	0	0	0	0	0	0	0	0	0	0	0	0	0	0	0	0	0	0
Fndc3b	72007	symbol	M. musculus	72007	M. musculus	Fndc3b	fibronectin type III domain containing 3B	GO:0060510 type II pneumocyte differentiation;GO:0061140 lung secretory cell differentiation;GO:0060487 lung epithelial cell differentiation	0	1	0	0	1	0	0	0	0	0	0	0	0	0	0	0	0	0	0	0
Mov10	17454	symbol	M. musculus	17454	M. musculus	Mov10	Mov10 RISC complex RNA helicase	GO:0010525 regulation of transposition, RNA-mediated;GO:0010526 negative regulation of transposition, RNA-mediated;GO:0032197 transposition, RNA-mediated	0	0	0	0	0	0	0	0	0	0	0	0	0	0	0	0	0	0	0	0
Clcn2	12724	symbol	M. musculus	12724	M. musculus	Clcn2	chloride channel, voltage-sensitive 2	GO:0060689 cell differentiation involved in salivary gland development;GO:0032347 regulation of aldosterone biosynthetic process;GO:0032344 regulation of aldosterone metabolic process	1	0	0	0	0	1	0	0	0	0	0	0	0	0	0	0	1	0	0	0
Tdrkh	72634	symbol	M. musculus	72634	M. musculus	Tdrkh	tudor and KH domain containing protein	GO:0043046 DNA methylation involved in gamete generation;GO:0034587 piRNA metabolic process;GO:0007140 male meiotic nuclear division	0	0	0	0	0	0	0	0	0	0	0	0	0	0	0	0	0	0	0	0
Atg7	74244	symbol	M. musculus	74244	M. musculus	Atg7	autophagy related 7	GO:0090298 negative regulation of mitochondrial DNA replication;GO:0039689 negative stranded viral RNA replication;GO:2000619 negative regulation of histone H4-K16 acetylation	0	1	1	0	0	1	0	0	0	0	0	0	1	1	0	0	0	0	0	1
Stxbp1	20910	symbol	M. musculus	20910	M. musculus	Stxbp1	syntaxin binding protein 1	GO:0106022 positive regulation of vesicle docking;GO:2000367 regulation of acrosomal vesicle exocytosis;GO:0007412 axon target recognition	0	1	1	0	0	1	0	0	0	1	0	0	0	1	0	0	0	1	0	0
Mapk1	26413	symbol	M. musculus	26413	M. musculus	Mapk1	mitogen-activated protein kinase 1	GO:0019858 cytosine metabolic process;GO:0015960 diadenosine polyphosphate biosynthetic process;GO:0015965 diadenosine tetraphosphate metabolic process	0	1	1	1	0	1	1	0	1	0	0	1	1	1	1	0	0	0	1	0
Snap29	67474	symbol	M. musculus	67474	M. musculus	Snap29	synaptosomal-associated protein 29	GO:0016240 autophagosome membrane docking;GO:0098693 regulation of synaptic vesicle cycle;GO:0031629 synaptic vesicle fusion to presynaptic active zone membrane	0	1	1	0	0	0	0	0	0	0	0	0	1	1	0	0	0	1	0	0
Ubxn4	67812	symbol	M. musculus	67812	M. musculus	Ubxn4	UBX domain protein 4	GO:0030433 ubiquitin-dependent ERAD pathway;GO:0036503 ERAD pathway;GO:0006986 response to unfolded protein	0	0	0	0	0	0	0	0	0	0	0	0	0	0	0	0	0	0	0	0
Tex2	21763	symbol	M. musculus	21763	M. musculus	Tex2	testis expressed gene 2	GO:0006869 lipid transport;GO:0010876 lipid localization;GO:0071702 organic substance transport	1	0	0	0	0	0	1	0	0	0	0	0	0	0	0	0	0	0	0	0
Uqcr10	66152	symbol	M. musculus	66152	M. musculus	Uqcr10	ubiquinol-cytochrome c reductase, complex III subunit X	GO:0006122 mitochondrial electron transport, ubiquinol to cytochrome c;GO:0019646 aerobic electron transport chain;GO:0042775 mitochondrial ATP synthesis coupled electron transport	0	0	0	0	0	0	0	0	0	0	0	0	0	0	0	0	0	0	0	0
Kras	16653	symbol	M. musculus	16653	M. musculus	Kras	Kirsten rat sarcoma viral oncogene homolog	GO:0038002 endocrine signaling;GO:0021896 forebrain astrocyte differentiation;GO:0021897 forebrain astrocyte development	0	1	0	1	0	0	1	0	0	0	0	0	0	0	0	0	0	0	0	0
Tnpo1	238799	symbol	M. musculus	238799	M. musculus	Tnpo1	transportin 1	GO:0006606 protein import into nucleus;GO:0051170 import into nucleus;GO:0017038 protein import	0	0	0	0	0	0	0	0	0	0	0	1	0	0	0	0	0	0	0	0
Man2c1	73744	symbol	M. musculus	73744	M. musculus	Man2c1	mannosidase, alpha, class 2C, member 1	GO:0009313 oligosaccharide catabolic process;GO:0006013 mannose metabolic process;GO:0009311 oligosaccharide metabolic process	0	0	0	0	0	0	0	0	0	0	0	0	0	0	0	0	0	0	0	0
Atp7b	11979	symbol	M. musculus	11979	M. musculus	Atp7b	ATPase, Cu++ transporting, beta polypeptide	GO:0015680 protein maturation by copper ion transfer;GO:0060003 copper ion export;GO:0035434 copper ion transmembrane transport	1	1	0	0	0	1	0	0	0	0	0	0	0	0	0	0	0	0	1	0
Kank2	235041	symbol	M. musculus	235041	M. musculus	Kank2	KN motif and ankyrin repeat domains 2	GO:0070563 negative regulation of vitamin D receptor signaling pathway;GO:0090521 glomerular visceral epithelial cell migration;GO:0070562 regulation of vitamin D receptor signaling pathway	0	0	0	0	0	0	0	0	1	0	1	0	0	0	0	1	0	0	0	0
Fuca2	66848	symbol	M. musculus	66848	M. musculus	Fuca2	fucosidase, alpha-L- 2, plasma	GO:2000535 regulation of entry of bacterium into host cell;GO:0035635 entry of bacterium into host cell;GO:0006004 fucose metabolic process	0	0	0	0	0	0	0	0	0	0	0	0	1	0	0	0	0	0	0	0
Micu2	68514	symbol	M. musculus	68514	M. musculus	Micu2	mitochondrial calcium uptake 2	GO:0051562 negative regulation of mitochondrial calcium ion concentration;GO:0051561 positive regulation of mitochondrial calcium ion concentration;GO:0036444 calcium import into the mitochondrion	1	0	0	0	0	0	0	0	0	0	0	0	0	0	0	0	0	0	0	0
Cubn	65969	symbol	M. musculus	65969	M. musculus	Cubn	cubilin (intrinsic factor-cobalamin receptor)	GO:0042366 cobalamin catabolic process;GO:0020028 endocytic hemoglobin import into cell;GO:0042365 water-soluble vitamin catabolic process	0	0	0	0	0	0	0	0	0	0	0	1	0	0	0	1	0	0	0	0
Atpaf1	230649	symbol	M. musculus	230649	M. musculus	Atpaf1	ATP synthase mitochondrial F1 complex assembly factor 1	GO:0033615 mitochondrial proton-transporting ATP synthase complex assembly;GO:0043461 proton-transporting ATP synthase complex assembly;GO:0070071 proton-transporting two-sector ATPase complex assembly	0	0	0	0	0	0	0	0	0	0	0	0	0	0	0	0	0	0	0	0
Slc27a4	26569	symbol	M. musculus	26569	M. musculus	Slc27a4	solute carrier family 27 (fatty acid transporter), member 4	GO:0062002 regulation of all-trans-retinyl-ester hydrolase, 11-cis retinol forming activity;GO:0062003 negative regulation of all-trans-retinyl-ester hydrolase, 11-cis retinol forming activity;GO:0001579 medium-chain fatty acid transport	1	0	0	0	0	0	0	0	1	0	0	0	0	0	0	1	0	0	0	0
Mrpl41	107733	symbol	M. musculus	107733	M. musculus	Mrpl41	mitochondrial ribosomal protein L41	GO:0006412 translation;GO:0043043 peptide biosynthetic process;GO:0043604 amide biosynthetic process	0	0	0	0	0	0	0	0	0	0	0	0	0	0	0	0	0	0	0	0
H3f3b	15081	symbol	M. musculus	15081	M. musculus	H3f3b	H3.3 histone B	GO:1902340 negative regulation of chromosome condensation;GO:0031509 subtelomeric heterochromatin assembly;GO:0140461 subtelomeric heterochromatin organization	0	1	0	0	0	0	1	0	0	1	0	0	0	0	0	0	0	0	1	0
Smpd2	20598	symbol	M. musculus	20598	M. musculus	Smpd2	sphingomyelin phosphodiesterase 2, neutral	GO:0006685 sphingomyelin catabolic process;GO:0006684 sphingomyelin metabolic process;GO:0030149 sphingolipid catabolic process	0	1	0	0	0	0	0	1	0	0	0	0	0	0	0	0	0	0	0	0
Hint3	66847	symbol	M. musculus	66847	M. musculus	Hint3	histidine triad nucleotide binding protein 3		0	0	0	0	0	0	0	0	0	0	0	0	0	0	0	0	0	0	0	0
Fggy	75578	symbol	M. musculus	75578	M. musculus	Fggy	FGGY carbohydrate kinase domain containing	GO:0019321 pentose metabolic process;GO:0046835 carbohydrate phosphorylation;GO:0070050 neuron cellular homeostasis	0	0	0	0	0	0	0	0	0	0	0	0	0	0	0	0	0	0	0	0
Hist1h3i	319153	gene_synonym	M. musculus	319153	M. musculus	H3c11	H3 clustered histone 11		0	1	0	0	0	0	1	0	0	0	0	0	0	0	0	0	0	0	0	0
Mpdz	17475	symbol	M. musculus	17475	M. musculus	Mpdz	multiple PDZ domain crumbs cell polarity complex component	GO:0120192 tight junction assembly;GO:0120193 tight junction organization;GO:0031023 microtubule organizing center organization	0	1	0	0	1	0	0	0	0	0	0	0	0	0	0	0	0	0	0	0
Cmas	12764	symbol	M. musculus	12764	M. musculus	Cmas	cytidine monophospho-N-acetylneuraminic acid synthetase	GO:0006055 CMP-N-acetylneuraminate biosynthetic process;GO:0046381 CMP-N-acetylneuraminate metabolic process;GO:0009226 nucleotide-sugar biosynthetic process	0	0	0	0	0	0	0	0	0	0	0	0	0	0	0	0	0	0	0	0
Mrps5	77721	symbol	M. musculus	77721	M. musculus	Mrps5	mitochondrial ribosomal protein S5	GO:0006412 translation;GO:0043043 peptide biosynthetic process;GO:0043604 amide biosynthetic process	0	0	0	0	0	0	0	0	0	0	0	0	0	0	0	0	0	0	0	0
Hist2h3c2	97114	gene_synonym	M. musculus	97114	M. musculus	H3c15	H3 clustered histone 15		0	0	0	0	0	0	1	0	0	0	0	0	0	0	0	0	0	0	0	0
Alg12	223774	symbol	M. musculus	223774	M. musculus	Alg12	asparagine-linked glycosylation 12 (alpha-1,6-mannosyltransferase)	GO:0006488 dolichol-linked oligosaccharide biosynthetic process;GO:0006490 oligosaccharide-lipid intermediate biosynthetic process;GO:0006487 protein N-linked glycosylation	0	0	0	0	0	0	0	0	0	0	0	0	0	0	0	0	0	0	0	0
Gtpbp8	66067	symbol	M. musculus	66067	M. musculus	Gtpbp8	GTP-binding protein 8 (putative)	GO:0008150 biological_process	0	0	0	0	0	0	0	0	0	0	0	0	0	0	0	0	0	0	0	0
Hist1h1e	50709	gene_synonym	M. musculus	50709	M. musculus	H1f4	H1.4 linker histone, cluster member	GO:0098532 histone H3-K27 trimethylation;GO:0031936 negative regulation of chromatin silencing;GO:0016584 nucleosome positioning	0	0	0	0	0	0	0	0	0	0	0	0	0	0	0	0	0	0	0	0
Osbpl8	237542	symbol	M. musculus	237542	M. musculus	Osbpl8	oxysterol binding protein-like 8	GO:0090204 protein localization to nuclear pore;GO:0010891 negative regulation of sequestering of triglyceride;GO:0090435 protein localization to nuclear envelope	1	0	0	1	0	0	0	0	1	0	0	1	0	0	0	0	0	0	0	0
Ppic	19038	symbol	M. musculus	19038	M. musculus	Ppic	peptidylprolyl isomerase C	GO:0000413 protein peptidyl-prolyl isomerization;GO:0018208 peptidyl-proline modification;GO:0006457 protein folding	0	0	0	0	0	0	0	0	0	0	0	0	0	0	0	0	0	0	0	0
Vps4b	20479	symbol	M. musculus	20479	M. musculus	Vps4b	vacuolar protein sorting 4B	GO:1904896 ESCRT complex disassembly;GO:1904903 ESCRT III complex disassembly;GO:0061738 late endosomal microautophagy	1	0	1	0	0	0	0	0	0	0	1	0	0	1	0	0	0	1	0	0
Epha2	13836	symbol	M. musculus	13836	M. musculus	Epha2	Eph receptor A2	GO:0060034 notochord cell differentiation;GO:0060035 notochord cell development;GO:0048320 axial mesoderm formation	0	1	0	1	1	1	1	0	1	0	0	1	0	0	0	0	1	0	1	1
Ociad2	433904	symbol	M. musculus	433904	M. musculus	Ociad2	OCIA domain containing 2	GO:0009617 response to bacterium;GO:0051707 response to other organism;GO:0043207 response to external biotic stimulus	0	0	0	0	0	0	0	0	0	0	0	0	0	0	0	0	0	0	0	0
Bdh2	69772	symbol	M. musculus	69772	M. musculus	Bdh2	3-hydroxybutyrate dehydrogenase, type 2	GO:0009237 siderophore metabolic process;GO:0019290 siderophore biosynthetic process;GO:0019184 nonribosomal peptide biosynthetic process	0	0	0	0	1	0	0	0	0	0	0	0	0	0	0	0	0	0	0	0
Psmd9	67151	symbol	M. musculus	67151	M. musculus	Psmd9	proteasome (prosome, macropain) 26S subunit, non-ATPase, 9	GO:0070682 proteasome regulatory particle assembly;GO:0097050 type B pancreatic cell apoptotic process;GO:0043248 proteasome assembly	1	1	1	0	0	0	1	0	0	0	0	0	0	0	0	0	0	0	0	0
Copg2	54160	symbol	M. musculus	54160	M. musculus	Copg2	coatomer protein complex, subunit gamma 2	GO:0006891 intra-Golgi vesicle-mediated transport;GO:0072384 organelle transport along microtubule;GO:0006888 endoplasmic reticulum to Golgi vesicle-mediated transport	0	0	1	0	0	0	0	0	0	0	0	0	0	0	0	0	0	0	0	0
Vps25	28084	symbol	M. musculus	28084	M. musculus	Vps25	vacuolar protein sorting 25	GO:0043328 protein transport to vacuole involved in ubiquitin-dependent protein catabolic process via the multivesicular body sorting pathway;GO:0007175 negative regulation of epidermal growth factor-activated receptor activity;GO:0032511 late endosome to vacuole transport via multivesicular body sorting pathway	0	1	0	0	0	0	0	1	1	0	0	0	0	0	0	0	0	1	0	1
Acly	104112	symbol	M. musculus	104112	M. musculus	Acly	ATP citrate lyase	GO:0006101 citrate metabolic process;GO:0006107 oxaloacetate metabolic process;GO:0072350 tricarboxylic acid metabolic process	0	0	0	0	0	0	0	0	0	0	0	0	1	0	0	0	0	0	0	0
Cd300a	217303	symbol	M. musculus	217303	M. musculus	Cd300a	CD300A molecule	GO:0002552 serotonin secretion by mast cell;GO:1902567 negative regulation of eosinophil activation;GO:1902569 negative regulation of activation of Janus kinase activity	0	1	1	1	0	0	0	1	0	0	0	1	1	1	0	0	0	1	0	1
Lin7a	108030	symbol	M. musculus	108030	M. musculus	Lin7a	lin-7 homolog A, crumbs cell polarity complex component	GO:1903361 protein localization to basolateral plasma membrane;GO:0045199 maintenance of epithelial cell apical/basal polarity;GO:0035090 maintenance of apical/basal cell polarity	0	0	1	0	0	0	0	0	0	0	0	0	0	1	0	0	0	0	0	0
Osbp	76303	symbol	M. musculus	76303	M. musculus	Osbp	oxysterol binding protein	GO:1904409 regulation of secretory granule organization;GO:1904411 positive regulation of secretory granule organization;GO:0032366 intracellular sterol transport	1	0	1	1	0	0	0	1	0	0	0	0	0	0	0	0	0	1	0	0
Eva1a	232146	symbol	M. musculus	232146	M. musculus	Eva1a	eva-1 homolog A (C. elegans)	GO:0006914 autophagy;GO:0061919 process utilizing autophagic mechanism;GO:0006915 apoptotic process	0	0	0	0	0	0	0	0	0	0	0	0	0	0	0	0	0	0	0	0
Slc22a27	171405	symbol	M. musculus	171405	M. musculus	Slc22a27	solute carrier family 22, member 27	GO:0015711 organic anion transport;GO:0006820 anion transport;GO:0055085 transmembrane transport	0	0	0	0	0	0	0	0	0	0	0	0	0	0	0	0	0	0	0	0
Cotl1	72042	symbol	M. musculus	72042	M. musculus	Cotl1	coactosin-like 1 (Dictyostelium)	GO:0050832 defense response to fungus;GO:0009620 response to fungus;GO:0030833 regulation of actin filament polymerization	0	0	0	0	0	0	0	0	0	1	0	0	1	0	0	0	0	0	0	0
Atp8a1	11980	symbol	M. musculus	11980	M. musculus	Atp8a1	ATPase, aminophospholipid transporter (APLT), class I, type 8A, member 1	GO:0140331 aminophospholipid translocation;GO:0015917 aminophospholipid transport;GO:0061092 positive regulation of phospholipid translocation	1	0	0	0	0	0	0	0	0	0	0	0	1	0	0	0	0	0	1	0
Krt17	16667	symbol	M. musculus	16667	M. musculus	Krt17	keratin 17	GO:0051798 positive regulation of hair follicle development;GO:0051797 regulation of hair follicle development;GO:0042634 regulation of hair cycle	0	1	0	0	1	0	0	0	0	0	0	0	0	0	0	0	0	0	1	0
Abca1	11303	symbol	M. musculus	11303	M. musculus	Abca1	ATP-binding cassette, sub-family A (ABC1), member 1	GO:0090108 positive regulation of high-density lipoprotein particle assembly;GO:0071403 cellular response to high density lipoprotein particle stimulus;GO:0090107 regulation of high-density lipoprotein particle assembly	1	0	1	0	0	0	1	0	0	1	0	0	0	0	0	1	0	1	0	0
Abcc6	27421	symbol	M. musculus	27421	M. musculus	Abcc6	ATP-binding cassette, sub-family C (CFTR/MRP), member 6	GO:0030505 inorganic diphosphate transport;GO:0071716 leukotriene transport;GO:0006855 drug transmembrane transport	1	1	0	0	0	0	0	0	0	0	0	0	0	0	0	0	0	0	0	0
Cpb2	56373	symbol	M. musculus	56373	M. musculus	Cpb2	carboxypeptidase B2 (plasma)	GO:0003331 positive regulation of extracellular matrix constituent secretion;GO:0051918 negative regulation of fibrinolysis;GO:2000346 negative regulation of hepatocyte proliferation	0	0	1	0	0	1	0	0	0	0	0	0	0	0	0	0	1	0	0	0
Ilk	16202	symbol	M. musculus	16202	M. musculus	Ilk	integrin linked kinase	GO:0032288 myelin assembly;GO:2000178 negative regulation of neural precursor cell proliferation;GO:0045663 positive regulation of myoblast differentiation	0	1	0	1	0	0	0	0	0	0	0	1	0	0	0	0	0	0	1	1
Pctp	18559	symbol	M. musculus	18559	M. musculus	Pctp	phosphatidylcholine transfer protein	GO:0120163 negative regulation of cold-induced thermogenesis;GO:0015914 phospholipid transport;GO:0015748 organophosphate ester transport	1	0	0	0	0	0	0	0	0	0	0	0	0	0	0	0	0	0	0	0
Pdia2	69191	symbol	M. musculus	69191	M. musculus	Pdia2	protein disulfide isomerase associated 2	GO:0006457 protein folding;GO:0034976 response to endoplasmic reticulum stress;GO:0033554 cellular response to stress	0	0	0	0	0	0	0	0	0	0	0	0	0	0	0	0	0	0	0	0
Mup6	620807	symbol	M. musculus	620807	M. musculus	Mup6	major urinary protein 6	GO:0008150 biological_process	0	0	0	0	0	0	0	0	0	0	0	0	0	0	0	0	0	0	0	0
Apex1	11792	symbol	M. musculus	11792	M. musculus	Apex1	apurinic/apyrimidinic endonuclease 1	GO:0097698 telomere maintenance via base-excision repair;GO:0043247 telomere maintenance in response to DNA damage;GO:0080111 DNA demethylation	0	1	0	0	0	0	0	0	0	0	1	1	0	0	0	0	0	0	0	0
Fbxl20	72194	symbol	M. musculus	72194	M. musculus	Fbxl20	F-box and leucine-rich repeat protein 20	GO:0099575 regulation of protein catabolic process at presynapse, modulating synaptic transmission;GO:0099171 presynaptic modulation of chemical synaptic transmission;GO:0031146 SCF-dependent proteasomal ubiquitin-dependent protein catabolic process	0	0	1	0	0	0	0	0	0	0	0	0	0	1	0	0	0	0	0	0
Egfr	13649	symbol	M. musculus	13649	M. musculus	Egfr	epidermal growth factor receptor	GO:0010750 positive regulation of nitric oxide mediated signal transduction;GO:1900019 regulation of protein kinase C activity;GO:1900020 positive regulation of protein kinase C activity	0	1	0	1	0	1	1	1	1	0	1	1	0	0	0	0	1	0	1	0
Septin8	20362	symbol	M. musculus	20362	M. musculus	Septin8	septin 8	GO:0035542 regulation of SNARE complex assembly;GO:0035493 SNARE complex assembly;GO:0061640 cytoskeleton-dependent cytokinesis	0	0	1	0	0	0	0	0	0	1	0	1	0	0	0	0	0	1	0	0
Marcks	17118	symbol	M. musculus	17118	M. musculus	Marcks	myristoylated alanine rich protein kinase C substrate	GO:0031584 activation of phospholipase D activity;GO:1905274 regulation of modification of postsynaptic actin cytoskeleton;GO:1900019 regulation of protein kinase C activity	0	0	0	1	0	0	0	0	1	0	0	0	0	0	1	0	0	0	0	0
Cyp2c38	13097	symbol	M. musculus	13097	M. musculus	Cyp2c38	cytochrome P450, family 2, subfamily c, polypeptide 38	GO:0019373 epoxygenase P450 pathway;GO:0042738 exogenous drug catabolic process;GO:0042737 drug catabolic process	0	0	0	0	0	0	0	0	0	0	0	0	0	0	0	0	0	0	0	0
Anxa5	11747	symbol	M. musculus	11747	M. musculus	Anxa5	annexin A5	GO:1902721 negative regulation of prolactin secretion;GO:0097210 response to gonadotropin-releasing hormone;GO:0097211 cellular response to gonadotropin-releasing hormone	0	1	1	0	0	1	1	0	1	0	0	0	0	0	0	0	0	0	0	0
Apcs	20219	symbol	M. musculus	20219	M. musculus	Apcs	amyloid P component, serum	GO:0044866 modulation by host of viral exo-alpha-sialidase activity;GO:0044867 modulation by host of viral catalytic activity;GO:0044869 negative regulation by host of viral exo-alpha-sialidase activity	0	1	0	0	0	0	0	0	0	0	0	0	0	0	0	0	0	0	0	0
Serpina1e	20704	symbol	M. musculus	20704	M. musculus	Serpina1e	serine (or cysteine) peptidase inhibitor, clade A, member 1E	GO:0033986 response to methanol;GO:0046687 response to chromate;GO:1900003 regulation of serine-type endopeptidase activity	0	1	0	0	0	0	0	0	1	0	0	0	0	0	0	0	0	0	0	0
Dmd	13405	symbol	M. musculus	13405	M. musculus	Dmd	dystrophin, muscular dystrophy	GO:0021627 olfactory nerve morphogenesis;GO:0021629 olfactory nerve structural organization;GO:0014809 regulation of skeletal muscle contraction by regulation of release of sequestered calcium ion	0	1	0	0	1	0	0	0	0	0	0	0	0	0	0	0	0	0	1	1
Marcksl1	17357	symbol	M. musculus	17357	M. musculus	Marcksl1	MARCKS-like 1	GO:0007015 actin filament organization;GO:0030036 actin cytoskeleton organization;GO:0097435 supramolecular fiber organization	0	0	0	0	0	0	0	0	0	0	0	0	0	0	1	0	0	0	0	0
Snx6	72183	symbol	M. musculus	72183	M. musculus	Snx6	sorting nexin 6	GO:1904646 cellular response to amyloid-beta;GO:0071364 cellular response to epidermal growth factor stimulus;GO:1904645 response to amyloid-beta	0	1	0	0	0	0	0	0	1	0	0	0	0	0	0	0	0	1	1	0
Ywhah	22629	symbol	M. musculus	22629	M. musculus	Ywhah	tyrosine 3-monooxygenase/tryptophan 5-monooxygenase activation protein, eta polypeptide	GO:0006713 glucocorticoid catabolic process;GO:0050774 negative regulation of dendrite morphogenesis;GO:0042921 glucocorticoid receptor signaling pathway	0	1	0	0	0	0	1	0	1	0	1	1	0	0	0	0	0	0	0	0
Brap	72399	symbol	M. musculus	72399	M. musculus	Brap	BRCA1 associated protein	GO:0007265 Ras protein signal transduction;GO:0007264 small GTPase mediated signal transduction;GO:0016567 protein ubiquitination	0	1	0	0	0	0	0	0	0	0	0	0	0	0	0	0	0	0	0	0
Hcls1	15163	symbol	M. musculus	15163	M. musculus	Hcls1	hematopoietic cell specific Lyn substrate 1	GO:0030854 positive regulation of granulocyte differentiation;GO:0045651 positive regulation of macrophage differentiation;GO:0030852 regulation of granulocyte differentiation	0	1	1	1	0	0	0	1	1	1	0	1	0	0	0	0	0	0	0	0
Plpp3	67916	symbol	M. musculus	67916	M. musculus	Plpp3	phospholipid phosphatase 3	GO:0044328 canonical Wnt signaling pathway involved in positive regulation of endothelial cell migration;GO:0044329 canonical Wnt signaling pathway involved in positive regulation of cell-cell adhesion;GO:0044330 canonical Wnt signaling pathway involved in positive regulation of wound healing	0	1	0	1	0	0	0	1	0	0	0	0	0	0	1	1	0	0	1	1
Lbp	16803	symbol	M. musculus	16803	M. musculus	Lbp	lipopolysaccharide binding protein	GO:0045919 positive regulation of cytolysis;GO:0015920 lipopolysaccharide transport;GO:0060265 positive regulation of respiratory burst involved in inflammatory response	1	1	0	0	0	0	0	0	0	0	0	0	0	1	0	0	0	0	1	0
Clec4f	51811	symbol	M. musculus	51811	M. musculus	Clec4f	C-type lectin domain family 4, member f	GO:0051132 NK T cell activation;GO:0046631 alpha-beta T cell activation;GO:0042110 T cell activation	0	0	0	0	0	0	0	0	0	0	0	0	0	0	0	0	0	0	0	0
Adcy9	11515	symbol	M. musculus	11515	M. musculus	Adcy9	adenylate cyclase 9	GO:0006171 cAMP biosynthetic process;GO:0046058 cAMP metabolic process;GO:0009190 cyclic nucleotide biosynthetic process	0	1	0	0	0	0	0	0	0	0	0	0	0	0	0	0	0	0	0	0
Tbc1d9b	76795	symbol	M. musculus	76795	M. musculus	Tbc1d9b	TBC1 domain family, member 9B	GO:0090630 activation of GTPase activity;GO:0043547 positive regulation of GTPase activity;GO:0043087 regulation of GTPase activity	0	0	0	0	0	0	0	0	0	0	0	0	0	0	0	0	0	0	0	0
Cdh1	12550	symbol	M. musculus	12550	M. musculus	Cdh1	cadherin 1	GO:0035847 uterine epithelium development;GO:0035846 oviduct epithelium development;GO:0071680 response to indole-3-methanol	0	1	1	0	1	1	1	0	1	0	0	1	0	0	0	0	1	0	1	0
Serpinb6	20719	gene_synonym	M. musculus	20719	M. musculus	Serpinb6a	serine (or cysteine) peptidase inhibitor, clade B, member 6a	GO:0071470 cellular response to osmotic stress;GO:0006970 response to osmotic stress;GO:0010951 negative regulation of endopeptidase activity	0	1	0	0	0	0	1	0	0	0	0	0	1	0	0	0	0	0	1	0
Lsr	54135	symbol	M. musculus	54135	M. musculus	Lsr	lipolysis stimulated lipoprotein receptor	GO:1904274 tricellular tight junction assembly;GO:0061833 protein localization to tricellular tight junction;GO:0060856 establishment of blood-brain barrier	0	0	0	0	1	1	0	0	0	0	0	0	0	0	0	0	0	0	0	0
Fam129a	63913	gene_synonym	M. musculus	63913	M. musculus	Niban1	niban apoptosis regulator 1	GO:0045727 positive regulation of translation;GO:0034250 positive regulation of cellular amide metabolic process;GO:0034976 response to endoplasmic reticulum stress	0	0	0	1	0	0	0	0	0	0	0	1	0	0	0	0	0	0	0	1
Gm5571	434025	gene_synonym	M. musculus	434025	M. musculus	Igkv9-120	immunoglobulin kappa chain variable 9-120	GO:0002377 immunoglobulin production;GO:0002440 production of molecular mediator of immune response;GO:0006955 immune response	0	0	0	0	0	0	0	0	0	0	0	0	0	0	0	0	0	0	0	0
Cdh5	12562	symbol	M. musculus	12562	M. musculus	Cdh5	cadherin 5	GO:1902396 protein localization to bicellular tight junction;GO:1901552 positive regulation of endothelial cell development;GO:1903142 positive regulation of establishment of endothelial barrier	0	1	0	0	1	0	0	0	0	1	0	1	0	0	0	0	0	0	1	0
Ptpn11	19247	symbol	M. musculus	19247	M. musculus	Ptpn11	protein tyrosine phosphatase, non-receptor type 11	GO:0051463 negative regulation of cortisol secretion;GO:0061582 intestinal epithelial cell migration;GO:0033277 abortive mitotic cell cycle	1	1	1	1	0	0	1	1	1	1	1	1	0	0	0	0	0	1	1	1

## Sheet: Enrichment
Supplemental Table 6.Enrichemnt analysis on proteins that changed between sedentary and exercise data.
GroupID	Category	Term	Description	LogP	Log(q-value)	InTerm_InList	Genes	Symbols
1_Summary	GO Biological Processes	GO:0010876	lipid localization	-7.20067	-2.91939	13/437	11303,11980,11981,16803,18559,19247,20479,20851,21763,26420,26569,76303,237542,27421,11979,12724,67151,68514	Abca1,Atp8a1,Atp9a,Lbp,Pctp,Ptpn11,Vps4b,Stat5b,Tex2,Mapk9,Slc27a4,Osbp,Osbpl8,Abcc6,Atp7b,Clcn2,Psmd9,Micu2
1_Member	GO Biological Processes	GO:0010876	lipid localization	-7.20067	-2.91939	13/437	11303,11980,11981,16803,18559,19247,20479,20851,21763,26420,26569,76303,237542	Abca1,Atp8a1,Atp9a,Lbp,Pctp,Ptpn11,Vps4b,Stat5b,Tex2,Mapk9,Slc27a4,Osbp,Osbpl8
1_Member	GO Biological Processes	GO:0006869	lipid transport	-6.86903	-2.88878	12/387	11303,11980,11981,16803,18559,19247,20479,21763,26420,26569,76303,237542	Abca1,Atp8a1,Atp9a,Lbp,Pctp,Ptpn11,Vps4b,Tex2,Mapk9,Slc27a4,Osbp,Osbpl8
1_Member	GO Biological Processes	GO:0015748	organophosphate ester transport	-4.77433	-1.44729	6/122	11303,11980,11981,18559,27421,237542	Abca1,Atp8a1,Atp9a,Pctp,Abcc6,Osbpl8
1_Member	GO Biological Processes	GO:0015914	phospholipid transport	-4.35575	-1.36838	5/88	11303,11980,11981,18559,237542	Abca1,Atp8a1,Atp9a,Pctp,Osbpl8
1_Member	GO Biological Processes	GO:1905952	regulation of lipid localization	-2.89276	-0.711843	5/182	11303,11980,19247,26420,237542	Abca1,Atp8a1,Ptpn11,Mapk9,Osbpl8
1_Member	GO Biological Processes	GO:0045332	phospholipid translocation	-2.82764	-0.663626	3/51	11303,11980,11981	Abca1,Atp8a1,Atp9a
1_Member	GO Biological Processes	GO:0034204	lipid translocation	-2.77929	-0.637883	3/53	11303,11980,11981	Abca1,Atp8a1,Atp9a
1_Member	Reactome Gene Sets	R-MMU-936837	Ion transport by P-type ATPases	-2.77929	-0.637883	3/53	11979,11980,11981	Atp7b,Atp8a1,Atp9a
1_Member	GO Biological Processes	GO:0097035	regulation of membrane lipid distribution	-2.64526	-0.568832	3/59	11303,11980,11981	Abca1,Atp8a1,Atp9a
1_Member	Reactome Gene Sets	R-MMU-382551	Transport of small molecules	-2.63002	-0.560928	9/652	11303,11979,11980,11981,12724,26569,27421,67151,68514	Abca1,Atp7b,Atp8a1,Atp9a,Clcn2,Slc27a4,Abcc6,Psmd9,Micu2
1_Member	GO Biological Processes	GO:0032368	regulation of lipid transport	-2.33501	-0.422114	4/152	11303,11980,19247,26420	Abca1,Atp8a1,Ptpn11,Mapk9
1_Member	Reactome Gene Sets	R-MMU-983712	Ion channel transport	-2.16474	-0.327497	4/170	11979,11980,11981,12724	Atp7b,Atp8a1,Atp9a,Clcn2
1_Member	GO Biological Processes	GO:0032370	positive regulation of lipid transport	-2.00489	-0.224665	3/100	11303,11980,26420	Abca1,Atp8a1,Mapk9
2_Summary	WikiPathways	WP151	IL-5 signaling pathway	-6.25884	-2.45468	6/68	15163,16653,19247,20851,26413,26420,13649,16667,20910,319153,12550,16202,67916,72183,11515,13836,72399,27421,17475,67474,74244,11747,11979,20704,11792,16803,13405,67151,28084,20598,217303,20719,20219,22629,72007,12562,15081	Hcls1,Kras,Ptpn11,Stat5b,Mapk1,Mapk9,Egfr,Krt17,Stxbp1,H3c11,Cdh1,Ilk,Plpp3,Snx6,Adcy9,Epha2,Brap,Abcc6,Mpdz,Snap29,Atg7,Anxa5,Atp7b,Serpina1e,Apex1,Lbp,Dmd,Psmd9,Vps25,Smpd2,Cd300a,Serpinb6a,Apcs,Ywhah,Fndc3b,Cdh5,H3f3b
2_Member	WikiPathways	WP151	IL-5 signaling pathway	-6.25884	-2.45468	6/68	15163,16653,19247,20851,26413,26420	Hcls1,Kras,Ptpn11,Stat5b,Mapk1,Mapk9
2_Member	WikiPathways	WP572	EGFR1 signaling pathway	-5.91284	-2.23362	8/178	13649,16653,16667,19247,20851,20910,26413,319153	Egfr,Kras,Krt17,Ptpn11,Stat5b,Stxbp1,Mapk1,H3c11
2_Member	KEGG Pathway	ko05213	Endometrial cancer	-5.56539	-1.98308	5/50	12550,13649,16202,16653,26413	Cdh1,Egfr,Ilk,Kras,Mapk1
2_Member	KEGG Pathway	mmu05213	Endometrial cancer	-5.39748	-1.89434	5/54	12550,13649,16202,16653,26413	Cdh1,Egfr,Ilk,Kras,Mapk1
2_Member	GO Biological Processes	GO:0060020	Bergmann glial cell differentiation	-4.87328	-1.49508	3/11	19247,26413,67916	Ptpn11,Mapk1,Plpp3
2_Member	WikiPathways	WP450	IL-2 signaling pathway	-4.66411	-1.38283	5/76	16653,19247,20851,26413,26420	Kras,Ptpn11,Stat5b,Mapk1,Mapk9
2_Member	GO Biological Processes	GO:0070849	response to epidermal growth factor	-4.54101	-1.36838	4/40	19247,20851,26413,72183	Ptpn11,Stat5b,Mapk1,Snx6
2_Member	KEGG Pathway	ko05219	Bladder cancer	-4.49789	-1.36838	4/41	12550,13649,16653,26413	Cdh1,Egfr,Kras,Mapk1
2_Member	KEGG Pathway	ko04012	ErbB signaling pathway	-4.42836	-1.36838	5/85	13649,16653,20851,26413,26420	Egfr,Kras,Stat5b,Mapk1,Mapk9
2_Member	KEGG Pathway	mmu05219	Bladder cancer	-4.33605	-1.36838	4/45	12550,13649,16653,26413	Cdh1,Egfr,Kras,Mapk1
2_Member	KEGG Pathway	ko04912	GnRH signaling pathway	-4.33215	-1.36838	5/89	11515,13649,16653,26413,26420	Adcy9,Egfr,Kras,Mapk1,Mapk9
2_Member	KEGG Pathway	ko04072	Phospholipase D signaling pathway	-4.31755	-1.36838	6/147	11515,13649,16653,19247,26413,67916	Adcy9,Egfr,Kras,Ptpn11,Mapk1,Plpp3
2_Member	KEGG Pathway	mmu04012	ErbB signaling pathway	-4.28579	-1.36838	5/91	13649,16653,20851,26413,26420	Egfr,Kras,Stat5b,Mapk1,Mapk9
2_Member	KEGG Pathway	mmu04912	GnRH signaling pathway	-4.26303	-1.36838	5/92	11515,13649,16653,26413,26420	Adcy9,Egfr,Kras,Mapk1,Mapk9
2_Member	KEGG Pathway	ko01522	Endocrine resistance	-4.24053	-1.36838	5/93	11515,13649,16653,26413,26420	Adcy9,Egfr,Kras,Mapk1,Mapk9
2_Member	KEGG Pathway	mmu01522	Endocrine resistance	-4.24053	-1.36838	5/93	11515,13649,16653,26413,26420	Adcy9,Egfr,Kras,Mapk1,Mapk9
2_Member	KEGG Pathway	mmu04072	Phospholipase D signaling pathway	-4.22071	-1.36838	6/153	11515,13649,16653,19247,26413,67916	Adcy9,Egfr,Kras,Ptpn11,Mapk1,Plpp3
2_Member	WikiPathways	WP373	IL-3 signaling pathway	-4.11088	-1.30672	5/99	16653,19247,20851,26413,26420	Kras,Ptpn11,Stat5b,Mapk1,Mapk9
2_Member	KEGG Pathway	ko05231	Choline metabolism in cancer	-4.11088	-1.30672	5/99	13649,16653,26413,26420,67916	Egfr,Kras,Mapk1,Mapk9,Plpp3
2_Member	KEGG Pathway	mmu05231	Choline metabolism in cancer	-4.09011	-1.30019	5/100	13649,16653,26413,26420,67916	Egfr,Kras,Mapk1,Mapk9,Plpp3
2_Member	KEGG Pathway	mmu04014	Ras signaling pathway	-4.05014	-1.27401	7/238	13649,13836,16653,19247,26413,26420,72399	Egfr,Epha2,Kras,Ptpn11,Mapk1,Mapk9,Brap
2_Member	KEGG Pathway	ko05223	Non-small cell lung cancer	-3.9006	-1.17561	4/58	13649,16653,20851,26413	Egfr,Kras,Stat5b,Mapk1
2_Member	KEGG Pathway	mmu05223	Non-small cell lung cancer	-3.84307	-1.14157	4/60	13649,16653,20851,26413	Egfr,Kras,Stat5b,Mapk1
2_Member	KEGG Pathway	mmu04360	Axon guidance	-3.81889	-1.13488	6/181	13836,16202,16653,19247,26413,27421	Epha2,Ilk,Kras,Ptpn11,Mapk1,Abcc6
2_Member	WikiPathways	WP10	IL-9 signaling pathway	-3.80262	-1.13488	3/24	19247,20851,26413	Ptpn11,Stat5b,Mapk1
2_Member	KEGG Pathway	ko05212	Pancreatic cancer	-3.73397	-1.12292	4/64	13649,16653,26413,26420	Egfr,Kras,Mapk1,Mapk9
2_Member	GO Biological Processes	GO:0071276	cellular response to cadmium ion	-3.69663	-1.12292	3/26	13649,26413,26420	Egfr,Mapk1,Mapk9
2_Member	KEGG Pathway	ko04320	Dorso-ventral axis formation	-3.69663	-1.12292	3/26	13649,16653,26413	Egfr,Kras,Mapk1
2_Member	KEGG Pathway	mmu04320	Dorso-ventral axis formation	-3.69663	-1.12292	3/26	13649,16653,26413	Egfr,Kras,Mapk1
2_Member	WikiPathways	WP407	Kit receptor signaling pathway	-3.65688	-1.11596	4/67	17475,19247,20851,26413	Mpdz,Ptpn11,Stat5b,Mapk1
2_Member	KEGG Pathway	mmu05210	Colorectal cancer	-3.65688	-1.11596	4/67	16653,26413,26420,27421	Kras,Mapk1,Mapk9,Abcc6
2_Member	KEGG Pathway	mmu05212	Pancreatic cancer	-3.65688	-1.11596	4/67	13649,16653,26413,26420	Egfr,Kras,Mapk1,Mapk9
2_Member	Reactome Gene Sets	R-MMU-186763	Downstream signal transduction	-3.64687	-1.11377	3/27	16653,19247,20851	Kras,Ptpn11,Stat5b
2_Member	KEGG Pathway	ko05218	Melanoma	-3.60754	-1.08968	4/69	12550,13649,16653,26413	Cdh1,Egfr,Kras,Mapk1
2_Member	KEGG Pathway	ko05220	Chronic myeloid leukemia	-3.55972	-1.07249	4/71	16653,19247,20851,26413	Kras,Ptpn11,Stat5b,Mapk1
2_Member	KEGG Pathway	ko04140	Autophagy - animal	-3.55519	-1.07249	5/130	16653,26413,26420,67474,74244	Kras,Mapk1,Mapk9,Snap29,Atg7
2_Member	Reactome Gene Sets	R-MMU-2871796	FCERI mediated MAPK activation	-3.553	-1.07249	3/29	16653,26413,26420	Kras,Mapk1,Mapk9
2_Member	KEGG Pathway	ko05216	Thyroid cancer	-3.553	-1.07249	3/29	12550,16653,26413	Cdh1,Kras,Mapk1
2_Member	KEGG Pathway	ko04917	Prolactin signaling pathway	-3.53636	-1.06799	4/72	16653,20851,26413,26420	Kras,Stat5b,Mapk1,Mapk9
2_Member	KEGG Pathway	mmu05218	Melanoma	-3.51334	-1.05986	4/73	12550,13649,16653,26413	Cdh1,Egfr,Kras,Mapk1
2_Member	KEGG Pathway	mmu04140	Autophagy - animal	-3.50939	-1.05986	5/133	16653,26413,26420,67474,74244	Kras,Mapk1,Mapk9,Snap29,Atg7
2_Member	GO Biological Processes	GO:0010038	response to metal ion	-3.48684	-1.05066	7/294	11747,11979,12550,13649,20704,26413,26420	Anxa5,Atp7b,Cdh1,Egfr,Serpina1e,Mapk1,Mapk9
2_Member	KEGG Pathway	mmu05220	Chronic myeloid leukemia	-3.46832	-1.0383	4/75	16653,19247,20851,26413	Kras,Ptpn11,Stat5b,Mapk1
2_Member	GO Biological Processes	GO:0034614	cellular response to reactive oxygen species	-3.45007	-1.02834	5/137	11792,13649,26413,26420,74244	Apex1,Egfr,Mapk1,Mapk9,Atg7
2_Member	KEGG Pathway	ko04015	Rap1 signaling pathway	-3.43807	-1.02602	6/213	11515,12550,13649,13836,16653,26413	Adcy9,Cdh1,Egfr,Epha2,Kras,Mapk1
2_Member	KEGG Pathway	mmu04917	Prolactin signaling pathway	-3.42459	-1.02412	4/77	16653,20851,26413,26420	Kras,Stat5b,Mapk1,Mapk9
2_Member	KEGG Pathway	mmu05216	Thyroid cancer	-3.38444	-0.989649	3/33	12550,16653,26413	Cdh1,Kras,Mapk1
2_Member	KEGG Pathway	mmu04015	Rap1 signaling pathway	-3.32212	-0.965121	6/224	11515,12550,13649,13836,16653,26413	Adcy9,Cdh1,Egfr,Epha2,Kras,Mapk1
2_Member	GO Biological Processes	GO:0048708	astrocyte differentiation	-3.30047	-0.953686	4/83	16653,19247,26413,67916	Kras,Ptpn11,Mapk1,Plpp3
2_Member	KEGG Pathway	ko04540	Gap junction	-3.24203	-0.920551	4/86	11515,13649,16653,26413	Adcy9,Egfr,Kras,Mapk1
2_Member	GO Biological Processes	GO:0071364	cellular response to epidermal growth factor stimulus	-3.23644	-0.920551	3/37	19247,20851,72183	Ptpn11,Stat5b,Snx6
2_Member	Reactome Gene Sets	R-MMU-5654741	Signaling by FGFR3	-3.23644	-0.920551	3/37	16653,19247,26413	Kras,Ptpn11,Mapk1
2_Member	KEGG Pathway	ko04914	Progesterone-mediated oocyte maturation	-3.22305	-0.920551	4/87	11515,16653,26413,26420	Adcy9,Kras,Mapk1,Mapk9
2_Member	KEGG Pathway	mmu05200	Pathways in cancer	-3.21956	-0.920551	8/427	11515,12550,13649,16653,20851,26413,26420,27421	Adcy9,Cdh1,Egfr,Kras,Stat5b,Mapk1,Mapk9,Abcc6
2_Member	GO Biological Processes	GO:0046686	response to cadmium ion	-3.20211	-0.916458	3/38	13649,26413,26420	Egfr,Mapk1,Mapk9
2_Member	Reactome Gene Sets	R-MMU-1433557	Signaling by SCF-KIT	-3.20211	-0.916458	3/38	16653,19247,20851	Kras,Ptpn11,Stat5b
2_Member	KEGG Pathway	mmu04540	Gap junction	-3.18579	-0.908827	4/89	11515,13649,16653,26413	Adcy9,Egfr,Kras,Mapk1
2_Member	Reactome Gene Sets	R-MMU-5654743	Signaling by FGFR4	-3.16873	-0.896045	3/39	16653,19247,26413	Kras,Ptpn11,Mapk1
2_Member	Reactome Gene Sets	R-MMU-5675221	Negative regulation of MAPK pathway	-3.13625	-0.876161	3/40	16653,26413,72399	Kras,Mapk1,Brap
2_Member	KEGG Pathway	ko04915	Estrogen signaling pathway	-3.06227	-0.823299	4/96	11515,13649,16653,26413	Adcy9,Egfr,Kras,Mapk1
2_Member	GO Biological Processes	GO:0071248	cellular response to metal ion	-3.05926	-0.823299	5/167	11979,12550,13649,26413,26420	Atp7b,Cdh1,Egfr,Mapk1,Mapk9
2_Member	Reactome Gene Sets	R-MMU-166016	Toll Like Receptor 4 (TLR4) Cascade	-3.04543	-0.813367	4/97	16803,19247,26413,26420	Lbp,Ptpn11,Mapk1,Mapk9
2_Member	GO Biological Processes	GO:0010001	glial cell differentiation	-3.02806	-0.803678	6/255	13405,16202,16653,19247,26413,67916	Dmd,Ilk,Kras,Ptpn11,Mapk1,Plpp3
2_Member	KEGG Pathway	mmu04914	Progesterone-mediated oocyte maturation	-3.01233	-0.791747	4/99	11515,16653,26413,26420	Adcy9,Kras,Mapk1,Mapk9
2_Member	KEGG Pathway	ko04933	AGE-RAGE signaling pathway in diabetic complications	-2.99606	-0.780824	4/100	16653,20851,26413,26420	Kras,Stat5b,Mapk1,Mapk9
2_Member	Reactome Gene Sets	R-MMU-177929	Signaling by EGFR	-2.98595	-0.776546	3/45	13649,16653,19247	Egfr,Kras,Ptpn11
2_Member	KEGG Pathway	ko04360	Axon guidance	-2.96842	-0.766316	5/175	13836,16202,16653,19247,26413	Epha2,Ilk,Kras,Ptpn11,Mapk1
2_Member	Reactome Gene Sets	R-MMU-5654736	Signaling by FGFR1	-2.95804	-0.763117	3/46	16653,19247,26413	Kras,Ptpn11,Mapk1
2_Member	Reactome Gene Sets	R-MMU-5684996	MAPK1/MAPK3 signaling	-2.94208	-0.750701	6/265	13649,16653,19247,26413,67151,72399	Egfr,Kras,Ptpn11,Mapk1,Psmd9,Brap
2_Member	KEGG Pathway	mmu04933	AGE-RAGE signaling pathway in diabetic complications	-2.9173	-0.732929	4/105	16653,20851,26413,26420	Kras,Stat5b,Mapk1,Mapk9
2_Member	KEGG Pathway	mmu04915	Estrogen signaling pathway	-2.85724	-0.683163	4/109	11515,13649,16653,26413	Adcy9,Egfr,Kras,Mapk1
2_Member	GO Biological Processes	GO:0000302	response to reactive oxygen species	-2.84073	-0.67004	5/187	11792,13649,26413,26420,74244	Apex1,Egfr,Mapk1,Mapk9,Atg7
2_Member	GO Biological Processes	GO:0038127	ERBB signaling pathway	-2.78552	-0.637883	4/114	13649,19247,26413,28084	Egfr,Ptpn11,Mapk1,Vps25
2_Member	Reactome Gene Sets	R-MMU-186797	Signaling by PDGF	-2.77929	-0.637883	3/53	16653,19247,20851	Kras,Ptpn11,Stat5b
2_Member	Reactome Gene Sets	R-MMU-5683057	MAPK family signaling cascades	-2.75822	-0.629525	6/288	13649,16653,19247,26413,67151,72399	Egfr,Kras,Ptpn11,Mapk1,Psmd9,Brap
2_Member	Reactome Gene Sets	R-MMU-2454202	Fc epsilon receptor (FCERI) signaling	-2.75781	-0.629525	4/116	16653,26413,26420,67151	Kras,Mapk1,Mapk9,Psmd9
2_Member	KEGG Pathway	ko05221	Acute myeloid leukemia	-2.73287	-0.615935	3/55	16653,20851,26413	Kras,Stat5b,Mapk1
2_Member	KEGG Pathway	ko04722	Neurotrophin signaling pathway	-2.69081	-0.5885	4/121	16653,19247,26413,26420	Kras,Ptpn11,Mapk1,Mapk9
2_Member	KEGG Pathway	ko04071	Sphingolipid signaling pathway	-2.67778	-0.582247	4/122	16653,20598,26413,26420	Kras,Smpd2,Mapk1,Mapk9
2_Member	KEGG Pathway	mmu05221	Acute myeloid leukemia	-2.66655	-0.582247	3/58	16653,20851,26413	Kras,Stat5b,Mapk1
2_Member	KEGG Pathway	mmu04071	Sphingolipid signaling pathway	-2.66487	-0.582247	4/123	16653,20598,26413,26420	Kras,Smpd2,Mapk1,Mapk9
2_Member	KEGG Pathway	mmu04722	Neurotrophin signaling pathway	-2.66487	-0.582247	4/123	16653,19247,26413,26420	Kras,Ptpn11,Mapk1,Mapk9
2_Member	KEGG Pathway	ko05205	Proteoglycans in cancer	-2.65682	-0.576935	5/206	13649,15163,16653,19247,26413	Egfr,Hcls1,Kras,Ptpn11,Mapk1
2_Member	GO Biological Processes	GO:0010035	response to inorganic substance	-2.64329	-0.568832	8/526	11747,11792,11979,12550,13649,20704,26413,26420	Anxa5,Apex1,Atp7b,Cdh1,Egfr,Serpina1e,Mapk1,Mapk9
2_Member	Reactome Gene Sets	R-MMU-168898	Toll-like Receptor Cascades	-2.62685	-0.560409	4/126	16803,19247,26413,26420	Lbp,Ptpn11,Mapk1,Mapk9
2_Member	GO Biological Processes	GO:0000165	MAPK cascade	-2.59325	-0.547496	10/791	13405,13649,13836,16202,16653,19247,26413,26420,72399,217303	Dmd,Egfr,Epha2,Ilk,Kras,Ptpn11,Mapk1,Mapk9,Brap,Cd300a
2_Member	KEGG Pathway	ko05210	Colorectal cancer	-2.58368	-0.545436	3/62	16653,26413,26420	Kras,Mapk1,Mapk9
2_Member	KEGG Pathway	mmu05205	Proteoglycans in cancer	-2.56782	-0.542074	5/216	13649,15163,16653,19247,26413	Egfr,Hcls1,Kras,Ptpn11,Mapk1
2_Member	KEGG Pathway	ko05214	Glioma	-2.5444	-0.534957	3/64	13649,16653,26413	Egfr,Kras,Mapk1
2_Member	KEGG Pathway	ko05230	Central carbon metabolism in cancer	-2.5444	-0.534957	3/64	13649,16653,26413	Egfr,Kras,Mapk1
2_Member	KEGG Pathway	ko05160	Hepatitis C	-2.53025	-0.525368	4/134	13649,16653,26413,26420	Egfr,Kras,Mapk1,Mapk9
2_Member	KEGG Pathway	ko05211	Renal cell carcinoma	-2.52526	-0.525368	3/65	16653,19247,26413	Kras,Ptpn11,Mapk1
2_Member	KEGG Pathway	mmu05214	Glioma	-2.50643	-0.512948	3/66	13649,16653,26413	Egfr,Kras,Mapk1
2_Member	Reactome Gene Sets	R-MMU-5654738	Signaling by FGFR2	-2.48791	-0.501095	3/67	16653,19247,26413	Kras,Ptpn11,Mapk1
2_Member	Reactome Gene Sets	R-MMU-9009391	Extra-nuclear estrogen signaling	-2.48791	-0.501095	3/67	13649,16653,26413	Egfr,Kras,Mapk1
2_Member	KEGG Pathway	mmu05160	Hepatitis C	-2.47314	-0.492888	4/139	13649,16653,26413,26420	Egfr,Kras,Mapk1,Mapk9
2_Member	KEGG Pathway	ko04664	Fc epsilon RI signaling pathway	-2.46969	-0.491606	3/68	16653,26413,26420	Kras,Mapk1,Mapk9
2_Member	GO Biological Processes	GO:0062197	cellular response to chemical stress	-2.4644	-0.488469	6/330	11792,13649,20719,26413,26420,74244	Apex1,Egfr,Serpinb6a,Mapk1,Mapk9,Atg7
2_Member	KEGG Pathway	mmu05211	Renal cell carcinoma	-2.45177	-0.48142	3/69	16653,19247,26413	Kras,Ptpn11,Mapk1
2_Member	KEGG Pathway	mmu05230	Central carbon metabolism in cancer	-2.45177	-0.48142	3/69	13649,16653,26413	Egfr,Kras,Mapk1
2_Member	KEGG Pathway	mmu04371	Apelin signaling pathway	-2.43999	-0.475505	4/142	11515,12550,16653,26413	Adcy9,Cdh1,Kras,Mapk1
2_Member	KEGG Pathway	mmu04664	Fc epsilon RI signaling pathway	-2.43412	-0.475505	3/70	16653,26413,26420	Kras,Mapk1,Mapk9
2_Member	GO Biological Processes	GO:0018105	peptidyl-serine phosphorylation	-2.4012	-0.453023	6/340	13405,13649,15163,16202,26413,26420	Dmd,Egfr,Hcls1,Ilk,Mapk1,Mapk9
2_Member	KEGG Pathway	ko04520	Adherens junction	-2.39964	-0.453023	3/72	12550,13649,26413	Cdh1,Egfr,Mapk1
2_Member	GO Biological Processes	GO:0071241	cellular response to inorganic substance	-2.39585	-0.453023	5/237	11979,12550,13649,26413,26420	Atp7b,Cdh1,Egfr,Mapk1,Mapk9
2_Member	GO Biological Processes	GO:0042063	gliogenesis	-2.37656	-0.437703	6/344	13405,16202,16653,19247,26413,67916	Dmd,Ilk,Kras,Ptpn11,Mapk1,Plpp3
2_Member	KEGG Pathway	mmu05161	Hepatitis B	-2.35536	-0.42842	4/150	16653,20851,26413,26420	Kras,Stat5b,Mapk1,Mapk9
2_Member	WikiPathways	WP1244	Estrogen signaling	-2.34984	-0.42839	3/75	16202,26413,26420	Ilk,Mapk1,Mapk9
2_Member	KEGG Pathway	mmu04520	Adherens junction	-2.34984	-0.42839	3/75	12550,13649,26413	Cdh1,Egfr,Mapk1
2_Member	GO Biological Processes	GO:0043408	regulation of MAPK cascade	-2.33418	-0.422114	9/723	13405,13649,13836,16202,16653,19247,26413,26420,217303	Dmd,Egfr,Epha2,Ilk,Kras,Ptpn11,Mapk1,Mapk9,Cd300a
2_Member	GO Biological Processes	GO:0045596	negative regulation of cell differentiation	-2.33418	-0.422114	9/723	13405,13649,16653,19247,20219,20851,22629,26413,72007	Dmd,Egfr,Kras,Ptpn11,Apcs,Stat5b,Ywhah,Mapk1,Fndc3b
2_Member	KEGG Pathway	ko04921	Oxytocin signaling pathway	-2.32495	-0.41473	4/153	11515,13649,16653,26413	Adcy9,Egfr,Kras,Mapk1
2_Member	Reactome Gene Sets	R-MMU-9006925	Intracellular signaling by second messengers	-2.30557	-0.401107	5/249	11515,13649,19247,26413,67151	Adcy9,Egfr,Ptpn11,Mapk1,Psmd9
2_Member	KEGG Pathway	ko05132	Salmonella infection	-2.30218	-0.401107	3/78	16803,26413,26420	Lbp,Mapk1,Mapk9
2_Member	KEGG Pathway	mmu04921	Oxytocin signaling pathway	-2.29522	-0.39595	4/156	11515,13649,16653,26413	Adcy9,Egfr,Kras,Mapk1
2_Member	Reactome Gene Sets	R-MMU-190236	Signaling by FGFR	-2.28674	-0.392847	3/79	16653,19247,26413	Kras,Ptpn11,Mapk1
2_Member	WikiPathways	WP493	Mapk signaling pathway	-2.27576	-0.383644	4/158	13649,16653,26413,26420	Egfr,Kras,Mapk1,Mapk9
2_Member	KEGG Pathway	ko01521	EGFR tyrosine kinase inhibitor resistance	-2.27152	-0.382929	3/80	13649,16653,26413	Egfr,Kras,Mapk1
2_Member	KEGG Pathway	mmu01521	EGFR tyrosine kinase inhibitor resistance	-2.27152	-0.382929	3/80	13649,16653,26413	Egfr,Kras,Mapk1
2_Member	WikiPathways	WP65	Insulin signaling	-2.26614	-0.380769	4/159	19247,20910,26413,26420	Ptpn11,Stxbp1,Mapk1,Mapk9
2_Member	KEGG Pathway	mmu05132	Salmonella infection	-2.2565	-0.373682	3/81	16803,26413,26420	Lbp,Mapk1,Mapk9
2_Member	Reactome Gene Sets	R-MMU-422475	Axon guidance	-2.25529	-0.373682	5/256	13649,13836,16653,19247,26413	Egfr,Epha2,Kras,Ptpn11,Mapk1
2_Member	GO Biological Processes	GO:0018209	peptidyl-serine modification	-2.25289	-0.373251	6/365	13405,13649,15163,16202,26413,26420	Dmd,Egfr,Hcls1,Ilk,Mapk1,Mapk9
2_Member	Reactome Gene Sets	R-MMU-9675108	Nervous system development	-2.24825	-0.373251	5/257	13649,13836,16653,19247,26413	Egfr,Epha2,Kras,Ptpn11,Mapk1
2_Member	Reactome Gene Sets	R-MMU-166166	MyD88-independent TLR4 cascade	-2.24168	-0.373251	3/82	19247,26413,26420	Ptpn11,Mapk1,Mapk9
2_Member	Reactome Gene Sets	R-MMU-937061	TRIF(TICAM1)-mediated TLR4 signaling	-2.24168	-0.373251	3/82	19247,26413,26420	Ptpn11,Mapk1,Mapk9
2_Member	Reactome Gene Sets	R-MMU-5673001	RAF/MAP kinase cascade	-2.23425	-0.367945	5/259	13649,16653,26413,67151,72399	Egfr,Kras,Mapk1,Psmd9,Brap
2_Member	GO Biological Processes	GO:0034599	cellular response to oxidative stress	-2.17289	-0.331697	5/268	11792,13649,26413,26420,74244	Apex1,Egfr,Mapk1,Mapk9,Atg7
2_Member	KEGG Pathway	ko04658	Th1 and Th2 cell differentiation	-2.1705	-0.331697	3/87	20851,26413,26420	Stat5b,Mapk1,Mapk9
2_Member	KEGG Pathway	ko05215	Prostate cancer	-2.1705	-0.331697	3/87	13649,16653,26413	Egfr,Kras,Mapk1
2_Member	KEGG Pathway	mmu04658	Th1 and Th2 cell differentiation	-2.15681	-0.322683	3/88	20851,26413,26420	Stat5b,Mapk1,Mapk9
2_Member	WikiPathways	WP2292	Chemokine signaling pathway	-2.07073	-0.262202	4/181	11515,16653,20851,26413	Adcy9,Kras,Stat5b,Mapk1
2_Member	Reactome Gene Sets	R-MMU-6811558	PI5P, PP2A and IER3 Regulate PI3K/AKT Signaling	-2.06557	-0.259958	3/95	13649,19247,26413	Egfr,Ptpn11,Mapk1
2_Member	WikiPathways	WP85	Focal adhesion	-2.0382	-0.23836	4/185	13649,16202,26413,26420	Egfr,Ilk,Mapk1,Mapk9
2_Member	KEGG Pathway	ko04062	Chemokine signaling pathway	-2.0382	-0.23836	4/185	11515,16653,20851,26413	Adcy9,Kras,Stat5b,Mapk1
2_Member	Reactome Gene Sets	R-MMU-9006934	Signaling by Receptor Tyrosine Kinases	-2.0357	-0.23729	6/406	12562,13649,16653,19247,20851,26413	Cdh5,Egfr,Kras,Ptpn11,Stat5b,Mapk1
2_Member	WikiPathways	WP387	IL-6 signaling pathway	-2.01675	-0.228608	3/99	19247,20851,26413	Ptpn11,Stat5b,Mapk1
2_Member	KEGG Pathway	ko04620	Toll-like receptor signaling pathway	-2.01675	-0.228608	3/99	16803,26413,26420	Lbp,Mapk1,Mapk9
2_Member	KEGG Pathway	ko04916	Melanogenesis	-2.00489	-0.224665	3/100	11515,16653,26413	Adcy9,Kras,Mapk1
2_Member	GO Biological Processes	GO:0001503	ossification	-2.00146	-0.223964	6/413	13836,15081,16202,19247,26413,72007	Epha2,H3f3b,Ilk,Ptpn11,Mapk1,Fndc3b
3_Summary	GO Biological Processes	GO:0023061	signal release	-5.04345	-1.60727	12/579	11303,11747,19247,20910,26420,67151,67474,72194,74244,76303,108030,217303,11981,20479,56373,12550,15163,20362,26413,54160	Abca1,Anxa5,Ptpn11,Stxbp1,Mapk9,Psmd9,Snap29,Fbxl20,Atg7,Osbp,Lin7a,Cd300a,Atp9a,Vps4b,Cpb2,Cdh1,Hcls1,Septin8,Mapk1,Copg2
3_Member	GO Biological Processes	GO:0023061	signal release	-5.04345	-1.60727	12/579	11303,11747,19247,20910,26420,67151,67474,72194,74244,76303,108030,217303	Abca1,Anxa5,Ptpn11,Stxbp1,Mapk9,Psmd9,Snap29,Fbxl20,Atg7,Osbp,Lin7a,Cd300a
3_Member	GO Biological Processes	GO:1903530	regulation of secretion by cell	-4.39914	-1.36838	12/673	11747,11981,19247,20479,20910,26420,56373,67151,72194,74244,76303,217303	Anxa5,Atp9a,Ptpn11,Vps4b,Stxbp1,Mapk9,Cpb2,Psmd9,Fbxl20,Atg7,Osbp,Cd300a
3_Member	GO Biological Processes	GO:1903531	negative regulation of secretion by cell	-3.96782	-1.20505	6/170	11747,11981,19247,20479,67151,217303	Anxa5,Atp9a,Ptpn11,Vps4b,Psmd9,Cd300a
3_Member	GO Biological Processes	GO:0051046	regulation of secretion	-3.91266	-1.17561	12/757	11747,11981,19247,20479,20910,26420,56373,67151,72194,74244,76303,217303	Anxa5,Atp9a,Ptpn11,Vps4b,Stxbp1,Mapk9,Cpb2,Psmd9,Fbxl20,Atg7,Osbp,Cd300a
3_Member	GO Biological Processes	GO:1903532	positive regulation of secretion by cell	-3.71382	-1.12292	8/360	19247,20479,20910,26420,56373,67151,74244,76303	Ptpn11,Vps4b,Stxbp1,Mapk9,Cpb2,Psmd9,Atg7,Osbp
3_Member	GO Biological Processes	GO:0051048	negative regulation of secretion	-3.59604	-1.08561	6/199	11747,11981,19247,20479,67151,217303	Anxa5,Atp9a,Ptpn11,Vps4b,Psmd9,Cd300a
3_Member	GO Biological Processes	GO:0051047	positive regulation of secretion	-3.31462	-0.962752	8/413	19247,20479,20910,26420,56373,67151,74244,76303	Ptpn11,Vps4b,Stxbp1,Mapk9,Cpb2,Psmd9,Atg7,Osbp
3_Member	GO Biological Processes	GO:0051223	regulation of protein transport	-3.15733	-0.888887	9/547	11747,12550,15163,19247,20362,26413,67151,74244,76303	Anxa5,Cdh1,Hcls1,Ptpn11,Septin8,Mapk1,Psmd9,Atg7,Osbp
3_Member	GO Biological Processes	GO:0070201	regulation of establishment of protein localization	-2.99392	-0.780824	9/577	11747,12550,15163,19247,20362,26413,67151,74244,76303	Anxa5,Cdh1,Hcls1,Ptpn11,Septin8,Mapk1,Psmd9,Atg7,Osbp
3_Member	GO Biological Processes	GO:0009306	protein secretion	-2.75547	-0.629525	7/392	11303,11747,19247,54160,67151,74244,76303	Abca1,Anxa5,Ptpn11,Copg2,Psmd9,Atg7,Osbp
3_Member	GO Biological Processes	GO:0035592	establishment of protein localization to extracellular region	-2.74921	-0.627973	7/393	11303,11747,19247,54160,67151,74244,76303	Abca1,Anxa5,Ptpn11,Copg2,Psmd9,Atg7,Osbp
3_Member	GO Biological Processes	GO:0071692	protein localization to extracellular region	-2.70589	-0.59765	7/400	11303,11747,19247,54160,67151,74244,76303	Abca1,Anxa5,Ptpn11,Copg2,Psmd9,Atg7,Osbp
3_Member	GO Biological Processes	GO:0002790	peptide secretion	-2.70575	-0.59765	6/295	11303,11747,19247,67151,74244,76303	Abca1,Anxa5,Ptpn11,Psmd9,Atg7,Osbp
3_Member	GO Biological Processes	GO:0090278	negative regulation of peptide hormone secretion	-2.60384	-0.551227	3/61	11747,19247,67151	Anxa5,Ptpn11,Psmd9
3_Member	GO Biological Processes	GO:0002792	negative regulation of peptide secretion	-2.56387	-0.542074	3/63	11747,19247,67151	Anxa5,Ptpn11,Psmd9
3_Member	GO Biological Processes	GO:0015833	peptide transport	-2.55699	-0.538157	6/316	11303,11747,19247,67151,74244,76303	Abca1,Anxa5,Ptpn11,Psmd9,Atg7,Osbp
3_Member	GO Biological Processes	GO:0051222	positive regulation of protein transport	-2.55021	-0.534957	6/317	12550,15163,26413,67151,74244,76303	Cdh1,Hcls1,Mapk1,Psmd9,Atg7,Osbp
3_Member	GO Biological Processes	GO:1904951	positive regulation of establishment of protein localization	-2.44519	-0.477777	6/333	12550,15163,26413,67151,74244,76303	Cdh1,Hcls1,Mapk1,Psmd9,Atg7,Osbp
3_Member	GO Biological Processes	GO:0090276	regulation of peptide hormone secretion	-2.4351	-0.475505	5/232	11747,19247,67151,74244,76303	Anxa5,Ptpn11,Psmd9,Atg7,Osbp
3_Member	GO Biological Processes	GO:0002791	regulation of peptide secretion	-2.39585	-0.453023	5/237	11747,19247,67151,74244,76303	Anxa5,Ptpn11,Psmd9,Atg7,Osbp
3_Member	GO Biological Processes	GO:0090087	regulation of peptide transport	-2.38043	-0.439586	5/239	11747,19247,67151,74244,76303	Anxa5,Ptpn11,Psmd9,Atg7,Osbp
3_Member	GO Biological Processes	GO:0042886	amide transport	-2.35832	-0.429221	6/347	11303,11747,19247,67151,74244,76303	Abca1,Anxa5,Ptpn11,Psmd9,Atg7,Osbp
3_Member	GO Biological Processes	GO:0050709	negative regulation of protein secretion	-2.28674	-0.392847	3/79	11747,19247,67151	Anxa5,Ptpn11,Psmd9
3_Member	GO Biological Processes	GO:0046887	positive regulation of hormone secretion	-2.20985	-0.35345	4/165	19247,67151,74244,76303	Ptpn11,Psmd9,Atg7,Osbp
3_Member	GO Biological Processes	GO:0046888	negative regulation of hormone secretion	-2.1705	-0.331697	3/87	11747,19247,67151	Anxa5,Ptpn11,Psmd9
3_Member	GO Biological Processes	GO:0051051	negative regulation of transport	-2.15824	-0.322683	7/504	11747,11981,19247,20479,67151,74244,217303	Anxa5,Atp9a,Ptpn11,Vps4b,Psmd9,Atg7,Cd300a
3_Member	GO Biological Processes	GO:0032024	positive regulation of insulin secretion	-2.11675	-0.291832	3/91	67151,74244,76303	Psmd9,Atg7,Osbp
3_Member	GO Biological Processes	GO:0030072	peptide hormone secretion	-2.05127	-0.24855	5/287	11747,19247,67151,74244,76303	Anxa5,Ptpn11,Psmd9,Atg7,Osbp
3_Member	GO Biological Processes	GO:0050796	regulation of insulin secretion	-2.01435	-0.228608	4/188	19247,67151,74244,76303	Ptpn11,Psmd9,Atg7,Osbp
4_Summary	GO Biological Processes	GO:0001934	positive regulation of protein phosphorylation	-4.49176	-1.36838	13/769	13649,15163,16202,16653,17118,19247,26413,26420,63913,67916,76303,217303,237542,13836	Egfr,Hcls1,Ilk,Kras,Marcks,Ptpn11,Mapk1,Mapk9,Niban1,Plpp3,Osbp,Cd300a,Osbpl8,Epha2
4_Member	GO Biological Processes	GO:0001934	positive regulation of protein phosphorylation	-4.49176	-1.36838	13/769	13649,15163,16202,16653,17118,19247,26413,26420,63913,67916,76303,217303,237542	Egfr,Hcls1,Ilk,Kras,Marcks,Ptpn11,Mapk1,Mapk9,Niban1,Plpp3,Osbp,Cd300a,Osbpl8
4_Member	GO Biological Processes	GO:0051896	regulation of protein kinase B signaling	-2.97951	-0.773775	5/174	13649,13836,15163,16202,237542	Egfr,Epha2,Hcls1,Ilk,Osbpl8
4_Member	GO Biological Processes	GO:0051897	positive regulation of protein kinase B signaling	-2.75781	-0.629525	4/116	13649,15163,16202,237542	Egfr,Hcls1,Ilk,Osbpl8
4_Member	GO Biological Processes	GO:0043491	protein kinase B signaling	-2.666	-0.582247	5/205	13649,13836,15163,16202,237542	Egfr,Epha2,Hcls1,Ilk,Osbpl8
4_Member	GO Biological Processes	GO:0051347	positive regulation of transferase activity	-2.60289	-0.551227	8/534	13649,13836,16202,16653,17118,26413,217303,237542	Egfr,Epha2,Ilk,Kras,Marcks,Mapk1,Cd300a,Osbpl8
4_Member	GO Biological Processes	GO:0033674	positive regulation of kinase activity	-2.42212	-0.467175	7/450	13649,13836,16202,16653,17118,217303,237542	Egfr,Epha2,Ilk,Kras,Marcks,Cd300a,Osbpl8
4_Member	GO Biological Processes	GO:0045860	positive regulation of protein kinase activity	-2.20812	-0.353348	6/373	13649,16202,16653,17118,217303,237542	Egfr,Ilk,Kras,Marcks,Cd300a,Osbpl8
5_Summary	GO Biological Processes	GO:0120192	tight junction assembly	-4.35575	-1.36838	5/88	12550,12562,13836,17475,54135,26420,13405,16667,20851,69772,72007	Cdh1,Cdh5,Epha2,Mpdz,Lsr,Mapk9,Dmd,Krt17,Stat5b,Bdh2,Fndc3b
5_Member	GO Biological Processes	GO:0120192	tight junction assembly	-4.35575	-1.36838	5/88	12550,12562,13836,17475,54135	Cdh1,Cdh5,Epha2,Mpdz,Lsr
5_Member	GO Biological Processes	GO:0120193	tight junction organization	-4.2183	-1.36838	5/94	12550,12562,13836,17475,54135	Cdh1,Cdh5,Epha2,Mpdz,Lsr
5_Member	GO Biological Processes	GO:0150105	protein localization to cell-cell junction	-3.80262	-1.13488	3/24	12562,26420,54135	Cdh5,Mapk9,Lsr
5_Member	GO Biological Processes	GO:0007043	cell-cell junction assembly	-3.20526	-0.916458	5/155	12550,12562,13836,17475,54135	Cdh1,Cdh5,Epha2,Mpdz,Lsr
5_Member	GO Biological Processes	GO:0045216	cell-cell junction organization	-2.5765	-0.542074	5/215	12550,12562,13836,17475,54135	Cdh1,Cdh5,Epha2,Mpdz,Lsr
5_Member	GO Biological Processes	GO:0070830	bicellular tight junction assembly	-2.22707	-0.365742	3/83	12550,12562,13836	Cdh1,Cdh5,Epha2
5_Member	GO Biological Processes	GO:0043297	apical junction assembly	-2.10372	-0.284836	3/92	12550,12562,13836	Cdh1,Cdh5,Epha2
5_Member	GO Biological Processes	GO:0030855	epithelial cell differentiation	-2.07626	-0.2658	8/655	12550,12562,13405,13836,16667,20851,69772,72007	Cdh1,Cdh5,Dmd,Epha2,Krt17,Stat5b,Bdh2,Fndc3b
6_Summary	GO Biological Processes	GO:0048732	gland development	-4.33057	-1.36838	10/475	11979,12550,12724,13649,13836,20851,26413,54135,56373,74244,11747,20910	Atp7b,Cdh1,Clcn2,Egfr,Epha2,Stat5b,Mapk1,Lsr,Cpb2,Atg7,Anxa5,Stxbp1
6_Member	GO Biological Processes	GO:0048732	gland development	-4.33057	-1.36838	10/475	11979,12550,12724,13649,13836,20851,26413,54135,56373,74244	Atp7b,Cdh1,Clcn2,Egfr,Epha2,Stat5b,Mapk1,Lsr,Cpb2,Atg7
6_Member	GO Biological Processes	GO:0050878	regulation of body fluid levels	-3.65714	-1.11596	8/367	11747,11979,12550,20851,20910,54135,56373,74244	Anxa5,Atp7b,Cdh1,Stat5b,Stxbp1,Lsr,Cpb2,Atg7
6_Member	GO Biological Processes	GO:0001889	liver development	-2.60206	-0.551227	4/128	20851,54135,56373,74244	Stat5b,Lsr,Cpb2,Atg7
6_Member	GO Biological Processes	GO:0061008	hepaticobiliary system development	-2.56569	-0.542074	4/131	20851,54135,56373,74244	Stat5b,Lsr,Cpb2,Atg7
7_Summary	Reactome Gene Sets	R-MMU-9006931	Signaling by Nuclear Receptors	-4.11949	-1.30672	7/232	11303,13649,15081,16653,26413,97114,319153,26420,19247,20851,67151,22629,11747,20719,12550,13836,21763	Abca1,Egfr,H3f3b,Kras,Mapk1,H3c15,H3c11,Mapk9,Ptpn11,Stat5b,Psmd9,Ywhah,Anxa5,Serpinb6a,Cdh1,Epha2,Tex2
7_Member	Reactome Gene Sets	R-MMU-9006931	Signaling by Nuclear Receptors	-4.11949	-1.30672	7/232	11303,13649,15081,16653,26413,97114,319153	Abca1,Egfr,H3f3b,Kras,Mapk1,H3c15,H3c11
7_Member	Reactome Gene Sets	R-MMU-2559580	Oxidative Stress Induced Senescence	-3.9508	-1.20099	5/107	15081,26413,26420,97114,319153	H3f3b,Mapk1,Mapk9,H3c15,H3c11
7_Member	Reactome Gene Sets	R-MMU-449147	Signaling by Interleukins	-3.87462	-1.16154	7/254	19247,20851,26413,26420,67151,97114,319153	Ptpn11,Stat5b,Mapk1,Mapk9,Psmd9,H3c15,H3c11
7_Member	Reactome Gene Sets	R-MMU-8939211	ESR-mediated signaling	-3.79291	-1.13488	6/183	13649,15081,16653,26413,97114,319153	Egfr,H3f3b,Kras,Mapk1,H3c15,H3c11
7_Member	Reactome Gene Sets	R-MMU-1266695	Interleukin-7 signaling	-3.69663	-1.12292	3/26	20851,97114,319153	Stat5b,H3c15,H3c11
7_Member	Reactome Gene Sets	R-MMU-1280215	Cytokine Signaling in Immune system	-3.5476	-1.07249	8/381	16653,19247,20851,26413,26420,67151,97114,319153	Kras,Ptpn11,Stat5b,Mapk1,Mapk9,Psmd9,H3c15,H3c11
7_Member	Reactome Gene Sets	R-MMU-5625740	RHO GTPases activate PKNs	-3.28074	-0.938975	4/84	15081,22629,97114,319153	H3f3b,Ywhah,H3c15,H3c11
7_Member	Reactome Gene Sets	R-MMU-2559583	Cellular Senescence	-3.11859	-0.862617	5/162	15081,26413,26420,97114,319153	H3f3b,Mapk1,Mapk9,H3c15,H3c11
7_Member	Reactome Gene Sets	R-MMU-2559582	Senescence-Associated Secretory Phenotype (SASP)	-3.07929	-0.835437	4/95	15081,26413,97114,319153	H3f3b,Mapk1,H3c15,H3c11
7_Member	Reactome Gene Sets	R-MMU-8878171	Transcriptional regulation by RUNX1	-2.83052	-0.663626	5/188	15081,19247,67151,97114,319153	H3f3b,Ptpn11,Psmd9,H3c15,H3c11
7_Member	Reactome Gene Sets	R-MMU-109582	Hemostasis	-2.74789	-0.627973	8/506	11747,15081,16653,19247,20719,26413,97114,319153	Anxa5,H3f3b,Kras,Ptpn11,Serpinb6a,Mapk1,H3c15,H3c11
7_Member	KEGG Pathway	ko05034	Alcoholism	-2.72219	-0.608224	5/199	15081,16653,26413,97114,319153	H3f3b,Kras,Mapk1,H3c15,H3c11
7_Member	KEGG Pathway	mmu05034	Alcoholism	-2.69385	-0.588659	5/202	15081,16653,26413,97114,319153	H3f3b,Kras,Mapk1,H3c15,H3c11
7_Member	Reactome Gene Sets	R-MMU-195258	RHO GTPase Effectors	-2.64046	-0.568691	6/304	12550,15081,22629,26413,97114,319153	Cdh1,H3f3b,Ywhah,Mapk1,H3c15,H3c11
7_Member	Reactome Gene Sets	R-MMU-427413	NoRC negatively regulates rRNA expression	-2.58368	-0.545436	3/62	15081,97114,319153	H3f3b,H3c15,H3c11
7_Member	Reactome Gene Sets	R-MMU-73728	RNA Polymerase I Promoter Opening	-2.56387	-0.542074	3/63	15081,97114,319153	H3f3b,H3c15,H3c11
7_Member	Reactome Gene Sets	R-MMU-427359	SIRT1 negatively regulates rRNA expression	-2.5444	-0.534957	3/64	15081,97114,319153	H3f3b,H3c15,H3c11
7_Member	Reactome Gene Sets	R-MMU-5250941	Negative epigenetic regulation of rRNA expression	-2.52526	-0.525368	3/65	15081,97114,319153	H3f3b,H3c15,H3c11
7_Member	Reactome Gene Sets	R-MMU-5625886	Activated PKN1 stimulates transcription of AR (androgen receptor) regulated genes KLK2 and KLK3	-2.50643	-0.512948	3/66	15081,97114,319153	H3f3b,H3c15,H3c11
7_Member	Reactome Gene Sets	R-MMU-212300	PRC2 methylates histones and DNA	-2.36619	-0.435156	3/74	15081,97114,319153	H3f3b,H3c15,H3c11
7_Member	Reactome Gene Sets	R-MMU-8936459	RUNX1 regulates genes involved in megakaryocyte differentiation and platelet function	-2.28674	-0.392847	3/79	15081,97114,319153	H3f3b,H3c15,H3c11
7_Member	Reactome Gene Sets	R-MMU-73772	RNA Polymerase I Promoter Escape	-2.14329	-0.310711	3/89	15081,97114,319153	H3f3b,H3c15,H3c11
7_Member	Reactome Gene Sets	R-MMU-5250913	Positive epigenetic regulation of rRNA expression	-2.12994	-0.303307	3/90	15081,97114,319153	H3f3b,H3c15,H3c11
7_Member	Reactome Gene Sets	R-MMU-5250924	B-WICH complex positively regulates rRNA expression	-2.12994	-0.303307	3/90	15081,97114,319153	H3f3b,H3c15,H3c11
7_Member	Reactome Gene Sets	R-MMU-194315	Signaling by Rho GTPases	-2.08767	-0.273249	8/652	12550,13836,15081,21763,22629,26413,97114,319153	Cdh1,Epha2,H3f3b,Tex2,Ywhah,Mapk1,H3c15,H3c11
7_Member	Reactome Gene Sets	R-MMU-9716542	Signaling by Rho GTPases, Miro GTPases and RHOBTB3	-2.03138	-0.23582	8/667	12550,13836,15081,21763,22629,26413,97114,319153	Cdh1,Epha2,H3f3b,Tex2,Ywhah,Mapk1,H3c15,H3c11
8_Summary	GO Biological Processes	GO:0050730	regulation of peptidyl-tyrosine phosphorylation	-3.75118	-1.12292	7/266	13649,15163,19247,28084,67916,76303,217303,20598,20851	Egfr,Hcls1,Ptpn11,Vps25,Plpp3,Osbp,Cd300a,Smpd2,Stat5b
8_Member	GO Biological Processes	GO:0050730	regulation of peptidyl-tyrosine phosphorylation	-3.75118	-1.12292	7/266	13649,15163,19247,28084,67916,76303,217303	Egfr,Hcls1,Ptpn11,Vps25,Plpp3,Osbp,Cd300a
8_Member	GO Biological Processes	GO:0018108	peptidyl-tyrosine phosphorylation	-3.25075	-0.920551	7/322	13649,15163,19247,28084,67916,76303,217303	Egfr,Hcls1,Ptpn11,Vps25,Plpp3,Osbp,Cd300a
8_Member	GO Biological Processes	GO:0018212	peptidyl-tyrosine modification	-3.22692	-0.920551	7/325	13649,15163,19247,28084,67916,76303,217303	Egfr,Hcls1,Ptpn11,Vps25,Plpp3,Osbp,Cd300a
8_Member	Reactome Gene Sets	R-MMU-428157	Sphingolipid metabolism	-2.22707	-0.365742	3/83	20598,67916,76303	Smpd2,Plpp3,Osbp
8_Member	GO Biological Processes	GO:0007259	receptor signaling pathway via JAK-STAT	-2.0065	-0.224665	4/189	15163,20851,76303,217303	Hcls1,Stat5b,Osbp,Cd300a
9_Summary	GO Biological Processes	GO:0046628	positive regulation of insulin receptor signaling pathway	-3.74849	-1.12292	3/25	17118,19247,237542,11747,15163,20704,20851,22629,26413,26569,235041,72183,12550,13649,13836,28084	Marcks,Ptpn11,Osbpl8,Anxa5,Hcls1,Serpina1e,Stat5b,Ywhah,Mapk1,Slc27a4,Kank2,Snx6,Cdh1,Egfr,Epha2,Vps25
9_Member	GO Biological Processes	GO:0046628	positive regulation of insulin receptor signaling pathway	-3.74849	-1.12292	3/25	17118,19247,237542	Marcks,Ptpn11,Osbpl8
9_Member	GO Biological Processes	GO:1900078	positive regulation of cellular response to insulin stimulus	-3.50863	-1.05986	3/30	17118,19247,237542	Marcks,Ptpn11,Osbpl8
9_Member	GO Biological Processes	GO:0009725	response to hormone	-3.48992	-1.05066	11/719	11747,15163,17118,19247,20704,20851,22629,26413,26569,235041,237542	Anxa5,Hcls1,Marcks,Ptpn11,Serpina1e,Stat5b,Ywhah,Mapk1,Slc27a4,Kank2,Osbpl8
9_Member	GO Biological Processes	GO:1901653	cellular response to peptide	-3.37404	-0.984848	7/307	11747,17118,19247,20851,26569,72183,237542	Anxa5,Marcks,Ptpn11,Stat5b,Slc27a4,Snx6,Osbpl8
9_Member	GO Biological Processes	GO:0046626	regulation of insulin receptor signaling pathway	-3.36126	-0.983069	4/80	17118,19247,26569,237542	Marcks,Ptpn11,Slc27a4,Osbpl8
9_Member	GO Biological Processes	GO:1900076	regulation of cellular response to insulin stimulus	-3.34073	-0.973256	4/81	17118,19247,26569,237542	Marcks,Ptpn11,Slc27a4,Osbpl8
9_Member	GO Biological Processes	GO:1901652	response to peptide	-3.32852	-0.966315	8/411	11747,17118,19247,20704,20851,26569,72183,237542	Anxa5,Marcks,Ptpn11,Serpina1e,Stat5b,Slc27a4,Snx6,Osbpl8
9_Member	GO Biological Processes	GO:0071417	cellular response to organonitrogen compound	-3.26725	-0.930446	10/643	11747,12550,13649,17118,19247,20851,26413,26569,72183,237542	Anxa5,Cdh1,Egfr,Marcks,Ptpn11,Stat5b,Mapk1,Slc27a4,Snx6,Osbpl8
9_Member	GO Biological Processes	GO:0043434	response to peptide hormone	-3.03814	-0.809937	7/350	11747,17118,19247,20704,20851,26569,237542	Anxa5,Marcks,Ptpn11,Serpina1e,Stat5b,Slc27a4,Osbpl8
9_Member	GO Biological Processes	GO:0071375	cellular response to peptide hormone stimulus	-2.95896	-0.763117	6/263	11747,17118,19247,20851,26569,237542	Anxa5,Marcks,Ptpn11,Stat5b,Slc27a4,Osbpl8
9_Member	GO Biological Processes	GO:1901699	cellular response to nitrogen compound	-2.92035	-0.732929	10/714	11747,12550,13649,17118,19247,20851,26413,26569,72183,237542	Anxa5,Cdh1,Egfr,Marcks,Ptpn11,Stat5b,Mapk1,Slc27a4,Snx6,Osbpl8
9_Member	GO Biological Processes	GO:0007169	transmembrane receptor protein tyrosine kinase signaling pathway	-2.86598	-0.688496	9/602	13649,13836,17118,19247,20851,26413,26569,28084,237542	Egfr,Epha2,Marcks,Ptpn11,Stat5b,Mapk1,Slc27a4,Vps25,Osbpl8
9_Member	GO Biological Processes	GO:0032870	cellular response to hormone stimulus	-2.6793	-0.582247	8/519	11747,17118,19247,20851,22629,26569,235041,237542	Anxa5,Marcks,Ptpn11,Stat5b,Ywhah,Slc27a4,Kank2,Osbpl8
9_Member	GO Biological Processes	GO:0008286	insulin receptor signaling pathway	-2.60206	-0.551227	4/128	17118,19247,26569,237542	Marcks,Ptpn11,Slc27a4,Osbpl8
9_Member	GO Biological Processes	GO:0046323	glucose import	-2.18437	-0.337654	3/86	19247,26569,237542	Ptpn11,Slc27a4,Osbpl8
10_Summary	GO Biological Processes	GO:0043254	regulation of protein-containing complex assembly	-3.73941	-1.12292	9/455	11303,12562,15081,15163,19247,20362,20910,26420,72042	Abca1,Cdh5,H3f3b,Hcls1,Ptpn11,Septin8,Stxbp1,Mapk9,Cotl1
10_Member	GO Biological Processes	GO:0043254	regulation of protein-containing complex assembly	-3.73941	-1.12292	9/455	11303,12562,15081,15163,19247,20362,20910,26420,72042	Abca1,Cdh5,H3f3b,Hcls1,Ptpn11,Septin8,Stxbp1,Mapk9,Cotl1
11_Summary	GO Biological Processes	GO:0045931	positive regulation of mitotic cell cycle	-3.63422	-1.10881	5/125	11792,13649,19247,20479,20851,22629,235041	Apex1,Egfr,Ptpn11,Vps4b,Stat5b,Ywhah,Kank2
11_Member	GO Biological Processes	GO:0045931	positive regulation of mitotic cell cycle	-3.63422	-1.10881	5/125	11792,13649,19247,20479,20851	Apex1,Egfr,Ptpn11,Vps4b,Stat5b
11_Member	GO Biological Processes	GO:0007346	regulation of mitotic cell cycle	-2.37021	-0.435156	7/460	11792,13649,19247,20479,20851,22629,235041	Apex1,Egfr,Ptpn11,Vps4b,Stat5b,Ywhah,Kank2
11_Member	GO Biological Processes	GO:1901992	positive regulation of mitotic cell cycle phase transition	-2.12994	-0.303307	3/90	11792,13649,20479	Apex1,Egfr,Vps4b
12_Summary	KEGG Pathway	ko05100	Bacterial invasion of epithelial cells	-3.4463	-1.02834	4/76	12550,15163,16202,20362,26413,19247,12562,65969,238799,11981,13649,13836,11792,217303,237542,63913,22629	Cdh1,Hcls1,Ilk,Septin8,Mapk1,Ptpn11,Cdh5,Cubn,Tnpo1,Atp9a,Egfr,Epha2,Apex1,Cd300a,Osbpl8,Niban1,Ywhah
12_Member	KEGG Pathway	ko05100	Bacterial invasion of epithelial cells	-3.4463	-1.02834	4/76	12550,15163,16202,20362	Cdh1,Hcls1,Ilk,Septin8
12_Member	KEGG Pathway	mmu05100	Bacterial invasion of epithelial cells	-3.36126	-0.983069	4/80	12550,15163,16202,20362	Cdh1,Hcls1,Ilk,Septin8
12_Member	GO Biological Processes	GO:0042307	positive regulation of protein import into nucleus	-2.80321	-0.64578	3/52	12550,15163,26413	Cdh1,Hcls1,Mapk1
12_Member	GO Biological Processes	GO:1904591	positive regulation of protein import	-2.66655	-0.582247	3/58	12550,15163,26413	Cdh1,Hcls1,Mapk1
12_Member	GO Biological Processes	GO:0046822	regulation of nucleocytoplasmic transport	-2.58983	-0.546595	4/129	12550,15163,19247,26413	Cdh1,Hcls1,Ptpn11,Mapk1
12_Member	Reactome Gene Sets	R-MMU-446728	Cell junction organization	-2.52526	-0.525368	3/65	12550,12562,16202	Cdh1,Cdh5,Ilk
12_Member	GO Biological Processes	GO:0033157	regulation of intracellular protein transport	-2.50006	-0.508808	5/224	12550,15163,19247,20362,26413	Cdh1,Hcls1,Ptpn11,Septin8,Mapk1
12_Member	GO Biological Processes	GO:0017038	protein import	-2.47538	-0.49295	5/227	12550,15163,26413,65969,238799	Cdh1,Hcls1,Mapk1,Cubn,Tnpo1
12_Member	GO Biological Processes	GO:0032386	regulation of intracellular transport	-2.43251	-0.475505	6/335	11981,12550,15163,19247,20362,26413	Atp9a,Cdh1,Hcls1,Ptpn11,Septin8,Mapk1
12_Member	GO Biological Processes	GO:0046824	positive regulation of nucleocytoplasmic transport	-2.36619	-0.435156	3/74	12550,15163,26413	Cdh1,Hcls1,Mapk1
12_Member	GO Biological Processes	GO:0042306	regulation of protein import into nucleus	-2.30218	-0.401107	3/78	12550,15163,26413	Cdh1,Hcls1,Mapk1
12_Member	GO Biological Processes	GO:1904589	regulation of protein import	-2.21265	-0.35345	3/84	12550,15163,26413	Cdh1,Hcls1,Mapk1
12_Member	Reactome Gene Sets	R-MMU-1500931	Cell-Cell communication	-2.19842	-0.348497	3/85	12550,12562,16202	Cdh1,Cdh5,Ilk
12_Member	GO Biological Processes	GO:0006606	protein import into nucleus	-2.12975	-0.303307	4/174	12550,15163,26413,238799	Cdh1,Hcls1,Mapk1,Tnpo1
12_Member	GO Biological Processes	GO:1903829	positive regulation of cellular protein localization	-2.10759	-0.284836	5/278	12550,13649,13836,15163,26413	Cdh1,Egfr,Epha2,Hcls1,Mapk1
12_Member	GO Biological Processes	GO:1900182	positive regulation of protein localization to nucleus	-2.10372	-0.284836	3/92	12550,15163,26413	Cdh1,Hcls1,Mapk1
12_Member	GO Biological Processes	GO:0051170	import into nucleus	-2.09569	-0.278296	4/178	12550,15163,26413,238799	Cdh1,Hcls1,Mapk1,Tnpo1
12_Member	GO Biological Processes	GO:0030336	negative regulation of cell migration	-2.03298	-0.235994	5/290	11792,12550,16202,217303,237542	Apex1,Cdh1,Ilk,Cd300a,Osbpl8
12_Member	WikiPathways	WP1763	PluriNetWork: mechanisms associated with pluripotency	-2.02091	-0.228608	5/292	12550,19247,26413,63913,65969	Cdh1,Ptpn11,Mapk1,Niban1,Cubn
12_Member	Reactome Gene Sets	R-MMU-109581	Apoptosis	-2.00489	-0.224665	3/100	12550,22629,26413	Cdh1,Ywhah,Mapk1
13_Summary	Reactome Gene Sets	R-MMU-6798695	Neutrophil degranulation	-3.43157	-1.02535	9/501	11980,20719,26413,66848,67474,72042,74244,104112,217303	Atp8a1,Serpinb6a,Mapk1,Fuca2,Snap29,Cotl1,Atg7,Acly,Cd300a
13_Member	Reactome Gene Sets	R-MMU-6798695	Neutrophil degranulation	-3.43157	-1.02535	9/501	11980,20719,26413,66848,67474,72042,74244,104112,217303	Atp8a1,Serpinb6a,Mapk1,Fuca2,Snap29,Cotl1,Atg7,Acly,Cd300a
14_Summary	GO Biological Processes	GO:0045920	negative regulation of exocytosis	-3.34571	-0.973256	3/34	11981,20479,217303,16803,20910,26413,67474,72194,74244,108030	Atp9a,Vps4b,Cd300a,Lbp,Stxbp1,Mapk1,Snap29,Fbxl20,Atg7,Lin7a
14_Member	GO Biological Processes	GO:0045920	negative regulation of exocytosis	-3.34571	-0.973256	3/34	11981,20479,217303	Atp9a,Vps4b,Cd300a
14_Member	GO Biological Processes	GO:0060627	regulation of vesicle-mediated transport	-2.80702	-0.646311	9/614	11981,16803,20479,20910,26413,67474,72194,74244,217303	Atp9a,Lbp,Vps4b,Stxbp1,Mapk1,Snap29,Fbxl20,Atg7,Cd300a
14_Member	GO Biological Processes	GO:0006887	exocytosis	-2.61038	-0.551227	7/416	11981,20479,20910,67474,72194,108030,217303	Atp9a,Vps4b,Stxbp1,Snap29,Fbxl20,Lin7a,Cd300a
14_Member	GO Biological Processes	GO:0017157	regulation of exocytosis	-2.30557	-0.401107	5/249	11981,20479,20910,72194,217303	Atp9a,Vps4b,Stxbp1,Fbxl20,Cd300a
14_Member	GO Biological Processes	GO:0140029	exocytic process	-2.09085	-0.274951	3/93	20910,67474,217303	Stxbp1,Snap29,Cd300a
14_Member	GO Biological Processes	GO:0007269	neurotransmitter secretion	-2.01435	-0.228608	4/188	20910,67474,72194,108030	Stxbp1,Snap29,Fbxl20,Lin7a
14_Member	GO Biological Processes	GO:0099643	signal release from synapse	-2.01435	-0.228608	4/188	20910,67474,72194,108030	Stxbp1,Snap29,Fbxl20,Lin7a
15_Summary	KEGG Pathway	ko04666	Fc gamma R-mediated phagocytosis	-3.22305	-0.920551	4/87	17118,17357,26413,67916	Marcks,Marcksl1,Mapk1,Plpp3
15_Member	KEGG Pathway	ko04666	Fc gamma R-mediated phagocytosis	-3.22305	-0.920551	4/87	17118,17357,26413,67916	Marcks,Marcksl1,Mapk1,Plpp3
15_Member	KEGG Pathway	mmu04666	Fc gamma R-mediated phagocytosis	-3.18579	-0.908827	4/89	17118,17357,26413,67916	Marcks,Marcksl1,Mapk1,Plpp3
16_Summary	KEGG Pathway	ko04975	Fat digestion and absorption	-3.13625	-0.876161	3/40	11303,26569,67916,65969,235041	Abca1,Slc27a4,Plpp3,Cubn,Kank2
16_Member	KEGG Pathway	ko04975	Fat digestion and absorption	-3.13625	-0.876161	3/40	11303,26569,67916	Abca1,Slc27a4,Plpp3
16_Member	KEGG Pathway	mmu04975	Fat digestion and absorption	-3.10464	-0.856779	3/41	11303,26569,67916	Abca1,Slc27a4,Plpp3
16_Member	GO Biological Processes	GO:0007584	response to nutrient	-2.60384	-0.551227	3/61	26569,65969,235041	Slc27a4,Cubn,Kank2
17_Summary	GO Biological Processes	GO:0007431	salivary gland development	-3.10464	-0.856779	3/41	12550,12724,13649,13836,56373	Cdh1,Clcn2,Egfr,Epha2,Cpb2
17_Member	GO Biological Processes	GO:0007431	salivary gland development	-3.10464	-0.856779	3/41	12550,12724,13649	Cdh1,Clcn2,Egfr
17_Member	GO Biological Processes	GO:0035272	exocrine system development	-2.75584	-0.629525	3/54	12550,12724,13649	Cdh1,Clcn2,Egfr
17_Member	GO Biological Processes	GO:0022612	gland morphogenesis	-2.30505	-0.401107	4/155	12550,13649,13836,56373	Cdh1,Egfr,Epha2,Cpb2
18_Summary	GO Biological Processes	GO:0016050	vesicle organization	-2.7889	-0.637883	6/284	11303,20362,20479,20910,67474,76303,11981,28084,72183,19247,217303	Abca1,Septin8,Vps4b,Stxbp1,Snap29,Osbp,Atp9a,Vps25,Snx6,Ptpn11,Cd300a
18_Member	GO Biological Processes	GO:0016050	vesicle organization	-2.7889	-0.637883	6/284	11303,20362,20479,20910,67474,76303	Abca1,Septin8,Vps4b,Stxbp1,Snap29,Osbp
18_Member	GO Biological Processes	GO:0016197	endosomal transport	-2.47538	-0.49295	5/227	11303,11981,20479,28084,72183	Abca1,Atp9a,Vps4b,Vps25,Snx6
18_Member	GO Biological Processes	GO:0015850	organic hydroxy compound transport	-2.08229	-0.269349	5/282	11303,19247,20479,76303,217303	Abca1,Ptpn11,Vps4b,Osbp,Cd300a
19_Summary	GO Biological Processes	GO:0070848	response to growth factor	-2.59453	-0.547496	9/660	12562,13405,13649,13836,16202,19247,20851,26413,72183,15081,16667,12550,20719,11980,16803,67916,11979	Cdh5,Dmd,Egfr,Epha2,Ilk,Ptpn11,Stat5b,Mapk1,Snx6,H3f3b,Krt17,Cdh1,Serpinb6a,Atp8a1,Lbp,Plpp3,Atp7b
19_Member	GO Biological Processes	GO:0070848	response to growth factor	-2.59453	-0.547496	9/660	12562,13405,13649,13836,16202,19247,20851,26413,72183	Cdh5,Dmd,Egfr,Epha2,Ilk,Ptpn11,Stat5b,Mapk1,Snx6
19_Member	GO Biological Processes	GO:0045927	positive regulation of growth	-2.52335	-0.525368	6/321	13649,15081,16202,16667,20851,26413	Egfr,H3f3b,Ilk,Krt17,Stat5b,Mapk1
19_Member	GO Biological Processes	GO:0048608	reproductive structure development	-2.26585	-0.380769	7/481	12550,13649,15081,19247,20719,20851,26413	Cdh1,Egfr,H3f3b,Ptpn11,Serpinb6a,Stat5b,Mapk1
19_Member	GO Biological Processes	GO:0061458	reproductive system development	-2.24665	-0.373251	7/485	12550,13649,15081,19247,20719,20851,26413	Cdh1,Egfr,H3f3b,Ptpn11,Serpinb6a,Stat5b,Mapk1
19_Member	GO Biological Processes	GO:0051272	positive regulation of cellular component movement	-2.24288	-0.373251	8/613	11980,12562,13649,16202,16803,20851,26413,67916	Atp8a1,Cdh5,Egfr,Ilk,Lbp,Stat5b,Mapk1,Plpp3
19_Member	GO Biological Processes	GO:0030879	mammary gland development	-2.20985	-0.35345	4/165	11979,13836,20851,26413	Atp7b,Epha2,Stat5b,Mapk1
19_Member	GO Biological Processes	GO:0007565	female pregnancy	-2.17363	-0.331697	4/169	12550,15081,20851,26413	Cdh1,H3f3b,Stat5b,Mapk1
20_Summary	GO Biological Processes	GO:0001954	positive regulation of cell-matrix adhesion	-2.56387	-0.542074	3/63	13405,16202,19247,13836,67916,28084,63913,217303,74244	Dmd,Ilk,Ptpn11,Epha2,Plpp3,Vps25,Niban1,Cd300a,Atg7
20_Member	GO Biological Processes	GO:0001954	positive regulation of cell-matrix adhesion	-2.56387	-0.542074	3/63	13405,16202,19247	Dmd,Ilk,Ptpn11
20_Member	GO Biological Processes	GO:0033627	cell adhesion mediated by integrin	-2.36619	-0.435156	3/74	13836,19247,67916	Epha2,Ptpn11,Plpp3
20_Member	GO Biological Processes	GO:0001933	negative regulation of protein phosphorylation	-2.3343	-0.422114	6/351	13405,16202,28084,63913,67916,217303	Dmd,Ilk,Vps25,Niban1,Plpp3,Cd300a
20_Member	GO Biological Processes	GO:0042326	negative regulation of phosphorylation	-2.07579	-0.2658	6/398	13405,16202,28084,63913,67916,217303	Dmd,Ilk,Vps25,Niban1,Plpp3,Cd300a
20_Member	GO Biological Processes	GO:0031400	negative regulation of protein modification process	-2.06557	-0.259958	7/525	13405,16202,28084,63913,67916,74244,217303	Dmd,Ilk,Vps25,Niban1,Plpp3,Atg7,Cd300a
20_Member	GO Biological Processes	GO:0007229	integrin-mediated signaling pathway	-2.05315	-0.248989	3/96	16202,19247,67916	Ilk,Ptpn11,Plpp3
