# Supplementary material for: Acute exercise dynamically modulates the hepatic mitochondrial proteome
Source: Royal Society of Chemistry journal article supplement (doi:10.1039/d2mo00143h), 2022-07-29
Supplement: d2mo00143h7.xlsx [file d2mo00143h7.xlsx]

## Sheet: Sheet1
Supplemental Table 7.The Qprot results for the comparison between time points. The results from t-SNE (clusterNum) are showing in here.
Protein	Gene names	Zstatistic_leupeptin_ex_0_2	Zstatistic_leupeptin_sed_0_2	Zstatistic_saline_ex_0_2	Zstatistic_saline_sed_0_2	V1	V2	V3	V4	clusterNum
A0A0B4J1G0	Fcgr4	-2.0111	-0.9435	0.7937	0.1704	-2.0111	-0.9435	0.7937	0.1704	3
A0JNU3	Aspg	-0.4696	-0.4246	0.7419	-1.5764	-0.4696	-0.4246	0.7419	-1.5764	3
A1L314	Mpeg1	-1.0924	-1.289	2.0965	1.1705	-1.0924	-1.289	2.0965	1.1705	3
A1L317	Krt24	-1.7778	-0.731	0.3089	0.4503	-1.7778	-0.731	0.3089	0.4503	3
A2A5R2	Arfgef2	0.8282	-0.0991	1.1383	2.4687	0.8282	-0.0991	1.1383	2.4687	4
A2A8L5	Ptprf	-0.9627	0.3657	-0.6166	-1.7123	-0.9627	0.3657	-0.6166	-1.7123	2
A2ADY9	Ddi2	1.9328	0.3575	-0.9333	-1.3417	1.9328	0.3575	-0.9333	-1.3417	2
A2AGT5	Ckap5	0.9088	0.5003	2.582	2.5664	0.9088	0.5003	2.582	2.5664	4
A2AIL4	Ndufaf6	0.7088	-0.0246	-0.2136	-0.6302	0.7088	-0.0246	-0.2136	-0.6302	2
A2AJ15	Man1b1	0.6288	-1.5655	0.6076	0.7302	0.6288	-1.5655	0.6076	0.7302	4
A2AJ88	Pnpla7	-0.3256	0.2982	-0.2303	2.356	-0.3256	0.2982	-0.2303	2.356	4
A2AJL3	Fggy	0.264	0.5123	-0.2078	-0.01	0.264	0.5123	-0.2078	-0.01	1
A2AKK5	Acnat1	-1.8779	-0.6966	0.6535	1.115	-1.8779	-0.6966	0.6535	1.115	3
A2AKQ0	Slc35d1	-0.6881	0.3644	0.1015	0.9257	-0.6881	0.3644	0.1015	0.9257	4
A2ALW5	Dnajc25	0.2333	-0.3518	0.3581	0.5366	0.2333	-0.3518	0.3581	0.5366	4
A2AN08	Ubr4	0.0699	0.7245	0.1318	-1.1623	0.0699	0.7245	0.1318	-1.1623	1
A2APT9	Klhdc7a	0.5363	-4.2761	0.5966	1.8099	0.5363	-4.2761	0.5966	1.8099	3
A2APV2	Fmnl2	0.4563	-0.1004	0.011	0.5402	0.4563	-0.1004	0.011	0.5402	1
A2APY7	Ndufaf5	-1.683	-0.9987	0.389	0.8231	-1.683	-0.9987	0.389	0.8231	3
A2ARV4	Lrp2	-1.0148	0.3456	-0.8451	0.7715	-1.0148	0.3456	-0.8451	0.7715	1
A2AS89	Agmat	0.0679	-0.7389	0.9915	0.2553	0.0679	-0.7389	0.9915	0.2553	3
A2ASZ8	Slc25a25	-0.8905	-0.4044	-0.1195	0.704	-0.8905	-0.4044	-0.1195	0.704	3
A2ATU0	Dhtkd1	-0.3839	-0.4992	-0.1226	-0.3982	-0.3839	-0.4992	-0.1226	-0.3982	3
A2AVZ9	Slc43a3	-1.9859	0.1171	0.7163	0.9056	-1.9859	0.1171	0.7163	0.9056	3
A2CG49	Kalrn	-0.5356	0.38	-1.3277	-0.1217	-0.5356	0.38	-1.3277	-0.1217	2
A3KMP2	Ttc38	0.708	-0.2333	0.2407	-1.644	0.708	-0.2333	0.2407	-1.644	2
A6H611	Mipep	-0.301	-0.2649	0.9578	-0.0972	-0.301	-0.2649	0.9578	-0.0972	3
A6X919	Dpy19l1	-0.472	0.3139	1.0365	0.7547	-0.472	0.3139	1.0365	0.7547	4
A6X935	Itih4	1.3164	2.2018	0.5189	2.0021	1.3164	2.2018	0.5189	2.0021	1
A7MCT6	Etnk2	-0.4154	2.0103	-0.7801	-0.5223	-0.4154	2.0103	-0.7801	-0.5223	2
B1AUE5	Pex10	-0.7498	0.5418	0.6766	0.4142	-0.7498	0.5418	0.6766	0.4142	4
B1AY13	Usp24	1.4225	0.9654	0.332	3.2681	1.4225	0.9654	0.332	3.2681	1
B2RPV6	Mmrn1	0.1145	-0.3331	-0.1885	-0.821	0.1145	-0.3331	-0.1885	-0.821	2
B2RQC6	Cad	-0.6819	-0.7294	1.4087	0.6631	-0.6819	-0.7294	1.4087	0.6631	3
B2RX12	Abcc3	-0.1941	0.4947	0.2546	0.0407	-0.1941	0.4947	0.2546	0.0407	3
B2RXC1	Trappc11	-0.8805	-1.1233	0.6972	-0.0611	-0.8805	-1.1233	0.6972	-0.0611	3
B2RXS4	Plxnb2	-1.208	-0.8016	-0.4726	-1.5013	-1.208	-0.8016	-0.4726	-1.5013	2
B7ZMP1	Xpnpep3	0.0941	-0.3521	0.5195	1.0254	0.0941	-0.3521	0.5195	1.0254	4
B9EJ86	Osbpl8	-0.0148	0.114	-1.0698	-0.3385	-0.0148	0.114	-1.0698	-0.3385	2
C0HKE2	Hist1h2ac	-0.0832	-0.9287	-0.4734	-0.7902	-0.0832	-0.9287	-0.4734	-0.7902	2
C0HKE3	Hist1h2ad	-0.0319	-0.9961	-0.3372	-0.8301	-0.0319	-0.9961	-0.3372	-0.8301	2
C0HKE4	Hist1h2ae	-0.0019	-0.9049	-0.4596	-0.7889	-0.0019	-0.9049	-0.4596	-0.7889	2
C0HKE5	Hist1h2ag	-0.0577	-1.0454	-0.4974	-0.8969	-0.0577	-1.0454	-0.4974	-0.8969	2
C0HKE6	Hist1h2ai	0.0382	-0.9722	-0.3593	-0.7543	0.0382	-0.9722	-0.3593	-0.7543	2
C0HKE7	Hist1h2an	-0.15	-0.9256	-0.4773	-0.7905	-0.15	-0.9256	-0.4773	-0.7905	2
C0HKE8	Hist1h2ao	-0.063	-0.9449	-0.3776	-0.7667	-0.063	-0.9449	-0.3776	-0.7667	2
C0HKE9	Hist1h2ap	0.0167	-0.9474	-0.4031	-0.8613	0.0167	-0.9474	-0.4031	-0.8613	2
C0HKG6	Rnaset2b	-0.819	-1.0749	1.0702	2.3095	-0.819	-1.0749	1.0702	2.3095	4
D3Z6P0	Pdia2	0.1536	-1.5226	-0.7938	-0.0645	0.1536	-1.5226	-0.7938	-0.0645	3
D3Z7P3	Gls	-0.5639	-1.165	0.5747	0.3317	-0.5639	-1.165	0.5747	0.3317	3
E9PV24	Fga	1.4334	1.2698	-0.982	-0.1158	1.4334	1.2698	-0.982	-0.1158	1
E9PVA8	Gcn1	0.4264	0.672	0.5169	0.0661	0.4264	0.672	0.5169	0.0661	1
E9PYK3	Parp4	-0.4329	-0.7069	-0.7161	2.451	-0.4329	-0.7069	-0.7161	2.451	4
E9PZJ8	Ascc3	-0.3386	0.8493	0.3931	0.3236	-0.3386	0.8493	0.3931	0.3236	4
E9Q3C1	C2cd2	0.3503	0.0046	1.861	0.1539	0.3503	0.0046	1.861	0.1539	4
E9Q3L2	Pi4ka	-1.2597	-0.3799	1.0749	0.6247	-1.2597	-0.3799	1.0749	0.6247	3
E9Q414	Apob	7.0844	2.4369	0.3115	0.7012	7.0844	2.4369	0.3115	0.7012	1
E9Q4Z2	Acacb	0.7793	-0.2633	0.2809	0.3024	0.7793	-0.2633	0.2809	0.3024	1
E9Q555	Rnf213	-0.4192	-0.4711	0.6551	0.4012	-0.4192	-0.4711	0.6551	0.4012	3
E9Q557	Dsp	-1.4555	-0.848	-0.334	-0.6276	-1.4555	-0.848	-0.334	-0.6276	3
E9Q634	Myo1e	0.2004	-0.7236	2.0035	0.2706	0.2004	-0.7236	2.0035	0.2706	4
E9Q735	Ube4a	0.6854	1.4191	0.7408	0.937	0.6854	1.4191	0.7408	0.937	1
E9QAM5	Helz2	-1.0939	-0.8949	1.0518	-0.1351	-1.0939	-0.8949	1.0518	-0.1351	3
E9QAT4	Sec16a	0.3034	-0.0216	-0.0093	-0.8821	0.3034	-0.0216	-0.0093	-0.8821	2
F8VPU2	Farp1	-1.9777	-0.366	-0.5741	-1.3651	-1.9777	-0.366	-0.5741	-1.3651	2
G3X982	Aox3	0.4956	-0.2591	0.3728	-1.9847	0.4956	-0.2591	0.3728	-1.9847	2
G5E829	Atp2b1	-1.5292	-0.7692	-0.2368	0.0097	-1.5292	-0.7692	-0.2368	0.0097	3
G5E897	Poglut3	0.4496	0.8828	-1.8916	-0.5251	0.4496	0.8828	-1.8916	-0.5251	2
G5E8K5	Ank3	-0.4035	0.3777	-1.9843	-0.3809	-0.4035	0.3777	-1.9843	-0.3809	2
O08528	Hk2	-1.3781	-1.6002	1.7193	0.6362	-1.3781	-1.6002	1.7193	0.6362	3
O08529	Capn2	-0.9397	-1.0236	0.5417	-1.034	-0.9397	-1.0236	0.5417	-1.034	3
O08547	Sec22b	-0.1299	1.6567	-1.1635	-0.9953	-0.1299	1.6567	-1.1635	-0.9953	2
O08553	Dpysl2	0.0601	-1.0781	1.3302	-2.3245	0.0601	-1.0781	1.3302	-2.3245	2
O08573	Lgals9	3.2459	0.8336	-1.8573	-1.7494	3.2459	0.8336	-1.8573	-1.7494	2
O08579	Emd	1.2428	1.5892	-0.5776	0.3191	1.2428	1.5892	-0.5776	0.3191	1
O08582	Gtpbp1	0.1292	-0.6615	-0.5301	-2.2339	0.1292	-0.6615	-0.5301	-2.2339	2
O08585	Clta	-0.8025	0.1109	-2.0332	-2.4875	-0.8025	0.1109	-2.0332	-2.4875	2
O08599	Stxbp1	-1.3288	-0.4006	-0.479	-1.4722	-1.3288	-0.4006	-0.479	-1.4722	2
O08600	Endog	-0.0368	-0.3489	-0.4726	-0.6683	-0.0368	-0.3489	-0.4726	-0.6683	2
O08601	Mttp	0.1949	0.4789	0.8514	1.4881	0.1949	0.4789	0.8514	1.4881	4
O08638	Myh11	-0.077	-1.2719	0.3185	-0.0364	-0.077	-1.2719	0.3185	-0.0364	3
O08663	Metap2	-0.034	-0.645	-0.2485	0.1769	-0.034	-0.645	-0.2485	0.1769	3
O08677	Kng1	1.3427	0.2751	-1.5337	-1.0242	1.3427	0.2751	-1.5337	-1.0242	2
O08691	Arg2	0.5574	-1.1873	-0.6399	-1.9566	0.5574	-1.1873	-0.6399	-1.9566	2
O08692	Ngp	-2.1851	0.0277	-1.4779	-0.8315	-2.1851	0.0277	-1.4779	-0.8315	2
O08705	Slc10a1	0.2932	0.2187	-0.4693	-1.7443	0.2932	0.2187	-0.4693	-1.7443	2
O08709	Prdx6	1.1833	0.2655	-1.3259	-2.7728	1.1833	0.2655	-1.3259	-2.7728	2
O08715	Akap1	0.6138	1.0822	-0.9182	0.7053	0.6138	1.0822	-0.9182	0.7053	1
O08734	Bak1	-1.8911	-2.2375	2.2617	1.2738	-1.8911	-2.2375	2.2617	1.2738	3
O08738	Casp6	-0.8797	0.7475	-1.1901	-0.2455	-0.8797	0.7475	-1.1901	-0.2455	2
O08749	Dld	-0.1452	-0.8401	-0.1883	-0.1355	-0.1452	-0.8401	-0.1883	-0.1355	3
O08756	Hsd17b10	0.2255	0.1283	-1.4536	-0.8902	0.2255	0.1283	-1.4536	-0.8902	2
O08788	Dctn1	-0.1322	-0.7408	0.0441	-0.5238	-0.1322	-0.7408	0.0441	-0.5238	3
O08795	Prkcsh	1.0344	0.7573	-0.1065	1.0523	1.0344	0.7573	-0.1065	1.0523	1
O08800	Serpinb8	-0.2988	1.5474	-0.909	0.2722	-0.2988	1.5474	-0.909	0.2722	1
O08807	Prdx4	1.105	0.2788	1.1595	1.461	1.105	0.2788	1.1595	1.461	1
O08808	Diaph1	1.2925	-1.1629	2.4201	0.4904	1.2925	-1.1629	2.4201	0.4904	4
O08832	Galnt4	-0.3151	-0.1143	0.4254	1.271	-0.3151	-0.1143	0.4254	1.271	4
O08912	Galnt1	-0.0174	0.3958	1.0691	1.5061	-0.0174	0.3958	1.0691	1.5061	4
O08914	Faah	0.0191	-0.1829	1.4176	2.2036	0.0191	-0.1829	1.4176	2.2036	4
O08917	Flot1	-0.7057	-1.1811	-0.4958	-0.2514	-0.7057	-1.1811	-0.4958	-0.2514	3
O08966	Slc22a1	-0.9192	0.5435	0.4485	-0.3537	-0.9192	0.5435	0.4485	-0.3537	4
O08997	Atox1	0.3001	0.1829	-0.8613	-0.2032	0.3001	0.1829	-0.8613	-0.2032	1
O09005	Degs1	-1.7127	-0.8199	1.1183	1.1557	-1.7127	-0.8199	1.1183	1.1557	3
O09012	Pex5	-0.8508	0.1393	0.3391	0.2131	-0.8508	0.1393	0.3391	0.2131	4
O09043	Napsa	-1.1934	-1.1331	-0.0545	3.3302	-1.1934	-1.1331	-0.0545	3.3302	4
O09044	Snap23	-0.3896	-0.1374	-0.2392	-0.7868	-0.3896	-0.1374	-0.2392	-0.7868	2
O09061	Psmb1	0.8982	0.1854	-1.2108	-3.6174	0.8982	0.1854	-1.2108	-3.6174	2
O09111	Ndufb11	-1.0427	0.3522	0.3142	0.058	-1.0427	0.3522	0.3142	0.058	4
O09117	Sypl1	-0.5701	-0.5851	-1.1212	0.7652	-0.5701	-0.5851	-1.1212	0.7652	2
O09131	Gsto1	1.4964	0.7951	-2.1258	-1.3472	1.4964	0.7951	-2.1258	-1.3472	2
O09158	Cyp3a25	0.4016	1.2283	0.6903	0.9039	0.4016	1.2283	0.6903	0.9039	1
O09159	Man2b1	-0.6813	-0.8804	2.1495	2.8922	-0.6813	-0.8804	2.1495	2.8922	4
O09164	Sod3	1.017	0.4579	-0.752	-0.6561	1.017	0.4579	-0.752	-0.6561	1
O09167	Rpl21	0.1131	0.4413	-0.451	0.2721	0.1131	0.4413	-0.451	0.2721	1
O09172	Gclm	0.7064	0.9968	0.5383	-0.7917	0.7064	0.9968	0.5383	-0.7917	1
O09173	Hgd	0.2871	-0.5429	0.6386	-0.1222	0.2871	-0.5429	0.6386	-0.1222	3
O09174	Amacr	-0.7641	-0.3271	-0.2122	-0.7411	-0.7641	-0.3271	-0.2122	-0.7411	3
O35071	Kif1c	0.0089	0.0433	0.2214	-1.1268	0.0089	0.0433	0.2214	-1.1268	3
O35074	Ptgis	0.7853	-1.7357	1.1316	-0.5049	0.7853	-1.7357	1.1316	-0.5049	3
O35075	Vps26c	-0.1524	0.0322	-0.2985	1.3096	-0.1524	0.0322	-0.2985	1.3096	4
O35098	Dpysl4	0.358	0.3822	-0.3815	-1.4769	0.358	0.3822	-0.3815	-1.4769	2
O35114	Scarb2	0.0593	0.0367	3.4541	2.7773	0.0593	0.0367	3.4541	2.7773	4
O35129	Phb2	-0.9232	-0.0966	0.5646	0.0715	-0.9232	-0.0966	0.5646	0.0715	3
O35166	Gosr2	-0.0864	0.6282	-0.3065	0.439	-0.0864	0.6282	-0.3065	0.439	1
O35215	Ddt	1.2412	1.0528	-1.1022	-2.2186	1.2412	1.0528	-1.1022	-2.2186	2
O35226	Psmd4	0.808	0.5655	-1.149	-1.9909	0.808	0.5655	-1.149	-1.9909	2
O35239	Ptpn9	0.1219	0.5659	1.4809	-0.816	0.1219	0.5659	1.4809	-0.816	1
O35250	Exoc7	0.4601	-1.7229	-0.676	-0.2941	0.4601	-1.7229	-0.676	-0.2941	3
O35286	Dhx15	0.5842	0.4719	1.4187	-0.3615	0.5842	0.4719	1.4187	-0.3615	1
O35295	Purb	-0.302	0.3402	-1.6459	0.9456	-0.302	0.3402	-1.6459	0.9456	4
O35309	Nmi	-0.7236	-2.6045	-0.0342	-1.06	-0.7236	-2.6045	-0.0342	-1.06	3
O35316	Slc6a6	-0.647	-1.7871	0.4563	-0.3607	-0.647	-1.7871	0.4563	-0.3607	3
O35326	Srsf5	-0.3682	-1.628	0.0088	-0.1935	-0.3682	-1.628	0.0088	-0.1935	3
O35345	Kpna6	-0.0493	-0.5559	0.3749	-1.328	-0.0493	-0.5559	0.3749	-1.328	3
O35350	Capn1	0.2768	-0.976	1.3505	1.5534	0.2768	-0.976	1.3505	1.5534	4
O35381	Anp32a	0.9805	0.4908	0.4153	0.0401	0.9805	0.4908	0.4153	0.0401	1
O35382	Exoc4	2.3844	0.5235	0.368	0.1851	2.3844	0.5235	0.368	0.1851	1
O35386	Phyh	1.3984	0.4237	-2.4582	-1.5888	1.3984	0.4237	-2.4582	-1.5888	2
O35387	Hax1	0.3883	0.9976	-0.3908	-1.1224	0.3883	0.9976	-0.3908	-1.1224	1
O35403	Sult3a1	-0.2122	0.2129	0.8417	-0.8136	-0.2122	0.2129	0.8417	-0.8136	1
O35405	Pld3	-1.309	-1.0297	1.9457	2.3308	-1.309	-1.0297	1.9457	2.3308	4
O35423	Agxt	0.1565	0.1655	0.2346	-0.6962	0.1565	0.1655	0.2346	-0.6962	1
O35435	Dhodh	0.1756	0.1144	-0.1208	-1.3635	0.1756	0.1144	-0.1208	-1.3635	2
O35448	Ppt2	1.395	-1.0504	1.5325	3.6071	1.395	-1.0504	1.5325	3.6071	4
O35453	Hpn	1.0089	0.4146	-0.2326	0.328	1.0089	0.4146	-0.2326	0.328	1
O35459	Ech1	0.1183	0.0434	1.2079	1.2173	0.1183	0.0434	1.2079	1.2173	4
O35465	Fkbp8	0.3692	1.1627	-3.163	-2.6788	0.3692	1.1627	-3.163	-2.6788	2
O35488	Slc27a2	-0.0438	0.306	-0.0001	1.118	-0.0438	0.306	-0.0001	1.118	1
O35490	Bhmt	-0.1001	-0.1593	-1.3037	-1.4561	-0.1001	-0.1593	-1.3037	-1.4561	2
O35593	Psmd14	0.1999	-1.0049	-1.2866	-3.1668	0.1999	-1.0049	-1.2866	-3.1668	2
O35598	Adam10	-1.0633	-0.57	0.058	1.3209	-1.0633	-0.57	0.058	1.3209	4
O35604	Npc1	0.0022	0.2444	2.125	3.2617	0.0022	0.2444	2.125	3.2617	4
O35609	Scamp3	-0.0421	0.4424	-0.1134	-0.6499	-0.0421	0.4424	-0.1134	-0.6499	1
O35639	Anxa3	-1.1164	-1.7663	-0.0173	-2.2656	-1.1164	-1.7663	-0.0173	-2.2656	2
O35643	Ap1b1	-0.6952	-0.6991	-1.1472	0.1052	-0.6952	-0.6991	-1.1472	0.1052	2
O35657	Neu1	-0.23	-0.9683	0.4326	1.3036	-0.23	-0.9683	0.4326	1.3036	4
O35658	C1qbp	-0.5521	-0.7563	1.1379	0.4614	-0.5521	-0.7563	1.1379	0.4614	3
O35660	Gstm6	0.0564	-0.0417	1.415	-2.0613	0.0564	-0.0417	1.415	-2.0613	1
O35678	Mgll	0.6201	1.2459	-0.5897	0.6044	0.6201	1.2459	-0.5897	0.6044	1
O35682	Myadm	-1.1425	0.5963	-0.2073	-1.2348	-1.1425	0.5963	-0.2073	-1.2348	2
O35685	Nudc	-0.1594	-1.0943	-1.6421	-0.4824	-0.1594	-1.0943	-1.6421	-0.4824	2
O35711	Ppfibp2	-1.0088	1.122	0.7949	0.3101	-1.0088	1.122	0.7949	0.3101	4
O35728	Cyp4a14	0.4706	1.1147	0.3727	1.2863	0.4706	1.1147	0.3727	1.2863	1
O35737	Hnrnph1	1.6638	-0.2472	-1.1913	-1.0731	1.6638	-0.2472	-1.1913	-1.0731	2
O35744	Chil3	-4.1798	-0.7753	-0.165	0.7875	-4.1798	-0.7753	-0.165	0.7875	3
O35855	Bcat2	-0.9558	-2.1132	-0.2328	0.445	-0.9558	-2.1132	-0.2328	0.445	3
O35857	Timm44	-0.8185	-0.3401	0.592	0.2173	-0.8185	-0.3401	0.592	0.2173	3
O35864	Cops5	0.3521	0.7613	-1.9569	0.6251	0.3521	0.7613	-1.9569	0.6251	1
O35887	Calu	0.0524	-0.1798	-0.1555	0.1215	0.0524	-0.1798	-0.1555	0.1215	1
O35943	Fxn	-0.2474	-0.4995	-0.0806	-0.2793	-0.2474	-0.4995	-0.0806	-0.2793	3
O35945	Aldh1a7	0.351	0.4355	0.1036	-0.7295	0.351	0.4355	0.1036	-0.7295	1
O35955	Psmb10	0.3721	-1.0402	-0.5182	-1.4158	0.3721	-1.0402	-0.5182	-1.4158	2
O35963	Rab33b	-0.1651	0.0699	1.7218	1.3381	-0.1651	0.0699	1.7218	1.3381	4
O35969	Gamt	0.6746	0.1934	-0.6921	-3.7637	0.6746	0.1934	-0.6921	-3.7637	2
O35972	Mrpl23	-0.6632	-1.1594	-0.9993	-0.6006	-0.6632	-1.1594	-0.9993	-0.6006	2
O35988	Sdc4	4.4049	2.4718	0.449	0.9751	4.4049	2.4718	0.449	0.9751	1
O54692	Zw10	-0.0834	-0.6382	0.6683	-0.7349	-0.0834	-0.6382	0.6683	-0.7349	3
O54734	Ddost	-0.1598	0.2823	0.2809	0.379	-0.1598	0.2823	0.2809	0.379	3
O54749	Cyp2j5	-0.3031	1.7716	-0.0452	-0.755	-0.3031	1.7716	-0.0452	-0.755	1
O54750	Cyp2j6	0.1933	-0.8926	-0.8431	0.0621	0.1933	-0.8926	-0.8431	0.0621	2
O54774	Ap3d1	-0.1107	-0.0158	2.6032	1.1184	-0.1107	-0.0158	2.6032	1.1184	4
O54782	Man2b2	-1.0015	-0.9642	1.504	2.3264	-1.0015	-0.9642	1.504	2.3264	4
O54865	Gucy1b1	0.3398	-0.7025	0.0311	0.113	0.3398	-0.7025	0.0311	0.113	2
O54890	Itgb3	-1.2964	-1.2525	0.1499	-0.579	-1.2964	-1.2525	0.1499	-0.579	3
O54909	Rdh16	0.0704	-0.2501	0.233	1.7981	0.0704	-0.2501	0.233	1.7981	4
O54950	Prkag1	-0.8275	-1.7231	0.014	-0.1003	-0.8275	-1.7231	0.014	-0.1003	3
O54962	Banf1	0.6845	0.7414	0.7875	1.0432	0.6845	0.7414	0.7875	1.0432	1
O54984	Asna1	-0.3847	0.8375	-1.3148	-0.052	-0.3847	0.8375	-1.3148	-0.052	2
O55003	Bnip3	1.1214	1.261	-3.9535	-1.1044	1.1214	1.261	-3.9535	-1.1044	2
O55013	Trappc3	-0.6902	-0.4601	-1.3028	-0.4372	-0.6902	-0.4601	-1.3028	-0.4372	2
O55022	Pgrmc1	-0.2725	0.205	-0.1956	0.4916	-0.2725	0.205	-0.1956	0.4916	4
O55023	Impa1	1.4864	-0.0201	0.247	-0.8491	1.4864	-0.0201	0.247	-0.8491	1
O55026	Entpd2	-1.1491	-0.1984	-0.5163	0.5201	-1.1491	-0.1984	-0.5163	0.5201	3
O55029	Copb2	-0.7537	-0.8325	1.1449	0.1487	-0.7537	-0.8325	1.1449	0.1487	3
O55060	Tpmt	-0.5775	-1.0763	0.9796	-0.3582	-0.5775	-1.0763	0.9796	-0.3582	3
O55070	Dnase1l3	1.1119	0.5715	-0.0803	-0.504	1.1119	0.5715	-0.0803	-0.504	1
O55071	Cyp2b19	-0.3785	0.3663	1.2192	-0.9683	-0.3785	0.3663	1.2192	-0.9683	1
O55111	Dsg2	0.6816	0.8951	-1.6593	-4.0038	0.6816	0.8951	-1.6593	-4.0038	2
O55125	Nipsnap1	-0.0562	-0.5136	0.0339	-0.7397	-0.0562	-0.5136	0.0339	-0.7397	3
O55126	Nipsnap2	-0.7879	-0.9917	-0.2749	-0.2548	-0.7879	-0.9917	-0.2749	-0.2548	3
O55131	Septin7	-0.2079	-0.8718	1.9867	0.4219	-0.2079	-0.8718	1.9867	0.4219	4
O55142	Rpl35a	-0.1126	0.6079	0.1065	0.8299	-0.1126	0.6079	0.1065	0.8299	1
O55143	Atp2a2	-0.3498	0.0036	-1.1695	-0.519	-0.3498	0.0036	-1.1695	-0.519	2
O55222	Ilk	-0.1102	-2.0714	-1.2236	-0.5938	-0.1102	-2.0714	-1.2236	-0.5938	3
O55229	Chkb	-0.2616	-0.155	-0.2866	0.5708	-0.2616	-0.155	-0.2866	0.5708	4
O55234	Psmb5	1.6843	1.0783	-2.3236	-2.0713	1.6843	1.0783	-2.3236	-2.0713	2
O55242	Sigmar1	-0.0061	-0.2322	0.4656	1.3734	-0.0061	-0.2322	0.4656	1.3734	4
O70133	Dhx9	-0.1574	-0.7161	0.5603	-0.1712	-0.1574	-0.7161	0.5603	-0.1712	3
O70152	Dpm1	0.0736	0.6628	0.3314	1.2417	0.0736	0.6628	0.3314	1.2417	1
O70161	Pip5k1c	-1.5478	-0.9935	0.1816	0.5011	-1.5478	-0.9935	0.1816	0.5011	3
O70165	Fcn1	0.5988	-0.1655	-2.0504	-0.0419	0.5988	-0.1655	-2.0504	-0.0419	2
O70194	Eif3d	0.392	-1.495	-1.2461	-1.8036	0.392	-1.495	-1.2461	-1.8036	2
O70200	Aif1	-0.4088	-1.3193	-1.3445	-0.6432	-0.4088	-1.3193	-1.3445	-0.6432	2
O70228	Atp9a	0.6484	1.0382	1.6681	2.8811	0.6484	1.0382	1.6681	2.8811	4
O70251	Eef1b	0.0953	-0.0643	-1.9157	-3.0498	0.0953	-0.0643	-1.9157	-3.0498	2
O70252	Hmox2	-1.1782	0.9335	0.8841	-0.8305	-1.1782	0.9335	0.8841	-0.8305	3
O70281	Tpst1	-1.5941	-0.6529	0.7864	0.8144	-1.5941	-0.6529	0.7864	0.8144	3
O70303	Cideb	0.1105	1.3326	1.3048	1.5364	0.1105	1.3326	1.3048	1.5364	4
O70309	Itgb5	-1.3153	0.2187	-0.3848	0.1544	-1.3153	0.2187	-0.3848	0.1544	3
O70310	Nmt1	-0.6573	0.0684	0.2754	-0.2269	-0.6573	0.0684	0.2754	-0.2269	3
O70318	Epb41l2	-1.2078	-0.4427	-1.3851	0.0366	-1.2078	-0.4427	-1.3851	0.0366	2
O70325	Gpx4	-0.4025	-0.4529	-0.1893	-0.423	-0.4025	-0.4529	-0.1893	-0.423	3
O70362	Gpld1	0.6778	0.2466	-1.7522	-1.1331	0.6778	0.2466	-1.7522	-1.1331	2
O70370	Ctss	-0.9844	-1.8134	2.0674	1.8042	-0.9844	-1.8134	2.0674	1.8042	3
O70378	Emc8	0.4706	0.2276	-0.8571	-0.3582	0.4706	0.2276	-0.8571	-0.3582	1
O70400	Pdlim1	2.9831	1.0493	0.1045	-0.5066	2.9831	1.0493	0.1045	-0.5066	1
O70404	Vamp8	2.6243	2.1243	-0.8846	0.9161	2.6243	2.1243	-0.8846	0.9161	1
O70435	Psma3	0.0733	-0.2689	-0.8521	-2.205	0.0733	-0.2689	-0.8521	-2.205	2
O70439	Stx7	0.2277	-0.409	-0.2931	-0.1212	0.2277	-0.409	-0.2931	-0.1212	2
O70451	Slc16a7	-0.9606	0.6462	-0.1829	0.0528	-0.9606	0.6462	-0.1829	0.0528	4
O70456	Sfn	0.8314	0.6346	1.0343	-0.0324	0.8314	0.6346	1.0343	-0.0324	1
O70475	Ugdh	-1.1333	-0.598	-0.6742	-1.6579	-1.1333	-0.598	-0.6742	-1.6579	2
O70480	Vamp4	0.9063	0.9339	1.0171	0.611	0.9063	0.9339	1.0171	0.611	1
O70492	Snx3	2.1392	0.7205	-3.3441	-1.7904	2.1392	0.7205	-3.3441	-1.7904	2
O70496	Clcn7	-0.1985	-0.6338	1.464	1.7604	-0.1985	-0.6338	1.464	1.7604	4
O70503	Hsd17b12	-0.3075	0.3181	1.2726	0.0269	-0.3075	0.3181	1.2726	0.0269	4
O70570	Pigr	1.5766	1.1983	-0.2543	0.1906	1.5766	1.1983	-0.2543	0.1906	1
O70571	Pdk4	1.7934	0.4564	3.3543	0.8122	1.7934	0.4564	3.3543	0.8122	4
O70572	Smpd2	0.5978	1.3108	1.2201	-0.3689	0.5978	1.3108	1.2201	-0.3689	1
O70577	Slc22a2	-0.2438	-1.4797	-0.2969	0.1801	-0.2438	-1.4797	-0.2969	0.1801	3
O70579	Slc25a17	-0.9448	-0.0845	2.0701	2.0358	-0.9448	-0.0845	2.0701	2.0358	4
O70585	Dtnb	-0.2274	-0.5126	-0.3662	0.1739	-0.2274	-0.5126	-0.3662	0.1739	2
O70589	Cask	-2.2923	-1.6099	-0.4912	-0.4334	-2.2923	-1.6099	-0.4912	-0.4334	2
O88338	Cdh16	-1.2355	-0.8422	-0.6285	0.0919	-1.2355	-0.8422	-0.6285	0.0919	3
O88342	Wdr1	1.1924	0.6529	1.1796	-0.1692	1.1924	0.6529	1.1796	-0.1692	1
O88343	Slc4a4	-0.9616	-0.1733	-1.5539	-1.1327	-0.9616	-0.1733	-1.5539	-1.1327	2
O88351	Ikbkb	0.375	-2.3059	0.6573	2.4118	0.375	-2.3059	0.6573	2.4118	4
O88384	Vti1b	-0.938	1.403	-0.5396	-0.7479	-0.938	1.403	-0.5396	-0.7479	2
O88428	Papss2	0.4467	-0.4406	-1.3587	-0.8686	0.4467	-0.4406	-1.3587	-0.8686	2
O88441	Mtx2	-0.0836	0.5986	-0.1619	-0.7269	-0.0836	0.5986	-0.1619	-0.7269	1
O88451	Rdh7	0.12	0.5573	0.0471	0.869	0.12	0.5573	0.0471	0.869	1
O88455	Dhcr7	-0.303	0.052	0.3997	0.7647	-0.303	0.052	0.3997	0.7647	4
O88456	Capns1	-0.4919	-0.6219	2.6754	0.2341	-0.4919	-0.6219	2.6754	0.2341	4
O88487	Dync1i2	0.2839	-0.2056	-1.2854	-1.6241	0.2839	-0.2056	-1.2854	-1.6241	2
O88520	Shoc2	-0.1837	-0.8023	0.6553	0.3965	-0.1837	-0.8023	0.6553	0.3965	3
O88531	Ppt1	0.5265	-0.8177	-0.1197	0.4304	0.5265	-0.8177	-0.1197	0.4304	2
O88533	Ddc	-0.5009	-0.1805	1.4376	1.4149	-0.5009	-0.1805	1.4376	1.4149	4
O88544	Cops4	-0.5978	-0.5138	0.0145	-0.1661	-0.5978	-0.5138	0.0145	-0.1661	3
O88569	Hnrnpa2b1	-0.3845	1.0432	-1.0834	-3.0619	-0.3845	1.0432	-1.0834	-3.0619	2
O88587	Comt	0.6116	0.2853	0.5568	0.9879	0.6116	0.2853	0.5568	0.9879	1
O88597	Becn1	1.3209	-1.1273	-0.1879	-0.6763	1.3209	-1.1273	-0.1879	-0.6763	2
O88623	Usp2	-1.0085	0.252	-0.5187	-1.9514	-1.0085	0.252	-0.5187	-1.9514	2
O88630	Gosr1	0.8203	-0.7735	-0.0789	-1.3032	0.8203	-0.7735	-0.0789	-1.3032	2
O88653	Lamtor3	1.3331	3.1589	-1.1469	-1.3611	1.3331	3.1589	-1.1469	-1.3611	1
O88685	Psmc3	-0.0606	-0.6322	-1.1465	-7.17	-0.0606	-0.6322	-1.1465	-7.17	2
O88696	Clpp	-0.2002	-0.1564	-0.2118	-0.8844	-0.2002	-0.1564	-0.2118	-0.8844	2
O88697	Stk16	-1.3461	-0.8182	1.2635	0.271	-1.3461	-0.8182	1.2635	0.271	3
O88736	Hsd17b7	-0.4636	-0.1951	2.1094	0.6941	-0.4636	-0.1951	2.1094	0.6941	4
O88746	Tom1	1.7512	0.6478	0.1507	-0.0546	1.7512	0.6478	0.1507	-0.0546	1
O88783	F5	1.7629	1.6781	0.8696	1.2333	1.7629	1.6781	0.8696	1.2333	1
O88792	F11r	0.1875	0.6531	0.5476	-0.4085	0.1875	0.6531	0.5476	-0.4085	1
O88829	St3gal5	1.3	-0.5447	1.458	2.607	1.3	-0.5447	1.458	2.607	4
O88833	Cyp4a10	0.7465	2.1998	-0.0509	1.3672	0.7465	2.1998	-0.0509	1.3672	1
O88844	Idh1	-0.1797	0.0257	-2.2393	-2.0202	-0.1797	0.0257	-2.2393	-2.0202	2
O88851	Rbbp9	0.9671	-0.3978	-0.393	-1.2328	0.9671	-0.3978	-0.393	-1.2328	2
O88856	Tpst2	-0.0705	-1.4184	-0.6111	0.0165	-0.0705	-1.4184	-0.6111	0.0165	3
O88876	Dhrs3	-0.5629	1.703	-1.2053	-1.0693	-0.5629	1.703	-1.2053	-1.0693	2
O88908	Soat2	0.2856	0.3866	0.1095	1.1483	0.2856	0.3866	0.1095	1.1483	1
O88947	F10	0.6166	-0.439	-0.9539	-0.7204	0.6166	-0.439	-0.9539	-0.7204	2
O88958	Gnpda1	-0.7107	-1.0031	0.095	-3.1005	-0.7107	-1.0031	0.095	-3.1005	2
O88962	Cyp8b1	-0.2018	-1.0084	-0.364	0.6175	-0.2018	-1.0084	-0.364	0.6175	3
O88967	Yme1l1	-0.1865	-0.4954	0.4021	-0.5724	-0.1865	-0.4954	0.4021	-0.5724	3
O88968	Tcn2	2.6454	2.1707	-0.7307	2.0181	2.6454	2.1707	-0.7307	2.0181	1
O88983	Stx8	0.7706	0.9607	1.381	1.2301	0.7706	0.9607	1.381	1.2301	1
O88986	Gcat	0.4487	-0.367	-0.2059	-0.8963	0.4487	-0.367	-0.2059	-0.8963	2
O89001	Cpd	2.5962	0.5378	-0.8404	0.6697	2.5962	0.5378	-0.8404	0.6697	1
O89013	Leprot	-1.7447	-0.8011	1.2902	3.238	-1.7447	-0.8011	1.2902	3.238	4
O89016	Abcd4	-1.592	-1.3113	0.8337	0.7103	-1.592	-1.3113	0.8337	0.7103	3
O89017	Lgmn	-1.1128	-1.0178	1.2454	1.6241	-1.1128	-1.0178	1.2454	1.6241	4
O89020	Afm	-0.6184	-0.3687	-0.2761	-0.3039	-0.6184	-0.3687	-0.2761	-0.3039	3
O89023	Tpp1	0.2599	-0.2191	1.748	3.2469	0.2599	-0.2191	1.748	3.2469	4
O89051	Itm2b	5.2034	3.0509	1.2043	2.106	5.2034	3.0509	1.2043	2.106	1
O89053	Coro1a	-0.6124	-1.0198	1.3497	0.7313	-0.6124	-1.0198	1.3497	0.7313	3
O89079	Cope	0.2419	0.1651	-0.1364	0.1799	0.2419	0.1651	-0.1364	0.1799	1
O89112	Lancl1	-0.734	0.6814	1.7293	1.9408	-0.734	0.6814	1.7293	1.9408	4
P00186	Cyp1a2	0.1768	0.332	0.2599	0.1502	0.1768	0.332	0.2599	0.1502	1
P00329	Adh1	0.7955	0.1589	-0.7007	-2.5989	0.7955	0.1589	-0.7007	-2.5989	2
P00375	Dhfr	0.8037	0.4734	-2.3693	-3.72	0.8037	0.4734	-2.3693	-3.72	2
P00397	Mtco1	-1.3643	0.1759	0.2452	0.773	-1.3643	0.1759	0.2452	0.773	3
P00405	Mtco2	-1.0451	-0.4986	0.8027	0.6189	-1.0451	-0.4986	0.8027	0.6189	3
P00493	Hprt1	-0.3671	0.284	1.0112	0.141	-0.3671	0.284	1.0112	0.141	3
P00687	Amy1	1.3333	-0.7617	-0.0007	0.2418	1.3333	-0.7617	-0.0007	0.2418	1
P00688	Amy2	-1.3364	-1.2691	-0.8639	-1.1564	-1.3364	-1.2691	-0.8639	-1.1564	2
P00920	Ca2	-1.3743	0.3757	-2.0982	-1.5453	-1.3743	0.3757	-2.0982	-1.5453	2
P01027	C3	0.241	1.2763	0.6304	1.7905	0.241	1.2763	0.6304	1.7905	1
P01029	C4b	1.7739	1.2699	0.8948	1.9042	1.7739	1.2699	0.8948	1.9042	1
P01592	Jchain	0.6437	0.8788	-1.0032	-0.7384	0.6437	0.8788	-1.0032	-0.7384	1
P01633	Igk-V19-17	-0.2213	-0.1071	0.7849	-0.7894	-0.2213	-0.1071	0.7849	-0.7894	1
P01639	Gm5571	-1.9811	-0.3226	0.6726	-3.7048	-1.9811	-0.3226	0.6726	-3.7048	2
P01645	NoGeneName	0.1472	-0.6686	-0.4051	0.1853	0.1472	-0.6686	-0.4051	0.1853	2
P01786	NoGeneName	-1.5051	-1.7014	0.4547	0.7027	-1.5051	-1.7014	0.4547	0.7027	3
P01837	Igkc	-0.205	-0.3707	-0.0593	-0.4699	-0.205	-0.3707	-0.0593	-0.4699	3
P01845	Iglc3	-0.4602	0.3026	-0.6644	-1.5745	-0.4602	0.3026	-0.6644	-1.5745	2
P01867	Igh-3	-1.1092	-0.5693	-0.666	-0.7767	-1.1092	-0.5693	-0.666	-0.7767	2
P01869	Ighg1	0.0799	-1.5254	-3.2885	-1.6298	0.0799	-1.5254	-3.2885	-1.6298	2
P01872	Ighm	-0.9348	-0.926	-0.1039	-0.7118	-0.9348	-0.926	-0.1039	-0.7118	3
P01887	B2m	0.3732	-1.9365	-0.9015	-0.2472	0.3732	-1.9365	-0.9015	-0.2472	3
P01897	H2-L	-0.7139	-1.2601	1.2051	0.4375	-0.7139	-1.2601	1.2051	0.4375	3
P01898	H2-Q10	0.7823	0.4876	0.8158	1.3021	0.7823	0.4876	0.8158	1.3021	1
P01901	H2-K1	-0.1001	-1.0006	2.0215	0.4531	-0.1001	-1.0006	2.0215	0.4531	4
P01921	H2-Ab1	-0.0707	-0.6388	0.614	0.3169	-0.0707	-0.6388	0.614	0.3169	3
P01942	Hba	-0.5414	0.1551	-1.2163	-0.6587	-0.5414	0.1551	-1.2163	-0.6587	2
P02463	Col4a1	-0.1199	-0.4677	0.0851	-0.3449	-0.1199	-0.4677	0.0851	-0.3449	3
P02535	Krt10	-0.2923	-0.2728	0.4538	-0.3646	-0.2923	-0.2728	0.4538	-0.3646	3
P02762	Mup6	0.9789	-0.1367	1.9824	0.6102	0.9789	-0.1367	1.9824	0.6102	4
P03888	Mtnd1	-0.2877	-0.0914	-0.1296	0.5273	-0.2877	-0.0914	-0.1296	0.5273	4
P03893	Mtnd2	-0.6456	0.8225	-0.1989	1.1215	-0.6456	0.8225	-0.1989	1.1215	1
P03911	Mtnd4	-1.8307	-0.1743	-0.2673	0.4917	-1.8307	-0.1743	-0.2673	0.4917	3
P03921	Mtnd5	-0.672	1.0917	1.1821	0.5091	-0.672	1.0917	1.1821	0.5091	3
P03930	Mtatp8	0.9716	-0.8607	-0.1536	-0.2396	0.9716	-0.8607	-0.1536	-0.2396	2
P03958	Ada	0.6407	1.1344	-0.4303	1.4632	0.6407	1.1344	-0.4303	1.4632	1
P04104	Krt1	-0.4641	-0.4096	0.6652	-0.3754	-0.4641	-0.4096	0.6652	-0.3754	3
P04117	Fabp4	-0.7548	-0.2827	0.2813	-1.0128	-0.7548	-0.2827	0.2813	-1.0128	3
P04187	Gzmb	-0.3226	-1.0526	1.2478	0.6099	-0.3226	-1.0526	1.2478	0.6099	3
P04230	H2-Eb1	-0.6151	-2.3488	1.4496	0.3114	-0.6151	-2.3488	1.4496	0.3114	3
P04441	Cd74	-1.2958	-1.6108	1.0928	0.8062	-1.2958	-1.6108	1.0928	0.8062	3
P04627	Araf	-0.3057	-2.3908	-0.1198	-0.1057	-0.3057	-2.3908	-0.1198	-0.1057	3
P04919	Slc4a1	-0.3092	0.2509	-2.1999	0.0549	-0.3092	0.2509	-2.1999	0.0549	2
P04938	Mup11	1.0861	-0.134	2.119	0.654	1.0861	-0.134	2.119	0.654	4
P04939	Mup3	2.0416	1.3065	0.5705	0.8738	2.0416	1.3065	0.5705	0.8738	1
P05064	Aldoa	0.0317	-0.6172	-1.1708	-1.5451	0.0317	-0.6172	-1.1708	-1.5451	2
P05201	Got1	1.6822	-0.101	-0.9445	-2.4942	1.6822	-0.101	-0.9445	-2.4942	2
P05202	Got2	0.238	0.1679	-1.1989	-1.2614	0.238	0.1679	-1.1989	-1.2614	2
P05208	Cela2a	0.4958	-0.4757	-0.1599	-0.1739	0.4958	-0.4757	-0.1599	-0.1739	2
P05784	Krt18	-1.2514	-0.6774	1.1147	0.5454	-1.2514	-0.6774	1.1147	0.5454	3
P05977	Myl1	-0.757	-1.1187	0.3275	-0.3201	-0.757	-1.1187	0.3275	-0.3201	3
P06151	Ldha	0.0841	0.3567	-0.1986	-0.9198	0.0841	0.3567	-0.1986	-0.9198	1
P06330	NoGeneName	0.1359	-0.1346	-0.2265	-0.2773	0.1359	-0.1346	-0.2265	-0.2773	2
P06339	H2-T23	-0.1917	-1.6	2.5169	0.6513	-0.1917	-1.6	2.5169	0.6513	3
P06344	NoGeneName	-0.9628	-0.6467	1.1062	0.4751	-0.9628	-0.6467	1.1062	0.4751	3
P06684	C5	0.7221	1.5564	0.1559	1.2009	0.7221	1.5564	0.1559	1.2009	1
P06728	Apoa4	2.6195	1.4377	0.1891	-1.0066	2.6195	1.4377	0.1891	-1.0066	1
P06745	Gpi	0.3858	0.714	0.3108	-1.8839	0.3858	0.714	0.3108	-1.8839	2
P06797	Ctsl	2.0109	2.2213	3.8411	2.6037	2.0109	2.2213	3.8411	2.6037	1
P06800	Ptprc	-1.0853	-1.4483	0.7786	1.2189	-1.0853	-1.4483	0.7786	1.2189	3
P06801	Me1	0.3085	0.4712	0.2585	-1.6349	0.3085	0.4712	0.2585	-1.6349	2
P06802	Enpp1	-0.27	-0.6725	-0.4827	-1.1467	-0.27	-0.6725	-0.4827	-1.1467	3
P06909	Cfh	1.7258	0.5901	-0.028	0.5496	1.7258	0.5901	-0.028	0.5496	1
P07146	Prss2	2.0582	-0.6218	-0.4192	-0.1404	2.0582	-0.6218	-0.4192	-0.1404	1
P07214	Sparc	3.0327	1.1701	0.0858	-1.1836	3.0327	1.1701	0.0858	-1.1836	1
P07309	Ttr	1.1576	0.3423	0.0481	0.6464	1.1576	0.3423	0.0481	0.6464	1
P07356	Anxa2	-1.4289	-0.8912	0.6295	-0.266	-1.4289	-0.8912	0.6295	-0.266	3
P07724	Alb	-0.1879	-0.1313	-1.3677	-0.8345	-0.1879	-0.1313	-1.3677	-0.8345	2
P07759	Serpina3k	1.5873	1.7316	0.3799	0.9621	1.5873	1.7316	0.3799	0.9621	1
P07901	Hsp90aa1	-0.3924	0.2881	0.6497	-1.2023	-0.3924	0.2881	0.6497	-1.2023	1
P08003	Pdia4	0.1731	0.4003	0.0962	0.8367	0.1731	0.4003	0.0962	0.8367	1
P08032	Spta1	-0.2125	0.2947	-2.6034	-0.9626	-0.2125	0.2947	-2.6034	-0.9626	2
P08071	Ltf	-2.1097	0.1721	-0.6352	-0.8072	-2.1097	0.1721	-0.6352	-0.8072	2
P08101	Fcgr2	-0.0839	-0.3889	-0.7978	-2.1343	-0.0839	-0.3889	-0.7978	-2.1343	2
P08103	Hck	-2.5113	-1.9107	0.3695	1.776	-2.5113	-1.9107	0.3695	1.776	3
P08113	Hsp90b1	0.2048	0.4921	0.5182	1.1593	0.2048	0.4921	0.5182	1.1593	1
P08122	Col4a2	-1.0634	-0.6009	0.2565	-0.4461	-1.0634	-0.6009	0.2565	-0.4461	3
P08226	Apoe	4.8014	1.7518	0.3322	0.884	4.8014	1.7518	0.3322	0.884	1
P08228	Sod1	-0.2158	-0.5146	1.2507	0.344	-0.2158	-0.5146	1.2507	0.344	3
P08249	Mdh2	0.4011	-0.0352	-1.5437	-1.3374	0.4011	-0.0352	-1.5437	-1.3374	2
P08607	C4bpa	-1.1973	-0.6583	1.2027	0.5704	-1.1973	-0.6583	1.2027	0.5704	3
P08752	Gnai2	-1.2265	-1.4156	0.8302	1.1158	-1.2265	-1.4156	0.8302	1.1158	3
P08905	Lyz2	-1.8401	-2.1202	-0.359	1.0469	-1.8401	-2.1202	-0.359	1.0469	3
P09055	Itgb1	-1.6581	-1.4381	-0.046	-1.2273	-1.6581	-1.4381	-0.046	-1.2273	3
P09103	P4hb	0.192	0.3952	0.4839	1.1174	0.192	0.3952	0.4839	1.1174	1
P09242	Alpl	-2.2948	-0.0905	1.0106	-0.578	-2.2948	-0.0905	1.0106	-0.578	3
P09405	Ncl	-0.8527	-0.2606	0.1292	-0.2639	-0.8527	-0.2606	0.1292	-0.2639	3
P09411	Pgk1	0.8496	0.4676	-2.335	-3.4622	0.8496	0.4676	-2.335	-3.4622	2
P09528	Fth1	0.2785	0.0497	1.144	-0.4783	0.2785	0.0497	1.144	-0.4783	1
P09581	Csf1r	0.5157	-0.4303	0.4344	2.6934	0.5157	-0.4303	0.4344	2.6934	4
P09671	Sod2	0.1023	-0.6427	-0.5908	-0.5086	0.1023	-0.6427	-0.5908	-0.5086	2
P09803	Cdh1	-1.6366	0.0136	0.578	0.9447	-1.6366	0.0136	0.578	0.9447	3
P09925	Surf1	-0.3069	0.1207	0.2408	0.2363	-0.3069	0.1207	0.2408	0.2363	3
P0C0A3	Chmp6	-1.5496	-0.3528	-1.4142	-1.1426	-1.5496	-0.3528	-1.4142	-1.1426	2
P0DP27	Calm2	2.512	0.9099	-0.1498	-1.6497	2.512	0.9099	-0.1498	-1.6497	1
P0DP28	Calm3	2.3657	0.9001	-0.0764	-1.4389	2.3657	0.9001	-0.0764	-1.4389	1
P10126	Eef1a1	0.2008	0.2779	-1.0503	-0.7082	0.2008	0.2779	-1.0503	-0.7082	2
P10493	Nid1	0.0561	1.0866	0.6787	-0.3347	0.0561	1.0866	0.6787	-0.3347	1
P10518	Alad	0.3931	-0.3076	-0.3871	-1.8796	0.3931	-0.3076	-0.3871	-1.8796	2
P10605	Ctsb	-0.6058	-1.1202	2.8948	2.8589	-0.6058	-1.1202	2.8948	2.8589	4
P10639	Txn	0.2171	-1.1901	1.7075	1.435	0.2171	-1.1901	1.7075	1.435	4
P10649	Gstm1	0.5083	-0.4952	0.1219	-1.5635	0.5083	-0.4952	0.1219	-1.5635	2
P10833	Rras	-0.299	-0.4703	-0.8754	-0.9828	-0.299	-0.4703	-0.8754	-0.9828	2
P10852	Slc3a2	-1.0126	-0.8968	-0.5713	0.8479	-1.0126	-0.8968	-0.5713	0.8479	3
P10854	Hist1h2bm	-0.5476	-0.8031	-0.1194	-1.0189	-0.5476	-0.8031	-0.1194	-1.0189	3
P10922	H1f0	-0.9985	1.3355	0.5517	0.019	-0.9985	1.3355	0.5517	0.019	4
P11032	Gzma	-0.3927	-0.22	0.5875	1.117	-0.3927	-0.22	0.5875	1.117	4
P11087	Col1a1	1.3004	0.982	0.5935	0.0548	1.3004	0.982	0.5935	0.0548	1
P11152	Lpl	1.1831	0.8944	-1.7741	0.1485	1.1831	0.8944	-1.7741	0.1485	1
P11247	Mpo	-2.5038	-0.7579	0.0545	1.4368	-2.5038	-0.7579	0.0545	1.4368	3
P11276	Fn1	1.8953	0.8287	0.823	0.6677	1.8953	0.8287	0.823	0.6677	1
P11352	Gpx1	0.8809	0.0957	-0.051	0.1021	0.8809	0.0957	-0.051	0.1021	1
P11438	Lamp1	-0.1358	-0.258	2.4471	2.3712	-0.1358	-0.258	2.4471	2.3712	4
P11499	Hsp90ab1	-0.079	0.2545	0.7045	-0.6806	-0.079	0.2545	0.7045	-0.6806	1
P11531	Dmd	-0.0138	-0.8506	0.9072	-0.7375	-0.0138	-0.8506	0.9072	-0.7375	3
P11589	Mup2	0.9867	0.5511	1.1881	0.6573	0.9867	0.5511	1.1881	0.6573	1
P11609	Cd1d1	1.4251	1.5013	0.3687	0.3881	1.4251	1.5013	0.3687	0.3881	1
P11672	Lcn2	-4.1432	0.3153	0.0465	1.3805	-4.1432	0.3153	0.0465	1.3805	3
P11679	Krt8	-1.1974	-0.7298	0.8565	0.4038	-1.1974	-0.7298	0.8565	0.4038	3
P11688	Itga5	-1.8714	-1.465	-0.8541	-2.5224	-1.8714	-1.465	-0.8541	-2.5224	2
P11714	Cyp2d9	-1.1635	-0.9749	1.5376	0.9262	-1.1635	-0.9749	1.5376	0.9262	3
P11725	Otc	-0.0366	-0.3576	-0.1235	-0.8276	-0.0366	-0.3576	-0.1235	-0.8276	2
P11835	Itgb2	-0.864	-1.4584	0.5806	1.1227	-0.864	-1.4584	0.5806	1.1227	3
P11859	Agt	1.8949	1.2744	0.5101	0.5964	1.8949	1.2744	0.5101	0.5964	1
P11881	Itpr1	-0.8099	0.1538	-2.031	1.1789	-0.8099	0.1538	-2.031	1.1789	4
P11928	Oas1a	-1.6387	-2.0128	1.6493	1.2266	-1.6387	-2.0128	1.6493	1.2266	3
P11930	Nudt19	-0.7978	-0.2444	0.8784	1.0165	-0.7978	-0.2444	0.8784	1.0165	4
P11983	Tcp1	1.6008	1.5787	0.7278	-0.6048	1.6008	1.5787	0.7278	-0.6048	1
P12023	App	0.6794	0.4536	0.0359	-0.2351	0.6794	0.4536	0.0359	-0.2351	1
P12246	Apcs	-0.9742	1.8972	1.4466	0.2547	-0.9742	1.8972	1.4466	0.2547	3
P12265	Gusb	-0.6338	-0.7308	2.3903	3.0061	-0.6338	-0.7308	2.3903	3.0061	4
P12367	Prkar2a	0.3064	-0.0781	-0.1313	0.6629	0.3064	-0.0781	-0.1313	0.6629	1
P12382	Pfkl	0.3116	-0.8495	-0.1456	-0.9322	0.3116	-0.8495	-0.1456	-0.9322	2
P12710	Fabp1	1.1673	1.3613	-2.0605	-2.0892	1.1673	1.3613	-2.0605	-2.0892	2
P12787	Cox5a	0.6886	-0.1359	-1.502	-1.206	0.6886	-0.1359	-1.502	-1.206	2
P12790	Cyp2b9	0.3666	0.6743	-0.0689	0.3927	0.3666	0.6743	-0.0689	0.3927	1
P12791	Cyp2b10	0.1686	0.344	1.1565	0.7073	0.1686	0.344	1.1565	0.7073	1
P12815	Pdcd6	1.5565	0.7374	1.2309	1.1902	1.5565	0.7374	1.2309	1.1902	1
P12970	Rpl7a	0.4997	0.585	-0.151	0.3133	0.4997	0.585	-0.151	0.3133	1
P13020	Gsn	1.2031	-0.0116	-2.4073	-1.5603	1.2031	-0.0116	-2.4073	-1.5603	2
P13516	Scd1	1.278	0.2126	0.5563	-0.869	1.278	0.2126	0.5563	-0.869	1
P13542	Myh8	-0.2052	-1.2857	0.9078	0.8519	-0.2052	-1.2857	0.9078	0.8519	4
P13597	Icam1	-1.3422	-0.9481	1.1893	0.5646	-1.3422	-0.9481	1.1893	0.5646	3
P13634	Ca1	-1.6018	1.1634	-1.1027	0.1738	-1.6018	1.1634	-1.1027	0.1738	1
P13707	Gpd1	-0.0472	-0.4949	1.4517	1.019	-0.0472	-0.4949	1.4517	1.019	4
P14094	Atp1b1	-1.3663	-1.4011	-1.2978	-1.8544	-1.3663	-1.4011	-1.2978	-1.8544	2
P14106	C1qb	-0.1017	-0.8191	-0.1447	0.0684	-0.1017	-0.8191	-0.1447	0.0684	3
P14115	Rpl27a	0.557	0.5751	-0.4337	-0.0672	0.557	0.5751	-0.4337	-0.0672	1
P14131	Rps16	-0.1177	0.0988	-1.8887	-1.1199	-0.1177	0.0988	-1.8887	-1.1199	2
P14148	Rpl7	0.2376	0.5979	0.1516	0.7748	0.2376	0.5979	0.1516	0.7748	1
P14152	Mdh1	-0.017	-0.2689	-1.1182	-1.1511	-0.017	-0.2689	-1.1182	-1.1511	2
P14206	Rpsa	0.2109	-0.0727	-1.4026	-1.323	0.2109	-0.0727	-1.4026	-1.323	2
P14211	Calr	-0.0539	0.4481	-0.2443	0.6135	-0.0539	0.4481	-0.2443	0.6135	1
P14234	Fgr	0.0335	0.8304	0.0673	1.0237	0.0335	0.8304	0.0673	1.0237	1
P14246	Slc2a2	-0.6733	-0.6814	-1.0497	-2.367	-0.6733	-0.6814	-1.0497	-2.367	2
P14429	H2-Q7	-0.768	-1.0733	1.064	0.4975	-0.768	-1.0733	1.064	0.4975	3
P14576	Srp54	0.6442	1.7589	0.5268	-0.4209	0.6442	1.7589	0.5268	-0.4209	1
P14602	Hspb1	0.009	-0.7771	0.8076	1.0107	0.009	-0.7771	0.8076	1.0107	4
P14685	Psmd3	0.0009	-0.1536	-0.334	-0.2467	0.0009	-0.1536	-0.334	-0.2467	2
P14733	Lmnb1	-1.3569	-1.3163	0.3799	0.0525	-1.3569	-1.3163	0.3799	0.0525	3
P14824	Anxa6	-0.5656	-0.3343	0.7421	0.2018	-0.5656	-0.3343	0.7421	0.2018	3
P14847	Crp	0.9937	1.348	1.7173	3.2544	0.9937	1.348	1.7173	3.2544	4
P14869	Rplp0	0.4027	0.2213	-0.2643	0.6157	0.4027	0.2213	-0.2643	0.6157	1
P14901	Hmox1	0.5699	0.0554	1.3287	-0.3121	0.5699	0.0554	1.3287	-0.3121	1
P15105	Glul	0.249	-0.106	-0.0057	-0.1587	0.249	-0.106	-0.0057	-0.1587	1
P15116	Cdh2	-0.1224	0.2554	-1.0496	-1.0909	-0.1224	0.2554	-1.0496	-1.0909	2
P15208	Insr	-0.407	-0.7125	-0.7047	-0.4307	-0.407	-0.7125	-0.7047	-0.4307	2
P15379	Cd44	-0.7043	-0.8117	0.5629	1.5273	-0.7043	-0.8117	0.5629	1.5273	4
P15392	Cyp2a4	0.3992	0.4149	0.5669	0.492	0.3992	0.4149	0.5669	0.492	1
P15508	Sptb	-0.227	0.306	-2.2293	-0.5603	-0.227	0.306	-2.2293	-0.5603	2
P15535	B4galt1	-0.71	0.3533	0.2608	0.6891	-0.71	0.3533	0.2608	0.6891	4
P15626	Gstm2	0.3306	0.2669	1.0908	-2.742	0.3306	0.2669	1.0908	-2.742	2
P16015	Ca3	-0.0682	0.6024	-1.3643	-1.9238	-0.0682	0.6024	-1.3643	-1.9238	2
P16045	Lgals1	-0.5931	-0.7982	-0.3097	-1.6565	-0.5931	-0.7982	-0.3097	-1.6565	2
P16056	Met	0.1246	0.6858	0.4053	-0.0095	0.1246	0.6858	0.4053	-0.0095	1
P16110	Lgals3	-3.957	-2.3324	-0.3157	-0.8589	-3.957	-2.3324	-0.3157	-0.8589	2
P16125	Ldhb	0.0084	-0.8871	-0.2889	-1.0586	0.0084	-0.8871	-0.2889	-1.0586	2
P16294	F9	0.99	0.6958	-1.5552	-0.6385	0.99	0.6958	-1.5552	-0.6385	1
P16301	Lcat	1.8324	0.2332	-2.0491	1.0105	1.8324	0.2332	-2.0491	1.0105	1
P16330	Cnp	2.4223	0.1916	0.221	-0.3636	2.4223	0.1916	0.221	-0.3636	1
P16331	Pah	0.8821	0.7957	0.1151	-3.3491	0.8821	0.7957	0.1151	-3.3491	2
P16332	Mmut	-0.1944	-0.538	0.0942	-0.1343	-0.1944	-0.538	0.0942	-0.1343	3
P16406	Enpep	-0.5714	0.1295	1.9064	1.8334	-0.5714	0.1295	1.9064	1.8334	4
P16460	Ass1	0.5579	0.9523	-2.0176	-1.8772	0.5579	0.9523	-2.0176	-1.8772	2
P16546	Sptan1	-1.1031	-1.5302	-0.9091	-0.9114	-1.1031	-1.5302	-0.9091	-0.9114	2
P16675	Ctsa	-0.3247	-0.7992	1.6014	2.4225	-0.3247	-0.7992	1.6014	2.4225	4
P16858	Gapdh	0.27	0.6857	-2.6377	-2.6551	0.27	0.6857	-2.6377	-2.6551	2
P16882	Ghr	2.5224	1.412	-8.5899	-0.7837	2.5224	1.412	-8.5899	-0.7837	2
P17047	Lamp2	0.3654	-0.0231	3.1297	3.8006	0.3654	-0.0231	3.1297	3.8006	4
P17182	Eno1	0.9832	0.4041	-2.343	-3.4815	0.9832	0.4041	-2.343	-3.4815	2
P17225	Ptbp1	0.4009	-1.1453	2.2273	1.1864	0.4009	-1.1453	2.2273	1.1864	4
P17426	Ap2a1	-0.4402	-0.3742	-1.9338	-0.0929	-0.4402	-0.3742	-1.9338	-0.0929	2
P17427	Ap2a2	-0.9482	-0.5333	-0.757	-0.2526	-0.9482	-0.5333	-0.757	-0.2526	2
P17439	Gba	-1.0079	-0.94	3.4312	2.9374	-1.0079	-0.94	3.4312	2.9374	4
P17563	Selenbp1	1.1103	0.8199	-0.4067	-1.078	1.1103	0.8199	-0.4067	-1.078	1
P17710	Hk1	-1.3922	-1.5432	-0.4108	0.2092	-1.3922	-1.5432	-0.4108	0.2092	3
P17717	Ugt2b17	-0.1065	0.3634	0.3359	0.8852	-0.1065	0.3634	0.3359	0.8852	1
P17742	Ppia	1.5943	0.6052	-1.0463	-1.1491	1.5943	0.6052	-1.0463	-1.1491	2
P17751	Tpi1	1.0832	0.7128	-0.9361	-2.002	1.0832	0.7128	-0.9361	-2.002	2
P17809	Slc2a1	-0.0645	1.2928	0.0673	-0.485	-0.0645	1.2928	0.0673	-0.485	1
P18052	Ptpra	-0.5816	0.4764	-0.623	1.3187	-0.5816	0.4764	-0.623	1.3187	4
P18242	Ctsd	-0.4589	-0.8481	2.6881	3.7062	-0.4589	-0.8481	2.6881	3.7062	4
P18527	NoGeneName	0.3757	0.8249	-0.0112	0.2711	0.3757	0.8249	-0.0112	0.2711	1
P18572	Bsg	-1.3525	-1.0064	-1.3126	-1.2307	-1.3525	-1.0064	-1.3126	-1.2307	2
P18581	Slc7a2	1.0942	-0.0916	1.313	-1.3648	1.0942	-0.0916	1.313	-1.3648	1
P18760	Cfl1	1.9917	0.3142	1.394	0.9502	1.9917	0.3142	1.394	0.9502	1
P18828	Sdc1	-0.4288	-1.1266	0.2327	-0.0823	-0.4288	-1.1266	0.2327	-0.0823	3
P18894	Dao	-0.9316	1.6917	-0.9902	1.0308	-0.9316	1.6917	-0.9902	1.0308	1
P19001	Krt19	-0.6842	-0.5059	-2.6784	-0.1056	-0.6842	-0.5059	-2.6784	-0.1056	2
P19096	Fasn	0.6895	0.2549	0.031	-1.7759	0.6895	0.2549	0.031	-1.7759	2
P19157	Gstp1	-0.2215	0.2423	0.3143	-2.7334	-0.2215	0.2423	0.3143	-2.7334	2
P19221	F2	3.827	2.1087	-0.6609	-0.4453	3.827	2.1087	-0.6609	-0.4453	1
P19324	Serpinh1	-0.7897	-0.6473	-0.705	-0.7998	-0.7897	-0.6473	-0.705	-0.7998	2
P19536	Cox5b	0.2994	0.5216	-0.8349	-1.0635	0.2994	0.5216	-0.8349	-1.0635	2
P19639	Gstm3	-0.3898	-0.8406	3.3069	-0.7996	-0.3898	-0.8406	3.3069	-0.7996	4
P19783	Cox4i1	-1.3105	-0.7797	0.5808	0.1909	-1.3105	-0.7797	0.5808	0.1909	3
P20029	Hspa5	0.4524	0.4544	0.4389	0.788	0.4524	0.4544	0.4389	0.788	1
P20040	NoGeneName	-0.7191	-2.5249	1.4433	0.3748	-0.7191	-2.5249	1.4433	0.3748	3
P20060	Hexb	-0.9656	-1.1933	1.6858	1.9722	-0.9656	-1.1933	1.6858	1.9722	4
P20108	Prdx3	-0.4703	-1.5615	1.0032	0.7979	-0.4703	-1.5615	1.0032	0.7979	3
P20152	Vim	-0.3049	0.4749	1.7717	0.8366	-0.3049	0.4749	1.7717	0.8366	4
P20491	Fcer1g	-0.7456	-0.1446	-0.4305	-0.0934	-0.7456	-0.1446	-0.4305	-0.0934	3
P20852	Cyp2a5	-0.7195	-0.3718	0.7516	0.7006	-0.7195	-0.3718	0.7516	0.7006	3
P20918	Plg	0.9838	0.8903	-1.5654	-0.0154	0.9838	0.8903	-1.5654	-0.0154	1
P21107	Tpm3	-0.5447	-0.98	1.4936	1.5858	-0.5447	-0.98	1.4936	1.5858	4
P21278	Gna11	-0.9609	-0.6613	1.1389	-1.3806	-0.9609	-0.6613	1.1389	-1.3806	3
P21279	Gnaq	-0.3712	-1.26	1.0452	-0.3728	-0.3712	-1.26	1.0452	-0.3728	3
P21440	Abcb4	-1.5876	-0.4002	-0.6138	-2.0982	-1.5876	-0.4002	-0.6138	-2.0982	2
P21550	Eno3	0.6127	-0.8857	-0.5026	-2.6803	0.6127	-0.8857	-0.5026	-2.6803	2
P21614	Gc	1.344	2.0612	-0.8446	0.3728	1.344	2.0612	-0.8446	0.3728	1
P21619	Lmnb2	-0.6554	1.4827	-2.0397	0.932	-0.6554	1.4827	-2.0397	0.932	1
P21956	Mfge8	-0.7457	1.2098	-0.862	-0.0959	-0.7457	1.2098	-0.862	-0.0959	1
P21958	Tap1	-0.8416	-0.9926	0.8065	0.6843	-0.8416	-0.9926	0.8065	0.6843	3
P21981	Tgm2	-1.0575	-0.5518	0.2258	-0.0379	-1.0575	-0.5518	0.2258	-0.0379	3
P22272	Il6ra	3.4374	1.6506	-0.2909	1.6988	3.4374	1.6506	-0.2909	1.6988	1
P22315	Fech	-0.0858	-0.3545	-0.6896	-0.5544	-0.0858	-0.3545	-0.6896	-0.5544	2
P22437	Ptgs1	-0.6217	-1.0022	1.4308	1.6771	-0.6217	-1.0022	1.4308	1.6771	4
P22599	Serpina1b	1.2989	0.9412	0.1252	0.6092	1.2989	0.9412	0.1252	0.6092	1
P22892	Ap1g1	0.0752	-0.4626	0.3079	0.6804	0.0752	-0.4626	0.3079	0.6804	4
P23116	Eif3a	1.18	0.1092	1.6853	-1.5548	1.18	0.1092	1.6853	-1.5548	1
P23249	Mov10	-1.6477	-1.5773	-0.0494	0.8772	-1.6477	-1.5773	-0.0494	0.8772	3
P23492	Pnp	-1.2388	-0.8866	0.2693	-1.2318	-1.2388	-0.8866	0.2693	-1.2318	3
P23506	Pcmt1	0.1893	-0.0559	-0.6601	2.8686	0.1893	-0.0559	-0.6601	2.8686	4
P23589	Ca5a	0.2527	-0.2896	-0.3853	-0.8141	0.2527	-0.2896	-0.3853	-0.8141	2
P23591	Tsta3	0.3882	0.663	-0.6702	-3.107	0.3882	0.663	-0.6702	-3.107	2
P23780	Glb1	-0.9582	-0.906	1.7022	3.2555	-0.9582	-0.906	1.7022	3.2555	4
P23953	Ces1c	0.6515	0.4208	-0.2573	0.3594	0.6515	0.4208	-0.2573	0.3594	1
P24063	Itgal	-1.0439	-1.8388	1.1083	1.3468	-1.0439	-1.8388	1.1083	1.3468	3
P24270	Cat	0.4275	0.6666	-0.4783	0.2417	0.4275	0.6666	-0.4783	0.2417	1
P24369	Ppib	0.3672	0.5983	-1.1959	-0.1968	0.3672	0.5983	-1.1959	-0.1968	1
P24452	Capg	-1.2734	-1.9013	-0.3972	0.5794	-1.2734	-1.9013	-0.3972	0.5794	3
P24456	Cyp2d10	0.3435	0.8299	0.4968	0.8502	0.3435	0.8299	0.4968	0.8502	1
P24457	Cyp2d11	-0.8439	0.127	-0.8998	1.8258	-0.8439	0.127	-0.8998	1.8258	4
P24472	Gsta4	0.9823	0.3274	0.2013	-2.453	0.9823	0.3274	0.2013	-2.453	2
P24527	Lta4h	0.5613	-0.2317	-0.1689	-0.8742	0.5613	-0.2317	-0.1689	-0.8742	2
P24547	Impdh2	-0.4048	-0.2963	1.7902	0.5337	-0.4048	-0.2963	1.7902	0.5337	4
P24549	Aldh1a1	-0.0288	0.248	-0.4794	-2.0065	-0.0288	0.248	-0.4794	-2.0065	2
P24638	Acp2	-0.5272	-0.4722	3.1258	2.7293	-0.5272	-0.4722	3.1258	2.7293	4
P24668	M6pr	-0.616	-1.4271	0.3397	1.0897	-0.616	-1.4271	0.3397	1.0897	3
P24721	Asgr2	0.6196	0.0356	-1.4782	-0.3673	0.6196	0.0356	-1.4782	-0.3673	1
P24815	Hsd3b1	-0.3708	1.886	-0.5482	-0.9792	-0.3708	1.886	-0.5482	-0.9792	2
P25444	Rps2	-0.1087	-0.4603	-0.2336	0.3423	-0.1087	-0.4603	-0.2336	0.3423	2
P25446	Fas	-0.3026	-1.5943	0.6621	-0.3714	-0.3026	-1.5943	0.6621	-0.3714	3
P25688	Uox	0.4098	0.1254	-0.0182	-0.239	0.4098	0.1254	-0.0182	-0.239	1
P25911	Lyn	-0.6296	-0.9638	0.7532	0.1996	-0.6296	-0.9638	0.7532	0.1996	3
P26039	Tln1	-0.4637	-0.4981	1.0735	1.1539	-0.4637	-0.4981	1.0735	1.1539	4
P26040	Ezr	-0.5853	-0.0547	-1.0134	0.266	-0.5853	-0.0547	-1.0134	0.266	2
P26041	Msn	-0.509	-1.0047	-0.5641	1.3319	-0.509	-1.0047	-0.5641	1.3319	3
P26043	Rdx	-0.0791	1.1255	-0.2381	-0.3688	-0.0791	1.1255	-0.2381	-0.3688	1
P26150	Hsd3b3	-0.438	1.3125	0.4061	-0.1468	-0.438	1.3125	0.4061	-0.1468	4
P26231	Ctnna1	-1.1746	-1.4103	0.3097	-0.0047	-1.1746	-1.4103	0.3097	-0.0047	3
P26262	Klkb1	-1.4898	-0.1552	-1.0299	-1.4574	-1.4898	-0.1552	-1.0299	-1.4574	2
P26443	Glud1	0.7927	0.4952	-1.03	-1.5608	0.7927	0.4952	-1.03	-1.5608	2
P26450	Pik3r1	0.5406	-0.8958	0.9164	1.5428	0.5406	-0.8958	0.9164	1.5428	4
P26516	Psmd7	-0.2299	-0.169	0.1065	-0.2153	-0.2299	-0.169	0.1065	-0.2153	3
P26638	Sars	-0.1741	0.0093	0.6467	-4.3676	-0.1741	0.0093	0.6467	-4.3676	2
P26645	Marcks	-1.7348	-2.3445	0.2598	0.8537	-1.7348	-2.3445	0.2598	0.8537	3
P26928	Mst1	0.7435	0.5452	0.1632	0.9576	0.7435	0.5452	0.1632	0.9576	1
P27046	Man2a1	-0.0329	0.3438	0.7858	1.529	-0.0329	0.3438	0.7858	1.529	4
P27546	Map4	-1.1983	2.126	-0.805	-0.8884	-1.1983	2.126	-0.805	-0.8884	2
P27601	Gna13	-0.5922	-0.88	0.2222	-0.4661	-0.5922	-0.88	0.2222	-0.4661	3
P27612	Plaa	-0.9813	-0.5452	1.7004	1.0435	-0.9813	-0.5452	1.7004	1.0435	3
P27656	Lipc	3.821	2.3459	-1.3055	-0.5753	3.821	2.3459	-1.3055	-0.5753	1
P27659	Rpl3	0.1475	0.2265	-0.3084	0.5198	0.1475	0.2265	-0.3084	0.5198	1
P27661	H2afx	0.0216	-1.0566	-0.5839	-0.8667	0.0216	-1.0566	-0.5839	-0.8667	2
P27773	Pdia3	0.321	0.4031	-0.4972	-0.0168	0.321	0.4031	-0.4972	-0.0168	1
P27786	Cyp17a1	-0.1964	-0.002	-0.0842	-0.2215	-0.1964	-0.002	-0.0842	-0.2215	3
P27808	Mgat1	-0.143	0.2023	0.6298	1.221	-0.143	0.2023	0.6298	1.221	4
P28063	Psmb8	-0.163	0.1014	-0.6435	-0.3803	-0.163	0.1014	-0.6435	-0.3803	2
P28230	Gjb1	0.4998	0.5085	0.1226	-1.8045	0.4998	0.5085	0.1226	-1.8045	2
P28271	Aco1	0.5861	0.4248	-0.6398	-1.8441	0.5861	0.4248	-0.6398	-1.8441	2
P28293	Ctsg	0.3793	-0.3127	2.0173	0.5699	0.3793	-0.3127	2.0173	0.5699	4
P28352	Apex1	-1.4385	-0.8173	-0.5818	-1.3743	-1.4385	-0.8173	-0.5818	-1.3743	2
P28474	Adh5	0.702	0.1734	-1.2827	-2.7394	0.702	0.1734	-1.2827	-2.7394	2
P28650	Adssl1	2.1696	-0.452	-0.0585	-0.2542	2.1696	-0.452	-0.0585	-0.2542	1
P28653	Bgn	1.1416	1.0538	0.7114	-1.5046	1.1416	1.0538	0.7114	-1.5046	1
P28654	Dcn	1.7842	1.313	0.3844	-0.4296	1.7842	1.313	0.3844	-0.4296	1
P28656	Nap1l1	0.3971	-0.0935	-0.4526	-0.1647	0.3971	-0.0935	-0.4526	-0.1647	1
P28660	Nckap1	0.1246	0.5748	2.9392	3.2933	0.1246	0.5748	2.9392	3.2933	4
P28665	Mug1	0.8662	1.1271	0.3714	1.3927	0.8662	1.1271	0.3714	1.3927	1
P28666	Mug2	1.9848	1.6303	0.6839	1.5858	1.9848	1.6303	0.6839	1.5858	1
P28667	Marcksl1	-0.7911	-0.7241	-0.9565	0.4229	-0.7911	-0.7241	-0.9565	0.4229	2
P28825	Mep1a	-1.4104	0.7277	-0.5341	-0.3168	-1.4104	0.7277	-0.5341	-0.3168	2
P28843	Dpp4	-0.3044	0.1494	-0.0321	0.9621	-0.3044	0.1494	-0.0321	0.9621	4
P29341	Pabpc1	0.4917	0.4992	-1.4381	-1.0525	0.4917	0.4992	-1.4381	-1.0525	2
P29351	Ptpn6	-2.1592	-1.6632	0.911	1.1318	-2.1592	-1.6632	0.911	1.1318	3
P29387	Gnb4	-1.8899	-0.2521	0.5642	1.114	-1.8899	-0.2521	0.5642	1.114	3
P29391	Ftl1	0.2072	-0.2838	2.0708	0.3276	0.2072	-0.2838	2.0708	0.3276	4
P29416	Hexa	-1.162	-0.7647	2.301	2.3697	-1.162	-0.7647	2.301	2.3697	4
P29533	Vcam1	-0.2404	-0.2118	1.5705	1.5099	-0.2404	-0.2118	1.5705	1.5099	4
P29699	Ahsg	1.6234	0.5772	-0.7244	-0.5326	1.6234	0.5772	-0.7244	-0.5326	1
P29758	Oat	-0.0166	-0.7207	0.4764	-0.0911	-0.0166	-0.7207	0.4764	-0.0911	3
P29788	Vtn	3.3388	2.9575	1.0741	1.4002	3.3388	2.9575	1.0741	1.4002	1
P30115	Gsta3	0.5737	0.5948	-0.1208	-1.3365	0.5737	0.5948	-0.1208	-1.3365	2
P30204	Msr1	-0.083	-1.6624	-0.0427	2.4265	-0.083	-1.6624	-0.0427	2.4265	4
P30275	Ckmt1	-0.6672	0.5214	-1.5312	-0.6331	-0.6672	0.5214	-1.5312	-0.6331	2
P30355	Alox5ap	-0.6814	-0.2236	0.6831	1.7327	-0.6814	-0.2236	0.6831	1.7327	4
P30412	Ppic	0.4611	-1.14	-0.5519	0.7637	0.4611	-1.14	-0.5519	0.7637	3
P30416	Fkbp4	0.656	0.332	-0.1617	-0.0639	0.656	0.332	-0.1617	-0.0639	1
P30999	Ctnnd1	-0.6754	-1.2648	-0.1031	-0.8344	-0.6754	-1.2648	-0.1031	-0.8344	3
P31230	Aimp1	0.2211	1.403	-0.5869	0.5956	0.2211	1.403	-0.5869	0.5956	1
P31649	Slc6a13	-0.4019	-0.073	1.3365	-1.8097	-0.4019	-0.073	1.3365	-1.8097	1
P31651	Slc6a12	-0.124	-1.6867	0.3904	-1.3924	-0.124	-1.6867	0.3904	-1.3924	3
P31786	Dbi	1.9087	-0.3559	0.0223	0.9012	1.9087	-0.3559	0.0223	0.9012	1
P31809	Ceacam1	-0.4868	-1.3797	0.6148	-0.9439	-0.4868	-1.3797	0.6148	-0.9439	3
P31938	Map2k1	-1.025	-0.5287	0.3057	1.201	-1.025	-0.5287	0.3057	1.201	4
P31996	Cd68	-1.6531	-2.448	0.879	2.4198	-1.6531	-2.448	0.879	2.4198	3
P32020	Scp2	0.4258	1.7712	-0.1338	-0.8241	0.4258	1.7712	-0.1338	-0.8241	1
P32233	Drg1	-0.467	-0.0249	-0.6624	0.3566	-0.467	-0.0249	-0.6624	0.3566	2
P32261	Serpinc1	1.9542	0.6846	-0.2598	0.3997	1.9542	0.6846	-0.2598	0.3997	1
P32507	Nectin2	0.5622	-1.4125	1.4301	1.4503	0.5622	-1.4125	1.4301	1.4503	4
P32883	Kras	-0.9401	0.0981	-1.0084	-2.0412	-0.9401	0.0981	-1.0084	-2.0412	2
P32921	Wars	-1.278	-0.7642	0.0766	-0.4185	-1.278	-0.7642	0.0766	-0.4185	3
P33267	Cyp2f2	0.6082	1.1024	0.4547	0.4247	0.6082	1.1024	0.4547	0.4247	1
P33587	Proc	1.6841	2.498	-1.3861	0.0119	1.6841	2.498	-1.3861	0.0119	1
P33622	Apoc3	2.3181	1.7497	-0.921	-0.4191	2.3181	1.7497	-0.921	-0.4191	1
P34914	Ephx2	-0.4655	0.0928	0.7104	0.6378	-0.4655	0.0928	0.7104	0.6378	4
P34927	Asgr1	0.8686	0.2246	-0.5577	-0.3768	0.8686	0.2246	-0.5577	-0.3768	1
P34928	Apoc1	0.6501	0.0933	-1.5246	0.3233	0.6501	0.0933	-1.5246	0.3233	1
P35123	Usp4	-0.4329	0.6766	-0.7562	-0.1083	-0.4329	0.6766	-0.7562	-0.1083	2
P35235	Ptpn11	0.148	-0.7498	-0.5514	-0.1625	0.148	-0.7498	-0.5514	-0.1625	2
P35278	Rab5c	-0.6826	0.2155	-1.8762	-0.8891	-0.6826	0.2155	-1.8762	-0.8891	2
P35279	Rab6a	-0.1717	-0.0215	1.6322	1.5486	-0.1717	-0.0215	1.6322	1.5486	4
P35282	Rab21	-0.0744	-0.1094	-1.7353	-0.8261	-0.0744	-0.1094	-1.7353	-0.8261	2
P35283	Rab12	0.6864	0.3609	-1.3483	-0.1107	0.6864	0.3609	-1.3483	-0.1107	1
P35285	Rab22a	-0.8559	-0.9767	0.1702	0.4267	-0.8559	-0.9767	0.1702	0.4267	3
P35290	Rab24	-0.4223	0.9796	1.2232	1.7172	-0.4223	0.9796	1.2232	1.7172	4
P35292	Rab17	-0.2362	0.2569	-0.1399	1.5536	-0.2362	0.2569	-0.1399	1.5536	4
P35293	Rab18	-0.9079	0.1845	-0.0976	0.4426	-0.9079	0.1845	-0.0976	0.4426	4
P35441	Thbs1	-0.9269	-0.8322	-1.0336	-1.4414	-0.9269	-0.8322	-1.0336	-1.4414	2
P35486	Pdha1	0.1491	-0.5515	-0.3411	-0.6936	0.1491	-0.5515	-0.3411	-0.6936	2
P35492	Hal	0.8206	0.384	-0.8892	-1.8834	0.8206	0.384	-0.8892	-1.8834	2
P35505	Fah	0.1823	-0.0745	-0.6985	-0.5232	0.1823	-0.0745	-0.6985	-0.5232	2
P35564	Canx	0.1067	0.2214	-0.074	0.5317	0.1067	0.2214	-0.074	0.5317	1
P35576	G6pc	0.1279	0.6048	0.0352	1.1598	0.1279	0.6048	0.0352	1.1598	1
P35585	Ap1m1	-0.4635	0.062	-0.101	0.5754	-0.4635	0.062	-0.101	0.5754	4
P35700	Prdx1	0.2715	0.1736	-0.3439	-0.2299	0.2715	0.1736	-0.3439	-0.2299	1
P35737	H2-DMb1	-2.2463	0.2574	0.9827	0.5087	-2.2463	0.2574	0.9827	0.5087	3
P35762	Cd81	-0.6682	-1.0744	0.4237	0.4281	-0.6682	-1.0744	0.4237	0.4281	3
P35821	Ptpn1	-0.9363	-0.6022	1.1961	1.0371	-0.9363	-0.6022	1.1961	1.0371	3
P35822	Ptprk	1.4524	0.8114	0.5745	-1.1606	1.4524	0.8114	0.5745	-1.1606	1
P35918	Kdr	-1.2006	0.6723	0.335	0.2352	-1.2006	0.6723	0.335	0.2352	4
P35951	Ldlr	3.2038	1.8064	-1.0215	-2.3227	3.2038	1.8064	-1.0215	-2.3227	1
P35979	Rpl12	0.3728	0.3694	-1.0644	-0.4404	0.3728	0.3694	-1.0644	-0.4404	1
P35980	Rpl18	0.2082	0.3908	0.13	0.7273	0.2082	0.3908	0.13	0.7273	1
P36371	Tap2	-1.226	-1.208	0.6906	0.8867	-1.226	-1.208	0.6906	0.8867	3
P36423	Tbxas1	-0.4636	-0.1202	1.2981	1.0396	-0.4636	-0.1202	1.2981	1.0396	4
P36552	Cpox	-0.3188	-0.2919	0.0792	-0.6539	-0.3188	-0.2919	0.0792	-0.6539	3
P36993	Ppm1b	0.7079	1.3538	-2.3777	-2.6323	0.7079	1.3538	-2.3777	-2.6323	2
P37040	Por	0.1413	0.6241	-0.2277	0.3279	0.1413	0.6241	-0.2277	0.3279	1
P38060	Hmgcl	0.3499	-0.323	-0.2593	-0.4208	0.3499	-0.323	-0.2593	-0.4208	2
P38647	Hspa9	-0.1212	-0.5989	0.1481	-0.56	-0.1212	-0.5989	0.1481	-0.56	3
P39039	Mbl1	0.1908	1.3971	0.7543	0.5616	0.1908	1.3971	0.7543	0.5616	1
P39053	Dnm1	0.2232	-0.3871	-0.2172	-0.0792	0.2232	-0.3871	-0.2172	-0.0792	2
P39054	Dnm2	0.4223	-0.0918	-0.0027	-0.3517	0.4223	-0.0918	-0.0027	-0.3517	1
P39061	Col18a1	1.418	3.1647	1.5052	2.8179	1.418	3.1647	1.5052	2.8179	1
P39098	Man1a2	0.015	0.1492	0.8374	1.322	0.015	0.1492	0.8374	1.322	4
P39447	Tjp1	0.0403	-0.425	0.1757	-0.4601	0.0403	-0.425	0.1757	-0.4601	3
P39876	Timp3	2.0564	0.9797	0.716	-0.1046	2.0564	0.9797	0.716	-0.1046	1
P40124	Cap1	-0.0415	-1.1452	-2.0006	-2.2394	-0.0415	-1.1452	-2.0006	-2.2394	2
P40142	Tkt	-0.3997	-0.5496	-1.5324	-2.0654	-0.3997	-0.5496	-1.5324	-2.0654	2
P40237	Cd82	0.2568	0.1722	1.6864	0.0837	0.2568	0.1722	1.6864	0.0837	4
P40336	Vps26a	-0.1966	-0.1154	0.5734	1.7267	-0.1966	-0.1154	0.5734	1.7267	4
P40630	Tfam	-0.3057	-0.4978	-2.4315	-1.0911	-0.3057	-0.4978	-2.4315	-1.0911	2
P40936	Inmt	0.7513	0.3472	0.0513	-1.5302	0.7513	0.3472	0.0513	-1.5302	2
P41105	Rpl28	-0.0185	0.0308	0.1593	-0.0177	-0.0185	0.0308	0.1593	-0.0177	1
P41216	Acsl1	0.1205	0.3033	0.0779	-0.0528	0.1205	0.3033	0.0779	-0.0528	1
P41233	Abca1	0.4014	-0.326	2.3772	0.5163	0.4014	-0.326	2.3772	0.5163	4
P41241	Csk	0.2854	-0.1116	0.5888	1.124	0.2854	-0.1116	0.5888	1.124	4
P41245	Mmp9	-1.3374	-0.433	-2.0072	0.3294	-1.3374	-0.433	-2.0072	0.3294	2
P41317	Mbl2	0.6027	0.588	0.3365	0.719	0.6027	0.588	0.3365	0.719	1
P42125	Eci1	-0.2128	-0.2625	0.0467	-0.0864	-0.2128	-0.2625	0.0467	-0.0864	3
P42208	Septin2	-0.1476	-0.6071	0.7667	0.6973	-0.1476	-0.6071	0.7667	0.6973	4
P42225	Stat1	-1.3754	-2.0675	1.5913	0.6202	-1.3754	-2.0675	1.5913	0.6202	3
P42227	Stat3	0.0371	-0.0561	1.9614	1.4556	0.0371	-0.0561	1.9614	1.4556	4
P42232	Stat5b	-3.2381	1.4188	0.7542	-0.7585	-3.2381	1.4188	0.7542	-0.7585	3
P42567	Eps15	1.1827	0.5594	2.8492	1.1761	1.1827	0.5594	2.8492	1.1761	4
P42669	Pura	0.0991	0.7591	-0.5508	1.1821	0.0991	0.7591	-0.5508	1.1821	1
P42703	Lifr	0.1895	0.8816	1.7458	-0.6268	0.1895	0.8816	1.7458	-0.6268	1
P42925	Pxmp2	-0.4046	1.013	0.3784	1.4904	-0.4046	1.013	0.3784	1.4904	4
P42932	Cct8	0.4736	0.6063	0.6488	-0.7133	0.4736	0.6063	0.6488	-0.7133	1
P43006	Slc1a2	0.188	0.1877	2.4841	-0.0934	0.188	0.1877	2.4841	-0.0934	4
P43274	Hist1h1e	-1.3629	-0.4141	-0.8947	-1.7772	-1.3629	-0.4141	-0.8947	-1.7772	2
P43406	Itgav	-0.4548	0.0712	0.582	0.5287	-0.4548	0.0712	0.582	0.5287	4
P43883	Plin2	4.1807	3.2462	0.6509	0.872	4.1807	3.2462	0.6509	0.872	1
P45376	Akr1b1	-0.327	-0.3526	-0.7945	-1.5723	-0.327	-0.3526	-0.7945	-1.5723	2
P45700	Man1a1	-0.1607	0.3436	0.4179	1.325	-0.1607	0.3436	0.4179	1.325	4
P45878	Fkbp2	1.6695	0.6581	-0.8719	0.3602	1.6695	0.6581	-0.8719	0.3602	1
P45952	Acadm	0.3242	-0.0324	-0.9661	-1.1129	0.3242	-0.0324	-0.9661	-1.1129	2
P46096	Syt1	0.0338	-0.8657	1.4361	-0.73	0.0338	-0.8657	1.4361	-0.73	3
P46412	Gpx3	1.1076	1.077	-0.8642	0.3425	1.1076	1.077	-0.8642	0.3425	1
P46460	Nsf	0.4616	1.1486	-2.2839	-0.5097	0.4616	1.1486	-2.2839	-0.5097	2
P46467	Vps4b	0.965	4.3831	-1.114	-0.0893	0.965	4.3831	-1.114	-0.0893	1
P46471	Psmc2	0.8051	0.108	-0.8749	-2.0959	0.8051	0.108	-0.8749	-2.0959	2
P46638	Rab11b	-1.169	-0.2513	-0.7649	0.3313	-1.169	-0.2513	-0.7649	0.3313	3
P46656	Fdx1	-0.2484	-0.1717	-0.3113	-0.6544	-0.2484	-0.1717	-0.3113	-0.6544	2
P46735	Myo1b	-0.4383	0.0066	2.0752	0.0947	-0.4383	0.0066	2.0752	0.0947	4
P46737	Brcc3	1.1011	3.2666	-0.1984	-0.7175	1.1011	3.2666	-0.1984	-0.7175	1
P46935	Nedd4	-0.1052	1.2004	-1.0146	0.7313	-0.1052	1.2004	-1.0146	0.7313	1
P46978	Stt3a	0.0051	0.1055	0.1173	0.7636	0.0051	0.1055	0.1173	0.7636	1
P47199	Cryz	0.8073	0.5583	-3.2709	-2.3753	0.8073	0.5583	-3.2709	-2.3753	2
P47738	Aldh2	0.1866	-0.191	0.6052	0.0293	0.1866	-0.191	0.6052	0.0293	3
P47740	Aldh3a2	-0.6548	-0.1555	0.6184	0.7268	-0.6548	-0.1555	0.6184	0.7268	3
P47753	Capza1	-0.9448	-0.6192	2.7697	1.499	-0.9448	-0.6192	2.7697	1.499	4
P47754	Capza2	-0.3545	-0.3427	1.3896	0.5675	-0.3545	-0.3427	1.3896	0.5675	4
P47757	Capzb	0.3345	-0.4526	-0.2307	-0.5387	0.3345	-0.4526	-0.2307	-0.5387	2
P47791	Gsr	-0.1606	-0.4979	-0.3494	-0.571	-0.1606	-0.4979	-0.3494	-0.571	2
P47802	Mtx1	-0.833	-0.8252	0.6839	0.3392	-0.833	-0.8252	0.6839	0.3392	3
P47857	Pfkm	1.6167	-0.3608	-0.0305	0.339	1.6167	-0.3608	-0.0305	0.339	1
P47877	Igfbp2	0.8393	-0.3165	-0.3423	-1.5765	0.8393	-0.3165	-0.3423	-1.5765	2
P47911	Rpl6	0.196	0.3579	0.0379	0.5418	0.196	0.3579	0.0379	0.5418	1
P47934	Crat	-0.5935	-0.362	0.3456	1.3218	-0.5935	-0.362	0.3456	1.3218	4
P47962	Rpl5	0.3037	0.1392	0.1056	0.468	0.3037	0.1392	0.1056	0.468	1
P47963	Rpl13	0.2857	0.6516	-0.0033	0.2355	0.2857	0.6516	-0.0033	0.2355	1
P47964	Rpl36	0.1829	0.645	-0.4508	-0.2669	0.1829	0.645	-0.4508	-0.2669	1
P48036	Anxa5	-1.1756	-0.8217	1.0245	-1.061	-1.1756	-0.8217	1.0245	-1.061	3
P48193	Epb41	-1.0333	-0.2181	-2.2965	-1.06	-1.0333	-0.2181	-2.2965	-1.06	2
P48410	Abcd1	-0.7288	-0.2721	0.7534	0.2248	-0.7288	-0.2721	0.7534	0.2248	3
P48678	Lmna	-0.5164	0.3152	0.943	-0.5388	-0.5164	0.3152	0.943	-0.5388	1
P48758	Cbr1	0.7523	0.9219	-1.9492	-2.6245	0.7523	0.9219	-1.9492	-2.6245	2
P48774	Gstm5	0.052	0.1693	-0.2193	-0.1636	0.052	0.1693	-0.2193	-0.1636	1
P48776	Tdo2	1.9663	1.7492	1.0795	0.8973	1.9663	1.7492	1.0795	0.8973	1
P48962	Slc25a4	-1.424	-0.9354	0.1801	0.4946	-1.424	-0.9354	0.1801	0.4946	3
P49182	Serpind1	1.1049	1.2279	-0.6152	0.1672	1.1049	1.2279	-0.6152	0.1672	1
P49222	Epb42	-0.126	-0.1164	-1.9048	0.111	-0.126	-0.1164	-1.9048	0.111	2
P49290	Epx	-1.3402	-1.5646	1.1668	1.4347	-1.3402	-1.5646	1.1668	1.4347	3
P49429	Hpd	1.3771	0.1673	-1.2687	-1.9202	1.3771	0.1673	-1.2687	-1.9202	2
P49443	Ppm1a	1.4116	0.5221	-1.9082	-1.2917	1.4116	0.5221	-1.9082	-1.2917	2
P49586	Pcyt1a	0.273	0.4375	-0.9767	-0.5659	0.273	0.4375	-0.9767	-0.5659	1
P49615	Cdk5	0.1865	0.9666	1.7093	-0.2895	0.1865	0.9666	1.7093	-0.2895	1
P49710	Hcls1	0.9169	-0.7733	0.3547	-0.4784	0.9169	-0.7733	0.3547	-0.4784	2
P49722	Psma2	0.212	0.4899	0.4333	0.4263	0.212	0.4899	0.4333	0.4263	1
P49935	Ctsh	-0.5939	-1.0452	2.7013	3.5378	-0.5939	-1.0452	2.7013	3.5378	4
P50136	Bckdha	0.3122	-0.3727	0.3344	-0.2478	0.3122	-0.3727	0.3344	-0.2478	3
P50171	Hsd17b8	0.2336	0.1565	-1.0849	-1.0611	0.2336	0.1565	-1.0849	-1.0611	2
P50172	Hsd11b1	0.0009	0.4016	-0.1394	1.0526	0.0009	0.4016	-0.1394	1.0526	1
P50236	Sult2a2	0.0992	0.1972	-0.9775	-1.3655	0.0992	0.1972	-0.9775	-1.3655	2
P50247	Ahcy	0.5522	0.2622	-0.3294	-2.0091	0.5522	0.2622	-0.3294	-2.0091	2
P50285	Fmo1	-0.0937	0.505	0.2904	0.8369	-0.0937	0.505	0.2904	0.8369	1
P50295	Nat2	0.8924	1.8	1.1966	1.1249	0.8924	1.8	1.1966	1.1249	1
P50396	Gdi1	-0.2575	-0.6011	0.9798	-1.5065	-0.2575	-0.6011	0.9798	-1.5065	3
P50427	Sts	0.397	0.1104	0.3179	0.8144	0.397	0.1104	0.3179	0.8144	4
P50428	Arsa	-0.5432	-0.8511	1.285	1.1664	-0.5432	-0.8511	1.285	1.1664	4
P50429	Arsb	-0.9597	-0.9843	0.8564	1.2318	-0.9597	-0.9843	0.8564	1.2318	4
P50431	Shmt1	0.8951	0.5526	-1.4159	-3.1792	0.8951	0.5526	-1.4159	-3.1792	2
P50446	Krt6a	-0.9344	-0.0658	-0.6773	-0.9807	-0.9344	-0.0658	-0.6773	-0.9807	2
P50462	Csrp3	0.7289	1.0332	1.2706	1.5786	0.7289	1.0332	1.2706	1.5786	4
P50516	Atp6v1a	-1.7727	-0.9805	-1.8396	-0.513	-1.7727	-0.9805	-1.8396	-0.513	2
P50518	Atp6v1e1	-1.1906	-1.3279	-2.6173	-1.3577	-1.1906	-1.3279	-2.6173	-1.3577	2
P50544	Acadvl	-0.6846	-0.3977	0.2552	-0.0451	-0.6846	-0.3977	0.2552	-0.0451	3
P50580	Pa2g4	0.1174	-0.0106	-2.244	-0.5979	0.1174	-0.0106	-2.244	-0.5979	2
P51150	Rab7a	-0.0552	0.455	0.3282	0.5463	-0.0552	0.455	0.3282	0.5463	1
P51174	Acadl	-0.2018	-0.8676	0.6769	0.3003	-0.2018	-0.8676	0.6769	0.3003	3
P51175	Ppox	-0.3735	-0.2121	-0.8161	-0.9393	-0.3735	-0.2121	-0.8161	-0.9393	2
P51437	Camp	-2.4206	-0.5737	-0.5438	0.9582	-2.4206	-0.5737	-0.5438	0.9582	3
P51569	Gla	-1.7909	-2.3115	1.9956	4.043	-1.7909	-2.3115	1.9956	4.043	4
P51655	Gpc4	0.7221	0.8234	1.22	0.6634	0.7221	0.8234	1.22	0.6634	1
P51658	Hsd17b2	0.4824	2.36	-1.241	-1.6372	0.4824	2.36	-1.241	-1.6372	1
P51660	Hsd17b4	-0.2043	0.533	-0.8727	-0.7121	-0.2043	0.533	-0.8727	-0.7121	2
P51830	Adcy9	-0.1516	-0.4897	-1.8875	-2.4937	-0.1516	-0.4897	-1.8875	-2.4937	2
P51855	Gss	0.7824	-0.1216	0.3125	-0.8116	0.7824	-0.1216	0.3125	-0.8116	2
P51863	Atp6v0d1	0.3904	-0.5072	2.2206	2.8525	0.3904	-0.5072	2.2206	2.8525	4
P51881	Slc25a5	-1.0011	-0.9606	0.5347	0.4515	-1.0011	-0.9606	0.5347	0.4515	3
P51885	Lum	2.3005	1.4378	-1.3914	-1.669	2.3005	1.4378	-1.3914	-1.669	2
P51910	Apod	1.1835	0.8493	0.3846	0.3775	1.1835	0.8493	0.3846	0.3775	1
P52019	Sqle	0.3547	-0.2294	-0.3018	0.7025	0.3547	-0.2294	-0.3018	0.7025	1
P52196	Tst	0.6782	0.2878	-0.8589	-1.2599	0.6782	0.2878	-0.8589	-1.2599	2
P52332	Jak1	-1.2512	-1.601	0.5774	-0.1011	-1.2512	-1.601	0.5774	-0.1011	3
P52430	Pon1	-0.3044	-0.2475	0.2557	0.0812	-0.3044	-0.2475	0.2557	0.0812	3
P52480	Pkm	-0.5554	-1.0206	-0.1769	-1.1517	-0.5554	-1.0206	-0.1769	-1.1517	3
P52503	Ndufs6	0.4834	0.0483	-0.9784	-0.8727	0.4834	0.0483	-0.9784	-0.8727	2
P52760	Rida	0.212	-0.3468	-0.2492	-0.4615	0.212	-0.3468	-0.2492	-0.4615	2
P52792	Gck	-0.1681	0.4867	1.2367	0.3126	-0.1681	0.4867	1.2367	0.3126	4
P52795	Efnb1	-0.9235	0.0139	0.8481	-0.7737	-0.9235	0.0139	0.8481	-0.7737	3
P52825	Cpt2	-0.2131	-0.2521	-0.0582	-0.3476	-0.2131	-0.2521	-0.0582	-0.3476	3
P52840	Sult1a1	1.256	0.9399	0.408	-2.6574	1.256	0.9399	0.408	-2.6574	2
P52843	Sult2a1	-1.3177	0.2601	-0.8468	-1.4384	-1.3177	0.2601	-0.8468	-1.4384	2
P52850	Ndst2	-0.0263	-0.2117	1.0273	0.9606	-0.0263	-0.2117	1.0273	0.9606	4
P53026	Rpl10a	0.3565	0.5149	-0.645	-0.0139	0.3565	0.5149	-0.645	-0.0139	1
P53395	Dbt	0.0808	-0.3725	-0.9164	-1.1481	0.0808	-0.3725	-0.9164	-1.1481	2
P53564	Cux1	0.2344	0.3384	-0.206	-1.8915	0.2344	0.3384	-0.206	-1.8915	2
P53657	Pklr	0.6799	0.5722	-1.0906	-2.3909	0.6799	0.5722	-1.0906	-2.3909	2
P53702	Hccs	-0.9215	-0.3922	0.1883	-0.1096	-0.9215	-0.3922	0.1883	-0.1096	3
P53798	Fdft1	-0.1369	-1.1576	0.8023	1.0907	-0.1369	-1.1576	0.8023	1.0907	4
P53808	Pctp	-1.0206	-0.2033	0.5979	-0.1866	-1.0206	-0.2033	0.5979	-0.1866	3
P53811	Pitpnb	0.9971	-1.4117	2.5257	0.8067	0.9971	-1.4117	2.5257	0.8067	4
P53986	Slc16a1	-0.5715	-0.6057	-0.2541	-0.6389	-0.5715	-0.6057	-0.2541	-0.6389	3
P53994	Rab2a	-0.2806	0.4245	1.3499	1.6165	-0.2806	0.4245	1.3499	1.6165	4
P54071	Idh2	0.0524	-0.1442	-0.6775	-1.7781	0.0524	-0.1442	-0.6775	-1.7781	2
P54099	Polg	-3.3898	-0.3635	-1.0304	-1.3376	-3.3898	-0.3635	-1.0304	-1.3376	2
P54116	Stom	-0.8604	-0.7086	-0.7021	-0.0167	-0.8604	-0.7086	-0.7021	-0.0167	2
P54728	Rad23b	1.1069	1.1696	1.0855	-0.4108	1.1069	1.1696	1.0855	-0.4108	1
P54751	St3gal1	0.3067	0.2032	0.6739	0.6597	0.3067	0.2032	0.6739	0.6597	1
P54761	Ephb4	-1.8619	-1.5772	0.1931	-0.554	-1.8619	-1.5772	0.1931	-0.554	3
P54775	Psmc4	0.8415	-0.0951	-1.1275	-4.5635	0.8415	-0.0951	-1.1275	-4.5635	2
P54797	Tango2	-0.8642	-0.772	-0.0031	0.2071	-0.8642	-0.772	-0.0031	0.2071	3
P54818	Galc	-2.0575	-2.4742	0.5976	3.9504	-2.0575	-2.4742	0.5976	3.9504	4
P54822	Adsl	0.5723	0.0288	-0.567	-0.1903	0.5723	0.0288	-0.567	-0.1903	1
P54823	Ddx6	0.211	0.5502	0.0826	1.1035	0.211	0.5502	0.0826	1.1035	1
P54869	Hmgcs2	0.5896	0.3819	-0.7274	-0.2344	0.5896	0.3819	-0.7274	-0.2344	1
P55014	Slc12a1	0.3193	-0.6072	-0.5516	-2.9019	0.3193	-0.6072	-0.5516	-2.9019	2
P55065	Pltp	5.5599	2.7474	-0.3754	1.2897	5.5599	2.7474	-0.3754	1.2897	1
P55096	Abcd3	-0.4597	0.514	0.1955	-0.2711	-0.4597	0.514	0.1955	-0.2711	3
P55098	Pex2	-1.3996	0.1388	0.8022	1.2979	-1.3996	0.1388	0.8022	1.2979	4
P55258	Rab8a	0.6859	-0.1783	-0.9296	-1.3737	0.6859	-0.1783	-0.9296	-1.3737	2
P55264	Adk	0.6009	0.4725	-1.2304	-3.8268	0.6009	0.4725	-1.2304	-3.8268	2
P55284	Cdh5	0.7466	0.1442	-1.613	-1.5334	0.7466	0.1442	-1.613	-1.5334	2
P55292	Dsc2	1.5496	0.9271	0.2831	-1.2306	1.5496	0.9271	0.2831	-1.2306	1
P55302	Lrpap1	1.6882	1.4601	-0.4268	0.0175	1.6882	1.4601	-0.4268	0.0175	1
P55772	Entpd1	-0.0663	0.0956	0.4546	1.4113	-0.0663	0.0956	0.4546	1.4113	4
P55937	Golga3	-2.9211	-0.5162	-1.0974	-0.0807	-2.9211	-0.5162	-1.0974	-0.0807	2
P56135	Atp5mf	-0.6502	-0.0322	1.1346	0.3235	-0.6502	-0.0322	1.1346	0.3235	3
P56213	Gfer	-0.3092	-1.0671	0.0057	-0.0821	-0.3092	-1.0671	0.0057	-0.0821	3
P56371	Rab4a	2.2993	-0.0983	-0.6165	0.9032	2.2993	-0.0983	-0.6165	0.9032	1
P56376	Acyp1	-1.4042	1.3683	-0.4081	0.1307	-1.4042	1.3683	-0.4081	0.1307	1
P56382	Atp5f1e	-0.1936	0.5905	-2.5975	-1.8997	-0.1936	0.5905	-2.5975	-1.8997	2
P56387	Dynlt3	-0.3425	-1.2817	1.192	0.9768	-0.3425	-1.2817	1.192	0.9768	4
P56391	Cox6b1	-0.5415	-0.583	-0.437	-0.3713	-0.5415	-0.583	-0.437	-0.3713	3
P56395	Cyb5a	0.0865	0.2456	-0.355	0.06	0.0865	0.2456	-0.355	0.06	1
P56399	Usp5	0.9582	1.3798	0.0002	-1.2365	0.9582	1.3798	0.0002	-1.2365	1
P56480	Atp5f1b	-0.8031	-0.6179	0.5213	0.4206	-0.8031	-0.6179	0.5213	0.4206	3
P56528	Cd38	0.4174	0.2026	-1.735	0.3943	0.4174	0.2026	-1.735	0.3943	1
P56542	Dnase2	-0.3688	-0.1309	3.0291	4.8872	-0.3688	-0.1309	3.0291	4.8872	4
P56593	Cyp2a12	0.0779	0.557	0.7642	0.6891	0.0779	0.557	0.7642	0.6891	1
P56654	Cyp2c37	-0.2013	0.6093	-0.1686	0.8063	-0.2013	0.6093	-0.1686	0.8063	1
P56655	Cyp2c38	0.4775	-0.8996	-0.3577	-1.6633	0.4775	-0.8996	-0.3577	-1.6633	2
P56656	Cyp2c39	0.3852	0.7966	-0.1699	0.6606	0.3852	0.7966	-0.1699	0.6606	1
P57716	Ncstn	-0.5199	-0.0564	1.6799	1.7745	-0.5199	-0.0564	1.6799	1.7745	4
P57746	Atp6v1d	1.2231	-0.4789	-1.5456	-0.7338	1.2231	-0.4789	-1.5456	-0.7338	2
P57759	Erp29	0.5907	0.8105	-1.2824	-0.2308	0.5907	0.8105	-1.2824	-0.2308	1
P57776	Eef1d	0.7529	0.5278	-1.5778	-2.1565	0.7529	0.5278	-1.5778	-2.1565	2
P57780	Actn4	1.4874	0.8812	2.5138	1.8716	1.4874	0.8812	2.5138	1.8716	4
P58021	Tm9sf2	-0.2412	-0.4943	0.7756	1.5392	-0.2412	-0.4943	0.7756	1.5392	4
P58044	Idi1	-0.2985	-0.5894	0.4664	-0.8666	-0.2985	-0.5894	0.4664	-0.8666	3
P58059	Mrps21	-0.8805	0.1191	-0.4538	-1.1436	-0.8805	0.1191	-0.4538	-1.1436	2
P58137	Acot8	-0.3557	0.4061	-2.5719	0.313	-0.3557	0.4061	-2.5719	0.313	2
P58158	B3gat3	1.813	0.4348	-0.009	0.5498	1.813	0.4348	-0.009	0.5498	1
P58252	Eef2	0.0164	0.1171	-0.3348	0.1827	0.0164	0.1171	-0.3348	0.1827	1
P58281	Opa1	-0.4545	0.0554	-1.1629	-0.8167	-0.4545	0.0554	-1.1629	-0.8167	2
P58466	Ctdsp1	0.0894	0.7016	-0.3653	-0.6685	0.0894	0.7016	-0.3653	-0.6685	1
P58710	Gulo	-0.3242	0.1016	0.6337	0.9396	-0.3242	0.1016	0.6337	0.9396	4
P58735	Slc26a1	-0.4734	-0.6794	-0.0538	-2.8166	-0.4734	-0.6794	-0.0538	-2.8166	2
P58742	Aaas	-0.2567	0.2464	0.9808	1.3652	-0.2567	0.2464	0.9808	1.3652	4
P58771	Tpm1	-0.3993	-0.3033	2.0945	0.9849	-0.3993	-0.3033	2.0945	0.9849	4
P58802	Tbc1d10a	0.1366	0.4793	1.3568	0.6177	0.1366	0.4793	1.3568	0.6177	1
P58871	Tnks1bp1	1.2485	1.0994	-0.0944	-0.6549	1.2485	1.0994	-0.0944	-0.6549	1
P59017	Bcl2l13	-0.6621	0.3666	0.3843	0.3106	-0.6621	0.3666	0.3843	0.3106	4
P59242	Cgn	-1.5193	-0.7194	-1.5276	2.5786	-1.5193	-0.7194	-1.5276	2.5786	4
P59266	Fitm2	0.5218	0.1793	1.4704	2.0749	0.5218	0.1793	1.4704	2.0749	4
P59325	Eif5	0.5315	0.2755	-0.1042	-1.1558	0.5315	0.2755	-0.1042	-1.1558	2
P59481	Lman2l	-1.54	-2.3956	-0.4677	-0.2275	-1.54	-2.3956	-0.4677	-0.2275	3
P59999	Arpc4	1.1412	0.1974	0.2166	0.2022	1.1412	0.1974	0.2166	0.2022	1
P60229	Eif3e	-0.1895	0.6065	-1.1464	-0.5924	-0.1895	0.6065	-1.1464	-0.5924	2
P60335	Pcbp1	1.0147	0.433	-0.6011	-1.239	1.0147	0.433	-0.6011	-1.239	2
P60521	Gabarapl2	1.4706	2.6073	0.4027	0.796	1.4706	2.6073	0.4027	0.796	1
P60605	Ube2g2	-0.8453	-0.5126	0.367	0.7767	-0.8453	-0.5126	0.367	0.7767	3
P60670	Nploc4	0.8541	0.3888	0.2265	-1.9774	0.8541	0.3888	0.2265	-1.9774	2
P60766	Cdc42	-1.1823	-0.5902	0.8902	-0.7762	-1.1823	-0.5902	0.8902	-0.7762	3
P60843	Eif4a1	-0.8277	-0.5708	0.8568	-0.6187	-0.8277	-0.5708	0.8568	-0.6187	3
P60867	Rps20	-0.7754	-1.0714	-1.0517	0.0485	-0.7754	-1.0714	-1.0517	0.0485	2
P60904	Dnajc5	-0.1512	-0.0806	0.1742	0.3294	-0.1512	-0.0806	0.1742	0.3294	3
P61021	Rab5b	0.5369	2.2024	-1.404	-1.9517	0.5369	2.2024	-1.404	-1.9517	1
P61022	Chp1	1.2381	1.4283	-2.4094	-1.8059	1.2381	1.4283	-2.4094	-1.8059	2
P61027	Rab10	-1.9112	0.0958	-0.5362	0.771	-1.9112	0.0958	-0.5362	0.771	3
P61028	Rab8b	0.0048	-0.3321	-1.1838	-1.4794	0.0048	-0.3321	-1.1838	-1.4794	2
P61087	Ube2k	-1.7772	-1.6794	1.1718	0.6468	-1.7772	-1.6794	1.1718	0.6468	3
P61089	Ube2n	0.9305	0.2561	-1.1141	-1.4431	0.9305	0.2561	-1.1141	-1.4431	2
P61161	Actr2	1.0754	0.2723	2.2992	1.5712	1.0754	0.2723	2.2992	1.5712	4
P61164	Actr1a	1.7612	-0.3778	-0.7649	-0.0377	1.7612	-0.3778	-0.7649	-0.0377	1
P61211	Arl1	-0.2144	0.8077	2.0698	1.3444	-0.2144	0.8077	2.0698	1.3444	4
P61222	Abce1	1.744	-0.1689	0.1777	0.2544	1.744	-0.1689	0.1777	0.2544	1
P61226	Rap2b	0.95	0.6184	0.949	1.1433	0.95	0.6184	0.949	1.1433	1
P61255	Rpl26	0.1568	0.5016	-0.213	0.372	0.1568	0.5016	-0.213	0.372	1
P61358	Rpl27	-0.1136	0.4274	0.1228	0.7866	-0.1136	0.4274	0.1228	0.7866	1
P61458	Pcbd1	1.2516	0.5347	0.1302	-2.6339	1.2516	0.5347	0.1302	-2.6339	2
P61514	Rpl37a	0.2499	0.7801	-0.6914	-0.075	0.2499	0.7801	-0.6914	-0.075	1
P61620	Sec61a1	-0.325	-0.1533	-0.1473	1.3481	-0.325	-0.1533	-0.1473	1.3481	4
P61750	Arf4	-2.5507	-0.5807	-0.3031	-0.6859	-2.5507	-0.5807	-0.3031	-0.6859	2
P61804	Dad1	-0.2956	0.6453	-1.0783	1.3008	-0.2956	0.6453	-1.0783	1.3008	4
P61922	Abat	-0.1698	-0.4683	0.5147	-0.3919	-0.1698	-0.4683	0.5147	-0.3919	3
P61924	Copz1	0.4923	-0.6223	1.1121	0.6817	0.4923	-0.6223	1.1121	0.6817	4
P61961	Ufm1	1.7848	0.7396	-1.0084	0.0861	1.7848	0.7396	-1.0084	0.0861	1
P61967	Ap1s1	-0.5684	-0.8124	-0.4348	0.4536	-0.5684	-0.8124	-0.4348	0.4536	3
P61979	Hnrnpk	-1.4162	-0.7377	-0.6122	0.9069	-1.4162	-0.7377	-0.6122	0.9069	3
P61982	Ywhag	-0.1814	-0.2358	1.7308	-0.4081	-0.1814	-0.2358	1.7308	-0.4081	3
P62071	Rras2	-1.4668	-1.8825	-0.1399	-0.1696	-1.4668	-1.8825	-0.1399	-0.1696	3
P62075	Timm13	0.0884	-0.1575	-0.5783	-0.5804	0.0884	-0.1575	-0.5783	-0.5804	2
P62082	Rps7	-0.3993	1.2055	-0.4775	-0.2908	-0.3993	1.2055	-0.4775	-0.2908	1
P62137	Ppp1ca	0.0422	0.1454	0.6627	0.76	0.0422	0.1454	0.6627	0.76	1
P62141	Ppp1cb	-0.0058	-0.0339	-0.5739	1.0747	-0.0058	-0.0339	-0.5739	1.0747	4
P62192	Psmc1	0.4856	-0.4004	-0.0294	-3.2369	0.4856	-0.4004	-0.0294	-3.2369	2
P62196	Psmc5	-0.3949	0.766	1.1661	-2.2123	-0.3949	0.766	1.1661	-2.2123	3
P62242	Rps8	-0.0078	-0.7743	-0.3704	0.1029	-0.0078	-0.7743	-0.3704	0.1029	3
P62245	Rps15a	-0.2074	-0.7874	-0.2574	0.3098	-0.2074	-0.7874	-0.2574	0.3098	3
P62259	Ywhae	0.6325	0.5435	2.6268	0.3518	0.6325	0.5435	2.6268	0.3518	4
P62264	Rps14	-0.1768	-0.2869	-1.8152	-0.3948	-0.1768	-0.2869	-1.8152	-0.3948	2
P62267	Rps23	0.4643	1.2304	-2.6408	-2.6044	0.4643	1.2304	-2.6408	-2.6044	2
P62281	Rps11	-0.1536	-0.4901	-0.3546	-0.053	-0.1536	-0.4901	-0.3546	-0.053	2
P62301	Rps13	-0.097	0.3202	-0.7748	-0.4025	-0.097	0.3202	-0.7748	-0.4025	2
P62320	Snrpd3	-0.5634	0.1839	-0.2209	2.2302	-0.5634	0.1839	-0.2209	2.2302	4
P62331	Arf6	0.4007	0.666	1.3578	0.4497	0.4007	0.666	1.3578	0.4497	1
P62334	Psmc6	-0.431	0.0195	-0.4551	-1.09	-0.431	0.0195	-0.4551	-1.09	2
P62342	Selenot	-0.77	0.1881	0.3666	1.507	-0.77	0.1881	0.3666	1.507	4
P62627	Dynlrb1	-0.1465	-0.1594	-1.6316	-1.0881	-0.1465	-0.1594	-1.6316	-1.0881	2
P62702	Rps4x	-0.2368	-0.4771	-0.823	0.4127	-0.2368	-0.4771	-0.823	0.4127	2
P62717	Rpl18a	0.1237	0.3728	0.18	0.803	0.1237	0.3728	0.18	0.803	1
P62743	Ap2s1	0.2719	0.9586	-0.9587	-0.1347	0.2719	0.9586	-0.9587	-0.1347	1
P62748	Hpcal1	-0.4308	-0.5715	1.8073	0.6026	-0.4308	-0.5715	1.8073	0.6026	4
P62751	Rpl23a	0.7268	1.3892	-1.3234	-1.0468	0.7268	1.3892	-1.3234	-1.0468	1
P62754	Rps6	0.4459	0.1899	-2.4473	-1.1295	0.4459	0.1899	-2.4473	-1.1295	2
P62806	Hist4h4	-0.9648	-0.9566	0.7573	0.4197	-0.9648	-0.9566	0.7573	0.4197	3
P62814	Atp6v1b2	-1.776	-1.5805	-1.5869	-1.0252	-1.776	-1.5805	-1.5869	-1.0252	2
P62821	Rab1A	-0.5078	0.6718	0.6577	0.2462	-0.5078	0.6718	0.6577	0.2462	4
P62827	Ran	0.1017	-0.5684	-1.6607	-1.9758	0.1017	-0.5684	-1.6607	-1.9758	2
P62830	Rpl23	0.6978	1.3668	-1.6184	-1.1579	0.6978	1.3668	-1.6184	-1.1579	1
P62835	Rap1a	0.1589	-0.8195	1.3073	-0.3489	0.1589	-0.8195	1.3073	-0.3489	3
P62838	Ube2d2	0.4959	0.6434	-0.1836	-0.2247	0.4959	0.6434	-0.1836	-0.2247	1
P62843	Rps15	-0.1053	-1.1203	-3.1575	-1.5097	-0.1053	-1.1203	-3.1575	-1.5097	2
P62849	Rps24	-0.4636	0.2616	-1.0683	-0.5266	-0.4636	0.2616	-1.0683	-0.5266	2
P62852	Rps25	0.3663	1.0818	-0.2392	-2.0664	0.3663	1.0818	-0.2392	-2.0664	2
P62855	Rps26	-0.1832	0.5432	-2.7857	-1.4266	-0.1832	0.5432	-2.7857	-1.4266	2
P62858	Rps28	1.0515	1.454	-0.8326	0.9159	1.0515	1.454	-0.8326	0.9159	1
P62874	Gnb1	-1.0531	-1.6912	0.1833	-1.4084	-1.0531	-1.6912	0.1833	-1.4084	3
P62880	Gnb2	-0.9084	-2.1058	0.7547	-0.8707	-0.9084	-2.1058	0.7547	-0.8707	3
P62889	Rpl30	0.4238	0.1803	0.4937	0.9704	0.4238	0.1803	0.4937	0.9704	4
P62897	Cycs	-0.3955	-0.7108	-0.4521	-0.7253	-0.3955	-0.7108	-0.4521	-0.7253	2
P62900	Rpl31	0.0593	0.45	-0.2961	0.3672	0.0593	0.45	-0.2961	0.3672	1
P62908	Rps3	-0.3307	-0.3711	-0.2757	0.1071	-0.3307	-0.3711	-0.2757	0.1071	3
P62911	Rpl32	0.3287	0.4818	-0.2667	0.4042	0.3287	0.4818	-0.2667	0.4042	1
P62918	Rpl8	0.1458	0.915	-0.0999	-0.0351	0.1458	0.915	-0.0999	-0.0351	1
P62960	Ybx1	0.0404	0.221	-2.7848	-1.249	0.0404	0.221	-2.7848	-1.249	2
P62962	Pfn1	1.2233	0.7136	0.4713	-0.0558	1.2233	0.7136	0.4713	-0.0558	1
P62983	Rps27a	2.3162	1.0204	2.3058	1.3437	2.3162	1.0204	2.3058	1.3437	1
P62996	Tra2b	-0.0833	0.3032	2.5157	0.5529	-0.0833	0.3032	2.5157	0.5529	4
P63001	Rac1	-0.9859	-1.802	-1.3137	-2.0207	-0.9859	-1.802	-1.3137	-2.0207	2
P63005	Pafah1b1	0.2885	0.3506	-0.7136	0.4941	0.2885	0.3506	-0.7136	0.4941	1
P63017	Hspa8	0.9259	0.4983	-0.9432	-1.5543	0.9259	0.4983	-0.9432	-1.5543	2
P63028	Tpt1	-0.3946	-1.2756	0.5206	-2.5442	-0.3946	-1.2756	0.5206	-2.5442	2
P63030	Mpc1	-0.3022	0.3619	-0.8853	-0.3814	-0.3022	0.3619	-0.8853	-0.3814	2
P63037	Dnaja1	0.2882	0.8161	0.2873	-0.1731	0.2882	0.8161	0.2873	-0.1731	1
P63038	Hspd1	0.1205	0.2535	-1.612	-1.7214	0.1205	0.2535	-1.612	-1.7214	2
P63073	Eif4e	-0.0387	-0.0777	-0.9118	-1.6255	-0.0387	-0.0777	-0.9118	-1.6255	2
P63085	Mapk1	1.1017	1.5534	-1.1955	-0.0863	1.1017	1.5534	-1.1955	-0.0863	1
P63101	Ywhaz	-0.208	-0.4098	1.3737	-0.8968	-0.208	-0.4098	1.3737	-0.8968	3
P63158	Hmgb1	1.0564	0.9927	-1.1245	-0.8874	1.0564	0.9927	-1.1245	-0.8874	1
P63242	Eif5a	0.3222	0.6047	-0.5031	-0.1914	0.3222	0.6047	-0.5031	-0.1914	1
P63260	Actg1	-0.1515	0.2157	0.5326	-0.0316	-0.1515	0.2157	0.5326	-0.0316	3
P63276	Rps17	0.1801	-0.331	-0.8285	-0.3437	0.1801	-0.331	-0.8285	-0.3437	2
P63321	Rala	-0.7488	-1.1607	0.9431	0.1678	-0.7488	-1.1607	0.9431	0.1678	3
P63323	Rps12	1.2929	-0.3609	-1.1898	-0.5435	1.2929	-0.3609	-1.1898	-0.5435	2
P63325	Rps10	0.7413	0.5436	-1.6817	-0.1303	0.7413	0.5436	-1.6817	-0.1303	1
P63328	Ppp3ca	-1.5519	-0.3199	0.6566	0.3528	-1.5519	-0.3199	0.6566	0.3528	3
P63330	Ppp2ca	0.4441	0.6064	0.9983	0.05	0.4441	0.6064	0.9983	0.05	1
P67778	Phb	-0.5363	-0.1838	0.7756	0.1082	-0.5363	-0.1838	0.7756	0.1082	3
P67871	Csnk2b	0.2138	-0.1275	1.5272	0.8929	0.2138	-0.1275	1.5272	0.8929	4
P67984	Rpl22	0.2897	0.3424	-0.351	0.4343	0.2897	0.3424	-0.351	0.4343	1
P68033	Actc1	0.8783	0.1178	-0.036	-1.2575	0.8783	0.1178	-0.036	-1.2575	2
P68037	Ube2l3	-0.4504	-2.9678	-0.2611	0.1915	-0.4504	-2.9678	-0.2611	0.1915	3
P68040	Rack1	-0.1622	-0.348	-0.5023	0.6188	-0.1622	-0.348	-0.5023	0.6188	3
P68254	Ywhaq	0.2088	0.2314	0.8199	0.3794	0.2088	0.2314	0.8199	0.3794	1
P68368	Tuba4a	-0.3363	-1.2859	-0.0578	-1.6327	-0.3363	-1.2859	-0.0578	-1.6327	2
P68372	Tubb4b	-0.0475	-0.1092	-1.0402	-1.8941	-0.0475	-0.1092	-1.0402	-1.8941	2
P68373	Tuba1c	-1.1535	-0.8872	0.2643	-1.3311	-1.1535	-0.8872	0.2643	-1.3311	3
P68433	Hist1h3i	-1.2537	-1.2017	0.1089	-0.3394	-1.2537	-1.2017	0.1089	-0.3394	3
P68510	Ywhah	-1.2085	-1.3352	1.2487	0.7007	-1.2085	-1.3352	1.2487	0.7007	3
P70122	Sbds	0.4384	0.5866	-1.3682	-0.2351	0.4384	0.5866	-1.3682	-0.2351	1
P70158	Smpdl3a	-1.031	-0.139	2.4115	5.454	-1.031	-0.139	2.4115	5.454	4
P70168	Kpnb1	-0.7595	0.8151	-0.5711	-0.4446	-0.7595	0.8151	-0.5711	-0.4446	1
P70170	Abcc9	0.6169	-0.5016	0.6138	0.998	0.6169	-0.5016	0.6138	0.998	4
P70194	Clec4f	0.1224	-1.0474	0.0357	0.857	0.1224	-1.0474	0.0357	0.857	3
P70195	Psmb7	0.7759	1.0233	-1.039	0.0099	0.7759	1.0233	-1.039	0.0099	1
P70227	Itpr3	-0.3591	0.4951	-0.0135	0.7734	-0.3591	0.4951	-0.0135	0.7734	1
P70245	Ebp	-0.101	-0.0439	-1.1885	0.4334	-0.101	-0.0439	-1.1885	0.4334	2
P70266	Pfkfb1	0.1192	0.7113	-0.1749	-0.4623	0.1192	0.7113	-0.1749	-0.4623	1
P70274	Selenop	4.0973	1.4908	-0.6953	1.0436	4.0973	1.4908	-0.6953	1.0436	1
P70280	Vamp7	2.1898	1.686	2.311	2.8433	2.1898	1.686	2.311	2.8433	1
P70290	Mpp1	0.2257	1.0543	-3.6443	-0.414	0.2257	1.0543	-3.6443	-0.414	2
P70295	Aup1	-0.2954	-1.4419	0.7906	1.2186	-0.2954	-1.4419	0.7906	1.2186	4
P70296	Pebp1	1.2277	0.5314	-1.6045	-0.6142	1.2277	0.5314	-1.6045	-0.6142	1
P70297	Stam	2.6602	0.4492	-0.3707	0.4137	2.6602	0.4492	-0.3707	0.4137	1
P70302	Stim1	-0.722	-0.8829	0.1053	1.0326	-0.722	-0.8829	0.1053	1.0326	4
P70318	Tial1	1.4909	0.3815	0.7778	-0.7879	1.4909	0.3815	0.7778	-0.7879	1
P70335	Rock1	0.0831	0.474	1.5475	-1.4504	0.0831	0.474	1.5475	-1.4504	1
P70336	Rock2	-0.0727	0.7877	-0.4011	-0.04	-0.0727	0.7877	-0.4011	-0.04	1
P70349	Hint1	-0.0005	0.2187	-2.241	-2.9451	-0.0005	0.2187	-2.241	-2.9451	2
P70372	Elavl1	-0.9491	-0.1907	-0.4091	-1.0999	-0.9491	-0.1907	-0.4091	-1.0999	2
P70387	Hfe	0.6552	0.2042	0.5128	0.2109	0.6552	0.2042	0.5128	0.2109	1
P70389	Igfals	1.0603	0.9641	0.9212	0.4693	1.0603	0.9641	0.9212	0.4693	1
P70398	Usp9x	0.4415	0.0358	-0.494	0.16	0.4415	0.0358	-0.494	0.16	1
P70404	Idh3g	-0.8174	-0.573	-1.0298	-0.4825	-0.8174	-0.573	-1.0298	-0.4825	2
P70441	Slc9a3r1	0.5722	0.2798	-1.4643	-2.0734	0.5722	0.2798	-1.4643	-2.0734	2
P70452	Stx4	-3.1475	-1.2709	0.3485	1.0003	-3.1475	-1.2709	0.3485	1.0003	3
P70665	Siae	-0.8172	-1.1889	1.9653	3.6932	-0.8172	-1.1889	1.9653	3.6932	4
P70670	Naca	0.0778	-0.0113	-1.4735	-1.0867	0.0778	-0.0113	-1.4735	-1.0867	2
P70694	Akr1c6	0.565	1.0954	-1.8115	-3.4205	0.565	1.0954	-1.8115	-3.4205	2
P70697	Urod	1.7865	-0.084	-0.4132	-0.1643	1.7865	-0.084	-0.4132	-0.1643	1
P70699	Gaa	-0.8333	-0.8848	2.125	3.7134	-0.8333	-0.8848	2.125	3.7134	4
P70704	Atp8a1	0.1304	-0.3064	0.7504	1.6188	0.1304	-0.3064	0.7504	1.6188	4
P80313	Cct7	0.9417	0.5843	1.4388	-0.1342	0.9417	0.5843	1.4388	-0.1342	1
P80314	Cct2	0.5533	0.2031	1.1413	-0.2879	0.5533	0.2031	1.1413	-0.2879	1
P80315	Cct4	0.8735	1.2876	1.1961	-0.0052	0.8735	1.2876	1.1961	-0.0052	1
P80316	Cct5	0.8994	0.6758	0.662	-0.3946	0.8994	0.6758	0.662	-0.3946	1
P80317	Cct6a	1.052	1.0772	1.1571	-1.0909	1.052	1.0772	1.1571	-1.0909	1
P80318	Cct3	0.6638	0.5136	2.672	0.2036	0.6638	0.5136	2.672	0.2036	4
P83093	Stim2	-2.2312	0.0682	0.3609	0.6313	-2.2312	0.0682	0.3609	0.6313	3
P83940	Eloc	2.1591	0.2789	-2.4871	-2.4982	2.1591	0.2789	-2.4871	-2.4982	2
P84084	Arf5	0.5348	0.8217	3.3224	0.7694	0.5348	0.8217	3.3224	0.7694	4
P84091	Ap2m1	-0.8099	-0.4261	-1.0262	-0.0706	-0.8099	-0.4261	-1.0262	-0.0706	2
P84096	Rhog	-1.4982	-0.8402	-0.7677	-1.6404	-1.4982	-0.8402	-0.7677	-1.6404	2
P84099	Rpl19	0.1997	0.8804	-0.0319	0.265	0.1997	0.8804	-0.0319	0.265	1
P84228	Hist2h3c2	-1.166	-1.2978	0.2334	-0.2883	-1.166	-1.2978	0.2334	-0.2883	3
P84244	H3f3b	-1.2667	-1.2146	0.0662	-0.3765	-1.2667	-1.2146	0.0662	-0.3765	3
P85094	Isoc2a	0.3953	-0.1828	0.0149	-0.8073	0.3953	-0.1828	0.0149	-0.8073	2
P97290	Serping1	2.5566	1.2556	0.7467	1.6441	2.5566	1.2556	0.7467	1.6441	1
P97298	Serpinf1	-0.4311	0.1141	-0.0918	-0.9557	-0.4311	0.1141	-0.0918	-0.9557	2
P97300	Nptn	-0.7554	-0.9218	-0.0712	1.1967	-0.7554	-0.9218	-0.0712	1.1967	4
P97315	Csrp1	-0.132	-2.183	-0.6357	1.4785	-0.132	-2.183	-0.6357	1.4785	3
P97325	St3gal3	0.564	0.8374	1.057	1	0.564	0.8374	1.057	1	1
P97328	Khk	0.3198	-0.4112	0.7063	-1.3441	0.3198	-0.4112	0.7063	-1.3441	2
P97333	Nrp1	-0.0241	0.3542	-0.244	1.6902	-0.0241	0.3542	-0.244	1.6902	4
P97348	Rhod	-0.0038	-1.584	1.1212	-0.2011	-0.0038	-1.584	1.1212	-0.2011	3
P97351	Rps3a	0.3766	-0.4617	-0.9046	-0.1548	0.3766	-0.4617	-0.9046	-0.1548	2
P97363	Sptlc2	-0.5437	-0.8224	0.2838	0.6012	-0.5437	-0.8224	0.2838	0.6012	3
P97364	Sephs2	1.8955	1.0847	-1.8539	-2.0431	1.8955	1.0847	-1.8539	-2.0431	2
P97370	Atp1b3	-2.583	-1.633	0.4128	0.0521	-2.583	-1.633	0.4128	0.0521	3
P97371	Psme1	-0.8041	-1.612	0.1521	-1.3967	-0.8041	-1.612	0.1521	-1.3967	3
P97372	Psme2	-1.1326	-2.301	-0.0092	-0.6284	-1.1326	-2.301	-0.0092	-0.6284	3
P97379	G3bp2	-1.3602	-0.5392	2.6105	-1.3325	-1.3602	-0.5392	2.6105	-1.3325	3
P97384	Anxa11	-0.8467	-1.7388	-0.2945	-1.7588	-0.8467	-1.7388	-0.2945	-1.7588	2
P97390	Vps45	0.7245	-0.6059	-0.8139	-0.8905	0.7245	-0.6059	-0.8139	-0.8905	2
P97429	Anxa4	-1.3264	-1.5307	0.4525	-0.7275	-1.3264	-1.5307	0.4525	-0.7275	3
P97432	Nbr1	3.2583	2.0072	-0.8945	-0.8115	3.2583	2.0072	-0.8945	-0.8115	1
P97449	Anpep	-2.0652	-1.2298	-1.5166	-0.1809	-2.0652	-1.2298	-1.5166	-0.1809	2
P97450	Atp5pf	-0.1972	0.1254	-0.9243	-1.2902	-0.1972	0.1254	-0.9243	-1.2902	2
P97461	Rps5	1.2015	-0.4985	0.061	0.9063	1.2015	-0.4985	0.061	0.9063	1
P97478	Coq7	-0.0253	0.0335	1.1035	0.5443	-0.0253	0.0335	1.1035	0.5443	4
P97494	Gclc	0.3406	0.7587	-0.0027	-2.1192	0.3406	0.7587	-0.0027	-2.1192	2
P97501	Fmo3	0.3472	1.2397	-0.5368	0.289	0.3472	1.2397	-0.5368	0.289	1
P97742	Cpt1a	-1.8179	-0.3568	1.5709	1.8239	-1.8179	-0.3568	1.5709	1.8239	4
P97765	Wbp2	-0.2308	0.9333	-2.8451	-0.2641	-0.2308	0.9333	-2.8451	-0.2641	2
P97785	Gfra1	1.1135	1.3423	-0.0881	-0.1535	1.1135	1.3423	-0.0881	-0.1535	1
P97792	Cxadr	0.8262	1.6542	2.8633	-0.7505	0.8262	1.6542	2.8633	-0.7505	1
P97797	Sirpa	-0.9972	-0.7129	0.6079	1.5187	-0.9972	-0.7129	0.6079	1.5187	4
P97798	Neo1	-1.2779	-1.1051	0.4889	-0.8614	-1.2779	-1.1051	0.4889	-0.8614	3
P97807	Fh	0.521	-0.0713	-1.2705	-1.3397	0.521	-0.0713	-1.2705	-1.3397	2
P97819	Pla2g6	0.7473	-0.5138	0.1478	0.5338	0.7473	-0.5138	0.1478	0.5338	1
P97821	Ctsc	-0.963	-1.5346	3.259	2.9038	-0.963	-1.5346	3.259	2.9038	4
P97823	Lypla1	0.6142	0.1902	-0.5646	-0.7177	0.6142	0.1902	-0.5646	-0.7177	1
P97855	G3bp1	0.5122	0.0272	1.4194	-0.9472	0.5122	0.0272	1.4194	-0.9472	1
P97858	Slc35b1	0.644	0.8277	1.3483	2.8827	0.644	0.8277	1.3483	2.8827	4
P97865	Pex7	0.7858	0.2842	1.6754	2.5705	0.7858	0.2842	1.6754	2.5705	4
P97872	Fmo5	-0.3618	0.712	0.4996	0.5091	-0.3618	0.712	0.4996	0.5091	4
P98064	Masp1	-1.3912	-0.4331	-0.1788	-0.8115	-1.3912	-0.4331	-0.1788	-0.8115	3
P98078	Dab2	-1.407	1.5006	-1.0654	-1.1848	-1.407	1.5006	-1.0654	-1.1848	2
P98192	Gnpat	-0.3229	0.1552	1.486	1.8764	-0.3229	0.1552	1.486	1.8764	4
P98203	Arvcf	0.0808	0.1386	-1.813	-1.5031	0.0808	0.1386	-1.813	-1.5031	2
P99024	Tubb5	-1.1424	0.4489	-1.3264	0.1737	-1.1424	0.4489	-1.3264	0.1737	2
P99025	Gchfr	1.2893	0.3448	-0.08	2.1771	1.2893	0.3448	-0.08	2.1771	1
P99026	Psmb4	-0.2921	-0.5294	0.1704	-2.1873	-0.2921	-0.5294	0.1704	-2.1873	2
P99027	Rplp2	0.9568	0.8188	-0.8649	-0.8445	0.9568	0.8188	-0.8649	-0.8445	1
P99028	Uqcrh	-0.454	-0.0277	-0.1362	-1.1429	-0.454	-0.0277	-0.1362	-1.1429	2
P99029	Prdx5	1.1716	0.1678	-1.995	-1.9694	1.1716	0.1678	-1.995	-1.9694	2
Q00519	Xdh	-1.3985	0.6286	1.0951	-0.349	-1.3985	0.6286	1.0951	-0.349	3
Q00560	Il6st	0.3134	0.6158	-0.479	-0.0785	0.3134	0.6158	-0.479	-0.0785	1
Q00612	G6pdx	-4.0703	-1.3469	1.0412	1.4676	-4.0703	-1.3469	1.0412	1.4676	3
Q00623	Apoa1	0.0899	-0.3564	-0.5737	-0.0921	0.0899	-0.3564	-0.5737	-0.0921	2
Q00724	Rbp4	1.4552	1.8297	-0.2764	1.5102	1.4552	1.8297	-0.2764	1.5102	1
Q00896	Serpina1c	1.7778	1.3566	0.3302	0.8243	1.7778	1.3566	0.3302	0.8243	1
Q00897	Serpina1d	0.8708	1.0509	-0.1268	0.5081	0.8708	1.0509	-0.1268	0.5081	1
Q00898	Serpina1e	1.0745	0.1243	1.2916	0.3705	1.0745	0.1243	1.2916	0.3705	1
Q00915	Rbp1	0.1344	0.5823	-0.938	-1.1944	0.1344	0.5823	-0.938	-1.1944	2
Q00977	Gjb2	0.5302	0.2968	0.5959	1.6226	0.5302	0.2968	0.5959	1.6226	1
Q00993	Axl	-0.8745	0.482	-0.9844	-0.0641	-0.8745	0.482	-0.9844	-0.0641	2
Q00PI9	Hnrnpul2	-1.4453	0.3362	0.3543	-0.8002	-1.4453	0.3362	0.3543	-0.8002	3
Q01149	Col1a2	0.6073	0.6514	-0.3939	-0.4248	0.6073	0.6514	-0.3939	-0.4248	1
Q01237	Hmgcr	-1.0584	-0.2704	-0.5917	-0.3215	-1.0584	-0.2704	-0.5917	-0.3215	2
Q01279	Egfr	1.0312	0.857	1.1123	0.2525	1.0312	0.857	1.1123	0.2525	1
Q01339	Apoh	-0.0725	-0.5134	-1.4651	-0.6309	-0.0725	-0.5134	-1.4651	-0.6309	2
Q01405	Sec23a	-0.0146	0.2004	0.5234	1.0513	-0.0146	0.2004	0.5234	1.0513	4
Q01730	Rsu1	0.7699	0.5697	-0.2454	-0.3335	0.7699	0.5697	-0.2454	-0.3335	1
Q01853	Vcp	0.8273	0.0056	0.7043	-0.2162	0.8273	0.0056	0.7043	-0.2162	1
Q02013	Aqp1	-1.2295	0.0523	-1.1945	1.0361	-1.2295	0.0523	-1.1945	1.0361	1
Q02053	Uba1	0.0357	-0.1473	0.4532	-2.1626	0.0357	-0.1473	0.4532	-2.1626	2
Q02105	C1qc	1.0342	-0.0577	0.6809	-0.0274	1.0342	-0.0577	0.6809	-0.0274	1
Q02248	Ctnnb1	-1.1267	-1.1236	-0.5573	-1.8742	-1.1267	-1.1236	-0.5573	-1.8742	2
Q02257	Jup	-1.124	-0.5655	-0.5362	-1.9325	-1.124	-0.5655	-0.5362	-1.9325	2
Q02357	Ank1	0.0918	0.7869	-2.2195	-0.7905	0.0918	0.7869	-2.2195	-0.7905	2
Q02819	Nucb1	1.0119	0.85	-0.723	0.2532	1.0119	0.85	-0.723	0.2532	1
Q03145	Epha2	-0.071	-0.5436	1.1361	-0.0403	-0.071	-0.5436	1.1361	-0.0403	3
Q03160	Grb7	1.0525	0.746	1.0276	1.0086	1.0525	0.746	1.0276	1.0086	1
Q03265	Atp5f1a	0.2667	0.0814	-1.3277	-1.372	0.2667	0.0814	-1.3277	-1.372	2
Q03311	Bche	0.779	0.4313	0.3472	1.0257	0.779	0.4313	0.3472	1.0257	1
Q03734	Serpina3m	1.25	2.4307	1.0766	1.8579	1.25	2.4307	1.0766	1.8579	1
Q03963	Eif2ak2	-0.6972	-1.0211	-2.1226	-0.2133	-0.6972	-1.0211	-2.1226	-0.2133	2
Q04447	Ckb	1.7133	-1.7357	-1.2081	-1.2684	1.7133	-1.7357	-1.2081	-1.2684	2
Q04519	Smpd1	-0.7828	-0.2347	2.6673	4.3085	-0.7828	-0.2347	2.6673	4.3085	4
Q04736	Yes1	-0.6228	-0.7113	0.3502	0.1789	-0.6228	-0.7113	0.3502	0.1789	3
Q04857	Col6a1	-0.307	-0.3038	-0.7338	-0.8962	-0.307	-0.3038	-0.7338	-0.8962	2
Q05117	Acp5	0.7479	0.1751	1.4573	4.1039	0.7479	0.1751	1.4573	4.1039	4
Q05144	Rac2	-0.9844	-1.2849	-0.4696	-0.1217	-0.9844	-1.2849	-0.4696	-0.1217	3
Q05186	Rcn1	-0.5102	-0.6158	-0.6144	-1.4367	-0.5102	-0.6158	-0.6144	-1.4367	2
Q05421	Cyp2e1	0.5	1.3307	0.1741	1.3112	0.5	1.3307	0.1741	1.3112	1
Q05793	Hspg2	-0.2943	-1.1945	0.6272	-0.7886	-0.2943	-1.1945	0.6272	-0.7886	3
Q05816	Fabp5	0.4019	-1.3225	1.2921	-0.2571	0.4019	-1.3225	1.2921	-0.2571	3
Q05915	Gch1	0.2545	-0.432	-2.0172	-2.1105	0.2545	-0.432	-2.0172	-2.1105	2
Q05920	Pc	-0.3668	-0.1047	0.2766	-0.1272	-0.3668	-0.1047	0.2766	-0.1272	3
Q05D44	Eif5b	-2.0904	-0.1632	-0.5857	0.1728	-2.0904	-0.1632	-0.5857	0.1728	2
Q06138	Cab39	0.2011	0.7183	0.8331	0.268	0.2011	0.7183	0.8331	0.268	1
Q06185	Atp5me	-0.5492	-0.6589	0.4054	0.4073	-0.5492	-0.6589	0.4054	0.4073	3
Q06335	Aplp2	2.9402	1.3803	0.5254	0.2072	2.9402	1.3803	0.5254	0.2072	1
Q06770	Serpina6	-0.4086	-3.0305	-2.1349	-0.8301	-0.4086	-3.0305	-2.1349	-0.8301	2
Q06890	Clu	2.5613	1.3899	0.1833	-0.0698	2.5613	1.3899	0.1833	-0.0698	1
Q07076	Anxa7	-0.3421	-2.4693	2.7681	0.1727	-0.3421	-2.4693	2.7681	0.1727	3
Q07113	Igf2r	0.1747	0.4507	0.7492	0.0468	0.1747	0.4507	0.7492	0.0468	1
Q07417	Acads	0.1489	-0.3983	-0.0933	-0.4213	0.1489	-0.3983	-0.0933	-0.4213	2
Q07456	Ambp	0.8496	0.5103	-0.41	0.9794	0.8496	0.5103	-0.41	0.9794	1
Q07797	Lgals3bp	-1.8796	-2.189	2.6401	2.8075	-1.8796	-2.189	2.6401	2.8075	4
Q07813	Bax	-0.8677	0.3289	1.9194	1.7853	-0.8677	0.3289	1.9194	1.7853	4
Q07968	F13b	0.2855	-2.3786	-1.4192	-1.6538	0.2855	-2.3786	-1.4192	-1.6538	2
Q08481	Pecam1	-0.2428	-0.8172	-0.3822	1.0378	-0.2428	-0.8172	-0.3822	1.0378	3
Q08501	Prlr	3.7005	3.066	0.3179	1.4264	3.7005	3.066	0.3179	1.4264	1
Q08761	Pros1	0.4755	-0.935	-0.5922	-0.6595	0.4755	-0.935	-0.5922	-0.6595	2
Q08857	Cd36	-1.8569	-1.3764	0.0118	-0.447	-1.8569	-1.3764	0.0118	-0.447	3
Q08879	Fbln1	3.508	1.4702	-0.6668	-1.9039	3.508	1.4702	-0.6668	-1.9039	1
Q09200	B4galnt1	-0.623	-0.2188	0.0969	0.6532	-0.623	-0.2188	0.0969	0.6532	4
Q0GNC1	Inf2	-0.7254	-0.0969	2.2969	0.7365	-0.7254	-0.0969	2.2969	0.7365	4
Q11011	Npepps	0.0365	0.504	0.5124	-0.2933	0.0365	0.504	0.5124	-0.2933	1
Q11136	Pepd	-0.0315	-0.8319	-1.225	-0.2662	-0.0315	-0.8319	-1.225	-0.2662	2
Q14C51	Ptcd3	-0.8017	-0.6552	0.3256	0.0151	-0.8017	-0.6552	0.3256	0.0151	3
Q14CH1	Mocos	-1.1072	-0.8486	-0.7896	-0.9938	-1.1072	-0.8486	-0.7896	-0.9938	2
Q14CH7	Aars2	-0.2844	-0.4513	-0.8998	-0.8037	-0.2844	-0.4513	-0.8998	-0.8037	2
Q14DH7	Acss3	0.0524	-0.2907	0.1587	-0.1524	0.0524	-0.2907	0.1587	-0.1524	3
Q19LI2	A1bg	-1.1101	0.6059	-0.6632	-0.8519	-1.1101	0.6059	-0.6632	-0.8519	2
Q283N4	Urad	0.7124	0.032	0.2373	0.3777	0.7124	0.032	0.2373	0.3777	1
Q2EMV9	Parp14	-0.0571	-0.9754	-0.2276	0.556	-0.0571	-0.9754	-0.2276	0.556	3
Q2HXL6	Edem3	0.0906	-0.2803	1.4423	-0.1008	0.0906	-0.2803	1.4423	-0.1008	3
Q2NL51	Gsk3a	-0.415	0.2696	0.0894	-0.5511	-0.415	0.2696	0.0894	-0.5511	2
Q2TBE6	Pi4k2a	2.2175	2.2276	1.3052	2.3476	2.2175	2.2276	1.3052	2.3476	1
Q2TPA8	Hsdl2	1.2706	0.6057	-1.4679	-1.6332	1.2706	0.6057	-1.4679	-1.6332	2
Q2VLH6	Cd163	-0.4958	1.9009	0.2643	0.1305	-0.4958	1.9009	0.2643	0.1305	4
Q31125	Slc39a7	-1.0766	-0.7421	-1.0946	1.2938	-1.0766	-0.7421	-1.0946	1.2938	3
Q32Q92	Acot6	-0.262	0.6543	-0.0716	-0.0807	-0.262	0.6543	-0.0716	-0.0807	1
Q3B7Z2	Osbp	1.3297	1.0597	0.5205	0.0954	1.3297	1.0597	0.5205	0.0954	1
Q3KNM2	March5	-1.3471	-0.9327	1.9263	1.2284	-1.3471	-0.9327	1.9263	1.2284	3
Q3SXB8	Colec11	0.0408	-1	-0.2652	-1.0672	0.0408	-1	-0.2652	-1.0672	2
Q3T9X0	Slc2a9	-1.2477	-0.0693	-0.261	-0.7106	-1.2477	-0.0693	-0.261	-0.7106	3
Q3TA59	Jmjd8	0.5941	1.5035	-0.2259	0.8008	0.5941	1.5035	-0.2259	0.8008	1
Q3TBW2	Mrpl10	-0.2247	-1.2003	-0.0459	1.2866	-0.2247	-1.2003	-0.0459	1.2866	3
Q3TC33	Ccdc127	-1.187	-0.3229	0.4951	-0.7143	-1.187	-0.3229	0.4951	-0.7143	3
Q3TC72	Fahd2	0.1212	-0.064	-0.3163	-0.5483	0.1212	-0.064	-0.3163	-0.5483	2
Q3TCH7	Cul4a	-0.4569	-1.6574	0.3183	0.2225	-0.4569	-1.6574	0.3183	0.2225	3
Q3TCJ1	Abraxas2	-0.4531	-1.9474	0.4177	-1.5624	-0.4531	-1.9474	0.4177	-1.5624	3
Q3TCN2	Plbd2	-0.9909	-0.8332	2.8318	3.0197	-0.9909	-0.8332	2.8318	3.0197	4
Q3TDD9	Ppp1r21	-0.9273	0.2804	-0.1081	-1.0189	-0.9273	0.2804	-0.1081	-1.0189	2
Q3TDN2	Faf2	-0.8664	0.1558	-0.1514	-0.149	-0.8664	0.1558	-0.1514	-0.149	3
Q3TDQ1	Stt3b	-0.073	0.2154	0.1009	0.907	-0.073	0.2154	0.1009	0.907	1
Q3TFQ1	Spryd7	0.1808	0.037	-0.858	0.228	0.1808	0.037	-0.858	0.228	1
Q3TH73	Ttyh2	-0.9709	0.0154	0.1436	1.1744	-0.9709	0.0154	0.1436	1.1744	4
Q3THE2	Myl12b	1.0065	0.3292	-0.3297	0.3801	1.0065	0.3292	-0.3297	0.3801	1
Q3THS6	Mat2a	0.6731	-0.0799	-0.5715	-2.7905	0.6731	-0.0799	-0.5715	-2.7905	2
Q3TJ91	Llgl2	0.0613	-0.1881	0.2099	0.8413	0.0613	-0.1881	0.2099	0.8413	4
Q3TJZ6	Fam98a	-1.0812	0.3843	1.5602	2.4875	-1.0812	0.3843	1.5602	2.4875	4
Q3TL26	Tfb2m	1.5942	-0.3176	0.4494	0.4707	1.5942	-0.3176	0.4494	0.4707	1
Q3TL44	Nlrx1	-0.2575	-0.8687	0.6616	0.2028	-0.2575	-0.8687	0.6616	0.2028	3
Q3TLP5	Echdc2	0.3234	-0.2486	-0.4023	-0.5001	0.3234	-0.2486	-0.4023	-0.5001	2
Q3TMX7	Qsox2	-0.4724	-1.6736	1.1691	1.7005	-0.4724	-1.6736	1.1691	1.7005	4
Q3TNA1	Xylb	1.5466	-0.203	0.4279	-0.1414	1.5466	-0.203	0.4279	-0.1414	1
Q3TPX4	Exoc5	-2.2289	0.747	1.1648	-0.0915	-2.2289	0.747	1.1648	-0.0915	3
Q3TQB2	Foxred1	-0.7686	-1.4128	0.1869	0.8614	-0.7686	-1.4128	0.1869	0.8614	3
Q3TRM4	Pnpla6	0.7182	-0.1894	-0.2431	-0.3944	0.7182	-0.1894	-0.2431	-0.3944	2
Q3TRM8	Hk3	0.1604	-2.3719	1.4413	0.9319	0.1604	-2.3719	1.4413	0.9319	3
Q3TTY5	Krt2	-0.3929	-0.4616	0.2993	-0.1678	-0.3929	-0.4616	0.2993	-0.1678	3
Q3TWL2	Pip4p1	0.6275	0.303	1.0512	1.7515	0.6275	0.303	1.0512	1.7515	4
Q3TXS7	Psmd1	0.0336	-0.8458	0.2227	-1.8433	0.0336	-0.8458	0.2227	-1.8433	2
Q3TYD4	Arsg	0.8728	-0.2118	-2.3061	1.0605	0.8728	-0.2118	-2.3061	1.0605	1
Q3TYS2	Cybc1	0.5614	0.3511	0.965	0.8656	0.5614	0.3511	0.965	0.8656	1
Q3TZZ7	Esyt2	-0.8454	0.2834	0.4645	0.3053	-0.8454	0.2834	0.4645	0.3053	4
Q3U186	Rars2	-0.0642	1.0616	-1.0793	-0.7313	-0.0642	1.0616	-1.0793	-0.7313	2
Q3U1J4	Ddb1	0.3273	0.7365	0.8883	0.4954	0.3273	0.7365	0.8883	0.4954	1
Q3U1V6	Uevld	-0.3747	-0.426	-1.8473	-1.2686	-0.3747	-0.426	-1.8473	-1.2686	2
Q3U2A8	Vars2	2.1537	1.8442	0.5971	1.1843	2.1537	1.8442	0.5971	1.1843	1
Q3U2C5	Rnf149	1.932	1.9893	-0.4983	-0.572	1.932	1.9893	-0.4983	-0.572	1
Q3U2P1	Sec24a	0.0238	0.6164	0.4913	0.9778	0.0238	0.6164	0.4913	0.9778	1
Q3U3R4	Lmf1	0.1837	0.1748	0.1561	0.4937	0.1837	0.1748	0.1561	0.4937	1
Q3U4I7	Pyroxd2	-0.8439	-0.5157	-0.1672	0.0612	-0.8439	-0.5157	-0.1672	0.0612	3
Q3U5Q7	Cmpk2	-1.0876	-1.0371	0.4279	-0.6506	-1.0876	-1.0371	0.4279	-0.6506	3
Q3U7R1	Esyt1	-1.4469	-1.5322	1.2874	1.5609	-1.4469	-1.5322	1.2874	1.5609	3
Q3U9G9	Lbr	0.4613	0.9463	-0.9494	-1.9675	0.4613	0.9463	-0.9494	-1.9675	2
Q3U9N9	Slc16a10	-0.8792	-0.0415	-0.0393	-0.8317	-0.8792	-0.0415	-0.0393	-0.8317	3
Q3UBX0	Tmem109	-0.1311	-0.0456	0.1498	0.4198	-0.1311	-0.0456	0.1498	0.4198	3
Q3UDE2	Ttll12	0.1797	-0.4589	0.7685	-0.0289	0.1797	-0.4589	0.7685	-0.0289	3
Q3UDR8	Yipf3	0.2402	1.0108	0.4822	1.7738	0.2402	1.0108	0.4822	1.7738	1
Q3UDW8	Hgsnat	-0.4972	-0.5894	2.2705	2.1702	-0.4972	-0.5894	2.2705	2.1702	4
Q3UEG6	Agxt2	-0.0112	-0.5879	0.0549	-0.2607	-0.0112	-0.5879	0.0549	-0.2607	3
Q3UFF7	Lyplal1	0.68	0.1722	-0.8051	-0.662	0.68	0.1722	-0.8051	-0.662	1
Q3UFY8	Trmt10c	0.3845	-0.3015	0.0753	-1.082	0.3845	-0.3015	0.0753	-1.082	2
Q3UGP8	Alg10b	-0.172	0.469	-0.4175	1.9211	-0.172	0.469	-0.4175	1.9211	4
Q3UGR5	Hdhd2	0.9921	0.6208	-1.6544	-1.4827	0.9921	0.6208	-1.6544	-1.4827	2
Q3UHB1	Nt5dc3	-0.0759	-0.5206	0.9529	0.7923	-0.0759	-0.5206	0.9529	0.7923	4
Q3UHD6	Snx27	-0.4881	-0.4079	-0.5434	0.1047	-0.4881	-0.4079	-0.5434	0.1047	3
Q3UHG7	Lchn	0.8246	0.9772	-0.3665	-1.0514	0.8246	0.9772	-0.3665	-1.0514	1
Q3UHH2	Slc22a23	-0.26	1.2013	0.2926	-0.0013	-0.26	1.2013	0.2926	-0.0013	4
Q3UHJ0	Aak1	0.238	0.8891	-1.1685	-1.0943	0.238	0.8891	-1.1685	-1.0943	2
Q3UHN9	Ndst1	0.0082	0.0332	0.5738	1.2626	0.0082	0.0332	0.5738	1.2626	4
Q3UIR3	Dtx3l	-0.4597	-1.3646	-1.8348	0.5371	-0.4597	-1.3646	-1.8348	0.5371	2
Q3UIU2	Ndufb6	-1.0517	0.3376	0.4052	0.4731	-1.0517	0.3376	0.4052	0.4731	4
Q3UJD6	Usp19	0.6984	1.1784	-1.652	0.4655	0.6984	1.1784	-1.652	0.4655	1
Q3UJU9	Rmdn3	-0.5013	0.5122	-2.8223	-1.5286	-0.5013	0.5122	-2.8223	-1.5286	2
Q3ULD5	Mccc2	0.3928	0.0466	-0.6352	-1.1587	0.3928	0.0466	-0.6352	-1.1587	2
Q3ULF4	Spg7	0.6079	-1.9841	-0.549	-0.4465	0.6079	-1.9841	-0.549	-0.4465	3
Q3ULJ0	Gpd1l	-1.0241	-0.3784	0.6391	1.2471	-1.0241	-0.3784	0.6391	1.2471	4
Q3UM29	Cog7	0.585	-0.3285	-0.8254	0.0725	0.585	-0.3285	-0.8254	0.0725	2
Q3UM45	Ppp1r7	-0.2196	-0.5069	-1.72	-1.5879	-0.2196	-0.5069	-1.72	-1.5879	2
Q3UMB9	Washc4	-0.4481	-0.249	0.985	1.3887	-0.4481	-0.249	0.985	1.3887	4
Q3UMF0	Cobll1	0.9173	0.2038	-0.0173	-0.1903	0.9173	0.2038	-0.0173	-0.1903	1
Q3UMR5	Mcu	0.7628	-0.3943	1.1879	-0.1764	0.7628	-0.3943	1.1879	-0.1764	4
Q3UMW8	Cln5	-0.8617	-1.1124	3.1406	3.0416	-0.8617	-1.1124	3.1406	3.0416	4
Q3UN02	Lclat1	0.1453	0.2225	0.2499	0.6082	0.1453	0.2225	0.2499	0.6082	1
Q3UN04	Usp30	-1.145	1.224	0.5855	-1.1386	-1.145	1.224	0.5855	-1.1386	3
Q3UNX5	Acsm3	-0.2418	-0.5077	0.7941	0.7076	-0.2418	-0.5077	0.7941	0.7076	4
Q3UNZ8	Cryzl2	0.286	-0.1309	-0.6358	-0.9172	0.286	-0.1309	-0.6358	-0.9172	2
Q3UP75	Ugt3a1	-0.3044	0.8305	-0.0208	0.7357	-0.3044	0.8305	-0.0208	0.7357	1
Q3UP87	Elane	-0.8214	-1.495	-0.4204	1.6834	-0.8214	-1.495	-0.4204	1.6834	3
Q3UPF5	Zc3hav1	-0.287	-1.5494	0.0969	0.5479	-0.287	-1.5494	0.0969	0.5479	3
Q3UPH1	Prrc1	1.7363	-0.1545	0.6265	-1.0453	1.7363	-0.1545	0.6265	-1.0453	1
Q3UPL0	Sec31a	0.2917	-0.5401	-0.5237	-1.0398	0.2917	-0.5401	-0.5237	-1.0398	2
Q3UQ44	Iqgap2	1.7577	0.6735	4.0662	1.957	1.7577	0.6735	4.0662	1.957	4
Q3UQ84	Tars2	-0.5129	-0.8468	0.5042	0.7212	-0.5129	-0.8468	0.5042	0.7212	3
Q3UQN2	Fcho2	-0.3813	0.6199	1.2528	-0.9889	-0.3813	0.6199	1.2528	-0.9889	1
Q3URD3	Slmap	0.5872	-0.1606	0.9002	0.3874	0.5872	-0.1606	0.9002	0.3874	4
Q3URE1	Acsf3	-0.277	-0.3044	-0.552	-0.6387	-0.277	-0.3044	-0.552	-0.6387	2
Q3URS9	Ccdc51	-0.8516	-0.1872	0.7601	0.4027	-0.8516	-0.1872	0.7601	0.4027	3
Q3USZ8	Dipk2a	0.0023	-0.243	0.4794	1.3232	0.0023	-0.243	0.4794	1.3232	4
Q3UUI3	Them4	0.9279	-0.0282	-0.5418	-1.06	0.9279	-0.0282	-0.5418	-1.06	2
Q3UUQ7	Pgap1	-0.2944	0.1858	-0.8349	-0.7027	-0.2944	0.1858	-0.8349	-0.7027	2
Q3UV17	Krt76	-1.1072	-0.106	0.6418	-0.4905	-1.1072	-0.106	0.6418	-0.4905	3
Q3UV70	Pdp1	-4.5688	-0.8704	-0.0696	-1.8112	-4.5688	-0.8704	-0.0696	-1.8112	2
Q3UVG3	Fam91a1	-1.5661	-0.0285	0.2833	-0.187	-1.5661	-0.0285	0.2833	-0.187	3
Q3UVK0	Ermp1	-0.7281	-0.3009	0.5831	1.665	-0.7281	-0.3009	0.5831	1.665	4
Q3UVL4	Vps51	-0.3735	-0.3831	-0.0486	-0.719	-0.3735	-0.3831	-0.0486	-0.719	3
Q3UW53	Fam129a	-1.8361	-2.8643	0.6639	0.6934	-1.8361	-2.8643	0.6639	0.6934	3
Q3UZ09	C1rl	-1.0359	-0.789	0.4342	1.1365	-1.0359	-0.789	0.4342	1.1365	4
Q3UZ39	Lrrfip1	-0.5996	-1.4706	-0.8803	-0.6894	-0.5996	-1.4706	-0.8803	-0.6894	2
Q3UZZ6	Sult1d1	1.0506	0.7619	-1.1976	-1.5633	1.0506	0.7619	-1.1976	-1.5633	2
Q3V009	Tmed1	0.3733	0.2475	0.4358	1.4958	0.3733	0.2475	0.4358	1.4958	1
Q3V0K9	Pls1	0.0348	0.8019	0.9365	0.2713	0.0348	0.8019	0.9365	0.2713	1
Q3V1T4	P3h1	-2.7857	-0.731	-0.4997	0.2195	-2.7857	-0.731	-0.4997	0.2195	2
Q3V384	Afg1l	-0.9084	-2.7806	0.0938	0.209	-0.9084	-2.7806	0.0938	0.209	3
Q3V3R1	Mthfd1l	-1.0971	-1.0552	0.2669	0.4081	-1.0971	-1.0552	0.2669	0.4081	3
Q3V3R4	Itga1	-0.5787	-1.1989	-2.2454	-2.3529	-0.5787	-1.1989	-2.2454	-2.3529	2
Q3V4B5	Commd6	1.0092	0.5464	-0.9322	0.9836	1.0092	0.5464	-0.9322	0.9836	1
Q499X9	Mars2	0.512	0.4796	1.1491	-0.4954	0.512	0.4796	1.1491	-0.4954	1
Q4KML4	Abracl	-0.5119	0.0256	0.4343	-0.5444	-0.5119	0.0256	0.4343	-0.5444	3
Q4LDG0	Slc27a5	0.1861	-0.0726	0.2274	1.0007	0.1861	-0.0726	0.2274	1.0007	4
Q4PJX1	Odr4	0.054	0.2475	0.572	1.5019	0.054	0.2475	0.572	1.5019	4
Q4PZA2	Ece1	3.829	1.2873	0.0051	1.0407	3.829	1.2873	0.0051	1.0407	1
Q4VAE3	Tmem65	-1.9936	-2.925	0.1244	-0.2769	-1.9936	-2.925	0.1244	-0.2769	3
Q4VBD2	Tapt1	0.0474	0.6834	-0.2162	0.4364	0.0474	0.6834	-0.2162	0.4364	1
Q501J6	Ddx17	1.8173	-1.3244	2.3036	-0.3177	1.8173	-1.3244	2.3036	-0.3177	4
Q505D7	Opa3	-0.2279	-0.1611	0.7419	0.3573	-0.2279	-0.1611	0.7419	0.3573	3
Q566J8	Coq8b	0.3796	0.3604	-0.1803	1.1369	0.3796	0.3604	-0.1803	1.1369	1
Q570Y9	Deptor	-0.2109	-1.247	-0.3455	-0.7366	-0.2109	-1.247	-0.3455	-0.7366	2
Q571E4	Galns	-1.9991	-0.6019	1.5667	2.2094	-1.9991	-0.6019	1.5667	2.2094	4
Q571F8	Gls2	0.1088	-0.3047	0.2341	0.271	0.1088	-0.3047	0.2341	0.271	3
Q571I9	Aldh16a1	0.6776	0.2342	-1.688	-2.7416	0.6776	0.2342	-1.688	-2.7416	2
Q58A65	Spag9	1.9641	1.5415	2.484	0.5881	1.9641	1.5415	2.484	0.5881	1
Q59J78	Ndufaf2	-0.798	0.563	-0.2642	-0.7921	-0.798	0.563	-0.2642	-0.7921	1
Q5BKQ4	Pnliprp1	-0.1802	-1.7745	0.8077	1.4876	-0.1802	-1.7745	0.8077	1.4876	4
Q5BL07	Pex1	0.2818	1.3142	-2.1949	-1.4991	0.2818	1.3142	-2.1949	-1.4991	2
Q5F285	Tmem256	-0.316	-0.2569	0.4836	0.2838	-0.316	-0.2569	0.4836	0.2838	3
Q5F2F2	Abhd15	-1.5499	-1.1135	1.395	0.2476	-1.5499	-1.1135	1.395	0.2476	3
Q5FW57	Gm4952	0.4758	-0.0073	-1.8808	-0.8671	0.4758	-0.0073	-1.8808	-0.8671	2
Q5FW60	Mup20	-0.9424	0.6888	1.6611	0.8082	-0.9424	0.6888	1.6611	0.8082	4
Q5FWI3	Cemip2	-0.112	-1.1541	2.1545	0.4818	-0.112	-1.1541	2.1545	0.4818	4
Q5H8C4	Vps13a	0.0576	-0.4386	-0.0996	-0.7958	0.0576	-0.4386	-0.0996	-0.7958	2
Q5HZI1	Mtus1	-2.1331	0.1266	-1.298	-0.0078	-2.1331	0.1266	-1.298	-0.0078	2
Q5HZI9	Slc25a51	-1.0336	0.4939	1.3259	-0.4635	-1.0336	0.4939	1.3259	-0.4635	1
Q5I012	Slc38a10	-0.1899	0.322	-0.9129	1.1597	-0.1899	0.322	-0.9129	1.1597	4
Q5I2A0	Serpina3g	1.95	0.4287	-0.1686	0.9459	1.95	0.4287	-0.1686	0.9459	1
Q5KU39	Vps41	-1.1419	-1.535	0.9104	-0.0538	-1.1419	-1.535	0.9104	-0.0538	3
Q5M8N4	Sdr39u1	-0.523	-1.4238	-1.0692	-0.0822	-0.523	-1.4238	-1.0692	-0.0822	3
Q5MJS3	Fam20c	0.1853	-0.6412	-0.1209	0.3615	0.1853	-0.6412	-0.1209	0.3615	2
Q5PT54	Slc10a5	-0.9332	0.5679	0.8343	2.3383	-0.9332	0.5679	0.8343	2.3383	4
Q5RKZ7	Mocs1	-0.2629	-0.5789	1.0674	0.3335	-0.2629	-0.5789	1.0674	0.3335	3
Q5SRY7	Fbxw11	-0.659	-1.1172	1.2994	1.9816	-0.659	-1.1172	1.2994	1.9816	4
Q5SS80	Dhrs13	-1.034	-1.0137	0.4429	-0.6045	-1.034	-1.0137	0.4429	-0.6045	3
Q5SSH8	Cyb5d2	-0.4651	0.7755	-0.8177	2.6642	-0.4651	0.7755	-0.8177	2.6642	4
Q5SSK3	Tefm	-1.0325	-0.0598	0.8997	0.6593	-1.0325	-0.0598	0.8997	0.6593	3
Q5SUA5	Myo1g	-0.482	-0.5377	1.2226	1.5686	-0.482	-0.5377	1.2226	1.5686	4
Q5SUC9	Sco1	-0.795	-0.7838	0.6762	0.2486	-0.795	-0.7838	0.6762	0.2486	3
Q5SVR0	Tbc1d9b	-0.6896	0.5499	0.8373	-0.1087	-0.6896	0.5499	0.8373	-0.1087	4
Q5SW19	Cluh	-0.1803	-1.7474	-0.394	-0.2372	-0.1803	-1.7474	-0.394	-0.2372	3
Q5SWT3	Slc25a35	-0.7545	-0.5374	0.8878	-0.9342	-0.7545	-0.5374	0.8878	-0.9342	3
Q5SWU9	Acaca	1.2026	0.6057	0.5479	-0.6497	1.2026	0.6057	0.5479	-0.6497	1
Q5SYD0	Myo1d	-1.094	0.0468	0.3425	1.7443	-1.094	0.0468	0.3425	1.7443	4
Q5SZA1	Slc17a2	0.3022	0.8411	0.9743	-0.3932	0.3022	0.8411	0.9743	-0.3932	1
Q5U419	Mfsd3	-0.2519	-0.3007	0.5633	1.0208	-0.2519	-0.3007	0.5633	1.0208	4
Q5U458	Dnajc11	-1.1845	-0.5842	0.9861	0.6779	-1.1845	-0.5842	0.9861	0.6779	3
Q5U462	Cdcp1	-0.4581	-1.2602	0.2327	-2.1495	-0.4581	-1.2602	0.2327	-2.1495	2
Q5U5V2	Hykk	-0.4229	0.0589	-0.3465	-2.0142	-0.4229	0.0589	-0.3465	-2.0142	2
Q5XG73	Acbd5	0.4225	1.2508	1.9567	1.5831	0.4225	1.2508	1.9567	1.5831	4
Q5XJY4	Parl	-0.0941	0.1757	0.7891	1.1746	-0.0941	0.1757	0.7891	1.1746	4
Q5XJY5	Arcn1	0.5346	-0.3459	-0.6571	-0.9536	0.5346	-0.3459	-0.6571	-0.9536	2
Q5XKN4	Jagn1	-0.0219	0.5202	0.7337	1.275	-0.0219	0.5202	0.7337	1.275	4
Q5YD48	A1cf	1.1447	0.2218	-0.6217	-0.5406	1.1447	0.2218	-0.6217	-0.5406	1
Q60590	Orm1	0.3905	0.6279	0.1407	0.8152	0.3905	0.6279	0.1407	0.8152	1
Q60597	Ogdh	-0.8853	-0.9648	-0.0194	-0.1406	-0.8853	-0.9648	-0.0194	-0.1406	3
Q60598	Cttn	1.5972	1.4252	1.1365	0.9236	1.5972	1.4252	1.1365	0.9236	1
Q60605	Myl6	0.7457	0.2463	-0.6165	-0.8384	0.7457	0.2463	-0.6165	-0.8384	1
Q60631	Grb2	1.1357	1.3392	-2.0512	0.5026	1.1357	1.3392	-2.0512	0.5026	1
Q60634	Flot2	-0.2011	-0.754	1.5679	0.3014	-0.2011	-0.754	1.5679	0.3014	3
Q60648	Gm2a	-1.2495	-0.7365	1.4073	2.6927	-1.2495	-0.7365	1.4073	2.6927	4
Q60649	Clpb	0.2752	-0.0804	-0.2206	-0.0325	0.2752	-0.0804	-0.2206	-0.0325	1
Q60668	Hnrnpd	0.1167	0.1813	-0.6518	-2.5828	0.1167	0.1813	-0.6518	-2.5828	2
Q60680	Chuk	-0.4581	0.8411	1.0831	-0.1423	-0.4581	0.8411	1.0831	-0.1423	3
Q60692	Psmb6	0.782	0.4101	-1.3208	-3.1195	0.782	0.4101	-1.3208	-3.1195	2
Q60710	Samhd1	-0.6877	-1.6725	1.0899	0.6999	-0.6877	-1.6725	1.0899	0.6999	3
Q60715	P4ha1	-1.9716	-1.0654	0.673	-0.3126	-1.9716	-1.0654	0.673	-0.3126	3
Q60737	Csnk2a1	1.2245	0.0634	1.2054	0.8428	1.2245	0.0634	1.2054	0.8428	1
Q60738	Slc30a1	-0.5648	-0.5035	0.3744	-0.4158	-0.5648	-0.5035	0.3744	-0.4158	3
Q60754	Marco	-0.6173	-1.9999	0.1538	0.9453	-0.6173	-1.9999	0.1538	0.9453	3
Q60759	Gcdh	-0.101	-0.2074	0.1553	-0.3136	-0.101	-0.2074	0.1553	-0.3136	3
Q60766	Irgm1	-1.4933	-0.8764	1.5519	0.7675	-1.4933	-0.8764	1.5519	0.7675	3
Q60770	Stxbp3	-1.8672	-1.4585	-0.5604	-2.3701	-1.8672	-1.4585	-0.5604	-2.3701	2
Q60790	Rasa3	-0.4165	0.0841	-0.4154	0.0496	-0.4165	0.0841	-0.4154	0.0496	2
Q60841	Reln	1.4524	-1.8726	-1.6194	0.2713	1.4524	-1.8726	-1.6194	0.2713	2
Q60854	Serpinb6	-0.9447	-2.3771	1.0618	0.2501	-0.9447	-2.3771	1.0618	0.2501	3
Q60864	Stip1	0.9264	-0.089	-2.2941	-5.22	0.9264	-0.089	-2.2941	-5.22	2
Q60865	Caprin1	-0.6279	-0.8314	-1.0201	0.1043	-0.6279	-0.8314	-1.0201	0.1043	2
Q60866	Pter	1.6121	-0.31	-1.2743	-3.5461	1.6121	-0.31	-1.2743	-3.5461	2
Q60870	Reep5	-1.6131	-2.3122	0.685	0.8716	-1.6131	-2.3122	0.685	0.8716	3
Q60902	Eps15l1	-1.5133	-0.4541	-1.2822	-0.72	-1.5133	-0.4541	-1.2822	-0.72	2
Q60928	Ggt1	0.0137	-2.5365	-0.4835	-0.8562	0.0137	-2.5365	-0.4835	-0.8562	3
Q60930	Vdac2	-1.487	-1.1302	0.9841	0.8523	-1.487	-1.1302	0.9841	0.8523	3
Q60931	Vdac3	-1.7145	-1.298	1.1182	0.6457	-1.7145	-1.298	1.1182	0.6457	3
Q60932	Vdac1	-1.3061	-0.9539	1.1092	0.5671	-1.3061	-0.9539	1.1092	0.5671	3
Q60936	Coq8a	0.3705	-0.3615	-0.1444	-0.7985	0.3705	-0.3615	-0.1444	-0.7985	2
Q60991	Cyp7b1	0.1808	1.4247	-0.1276	0.5513	0.1808	1.4247	-0.1276	0.5513	1
Q60994	Adipoq	-2.0644	-0.5062	-2.3738	-1.0244	-2.0644	-0.5062	-2.3738	-1.0244	2
Q61009	Scarb1	-0.579	-0.4923	0.9808	-1.2021	-0.579	-0.4923	0.9808	-1.2021	3
Q61033	Tmpo	0.6581	1.5285	0.7504	-1.3419	0.6581	1.5285	0.7504	-1.3419	1
Q61035	Hars	-0.9456	-1.7028	1.1999	-0.3609	-0.9456	-1.7028	1.1999	-0.3609	3
Q61070	Ei24	0.3096	1.4614	-1.8161	-1.4511	0.3096	1.4614	-1.8161	-1.4511	2
Q61081	Cdc37	1.2249	1.2142	0.5145	0.0682	1.2249	1.2142	0.5145	0.0682	1
Q61093	Cybb	-0.6732	-0.6551	0.9645	1.6579	-0.6732	-0.6551	0.9645	1.6579	4
Q61102	Abcb7	-0.6197	-0.3987	1.2846	-0.0024	-0.6197	-0.3987	1.2846	-0.0024	3
Q61107	Gbp4	-0.3887	0.6716	-0.6717	-0.5752	-0.3887	0.6716	-0.6717	-0.5752	2
Q61112	Sdf4	0.4541	0.2291	0.5842	0.9358	0.4541	0.2291	0.5842	0.9358	4
Q61129	Cfi	0.9991	1.0347	-0.3045	0.3983	0.9991	1.0347	-0.3045	0.3983	1
Q61133	Gstt2	0.2897	-0.4427	-0.5312	-1.6011	0.2897	-0.4427	-0.5312	-1.6011	2
Q61144	Psen2	-0.1893	-0.5377	0.0336	0.8825	-0.1893	-0.5377	0.0336	0.8825	4
Q61147	Cp	0.4132	0.1699	-0.2824	0.7839	0.4132	0.1699	-0.2824	0.7839	1
Q61171	Prdx2	-0.2785	0.3262	-0.8266	-0.2457	-0.2785	0.3262	-0.8266	-0.2457	2
Q61176	Arg1	-0.1103	-0.3193	0.3633	0.0881	-0.1103	-0.3193	0.3633	0.0881	3
Q61187	Tsg101	-0.9769	1.2767	0.4913	0.6494	-0.9769	1.2767	0.4913	0.6494	4
Q61194	Pik3c2a	0.4574	-0.1167	-0.5452	-0.2521	0.4574	-0.1167	-0.5452	-0.2521	1
Q61206	Pafah1b2	-0.7345	0.4366	0.732	-0.694	-0.7345	0.4366	0.732	-0.694	1
Q61207	Psap	0.577	-0.2259	0.8897	1.0388	0.577	-0.2259	0.8897	1.0388	4
Q61210	Arhgef1	0.2566	-0.3193	-0.9889	-0.706	0.2566	-0.3193	-0.9889	-0.706	2
Q61233	Lcp1	-1.6461	-2.6466	1.8184	0.814	-1.6461	-2.6466	1.8184	0.814	3
Q61234	Snta1	2.684	-4.028	2.9474	-0.5918	2.684	-4.028	2.9474	-0.5918	4
Q61235	Sntb2	-0.7241	-1.3569	-0.4928	0.5792	-0.7241	-1.3569	-0.4928	0.5792	3
Q61247	Serpinf2	1.5854	0.4479	0.0701	0.8041	1.5854	0.4479	0.0701	0.8041	1
Q61285	Abcd2	-0.4055	0.3034	0.1936	0.0177	-0.4055	0.3034	0.1936	0.0177	3
Q61301	Ctnna2	-0.3718	-0.3837	0.4702	-0.2395	-0.3718	-0.3837	0.4702	-0.2395	3
Q61316	Hspa4	-0.5469	-0.4311	0.0116	-1.7205	-0.5469	-0.4311	0.0116	-1.7205	2
Q61334	Bcap29	0.3333	0.9627	-0.417	0.7753	0.3333	0.9627	-0.417	0.7753	1
Q61335	Bcap31	0.5332	1.9846	0.6777	1.0878	0.5332	1.9846	0.6777	1.0878	1
Q61337	Bad	1.6492	1.9508	0.2187	0.5344	1.6492	1.9508	0.2187	0.5344	1
Q61391	Mme	1.0399	1.6032	-0.9116	-0.6418	1.0399	1.6032	-0.9116	-0.6418	1
Q61409	Pde3b	0.3201	0.9272	-0.5362	-0.7824	0.3201	0.9272	-0.5362	-0.7824	1
Q61411	Hras	1.2906	0.0078	-0.2969	-0.6609	1.2906	0.0078	-0.2969	-0.6609	1
Q61420	Slc35a1	-0.1712	-0.5464	0.3398	1.0209	-0.1712	-0.5464	0.3398	1.0209	4
Q61425	Hadh	0.7332	-0.1542	-0.9729	-1.1229	0.7332	-0.1542	-0.9729	-1.1229	2
Q61490	Alcam	-0.573	-1.7095	2.0013	-1.496	-0.573	-1.7095	2.0013	-1.496	3
Q61503	Nt5e	0.81	-0.396	1.6466	-0.104	0.81	-0.396	1.6466	-0.104	4
Q61508	Ecm1	1.8291	0.5967	-0.0826	-1.3084	1.8291	0.5967	-0.0826	-1.3084	1
Q61510	Trim25	2.0618	0.3222	0.0494	0.0449	2.0618	0.3222	0.0494	0.0449	1
Q61539	Esrrb	-0.372	-0.6987	-0.6246	0.5279	-0.372	-0.6987	-0.6246	0.5279	3
Q61542	Stard3	0.1227	0.6287	-0.6065	-0.3157	0.1227	0.6287	-0.6065	-0.3157	1
Q61543	Glg1	-0.2577	-0.137	0.4716	1.1041	-0.2577	-0.137	0.4716	1.1041	4
Q61549	Adgre1	1.5867	-0.6508	0.5786	1.7421	1.5867	-0.6508	0.5786	1.7421	4
Q61559	Fcgrt	2.6434	1.7645	0.5184	1.4627	2.6434	1.7645	0.5184	1.4627	1
Q61578	Fdxr	0.7013	0.4956	-0.4537	-0.7221	0.7013	0.4956	-0.4537	-0.7221	1
Q61581	Igfbp7	2.4579	0.5523	0.1598	-0.664	2.4579	0.5523	0.1598	-0.664	1
Q61584	Fxr1	1.0132	-0.1679	1.6705	1.3631	1.0132	-0.1679	1.6705	1.3631	4
Q61586	Gpam	-0.8618	-0.1477	0.6845	0.0631	-0.8618	-0.1477	0.6845	0.0631	3
Q61592	Gas6	-0.1457	0.9384	-0.9936	-0.7339	-0.1457	0.9384	-0.9936	-0.7339	2
Q61595	Ktn1	-0.6195	0.6945	-0.3981	2.3905	-0.6195	0.6945	-0.3981	2.3905	4
Q61598	Gdi2	-0.1201	-0.5777	1.4533	-0.0768	-0.1201	-0.5777	1.4533	-0.0768	3
Q61646	Hp	0.8811	3.2749	2.135	2.5375	0.8811	3.2749	2.135	2.5375	1
Q61655	Ddx19a	0.2684	1.3263	1.3049	0.6568	0.2684	1.3263	1.3049	0.6568	1
Q61656	Ddx5	-1.017	-0.2524	1.0099	-0.4633	-1.017	-0.2524	1.0099	-0.4633	3
Q61694	Hsd3b5	-1.1869	0.9143	0.0816	0.3369	-1.1869	0.9143	0.0816	0.3369	4
Q61696	Hspa1a	-0.2646	-1.1762	1.1271	1.5961	-0.2646	-1.1762	1.1271	1.5961	4
Q61699	Hsph1	0.1774	0.6418	0.1322	-2.0175	0.1774	0.6418	0.1322	-2.0175	2
Q61702	Itih1	1.8626	-0.055	-1.0541	0.0266	1.8626	-0.055	-1.0541	0.0266	1
Q61703	Itih2	3.7187	2.4263	-0.1366	0.607	3.7187	2.4263	-0.1366	0.607	1
Q61704	Itih3	1.0942	1.5508	-0.2461	1.4147	1.0942	1.5508	-0.2461	1.4147	1
Q61712	Dnajc1	-0.7543	-0.0833	0.1287	-0.4645	-0.7543	-0.0833	0.1287	-0.4645	3
Q61733	Mrps31	0.2153	-0.5781	-1.1174	-0.1959	0.2153	-0.5781	-1.1174	-0.1959	2
Q61735	Cd47	-0.4552	-0.7654	0.0622	0.4473	-0.4552	-0.7654	0.0622	0.4473	3
Q61739	Itga6	0.2243	-0.8938	-0.3012	-0.8314	0.2243	-0.8938	-0.3012	-0.8314	2
Q61768	Kif5b	-1.1611	0.079	-0.7533	-1.2458	-1.1611	0.079	-0.7533	-1.2458	2
Q61772	Epha7	-0.1987	-0.4415	0.4871	0.3458	-0.1987	-0.4415	0.4871	0.3458	3
Q61792	Lasp1	1.2319	0.6583	0.2139	1.0544	1.2319	0.6583	0.2139	1.0544	1
Q61805	Lbp	2.9143	2.7263	2.478	2.2668	2.9143	2.7263	2.478	2.2668	1
Q61830	Mrc1	-0.6911	-0.1759	0.6705	2.1634	-0.6911	-0.1759	0.6705	2.1634	4
Q61838	Pzp	1.3475	-0.2098	-0.8932	-0.5128	1.3475	-0.2098	-0.8932	-0.5128	2
Q61847	Mep1b	-0.5966	0.0048	-1.0182	0.5922	-0.5966	0.0048	-1.0182	0.5922	2
Q61878	Prg2	-0.8239	-0.1448	0.9995	2.4275	-0.8239	-0.1448	0.9995	2.4275	4
Q61879	Myh10	-0.0649	-0.7793	0.1587	-0.8673	-0.0649	-0.7793	0.1587	-0.8673	3
Q61990	Pcbp2	0.3961	0.7496	0.1195	-0.3008	0.3961	0.7496	0.1195	-0.3008	1
Q62009	Postn	2.428	-0.6137	-0.3028	0.9123	2.428	-0.6137	-0.3028	0.9123	1
Q62086	Pon2	0.3663	0.3872	0.0645	0.6262	0.3663	0.3872	0.0645	0.6262	1
Q62087	Pon3	0.0165	-0.0453	0.4951	0.7608	0.0165	-0.0453	0.4951	0.7608	4
Q62093	Srsf2	0.8925	0.4371	-0.4616	0.1416	0.8925	0.4371	-0.4616	0.1416	1
Q62095	Ddx3y	0.0471	-0.0031	0.527	0.3686	0.0471	-0.0031	0.527	0.3686	3
Q62165	Dag1	0.4437	-0.3814	-0.7998	0.1295	0.4437	-0.3814	-0.7998	0.1295	2
Q62167	Ddx3x	1.0233	-0.2826	0.1018	-0.3709	1.0233	-0.2826	0.1018	-0.3709	1
Q62178	Sema4a	-0.0524	-0.1246	-1.3392	-0.1527	-0.0524	-0.1246	-1.3392	-0.1527	2
Q62186	Ssr4	0.1232	0.179	0.4534	1.1234	0.1232	0.179	0.4534	1.1234	4
Q62192	Cd180	-0.866	-2.3151	0.7336	0.9684	-0.866	-2.3151	0.7336	0.9684	3
Q62230	Siglec1	-1.0204	-2.9523	1.0729	1.6259	-1.0204	-2.9523	1.0729	1.6259	3
Q62261	Sptbn1	-1.3063	-1.4746	-0.7354	0.001	-1.3063	-1.4746	-0.7354	0.001	3
Q62293	Tgtp1	-1.4303	-1.2366	1.6237	0.0526	-1.4303	-1.2366	1.6237	0.0526	3
Q62313	Tgoln1	1.5314	1.7475	0.2274	1.438	1.5314	1.7475	0.2274	1.438	1
Q62351	Tfrc	0.3034	0.1575	-1.3932	-0.1725	0.3034	0.1575	-1.3932	-0.1725	1
Q62392	Phlda1	1.731	1.6642	-0.17	-0.4462	1.731	1.6642	-0.17	-0.4462	1
Q62393	Tpd52	-0.3516	-0.2044	-1.3392	-2.0375	-0.3516	-0.2044	-1.3392	-2.0375	2
Q62417	Sorbs1	-0.955	-0.418	-0.7116	-0.3386	-0.955	-0.418	-0.7116	-0.3386	2
Q62418	Dbnl	1.6816	0.6102	0.3409	1.5498	1.6816	0.6102	0.3409	1.5498	1
Q62422	Ostf1	0.6124	0.9437	-0.4182	-0.5226	0.6124	0.9437	-0.4182	-0.5226	1
Q62425	Ndufa4	-1.0584	1.1541	1.2021	-1.3028	-1.0584	1.1541	1.2021	-1.3028	3
Q62426	Cstb	-1.6488	-0.5104	2.1072	1.0451	-1.6488	-0.5104	2.1072	1.0451	3
Q62433	Ndrg1	0.7934	0.4051	-1.7212	-0.1313	0.7934	0.4051	-1.7212	-0.1313	1
Q62446	Fkbp3	1.7929	1.4204	-2.2325	-1.4796	1.7929	1.4204	-2.2325	-1.4796	2
Q62448	Eif4g2	-0.1045	0.5995	1.7121	0.9199	-0.1045	0.5995	1.7121	0.9199	4
Q62452	Ugt1a9	0.0279	0.3793	0.3414	0.7989	0.0279	0.3793	0.3414	0.7989	1
Q62465	Vat1	0.027	0.4316	0.0786	-1.8168	0.027	0.4316	0.0786	-1.8168	2
Q62470	Itga3	0.69	-2.0194	-0.3289	-0.1597	0.69	-2.0194	-0.3289	-0.1597	3
Q63739	Ptp4a1	-0.0282	-2.5719	0.7037	-0.3522	-0.0282	-2.5719	0.7037	-0.3522	3
Q63829	Commd3	1.1836	0.4062	-0.1752	-0.4765	1.1836	0.4062	-0.1752	-0.4765	1
Q63844	Mapk3	-0.3569	1.2381	-0.431	0.9007	-0.3569	1.2381	-0.431	0.9007	1
Q63880	Ces3a	1.5164	1.3207	0.4643	1.5344	1.5164	1.3207	0.4643	1.5344	1
Q63886	Ugt1a1	0.019	0.434	0.0674	0.7329	0.019	0.434	0.0674	0.7329	1
Q63961	Eng	-0.5514	-1.5672	2.314	0.7398	-0.5514	-1.5672	2.314	0.7398	3
Q64105	Spr	1.1162	0.3106	-2.137	-2.6697	1.1162	0.3106	-2.137	-2.6697	2
Q64133	Maoa	-1.3804	-1.0349	1.0574	0.6631	-1.3804	-1.0349	1.0574	0.6631	3
Q64176	Ces1e	0.4852	0.7757	-0.6806	1.644	0.4852	0.7757	-0.6806	1.644	1
Q64191	Aga	-0.7852	-0.8432	2.2619	3.2281	-0.7852	-0.8432	2.2619	3.2281	4
Q64282	Ifit1	-1.3668	-1.4077	0.4195	0.6442	-1.3668	-1.4077	0.4195	0.6442	3
Q64285	Cel	1.2895	-0.516	-1.0115	-0.5556	1.2895	-0.516	-1.0115	-0.5556	2
Q64310	Surf4	-0.1023	0.8829	0.6017	1.0464	-0.1023	0.8829	0.6017	1.0464	1
Q64324	Stxbp2	1.539	-0.3394	-0.7985	-1.1308	1.539	-0.3394	-0.7985	-1.1308	2
Q64331	Myo6	-1.2307	2.0697	0.6293	-1.0764	-1.2307	2.0697	0.6293	-1.0764	3
Q64337	Sqstm1	5.6787	2.3752	-1.1307	0.3152	5.6787	2.3752	-1.1307	0.3152	1
Q64339	Isg15	-1.5059	-1.8169	1.6469	1.1608	-1.5059	-1.8169	1.6469	1.1608	3
Q64373	Bcl2l1	1.9383	-0.4559	1.0451	-0.3899	1.9383	-0.4559	1.0451	-0.3899	1
Q64374	Rgn	1.7416	0.0136	-0.064	-2.3197	1.7416	0.0136	-0.064	-2.3197	2
Q64433	Hspe1	0.4939	-0.0724	-1.4333	-1.4432	0.4939	-0.0724	-1.4333	-1.4432	2
Q64435	Ugt1a6	-0.0867	0.7983	0.8863	1.7601	-0.0867	0.7983	0.8863	1.7601	4
Q64437	Adh7	0.5935	-0.7867	0.4651	-0.013	0.5935	-0.7867	0.4651	-0.013	3
Q64442	Sord	0.2839	0.0291	-2.4207	-3.1002	0.2839	0.0291	-2.4207	-3.1002	2
Q64446	Atp7b	-0.0857	0.0045	0.3504	0.0755	-0.0857	0.0045	0.3504	0.0755	3
Q64455	Ptprj	-0.9988	0.0126	0.7578	1.314	-0.9988	0.0126	0.7578	1.314	4
Q64458	Cyp2c29	0.0352	-0.5507	0.6018	1.0291	0.0352	-0.5507	0.6018	1.0291	4
Q64459	Cyp3a11	-0.1013	1.0247	1.249	1.3265	-0.1013	1.0247	1.249	1.3265	4
Q64462	Cyp4b1	-0.436	0.0908	0.0536	1.1379	-0.436	0.0908	0.0536	1.1379	4
Q64464	Cyp3a13	-0.1739	0.521	0.676	1.616	-0.1739	0.521	0.676	1.616	4
Q64471	Gstt1	0.9125	1.0723	-0.1565	-3.4894	0.9125	1.0723	-0.1565	-3.4894	2
Q64475	Hist1h2bb	-0.6112	-0.93	-0.1765	-1.0197	-0.6112	-0.93	-0.1765	-1.0197	3
Q64478	Hist1h2bh	-0.616	-0.8237	-0.2241	-1.0885	-0.616	-0.8237	-0.2241	-1.0885	3
Q64481	Cyp3a16	-0.9907	-0.2269	0.0182	-1.4242	-0.9907	-0.2269	0.0182	-1.4242	2
Q64487	Ptprd	-0.172	0.6223	-0.1493	0.5553	-0.172	0.6223	-0.1493	0.5553	1
Q64505	Cyp7a1	-0.3634	-1.2119	0.1966	-0.0048	-0.3634	-1.2119	0.1966	-0.0048	3
Q64514	Tpp2	0.0378	0.219	-0.5834	-1.5636	0.0378	0.219	-0.5834	-1.5636	2
Q64516	Gk	0.0246	0.2061	-0.2716	-1.2967	0.0246	0.2061	-0.2716	-1.2967	2
Q64521	Gpd2	-0.7558	-0.595	1.036	0.5285	-0.7558	-0.595	1.036	0.5285	3
Q64523	Hist2h2ac	0.0268	-0.9256	-0.4448	-0.8679	0.0268	-0.9256	-0.4448	-0.8679	2
Q64525	Hist2h2bb	-0.4546	-0.7527	-0.1522	-1.1976	-0.4546	-0.7527	-0.1522	-1.1976	3
Q64674	Srm	0.8052	0.7931	1.5052	-1.4043	0.8052	0.7931	1.5052	-1.4043	1
Q64685	St6gal1	-0.2726	0.0145	0.0982	0.6529	-0.2726	0.0145	0.0982	0.6529	4
Q64726	Azgp1	1.5813	0.9059	0.3908	1.3103	1.5813	0.9059	0.3908	1.3103	1
Q64727	Vcl	-0.4143	-0.6704	0.9291	-0.0003	-0.4143	-0.6704	0.9291	-0.0003	3
Q64735	Cr1l	-2.003	-0.7314	1.5379	0.1316	-2.003	-0.7314	1.5379	0.1316	3
Q64737	Gart	1.0221	0.4709	-3.0725	-3.2134	1.0221	0.4709	-3.0725	-3.2134	2
Q64FW2	Retsat	0.6279	1.003	0.0006	1.2792	0.6279	1.003	0.0006	1.2792	1
Q66GT5	Ptpmt1	0.1922	0.5766	-0.8352	-0.2688	0.1922	0.5766	-0.8352	-0.2688	1
Q66JS6	Eif3j2	0.018	2.1686	-0.3617	-0.8939	0.018	2.1686	-0.3617	-0.8939	2
Q68FD5	Cltc	-0.2983	-0.036	0.4875	0.7489	-0.2983	-0.036	0.4875	0.7489	4
Q68FL6	Mars	-0.641	-0.4477	-0.5757	-1.5744	-0.641	-0.4477	-0.5757	-1.5744	2
Q69ZF3	Gba2	-1.7443	-0.5019	1.425	-0.0978	-1.7443	-0.5019	1.425	-0.0978	3
Q69ZN7	Myof	-2.0741	-1.4184	0.1719	1.117	-2.0741	-1.4184	0.1719	1.117	3
Q69ZP3	Pnkd	1.1421	-0.5021	1.0553	1.878	1.1421	-0.5021	1.0553	1.878	4
Q69ZQ1	Myorg	1.2418	1.2863	-0.3074	-1.3479	1.2418	1.2863	-0.3074	-1.3479	1
Q69ZR2	Hectd1	-0.237	0.2421	0.957	-0.6307	-0.237	0.2421	0.957	-0.6307	1
Q69ZS7	Hbs1l	1.1974	-0.9478	-0.1462	-0.696	1.1974	-0.9478	-0.1462	-0.696	2
Q69ZZ6	Tmcc1	0.7679	0.1698	0.6336	-0.3326	0.7679	0.1698	0.6336	-0.3326	1
Q6A0A9	FAM120A	0.4739	0.374	0.2382	-1.9188	0.4739	0.374	0.2382	-1.9188	2
Q6DYE8	Enpp3	1.6332	-1.2566	0.0915	0.1959	1.6332	-1.2566	0.0915	0.1959	1
Q6GQS1	Slc25a23	-0.5825	-0.1825	0.3894	-0.4702	-0.5825	-0.1825	0.3894	-0.4702	3
Q6GQT6	Scap	1.4817	-0.4116	-0.3145	-0.598	1.4817	-0.4116	-0.3145	-0.598	1
Q6GQT9	Nomo1	-0.3862	0.0812	-0.2751	0.6637	-0.3862	0.0812	-0.2751	0.6637	4
Q6GSS7	Hist2h2aa2	-0.002	-1.0672	-0.3134	-0.7801	-0.002	-1.0672	-0.3134	-0.7801	2
Q6GV12	Kdsr	-0.166	0.8165	0.4527	-0.7651	-0.166	0.8165	0.4527	-0.7651	1
Q6IFX2	Krt42	-0.0983	0.4576	-0.0665	-0.615	-0.0983	0.4576	-0.0665	-0.615	1
Q6IME9	Krt72	-0.25	-0.822	0.3649	-0.2286	-0.25	-0.822	0.3649	-0.2286	3
Q6IRU2	Tpm4	0.158	0.0142	-0.0925	-0.0412	0.158	0.0142	-0.0925	-0.0412	1
Q6IRU5	Cltb	1.2515	0.457	-0.4882	-0.6304	1.2515	0.457	-0.4882	-0.6304	1
Q6NSR8	Npepl1	0.1316	-0.3908	-0.7618	-0.7963	0.1316	-0.3908	-0.7618	-0.7963	2
Q6NWW9	Fndc3b	-0.8681	-0.723	1.6268	3.3078	-0.8681	-0.723	1.6268	3.3078	4
Q6NXM2	Rcbtb1	-1.1276	-0.7065	0.2516	1.9649	-1.1276	-0.7065	0.2516	1.9649	4
Q6NZC7	Sec23ip	-0.1162	-1.3531	1.3379	-0.0929	-0.1162	-1.3531	1.3379	-0.0929	3
Q6NZJ6	Eif4g1	-0.0347	0.6377	0.4725	0.701	-0.0347	0.6377	0.4725	0.701	1
Q6P069	Sri	0.3778	0.76	-0.448	-0.9901	0.3778	0.76	-0.448	-0.9901	1
Q6P3A8	Bckdhb	-0.0513	-0.8948	1.2075	0.5981	-0.0513	-0.8948	1.2075	0.5981	3
Q6P3D0	Nudt16	0.6338	0.0989	-1.0261	-0.5671	0.6338	0.0989	-1.0261	-0.5671	1
Q6P4T2	Snrnp200	-0.8639	-0.1732	-0.1739	0.9539	-0.8639	-0.1732	-0.1739	0.9539	4
Q6P542	Abcf1	0.2296	0.5719	-3.0797	-2.1542	0.2296	0.5719	-3.0797	-2.1542	2
Q6P5E4	Uggt1	0.021	0.2499	0.8358	1.3865	0.021	0.2499	0.8358	1.3865	4
Q6P6J9	Txndc15	0.812	1.0804	0.3452	1.2918	0.812	1.0804	0.3452	1.2918	1
Q6P6M5	Pex11g	-1.8739	-0.2952	1.5132	1.7237	-1.8739	-0.2952	1.5132	1.7237	4
Q6P6M7	Sepsecs	-0.2541	-0.1643	0.5339	0.0961	-0.2541	-0.1643	0.5339	0.0961	3
Q6P8J7	Ckmt2	-0.528	-0.986	0.1306	-0.0786	-0.528	-0.986	0.1306	-0.0786	3
Q6P8X1	Snx6	0.3269	-0.7962	-1.4162	-2.1254	0.3269	-0.7962	-1.4162	-2.1254	2
Q6P9J9	Ano6	-0.2645	0.3838	1.9626	0.0945	-0.2645	0.3838	1.9626	0.0945	4
Q6P9Q6	Fkbp15	1.6243	-0.1089	2.7227	1.109	1.6243	-0.1089	2.7227	1.109	4
Q6P9R2	Oxsr1	-0.5024	-0.7445	0.0396	-1.025	-0.5024	-0.7445	0.0396	-1.025	3
Q6PA06	Atl2	0.6178	0.8719	-0.1618	0.2942	0.6178	0.8719	-0.1618	0.2942	1
Q6PB44	Ptpn23	0.5201	-1.2499	-1.424	-3.3191	0.5201	-1.2499	-1.424	-3.3191	2
Q6PB66	Lrpprc	-0.6969	-0.7219	1.3563	0.2594	-0.6969	-0.7219	1.3563	0.2594	3
Q6PB93	Galnt2	-0.0669	0.2706	0.0471	1.2351	-0.0669	0.2706	0.0471	1.2351	4
Q6PCP5	Mff	1.7429	2.0156	0.1061	-1.5626	1.7429	2.0156	0.1061	-1.5626	1
Q6PD03	Ppp2r5a	-2.1313	0.8744	-0.2907	-0.7176	-2.1313	0.8744	-0.2907	-0.7176	2
Q6PD19	Armh3	-0.5712	-1.1186	1.4275	2.4063	-0.5712	-1.1186	1.4275	2.4063	4
Q6PD26	Pigs	-0.5394	-0.2634	0.9333	0.4486	-0.5394	-0.2634	0.9333	0.4486	3
Q6PDG8	Mon1a	-0.4559	1.1281	0.1611	1.7179	-0.4559	1.1281	0.1611	1.7179	4
Q6PDI5	Ecpas	-1.0623	-0.4175	0.3877	-0.5789	-1.0623	-0.4175	0.3877	-0.5789	3
Q6PDL0	Dync1li2	-1.0259	1.3006	0.0656	-0.1318	-1.0259	1.3006	0.0656	-0.1318	4
Q6PDM2	Srsf1	-0.3559	-0.3849	0.1258	-0.3254	-0.3559	-0.3849	0.1258	-0.3254	3
Q6PDN3	Mylk	-0.5144	1.1927	-0.219	0.9228	-0.5144	1.1927	-0.219	0.9228	1
Q6PE84	Stoml3	-0.7473	-0.0032	-1.731	-0.52	-0.7473	-0.0032	-1.731	-0.52	2
Q6PEM8	Slc46a1	1.8983	2.1007	0.6856	0.6494	1.8983	2.1007	0.6856	0.6494	1
Q6PF93	Pik3c3	-0.6137	2.6328	-0.4097	3.4702	-0.6137	2.6328	-0.4097	3.4702	4
Q6PGB6	Naa50	1.0014	0.2078	-0.4289	-1.2691	1.0014	0.2078	-0.4289	-1.2691	2
Q6PGC1	Dhx29	-1.8508	0.0521	-1.0726	-0.2635	-1.8508	0.0521	-1.0726	-0.2635	2
Q6PGF7	Exoc8	1.2731	1.6309	-1.1061	-1.2758	1.2731	1.6309	-1.1061	-1.2758	1
Q6PHN9	Rab35	-0.8756	-1.2501	-0.334	-0.2799	-0.8756	-1.2501	-0.334	-0.2799	3
Q6PIP5	Nudcd1	-1.4401	1.8795	-1.8522	0.6871	-1.4401	1.8795	-1.8522	0.6871	1
Q6Q477	Atp2b4	-0.299	1.1915	-0.6011	-3.096	-0.299	1.1915	-0.6011	-3.096	2
Q6Q899	Ddx58	-0.2328	0.6061	-1.7708	0.02	-0.2328	0.6061	-1.7708	0.02	2
Q6QD59	Bnip1	0.0245	-0.5206	0.4013	-0.1212	0.0245	-0.5206	0.4013	-0.1212	3
Q6QI06	Rictor	-0.4056	-1.2001	-0.2733	0.2796	-0.4056	-1.2001	-0.2733	0.2796	3
Q6R0H7	Gnas	-1.2111	-0.7751	0.4503	-1.0481	-1.2111	-0.7751	0.4503	-1.0481	3
Q6SJQ0	Cd300a	-0.1085	-1.4845	-0.9554	0.0668	-0.1085	-1.4845	-0.9554	0.0668	3
Q6TCG2	Paqr9	-0.1455	0.4359	0.0399	1.1395	-0.1455	0.4359	0.0399	1.1395	1
Q6TEK5	Vkorc1l1	-0.683	1.5292	-0.122	2.1142	-0.683	1.5292	-0.122	2.1142	4
Q6URW6	Myh14	-0.0015	-1.3219	1.0106	0.9333	-0.0015	-1.3219	1.0106	0.9333	4
Q6WVG3	Kctd12	-0.1971	-0.4016	-0.6356	-0.7871	-0.1971	-0.4016	-0.6356	-0.7871	2
Q6X893	Slc44a1	-0.2023	-1.0008	1.0718	-0.5565	-0.2023	-1.0008	1.0718	-0.5565	3
Q6XVG2	Cyp2c54	0.7378	0.9738	0.5195	1.1162	0.7378	0.9738	0.5195	1.1162	1
Q6ZPE2	Sbf1	-0.7973	0.9431	1.9897	0.8879	-0.7973	0.9431	1.9897	0.8879	4
Q6ZPJ0	Tex2	0.794	2.0509	-0.8496	-1.0597	0.794	2.0509	-0.8496	-1.0597	1
Q6ZQ08	Cnot1	-0.4877	0.0681	0.6593	-0.2912	-0.4877	0.0681	0.6593	-0.2912	3
Q6ZQ38	Cand1	-0.8558	-0.6247	-0.3627	-0.8836	-0.8558	-0.6247	-0.3627	-0.8836	3
Q6ZQ58	Larp1	0.2077	0.3213	-0.1367	1.5339	0.2077	0.3213	-0.1367	1.5339	4
Q6ZQ89	March6	0.5057	-0.6229	1.9675	1.4251	0.5057	-0.6229	1.9675	1.4251	4
Q6ZQI3	Mlec	0.0428	0.0624	0.3409	1.2331	0.0428	0.0624	0.3409	1.2331	4
Q6ZQM8	Ugt1a7c	-2.2084	-1.4471	-0.7452	0.35	-2.2084	-1.4471	-0.7452	0.35	2
Q6ZWN5	Rps9	-0.0935	-0.4931	-0.3875	0.2529	-0.0935	-0.4931	-0.3875	0.2529	2
Q6ZWQ7	Spcs3	0.1596	0.0048	0.3198	0.9816	0.1596	0.0048	0.3198	0.9816	4
Q6ZWV3	Rpl10	0.3477	0.6474	-0.7838	-0.1331	0.3477	0.6474	-0.7838	-0.1331	1
Q6ZWV7	Rpl35	0.0735	0.5806	-0.5852	-0.0947	0.0735	0.5806	-0.5852	-0.0947	1
Q6ZWX6	Eif2s1	-1.3571	-1.2211	-1.1349	-0.2727	-1.3571	-1.2211	-1.1349	-0.2727	2
Q6ZWY3	Rps27l	0.2301	1.037	-1.0189	-0.7722	0.2301	1.037	-1.0189	-0.7722	2
Q6ZWY9	Hist1h2bg	-0.5564	-0.8277	-0.1158	-1.0718	-0.5564	-0.8277	-0.1158	-1.0718	3
Q70FJ1	Akap9	1.0409	0.167	-0.1716	-0.2426	1.0409	0.167	-0.1716	-0.2426	1
Q71KT5	Tm7sf2	0.3009	-0.2821	0.3605	1.0836	0.3009	-0.2821	0.3605	1.0836	4
Q71KU9	Fgl1	2.5921	2.7816	1.2915	4.2563	2.5921	2.7816	1.2915	4.2563	1
Q71LX4	Tln2	0.1928	-0.052	0.1181	0.4656	0.1928	-0.052	0.1181	0.4656	1
Q71RI9	Kyat3	-0.0842	-0.8938	-0.0032	0.2607	-0.0842	-0.8938	-0.0032	0.2607	3
Q76M72	Slc22a27	0.0402	-0.5151	1.1688	-1.1371	0.0402	-0.5151	1.1688	-1.1371	3
Q76MZ3	Ppp2r1a	0.6486	0.4157	0.9538	0.2386	0.6486	0.4157	0.9538	0.2386	1
Q78IK2	Atp5md	-0.1973	-0.0766	0.3632	0.4243	-0.1973	-0.0766	0.3632	0.4243	3
Q78IK4	Apool	-0.5521	0.1153	0.5011	0.5214	-0.5521	0.1153	0.5011	0.5214	4
Q78IQ7	Slc39a4	-0.4017	-0.3794	0.9888	0.3282	-0.4017	-0.3794	0.9888	0.3282	3
Q78IS1	Tmed3	-0.9908	0.4434	0.6244	1.3867	-0.9908	0.4434	0.6244	1.3867	4
Q78JN3	Eci3	-0.5405	-0.7801	-1.0402	-0.5409	-0.5405	-0.7801	-1.0402	-0.5409	2
Q78JT3	Haao	1.0285	-0.083	-1.3129	-1.8069	1.0285	-0.083	-1.3129	-1.8069	2
Q78KK3	Slc22a18	-0.6266	-0.0431	-1.0617	0.6187	-0.6266	-0.0431	-1.0617	0.6187	2
Q78PY7	Snd1	0.5332	0.4048	-0.5958	-0.0269	0.5332	0.4048	-0.5958	-0.0269	1
Q78ZA7	Nap1l4	-0.7251	1.8463	-0.6178	0.274	-0.7251	1.8463	-0.6178	0.274	1
Q791T5	Mtch1	-1.0482	0.2923	0.3356	0.6552	-1.0482	0.2923	0.3356	0.6552	4
Q791V5	Mtch2	-1.1888	-0.6747	1.2577	0.3319	-1.1888	-0.6747	1.2577	0.3319	3
Q7M6Y3	Picalm	-0.0252	0.0887	-0.5633	-0.2053	-0.0252	0.0887	-0.5633	-0.2053	1
Q7TMB8	Cyfip1	0.2748	-0.2449	1.1627	0.3121	0.2748	-0.2449	1.1627	0.3121	4
Q7TMF3	Ndufa12	-0.0236	-0.3429	-0.5275	-0.4205	-0.0236	-0.3429	-0.5275	-0.4205	2
Q7TMK9	Syncrip	0.0478	-0.0065	-0.0708	0.1442	0.0478	-0.0065	-0.0708	0.1442	1
Q7TMM9	Tubb2a	0.0856	0.4008	-1.1693	-1.5699	0.0856	0.4008	-1.1693	-1.5699	2
Q7TMQ7	Wdr91	-0.683	-0.3483	0.9843	0.4752	-0.683	-0.3483	0.9843	0.4752	3
Q7TMR0	Prcp	-0.5778	-1.0685	1.5875	4.3057	-0.5778	-1.0685	1.5875	4.3057	4
Q7TMS5	Abcg2	-0.343	-0.0236	-1.4823	-3.383	-0.343	-0.0236	-1.4823	-3.383	2
Q7TMV3	Fastkd5	0.5141	-0.8623	-0.3839	0.034	0.5141	-0.8623	-0.3839	0.034	2
Q7TMY8	Huwe1	1.1467	-0.5334	-0.4968	-1.4553	1.1467	-0.5334	-0.4968	-1.4553	2
Q7TN29	Smap2	0.8857	1.0233	-0.6289	-0.6637	0.8857	1.0233	-0.6289	-0.6637	1
Q7TNC4	Luc7l2	2.6188	1.5342	-0.8209	1.7429	2.6188	1.5342	-0.8209	1.7429	1
Q7TNE1	Sugct	0.0865	0.1016	-0.3872	-0.0294	0.0865	0.1016	-0.3872	-0.0294	1
Q7TNG8	Ldhd	0.0383	-0.0477	-1.2087	-1.1048	0.0383	-0.0477	-1.2087	-1.1048	2
Q7TPR4	Actn1	0.4415	0.4124	2.3937	1.6221	0.4415	0.4124	2.3937	1.6221	4
Q7TPZ8	Cpa1	0.0779	-0.5617	-0.259	1.5622	0.0779	-0.5617	-0.259	1.5622	4
Q7TQ95	Lnpk	1.6957	2.4236	-0.2492	1.4687	1.6957	2.4236	-0.2492	1.4687	1
Q7TQI3	Otub1	1.0692	0.8418	0.7382	0.482	1.0692	0.8418	0.7382	0.482	1
Q7TSQ8	Pdpr	-1.0444	-0.3393	-0.6323	1.4632	-1.0444	-0.3393	-0.6323	1.4632	4
Q7TT50	Cdc42bpb	-0.3473	-0.2811	3.6216	1.6504	-0.3473	-0.2811	3.6216	1.6504	4
Q80SU7	Gvin1	-1.3372	-1.2073	2.3197	0.4368	-1.3372	-1.2073	2.3197	0.4368	3
Q80SW1	Ahcyl1	0.4357	-0.7385	0.2516	1.25	0.4357	-0.7385	0.2516	1.25	4
Q80SY4	Mib1	-0.1092	-0.801	-0.7355	-0.3275	-0.1092	-0.801	-0.7355	-0.3275	2
Q80TH2	Erbin	0.1649	-0.1046	1.1216	0.5623	0.1649	-0.1046	1.1216	0.5623	4
Q80TN4	Dnajc16	-1.1209	-0.3566	0.9583	1.472	-1.1209	-0.3566	0.9583	1.472	4
Q80TN5	Zdhhc17	-0.2	-0.2826	1.1661	1.1236	-0.2	-0.2826	1.1661	1.1236	4
Q80TY5	Vps13b	-1.7156	-0.202	-0.3421	-0.1932	-1.7156	-0.202	-0.3421	-0.1932	2
Q80U63	Mfn2	-0.489	-0.5188	-0.474	-0.8423	-0.489	-0.5188	-0.474	-0.8423	2
Q80U72	Scrib	0.411	0.5577	1.2733	0.4438	0.411	0.5577	1.2733	0.4438	1
Q80UG1	Fads6	0.6289	0.9162	0.8749	0.6605	0.6289	0.9162	0.8749	0.6605	1
Q80UG5	Septin9	0.2154	-0.0838	-1.5943	-2.5845	0.2154	-0.0838	-1.5943	-2.5845	2
Q80UM7	Mogs	0.0462	0.5965	0.0207	0.6838	0.0462	0.5965	0.0207	0.6838	1
Q80UU9	Pgrmc2	0.1321	0.8924	-0.9997	-0.2879	0.1321	0.8924	-0.9997	-0.2879	1
Q80V03	Adck5	0.2035	0.9943	-0.1712	-0.6439	0.2035	0.9943	-0.1712	-0.6439	1
Q80V26	Impad1	-0.7353	-0.0287	1.0437	2.1976	-0.7353	-0.0287	1.0437	2.1976	4
Q80VD1	Fam98b	-0.2283	0.4846	1.4996	-0.6637	-0.2283	0.4846	1.4996	-0.6637	1
Q80VL1	Tdrkh	1.6949	-0.7023	-0.5603	-1.5392	1.6949	-0.7023	-0.5603	-1.5392	2
Q80VQ0	Aldh3b1	-0.2435	-0.9107	0.0439	3.3387	-0.2435	-0.9107	0.0439	3.3387	4
Q80W21	Gstm7	1.2523	0.0458	0.2942	-2.5143	1.2523	0.0458	0.2942	-2.5143	2
Q80W22	Thnsl2	0.2742	0.3767	-1.9553	-1.2809	0.2742	0.3767	-1.9553	-1.2809	2
Q80W54	Zmpste24	-0.3603	0.1986	0.6447	1.2462	-0.3603	0.1986	0.6447	1.2462	4
Q80W65	Pcsk9	1.6948	2.0205	-0.3201	-0.7782	1.6948	2.0205	-0.3201	-0.7782	1
Q80WC7	Agfg2	2.1192	1.8363	0.514	0.3948	2.1192	1.8363	0.514	0.3948	1
Q80WG5	Lrrc8a	1.6892	-0.4904	-2.2434	-0.3189	1.6892	-0.4904	-2.2434	-0.3189	2
Q80WJ7	Mtdh	-0.195	1.3656	-0.6753	0.0249	-0.195	1.3656	-0.6753	0.0249	1
Q80WQ2	Vac14	0.2918	0.6025	-0.0259	-0.122	0.2918	0.6025	-0.0259	-0.122	1
Q80WW9	Ddrgk1	0.1103	0.1913	-0.7103	0.0501	0.1103	0.1913	-0.7103	0.0501	1
Q80X19	Col14a1	-0.8422	-0.2829	-0.8963	-0.2727	-0.8422	-0.2829	-0.8963	-0.2727	2
Q80X50	Ubap2l	1.1918	0.7698	-0.3844	-3.6121	1.1918	0.7698	-0.3844	-3.6121	2
Q80X71	Tmem106b	0.8205	-0.6379	2.4344	2.6696	0.8205	-0.6379	2.4344	2.6696	4
Q80X80	C2cd2l	1.1784	0.6837	0.3507	0.9922	1.1784	0.6837	0.3507	0.9922	1
Q80X85	Mrps7	-0.0588	-0.2632	-0.4965	-0.1769	-0.0588	-0.2632	-0.4965	-0.1769	2
Q80X89	Ugt2a1	0.5779	0.9878	-0.5232	-0.2289	0.5779	0.9878	-0.5232	-0.2289	1
Q80X90	Flnb	0.8437	0.1821	0.0292	0.4066	0.8437	0.1821	0.0292	0.4066	1
Q80X95	Rraga	-1.064	-1.5114	-0.5673	1.2908	-1.064	-1.5114	-0.5673	1.2908	3
Q80XL6	Acad11	-0.2322	0.4253	-0.3909	-0.0834	-0.2322	0.4253	-0.3909	-0.0834	1
Q80XL7	Mppe1	0.365	0.4557	-1.1039	-1.8086	0.365	0.4557	-1.1039	-1.8086	2
Q80XN0	Bdh1	0.6823	0.2996	-0.655	-0.8177	0.6823	0.2996	-0.655	-0.8177	1
Q80XR2	Atp2c1	-0.2378	0.7465	-0.9593	-0.0556	-0.2378	0.7465	-0.9593	-0.0556	2
Q80Y14	Glrx5	0.2704	-0.2213	-0.2564	-0.7325	0.2704	-0.2213	-0.2564	-0.7325	2
Q80YC5	F12	0.7603	0.4105	-1.3898	-0.6459	0.7603	0.4105	-1.3898	-0.6459	1
Q80YD1	Supv3l1	-0.47	-0.7484	0.8172	0.658	-0.47	-0.7484	0.8172	0.658	3
Q80YE7	Dapk1	0.1145	0.5061	-1.694	1.7989	0.1145	0.5061	-1.694	1.7989	4
Q80YW0	Cyth4	-0.1824	0.7648	-0.0119	0.478	-0.1824	0.7648	-0.0119	0.478	1
Q80ZJ1	Rap2a	0.4981	0.3392	1.0815	-1.2152	0.4981	0.3392	1.0815	-1.2152	1
Q80ZM8	Crls1	-1.1648	-0.72	0.2631	0.3891	-1.1648	-0.72	0.2631	0.3891	3
Q80ZS3	Mrps26	-0.3649	0.1055	-0.0969	-0.8244	-0.3649	0.1055	-0.0969	-0.8244	2
Q80ZU0	Arl5a	-0.1986	0.5642	0.9422	1.4833	-0.1986	0.5642	0.9422	1.4833	4
Q810B6	Ankfy1	0.3603	0.7242	1.4314	1.5534	0.3603	0.7242	1.4314	1.5534	4
Q810J8	Zfyve1	-0.2171	1.0609	0.393	-1.4189	-0.2171	1.0609	0.393	-1.4189	3
Q811D0	Dlg1	0.6097	-0.0349	0.0316	-1.1526	0.6097	-0.0349	0.0316	-1.1526	2
Q811I0	Atpaf1	-0.7754	-0.5461	0.803	1.5365	-0.7754	-0.5461	0.803	1.5365	4
Q811U4	Mfn1	-0.3413	-0.286	0.3958	-0.4389	-0.3413	-0.286	0.3958	-0.4389	3
Q8BFP9	Pdk1	-0.3706	-0.0697	0.3653	0.3537	-0.3706	-0.0697	0.3653	0.3537	3
Q8BFR4	Gns	-0.5752	-1.2488	2.2514	3.7766	-0.5752	-1.2488	2.2514	3.7766	4
Q8BFR5	Tufm	0.245	-0.0255	-1.5703	-0.9978	0.245	-0.0255	-1.5703	-0.9978	2
Q8BFS6	Cpped1	2.059	-0.2385	-0.1935	-0.0953	2.059	-0.2385	-0.1935	-0.0953	1
Q8BFU2	Hist3h2a	-0.0208	-0.8975	-0.4604	-0.7872	-0.0208	-0.8975	-0.4604	-0.7872	2
Q8BFW7	Lpp	1.6707	-0.2444	-0.583	-0.9639	1.6707	-0.2444	-0.583	-0.9639	2
Q8BFY6	Pef1	0.4729	-0.6541	-0.0942	-0.1529	0.4729	-0.6541	-0.0942	-0.1529	2
Q8BFY9	Tnpo1	0.4542	0.9847	3.6592	0.235	0.4542	0.9847	3.6592	0.235	4
Q8BFZ3	Actbl2	2.6516	0.5165	0.8264	-0.9667	2.6516	0.5165	0.8264	-0.9667	1
Q8BFZ9	Erlin2	-1.0248	-0.1207	0.1341	0.4521	-1.0248	-0.1207	0.1341	0.4521	3
Q8BG07	Pld4	-1.2767	-1.1931	2.0396	2.3963	-1.2767	-1.1931	2.0396	2.3963	4
Q8BG32	Psmd11	0.6742	-0.9451	-0.6054	-1.2545	0.6742	-0.9451	-0.6054	-1.2545	2
Q8BG51	Rhot1	-0.4293	-0.3947	-0.2854	-0.2534	-0.4293	-0.3947	-0.2854	-0.2534	3
Q8BG67	Efr3a	-1.245	-0.441	-0.0901	-0.6215	-1.245	-0.441	-0.0901	-0.6215	3
Q8BGA8	Acsm5	0.0171	-0.887	0.7168	0.5941	0.0171	-0.887	0.7168	0.5941	3
Q8BGA9	Oxa1l	-0.8125	-0.136	-0.1397	-0.0874	-0.8125	-0.136	-0.1397	-0.0874	3
Q8BGB2	Ttc7a	0.3976	0.4638	-0.5432	-1.0153	0.3976	0.4638	-0.5432	-1.0153	1
Q8BGB8	Coq4	-0.6954	0.8308	-0.8654	0.2889	-0.6954	0.8308	-0.8654	0.2889	1
Q8BGC4	Zadh2	0.6441	0.2135	-0.5355	-1.1977	0.6441	0.2135	-0.5355	-1.1977	2
Q8BGD9	Eif4b	-0.8419	1.0437	0.8845	-1.245	-0.8419	1.0437	0.8845	-1.245	3
Q8BGF6	Elmod2	-0.3759	-1.6881	2.9938	1.0953	-0.3759	-1.6881	2.9938	1.0953	3
Q8BGF9	Slc25a44	-0.8651	-0.1865	0.3187	0.6696	-0.8651	-0.1865	0.3187	0.6696	3
Q8BGG9	Acnat2	-0.3441	-0.6209	2.1797	0.5681	-0.3441	-0.6209	2.1797	0.5681	4
Q8BGH2	Samm50	-1.372	-0.6676	0.8027	1.4983	-1.372	-0.6676	0.8027	1.4983	4
Q8BGI5	Pex26	-0.7839	1.0999	1.4659	-0.2772	-0.7839	1.0999	1.4659	-0.2772	3
Q8BGN3	Enpp6	-1.063	1.0676	1.0879	-1.4242	-1.063	1.0676	1.0879	-1.4242	3
Q8BGQ4	Pomt2	0.2583	-0.1772	-1.0226	0.0439	0.2583	-0.1772	-1.0226	0.0439	2
Q8BGQ7	Aars	0.1851	0.8343	0.7085	-2.3113	0.1851	0.8343	0.7085	-2.3113	2
Q8BGR2	Lrrc8d	-2.5367	0.3122	-0.7446	-1.6868	-2.5367	0.3122	-0.7446	-1.6868	2
Q8BGS1	Epb41l5	-1.4764	0.1015	0.404	0.5362	-1.4764	0.1015	0.404	0.5362	3
Q8BGS7	Cept1	0.1643	0.457	-0.1033	1.4741	0.1643	0.457	-0.1033	1.4741	4
Q8BGT5	Gpt2	-0.1592	-0.5714	0.4198	-0.1921	-0.1592	-0.5714	0.4198	-0.1921	3
Q8BGU5	Ccny	0.3554	-0.8759	0.634	0.2527	0.3554	-0.8759	0.634	0.2527	3
Q8BGV0	Nars2	0.0665	-0.8071	0.6644	0.1048	0.0665	-0.8071	0.6644	0.1048	3
Q8BGX2	Timm29	-0.6885	0.8196	0.5851	0.2686	-0.6885	0.8196	0.5851	0.2686	4
Q8BGY7	Fam210a	-0.7672	0.3868	0.2493	-0.9983	-0.7672	0.3868	0.2493	-0.9983	1
Q8BH00	Aldh8a1	1.1562	-0.232	-0.6747	-2.0748	1.1562	-0.232	-0.6747	-2.0748	2
Q8BH04	Pck2	-0.4581	-2.2418	0.6261	-0.5517	-0.4581	-2.2418	0.6261	-0.5517	3
Q8BH24	Tm9sf4	-0.457	-0.1346	0.8078	1.1736	-0.457	-0.1346	0.8078	1.1736	4
Q8BH35	C8b	0.355	-0.4775	0.8863	1.3679	0.355	-0.4775	0.8863	1.3679	4
Q8BH43	Wasf2	-0.0208	-0.7205	3.3015	2.7702	-0.0208	-0.7205	3.3015	2.7702	4
Q8BH55	Thnsl1	-0.1345	-0.8642	0.799	-0.08	-0.1345	-0.8642	0.799	-0.08	3
Q8BH59	Slc25a12	-1.1204	-0.6049	0.7114	0.4253	-1.1204	-0.6049	0.7114	0.4253	3
Q8BH69	Sephs1	0.3027	-0.7867	0.9436	-1.0124	0.3027	-0.7867	0.9436	-1.0124	3
Q8BH79	Ano10	-0.5677	-0.463	1.0025	0.2209	-0.5677	-0.463	1.0025	0.2209	3
Q8BH86	Dglucy	0.2501	0.0914	-0.6428	-1.1364	0.2501	0.0914	-0.6428	-1.1364	2
Q8BH95	Echs1	0.2403	0.0055	-1.2281	-1.3213	0.2403	0.0055	-1.2281	-1.3213	2
Q8BHA3	Dtd2	1.5594	0.1034	0.2985	-1.1373	1.5594	0.1034	0.2985	-1.1373	1
Q8BHC4	Dcakd	-0.8553	1.4889	0.961	-0.6994	-0.8553	1.4889	0.961	-0.6994	3
Q8BHD7	Ptbp3	-0.0952	-0.7799	0.9055	1.2987	-0.0952	-0.7799	0.9055	1.2987	4
Q8BHE8	Maip1	-0.4428	-0.4234	0.8758	0.4916	-0.4428	-0.4234	0.8758	0.4916	3
Q8BHF7	Pgs1	-0.3121	-2.289	1.4601	3.4762	-0.3121	-2.289	1.4601	3.4762	4
Q8BHG1	Nrdc	1.8535	2.306	-0.323	0.4683	1.8535	2.306	-0.323	0.4683	1
Q8BHG3	Tmem30b	-1.0873	-0.0176	-4.0502	-0.3539	-1.0873	-0.0176	-4.0502	-0.3539	2
Q8BHN0	Ppm1l	0.2264	0.6312	0.1155	1.8377	0.2264	0.6312	0.1155	1.8377	4
Q8BHN3	Ganab	0.2042	0.3993	0.3646	1.068	0.2042	0.3993	0.3646	1.068	1
Q8BHS6	Armcx3	-0.84	1.116	0.4418	-1.7479	-0.84	1.116	0.4418	-1.7479	3
Q8BHT7	Rgp1	-0.2273	1.3967	0.1113	0.9351	-0.2273	1.3967	0.1113	0.9351	1
Q8BI84	Mia3	0.8678	0.4255	-0.2305	0.5695	0.8678	0.4255	-0.2305	0.5695	1
Q8BIG7	Comtd1	-1.6967	-1.4148	0.5434	0.6098	-1.6967	-1.4148	0.5434	0.6098	3
Q8BIJ6	Iars2	-0.5836	-0.4031	0.3029	0.1288	-0.5836	-0.4031	0.3029	0.1288	3
Q8BIJ7	Rufy1	2.8121	0.4956	1.431	1.1504	2.8121	0.4956	1.431	1.1504	1
Q8BIK4	Dock9	-3.7853	0.775	-2.502	0.2608	-3.7853	0.775	-2.502	0.2608	2
Q8BIP0	Dars2	0.8251	-1.2075	0.889	1.0807	0.8251	-1.2075	0.889	1.0807	4
Q8BIW1	Prune1	0.7401	1.2405	-1	-0.8301	0.7401	1.2405	-1	-0.8301	1
Q8BJ03	Cox15	-1.3974	-0.5587	0.4759	1.6222	-1.3974	-0.5587	0.4759	1.6222	4
Q8BJ48	Nagpa	-0.0696	-0.2917	0.5478	0.6342	-0.0696	-0.2917	0.5478	0.6342	4
Q8BJ64	Chdh	-0.1416	0.1269	-1.9536	-1.935	-0.1416	0.1269	-1.9536	-1.935	2
Q8BJM7	Tyw1	-0.2776	1.458	0.4787	1.2374	-0.2776	1.458	0.4787	1.2374	4
Q8BJS4	Sun2	-1.8829	0.6637	1.6163	1.106	-1.8829	0.6637	1.6163	1.106	4
Q8BJT9	Edem2	1.3489	-0.3392	0.7419	-1.525	1.3489	-0.3392	0.7419	-1.525	2
Q8BJU0	Sgta	0.1576	0.557	1.104	1.1221	0.1576	0.557	1.104	1.1221	4
Q8BJU2	Tspan9	1.3638	-0.5036	1.0869	-0.0689	1.3638	-0.5036	1.0869	-0.0689	4
Q8BJW6	Eif2a	-0.2943	-1.0694	-0.4553	-1.6745	-0.2943	-1.0694	-0.4553	-1.6745	2
Q8BJY1	Psmd5	0.8343	-1.3747	0.0035	-1.9392	0.8343	-1.3747	0.0035	-1.9392	2
Q8BJZ4	Mrps35	-0.5057	-0.4467	-0.651	0.0674	-0.5057	-0.4467	-0.651	0.0674	3
Q8BK03	Miga2	-0.2978	0.5477	-0.8984	-0.7696	-0.2978	0.5477	-0.8984	-0.7696	2
Q8BK08	Tmem11	-0.671	-0.2647	0.4884	0.4609	-0.671	-0.2647	0.4884	0.4609	3
Q8BK48	Ces2e	0.5258	-0.1207	0.842	1.1552	0.5258	-0.1207	0.842	1.1552	4
Q8BK63	Csnk1a1	1.055	0.9075	0.0123	1.4868	1.055	0.9075	0.0123	1.4868	1
Q8BK64	Ahsa1	-0.3162	0.7955	0.8423	-1.0756	-0.3162	0.7955	0.8423	-1.0756	1
Q8BK72	Mrps27	-1.075	-0.4122	0.2979	0.0149	-1.075	-0.4122	0.2979	0.0149	3
Q8BKC5	Ipo5	0.6855	0.9915	1.1249	-0.1298	0.6855	0.9915	1.1249	-0.1298	1
Q8BKE6	Cyp20a1	0.3627	-0.1433	1.1283	1.0523	0.3627	-0.1433	1.1283	1.0523	4
Q8BKF1	Polrmt	0.8882	-0.816	0.3478	-1.267	0.8882	-0.816	0.3478	-1.267	2
Q8BKX1	Baiap2	0.8436	0.2263	1.9602	1.3383	0.8436	0.2263	1.9602	1.3383	4
Q8BKZ9	Pdhx	0.1628	-0.2287	-0.6428	-0.9299	0.1628	-0.2287	-0.6428	-0.9299	2
Q8BL66	Eea1	2.6163	0.8612	0.447	1.4466	2.6163	0.8612	0.447	1.4466	1
Q8BL97	Srsf7	0.6838	-0.0896	1.5659	-0.4602	0.6838	-0.0896	1.5659	-0.4602	1
Q8BLF1	Nceh1	-0.163	0.2139	-0.4594	1.2608	-0.163	0.2139	-0.4594	1.2608	4
Q8BLN5	Lss	0.7247	-0.3951	1.4686	1.349	0.7247	-0.3951	1.4686	1.349	4
Q8BLY2	Tarsl2	1.5745	-1.556	-0.9795	-1.8688	1.5745	-1.556	-0.9795	-1.8688	2
Q8BM55	Tmem214	-0.4634	0.5776	0.1008	-0.214	-0.4634	0.5776	0.1008	-0.214	3
Q8BM72	Hspa13	0.0295	0.4826	0.5217	0.5678	0.0295	0.4826	0.5217	0.5678	1
Q8BM88	Ctso	0.7086	0.0262	2.2168	2.9756	0.7086	0.0262	2.2168	2.9756	4
Q8BMA6	Srp68	-0.9285	-0.0342	0.4497	-0.4501	-0.9285	-0.0342	0.4497	-0.4501	3
Q8BMD6	Tmem260	-0.9924	-0.3753	-0.4955	-0.46	-0.9924	-0.3753	-0.4955	-0.46	2
Q8BMD8	Slc25a24	-1.0379	-0.3938	0.4227	0.1519	-1.0379	-0.3938	0.4227	0.1519	3
Q8BMF4	Dlat	-0.4208	-0.771	-0.455	-0.652	-0.4208	-0.771	-0.455	-0.652	2
Q8BMG8	Slc25a32	-1.3325	1.481	0.8815	-0.7805	-1.3325	1.481	0.8815	-0.7805	3
Q8BMJ2	Lars	-0.4906	-0.251	-1.4734	-1.7484	-0.4906	-0.251	-1.4734	-1.7484	2
Q8BMK4	Ckap4	-0.468	-0.7769	1.2591	0.6825	-0.468	-0.7769	1.2591	0.6825	3
Q8BML9	Qars	-0.846	-1.045	-0.2387	-2.3836	-0.846	-1.045	-0.2387	-2.3836	2
Q8BMS1	Hadha	-0.3034	-0.0012	-0.5535	-0.7026	-0.3034	-0.0012	-0.5535	-0.7026	2
Q8BMS4	Coq3	-0.1543	-1.0121	-0.3627	-1.6364	-0.1543	-1.0121	-0.3627	-1.6364	2
Q8BND5	Qsox1	1.4279	1.3086	1.2621	2.5047	1.4279	1.3086	1.2621	2.5047	1
Q8BNI4	Derl2	-0.1665	0.0005	0.3149	2.0413	-0.1665	0.0005	0.3149	2.0413	4
Q8BNX1	Clec4g	0.3763	1.532	0.673	0.3974	0.3763	1.532	0.673	0.3974	1
Q8BP40	Acp6	-0.9131	-1.0136	0.1636	0.3233	-0.9131	-1.0136	0.1636	0.3233	3
Q8BP47	Nars	-0.0057	0.513	0.5982	-0.7726	-0.0057	0.513	0.5982	-0.7726	1
Q8BP56	Pgghg	0.4591	-1.3524	2.055	2.8907	0.4591	-1.3524	2.055	2.8907	4
Q8BP67	Rpl24	0.4326	0.7624	-0.7575	-0.2835	0.4326	0.7624	-0.7575	-0.2835	1
Q8BP92	Rcn2	-0.9512	-1.1657	0.6242	0.6135	-0.9512	-1.1657	0.6242	0.6135	3
Q8BPM0	Daam1	-1.2862	-0.4877	-0.5223	0.1063	-1.2862	-0.4877	-0.5223	0.1063	3
Q8BPS4	Gpr180	1.0868	0.5463	0.063	1.6011	1.0868	0.5463	0.063	1.6011	1
Q8BPX9	Slc15a3	-1.4812	-0.0788	0.2679	-0.0139	-1.4812	-0.0788	0.2679	-0.0139	3
Q8BQ47	Cnpy4	0.0798	-0.7518	-0.5425	0.802	0.0798	-0.7518	-0.5425	0.802	3
Q8BR70	Yipf6	-0.1499	-0.0384	-0.4051	1.4303	-0.1499	-0.0384	-0.4051	1.4303	4
Q8BRF7	Scfd1	0.3353	0.404	0.4489	0.4368	0.3353	0.404	0.4489	0.4368	1
Q8BRH0	Tmtc3	-1.2953	0.1729	-1.1722	-0.494	-1.2953	0.1729	-1.1722	-0.494	2
Q8BRK8	Prkaa2	-0.2927	-0.387	0.2218	-0.558	-0.2927	-0.387	0.2218	-0.558	3
Q8BRK9	Man2a2	-1.8012	0.8565	2.4969	0.3255	-1.8012	0.8565	2.4969	0.3255	4
Q8BS35	Agmo	-0.2141	0.757	0.4212	1.023	-0.2141	0.757	0.4212	1.023	1
Q8BSE0	Rmdn2	-0.0489	0.1782	-1.4763	-1.2931	-0.0489	0.1782	-1.4763	-1.2931	2
Q8BSL7	Arf2	-0.0603	-0.1201	3.2935	1.3248	-0.0603	-0.1201	3.2935	1.3248	4
Q8BSM7	Slc43a1	0.3858	-0.7924	-0.4279	-0.3192	0.3858	-0.7924	-0.4279	-0.3192	2
Q8BSY0	Asph	0.3102	0.5446	-0.3014	0.0054	0.3102	0.5446	-0.3014	0.0054	1
Q8BT60	Cpne3	-0.9071	-0.2795	1.9103	0.3983	-0.9071	-0.2795	1.9103	0.3983	4
Q8BTI9	Pik3cb	1.0356	1.1469	-0.7701	-0.1284	1.0356	1.1469	-0.7701	-0.1284	1
Q8BTJ4	Enpp4	-1.1976	0.6865	0.0191	4.0739	-1.1976	0.6865	0.0191	4.0739	4
Q8BTM8	Flna	-0.2761	-2.9847	-0.4857	0.0498	-0.2761	-2.9847	-0.4857	0.0498	3
Q8BTX9	Hsdl1	-2.1237	-0.7777	0.1596	0.7119	-2.1237	-0.7777	0.1596	0.7119	3
Q8BTY1	Kyat1	0.601	1.6814	0.6864	-0.7098	0.601	1.6814	0.6864	-0.7098	1
Q8BTY8	Scfd2	-0.506	0.0154	-0.7422	1.284	-0.506	0.0154	-0.7422	1.284	4
Q8BTZ7	Gmppb	0.001	-1.3941	0.8912	-2.0949	0.001	-1.3941	0.8912	-2.0949	2
Q8BU14	Sec62	-0.2494	-0.4783	-0.8252	-0.2123	-0.2494	-0.4783	-0.8252	-0.2123	2
Q8BU30	Iars	-0.5648	-0.2236	0.695	-1.2462	-0.5648	-0.2236	0.695	-1.2462	3
Q8BU31	Rap2c	-1.2693	-1.3213	1.2784	-0.4873	-1.2693	-1.3213	1.2784	-0.4873	3
Q8BU33	Ilvbl	0.2849	0.1686	-0.2212	0.9453	0.2849	0.1686	-0.2212	0.9453	1
Q8BU88	Mrpl22	-0.912	-0.3374	0.0523	-0.691	-0.912	-0.3374	0.0523	-0.691	3
Q8BUE4	Aifm2	-1.3252	1.247	0.4956	1.3408	-1.3252	1.247	0.4956	1.3408	4
Q8BUK6	Hook3	-0.8796	-0.2776	-1.1929	-0.2667	-0.8796	-0.2776	-1.1929	-0.2667	2
Q8BUV3	Gphn	1.4139	-0.0145	-0.2372	0.6438	1.4139	-0.0145	-0.2372	0.6438	1
Q8BUV8	Gpr107	-0.2871	-1.701	-0.0638	1.0941	-0.2871	-1.701	-0.0638	1.0941	3
Q8BUY5	Timmdc1	0.8112	0.3995	-0.1691	-0.3818	0.8112	0.3995	-0.1691	-0.3818	1
Q8BVA5	Ldah	-0.4257	0.5329	0.3875	1.0372	-0.4257	0.5329	0.3875	1.0372	4
Q8BVE3	Atp6v1h	-1.9353	-0.7699	-1.7161	-0.1757	-1.9353	-0.7699	-1.7161	-0.1757	2
Q8BVG4	Dpp9	-0.5938	0.2598	1.0428	1.9369	-0.5938	0.2598	1.0428	1.9369	4
Q8BVW3	Trim14	1.8644	0.9193	1.6154	0.8795	1.8644	0.9193	1.6154	0.8795	1
Q8BW75	Maob	-1.3841	-0.8111	0.8192	0.0661	-1.3841	-0.8111	0.8192	0.0661	3
Q8BWF0	Aldh5a1	0.3886	-0.3714	0.0304	-0.5092	0.3886	-0.3714	0.0304	-0.5092	2
Q8BWG8	Arrb1	-1.5574	1.157	-3.9761	-1.5822	-1.5574	1.157	-3.9761	-1.5822	2
Q8BWH0	Slc38a7	1.0311	1.3267	2.8446	3.8377	1.0311	1.3267	2.8446	3.8377	4
Q8BWJ3	Phka2	2.0293	0.0859	0.5383	0.3228	2.0293	0.0859	0.5383	0.3228	1
Q8BWM0	Ptges2	0.2331	0.0255	0.0615	0.1783	0.2331	0.0255	0.0615	0.1783	1
Q8BWN8	Acot4	0.0832	-0.0426	0.9494	1.437	0.0832	-0.0426	0.9494	1.437	4
Q8BWP5	Ttpa	-0.7909	0.9048	0.9062	-0.8633	-0.7909	0.9048	0.9062	-0.8633	3
Q8BWP8	B4gat1	0.3289	0.8195	0.5946	0.6303	0.3289	0.8195	0.5946	0.6303	1
Q8BWQ1	Ugt2a3	0.1763	0.5667	0.1895	0.6328	0.1763	0.5667	0.1895	0.6328	1
Q8BWQ6	Vps35l	0.6713	0.7193	1.2046	1.0159	0.6713	0.7193	1.2046	1.0159	1
Q8BWS5	Gprin3	0.4073	-0.3011	-0.7632	0.8847	0.4073	-0.3011	-0.7632	0.8847	1
Q8BWT1	Acaa2	0.8335	0.2586	-1.2628	-1.1048	0.8335	0.2586	-1.2628	-1.1048	2
Q8BWY3	Etf1	0.4746	0.5303	0.0874	0.8151	0.4746	0.5303	0.0874	0.8151	1
Q8BX02	Kank2	-2.5616	-0.6215	0.411	1.3783	-2.5616	-0.6215	0.411	1.3783	3
Q8BX10	Pgam5	-1.6389	-1.0547	-1.7994	-0.6618	-1.6389	-1.0547	-1.7994	-0.6618	2
Q8BX70	Vps13c	1.2455	0.4829	0.6838	0.8885	1.2455	0.4829	0.6838	0.8885	1
Q8BX90	Fndc3a	-0.2772	-0.3716	0.3722	1.002	-0.2772	-0.3716	0.3722	1.002	4
Q8BXA1	Golim4	0.1832	0.6531	0.1541	0.3842	0.1832	0.6531	0.1541	0.3842	1
Q8BXA5	Clptm1l	0.2487	0.3387	1.3243	1.0796	0.2487	0.3387	1.3243	1.0796	4
Q8BXB6	Slco2b1	-0.0436	-0.3556	0.2316	0.0545	-0.0436	-0.3556	0.2316	0.0545	3
Q8BXJ9	Tmem62	0.0597	0.0089	0.4392	0.4385	0.0597	0.0089	0.4392	0.4385	3
Q8BXN7	Ppm1k	0.3701	-0.4901	-1.3172	-0.2644	0.3701	-0.4901	-1.3172	-0.2644	2
Q8BXN9	Tmem87a	0.2401	0.1195	1.2308	0.9521	0.2401	0.1195	1.2308	0.9521	4
Q8BXQ2	Pigt	-1.744	-0.0374	-0.0243	1.7298	-1.744	-0.0374	-0.0243	1.7298	4
Q8BXV2	Bri3bp	-0.1215	-0.7452	1.0487	1.0986	-0.1215	-0.7452	1.0487	1.0986	4
Q8BXZ1	Tmx3	-0.3067	-0.1362	0.7636	1.5633	-0.3067	-0.1362	0.7636	1.5633	4
Q8BY87	Usp47	0.0469	-0.0388	-0.8118	-1.579	0.0469	-0.0388	-0.8118	-1.579	2
Q8BY89	Slc44a2	-0.2307	-0.9223	-0.1238	1.8426	-0.2307	-0.9223	-0.1238	1.8426	4
Q8BYB9	Poglut1	0.4468	0.5375	-0.5471	-0.5502	0.4468	0.5375	-0.5471	-0.5502	1
Q8BYC6	Taok3	0.6425	0.7082	2.8292	1.0275	0.6425	0.7082	2.8292	1.0275	4
Q8BYH7	Tbc1d17	2.5983	1.4559	1.1065	0.0139	2.5983	1.4559	1.1065	0.0139	1
Q8BYI6	Lpcat2	-0.9837	1.4189	1.136	-0.4621	-0.9837	1.4189	1.136	-0.4621	3
Q8BYI8	Fam234b	2.7178	4.8292	-0.3671	-1.0684	2.7178	4.8292	-0.3671	-1.0684	1
Q8BYL4	Yars2	0.2798	-0.7942	0.5635	0.2949	0.2798	-0.7942	0.5635	0.2949	3
Q8BYM8	Cars2	-0.5555	0.1809	0.9277	0.25	-0.5555	0.1809	0.9277	0.25	3
Q8BYU6	Tor1aip2	-0.294	-0.16	0.3117	1.0214	-0.294	-0.16	0.3117	1.0214	4
Q8BYY4	Ttc39b	0.2727	0.5384	1.0217	0.4972	0.2727	0.5384	1.0217	0.4972	1
Q8BZ09	Slc25a21	-0.6602	0.1753	0.8636	-0.0679	-0.6602	0.1753	0.8636	-0.0679	3
Q8BZ20	Parp12	0.162	1.1674	-0.2051	-1.091	0.162	1.1674	-0.2051	-1.091	1
Q8BZ98	Dnm3	0.3214	-0.3305	1.7399	0.4814	0.3214	-0.3305	1.7399	0.4814	4
Q8BZN6	Dock10	-0.421	-0.7217	0.8135	2.507	-0.421	-0.7217	0.8135	2.507	4
Q8BZZ3	Wwp1	-0.7622	0.3707	-0.3594	-1.3455	-0.7622	0.3707	-0.3594	-1.3455	2
Q8C025	Chpt1	-1.7762	1.0048	-0.9012	0.5408	-1.7762	1.0048	-0.9012	0.5408	1
Q8C0C7	Farsa	0.8563	1.2577	-2.4929	-0.7371	0.8563	1.2577	-2.4929	-0.7371	2
Q8C0E2	Vps26b	-0.1215	0.0386	-0.4076	0.7371	-0.1215	0.0386	-0.4076	0.7371	4
Q8C0I1	Agps	-1.6881	-0.885	0.149	0.6868	-1.6881	-0.885	0.149	0.6868	3
Q8C0K5	Slc25a16	-1.0939	0.8061	0.3238	-0.1241	-1.0939	0.8061	0.3238	-0.1241	4
Q8C0L0	Tmx4	-0.3204	-0.3505	0.1615	0.6302	-0.3204	-0.3505	0.1615	0.6302	4
Q8C0L6	Paox	-1.7596	0.6086	-0.6095	0.8284	-1.7596	0.6086	-0.6095	0.8284	1
Q8C0N2	Gpat3	0.5587	0.8702	1.2694	-0.5272	0.5587	0.8702	1.2694	-0.5272	1
Q8C0Z1	Fam234a	-0.7421	-0.3056	-0.8436	-1.9329	-0.7421	-0.3056	-0.8436	-1.9329	2
Q8C129	Lnpep	0.0686	-0.4697	0.7814	0.9101	0.0686	-0.4697	0.7814	0.9101	4
Q8C163	Exog	-1.4786	0.933	1.0487	0.9419	-1.4786	0.933	1.0487	0.9419	4
Q8C165	Pm20d1	0.6022	0.6599	-0.1289	0.2138	0.6022	0.6599	-0.1289	0.2138	1
Q8C166	Cpne1	-0.3811	-1.4746	-1.8358	-1.665	-0.3811	-1.4746	-1.8358	-1.665	2
Q8C196	Cps1	0.0919	-0.3572	0.5751	-0.2195	0.0919	-0.3572	0.5751	-0.2195	3
Q8C1B7	Septin11	1.042	-2.3845	0.7235	-0.7163	1.042	-2.3845	0.7235	-0.7163	3
Q8C1E7	Tmem120a	-0.8501	-0.1502	-0.909	0.9472	-0.8501	-0.1502	-0.909	0.9472	2
Q8C1Y8	Ccz1	-0.0736	-0.76	0.5456	-1.1614	-0.0736	-0.76	0.5456	-1.1614	3
Q8C2E7	Washc5	-2.9016	0.2914	-0.5505	0.723	-2.9016	0.2914	-0.5505	0.723	3
Q8C398	Pigw	-0.6672	0.2001	-0.349	-0.4542	-0.6672	0.2001	-0.349	-0.4542	3
Q8C3X2	Ccdc90b	0.2117	0.5596	1.1817	0.6225	0.2117	0.5596	1.1817	0.6225	1
Q8C3X4	Guf1	0.1963	-0.4049	-0.7373	0.0679	0.1963	-0.4049	-0.7373	0.0679	2
Q8C3X8	Lmf2	-0.052	0.2218	0.2097	0.4595	-0.052	0.2218	0.2097	0.4595	1
Q8C407	Yipf4	-0.3443	-0.11	0.0017	-0.3484	-0.3443	-0.11	0.0017	-0.3484	3
Q8C4X2	Csnk1g3	0.8191	-0.8777	-0.461	1.5083	0.8191	-0.8777	-0.461	1.5083	4
Q8C522	Endod1	-1.3174	-0.0803	0.0009	-0.2414	-1.3174	-0.0803	0.0009	-0.2414	3
Q8C5H8	Nadk2	0.0753	-0.2051	-0.1991	-0.6646	0.0753	-0.2051	-0.1991	-0.6646	2
Q8C5Q4	Grsf1	-0.1169	-0.5544	0.362	-0.3357	-0.1169	-0.5544	0.362	-0.3357	3
Q8C5W0	Clmn	-0.4282	0.8892	-0.683	0.3259	-0.4282	0.8892	-0.683	0.3259	1
Q8C5W3	Tbcel	-0.0621	0.4217	-0.4033	-1.0321	-0.0621	0.4217	-0.4033	-1.0321	1
Q8C650	Septin10	-0.589	-0.8699	0.5164	0.505	-0.589	-0.8699	0.5164	0.505	3
Q8C729	Fam126b	-0.8545	-0.4166	-0.1757	-1.8504	-0.8545	-0.4166	-0.1757	-1.8504	2
Q8C767	Ppp1r3b	2.3255	-0.0508	2.1509	0.3211	2.3255	-0.0508	2.1509	0.3211	4
Q8C7E7	Stbd1	1.0659	2.2503	-2.0307	-0.6013	1.0659	2.2503	-2.0307	-0.6013	1
Q8C7G5	Apoa5	5.0538	2.0947	-1.1926	-0.3004	5.0538	2.0947	-1.1926	-0.3004	1
Q8C7H1	Mmaa	0.054	-0.2055	-0.0591	-1.0651	0.054	-0.2055	-0.0591	-1.0651	2
Q8C7V8	Ccdc134	-1.7753	-0.7411	0.4177	-0.3709	-1.7753	-0.7411	0.4177	-0.3709	3
Q8C7X2	Emc1	-0.0396	0.5242	0.2615	1.1676	-0.0396	0.5242	0.2615	1.1676	1
Q8C863	Itch	0.2721	0.2606	-0.7292	0.2928	0.2721	0.2606	-0.7292	0.2928	1
Q8CAK1	Iba57	0.0507	-0.1376	-0.3809	-1.1463	0.0507	-0.1376	-0.3809	-1.1463	2
Q8CAQ8	Immt	-0.9177	-0.24	-0.7914	-0.8378	-0.9177	-0.24	-0.7914	-0.8378	2
Q8CAS9	Parp9	0.627	1.4734	0.092	0.294	0.627	1.4734	0.092	0.294	1
Q8CAY6	Acat2	0.6398	-0.1657	-1.4845	-1.183	0.6398	-0.1657	-1.4845	-1.183	2
Q8CBR6	Tsku	1.1387	-0.3903	0.4474	2.4385	1.1387	-0.3903	0.4474	2.4385	4
Q8CBW3	Abi1	1.118	0.5019	3.7747	2.3165	1.118	0.5019	3.7747	2.3165	4
Q8CBY8	Dctn4	0.7459	0.9654	-1.4596	1.6312	0.7459	0.9654	-1.4596	1.6312	1
Q8CC21	Ttc19	0.4488	-0.5152	0.1373	1.3929	0.4488	-0.5152	0.1373	1.3929	4
Q8CC86	Naprt	0.0482	0.2185	-0.4268	-1.8681	0.0482	0.2185	-0.4268	-1.8681	2
Q8CC88	Vwa8	-0.541	0.3382	-0.2693	-0.7646	-0.541	0.3382	-0.2693	-0.7646	2
Q8CCH2	Nhlrc3	-2.1217	-0.9341	1.6747	2.3812	-2.1217	-0.9341	1.6747	2.3812	4
Q8CCJ3	Ufl1	0.3711	0.5167	-0.4346	0.1276	0.3711	0.5167	-0.4346	0.1276	1
Q8CD10	Micu2	0.3482	-0.4087	1.2803	-0.945	0.3482	-0.4087	1.2803	-0.945	3
Q8CD26	Slc35e1	-0.7329	1.0378	0.8666	0.0373	-0.7329	1.0378	0.8666	0.0373	4
Q8CDN6	Txnl1	0.197	0.1702	-0.6765	-1.8223	0.197	0.1702	-0.6765	-1.8223	2
Q8CEE7	Rdh13	-0.0205	1.6879	-0.309	-0.9256	-0.0205	1.6879	-0.309	-0.9256	1
Q8CFA2	Amt	0.5606	-0.139	-0.8064	-0.7593	0.5606	-0.139	-0.8064	-0.7593	2
Q8CFE4	Scyl2	0.6439	1.6167	0.6064	-1.5037	0.6439	1.6167	0.6064	-1.5037	1
Q8CFE6	Slc38a2	5.4817	2.4593	1.342	1.442	5.4817	2.4593	1.342	1.442	1
Q8CFI5	Pars2	0.897	-1.0156	1.5416	0.1072	0.897	-1.0156	1.5416	0.1072	4
Q8CFJ7	Slc25a45	-0.6575	-0.0338	0.472	-0.0808	-0.6575	-0.0338	0.472	-0.0808	3
Q8CFX1	H6pd	0.6062	0.5781	0.2741	1.4814	0.6062	0.5781	0.2741	1.4814	1
Q8CFZ5	Slc22a12	-1.2701	1.1344	-1.2224	0.0622	-1.2701	1.1344	-1.2224	0.0622	1
Q8CG14	C1sa	3.661	2.5516	-0.7616	-0.2707	3.661	2.5516	-0.7616	-0.2707	1
Q8CG16	C1ra	2.3697	1.0838	0.0325	1.0695	2.3697	1.0838	0.0325	1.0695	1
Q8CG50	Rab43	1.1407	1.1103	-0.2967	0.3618	1.1407	1.1103	-0.2967	0.3618	1
Q8CG76	Akr7a2	0.6021	0.4104	-2.6484	-1.4334	0.6021	0.4104	-2.6484	-1.4334	2
Q8CGB6	Tns2	-1.5087	1.3868	0.3431	3.2109	-1.5087	1.3868	0.3431	3.2109	4
Q8CGC7	Eprs	-0.4668	-0.775	-0.2678	-3.2456	-0.4668	-0.775	-0.2678	-3.2456	2
Q8CGF5	Tmem56	-0.1852	0.7137	0.3245	1.611	-0.1852	0.7137	0.3245	1.611	4
Q8CGK3	Lonp1	-0.4335	0.1712	-0.8396	-1.1651	-0.4335	0.1712	-0.8396	-1.1651	2
Q8CGP1	Hist1h2bk	-0.6219	-0.8046	-0.1826	-1.0499	-0.6219	-0.8046	-0.1826	-1.0499	3
Q8CGP2	Hist1h2bp	-0.5106	-0.8035	-0.2169	-1.1232	-0.5106	-0.8035	-0.2169	-1.1232	3
Q8CGP5	Hist1h2af	0.0848	-0.8297	-0.4624	-0.9058	0.0848	-0.8297	-0.4624	-0.9058	2
Q8CGP6	Hist1h2ah	0.1033	-0.7274	-0.4216	-0.7335	0.1033	-0.7274	-0.4216	-0.7335	2
Q8CGP7	Hist1h2ak	-0.0335	-0.9221	-0.397	-0.7596	-0.0335	-0.9221	-0.397	-0.7596	2
Q8CH40	Nudt6	0.2989	2.1133	2.2414	-0.3488	0.2989	2.1133	2.2414	-0.3488	1
Q8CHG3	Gcc2	-0.7358	-0.6504	0.5639	0.9341	-0.7358	-0.6504	0.5639	0.9341	3
Q8CHH9	Septin8	-0.9101	-0.8781	-0.215	0.7745	-0.9101	-0.8781	-0.215	0.7745	3
Q8CHK3	Mboat7	0.65	-0.0663	1.3639	0.9432	0.65	-0.0663	1.3639	0.9432	4
Q8CHQ9	Nat8f2	0.0931	0.4466	1.0617	0.7091	0.0931	0.4466	1.0617	0.7091	1
Q8CHR6	Dpyd	0.4833	-0.4586	-0.1095	-1.1646	0.4833	-0.4586	-0.1095	-1.1646	2
Q8CHS2	Dnajc22	-0.5896	-0.909	0.8232	0.7277	-0.5896	-0.909	0.8232	0.7277	3
Q8CHT0	Aldh4a1	0.0823	-0.4427	-0.658	-0.9593	0.0823	-0.4427	-0.658	-0.9593	2
Q8CI51	Pdlim5	0.443	1.1228	1.1793	-0.3533	0.443	1.1228	1.1793	-0.3533	1
Q8CI59	Steap3	-0.1045	0.6186	0.2585	-2.361	-0.1045	0.6186	0.2585	-2.361	2
Q8CI78	Rmnd1	-0.6777	-0.6035	0.9549	1.2731	-0.6777	-0.6035	0.9549	1.2731	4
Q8CI94	Pygb	-0.1818	-0.5226	-1.117	0.2233	-0.1818	-0.5226	-1.117	0.2233	2
Q8CIB5	Fermt2	0.4112	0.2767	2.7101	1.449	0.4112	0.2767	2.7101	1.449	4
Q8CIE6	Copa	-0.153	0.056	0.6014	-0.0202	-0.153	0.056	0.6014	-0.0202	3
Q8CIF4	Btd	1.402	0.4436	0.7344	2.4124	1.402	0.4436	0.7344	2.4124	1
Q8CIF6	Sidt2	-1.0567	0.4757	0.1104	-0.0645	-1.0567	0.4757	0.1104	-0.0645	4
Q8CIM7	Cyp2d26	-0.1593	0.4752	0.1088	0.8323	-0.1593	0.4752	0.1088	0.8323	1
Q8CIZ8	Vwf	-0.1656	-1.1349	1.1204	1.219	-0.1656	-1.1349	1.1204	1.219	4
Q8CIZ9	Nox1	-0.1998	0.0426	0.9171	1.6422	-0.1998	0.0426	0.9171	1.6422	4
Q8CJ40	Crocc	-4.8883	-1.0421	-1.3407	1.264	-4.8883	-1.0421	-1.3407	1.264	3
Q8CJG0	Ago2	0.0092	-0.5105	-0.381	0.071	0.0092	-0.5105	-0.381	0.071	2
Q8CJH3	Plxnb1	-1.1831	-1.9351	-0.9721	-1.4993	-1.1831	-1.9351	-0.9721	-1.4993	2
Q8JZK9	Hmgcs1	-0.6311	-1.3628	-0.4409	0.4087	-0.6311	-1.3628	-0.4409	0.4087	3
Q8JZN5	Acad9	-0.5274	-0.7269	0.9554	0.7371	-0.5274	-0.7269	0.9554	0.7371	3
Q8JZN7	Rhot2	-0.652	0.0742	-2.0967	-0.8929	-0.652	0.0742	-2.0967	-0.8929	2
Q8JZQ2	Afg3l2	-0.2546	-0.0237	-0.9833	-1.4503	-0.2546	-0.0237	-0.9833	-1.4503	2
Q8JZQ9	Eif3b	-0.2305	-1.1682	0.7808	-0.2761	-0.2305	-1.1682	0.7808	-0.2761	3
Q8JZR0	Acsl5	0.1091	0.2957	0.5795	0.647	0.1091	0.2957	0.5795	0.647	1
Q8JZS0	Lin7a	0.3154	-0.3572	0.1088	-0.86	0.3154	-0.3572	0.1088	-0.86	2
Q8JZU2	Slc25a1	-1.0074	-0.0168	0.8913	0.009	-1.0074	-0.0168	0.8913	0.009	3
Q8JZV9	Bdh2	1.0196	0.879	-1.9108	-0.4299	1.0196	0.879	-1.9108	-0.4299	1
Q8JZY4	Kiaa0391	-0.5489	-0.5398	0.5713	0.2525	-0.5489	-0.5398	0.5713	0.2525	3
Q8JZZ0	Ugt3a2	0.3113	0.1877	-0.0115	0.8967	0.3113	0.1877	-0.0115	0.8967	1
Q8JZZ7	Adgrl2	-0.8797	0.8006	-0.1819	-0.6744	-0.8797	0.8006	-0.1819	-0.6744	1
Q8K009	Aldh1l2	0.0575	-1.1367	0.4335	-1.499	0.0575	-1.1367	0.4335	-1.499	3
Q8K010	Oplah	1.1981	0.4823	-0.1344	-0.9715	1.1981	0.4823	-0.1344	-0.9715	1
Q8K021	Scamp1	-0.0907	1.1379	-1.7644	-0.8663	-0.0907	1.1379	-1.7644	-0.8663	2
Q8K0C4	Cyp51a1	-0.1184	-0.1635	0.8862	0.9274	-0.1184	-0.1635	0.8862	0.9274	4
Q8K0D2	Habp2	2.0179	-0.8075	0.0176	-0.0699	2.0179	-0.8075	0.0176	-0.0699	1
Q8K0D5	Gfm1	-0.6367	-0.7104	0.7228	-0.0393	-0.6367	-0.7104	0.7228	-0.0393	3
Q8K0E8	Fgb	1.5266	1.0543	-0.5068	0.0923	1.5266	1.0543	-0.5068	0.0923	1
Q8K0G5	Eipr1	0.019	0.7237	0.0792	-0.2152	0.019	0.7237	0.0792	-0.2152	1
Q8K0H1	Slc47a1	-1.9864	-1.4521	-1.1171	-0.2668	-1.9864	-1.4521	-1.1171	-0.2668	2
Q8K0L3	Acsm2	-0.9576	-1.9541	-1.0229	0.356	-0.9576	-1.9541	-1.0229	0.356	3
Q8K0R6	Gltpd2	0.129	0.1879	0.1045	0.0382	0.129	0.1879	0.1045	0.0382	1
Q8K0T0	Rtn1	0.0238	-0.2176	-0.12	0.7974	0.0238	-0.2176	-0.12	0.7974	4
Q8K0Z7	Taco1	-0.3327	-0.372	-0.7464	-1.3287	-0.3327	-0.372	-0.7464	-1.3287	2
Q8K124	Plekho2	-0.349	-1.4946	-1.1001	1.074	-0.349	-1.4946	-1.1001	1.074	3
[truncated: 1,243 more rows]

## Sheet: for cluster
Supplemental Table 7.The Qprot results for the comparison between time points. The results from t-SNE are showing in here. Show only the proteins that change in exercise.
Protein	Gene names	Zstatistic_leupeptin_ex_0_2	Zstatistic_leupeptine_sed_0_2	Zstatistic_saline_ex_0_2	Zstatistic_saline_sed_0_2	V1	V2	V3	V4	clusterNum	count_t1	count_t2	count
Q91WM6	Eva1a	1.9139	0.9645	1.6943	-1.8831	1.9139	0.9645	1.6943	-1.8831	1	2	2	2
Q8BVW3	Trim14	1.8644	0.9193	1.6154	0.8795	1.8644	0.9193	1.6154	0.8795	1	2	2	2
Q61234	Snta1	2.684	-4.028	2.9474	-0.5918	2.684	-4.028	2.9474	-0.5918	4	2	2	2
O70571	Pdk4	1.7934	0.4564	3.3543	0.8122	1.7934	0.4564	3.3543	0.8122	4	2	2	2
Q501J6	Ddx17	1.8173	-1.3244	2.3036	-0.3177	1.8173	-1.3244	2.3036	-0.3177	4	2	2	2
Q8C767	Ppp1r3b	2.3255	-0.0508	2.1509	0.3211	2.3255	-0.0508	2.1509	0.3211	4	2	2	2
Q8R4H2	Arhgef12	2.333	-0.6931	2.2414	0.0133	2.333	-0.6931	2.2414	0.0133	4	2	2	2
Q6P9Q6	Fkbp15	1.6243	-0.1089	2.7227	1.109	1.6243	-0.1089	2.7227	1.109	4	2	2	2
P62983	Rps27a	2.3162	1.0204	2.3058	1.3437	2.3162	1.0204	2.3058	1.3437	1	2	2	2
P0DP27	Calm2	2.512	0.9099	-0.1498	-1.6497	2.512	0.9099	-0.1498	-1.6497	1	2	1	1
Q8K4T3	Stradb	1.7902	-1.6172	0.27	0.0238	1.7902	-1.6172	0.27	0.0238	1	2	1	1
Q922Y1	Ubxn1	1.8192	0.6847	-1.9287	0.1927	1.8192	0.6847	-1.9287	0.1927	1	2	1	1
Q99M04	Lias	2.3169	-2.3434	-0.7586	-0.3558	2.3169	-2.3434	-0.7586	-0.3558	1	2	1	1
Q99MI1	Erc1	2.1383	0.2781	-2.4772	0.6394	2.1383	0.2781	-2.4772	0.6394	1	2	1	1
Q9D7X3	Dusp3	1.8396	0.5735	0.9736	-2.1858	1.8396	0.5735	0.9736	-2.1858	1	2	1	1
Q9QZB7	Actr10	2.8259	-1.532	-0.1198	-0.1974	2.8259	-1.532	-0.1198	-0.1974	1	2	1	1
O35382	Exoc4	2.3844	0.5235	0.368	0.1851	2.3844	0.5235	0.368	0.1851	1	2	1	1
O88746	Tom1	1.7512	0.6478	0.1507	-0.0546	1.7512	0.6478	0.1507	-0.0546	1	2	1	1
O89001	Cpd	2.5962	0.5378	-0.8404	0.6697	2.5962	0.5378	-0.8404	0.6697	1	2	1	1
P06909	Cfh	1.7258	0.5901	-0.028	0.5496	1.7258	0.5901	-0.028	0.5496	1	2	1	1
P07146	Prss2	2.0582	-0.6218	-0.4192	-0.1404	2.0582	-0.6218	-0.4192	-0.1404	1	2	1	1
P0DP28	Calm3	2.3657	0.9001	-0.0764	-1.4389	2.3657	0.9001	-0.0764	-1.4389	1	2	1	1
P11276	Fn1	1.8953	0.8287	0.823	0.6677	1.8953	0.8287	0.823	0.6677	1	2	1	1
P16330	Cnp	2.4223	0.1916	0.221	-0.3636	2.4223	0.1916	0.221	-0.3636	1	2	1	1
P18760	Cfl1	1.9917	0.3142	1.394	0.9502	1.9917	0.3142	1.394	0.9502	1	2	1	1
P28650	Adssl1	2.1696	-0.452	-0.0585	-0.2542	2.1696	-0.452	-0.0585	-0.2542	1	2	1	1
P29699	Ahsg	1.6234	0.5772	-0.7244	-0.5326	1.6234	0.5772	-0.7244	-0.5326	1	2	1	1
P31786	Dbi	1.9087	-0.3559	0.0223	0.9012	1.9087	-0.3559	0.0223	0.9012	1	2	1	1
P32261	Serpinc1	1.9542	0.6846	-0.2598	0.3997	1.9542	0.6846	-0.2598	0.3997	1	2	1	1
P39876	Timp3	2.0564	0.9797	0.716	-0.1046	2.0564	0.9797	0.716	-0.1046	1	2	1	1
P45878	Fkbp2	1.6695	0.6581	-0.8719	0.3602	1.6695	0.6581	-0.8719	0.3602	1	2	1	1
P47857	Pfkm	1.6167	-0.3608	-0.0305	0.339	1.6167	-0.3608	-0.0305	0.339	1	2	1	1
P55292	Dsc2	1.5496	0.9271	0.2831	-1.2306	1.5496	0.9271	0.2831	-1.2306	1	2	1	1
P56371	Rab4a	2.2993	-0.0983	-0.6165	0.9032	2.2993	-0.0983	-0.6165	0.9032	1	2	1	1
P58158	B3gat3	1.813	0.4348	-0.009	0.5498	1.813	0.4348	-0.009	0.5498	1	2	1	1
P61164	Actr1a	1.7612	-0.3778	-0.7649	-0.0377	1.7612	-0.3778	-0.7649	-0.0377	1	2	1	1
P61222	Abce1	1.744	-0.1689	0.1777	0.2544	1.744	-0.1689	0.1777	0.2544	1	2	1	1
P61961	Ufm1	1.7848	0.7396	-1.0084	0.0861	1.7848	0.7396	-1.0084	0.0861	1	2	1	1
P70297	Stam	2.6602	0.4492	-0.3707	0.4137	2.6602	0.4492	-0.3707	0.4137	1	2	1	1
P70697	Urod	1.7865	-0.084	-0.4132	-0.1643	1.7865	-0.084	-0.4132	-0.1643	1	2	1	1
Q3TL26	Tfb2m	1.5942	-0.3176	0.4494	0.4707	1.5942	-0.3176	0.4494	0.4707	1	2	1	1
Q3TNA1	Xylb	1.5466	-0.203	0.4279	-0.1414	1.5466	-0.203	0.4279	-0.1414	1	2	1	1
Q3UPH1	Prrc1	1.7363	-0.1545	0.6265	-1.0453	1.7363	-0.1545	0.6265	-1.0453	1	2	1	1
Q5I2A0	Serpina3g	1.95	0.4287	-0.1686	0.9459	1.95	0.4287	-0.1686	0.9459	1	2	1	1
Q61247	Serpinf2	1.5854	0.4479	0.0701	0.8041	1.5854	0.4479	0.0701	0.8041	1	2	1	1
Q61508	Ecm1	1.8291	0.5967	-0.0826	-1.3084	1.8291	0.5967	-0.0826	-1.3084	1	2	1	1
Q61510	Trim25	2.0618	0.3222	0.0494	0.0449	2.0618	0.3222	0.0494	0.0449	1	2	1	1
Q61581	Igfbp7	2.4579	0.5523	0.1598	-0.664	2.4579	0.5523	0.1598	-0.664	1	2	1	1
Q61702	Itih1	1.8626	-0.055	-1.0541	0.0266	1.8626	-0.055	-1.0541	0.0266	1	2	1	1
Q62009	Postn	2.428	-0.6137	-0.3028	0.9123	2.428	-0.6137	-0.3028	0.9123	1	2	1	1
Q64373	Bcl2l1	1.9383	-0.4559	1.0451	-0.3899	1.9383	-0.4559	1.0451	-0.3899	1	2	1	1
Q6DYE8	Enpp3	1.6332	-1.2566	0.0915	0.1959	1.6332	-1.2566	0.0915	0.1959	1	2	1	1
Q8BFS6	Cpped1	2.059	-0.2385	-0.1935	-0.0953	2.059	-0.2385	-0.1935	-0.0953	1	2	1	1
Q8BFZ3	Actbl2	2.6516	0.5165	0.8264	-0.9667	2.6516	0.5165	0.8264	-0.9667	1	2	1	1
Q8BHA3	Dtd2	1.5594	0.1034	0.2985	-1.1373	1.5594	0.1034	0.2985	-1.1373	1	2	1	1
Q8BWJ3	Phka2	2.0293	0.0859	0.5383	0.3228	2.0293	0.0859	0.5383	0.3228	1	2	1	1
Q8K0D2	Habp2	2.0179	-0.8075	0.0176	-0.0699	2.0179	-0.8075	0.0176	-0.0699	1	2	1	1
Q8K1I3	Spp2	2.2873	0.1603	0.6828	0.5067	2.2873	0.1603	0.6828	0.5067	1	2	1	1
Q8R0W6	Ndfip1	2.5915	0.9989	-0.027	0.9758	2.5915	0.9989	-0.027	0.9758	1	2	1	1
Q8VC28	Akr1c13	1.8543	0.8632	-0.4951	-0.8089	1.8543	0.8632	-0.4951	-0.8089	1	2	1	1
Q91X88	Pomgnt1	1.8302	-0.948	-0.6888	-0.4524	1.8302	-0.948	-0.6888	-0.4524	1	2	1	1
Q91ZX7	Lrp1	2.3875	0.9007	-0.3133	0.0967	2.3875	0.9007	-0.3133	0.0967	1	2	1	1
Q9CPW4	Arpc5	2.7404	0.9282	-0.5466	-0.8622	2.7404	0.9282	-0.5466	-0.8622	1	2	1	1
Q9CQU0	Txndc12	1.7217	0.153	0.2485	0.481	1.7217	0.153	0.2485	0.481	1	2	1	1
Q9CWK8	Snx2	1.7809	0.7792	-0.6384	-0.991	1.7809	0.7792	-0.6384	-0.991	1	2	1	1
Q9DAK9	Phpt1	1.8316	0.746	1.0753	-0.7122	1.8316	0.746	1.0753	-0.7122	1	2	1	1
Q9EST5	Anp32b	2.0599	0.6251	1.0746	-1.4314	2.0599	0.6251	1.0746	-1.4314	1	2	1	1
Q9JKY5	Hip1r	1.5864	-0.5123	-0.8947	0.0771	1.5864	-0.5123	-0.8947	0.0771	1	2	1	1
Q9QUH0	Glrx	1.8566	-0.0003	0.4075	-0.0531	1.8566	-0.0003	0.4075	-0.0531	1	2	1	1
Q9Z0R4	Itsn1	3.1295	0.8729	-0.3493	-0.146	3.1295	0.8729	-0.3493	-0.146	1	2	1	1
Q9Z1P8	Angptl4	3.9679	0.8832	0.3734	0.6584	3.9679	0.8832	0.3734	0.6584	1	2	1	1
O08573	Lgals9	3.2459	0.8336	-1.8573	-1.7494	3.2459	0.8336	-1.8573	-1.7494	2	2	1	1
O70492	Snx3	2.1392	0.7205	-3.3441	-1.7904	2.1392	0.7205	-3.3441	-1.7904	2	2	1	1
P83940	Eloc	2.1591	0.2789	-2.4871	-2.4982	2.1591	0.2789	-2.4871	-2.4982	2	2	1	1
Q8BLY2	Tarsl2	1.5745	-1.556	-0.9795	-1.8688	1.5745	-1.556	-0.9795	-1.8688	2	2	1	1
Q9JLZ8	Sigirr	2.5765	0.9092	-2.8006	-1.5999	2.5765	0.9092	-2.8006	-1.5999	2	2	1	1
P05201	Got1	1.6822	-0.101	-0.9445	-2.4942	1.6822	-0.101	-0.9445	-2.4942	2	2	1	1
Q04447	Ckb	1.7133	-1.7357	-1.2081	-1.2684	1.7133	-1.7357	-1.2081	-1.2684	2	2	1	1
Q60866	Pter	1.6121	-0.31	-1.2743	-3.5461	1.6121	-0.31	-1.2743	-3.5461	2	2	1	1
Q64374	Rgn	1.7416	0.0136	-0.064	-2.3197	1.7416	0.0136	-0.064	-2.3197	2	2	1	1
Q80VL1	Tdrkh	1.6949	-0.7023	-0.5603	-1.5392	1.6949	-0.7023	-0.5603	-1.5392	2	2	1	1
Q80WG5	Lrrc8a	1.6892	-0.4904	-2.2434	-0.3189	1.6892	-0.4904	-2.2434	-0.3189	2	2	1	1
Q8VBW8	Ttc36	1.9954	0.566	-1.3128	-3.4712	1.9954	0.566	-1.3128	-3.4712	2	2	1	1
Q8VCR7	Abhd14b	1.7254	0.6244	-2.0133	-1.1962	1.7254	0.6244	-2.0133	-1.1962	2	2	1	1
Q91X52	Dcxr	1.682	0.9109	-0.3812	-2.8357	1.682	0.9109	-0.3812	-2.8357	2	2	1	1
Q9CQ60	Pgls	1.5799	0.1574	-1.0882	-1.8806	1.5799	0.1574	-1.0882	-1.8806	2	2	1	1
Q9D8Y0	Efhd2	1.6685	0.9824	-0.7459	-3	1.6685	0.9824	-0.7459	-3	2	2	1	1
Q9DBJ1	Pgam1	1.5669	0.3662	-1.2093	-3.9374	1.5669	0.3662	-1.2093	-3.9374	2	2	1	1
Q9EQF5	Dpys	1.9979	0.7855	-1.1783	-2.437	1.9979	0.7855	-1.1783	-2.437	2	2	1	1
A2ADY9	Ddi2	1.9328	0.3575	-0.9333	-1.3417	1.9328	0.3575	-0.9333	-1.3417	2	2	1	1
O35737	Hnrnph1	1.6638	-0.2472	-1.1913	-1.0731	1.6638	-0.2472	-1.1913	-1.0731	2	2	1	1
P17742	Ppia	1.5943	0.6052	-1.0463	-1.1491	1.5943	0.6052	-1.0463	-1.1491	2	2	1	1
Q64324	Stxbp2	1.539	-0.3394	-0.7985	-1.1308	1.539	-0.3394	-0.7985	-1.1308	2	2	1	1
Q8BFW7	Lpp	1.6707	-0.2444	-0.583	-0.9639	1.6707	-0.2444	-0.583	-0.9639	2	2	1	1
Q3UQ44	Iqgap2	1.7577	0.6735	4.0662	1.957	1.7577	0.6735	4.0662	1.957	4	2	1	1
Q9JMG2	C1galt1c1	1.6926	-1.1171	0.8331	0.8872	1.6926	-1.1171	0.8331	0.8872	4	2	1	1
Q9Z2X1	Hnrnpf	1.6524	-1.4197	0.9753	0.2609	1.6524	-1.4197	0.9753	0.2609	4	2	1	1
P16301	Lcat	1.8324	0.2332	-2.0491	1.0105	1.8324	0.2332	-2.0491	1.0105	1	2	1	1
Q08879	Fbln1	3.508	1.4702	-0.6668	-1.9039	3.508	1.4702	-0.6668	-1.9039	1	2	1	1
Q8R317	Ubqln1	3.6514	1.3828	-0.7878	-1.9466	3.6514	1.3828	-0.7878	-1.9466	1	2	1	1
Q9ERB0	Snap29	2.1015	1.1731	0.9568	-1.5225	2.1015	1.1731	0.9568	-1.5225	1	2	1	1
Q9QXC1	Fetub	2.0955	-0.7517	-1.8775	1.4578	2.0955	-0.7517	-1.8775	1.4578	1	2	1	1
O70400	Pdlim1	2.9831	1.0493	0.1045	-0.5066	2.9831	1.0493	0.1045	-0.5066	1	2	1	1
O70570	Pigr	1.5766	1.1983	-0.2543	0.1906	1.5766	1.1983	-0.2543	0.1906	1	2	1	1
P04939	Mup3	2.0416	1.3065	0.5705	0.8738	2.0416	1.3065	0.5705	0.8738	1	2	1	1
P06728	Apoa4	2.6195	1.4377	0.1891	-1.0066	2.6195	1.4377	0.1891	-1.0066	1	2	1	1
P07214	Sparc	3.0327	1.1701	0.0858	-1.1836	3.0327	1.1701	0.0858	-1.1836	1	2	1	1
P11859	Agt	1.8949	1.2744	0.5101	0.5964	1.8949	1.2744	0.5101	0.5964	1	2	1	1
P12815	Pdcd6	1.5565	0.7374	1.2309	1.1902	1.5565	0.7374	1.2309	1.1902	1	2	1	1
P28654	Dcn	1.7842	1.313	0.3844	-0.4296	1.7842	1.313	0.3844	-0.4296	1	2	1	1
P55302	Lrpap1	1.6882	1.4601	-0.4268	0.0175	1.6882	1.4601	-0.4268	0.0175	1	2	1	1
Q00896	Serpina1c	1.7778	1.3566	0.3302	0.8243	1.7778	1.3566	0.3302	0.8243	1	2	1	1
Q06335	Aplp2	2.9402	1.3803	0.5254	0.2072	2.9402	1.3803	0.5254	0.2072	1	2	1	1
Q06890	Clu	2.5613	1.3899	0.1833	-0.0698	2.5613	1.3899	0.1833	-0.0698	1	2	1	1
Q60598	Cttn	1.5972	1.4252	1.1365	0.9236	1.5972	1.4252	1.1365	0.9236	1	2	1	1
Q64726	Azgp1	1.5813	0.9059	0.3908	1.3103	1.5813	0.9059	0.3908	1.3103	1	2	1	1
Q8BIJ7	Rufy1	2.8121	0.4956	1.431	1.1504	2.8121	0.4956	1.431	1.1504	1	2	1	1
Q8BL66	Eea1	2.6163	0.8612	0.447	1.4466	2.6163	0.8612	0.447	1.4466	1	2	1	1
Q8BYH7	Tbc1d17	2.5983	1.4559	1.1065	0.0139	2.5983	1.4559	1.1065	0.0139	1	2	1	1
Q8K0E8	Fgb	1.5266	1.0543	-0.5068	0.0923	1.5266	1.0543	-0.5068	0.0923	1	2	1	1
Q8K3K8	Optn	1.9228	1.3171	0.3817	-0.1236	1.9228	1.3171	0.3817	-0.1236	1	2	1	1
Q8R1S9	Slc38a4	1.6265	1.103	0.422	-1.3077	1.6265	1.103	0.422	-1.3077	1	2	1	1
Q8VCU1	Ces3b	2.0137	1.3395	0.3813	0.5717	2.0137	1.3395	0.3813	0.5717	1	2	1	1
Q99JY8	Plpp3	2.2772	1.2226	-0.0963	-1.2303	2.2772	1.2226	-0.0963	-1.2303	1	2	1	1
Q99KG5	Lsr	2.3385	1.4427	0.6717	-0.2869	2.3385	1.4427	0.6717	-0.2869	1	2	1	1
Q99KR8	Fuca2	1.8233	1.3046	0.5995	0.4643	1.8233	1.3046	0.5995	0.4643	1	2	1	1
Q9D920	Borcs5	2.5766	0.3808	0.283	1.3479	2.5766	0.3808	0.283	1.3479	1	2	1	1
Q9DBM0	Abcg8	2.6463	1.4469	-0.9365	0.8768	2.6463	1.4469	-0.9365	0.8768	1	2	1	1
Q9QUR6	Prep	1.7726	1.2958	0.3105	-1.2118	1.7726	1.2958	0.3105	-1.2118	1	2	1	1
Q9R0P5	Dstn	2.1141	1.3054	-0.6963	-0.8185	2.1141	1.3054	-0.6963	-0.8185	1	2	1	1
Q9Z108	Stau1	1.8042	1.0934	-0.2002	-0.6047	1.8042	1.0934	-0.2002	-0.6047	1	2	1	1
Q9Z1G4	Atp6v0a1	1.6179	1.3591	-1.1851	-0.712	1.6179	1.3591	-1.1851	-0.712	1	2	1	1
O55234	Psmb5	1.6843	1.0783	-2.3236	-2.0713	1.6843	1.0783	-2.3236	-2.0713	2	2	1	1
P97364	Sephs2	1.8955	1.0847	-1.8539	-2.0431	1.8955	1.0847	-1.8539	-2.0431	2	2	1	1
Q9CQM5	Txndc17	3.2193	1.0473	-1.7773	-3.1749	3.2193	1.0473	-1.7773	-3.1749	2	2	1	1
P16882	Ghr	2.5224	1.412	-8.5899	-0.7837	2.5224	1.412	-8.5899	-0.7837	2	2	1	1
P51885	Lum	2.3005	1.4378	-1.3914	-1.669	2.3005	1.4378	-1.3914	-1.669	2	2	1	1
Q62446	Fkbp3	1.7929	1.4204	-2.2325	-1.4796	1.7929	1.4204	-2.2325	-1.4796	2	2	1	1
Q9EQJ0	Tpcn1	2.3464	1.0455	-2.6694	-1.4891	2.3464	1.0455	-2.6694	-1.4891	2	2	1	1
Q62418	Dbnl	1.6816	0.6102	0.3409	1.5498	1.6816	0.6102	0.3409	1.5498	1	2	0	1
Q61549	Adgre1	1.5867	-0.6508	0.5786	1.7421	1.5867	-0.6508	0.5786	1.7421	4	2	0	1
P70274	Selenop	4.0973	1.4908	-0.6953	1.0436	4.0973	1.4908	-0.6953	1.0436	1	2	1	1
Q4PZA2	Ece1	3.829	1.2873	0.0051	1.0407	3.829	1.2873	0.0051	1.0407	1	2	1	1
Q8CG16	C1ra	2.3697	1.0838	0.0325	1.0695	2.3697	1.0838	0.0325	1.0695	1	2	1	1
Q8R1A4	Dock7	2.5489	1.3523	-0.9734	1.3593	2.5489	1.3523	-0.9734	1.3593	1	2	1	1
Q99P27	Pla2g12b	1.8642	1.1536	1.0943	1.0657	1.8642	1.1536	1.0943	1.0657	1	2	1	1
P01029	C4b	1.7739	1.2699	0.8948	1.9042	1.7739	1.2699	0.8948	1.9042	1	2	0	1
P97290	Serping1	2.5566	1.2556	0.7467	1.6441	2.5566	1.2556	0.7467	1.6441	1	2	0	1
Q63880	Ces3a	1.5164	1.3207	0.4643	1.5344	1.5164	1.3207	0.4643	1.5344	1	2	0	1
Q58A65	Spag9	1.9641	1.5415	2.484	0.5881	1.9641	1.5415	2.484	0.5881	1	1	2	1
Q9DCV3	Dgat2	1.8379	1.7061	2.1637	0.9325	1.8379	1.7061	2.1637	0.9325	1	1	2	1
Q9R182	Angptl3	4.3497	2.9689	1.7792	0.7363	4.3497	2.9689	1.7792	0.7363	1	1	2	1
P23116	Eif3a	1.18	0.1092	1.6853	-1.5548	1.18	0.1092	1.6853	-1.5548	1	1	2	1
Q8R050	Gspt1	0.6341	-0.2721	1.8897	-1.5308	0.6341	-0.2721	1.8897	-1.5308	1	1	2	1
Q8VC30	Tkfc	0.0964	0.4495	1.5965	-1.6104	0.0964	0.4495	1.5965	-1.6104	1	1	2	1
Q99KK7	Dpp3	0.9015	-0.0774	1.8485	-1.5619	0.9015	-0.0774	1.8485	-1.5619	1	1	2	1
Q9CZR2	Naalad2	-0.0428	-0.1893	2.3875	-1.7673	-0.0428	-0.1893	2.3875	-1.7673	1	1	2	1
P42703	Lifr	0.1895	0.8816	1.7458	-0.6268	0.1895	0.8816	1.7458	-0.6268	1	1	2	1
P49615	Cdk5	0.1865	0.9666	1.7093	-0.2895	0.1865	0.9666	1.7093	-0.2895	1	1	2	1
P70335	Rock1	0.0831	0.474	1.5475	-1.4504	0.0831	0.474	1.5475	-1.4504	1	1	2	1
Q64674	Srm	0.8052	0.7931	1.5052	-1.4043	0.8052	0.7931	1.5052	-1.4043	1	1	2	1
Q8BL97	Srsf7	0.6838	-0.0896	1.5659	-0.4602	0.6838	-0.0896	1.5659	-0.4602	1	1	2	1
Q8R0W0	Eppk1	-1.5	0.4451	1.5902	-0.0627	-1.5	0.4451	1.5902	-0.0627	1	1	2	1
Q8R2Y8	Ptrh2	0.0446	0.8456	1.5816	0.1243	0.0446	0.8456	1.5816	0.1243	1	1	2	1
Q8VD66	Abhd4	-1.029	0.555	2.0306	-0.5909	-1.029	0.555	2.0306	-0.5909	1	1	2	1
Q8VHQ9	Acot11	-0.6853	0.3621	1.59	-0.652	-0.6853	0.3621	1.59	-0.652	1	1	2	1
Q921M4	Golga2	-1.2296	0.5009	2.2288	-0.7005	-1.2296	0.5009	2.2288	-0.7005	1	1	2	1
Q9D662	Sec23b	0.3776	0.3783	1.5677	0.4168	0.3776	0.3783	1.5677	0.4168	1	1	2	1
Q9Z1M0	P2rx7	-0.1205	-1.6488	1.9408	-2.5835	-0.1205	-1.6488	1.9408	-2.5835	2	1	2	1
Q61233	Lcp1	-1.6461	-2.6466	1.8184	0.814	-1.6461	-2.6466	1.8184	0.814	3	1	2	1
O08528	Hk2	-1.3781	-1.6002	1.7193	0.6362	-1.3781	-1.6002	1.7193	0.6362	3	1	2	1
P06339	H2-T23	-0.1917	-1.6	2.5169	0.6513	-0.1917	-1.6	2.5169	0.6513	3	1	2	1
P42225	Stat1	-1.3754	-2.0675	1.5913	0.6202	-1.3754	-2.0675	1.5913	0.6202	3	1	2	1
Q07076	Anxa7	-0.3421	-2.4693	2.7681	0.1727	-0.3421	-2.4693	2.7681	0.1727	3	1	2	1
Q61490	Alcam	-0.573	-1.7095	2.0013	-1.496	-0.573	-1.7095	2.0013	-1.496	3	1	2	1
Q63961	Eng	-0.5514	-1.5672	2.314	0.7398	-0.5514	-1.5672	2.314	0.7398	3	1	2	1
Q64735	Cr1l	-2.003	-0.7314	1.5379	0.1316	-2.003	-0.7314	1.5379	0.1316	3	1	2	1
Q8R5M8	Cadm1	-0.9888	-1.8158	1.6126	0.6481	-0.9888	-1.8158	1.6126	0.6481	3	1	2	1
Q99JY3	Gimap4	-1.7175	-1.14	1.6134	0.3577	-1.7175	-1.14	1.6134	0.3577	3	1	2	1
Q99KC8	Vwa5a	-0.8552	-1.8047	1.8624	0.5177	-0.8552	-1.8047	1.8624	0.5177	3	1	2	1
Q9D3N8	Grtp1	-0.3695	-2.1119	2.2647	0.6693	-0.3695	-2.1119	2.2647	0.6693	3	1	2	1
P11714	Cyp2d9	-1.1635	-0.9749	1.5376	0.9262	-1.1635	-0.9749	1.5376	0.9262	3	1	2	1
P61982	Ywhag	-0.1814	-0.2358	1.7308	-0.4081	-0.1814	-0.2358	1.7308	-0.4081	3	1	2	1
P97379	G3bp2	-1.3602	-0.5392	2.6105	-1.3325	-1.3602	-0.5392	2.6105	-1.3325	3	1	2	1
Q60634	Flot2	-0.2011	-0.754	1.5679	0.3014	-0.2011	-0.754	1.5679	0.3014	3	1	2	1
Q60766	Irgm1	-1.4933	-0.8764	1.5519	0.7675	-1.4933	-0.8764	1.5519	0.7675	3	1	2	1
Q62293	Tgtp1	-1.4303	-1.2366	1.6237	0.0526	-1.4303	-1.2366	1.6237	0.0526	3	1	2	1
Q80SU7	Gvin1	-1.3372	-1.2073	2.3197	0.4368	-1.3372	-1.2073	2.3197	0.4368	3	1	2	1
Q99J39	Mlycd	-0.7832	-1.176	1.6831	0.9378	-0.7832	-1.176	1.6831	0.9378	3	1	2	1
Q99N91	Mrpl34	-0.7252	-1.3325	2.253	-1.4739	-0.7252	-1.3325	2.253	-1.4739	3	1	2	1
Q9D0L7	Armc10	-0.339	-1.0719	1.6861	-0.1675	-0.339	-1.0719	1.6861	-0.1675	3	1	2	1
Q9D1P4	Chordc1	-1.2211	-1.4208	1.8019	0.0251	-1.2211	-1.4208	1.8019	0.0251	3	1	2	1
Q9QZE5	Copg1	-0.3012	-0.5669	1.5272	-0.5402	-0.3012	-0.5669	1.5272	-0.5402	3	1	2	1
Q8BRK9	Man2a2	-1.8012	0.8565	2.4969	0.3255	-1.8012	0.8565	2.4969	0.3255	4	1	2	1
E9Q3C1	C2cd2	0.3503	0.0046	1.861	0.1539	0.3503	0.0046	1.861	0.1539	4	1	2	1
E9Q634	Myo1e	0.2004	-0.7236	2.0035	0.2706	0.2004	-0.7236	2.0035	0.2706	4	1	2	1
O08808	Diaph1	1.2925	-1.1629	2.4201	0.4904	1.2925	-1.1629	2.4201	0.4904	4	1	2	1
O55131	Septin7	-0.2079	-0.8718	1.9867	0.4219	-0.2079	-0.8718	1.9867	0.4219	4	1	2	1
O88456	Capns1	-0.4919	-0.6219	2.6754	0.2341	-0.4919	-0.6219	2.6754	0.2341	4	1	2	1
O88736	Hsd17b7	-0.4636	-0.1951	2.1094	0.6941	-0.4636	-0.1951	2.1094	0.6941	4	1	2	1
P01901	H2-K1	-0.1001	-1.0006	2.0215	0.4531	-0.1001	-1.0006	2.0215	0.4531	4	1	2	1
P02762	Mup6	0.9789	-0.1367	1.9824	0.6102	0.9789	-0.1367	1.9824	0.6102	4	1	2	1
P04938	Mup11	1.0861	-0.134	2.119	0.654	1.0861	-0.134	2.119	0.654	4	1	2	1
P19639	Gstm3	-0.3898	-0.8406	3.3069	-0.7996	-0.3898	-0.8406	3.3069	-0.7996	4	1	2	1
P20152	Vim	-0.3049	0.4749	1.7717	0.8366	-0.3049	0.4749	1.7717	0.8366	4	1	2	1
P24547	Impdh2	-0.4048	-0.2963	1.7902	0.5337	-0.4048	-0.2963	1.7902	0.5337	4	1	2	1
P28293	Ctsg	0.3793	-0.3127	2.0173	0.5699	0.3793	-0.3127	2.0173	0.5699	4	1	2	1
P29391	Ftl1	0.2072	-0.2838	2.0708	0.3276	0.2072	-0.2838	2.0708	0.3276	4	1	2	1
P40237	Cd82	0.2568	0.1722	1.6864	0.0837	0.2568	0.1722	1.6864	0.0837	4	1	2	1
P41233	Abca1	0.4014	-0.326	2.3772	0.5163	0.4014	-0.326	2.3772	0.5163	4	1	2	1
P43006	Slc1a2	0.188	0.1877	2.4841	-0.0934	0.188	0.1877	2.4841	-0.0934	4	1	2	1
P46735	Myo1b	-0.4383	0.0066	2.0752	0.0947	-0.4383	0.0066	2.0752	0.0947	4	1	2	1
P53811	Pitpnb	0.9971	-1.4117	2.5257	0.8067	0.9971	-1.4117	2.5257	0.8067	4	1	2	1
P58771	Tpm1	-0.3993	-0.3033	2.0945	0.9849	-0.3993	-0.3033	2.0945	0.9849	4	1	2	1
P62259	Ywhae	0.6325	0.5435	2.6268	0.3518	0.6325	0.5435	2.6268	0.3518	4	1	2	1
P62748	Hpcal1	-0.4308	-0.5715	1.8073	0.6026	-0.4308	-0.5715	1.8073	0.6026	4	1	2	1
P62996	Tra2b	-0.0833	0.3032	2.5157	0.5529	-0.0833	0.3032	2.5157	0.5529	4	1	2	1
P67871	Csnk2b	0.2138	-0.1275	1.5272	0.8929	0.2138	-0.1275	1.5272	0.8929	4	1	2	1
P80318	Cct3	0.6638	0.5136	2.672	0.2036	0.6638	0.5136	2.672	0.2036	4	1	2	1
P84084	Arf5	0.5348	0.8217	3.3224	0.7694	0.5348	0.8217	3.3224	0.7694	4	1	2	1
Q0GNC1	Inf2	-0.7254	-0.0969	2.2969	0.7365	-0.7254	-0.0969	2.2969	0.7365	4	1	2	1
Q5FW60	Mup20	-0.9424	0.6888	1.6611	0.8082	-0.9424	0.6888	1.6611	0.8082	4	1	2	1
Q5FWI3	Cemip2	-0.112	-1.1541	2.1545	0.4818	-0.112	-1.1541	2.1545	0.4818	4	1	2	1
Q61503	Nt5e	0.81	-0.396	1.6466	-0.104	0.81	-0.396	1.6466	-0.104	4	1	2	1
Q62448	Eif4g2	-0.1045	0.5995	1.7121	0.9199	-0.1045	0.5995	1.7121	0.9199	4	1	2	1
Q6P9J9	Ano6	-0.2645	0.3838	1.9626	0.0945	-0.2645	0.3838	1.9626	0.0945	4	1	2	1
Q6ZPE2	Sbf1	-0.7973	0.9431	1.9897	0.8879	-0.7973	0.9431	1.9897	0.8879	4	1	2	1
Q8BFY9	Tnpo1	0.4542	0.9847	3.6592	0.235	0.4542	0.9847	3.6592	0.235	4	1	2	1
Q8BGG9	Acnat2	-0.3441	-0.6209	2.1797	0.5681	-0.3441	-0.6209	2.1797	0.5681	4	1	2	1
Q8BT60	Cpne3	-0.9071	-0.2795	1.9103	0.3983	-0.9071	-0.2795	1.9103	0.3983	4	1	2	1
Q8BZ98	Dnm3	0.3214	-0.3305	1.7399	0.4814	0.3214	-0.3305	1.7399	0.4814	4	1	2	1
Q8CFI5	Pars2	0.897	-1.0156	1.5416	0.1072	0.897	-1.0156	1.5416	0.1072	4	1	2	1
Q8R0F9	Sec14l4	0.976	0.3486	1.9036	0.1783	0.976	0.3486	1.9036	0.1783	4	1	2	1
Q8R1K1	Ubac2	-0.3117	0.462	2.916	-0.7376	-0.3117	0.462	2.916	-0.7376	4	1	2	1
Q91WG0	Ces2c	0.6904	0.4346	1.8912	0.7781	0.6904	0.4346	1.8912	0.7781	4	1	2	1
Q91XL9	Osbpl1a	0.0335	0.6915	1.9783	0.4842	0.0335	0.6915	1.9783	0.4842	4	1	2	1
Q923B6	Steap4	-0.9818	0.07	1.7666	0.5315	-0.9818	0.07	1.7666	0.5315	4	1	2	1
Q99J47	Dhrs7b	-1.136	-0.181	1.643	0.7139	-1.136	-0.181	1.643	0.7139	4	1	2	1
Q9CX34	Sugt1	-0.065	0.2348	2.6425	0.5053	-0.065	0.2348	2.6425	0.5053	4	1	2	1
Q9CYA0	Creld2	0.5465	-0.2586	2.8725	0.8613	0.5465	-0.2586	2.8725	0.8613	4	1	2	1
Q9JJW0	Pxmp4	-0.8448	0.5713	1.5189	0.8225	-0.8448	0.5713	1.5189	0.8225	4	1	2	1
Q9QYB1	Clic4	-0.125	0.707	2.1886	0.9464	-0.125	0.707	2.1886	0.9464	4	1	2	1
Q9R0E2	Plod1	0.0253	-0.1369	2.115	0.6605	0.0253	-0.1369	2.115	0.6605	4	1	2	1
Q9WU19	Hao1	0.2588	0.0817	2.119	-0.4629	0.2588	0.0817	2.119	-0.4629	4	1	2	1
Q9WUH7	Sema4g	0.1703	-0.4743	1.7999	0.3143	0.1703	-0.4743	1.7999	0.3143	4	1	2	1
Q9Z2X8	Keap1	5.3514	4.2206	1.6663	1.1291	5.3514	4.2206	1.6663	1.1291	1	1	2	1
Q99JB8	Pacsin3	1.3025	1.2665	1.5866	0.4179	1.3025	1.2665	1.5866	0.4179	1	1	2	1
O08734	Bak1	-1.8911	-2.2375	2.2617	1.2738	-1.8911	-2.2375	2.2617	1.2738	3	1	2	1
P11928	Oas1a	-1.6387	-2.0128	1.6493	1.2266	-1.6387	-2.0128	1.6493	1.2266	3	1	2	1
Q64339	Isg15	-1.5059	-1.8169	1.6469	1.1608	-1.5059	-1.8169	1.6469	1.1608	3	1	2	1
Q8VCM5	Mul1	-1.7566	-2.7382	2.2132	1.1298	-1.7566	-2.7382	2.2132	1.1298	3	1	2	1
Q921M7	Fam49b	-1.835	-1.8173	2.1083	1.4942	-1.835	-1.8173	2.1083	1.4942	3	1	2	1
Q62426	Cstb	-1.6488	-0.5104	2.1072	1.0451	-1.6488	-0.5104	2.1072	1.0451	3	1	2	1
Q8BGF6	Elmod2	-0.3759	-1.6881	2.9938	1.0953	-0.3759	-1.6881	2.9938	1.0953	3	1	2	1
Q99KE1	Me2	-1.1134	-1.7066	1.8259	1.2149	-1.1134	-1.7066	1.8259	1.2149	3	1	2	1
Q9Z0L8	Ggh	-0.2237	-3.1246	1.5539	1.3502	-0.2237	-3.1246	1.5539	1.3502	3	1	2	1
A1L314	Mpeg1	-1.0924	-1.289	2.0965	1.1705	-1.0924	-1.289	2.0965	1.1705	3	1	2	1
P27612	Plaa	-0.9813	-0.5452	1.7004	1.0435	-0.9813	-0.5452	1.7004	1.0435	3	1	2	1
Q3KNM2	March5	-1.3471	-0.9327	1.9263	1.2284	-1.3471	-0.9327	1.9263	1.2284	3	1	2	1
Q8BJS4	Sun2	-1.8829	0.6637	1.6163	1.106	-1.8829	0.6637	1.6163	1.106	4	1	2	1
O35963	Rab33b	-0.1651	0.0699	1.7218	1.3381	-0.1651	0.0699	1.7218	1.3381	4	1	2	1
O54774	Ap3d1	-0.1107	-0.0158	2.6032	1.1184	-0.1107	-0.0158	2.6032	1.1184	4	1	2	1
P10639	Txn	0.2171	-1.1901	1.7075	1.435	0.2171	-1.1901	1.7075	1.435	4	1	2	1
P17225	Ptbp1	0.4009	-1.1453	2.2273	1.1864	0.4009	-1.1453	2.2273	1.1864	4	1	2	1
P42227	Stat3	0.0371	-0.0561	1.9614	1.4556	0.0371	-0.0561	1.9614	1.4556	4	1	2	1
P42567	Eps15	1.1827	0.5594	2.8492	1.1761	1.1827	0.5594	2.8492	1.1761	4	1	2	1
P47753	Capza1	-0.9448	-0.6192	2.7697	1.499	-0.9448	-0.6192	2.7697	1.499	4	1	2	1
P61211	Arl1	-0.2144	0.8077	2.0698	1.3444	-0.2144	0.8077	2.0698	1.3444	4	1	2	1
Q61584	Fxr1	1.0132	-0.1679	1.6705	1.3631	1.0132	-0.1679	1.6705	1.3631	4	1	2	1
Q6ZQ89	March6	0.5057	-0.6229	1.9675	1.4251	0.5057	-0.6229	1.9675	1.4251	4	1	2	1
Q8BKX1	Baiap2	0.8436	0.2263	1.9602	1.3383	0.8436	0.2263	1.9602	1.3383	4	1	2	1
Q8BSL7	Arf2	-0.0603	-0.1201	3.2935	1.3248	-0.0603	-0.1201	3.2935	1.3248	4	1	2	1
Q8BYC6	Taok3	0.6425	0.7082	2.8292	1.0275	0.6425	0.7082	2.8292	1.0275	4	1	2	1
Q8CIB5	Fermt2	0.4112	0.2767	2.7101	1.449	0.4112	0.2767	2.7101	1.449	4	1	2	1
Q8K386	Rab15	-0.2021	0.1197	1.7195	1.3104	-0.2021	0.1197	1.7195	1.3104	4	1	2	1
Q8R2Q8	Bst2	-0.0808	-0.7553	1.5058	1.1776	-0.0808	-0.7553	1.5058	1.1776	4	1	2	1
Q8VCW4	Unc93b1	-0.2462	-1.1401	1.6389	1.2345	-0.2462	-1.1401	1.6389	1.2345	4	1	2	1
Q8VD31	Tapbpl	-0.4342	-0.3108	1.7223	1.0678	-0.4342	-0.3108	1.7223	1.0678	4	1	2	1
Q91W98	Slc15a4	-0.0121	1.2617	1.8863	0.7711	-0.0121	1.2617	1.8863	0.7711	4	1	2	1
Q99K51	Pls3	1.0869	1.0487	2.6573	0.7958	1.0869	1.0487	2.6573	0.7958	4	1	2	1
Q99MB1	Tlr3	0.1699	1.0707	2.7451	0.7177	0.1699	1.0707	2.7451	0.7177	4	1	2	1
Q9D020	Nt5c3a	0.7417	-0.3437	2.5277	1.4707	0.7417	-0.3437	2.5277	1.4707	4	1	2	1
Q9EPC1	Parva	1.3681	-0.8845	1.8306	1.0856	1.3681	-0.8845	1.8306	1.0856	4	1	2	1
Q9EPT5	Slco2a1	0.9509	-0.5261	2.9075	1.4084	0.9509	-0.5261	2.9075	1.4084	4	1	2	1
Q9JKF1	Iqgap1	0.0409	-0.4394	1.8382	1.4865	0.0409	-0.4394	1.8382	1.4865	4	1	2	1
Q9WTK3	Gpaa1	-1.479	0.8112	1.6781	1.0833	-1.479	0.8112	1.6781	1.0833	4	1	2	1
Q9Z1Q2	Abhd16a	-1.0994	0.6644	1.7864	1.2726	-1.0994	0.6644	1.7864	1.2726	4	1	2	1
P97792	Cxadr	0.8262	1.6542	2.8633	-0.7505	0.8262	1.6542	2.8633	-0.7505	1	0	2	1
Q8CH40	Nudt6	0.2989	2.1133	2.2414	-0.3488	0.2989	2.1133	2.2414	-0.3488	1	0	2	1
P06797	Ctsl	2.0109	2.2213	3.8411	2.6037	2.0109	2.2213	3.8411	2.6037	1	1	1	0
P70280	Vamp7	2.1898	1.686	2.311	2.8433	2.1898	1.686	2.311	2.8433	1	1	1	0
Q61805	Lbp	2.9143	2.7263	2.478	2.2668	2.9143	2.7263	2.478	2.2668	1	1	1	0
Q9DCS1	Tmem176a	2.3637	2.0847	2.403	3.1848	2.3637	2.0847	2.403	3.1848	1	1	1	0
Q9QZ06	Tollip	2.6428	2.0962	3.2031	2.4419	2.6428	2.0962	3.2031	2.4419	1	1	1	0
P35951	Ldlr	3.2038	1.8064	-1.0215	-2.3227	3.2038	1.8064	-1.0215	-2.3227	1	1	1	0
Q6PCP5	Mff	1.7429	2.0156	0.1061	-1.5626	1.7429	2.0156	0.1061	-1.5626	1	1	1	0
E9Q414	Apob	7.0844	2.4369	0.3115	0.7012	7.0844	2.4369	0.3115	0.7012	1	1	1	0
O35988	Sdc4	4.4049	2.4718	0.449	0.9751	4.4049	2.4718	0.449	0.9751	1	1	1	0
O70404	Vamp8	2.6243	2.1243	-0.8846	0.9161	2.6243	2.1243	-0.8846	0.9161	1	1	1	0
P07759	Serpina3k	1.5873	1.7316	0.3799	0.9621	1.5873	1.7316	0.3799	0.9621	1	1	1	0
P08226	Apoe	4.8014	1.7518	0.3322	0.884	4.8014	1.7518	0.3322	0.884	1	1	1	0
P11983	Tcp1	1.6008	1.5787	0.7278	-0.6048	1.6008	1.5787	0.7278	-0.6048	1	1	1	0
P19221	F2	3.827	2.1087	-0.6609	-0.4453	3.827	2.1087	-0.6609	-0.4453	1	1	1	0
P27656	Lipc	3.821	2.3459	-1.3055	-0.5753	3.821	2.3459	-1.3055	-0.5753	1	1	1	0
P33587	Proc	1.6841	2.498	-1.3861	0.0119	1.6841	2.498	-1.3861	0.0119	1	1	1	0
P33622	Apoc3	2.3181	1.7497	-0.921	-0.4191	2.3181	1.7497	-0.921	-0.4191	1	1	1	0
P43883	Plin2	4.1807	3.2462	0.6509	0.872	4.1807	3.2462	0.6509	0.872	1	1	1	0
P48776	Tdo2	1.9663	1.7492	1.0795	0.8973	1.9663	1.7492	1.0795	0.8973	1	1	1	0
P97432	Nbr1	3.2583	2.0072	-0.8945	-0.8115	3.2583	2.0072	-0.8945	-0.8115	1	1	1	0
Q3U2C5	Rnf149	1.932	1.9893	-0.4983	-0.572	1.932	1.9893	-0.4983	-0.572	1	1	1	0
Q61337	Bad	1.6492	1.9508	0.2187	0.5344	1.6492	1.9508	0.2187	0.5344	1	1	1	0
Q61703	Itih2	3.7187	2.4263	-0.1366	0.607	3.7187	2.4263	-0.1366	0.607	1	1	1	0
Q62392	Phlda1	1.731	1.6642	-0.17	-0.4462	1.731	1.6642	-0.17	-0.4462	1	1	1	0
Q64337	Sqstm1	5.6787	2.3752	-1.1307	0.3152	5.6787	2.3752	-1.1307	0.3152	1	1	1	0
Q6PEM8	Slc46a1	1.8983	2.1007	0.6856	0.6494	1.8983	2.1007	0.6856	0.6494	1	1	1	0
Q80W65	Pcsk9	1.6948	2.0205	-0.3201	-0.7782	1.6948	2.0205	-0.3201	-0.7782	1	1	1	0
Q80WC7	Agfg2	2.1192	1.8363	0.514	0.3948	2.1192	1.8363	0.514	0.3948	1	1	1	0
Q8BHG1	Nrdc	1.8535	2.306	-0.323	0.4683	1.8535	2.306	-0.323	0.4683	1	1	1	0
Q8BYI8	Fam234b	2.7178	4.8292	-0.3671	-1.0684	2.7178	4.8292	-0.3671	-1.0684	1	1	1	0
Q8C7G5	Apoa5	5.0538	2.0947	-1.1926	-0.3004	5.0538	2.0947	-1.1926	-0.3004	1	1	1	0
Q8CG14	C1sa	3.661	2.5516	-0.7616	-0.2707	3.661	2.5516	-0.7616	-0.2707	1	1	1	0
Q8R395	Commd5	1.7379	1.5745	-0.0705	-0.2413	1.7379	1.5745	-0.0705	-0.2413	1	1	1	0
Q8VC19	Alas1	2.286	2.7158	0.2075	0.8309	2.286	2.7158	0.2075	0.8309	1	1	1	0
Q8VCM7	Fgg	1.9847	1.7135	-0.0375	0.625	1.9847	1.7135	-0.0375	0.625	1	1	1	0
Q99KN9	Clint1	1.5706	1.7881	-0.637	-1.0317	1.5706	1.7881	-0.637	-1.0317	1	1	1	0
Q99LI8	Hgs	8.447	2.0249	-0.5019	-0.4934	8.447	2.0249	-0.5019	-0.4934	1	1	1	0
Q99PE8	Abcg5	2.611	2.0163	-0.16	-1.2768	2.611	2.0163	-0.16	-1.2768	1	1	1	0
Q9CQ22	Lamtor1	2.5039	2.0404	-0.2239	-0.2994	2.5039	2.0404	-0.2239	-0.2994	1	1	1	0
Q9D898	Arpc5l	2.9273	1.5793	-1.4911	0.3294	2.9273	1.5793	-1.4911	0.3294	1	1	1	0
Q9DBI0	Tmprss6	1.556	2.078	0.2838	0.7283	1.556	2.078	0.2838	0.7283	1	1	1	0
Q9DBN1	Stra6l	1.7526	2.5694	0.6352	0.2482	1.7526	2.5694	0.6352	0.2482	1	1	1	0
Q9JHH6	Cpb2	1.8164	1.6446	0.0654	0.2472	1.8164	1.6446	0.0654	0.2472	1	1	1	0
Q9JKX3	Tfr2	4.8451	2.1933	0.0253	0.3784	4.8451	2.1933	0.0253	0.3784	1	1	1	0
Q9QXS1	Plec	1.6355	2.1285	0.1022	-0.1179	1.6355	2.1285	0.1022	-0.1179	1	1	1	0
Q9R0M6	Rab9a	2.8928	1.8881	-0.3355	-0.4703	2.8928	1.8881	-0.3355	-0.4703	1	1	1	0
Q9Z0U1	Tjp2	2.4671	2.1001	-0.817	-0.9747	2.4671	2.1001	-0.817	-0.9747	1	1	1	0
O35660	Gstm6	0.0564	-0.0417	1.415	-2.0613	0.0564	-0.0417	1.415	-2.0613	1	1	1	0
O35864	Cops5	0.3521	0.7613	-1.9569	0.6251	0.3521	0.7613	-1.9569	0.6251	1	1	1	0
P11152	Lpl	1.1831	0.8944	-1.7741	0.1485	1.1831	0.8944	-1.7741	0.1485	1	1	1	0
P16294	F9	0.99	0.6958	-1.5552	-0.6385	0.99	0.6958	-1.5552	-0.6385	1	1	1	0
P20918	Plg	0.9838	0.8903	-1.5654	-0.0154	0.9838	0.8903	-1.5654	-0.0154	1	1	1	0
P31649	Slc6a13	-0.4019	-0.073	1.3365	-1.8097	-0.4019	-0.073	1.3365	-1.8097	1	1	1	0
P34928	Apoc1	0.6501	0.0933	-1.5246	0.3233	0.6501	0.0933	-1.5246	0.3233	1	1	1	0
P56528	Cd38	0.4174	0.2026	-1.735	0.3943	0.4174	0.2026	-1.735	0.3943	1	1	1	0
P63325	Rps10	0.7413	0.5436	-1.6817	-0.1303	0.7413	0.5436	-1.6817	-0.1303	1	1	1	0
P70296	Pebp1	1.2277	0.5314	-1.6045	-0.6142	1.2277	0.5314	-1.6045	-0.6142	1	1	1	0
Q62433	Ndrg1	0.7934	0.4051	-1.7212	-0.1313	0.7934	0.4051	-1.7212	-0.1313	1	1	1	0
Q8C0L6	Paox	-1.7596	0.6086	-0.6095	0.8284	-1.7596	0.6086	-0.6095	0.8284	1	1	1	0
Q8JZV9	Bdh2	1.0196	0.879	-1.9108	-0.4299	1.0196	0.879	-1.9108	-0.4299	1	1	1	0
Q9DAW9	Cnn3	1.142	-0.0095	-1.6132	0.127	1.142	-0.0095	-1.6132	0.127	1	1	1	0
A2AJL3	Fggy	0.264	0.5123	-0.2078	-0.01	0.264	0.5123	-0.2078	-0.01	1	1	1	0
A2AN08	Ubr4	0.0699	0.7245	0.1318	-1.1623	0.0699	0.7245	0.1318	-1.1623	1	1	1	0
A2APV2	Fmnl2	0.4563	-0.1004	0.011	0.5402	0.4563	-0.1004	0.011	0.5402	1	1	1	0
A2ARV4	Lrp2	-1.0148	0.3456	-0.8451	0.7715	-1.0148	0.3456	-0.8451	0.7715	1	1	1	0
E9PVA8	Gcn1	0.4264	0.672	0.5169	0.0661	0.4264	0.672	0.5169	0.0661	1	1	1	0
E9Q4Z2	Acacb	0.7793	-0.2633	0.2809	0.3024	0.7793	-0.2633	0.2809	0.3024	1	1	1	0
O08997	Atox1	0.3001	0.1829	-0.8613	-0.2032	0.3001	0.1829	-0.8613	-0.2032	1	1	1	0
O09164	Sod3	1.017	0.4579	-0.752	-0.6561	1.017	0.4579	-0.752	-0.6561	1	1	1	0
O09167	Rpl21	0.1131	0.4413	-0.451	0.2721	0.1131	0.4413	-0.451	0.2721	1	1	1	0
O09172	Gclm	0.7064	0.9968	0.5383	-0.7917	0.7064	0.9968	0.5383	-0.7917	1	1	1	0
O35166	Gosr2	-0.0864	0.6282	-0.3065	0.439	-0.0864	0.6282	-0.3065	0.439	1	1	1	0
O35239	Ptpn9	0.1219	0.5659	1.4809	-0.816	0.1219	0.5659	1.4809	-0.816	1	1	1	0
O35286	Dhx15	0.5842	0.4719	1.4187	-0.3615	0.5842	0.4719	1.4187	-0.3615	1	1	1	0
O35381	Anp32a	0.9805	0.4908	0.4153	0.0401	0.9805	0.4908	0.4153	0.0401	1	1	1	0
O35387	Hax1	0.3883	0.9976	-0.3908	-1.1224	0.3883	0.9976	-0.3908	-1.1224	1	1	1	0
O35403	Sult3a1	-0.2122	0.2129	0.8417	-0.8136	-0.2122	0.2129	0.8417	-0.8136	1	1	1	0
O35423	Agxt	0.1565	0.1655	0.2346	-0.6962	0.1565	0.1655	0.2346	-0.6962	1	1	1	0
O35453	Hpn	1.0089	0.4146	-0.2326	0.328	1.0089	0.4146	-0.2326	0.328	1	1	1	0
O35609	Scamp3	-0.0421	0.4424	-0.1134	-0.6499	-0.0421	0.4424	-0.1134	-0.6499	1	1	1	0
O35887	Calu	0.0524	-0.1798	-0.1555	0.1215	0.0524	-0.1798	-0.1555	0.1215	1	1	1	0
O35945	Aldh1a7	0.351	0.4355	0.1036	-0.7295	0.351	0.4355	0.1036	-0.7295	1	1	1	0
O55023	Impa1	1.4864	-0.0201	0.247	-0.8491	1.4864	-0.0201	0.247	-0.8491	1	1	1	0
O55070	Dnase1l3	1.1119	0.5715	-0.0803	-0.504	1.1119	0.5715	-0.0803	-0.504	1	1	1	0
O55071	Cyp2b19	-0.3785	0.3663	1.2192	-0.9683	-0.3785	0.3663	1.2192	-0.9683	1	1	1	0
O55142	Rpl35a	-0.1126	0.6079	0.1065	0.8299	-0.1126	0.6079	0.1065	0.8299	1	1	1	0
O70378	Emc8	0.4706	0.2276	-0.8571	-0.3582	0.4706	0.2276	-0.8571	-0.3582	1	1	1	0
O70456	Sfn	0.8314	0.6346	1.0343	-0.0324	0.8314	0.6346	1.0343	-0.0324	1	1	1	0
O70480	Vamp4	0.9063	0.9339	1.0171	0.611	0.9063	0.9339	1.0171	0.611	1	1	1	0
O88342	Wdr1	1.1924	0.6529	1.1796	-0.1692	1.1924	0.6529	1.1796	-0.1692	1	1	1	0
O88441	Mtx2	-0.0836	0.5986	-0.1619	-0.7269	-0.0836	0.5986	-0.1619	-0.7269	1	1	1	0
O88451	Rdh7	0.12	0.5573	0.0471	0.869	0.12	0.5573	0.0471	0.869	1	1	1	0
O88587	Comt	0.6116	0.2853	0.5568	0.9879	0.6116	0.2853	0.5568	0.9879	1	1	1	0
O88792	F11r	0.1875	0.6531	0.5476	-0.4085	0.1875	0.6531	0.5476	-0.4085	1	1	1	0
O89079	Cope	0.2419	0.1651	-0.1364	0.1799	0.2419	0.1651	-0.1364	0.1799	1	1	1	0
P00186	Cyp1a2	0.1768	0.332	0.2599	0.1502	0.1768	0.332	0.2599	0.1502	1	1	1	0
P00687	Amy1	1.3333	-0.7617	-0.0007	0.2418	1.3333	-0.7617	-0.0007	0.2418	1	1	1	0
P01592	Jchain	0.6437	0.8788	-1.0032	-0.7384	0.6437	0.8788	-1.0032	-0.7384	1	1	1	0
P01633	Igk-V19-17	-0.2213	-0.1071	0.7849	-0.7894	-0.2213	-0.1071	0.7849	-0.7894	1	1	1	0
P06151	Ldha	0.0841	0.3567	-0.1986	-0.9198	0.0841	0.3567	-0.1986	-0.9198	1	1	1	0
P07309	Ttr	1.1576	0.3423	0.0481	0.6464	1.1576	0.3423	0.0481	0.6464	1	1	1	0
P07901	Hsp90aa1	-0.3924	0.2881	0.6497	-1.2023	-0.3924	0.2881	0.6497	-1.2023	1	1	1	0
P08003	Pdia4	0.1731	0.4003	0.0962	0.8367	0.1731	0.4003	0.0962	0.8367	1	1	1	0
P09528	Fth1	0.2785	0.0497	1.144	-0.4783	0.2785	0.0497	1.144	-0.4783	1	1	1	0
P11087	Col1a1	1.3004	0.982	0.5935	0.0548	1.3004	0.982	0.5935	0.0548	1	1	1	0
P11352	Gpx1	0.8809	0.0957	-0.051	0.1021	0.8809	0.0957	-0.051	0.1021	1	1	1	0
P11499	Hsp90ab1	-0.079	0.2545	0.7045	-0.6806	-0.079	0.2545	0.7045	-0.6806	1	1	1	0
P11589	Mup2	0.9867	0.5511	1.1881	0.6573	0.9867	0.5511	1.1881	0.6573	1	1	1	0
P12023	App	0.6794	0.4536	0.0359	-0.2351	0.6794	0.4536	0.0359	-0.2351	1	1	1	0
P12367	Prkar2a	0.3064	-0.0781	-0.1313	0.6629	0.3064	-0.0781	-0.1313	0.6629	1	1	1	0
P12790	Cyp2b9	0.3666	0.6743	-0.0689	0.3927	0.3666	0.6743	-0.0689	0.3927	1	1	1	0
P12791	Cyp2b10	0.1686	0.344	1.1565	0.7073	0.1686	0.344	1.1565	0.7073	1	1	1	0
P12970	Rpl7a	0.4997	0.585	-0.151	0.3133	0.4997	0.585	-0.151	0.3133	1	1	1	0
P13516	Scd1	1.278	0.2126	0.5563	-0.869	1.278	0.2126	0.5563	-0.869	1	1	1	0
P14115	Rpl27a	0.557	0.5751	-0.4337	-0.0672	0.557	0.5751	-0.4337	-0.0672	1	1	1	0
P14148	Rpl7	0.2376	0.5979	0.1516	0.7748	0.2376	0.5979	0.1516	0.7748	1	1	1	0
P14211	Calr	-0.0539	0.4481	-0.2443	0.6135	-0.0539	0.4481	-0.2443	0.6135	1	1	1	0
P14869	Rplp0	0.4027	0.2213	-0.2643	0.6157	0.4027	0.2213	-0.2643	0.6157	1	1	1	0
P14901	Hmox1	0.5699	0.0554	1.3287	-0.3121	0.5699	0.0554	1.3287	-0.3121	1	1	1	0
P15105	Glul	0.249	-0.106	-0.0057	-0.1587	0.249	-0.106	-0.0057	-0.1587	1	1	1	0
P15392	Cyp2a4	0.3992	0.4149	0.5669	0.492	0.3992	0.4149	0.5669	0.492	1	1	1	0
P16056	Met	0.1246	0.6858	0.4053	-0.0095	0.1246	0.6858	0.4053	-0.0095	1	1	1	0
P17563	Selenbp1	1.1103	0.8199	-0.4067	-1.078	1.1103	0.8199	-0.4067	-1.078	1	1	1	0
P17717	Ugt2b17	-0.1065	0.3634	0.3359	0.8852	-0.1065	0.3634	0.3359	0.8852	1	1	1	0
P18527	NoGeneName	0.3757	0.8249	-0.0112	0.2711	0.3757	0.8249	-0.0112	0.2711	1	1	1	0
P18581	Slc7a2	1.0942	-0.0916	1.313	-1.3648	1.0942	-0.0916	1.313	-1.3648	1	1	1	0
P20029	Hspa5	0.4524	0.4544	0.4389	0.788	0.4524	0.4544	0.4389	0.788	1	1	1	0
P22599	Serpina1b	1.2989	0.9412	0.1252	0.6092	1.2989	0.9412	0.1252	0.6092	1	1	1	0
P23953	Ces1c	0.6515	0.4208	-0.2573	0.3594	0.6515	0.4208	-0.2573	0.3594	1	1	1	0
P24270	Cat	0.4275	0.6666	-0.4783	0.2417	0.4275	0.6666	-0.4783	0.2417	1	1	1	0
P24369	Ppib	0.3672	0.5983	-1.1959	-0.1968	0.3672	0.5983	-1.1959	-0.1968	1	1	1	0
P24456	Cyp2d10	0.3435	0.8299	0.4968	0.8502	0.3435	0.8299	0.4968	0.8502	1	1	1	0
P24721	Asgr2	0.6196	0.0356	-1.4782	-0.3673	0.6196	0.0356	-1.4782	-0.3673	1	1	1	0
P25688	Uox	0.4098	0.1254	-0.0182	-0.239	0.4098	0.1254	-0.0182	-0.239	1	1	1	0
P26928	Mst1	0.7435	0.5452	0.1632	0.9576	0.7435	0.5452	0.1632	0.9576	1	1	1	0
P27659	Rpl3	0.1475	0.2265	-0.3084	0.5198	0.1475	0.2265	-0.3084	0.5198	1	1	1	0
P27773	Pdia3	0.321	0.4031	-0.4972	-0.0168	0.321	0.4031	-0.4972	-0.0168	1	1	1	0
P28656	Nap1l1	0.3971	-0.0935	-0.4526	-0.1647	0.3971	-0.0935	-0.4526	-0.1647	1	1	1	0
P30416	Fkbp4	0.656	0.332	-0.1617	-0.0639	0.656	0.332	-0.1617	-0.0639	1	1	1	0
P34927	Asgr1	0.8686	0.2246	-0.5577	-0.3768	0.8686	0.2246	-0.5577	-0.3768	1	1	1	0
P35283	Rab12	0.6864	0.3609	-1.3483	-0.1107	0.6864	0.3609	-1.3483	-0.1107	1	1	1	0
P35564	Canx	0.1067	0.2214	-0.074	0.5317	0.1067	0.2214	-0.074	0.5317	1	1	1	0
P35700	Prdx1	0.2715	0.1736	-0.3439	-0.2299	0.2715	0.1736	-0.3439	-0.2299	1	1	1	0
P35822	Ptprk	1.4524	0.8114	0.5745	-1.1606	1.4524	0.8114	0.5745	-1.1606	1	1	1	0
P35979	Rpl12	0.3728	0.3694	-1.0644	-0.4404	0.3728	0.3694	-1.0644	-0.4404	1	1	1	0
P35980	Rpl18	0.2082	0.3908	0.13	0.7273	0.2082	0.3908	0.13	0.7273	1	1	1	0
P37040	Por	0.1413	0.6241	-0.2277	0.3279	0.1413	0.6241	-0.2277	0.3279	1	1	1	0
P39054	Dnm2	0.4223	-0.0918	-0.0027	-0.3517	0.4223	-0.0918	-0.0027	-0.3517	1	1	1	0
P41105	Rpl28	-0.0185	0.0308	0.1593	-0.0177	-0.0185	0.0308	0.1593	-0.0177	1	1	1	0
P41216	Acsl1	0.1205	0.3033	0.0779	-0.0528	0.1205	0.3033	0.0779	-0.0528	1	1	1	0
P41317	Mbl2	0.6027	0.588	0.3365	0.719	0.6027	0.588	0.3365	0.719	1	1	1	0
P42932	Cct8	0.4736	0.6063	0.6488	-0.7133	0.4736	0.6063	0.6488	-0.7133	1	1	1	0
P46978	Stt3a	0.0051	0.1055	0.1173	0.7636	0.0051	0.1055	0.1173	0.7636	1	1	1	0
P47911	Rpl6	0.196	0.3579	0.0379	0.5418	0.196	0.3579	0.0379	0.5418	1	1	1	0
P47962	Rpl5	0.3037	0.1392	0.1056	0.468	0.3037	0.1392	0.1056	0.468	1	1	1	0
P47963	Rpl13	0.2857	0.6516	-0.0033	0.2355	0.2857	0.6516	-0.0033	0.2355	1	1	1	0
P47964	Rpl36	0.1829	0.645	-0.4508	-0.2669	0.1829	0.645	-0.4508	-0.2669	1	1	1	0
P48678	Lmna	-0.5164	0.3152	0.943	-0.5388	-0.5164	0.3152	0.943	-0.5388	1	1	1	0
P48774	Gstm5	0.052	0.1693	-0.2193	-0.1636	0.052	0.1693	-0.2193	-0.1636	1	1	1	0
P49586	Pcyt1a	0.273	0.4375	-0.9767	-0.5659	0.273	0.4375	-0.9767	-0.5659	1	1	1	0
P49722	Psma2	0.212	0.4899	0.4333	0.4263	0.212	0.4899	0.4333	0.4263	1	1	1	0
P50285	Fmo1	-0.0937	0.505	0.2904	0.8369	-0.0937	0.505	0.2904	0.8369	1	1	1	0
P51150	Rab7a	-0.0552	0.455	0.3282	0.5463	-0.0552	0.455	0.3282	0.5463	1	1	1	0
P51655	Gpc4	0.7221	0.8234	1.22	0.6634	0.7221	0.8234	1.22	0.6634	1	1	1	0
P51910	Apod	1.1835	0.8493	0.3846	0.3775	1.1835	0.8493	0.3846	0.3775	1	1	1	0
P52019	Sqle	0.3547	-0.2294	-0.3018	0.7025	0.3547	-0.2294	-0.3018	0.7025	1	1	1	0
P53026	Rpl10a	0.3565	0.5149	-0.645	-0.0139	0.3565	0.5149	-0.645	-0.0139	1	1	1	0
P54751	St3gal1	0.3067	0.2032	0.6739	0.6597	0.3067	0.2032	0.6739	0.6597	1	1	1	0
P54822	Adsl	0.5723	0.0288	-0.567	-0.1903	0.5723	0.0288	-0.567	-0.1903	1	1	1	0
P54869	Hmgcs2	0.5896	0.3819	-0.7274	-0.2344	0.5896	0.3819	-0.7274	-0.2344	1	1	1	0
P56395	Cyb5a	0.0865	0.2456	-0.355	0.06	0.0865	0.2456	-0.355	0.06	1	1	1	0
P56593	Cyp2a12	0.0779	0.557	0.7642	0.6891	0.0779	0.557	0.7642	0.6891	1	1	1	0
P56654	Cyp2c37	-0.2013	0.6093	-0.1686	0.8063	-0.2013	0.6093	-0.1686	0.8063	1	1	1	0
P56656	Cyp2c39	0.3852	0.7966	-0.1699	0.6606	0.3852	0.7966	-0.1699	0.6606	1	1	1	0
P57759	Erp29	0.5907	0.8105	-1.2824	-0.2308	0.5907	0.8105	-1.2824	-0.2308	1	1	1	0
P58252	Eef2	0.0164	0.1171	-0.3348	0.1827	0.0164	0.1171	-0.3348	0.1827	1	1	1	0
P58466	Ctdsp1	0.0894	0.7016	-0.3653	-0.6685	0.0894	0.7016	-0.3653	-0.6685	1	1	1	0
P58802	Tbc1d10a	0.1366	0.4793	1.3568	0.6177	0.1366	0.4793	1.3568	0.6177	1	1	1	0
P59999	Arpc4	1.1412	0.1974	0.2166	0.2022	1.1412	0.1974	0.2166	0.2022	1	1	1	0
P61255	Rpl26	0.1568	0.5016	-0.213	0.372	0.1568	0.5016	-0.213	0.372	1	1	1	0
P61358	Rpl27	-0.1136	0.4274	0.1228	0.7866	-0.1136	0.4274	0.1228	0.7866	1	1	1	0
P61514	Rpl37a	0.2499	0.7801	-0.6914	-0.075	0.2499	0.7801	-0.6914	-0.075	1	1	1	0
P62137	Ppp1ca	0.0422	0.1454	0.6627	0.76	0.0422	0.1454	0.6627	0.76	1	1	1	0
P62331	Arf6	0.4007	0.666	1.3578	0.4497	0.4007	0.666	1.3578	0.4497	1	1	1	0
P62717	Rpl18a	0.1237	0.3728	0.18	0.803	0.1237	0.3728	0.18	0.803	1	1	1	0
P62743	Ap2s1	0.2719	0.9586	-0.9587	-0.1347	0.2719	0.9586	-0.9587	-0.1347	1	1	1	0
P62838	Ube2d2	0.4959	0.6434	-0.1836	-0.2247	0.4959	0.6434	-0.1836	-0.2247	1	1	1	0
P62900	Rpl31	0.0593	0.45	-0.2961	0.3672	0.0593	0.45	-0.2961	0.3672	1	1	1	0
P62911	Rpl32	0.3287	0.4818	-0.2667	0.4042	0.3287	0.4818	-0.2667	0.4042	1	1	1	0
P62918	Rpl8	0.1458	0.915	-0.0999	-0.0351	0.1458	0.915	-0.0999	-0.0351	1	1	1	0
P62962	Pfn1	1.2233	0.7136	0.4713	-0.0558	1.2233	0.7136	0.4713	-0.0558	1	1	1	0
P63005	Pafah1b1	0.2885	0.3506	-0.7136	0.4941	0.2885	0.3506	-0.7136	0.4941	1	1	1	0
P63037	Dnaja1	0.2882	0.8161	0.2873	-0.1731	0.2882	0.8161	0.2873	-0.1731	1	1	1	0
P63158	Hmgb1	1.0564	0.9927	-1.1245	-0.8874	1.0564	0.9927	-1.1245	-0.8874	1	1	1	0
P63242	Eif5a	0.3222	0.6047	-0.5031	-0.1914	0.3222	0.6047	-0.5031	-0.1914	1	1	1	0
P63330	Ppp2ca	0.4441	0.6064	0.9983	0.05	0.4441	0.6064	0.9983	0.05	1	1	1	0
P67984	Rpl22	0.2897	0.3424	-0.351	0.4343	0.2897	0.3424	-0.351	0.4343	1	1	1	0
P68254	Ywhaq	0.2088	0.2314	0.8199	0.3794	0.2088	0.2314	0.8199	0.3794	1	1	1	0
P70122	Sbds	0.4384	0.5866	-1.3682	-0.2351	0.4384	0.5866	-1.3682	-0.2351	1	1	1	0
P70168	Kpnb1	-0.7595	0.8151	-0.5711	-0.4446	-0.7595	0.8151	-0.5711	-0.4446	1	1	1	0
P70227	Itpr3	-0.3591	0.4951	-0.0135	0.7734	-0.3591	0.4951	-0.0135	0.7734	1	1	1	0
P70266	Pfkfb1	0.1192	0.7113	-0.1749	-0.4623	0.1192	0.7113	-0.1749	-0.4623	1	1	1	0
P70318	Tial1	1.4909	0.3815	0.7778	-0.7879	1.4909	0.3815	0.7778	-0.7879	1	1	1	0
P70336	Rock2	-0.0727	0.7877	-0.4011	-0.04	-0.0727	0.7877	-0.4011	-0.04	1	1	1	0
P70387	Hfe	0.6552	0.2042	0.5128	0.2109	0.6552	0.2042	0.5128	0.2109	1	1	1	0
P70389	Igfals	1.0603	0.9641	0.9212	0.4693	1.0603	0.9641	0.9212	0.4693	1	1	1	0
P70398	Usp9x	0.4415	0.0358	-0.494	0.16	0.4415	0.0358	-0.494	0.16	1	1	1	0
P80313	Cct7	0.9417	0.5843	1.4388	-0.1342	0.9417	0.5843	1.4388	-0.1342	1	1	1	0
P80314	Cct2	0.5533	0.2031	1.1413	-0.2879	0.5533	0.2031	1.1413	-0.2879	1	1	1	0
P80316	Cct5	0.8994	0.6758	0.662	-0.3946	0.8994	0.6758	0.662	-0.3946	1	1	1	0
P84099	Rpl19	0.1997	0.8804	-0.0319	0.265	0.1997	0.8804	-0.0319	0.265	1	1	1	0
P97461	Rps5	1.2015	-0.4985	0.061	0.9063	1.2015	-0.4985	0.061	0.9063	1	1	1	0
P97819	Pla2g6	0.7473	-0.5138	0.1478	0.5338	0.7473	-0.5138	0.1478	0.5338	1	1	1	0
P97823	Lypla1	0.6142	0.1902	-0.5646	-0.7177	0.6142	0.1902	-0.5646	-0.7177	1	1	1	0
P97855	G3bp1	0.5122	0.0272	1.4194	-0.9472	0.5122	0.0272	1.4194	-0.9472	1	1	1	0
P99027	Rplp2	0.9568	0.8188	-0.8649	-0.8445	0.9568	0.8188	-0.8649	-0.8445	1	1	1	0
Q00560	Il6st	0.3134	0.6158	-0.479	-0.0785	0.3134	0.6158	-0.479	-0.0785	1	1	1	0
Q00898	Serpina1e	1.0745	0.1243	1.2916	0.3705	1.0745	0.1243	1.2916	0.3705	1	1	1	0
Q01149	Col1a2	0.6073	0.6514	-0.3939	-0.4248	0.6073	0.6514	-0.3939	-0.4248	1	1	1	0
Q01279	Egfr	1.0312	0.857	1.1123	0.2525	1.0312	0.857	1.1123	0.2525	1	1	1	0
Q01730	Rsu1	0.7699	0.5697	-0.2454	-0.3335	0.7699	0.5697	-0.2454	-0.3335	1	1	1	0
Q01853	Vcp	0.8273	0.0056	0.7043	-0.2162	0.8273	0.0056	0.7043	-0.2162	1	1	1	0
Q02105	C1qc	1.0342	-0.0577	0.6809	-0.0274	1.0342	-0.0577	0.6809	-0.0274	1	1	1	0
Q02819	Nucb1	1.0119	0.85	-0.723	0.2532	1.0119	0.85	-0.723	0.2532	1	1	1	0
Q06138	Cab39	0.2011	0.7183	0.8331	0.268	0.2011	0.7183	0.8331	0.268	1	1	1	0
Q07113	Igf2r	0.1747	0.4507	0.7492	0.0468	0.1747	0.4507	0.7492	0.0468	1	1	1	0
Q07456	Ambp	0.8496	0.5103	-0.41	0.9794	0.8496	0.5103	-0.41	0.9794	1	1	1	0
Q11011	Npepps	0.0365	0.504	0.5124	-0.2933	0.0365	0.504	0.5124	-0.2933	1	1	1	0
Q283N4	Urad	0.7124	0.032	0.2373	0.3777	0.7124	0.032	0.2373	0.3777	1	1	1	0
Q32Q92	Acot6	-0.262	0.6543	-0.0716	-0.0807	-0.262	0.6543	-0.0716	-0.0807	1	1	1	0
Q3TDQ1	Stt3b	-0.073	0.2154	0.1009	0.907	-0.073	0.2154	0.1009	0.907	1	1	1	0
Q3TFQ1	Spryd7	0.1808	0.037	-0.858	0.228	0.1808	0.037	-0.858	0.228	1	1	1	0
Q3THE2	Myl12b	1.0065	0.3292	-0.3297	0.3801	1.0065	0.3292	-0.3297	0.3801	1	1	1	0
Q3TYS2	Cybc1	0.5614	0.3511	0.965	0.8656	0.5614	0.3511	0.965	0.8656	1	1	1	0
Q3U1J4	Ddb1	0.3273	0.7365	0.8883	0.4954	0.3273	0.7365	0.8883	0.4954	1	1	1	0
Q3U2P1	Sec24a	0.0238	0.6164	0.4913	0.9778	0.0238	0.6164	0.4913	0.9778	1	1	1	0
Q3U3R4	Lmf1	0.1837	0.1748	0.1561	0.4937	0.1837	0.1748	0.1561	0.4937	1	1	1	0
Q3UFF7	Lyplal1	0.68	0.1722	-0.8051	-0.662	0.68	0.1722	-0.8051	-0.662	1	1	1	0
Q3UHG7	Lchn	0.8246	0.9772	-0.3665	-1.0514	0.8246	0.9772	-0.3665	-1.0514	1	1	1	0
Q3UMF0	Cobll1	0.9173	0.2038	-0.0173	-0.1903	0.9173	0.2038	-0.0173	-0.1903	1	1	1	0
Q3UN02	Lclat1	0.1453	0.2225	0.2499	0.6082	0.1453	0.2225	0.2499	0.6082	1	1	1	0
Q3UP75	Ugt3a1	-0.3044	0.8305	-0.0208	0.7357	-0.3044	0.8305	-0.0208	0.7357	1	1	1	0
Q3UQN2	Fcho2	-0.3813	0.6199	1.2528	-0.9889	-0.3813	0.6199	1.2528	-0.9889	1	1	1	0
Q3V0K9	Pls1	0.0348	0.8019	0.9365	0.2713	0.0348	0.8019	0.9365	0.2713	1	1	1	0
Q3V4B5	Commd6	1.0092	0.5464	-0.9322	0.9836	1.0092	0.5464	-0.9322	0.9836	1	1	1	0
Q499X9	Mars2	0.512	0.4796	1.1491	-0.4954	0.512	0.4796	1.1491	-0.4954	1	1	1	0
Q4VBD2	Tapt1	0.0474	0.6834	-0.2162	0.4364	0.0474	0.6834	-0.2162	0.4364	1	1	1	0
Q59J78	Ndufaf2	-0.798	0.563	-0.2642	-0.7921	-0.798	0.563	-0.2642	-0.7921	1	1	1	0
Q5HZI9	Slc25a51	-1.0336	0.4939	1.3259	-0.4635	-1.0336	0.4939	1.3259	-0.4635	1	1	1	0
Q5SWU9	Acaca	1.2026	0.6057	0.5479	-0.6497	1.2026	0.6057	0.5479	-0.6497	1	1	1	0
Q5SZA1	Slc17a2	0.3022	0.8411	0.9743	-0.3932	0.3022	0.8411	0.9743	-0.3932	1	1	1	0
Q5YD48	A1cf	1.1447	0.2218	-0.6217	-0.5406	1.1447	0.2218	-0.6217	-0.5406	1	1	1	0
Q60590	Orm1	0.3905	0.6279	0.1407	0.8152	0.3905	0.6279	0.1407	0.8152	1	1	1	0
Q60605	Myl6	0.7457	0.2463	-0.6165	-0.8384	0.7457	0.2463	-0.6165	-0.8384	1	1	1	0
Q60649	Clpb	0.2752	-0.0804	-0.2206	-0.0325	0.2752	-0.0804	-0.2206	-0.0325	1	1	1	0
Q60737	Csnk2a1	1.2245	0.0634	1.2054	0.8428	1.2245	0.0634	1.2054	0.8428	1	1	1	0
Q61147	Cp	0.4132	0.1699	-0.2824	0.7839	0.4132	0.1699	-0.2824	0.7839	1	1	1	0
Q61194	Pik3c2a	0.4574	-0.1167	-0.5452	-0.2521	0.4574	-0.1167	-0.5452	-0.2521	1	1	1	0
Q61206	Pafah1b2	-0.7345	0.4366	0.732	-0.694	-0.7345	0.4366	0.732	-0.694	1	1	1	0
Q61334	Bcap29	0.3333	0.9627	-0.417	0.7753	0.3333	0.9627	-0.417	0.7753	1	1	1	0
Q61409	Pde3b	0.3201	0.9272	-0.5362	-0.7824	0.3201	0.9272	-0.5362	-0.7824	1	1	1	0
Q61411	Hras	1.2906	0.0078	-0.2969	-0.6609	1.2906	0.0078	-0.2969	-0.6609	1	1	1	0
Q61542	Stard3	0.1227	0.6287	-0.6065	-0.3157	0.1227	0.6287	-0.6065	-0.3157	1	1	1	0
Q61578	Fdxr	0.7013	0.4956	-0.4537	-0.7221	0.7013	0.4956	-0.4537	-0.7221	1	1	1	0
Q61990	Pcbp2	0.3961	0.7496	0.1195	-0.3008	0.3961	0.7496	0.1195	-0.3008	1	1	1	0
Q62086	Pon2	0.3663	0.3872	0.0645	0.6262	0.3663	0.3872	0.0645	0.6262	1	1	1	0
Q62093	Srsf2	0.8925	0.4371	-0.4616	0.1416	0.8925	0.4371	-0.4616	0.1416	1	1	1	0
Q62167	Ddx3x	1.0233	-0.2826	0.1018	-0.3709	1.0233	-0.2826	0.1018	-0.3709	1	1	1	0
Q62351	Tfrc	0.3034	0.1575	-1.3932	-0.1725	0.3034	0.1575	-1.3932	-0.1725	1	1	1	0
Q62422	Ostf1	0.6124	0.9437	-0.4182	-0.5226	0.6124	0.9437	-0.4182	-0.5226	1	1	1	0
Q62452	Ugt1a9	0.0279	0.3793	0.3414	0.7989	0.0279	0.3793	0.3414	0.7989	1	1	1	0
Q63829	Commd3	1.1836	0.4062	-0.1752	-0.4765	1.1836	0.4062	-0.1752	-0.4765	1	1	1	0
Q63886	Ugt1a1	0.019	0.434	0.0674	0.7329	0.019	0.434	0.0674	0.7329	1	1	1	0
Q64487	Ptprd	-0.172	0.6223	-0.1493	0.5553	-0.172	0.6223	-0.1493	0.5553	1	1	1	0
Q66GT5	Ptpmt1	0.1922	0.5766	-0.8352	-0.2688	0.1922	0.5766	-0.8352	-0.2688	1	1	1	0
Q69ZR2	Hectd1	-0.237	0.2421	0.957	-0.6307	-0.237	0.2421	0.957	-0.6307	1	1	1	0
Q69ZZ6	Tmcc1	0.7679	0.1698	0.6336	-0.3326	0.7679	0.1698	0.6336	-0.3326	1	1	1	0
Q6GQT6	Scap	1.4817	-0.4116	-0.3145	-0.598	1.4817	-0.4116	-0.3145	-0.598	1	1	1	0
Q6GV12	Kdsr	-0.166	0.8165	0.4527	-0.7651	-0.166	0.8165	0.4527	-0.7651	1	1	1	0
Q6IFX2	Krt42	-0.0983	0.4576	-0.0665	-0.615	-0.0983	0.4576	-0.0665	-0.615	1	1	1	0
Q6IRU2	Tpm4	0.158	0.0142	-0.0925	-0.0412	0.158	0.0142	-0.0925	-0.0412	1	1	1	0
Q6IRU5	Cltb	1.2515	0.457	-0.4882	-0.6304	1.2515	0.457	-0.4882	-0.6304	1	1	1	0
Q6NZJ6	Eif4g1	-0.0347	0.6377	0.4725	0.701	-0.0347	0.6377	0.4725	0.701	1	1	1	0
Q6P069	Sri	0.3778	0.76	-0.448	-0.9901	0.3778	0.76	-0.448	-0.9901	1	1	1	0
Q6P3D0	Nudt16	0.6338	0.0989	-1.0261	-0.5671	0.6338	0.0989	-1.0261	-0.5671	1	1	1	0
Q6PA06	Atl2	0.6178	0.8719	-0.1618	0.2942	0.6178	0.8719	-0.1618	0.2942	1	1	1	0
Q6ZWV3	Rpl10	0.3477	0.6474	-0.7838	-0.1331	0.3477	0.6474	-0.7838	-0.1331	1	1	1	0
Q6ZWV7	Rpl35	0.0735	0.5806	-0.5852	-0.0947	0.0735	0.5806	-0.5852	-0.0947	1	1	1	0
Q70FJ1	Akap9	1.0409	0.167	-0.1716	-0.2426	1.0409	0.167	-0.1716	-0.2426	1	1	1	0
Q71LX4	Tln2	0.1928	-0.052	0.1181	0.4656	0.1928	-0.052	0.1181	0.4656	1	1	1	0
Q76MZ3	Ppp2r1a	0.6486	0.4157	0.9538	0.2386	0.6486	0.4157	0.9538	0.2386	1	1	1	0
Q78PY7	Snd1	0.5332	0.4048	-0.5958	-0.0269	0.5332	0.4048	-0.5958	-0.0269	1	1	1	0
Q7M6Y3	Picalm	-0.0252	0.0887	-0.5633	-0.2053	-0.0252	0.0887	-0.5633	-0.2053	1	1	1	0
Q7TMK9	Syncrip	0.0478	-0.0065	-0.0708	0.1442	0.0478	-0.0065	-0.0708	0.1442	1	1	1	0
Q7TNE1	Sugct	0.0865	0.1016	-0.3872	-0.0294	0.0865	0.1016	-0.3872	-0.0294	1	1	1	0
Q7TQI3	Otub1	1.0692	0.8418	0.7382	0.482	1.0692	0.8418	0.7382	0.482	1	1	1	0
Q80U72	Scrib	0.411	0.5577	1.2733	0.4438	0.411	0.5577	1.2733	0.4438	1	1	1	0
Q80UG1	Fads6	0.6289	0.9162	0.8749	0.6605	0.6289	0.9162	0.8749	0.6605	1	1	1	0
Q80UM7	Mogs	0.0462	0.5965	0.0207	0.6838	0.0462	0.5965	0.0207	0.6838	1	1	1	0
Q80UU9	Pgrmc2	0.1321	0.8924	-0.9997	-0.2879	0.1321	0.8924	-0.9997	-0.2879	1	1	1	0
Q80V03	Adck5	0.2035	0.9943	-0.1712	-0.6439	0.2035	0.9943	-0.1712	-0.6439	1	1	1	0
Q80VD1	Fam98b	-0.2283	0.4846	1.4996	-0.6637	-0.2283	0.4846	1.4996	-0.6637	1	1	1	0
Q80WQ2	Vac14	0.2918	0.6025	-0.0259	-0.122	0.2918	0.6025	-0.0259	-0.122	1	1	1	0
Q80WW9	Ddrgk1	0.1103	0.1913	-0.7103	0.0501	0.1103	0.1913	-0.7103	0.0501	1	1	1	0
Q80X80	C2cd2l	1.1784	0.6837	0.3507	0.9922	1.1784	0.6837	0.3507	0.9922	1	1	1	0
Q80X89	Ugt2a1	0.5779	0.9878	-0.5232	-0.2289	0.5779	0.9878	-0.5232	-0.2289	1	1	1	0
Q80X90	Flnb	0.8437	0.1821	0.0292	0.4066	0.8437	0.1821	0.0292	0.4066	1	1	1	0
Q80XL6	Acad11	-0.2322	0.4253	-0.3909	-0.0834	-0.2322	0.4253	-0.3909	-0.0834	1	1	1	0
Q80XN0	Bdh1	0.6823	0.2996	-0.655	-0.8177	0.6823	0.2996	-0.655	-0.8177	1	1	1	0
Q80YC5	F12	0.7603	0.4105	-1.3898	-0.6459	0.7603	0.4105	-1.3898	-0.6459	1	1	1	0
Q80YW0	Cyth4	-0.1824	0.7648	-0.0119	0.478	-0.1824	0.7648	-0.0119	0.478	1	1	1	0
Q80ZJ1	Rap2a	0.4981	0.3392	1.0815	-1.2152	0.4981	0.3392	1.0815	-1.2152	1	1	1	0
Q8BGB2	Ttc7a	0.3976	0.4638	-0.5432	-1.0153	0.3976	0.4638	-0.5432	-1.0153	1	1	1	0
Q8BGB8	Coq4	-0.6954	0.8308	-0.8654	0.2889	-0.6954	0.8308	-0.8654	0.2889	1	1	1	0
Q8BGY7	Fam210a	-0.7672	0.3868	0.2493	-0.9983	-0.7672	0.3868	0.2493	-0.9983	1	1	1	0
Q8BI84	Mia3	0.8678	0.4255	-0.2305	0.5695	0.8678	0.4255	-0.2305	0.5695	1	1	1	0
Q8BK64	Ahsa1	-0.3162	0.7955	0.8423	-1.0756	-0.3162	0.7955	0.8423	-1.0756	1	1	1	0
Q8BKC5	Ipo5	0.6855	0.9915	1.1249	-0.1298	0.6855	0.9915	1.1249	-0.1298	1	1	1	0
Q8BM72	Hspa13	0.0295	0.4826	0.5217	0.5678	0.0295	0.4826	0.5217	0.5678	1	1	1	0
Q8BP47	Nars	-0.0057	0.513	0.5982	-0.7726	-0.0057	0.513	0.5982	-0.7726	1	1	1	0
Q8BP67	Rpl24	0.4326	0.7624	-0.7575	-0.2835	0.4326	0.7624	-0.7575	-0.2835	1	1	1	0
Q8BRF7	Scfd1	0.3353	0.404	0.4489	0.4368	0.3353	0.404	0.4489	0.4368	1	1	1	0
Q8BSY0	Asph	0.3102	0.5446	-0.3014	0.0054	0.3102	0.5446	-0.3014	0.0054	1	1	1	0
Q8BU33	Ilvbl	0.2849	0.1686	-0.2212	0.9453	0.2849	0.1686	-0.2212	0.9453	1	1	1	0
Q8BUV3	Gphn	1.4139	-0.0145	-0.2372	0.6438	1.4139	-0.0145	-0.2372	0.6438	1	1	1	0
Q8BUY5	Timmdc1	0.8112	0.3995	-0.1691	-0.3818	0.8112	0.3995	-0.1691	-0.3818	1	1	1	0
Q8BWM0	Ptges2	0.2331	0.0255	0.0615	0.1783	0.2331	0.0255	0.0615	0.1783	1	1	1	0
Q8BWP8	B4gat1	0.3289	0.8195	0.5946	0.6303	0.3289	0.8195	0.5946	0.6303	1	1	1	0
Q8BWQ1	Ugt2a3	0.1763	0.5667	0.1895	0.6328	0.1763	0.5667	0.1895	0.6328	1	1	1	0
Q8BWS5	Gprin3	0.4073	-0.3011	-0.7632	0.8847	0.4073	-0.3011	-0.7632	0.8847	1	1	1	0
Q8BWY3	Etf1	0.4746	0.5303	0.0874	0.8151	0.4746	0.5303	0.0874	0.8151	1	1	1	0
Q8BX70	Vps13c	1.2455	0.4829	0.6838	0.8885	1.2455	0.4829	0.6838	0.8885	1	1	1	0
Q8BXA1	Golim4	0.1832	0.6531	0.1541	0.3842	0.1832	0.6531	0.1541	0.3842	1	1	1	0
Q8BYB9	Poglut1	0.4468	0.5375	-0.5471	-0.5502	0.4468	0.5375	-0.5471	-0.5502	1	1	1	0
Q8BYY4	Ttc39b	0.2727	0.5384	1.0217	0.4972	0.2727	0.5384	1.0217	0.4972	1	1	1	0
Q8C0N2	Gpat3	0.5587	0.8702	1.2694	-0.5272	0.5587	0.8702	1.2694	-0.5272	1	1	1	0
Q8C165	Pm20d1	0.6022	0.6599	-0.1289	0.2138	0.6022	0.6599	-0.1289	0.2138	1	1	1	0
Q8C3X2	Ccdc90b	0.2117	0.5596	1.1817	0.6225	0.2117	0.5596	1.1817	0.6225	1	1	1	0
Q8C3X8	Lmf2	-0.052	0.2218	0.2097	0.4595	-0.052	0.2218	0.2097	0.4595	1	1	1	0
Q8C5W0	Clmn	-0.4282	0.8892	-0.683	0.3259	-0.4282	0.8892	-0.683	0.3259	1	1	1	0
Q8C5W3	Tbcel	-0.0621	0.4217	-0.4033	-1.0321	-0.0621	0.4217	-0.4033	-1.0321	1	1	1	0
Q8C863	Itch	0.2721	0.2606	-0.7292	0.2928	0.2721	0.2606	-0.7292	0.2928	1	1	1	0
Q8CCJ3	Ufl1	0.3711	0.5167	-0.4346	0.1276	0.3711	0.5167	-0.4346	0.1276	1	1	1	0
Q8CHQ9	Nat8f2	0.0931	0.4466	1.0617	0.7091	0.0931	0.4466	1.0617	0.7091	1	1	1	0
Q8CIM7	Cyp2d26	-0.1593	0.4752	0.1088	0.8323	-0.1593	0.4752	0.1088	0.8323	1	1	1	0
Q8JZR0	Acsl5	0.1091	0.2957	0.5795	0.647	0.1091	0.2957	0.5795	0.647	1	1	1	0
Q8JZZ0	Ugt3a2	0.3113	0.1877	-0.0115	0.8967	0.3113	0.1877	-0.0115	0.8967	1	1	1	0
Q8JZZ7	Adgrl2	-0.8797	0.8006	-0.1819	-0.6744	-0.8797	0.8006	-0.1819	-0.6744	1	1	1	0
Q8K010	Oplah	1.1981	0.4823	-0.1344	-0.9715	1.1981	0.4823	-0.1344	-0.9715	1	1	1	0
Q8K0G5	Eipr1	0.019	0.7237	0.0792	-0.2152	0.019	0.7237	0.0792	-0.2152	1	1	1	0
Q8K0R6	Gltpd2	0.129	0.1879	0.1045	0.0382	0.129	0.1879	0.1045	0.0382	1	1	1	0
Q8K182	C8a	0.1171	-0.1161	-0.3614	0.1824	0.1171	-0.1161	-0.3614	0.1824	1	1	1	0
Q8K1X4	Nckap1l	1.3082	0.5777	0.3505	0.3953	1.3082	0.5777	0.3505	0.3953	1	1	1	0
Q8K201	Kct2	1.3653	-0.2745	0.0771	-0.1156	1.3653	-0.2745	0.0771	-0.1156	1	1	1	0
Q8K2C8	Gpat4	-0.0128	0.5759	0.8504	-0.8921	-0.0128	0.5759	0.8504	-0.8921	1	1	1	0
Q8K354	Cbr3	1.0032	0.4935	-0.8904	-0.5262	1.0032	0.4935	-0.8904	-0.5262	1	1	1	0
Q8K3W0	Babam2	0.4501	0.3207	0.6669	0.4243	0.4501	0.3207	0.6669	0.4243	1	1	1	0
Q8K4H1	Afmid	-0.2095	0.6724	-0.1464	-0.6949	-0.2095	0.6724	-0.1464	-0.6949	1	1	1	0
Q8R079	Bfar	0.9655	0.4776	-1.1994	-0.8364	0.9655	0.4776	-1.1994	-0.8364	1	1	1	0
Q8R0V5	Ido2	1.2215	0.6605	0.4513	-0.8658	1.2215	0.6605	0.4513	-0.8658	1	1	1	0
Q8R0Y8	Slc25a42	-0.3753	0.6554	-0.2362	-0.531	-0.3753	0.6554	-0.2362	-0.531	1	1	1	0
Q8R180	Ero1a	0.4984	-0.246	-0.574	0.7913	0.4984	-0.246	-0.574	0.7913	1	1	1	0
Q8R1G2	Cmbl	-0.007	0.279	0.0941	0.6239	-0.007	0.279	0.0941	0.6239	1	1	1	0
Q8R1T4	Slc35a3	0.099	0.1999	0.0297	0.6695	0.099	0.1999	0.0297	0.6695	1	1	1	0
Q8R1V4	Tmed4	0.1754	0.4982	0.2138	0.8112	0.1754	0.4982	0.2138	0.8112	1	1	1	0
Q8R1X6	Spart	-0.5722	0.9481	-0.7634	-0.244	-0.5722	0.9481	-0.7634	-0.244	1	1	1	0
Q8R2Y0	Abhd6	0.8611	0.7329	0.2706	0.922	0.8611	0.7329	0.2706	0.922	1	1	1	0
Q8R307	Vps18	1.3118	0.2456	0.5773	0.8851	1.3118	0.2456	0.5773	0.8851	1	1	1	0
Q8R3Q0	Saraf	0.8751	0.8172	1.4948	0.2483	0.8751	0.8172	1.4948	0.2483	1	1	1	0
Q8VC12	Uroc1	1.4502	0.7048	0.2816	-1.2417	1.4502	0.7048	0.2816	-1.2417	1	1	1	0
Q8VCC2	Ces1	0.2949	0.4468	0.2955	0.9279	0.2949	0.4468	0.2955	0.9279	1	1	1	0
Q8VCH7	Rdh10	-0.4832	0.6227	-0.1896	-0.1805	-0.4832	0.6227	-0.1896	-0.1805	1	1	1	0
Q8VCT3	Rnpep	-0.5952	0.4933	1.0617	-0.4819	-0.5952	0.4933	1.0617	-0.4819	1	1	1	0
Q8VCZ9	Prodh2	0.0272	0.2118	-0.1918	-0.6631	0.0272	0.2118	-0.1918	-0.6631	1	1	1	0
Q8VDQ1	Ptgr2	1.0385	0.2235	-0.8231	-0.2755	1.0385	0.2235	-0.8231	-0.2755	1	1	1	0
Q8VDZ4	Zdhhc5	-0.5285	0.0677	0.8729	-0.9293	-0.5285	0.0677	0.8729	-0.9293	1	1	1	0
Q8VE19	Mios	-0.5957	0.3893	0.6252	-0.5851	-0.5957	0.3893	0.6252	-0.5851	1	1	1	0
Q8VE96	Slc35f6	-0.0181	0.5467	1.3163	0.4963	-0.0181	0.5467	1.3163	0.4963	1	1	1	0
Q8VEK0	Tmem30a	0.4257	0.8193	0.0791	-0.8708	0.4257	0.8193	0.0791	-0.8708	1	1	1	0
Q8VHE0	Sec63	0.0113	0.3179	0.3773	0.5229	0.0113	0.3179	0.3773	0.5229	1	1	1	0
Q91V04	Tram1	-0.0413	0.6994	0.3283	0.0522	-0.0413	0.6994	0.3283	0.0522	1	1	1	0
Q91V61	Sfxn3	-0.5135	0.6394	0.0341	-1.1065	-0.5135	0.6394	0.0341	-1.1065	1	1	1	0
Q91VE0	Slc27a4	0.015	0.12	-0.1167	0.7098	0.015	0.12	-0.1167	0.7098	1	1	1	0
Q91VH2	Snx9	0.4245	0.7267	1.0245	0.1284	0.4245	0.7267	1.0245	0.1284	1	1	1	0
Q91VR5	Ddx1	0.49	0.4196	-1.305	-0.0124	0.49	0.4196	-1.305	-0.0124	1	1	1	0
Q91VW5	Golga4	-0.5447	0.5082	0.4842	-0.6943	-0.5447	0.5082	0.4842	-0.6943	1	1	1	0
Q91W86	Vps11	0.7553	0.044	-0.6227	0.962	0.7553	0.044	-0.6227	0.962	1	1	1	0
Q91WC9	Daglb	0.9673	0.8056	0.3258	-0.0552	0.9673	0.8056	0.3258	-0.0552	1	1	1	0
Q91WM2	Hdhd5	0.0093	-0.0159	0.0137	-0.1793	0.0093	-0.0159	0.0137	-0.1793	1	1	1	0
Q91X21	Kiaa2013	0.9332	0.5781	-1.4295	-0.7184	0.9332	0.5781	-1.4295	-0.7184	1	1	1	0
Q91X72	Hpx	0.1529	-0.0495	-0.1776	-0.0382	0.1529	-0.0495	-0.1776	-0.0382	1	1	1	0
Q91X77	Cyp2c50	0.5157	0.7649	0.5606	0.5831	0.5157	0.7649	0.5606	0.5831	1	1	1	0
Q91XD6	Vps36	1.0588	0.572	-0.1203	0.0343	1.0588	0.572	-0.1203	0.0343	1	1	1	0
Q91XE0	Glyat	0.6577	0.3734	-1.1366	-0.5639	0.6577	0.3734	-1.1366	-0.5639	1	1	1	0
Q91XT4	Sec16b	0.6494	0.6555	-0.5313	-0.8707	0.6494	0.6555	-0.5313	-0.8707	1	1	1	0
Q91YI4	Arrb2	1.0295	0.3781	-1.2474	0.4541	1.0295	0.3781	-1.2474	0.4541	1	1	1	0
Q91YJ2	Snx4	0.5926	0.6824	-0.7402	-0.3398	0.5926	0.6824	-0.7402	-0.3398	1	1	1	0
Q91YQ5	Rpn1	-0.0782	0.2431	0.0701	0.4469	-0.0782	0.2431	0.0701	0.4469	1	1	1	0
Q91YW3	Dnajc3	0.486	0.6696	0.0414	0.919	0.486	0.6696	0.0414	0.919	1	1	1	0
Q91YX5	Lpgat1	0.2212	0.8162	0.1795	0.8102	0.2212	0.8162	0.1795	0.8102	1	1	1	0
Q91Z92	B3galt6	-0.1163	0.9024	0.8132	0.5778	-0.1163	0.9024	0.8132	0.5778	1	1	1	0
Q920L1	Fads1	0.4794	0.5419	0.3913	0.2755	0.4794	0.5419	0.3913	0.2755	1	1	1	0
Q920Q4	Vps16	0.1	0.7648	0.5	0.967	0.1	0.7648	0.5	0.967	1	1	1	0
Q921X9	Pdia5	0.4553	0.245	-0.8093	0.4052	0.4553	0.245	-0.8093	0.4052	1	1	1	0
Q922D4	Ppp6r3	1.3175	0.5775	0.3096	-0.7641	1.3175	0.5775	0.3096	-0.7641	1	1	1	0
Q922D8	Mthfd1	0.3578	0.3767	-0.8088	-0.2807	0.3578	0.3767	-0.8088	-0.2807	1	1	1	0
Q922F4	Tubb6	-0.6424	0.4838	0.4123	-0.667	-0.6424	0.4838	0.4123	-0.667	1	1	1	0
Q922H4	Gmppa	-1.1513	0.3072	1.4895	-0.4045	-1.1513	0.3072	1.4895	-0.4045	1	1	1	0
Q922Q8	Lrrc59	0.4814	0.0103	-0.359	-0.2064	0.4814	0.0103	-0.359	-0.2064	1	1	1	0
Q923D2	Blvrb	0.5721	0.8409	-0.9556	0.9576	0.5721	0.8409	-0.9556	0.9576	1	1	1	0
Q925N0	Sfxn5	0.0974	0.1602	0.3433	-0.1362	0.0974	0.1602	0.3433	-0.1362	1	1	1	0
Q99J08	Sec14l2	0.5747	0.0362	1.3246	-0.5741	0.5747	0.0362	1.3246	-0.5741	1	1	1	0
Q99J23	Ghdc	0.7972	0.4653	-0.125	0.641	0.7972	0.4653	-0.125	0.641	1	1	1	0
Q99JT1	Gatb	0.6632	0.3782	-1.3595	0.2579	0.6632	0.3782	-1.3595	0.2579	1	1	1	0
Q99K48	Nono	0.9692	0.3966	-0.0608	-0.5525	0.9692	0.3966	-0.0608	-0.5525	1	1	1	0
Q99KW9	Itfg1	0.5149	0.5196	1.157	0.5416	0.5149	0.5196	1.157	0.5416	1	1	1	0
Q99LB2	Dhrs4	-0.1653	0.5142	-0.4149	-1.1886	-0.1653	0.5142	-0.4149	-1.1886	1	1	1	0
Q99LI2	Clcc1	0.3624	0.3409	-0.1207	0.9732	0.3624	0.3409	-0.1207	0.9732	1	1	1	0
Q99LM2	Cdk5rap3	0.1486	0.7836	0.0246	0.6878	0.1486	0.7836	0.0246	0.6878	1	1	1	0
Q99MP8	Brap	0.6923	-0.2029	-0.4272	0.6476	0.6923	-0.2029	-0.4272	0.6476	1	1	1	0
Q99PL5	Rrbp1	0.1979	0.222	-0.4703	-0.1425	0.1979	0.222	-0.4703	-0.1425	1	1	1	0
Q9CQ54	Ndufc2	0.0495	0.0629	0.0769	-0.4233	0.0495	0.0629	0.0769	-0.4233	1	1	1	0
Q9CQ69	Uqcrq	0.5716	-0.0644	0.6993	0.0179	0.5716	-0.0644	0.6993	0.0179	1	1	1	0
Q9CQ91	Ndufa3	-0.008	0.6083	-0.7852	-0.0165	-0.008	0.6083	-0.7852	-0.0165	1	1	1	0
Q9CQF4	NoGeneName	0.2701	0.7891	-0.8343	-0.5892	0.2701	0.7891	-0.8343	-0.5892	1	1	1	0
Q9CQH3	Ndufb5	0.0162	0.5671	0.6301	-0.1231	0.0162	0.5671	0.6301	-0.1231	1	1	1	0
Q9CQM9	Glrx3	0.7271	0.4244	0.2234	0.7572	0.7271	0.4244	0.2234	0.7572	1	1	1	0
Q9CQN7	Mrpl41	-0.2694	0.5581	-0.2692	-0.3882	-0.2694	0.5581	-0.2692	-0.3882	1	1	1	0
Q9CQT1	Mri1	0.9675	0.7572	0.238	-1.0543	0.9675	0.7572	0.238	-1.0543	1	1	1	0
Q9CQV8	Ywhab	0.6545	0.5493	1.4867	-0.0429	0.6545	0.5493	1.4867	-0.0429	1	1	1	0
Q9CQW3	Proz	0.6126	0.0425	-0.7458	-0.0627	0.6126	0.0425	-0.7458	-0.0627	1	1	1	0
Q9CQZ5	Ndufa6	0.6042	0.1328	-1.2937	-0.4196	0.6042	0.1328	-1.2937	-0.4196	1	1	1	0
Q9CR09	Ufc1	1.0717	0.5847	-0.0778	0.4986	1.0717	0.5847	-0.0778	0.4986	1	1	1	0
Q9CR57	Rpl14	0.0257	0.2606	0.1307	0.6264	0.0257	0.2606	0.1307	0.6264	1	1	1	0
Q9CRD0	Ociad1	0.1074	0.8087	0.5882	-0.7437	0.1074	0.8087	0.5882	-0.7437	1	1	1	0
Q9CWZ7	Napg	0.8582	0.7991	-1.4263	0.0961	0.8582	0.7991	-1.4263	0.0961	1	1	1	0
Q9CXI0	Coq5	0.2452	0.5641	0.3007	-0.3925	0.2452	0.5641	0.3007	-0.3925	1	1	1	0
Q9CXV1	Sdhd	-0.4949	0.7496	-0.2805	0.4266	-0.4949	0.7496	-0.2805	0.4266	1	1	1	0
Q9CXW4	Rpl11	0.4536	0.1219	-0.1906	0.3349	0.4536	0.1219	-0.1906	0.3349	1	1	1	0
Q9CY27	Tecr	0.0721	0.6961	-0.0026	0.6755	0.0721	0.6961	-0.0026	0.6755	1	1	1	0
Q9CY50	Ssr1	0.1976	0.3429	0.2749	0.9117	0.1976	0.3429	0.2749	0.9117	1	1	1	0
Q9CYH2	Prxl2a	-0.0878	0.2031	0.2465	0.6526	-0.0878	0.2031	0.2465	0.6526	1	1	1	0
Q9CYN2	Spcs2	-0.2288	0.5448	0.2492	0.6921	-0.2288	0.5448	0.2492	0.6921	1	1	1	0
Q9CZM2	Rpl15	0.0943	0.2945	0.1031	0.9178	0.0943	0.2945	0.1031	0.9178	1	1	1	0
Q9CZX7	Pip4p2	0.1891	0.0633	0.7317	-0.5857	0.1891	0.0633	0.7317	-0.5857	1	1	1	0
Q9CZX9	Emc4	0.1873	0.5399	0.1263	0.825	0.1873	0.5399	0.1263	0.825	1	1	1	0
Q9D024	Ccdc47	-0.0562	0.3581	0.2044	0.9534	-0.0562	0.3581	0.2044	0.9534	1	1	1	0
Q9D0R2	Tars	0.4447	0.1161	0.3231	-0.4623	0.4447	0.1161	0.3231	-0.4623	1	1	1	0
Q9D125	Mrps25	0.5214	0.7302	0.5062	-0.0183	0.5214	0.7302	0.5062	-0.0183	1	1	1	0
Q9D162	Ccdc167	0.5919	0.4433	0.6929	0.7428	0.5919	0.4433	0.6929	0.7428	1	1	1	0
Q9D1C8	Vps28	-0.1891	0.1853	0.7229	-0.7849	-0.1891	0.1853	0.7229	-0.7849	1	1	1	0
Q9D1G1	Rab1b	0.3997	0.4872	-0.5129	-0.778	0.3997	0.4872	-0.5129	-0.778	1	1	1	0
Q9D1G2	Pmvk	1.052	0.9542	-0.818	-0.9924	1.052	0.9542	-0.818	-0.9924	1	1	1	0
Q9D1G5	Lrrc57	-0.2231	0.8553	-0.6385	0.4261	-0.2231	0.8553	-0.6385	0.4261	1	1	1	0
Q9D1Q4	Dpm3	-0.0216	0.2573	-0.0549	0.8273	-0.0216	0.2573	-0.0549	0.8273	1	1	1	0
Q9D1Q6	Erp44	0.6592	0.4606	0.2161	0.8292	0.6592	0.4606	0.2161	0.8292	1	1	1	0
Q9D2N9	Vps33a	-0.0129	0.6769	0.031	0.5303	-0.0129	0.6769	0.031	0.5303	1	1	1	0
Q9D2R0	Aacs	0.7247	0.1811	0.3177	-0.4298	0.7247	0.1811	0.3177	-0.4298	1	1	1	0
Q9D338	Mrpl19	0.3217	0.4201	-0.2391	-0.6264	0.3217	0.4201	-0.2391	-0.6264	1	1	1	0
Q9D3B1	Hacd2	0.2111	0.439	0.3867	0.6646	0.2111	0.439	0.3867	0.6646	1	1	1	0
Q9D5J6	Shpk	0.2183	0.7887	-0.044	-0.6255	0.2183	0.7887	-0.044	-0.6255	1	1	1	0
Q9D8E6	Rpl4	0.3328	0.3665	0.0319	0.7662	0.3328	0.3665	0.0319	0.7662	1	1	1	0
Q9D8U8	Snx5	0.607	0.2375	0.4564	0.3102	0.607	0.2375	0.4564	0.3102	1	1	1	0
Q9D958	Spcs1	0.6254	0.5024	-0.1378	0.4004	0.6254	0.5024	-0.1378	0.4004	1	1	1	0
Q9DAV9	Tmem38b	0.1352	0.7725	0.0075	0.4614	0.1352	0.7725	0.0075	0.4614	1	1	1	0
Q9DB05	Napa	0.9851	0.1543	-0.259	0.2166	0.9851	0.1543	-0.259	0.2166	1	1	1	0
Q9DBB9	Cpn2	-0.0853	0.5935	-0.5536	-0.1907	-0.0853	0.5935	-0.5536	-0.1907	1	1	1	0
Q9DBG6	Rpn2	-0.0659	0.1037	0.2269	0.7872	-0.0659	0.1037	0.2269	0.7872	1	1	1	0
Q9DBM2	Ehhadh	0.4432	0.3132	-0.2357	0.0947	0.4432	0.3132	-0.2357	0.0947	1	1	1	0
Q9DBN5	Lonp2	-0.1637	0.1701	-0.3702	0.1293	-0.1637	0.1701	-0.3702	0.1293	1	1	1	0
Q9DBY1	Syvn1	-0.0687	0.4594	1.3609	0.8125	-0.0687	0.4594	1.3609	0.8125	1	1	1	0
Q9DCQ2	Aspdh	1.4678	0.7412	0.1831	0.5352	1.4678	0.7412	0.1831	0.5352	1	1	1	0
Q9DCS2	Mettl26	-0.274	0.7657	0.9167	-0.6532	-0.274	0.7657	0.9167	-0.6532	1	1	1	0
Q9DCS9	Ndufb10	0.1451	0.1292	0.227	-0.1272	0.1451	0.1292	0.227	-0.1272	1	1	1	0
Q9DCX8	Iyd	0.123	0.5887	0.4264	0.8766	0.123	0.5887	0.4264	0.8766	1	1	1	0
Q9DCY0	Keg1	0.2564	0.1114	-0.7118	-0.4436	0.2564	0.1114	-0.7118	-0.4436	1	1	1	0
Q9EP69	Sacm1l	-0.2271	0.248	0.1067	0.565	-0.2271	0.248	0.1067	0.565	1	1	1	0
Q9EP75	Cyp4f14	0.7446	0.2212	0.9146	0.7294	0.7446	0.2212	0.9146	0.7294	1	1	1	0
Q9EPK6	Sil1	0.8518	0.7512	0.6947	0.9499	0.8518	0.7512	0.6947	0.9499	1	1	1	0
Q9EPS3	Glce	0.6034	-0.162	0.1766	0.1651	0.6034	-0.162	0.1766	0.1651	1	1	1	0
Q9ER41	Tor1b	0.2374	0.11	0.133	-0.4299	0.2374	0.11	0.133	-0.4299	1	1	1	0
Q9ERR7	Selenof	0.7503	-0.0988	0.3897	-0.0488	0.7503	-0.0988	0.3897	-0.0488	1	1	1	0
Q9ESB3	Hrg	0.9649	-0.0809	-0.3086	0.5472	0.9649	-0.0809	-0.3086	0.5472	1	1	1	0
Q9ESP1	Sdf2l1	0.6925	0.6531	-0.4533	-0.058	0.6925	0.6531	-0.4533	-0.058	1	1	1	0
Q9JHI9	Slc40a1	0.052	0.6912	-0.3758	-0.3453	0.052	0.6912	-0.3758	-0.3453	1	1	1	0
Q9JJL3	Slco1b2	0.1048	0.165	0.169	-0.0929	0.1048	0.165	0.169	-0.0929	1	1	1	0
Q9JK38	Gnpnat1	0.4844	0.8328	0.1124	-0.1552	0.4844	0.8328	0.1124	-0.1552	1	1	1	0
Q9JKR6	Hyou1	0.6421	0.7149	0.4272	0.5863	0.6421	0.7149	0.4272	0.5863	1	1	1	0
Q9JLV1	Bag3	0.6525	-0.0737	-0.9173	-0.0637	0.6525	-0.0737	-0.9173	-0.0637	1	1	1	0
Q9JM76	Arpc3	0.6689	0.8582	-0.6098	-0.1586	0.6689	0.8582	-0.6098	-0.1586	1	1	1	0
Q9QWG7	Sult1b1	1.3137	0.814	-1.282	-0.0155	1.3137	0.814	-1.282	-0.0155	1	1	1	0
Q9QXT0	Cnpy2	0.6523	0.265	-0.3879	0.552	0.6523	0.265	-0.3879	0.552	1	1	1	0
Q9QYE6	Golga5	0.3397	0.2461	-0.9235	0.018	0.3397	0.2461	-0.9235	0.018	1	1	1	0
Q9QYF1	Rdh11	-0.3846	0.7092	0.7166	-1.1048	-0.3846	0.7092	0.7166	-1.1048	1	1	1	0
Q9QYR7	Acot3	0.7438	0.7436	-1.4707	-0.3238	0.7438	0.7436	-1.4707	-0.3238	1	1	1	0
Q9QYR9	Acot2	0.2111	-0.0844	-0.0622	0.3584	0.2111	-0.0844	-0.0622	0.3584	1	1	1	0
Q9QZ25	Vnn3	0.8148	0.0343	-0.1989	0.8644	0.8148	0.0343	-0.1989	0.8644	1	1	1	0
Q9QZD8	Slc25a10	-0.5336	0.5418	0.5014	-1.0115	-0.5336	0.5418	0.5014	-1.0115	1	1	1	0
Q9QZH6	Ecsit	0.2706	0.0911	-0.4925	-0.3756	0.2706	0.0911	-0.4925	-0.3756	1	1	1	0
Q9QZN4	Fbxo6	0.3591	-0.0132	0.6984	-0.993	0.3591	-0.0132	0.6984	-0.993	1	1	1	0
Q9R092	Hsd17b6	0.6652	0.2647	0.3428	0.8481	0.6652	0.2647	0.3428	0.8481	1	1	1	0
Q9R099	Tbl2	0.0345	0.2894	-0.3612	0.3594	0.0345	0.2894	-0.3612	0.3594	1	1	1	0
Q9R0N0	Galk1	-0.3298	0.7902	0.1275	-0.4325	-0.3298	0.7902	0.1275	-0.4325	1	1	1	0
Q9R0Q6	Arpc1a	0.3401	0.8963	-0.135	0.5001	0.3401	0.8963	-0.135	0.5001	1	1	1	0
Q9R0Q7	Ptges3	0.7408	0.6624	-0.8528	-0.4479	0.7408	0.6624	-0.8528	-0.4479	1	1	1	0
Q9R1S8	Capn7	0.5977	0.4746	-0.1774	0.4964	0.5977	0.4746	-0.1774	0.4964	1	1	1	0
Q9WTL7	Lypla2	0.4115	0.3661	0.8155	-0.8299	0.4115	0.3661	0.8155	-0.8299	1	1	1	0
Q9WU60	Atrn	0.692	0.093	-0.9184	-0.1049	0.692	0.093	-0.9184	-0.1049	1	1	1	0
Q9WUP4	Srd5a3	0.1841	0.4984	1.0062	-0.3866	0.1841	0.4984	1.0062	-0.3866	1	1	1	0
Q9WUP7	Uchl5	0.4632	0.6494	1.3566	-0.734	0.4632	0.6494	1.3566	-0.734	1	1	1	0
Q9WUR2	Eci2	0.3884	0.9359	0.3891	0.5718	0.3884	0.9359	0.3891	0.5718	1	1	1	0
Q9WUR9	Ak4	0.4838	0.0878	-0.7682	-0.1416	0.4838	0.0878	-0.7682	-0.1416	1	1	1	0
Q9WV85	Nme3	1.0547	0.9945	-0.1879	-0.1688	1.0547	0.9945	-0.1879	-0.1688	1	1	1	0
Q9Z0R6	Itsn2	0.9984	0.189	-0.0273	0.2648	0.9984	0.189	-0.0273	0.2648	1	1	1	0
Q9Z1Q9	Vars	1.0715	0.3561	0.226	0.3186	1.0715	0.3561	0.226	0.3186	1	1	1	0
Q9Z1Z0	Uso1	1.262	0.489	0.8174	0.4795	1.262	0.489	0.8174	0.4795	1	1	1	0
Q9Z2H5	Epb41l1	-0.4164	0.9957	0.1844	-0.7076	-0.4164	0.9957	0.1844	-0.7076	1	1	1	0
Q9Z2Q5	Mrpl40	1.2846	-0.4469	-0.1691	0.1143	1.2846	-0.4469	-0.1691	0.1143	1	1	1	0
P01869	Ighg1	0.0799	-1.5254	-3.2885	-1.6298	0.0799	-1.5254	-3.2885	-1.6298	2	1	1	0
P62814	Atp6v1b2	-1.776	-1.5805	-1.5869	-1.0252	-1.776	-1.5805	-1.5869	-1.0252	2	1	1	0
Q922Q4	Pycr2	-0.7369	-2.1992	-2.2949	-1.7212	-0.7369	-2.1992	-2.2949	-1.7212	2	1	1	0
Q99LE6	Abcf2	-1.5331	-0.1793	-2.5733	-2.4515	-1.5331	-0.1793	-2.5733	-2.4515	2	1	1	0
Q9BCZ4	Selenos	-2.1307	-1.7861	0.157	-2.2515	-2.1307	-1.7861	0.157	-2.2515	2	1	1	0
Q9DBX3	Susd2	-1.6483	-1.917	-0.6931	-1.5292	-1.6483	-1.917	-0.6931	-1.5292	2	1	1	0
Q9Z1N5	Ddx39b	-1.6306	-1.8092	0.7859	-2.0427	-1.6306	-1.8092	0.7859	-2.0427	2	1	1	0
O08585	Clta	-0.8025	0.1109	-2.0332	-2.4875	-0.8025	0.1109	-2.0332	-2.4875	2	1	1	0
O35386	Phyh	1.3984	0.4237	-2.4582	-1.5888	1.3984	0.4237	-2.4582	-1.5888	2	1	1	0
O35639	Anxa3	-1.1164	-1.7663	-0.0173	-2.2656	-1.1164	-1.7663	-0.0173	-2.2656	2	1	1	0
O55111	Dsg2	0.6816	0.8951	-1.6593	-4.0038	0.6816	0.8951	-1.6593	-4.0038	2	1	1	0
O70251	Eef1b	0.0953	-0.0643	-1.9157	-3.0498	0.0953	-0.0643	-1.9157	-3.0498	2	1	1	0
O70589	Cask	-2.2923	-1.6099	-0.4912	-0.4334	-2.2923	-1.6099	-0.4912	-0.4334	2	1	1	0
O88844	Idh1	-0.1797	0.0257	-2.2393	-2.0202	-0.1797	0.0257	-2.2393	-2.0202	2	1	1	0
P00375	Dhfr	0.8037	0.4734	-2.3693	-3.72	0.8037	0.4734	-2.3693	-3.72	2	1	1	0
P00920	Ca2	-1.3743	0.3757	-2.0982	-1.5453	-1.3743	0.3757	-2.0982	-1.5453	2	1	1	0
P01639	Gm5571	-1.9811	-0.3226	0.6726	-3.7048	-1.9811	-0.3226	0.6726	-3.7048	2	1	1	0
P09411	Pgk1	0.8496	0.4676	-2.335	-3.4622	0.8496	0.4676	-2.335	-3.4622	2	1	1	0
P11688	Itga5	-1.8714	-1.465	-0.8541	-2.5224	-1.8714	-1.465	-0.8541	-2.5224	2	1	1	0
P13020	Gsn	1.2031	-0.0116	-2.4073	-1.5603	1.2031	-0.0116	-2.4073	-1.5603	2	1	1	0
P16110	Lgals3	-3.957	-2.3324	-0.3157	-0.8589	-3.957	-2.3324	-0.3157	-0.8589	2	1	1	0
P16460	Ass1	0.5579	0.9523	-2.0176	-1.8772	0.5579	0.9523	-2.0176	-1.8772	2	1	1	0
P16858	Gapdh	0.27	0.6857	-2.6377	-2.6551	0.27	0.6857	-2.6377	-2.6551	2	1	1	0
P17182	Eno1	0.9832	0.4041	-2.343	-3.4815	0.9832	0.4041	-2.343	-3.4815	2	1	1	0
P21440	Abcb4	-1.5876	-0.4002	-0.6138	-2.0982	-1.5876	-0.4002	-0.6138	-2.0982	2	1	1	0
P40124	Cap1	-0.0415	-1.1452	-2.0006	-2.2394	-0.0415	-1.1452	-2.0006	-2.2394	2	1	1	0
P40142	Tkt	-0.3997	-0.5496	-1.5324	-2.0654	-0.3997	-0.5496	-1.5324	-2.0654	2	1	1	0
P47199	Cryz	0.8073	0.5583	-3.2709	-2.3753	0.8073	0.5583	-3.2709	-2.3753	2	1	1	0
P48758	Cbr1	0.7523	0.9219	-1.9492	-2.6245	0.7523	0.9219	-1.9492	-2.6245	2	1	1	0
P50516	Atp6v1a	-1.7727	-0.9805	-1.8396	-0.513	-1.7727	-0.9805	-1.8396	-0.513	2	1	1	0
P51830	Adcy9	-0.1516	-0.4897	-1.8875	-2.4937	-0.1516	-0.4897	-1.8875	-2.4937	2	1	1	0
P55284	Cdh5	0.7466	0.1442	-1.613	-1.5334	0.7466	0.1442	-1.613	-1.5334	2	1	1	0
P56382	Atp5f1e	-0.1936	0.5905	-2.5975	-1.8997	-0.1936	0.5905	-2.5975	-1.8997	2	1	1	0
P57776	Eef1d	0.7529	0.5278	-1.5778	-2.1565	0.7529	0.5278	-1.5778	-2.1565	2	1	1	0
P62827	Ran	0.1017	-0.5684	-1.6607	-1.9758	0.1017	-0.5684	-1.6607	-1.9758	2	1	1	0
P62843	Rps15	-0.1053	-1.1203	-3.1575	-1.5097	-0.1053	-1.1203	-3.1575	-1.5097	2	1	1	0
P63001	Rac1	-0.9859	-1.802	-1.3137	-2.0207	-0.9859	-1.802	-1.3137	-2.0207	2	1	1	0
P63038	Hspd1	0.1205	0.2535	-1.612	-1.7214	0.1205	0.2535	-1.612	-1.7214	2	1	1	0
P70349	Hint1	-0.0005	0.2187	-2.241	-2.9451	-0.0005	0.2187	-2.241	-2.9451	2	1	1	0
P97384	Anxa11	-0.8467	-1.7388	-0.2945	-1.7588	-0.8467	-1.7388	-0.2945	-1.7588	2	1	1	0
P97449	Anpep	-2.0652	-1.2298	-1.5166	-0.1809	-2.0652	-1.2298	-1.5166	-0.1809	2	1	1	0
P98203	Arvcf	0.0808	0.1386	-1.813	-1.5031	0.0808	0.1386	-1.813	-1.5031	2	1	1	0
P99029	Prdx5	1.1716	0.1678	-1.995	-1.9694	1.1716	0.1678	-1.995	-1.9694	2	1	1	0
Q05915	Gch1	0.2545	-0.432	-2.0172	-2.1105	0.2545	-0.432	-2.0172	-2.1105	2	1	1	0
Q06770	Serpina6	-0.4086	-3.0305	-2.1349	-0.8301	-0.4086	-3.0305	-2.1349	-0.8301	2	1	1	0
Q07968	F13b	0.2855	-2.3786	-1.4192	-1.6538	0.2855	-2.3786	-1.4192	-1.6538	2	1	1	0
Q3UJU9	Rmdn3	-0.5013	0.5122	-2.8223	-1.5286	-0.5013	0.5122	-2.8223	-1.5286	2	1	1	0
Q3UM45	Ppp1r7	-0.2196	-0.5069	-1.72	-1.5879	-0.2196	-0.5069	-1.72	-1.5879	2	1	1	0
Q3UV70	Pdp1	-4.5688	-0.8704	-0.0696	-1.8112	-4.5688	-0.8704	-0.0696	-1.8112	2	1	1	0
Q3V3R4	Itga1	-0.5787	-1.1989	-2.2454	-2.3529	-0.5787	-1.1989	-2.2454	-2.3529	2	1	1	0
Q571I9	Aldh16a1	0.6776	0.2342	-1.688	-2.7416	0.6776	0.2342	-1.688	-2.7416	2	1	1	0
Q60770	Stxbp3	-1.8672	-1.4585	-0.5604	-2.3701	-1.8672	-1.4585	-0.5604	-2.3701	2	1	1	0
Q60841	Reln	1.4524	-1.8726	-1.6194	0.2713	1.4524	-1.8726	-1.6194	0.2713	2	1	1	0
Q60864	Stip1	0.9264	-0.089	-2.2941	-5.22	0.9264	-0.089	-2.2941	-5.22	2	1	1	0
Q60994	Adipoq	-2.0644	-0.5062	-2.3738	-1.0244	-2.0644	-0.5062	-2.3738	-1.0244	2	1	1	0
Q64105	Spr	1.1162	0.3106	-2.137	-2.6697	1.1162	0.3106	-2.137	-2.6697	2	1	1	0
Q64442	Sord	0.2839	0.0291	-2.4207	-3.1002	0.2839	0.0291	-2.4207	-3.1002	2	1	1	0
Q64737	Gart	1.0221	0.4709	-3.0725	-3.2134	1.0221	0.4709	-3.0725	-3.2134	2	1	1	0
Q6P542	Abcf1	0.2296	0.5719	-3.0797	-2.1542	0.2296	0.5719	-3.0797	-2.1542	2	1	1	0
Q80UG5	Septin9	0.2154	-0.0838	-1.5943	-2.5845	0.2154	-0.0838	-1.5943	-2.5845	2	1	1	0
Q8BGR2	Lrrc8d	-2.5367	0.3122	-0.7446	-1.6868	-2.5367	0.3122	-0.7446	-1.6868	2	1	1	0
Q8BIK4	Dock9	-3.7853	0.775	-2.502	0.2608	-3.7853	0.775	-2.502	0.2608	2	1	1	0
Q8BJ64	Chdh	-0.1416	0.1269	-1.9536	-1.935	-0.1416	0.1269	-1.9536	-1.935	2	1	1	0
Q8BVE3	Atp6v1h	-1.9353	-0.7699	-1.7161	-0.1757	-1.9353	-0.7699	-1.7161	-0.1757	2	1	1	0
Q8BX10	Pgam5	-1.6389	-1.0547	-1.7994	-0.6618	-1.6389	-1.0547	-1.7994	-0.6618	2	1	1	0
Q8C166	Cpne1	-0.3811	-1.4746	-1.8358	-1.665	-0.3811	-1.4746	-1.8358	-1.665	2	1	1	0
Q8K183	Pdxk	0.8655	-0.1194	-1.747	-1.5728	0.8655	-0.1194	-1.747	-1.5728	2	1	1	0
Q8R2R1	Pomt1	0.2581	0.1136	-2.3001	-1.8762	0.2581	0.1136	-2.3001	-1.8762	2	1	1	0
Q8VCC1	Hpgd	0.6725	0.5522	-1.8996	-2.5616	0.6725	0.5522	-1.8996	-2.5616	2	1	1	0
Q8VCH0	Acaa1b	1.2242	0.7801	-2.1838	-2.2023	1.2242	0.7801	-2.1838	-2.2023	2	1	1	0
Q91VH6	Memo1	0.4805	0.142	-1.675	-2.2196	0.4805	0.142	-1.675	-2.2196	2	1	1	0
Q91WP0	Masp2	-1.5152	-0.2661	-2.6503	0.1484	-1.5152	-0.2661	-2.6503	0.1484	2	1	1	0
Q91WT9	Cbs	0.8216	0.2831	-2.0692	-3.9942	0.8216	0.2831	-2.0692	-3.9942	2	1	1	0
Q921H8	Acaa1a	1.0322	0.7118	-1.7015	-1.6654	1.0322	0.7118	-1.7015	-1.6654	2	1	1	0
Q924Y0	Bbox1	0.1413	0.6383	-1.5153	-1.7285	0.1413	0.6383	-1.5153	-1.7285	2	1	1	0
Q93092	Taldo1	-3.1962	-2.5715	-0.3613	-1.1359	-3.1962	-2.5715	-0.3613	-1.1359	2	1	1	0
Q99JW2	Acy1	1.0738	0.9948	-2.4106	-2.0321	1.0738	0.9948	-2.4106	-2.0321	2	1	1	0
Q99LX0	Park7	0.3194	0.1657	-1.9359	-2.3214	0.3194	0.1657	-1.9359	-2.3214	2	1	1	0
Q9CPU0	Glo1	1.2671	0.7205	-1.7715	-3.1698	1.2671	0.7205	-1.7715	-3.1698	2	1	1	0
Q9CQA3	Sdhb	0.6642	0.1387	-1.5735	-1.7642	0.6642	0.1387	-1.5735	-1.7642	2	1	1	0
Q9CQR2	Rps21	0.1651	-0.4945	-1.6852	-1.5542	0.1651	-0.4945	-1.6852	-1.5542	2	1	1	0
Q9CQS4	Slc25a46	0.1478	0.8943	-1.5412	-1.7179	0.1478	0.8943	-1.5412	-1.7179	2	1	1	0
Q9CRB9	Chchd3	-0.4271	0.213	-3.5995	-2.46	-0.4271	0.213	-3.5995	-2.46	2	1	1	0
Q9CWJ9	Atic	0.3975	0.498	-3.1268	-2.3519	0.3975	0.498	-3.1268	-2.3519	2	1	1	0
Q9CX00	Ist1	-1.2566	-1.2798	-1.7386	-2.4181	-1.2566	-1.2798	-1.7386	-2.4181	2	1	1	0
Q9CXN7	Pbld2	0.6597	-0.4572	-1.9097	-3.5414	0.6597	-0.4572	-1.9097	-3.5414	2	1	1	0
Q9D273	Mmab	0.4503	0.4557	-2.2989	-2.2049	0.4503	0.4557	-2.2989	-2.2049	2	1	1	0
Q9D5T0	Atad1	-1.0594	0.1301	-2.2571	-1.7267	-1.0594	0.1301	-2.2571	-1.7267	2	1	1	0
Q9D7S7	Rpl22l1	-0.3534	0.0825	-2.2482	-1.8369	-0.3534	0.0825	-2.2482	-1.8369	2	1	1	0
Q9D8B3	Chmp4b	-2.2147	-1.2054	-2.5889	-1.1657	-2.2147	-1.2054	-2.5889	-1.1657	2	1	1	0
Q9DBA8	Amdhd1	0.8144	0.7371	-2.7426	-2.5927	0.8144	0.7371	-2.7426	-2.5927	2	1	1	0
Q9DCG6	Pbld1	1.0507	-0.2251	-1.9469	-1.9713	1.0507	-0.2251	-1.9469	-1.9713	2	1	1	0
Q9DCT1	Akr1e2	0.1582	0.7315	-2.4523	-3.585	0.1582	0.7315	-2.4523	-3.585	2	1	1	0
Q9JHW2	Nit2	0.7747	0.1916	-1.6692	-1.7753	0.7747	0.1916	-1.6692	-1.7753	2	1	1	0
Q9JII5	Dazap1	0.399	0.248	-2.9441	-1.6539	0.399	0.248	-2.9441	-1.6539	2	1	1	0
Q9JII6	Akr1a1	0.4853	0.5839	-2.7396	-3.5885	0.4853	0.5839	-2.7396	-3.5885	2	1	1	0
Q9JIL4	Pdzk1	0.162	0.3888	-1.8774	-1.9326	0.162	0.3888	-1.8774	-1.9326	2	1	1	0
Q9JJN5	Cpn1	-0.5909	0.0202	-1.5753	-1.7022	-0.5909	0.0202	-1.5753	-1.7022	2	1	1	0
Q9QY30	Abcb11	-1.521	-1.3543	-1.2883	-2.2067	-1.521	-1.3543	-1.2883	-2.2067	2	1	1	0
Q9QYI5	Dnajb2	-0.0225	0.5847	-2.8295	-1.851	-0.0225	0.5847	-2.8295	-1.851	2	1	1	0
Q9QZX7	Srr	-0.2609	-1.0948	-2.1297	-2.584	-0.2609	-1.0948	-2.1297	-2.584	2	1	1	0
Q9R1P4	Psma1	1.3087	0.4407	-1.8789	-4.5156	1.3087	0.4407	-1.8789	-4.5156	2	1	1	0
Q9R257	Hebp1	0.5364	0.5894	-2.5513	-2.071	0.5364	0.5894	-2.5513	-2.071	2	1	1	0
Q9WV27	Atp1a4	-1.7989	-1.6223	-0.7495	-0.5719	-1.7989	-1.6223	-0.7495	-0.5719	2	1	1	0
Q9Z1G3	Atp6v1c1	-2.2169	-1.5463	-1.1717	0.157	-2.2169	-1.5463	-1.1717	0.157	2	1	1	0
Q9Z2U1	Psma5	-0.6884	-1.6465	-1.1764	-1.9239	-0.6884	-1.6465	-1.1764	-1.9239	2	1	1	0
Q9Z2W0	Dnpep	-0.1044	0.186	-2.6926	-1.7375	-0.1044	0.186	-2.6926	-1.7375	2	1	1	0
A2A8L5	Ptprf	-0.9627	0.3657	-0.6166	-1.7123	-0.9627	0.3657	-0.6166	-1.7123	2	1	1	0
A3KMP2	Ttc38	0.708	-0.2333	0.2407	-1.644	0.708	-0.2333	0.2407	-1.644	2	1	1	0
B2RXS4	Plxnb2	-1.208	-0.8016	-0.4726	-1.5013	-1.208	-0.8016	-0.4726	-1.5013	2	1	1	0
F8VPU2	Farp1	-1.9777	-0.366	-0.5741	-1.3651	-1.9777	-0.366	-0.5741	-1.3651	2	1	1	0
G3X982	Aox3	0.4956	-0.2591	0.3728	-1.9847	0.4956	-0.2591	0.3728	-1.9847	2	1	1	0
G5E897	Poglut3	0.4496	0.8828	-1.8916	-0.5251	0.4496	0.8828	-1.8916	-0.5251	2	1	1	0
G5E8K5	Ank3	-0.4035	0.3777	-1.9843	-0.3809	-0.4035	0.3777	-1.9843	-0.3809	2	1	1	0
O08553	Dpysl2	0.0601	-1.0781	1.3302	-2.3245	0.0601	-1.0781	1.3302	-2.3245	2	1	1	0
O08582	Gtpbp1	0.1292	-0.6615	-0.5301	-2.2339	0.1292	-0.6615	-0.5301	-2.2339	2	1	1	0
O08677	Kng1	1.3427	0.2751	-1.5337	-1.0242	1.3427	0.2751	-1.5337	-1.0242	2	1	1	0
O08691	Arg2	0.5574	-1.1873	-0.6399	-1.9566	0.5574	-1.1873	-0.6399	-1.9566	2	1	1	0
O08692	Ngp	-2.1851	0.0277	-1.4779	-0.8315	-2.1851	0.0277	-1.4779	-0.8315	2	1	1	0
O08705	Slc10a1	0.2932	0.2187	-0.4693	-1.7443	0.2932	0.2187	-0.4693	-1.7443	2	1	1	0
O08709	Prdx6	1.1833	0.2655	-1.3259	-2.7728	1.1833	0.2655	-1.3259	-2.7728	2	1	1	0
O09061	Psmb1	0.8982	0.1854	-1.2108	-3.6174	0.8982	0.1854	-1.2108	-3.6174	2	1	1	0
O09131	Gsto1	1.4964	0.7951	-2.1258	-1.3472	1.4964	0.7951	-2.1258	-1.3472	2	1	1	0
O35226	Psmd4	0.808	0.5655	-1.149	-1.9909	0.808	0.5655	-1.149	-1.9909	2	1	1	0
O35593	Psmd14	0.1999	-1.0049	-1.2866	-3.1668	0.1999	-1.0049	-1.2866	-3.1668	2	1	1	0
O35685	Nudc	-0.1594	-1.0943	-1.6421	-0.4824	-0.1594	-1.0943	-1.6421	-0.4824	2	1	1	0
O35969	Gamt	0.6746	0.1934	-0.6921	-3.7637	0.6746	0.1934	-0.6921	-3.7637	2	1	1	0
O70165	Fcn1	0.5988	-0.1655	-2.0504	-0.0419	0.5988	-0.1655	-2.0504	-0.0419	2	1	1	0
O70194	Eif3d	0.392	-1.495	-1.2461	-1.8036	0.392	-1.495	-1.2461	-1.8036	2	1	1	0
O70362	Gpld1	0.6778	0.2466	-1.7522	-1.1331	0.6778	0.2466	-1.7522	-1.1331	2	1	1	0
O70435	Psma3	0.0733	-0.2689	-0.8521	-2.205	0.0733	-0.2689	-0.8521	-2.205	2	1	1	0
O70475	Ugdh	-1.1333	-0.598	-0.6742	-1.6579	-1.1333	-0.598	-0.6742	-1.6579	2	1	1	0
O88343	Slc4a4	-0.9616	-0.1733	-1.5539	-1.1327	-0.9616	-0.1733	-1.5539	-1.1327	2	1	1	0
O88487	Dync1i2	0.2839	-0.2056	-1.2854	-1.6241	0.2839	-0.2056	-1.2854	-1.6241	2	1	1	0
O88623	Usp2	-1.0085	0.252	-0.5187	-1.9514	-1.0085	0.252	-0.5187	-1.9514	2	1	1	0
O88685	Psmc3	-0.0606	-0.6322	-1.1465	-7.17	-0.0606	-0.6322	-1.1465	-7.17	2	1	1	0
O88958	Gnpda1	-0.7107	-1.0031	0.095	-3.1005	-0.7107	-1.0031	0.095	-3.1005	2	1	1	0
P00329	Adh1	0.7955	0.1589	-0.7007	-2.5989	0.7955	0.1589	-0.7007	-2.5989	2	1	1	0
P01845	Iglc3	-0.4602	0.3026	-0.6644	-1.5745	-0.4602	0.3026	-0.6644	-1.5745	2	1	1	0
P04919	Slc4a1	-0.3092	0.2509	-2.1999	0.0549	-0.3092	0.2509	-2.1999	0.0549	2	1	1	0
P05064	Aldoa	0.0317	-0.6172	-1.1708	-1.5451	0.0317	-0.6172	-1.1708	-1.5451	2	1	1	0
P06745	Gpi	0.3858	0.714	0.3108	-1.8839	0.3858	0.714	0.3108	-1.8839	2	1	1	0
P06801	Me1	0.3085	0.4712	0.2585	-1.6349	0.3085	0.4712	0.2585	-1.6349	2	1	1	0
P08032	Spta1	-0.2125	0.2947	-2.6034	-0.9626	-0.2125	0.2947	-2.6034	-0.9626	2	1	1	0
P08071	Ltf	-2.1097	0.1721	-0.6352	-0.8072	-2.1097	0.1721	-0.6352	-0.8072	2	1	1	0
P08101	Fcgr2	-0.0839	-0.3889	-0.7978	-2.1343	-0.0839	-0.3889	-0.7978	-2.1343	2	1	1	0
P08249	Mdh2	0.4011	-0.0352	-1.5437	-1.3374	0.4011	-0.0352	-1.5437	-1.3374	2	1	1	0
P0C0A3	Chmp6	-1.5496	-0.3528	-1.4142	-1.1426	-1.5496	-0.3528	-1.4142	-1.1426	2	1	1	0
P10518	Alad	0.3931	-0.3076	-0.3871	-1.8796	0.3931	-0.3076	-0.3871	-1.8796	2	1	1	0
P10649	Gstm1	0.5083	-0.4952	0.1219	-1.5635	0.5083	-0.4952	0.1219	-1.5635	2	1	1	0
P12787	Cox5a	0.6886	-0.1359	-1.502	-1.206	0.6886	-0.1359	-1.502	-1.206	2	1	1	0
P14094	Atp1b1	-1.3663	-1.4011	-1.2978	-1.8544	-1.3663	-1.4011	-1.2978	-1.8544	2	1	1	0
P14131	Rps16	-0.1177	0.0988	-1.8887	-1.1199	-0.1177	0.0988	-1.8887	-1.1199	2	1	1	0
P14246	Slc2a2	-0.6733	-0.6814	-1.0497	-2.367	-0.6733	-0.6814	-1.0497	-2.367	2	1	1	0
P15508	Sptb	-0.227	0.306	-2.2293	-0.5603	-0.227	0.306	-2.2293	-0.5603	2	1	1	0
P15626	Gstm2	0.3306	0.2669	1.0908	-2.742	0.3306	0.2669	1.0908	-2.742	2	1	1	0
P16015	Ca3	-0.0682	0.6024	-1.3643	-1.9238	-0.0682	0.6024	-1.3643	-1.9238	2	1	1	0
P16045	Lgals1	-0.5931	-0.7982	-0.3097	-1.6565	-0.5931	-0.7982	-0.3097	-1.6565	2	1	1	0
P16331	Pah	0.8821	0.7957	0.1151	-3.3491	0.8821	0.7957	0.1151	-3.3491	2	1	1	0
P16546	Sptan1	-1.1031	-1.5302	-0.9091	-0.9114	-1.1031	-1.5302	-0.9091	-0.9114	2	1	1	0
P17426	Ap2a1	-0.4402	-0.3742	-1.9338	-0.0929	-0.4402	-0.3742	-1.9338	-0.0929	2	1	1	0
P17751	Tpi1	1.0832	0.7128	-0.9361	-2.002	1.0832	0.7128	-0.9361	-2.002	2	1	1	0
P19001	Krt19	-0.6842	-0.5059	-2.6784	-0.1056	-0.6842	-0.5059	-2.6784	-0.1056	2	1	1	0
P19096	Fasn	0.6895	0.2549	0.031	-1.7759	0.6895	0.2549	0.031	-1.7759	2	1	1	0
P19157	Gstp1	-0.2215	0.2423	0.3143	-2.7334	-0.2215	0.2423	0.3143	-2.7334	2	1	1	0
P21550	Eno3	0.6127	-0.8857	-0.5026	-2.6803	0.6127	-0.8857	-0.5026	-2.6803	2	1	1	0
P23591	Tsta3	0.3882	0.663	-0.6702	-3.107	0.3882	0.663	-0.6702	-3.107	2	1	1	0
P24472	Gsta4	0.9823	0.3274	0.2013	-2.453	0.9823	0.3274	0.2013	-2.453	2	1	1	0
P24549	Aldh1a1	-0.0288	0.248	-0.4794	-2.0065	-0.0288	0.248	-0.4794	-2.0065	2	1	1	0
P26443	Glud1	0.7927	0.4952	-1.03	-1.5608	0.7927	0.4952	-1.03	-1.5608	2	1	1	0
P26638	Sars	-0.1741	0.0093	0.6467	-4.3676	-0.1741	0.0093	0.6467	-4.3676	2	1	1	0
P28230	Gjb1	0.4998	0.5085	0.1226	-1.8045	0.4998	0.5085	0.1226	-1.8045	2	1	1	0
P28271	Aco1	0.5861	0.4248	-0.6398	-1.8441	0.5861	0.4248	-0.6398	-1.8441	2	1	1	0
P28474	Adh5	0.702	0.1734	-1.2827	-2.7394	0.702	0.1734	-1.2827	-2.7394	2	1	1	0
P30275	Ckmt1	-0.6672	0.5214	-1.5312	-0.6331	-0.6672	0.5214	-1.5312	-0.6331	2	1	1	0
P32883	Kras	-0.9401	0.0981	-1.0084	-2.0412	-0.9401	0.0981	-1.0084	-2.0412	2	1	1	0
P35278	Rab5c	-0.6826	0.2155	-1.8762	-0.8891	-0.6826	0.2155	-1.8762	-0.8891	2	1	1	0
P35282	Rab21	-0.0744	-0.1094	-1.7353	-0.8261	-0.0744	-0.1094	-1.7353	-0.8261	2	1	1	0
P35492	Hal	0.8206	0.384	-0.8892	-1.8834	0.8206	0.384	-0.8892	-1.8834	2	1	1	0
P40630	Tfam	-0.3057	-0.4978	-2.4315	-1.0911	-0.3057	-0.4978	-2.4315	-1.0911	2	1	1	0
P40936	Inmt	0.7513	0.3472	0.0513	-1.5302	0.7513	0.3472	0.0513	-1.5302	2	1	1	0
P41245	Mmp9	-1.3374	-0.433	-2.0072	0.3294	-1.3374	-0.433	-2.0072	0.3294	2	1	1	0
P43274	Hist1h1e	-1.3629	-0.4141	-0.8947	-1.7772	-1.3629	-0.4141	-0.8947	-1.7772	2	1	1	0
P45376	Akr1b1	-0.327	-0.3526	-0.7945	-1.5723	-0.327	-0.3526	-0.7945	-1.5723	2	1	1	0
P46471	Psmc2	0.8051	0.108	-0.8749	-2.0959	0.8051	0.108	-0.8749	-2.0959	2	1	1	0
P47877	Igfbp2	0.8393	-0.3165	-0.3423	-1.5765	0.8393	-0.3165	-0.3423	-1.5765	2	1	1	0
P48193	Epb41	-1.0333	-0.2181	-2.2965	-1.06	-1.0333	-0.2181	-2.2965	-1.06	2	1	1	0
P49222	Epb42	-0.126	-0.1164	-1.9048	0.111	-0.126	-0.1164	-1.9048	0.111	2	1	1	0
P49429	Hpd	1.3771	0.1673	-1.2687	-1.9202	1.3771	0.1673	-1.2687	-1.9202	2	1	1	0
P49443	Ppm1a	1.4116	0.5221	-1.9082	-1.2917	1.4116	0.5221	-1.9082	-1.2917	2	1	1	0
P50247	Ahcy	0.5522	0.2622	-0.3294	-2.0091	0.5522	0.2622	-0.3294	-2.0091	2	1	1	0
P50431	Shmt1	0.8951	0.5526	-1.4159	-3.1792	0.8951	0.5526	-1.4159	-3.1792	2	1	1	0
P50518	Atp6v1e1	-1.1906	-1.3279	-2.6173	-1.3577	-1.1906	-1.3279	-2.6173	-1.3577	2	1	1	0
P50580	Pa2g4	0.1174	-0.0106	-2.244	-0.5979	0.1174	-0.0106	-2.244	-0.5979	2	1	1	0
P52840	Sult1a1	1.256	0.9399	0.408	-2.6574	1.256	0.9399	0.408	-2.6574	2	1	1	0
P53564	Cux1	0.2344	0.3384	-0.206	-1.8915	0.2344	0.3384	-0.206	-1.8915	2	1	1	0
P53657	Pklr	0.6799	0.5722	-1.0906	-2.3909	0.6799	0.5722	-1.0906	-2.3909	2	1	1	0
P54071	Idh2	0.0524	-0.1442	-0.6775	-1.7781	0.0524	-0.1442	-0.6775	-1.7781	2	1	1	0
P54099	Polg	-3.3898	-0.3635	-1.0304	-1.3376	-3.3898	-0.3635	-1.0304	-1.3376	2	1	1	0
P54775	Psmc4	0.8415	-0.0951	-1.1275	-4.5635	0.8415	-0.0951	-1.1275	-4.5635	2	1	1	0
P55014	Slc12a1	0.3193	-0.6072	-0.5516	-2.9019	0.3193	-0.6072	-0.5516	-2.9019	2	1	1	0
P55264	Adk	0.6009	0.4725	-1.2304	-3.8268	0.6009	0.4725	-1.2304	-3.8268	2	1	1	0
P55937	Golga3	-2.9211	-0.5162	-1.0974	-0.0807	-2.9211	-0.5162	-1.0974	-0.0807	2	1	1	0
P56655	Cyp2c38	0.4775	-0.8996	-0.3577	-1.6633	0.4775	-0.8996	-0.3577	-1.6633	2	1	1	0
P57746	Atp6v1d	1.2231	-0.4789	-1.5456	-0.7338	1.2231	-0.4789	-1.5456	-0.7338	2	1	1	0
P58137	Acot8	-0.3557	0.4061	-2.5719	0.313	-0.3557	0.4061	-2.5719	0.313	2	1	1	0
P58735	Slc26a1	-0.4734	-0.6794	-0.0538	-2.8166	-0.4734	-0.6794	-0.0538	-2.8166	2	1	1	0
P60670	Nploc4	0.8541	0.3888	0.2265	-1.9774	0.8541	0.3888	0.2265	-1.9774	2	1	1	0
P61458	Pcbd1	1.2516	0.5347	0.1302	-2.6339	1.2516	0.5347	0.1302	-2.6339	2	1	1	0
P61750	Arf4	-2.5507	-0.5807	-0.3031	-0.6859	-2.5507	-0.5807	-0.3031	-0.6859	2	1	1	0
P62192	Psmc1	0.4856	-0.4004	-0.0294	-3.2369	0.4856	-0.4004	-0.0294	-3.2369	2	1	1	0
P62264	Rps14	-0.1768	-0.2869	-1.8152	-0.3948	-0.1768	-0.2869	-1.8152	-0.3948	2	1	1	0
P62627	Dynlrb1	-0.1465	-0.1594	-1.6316	-1.0881	-0.1465	-0.1594	-1.6316	-1.0881	2	1	1	0
P62754	Rps6	0.4459	0.1899	-2.4473	-1.1295	0.4459	0.1899	-2.4473	-1.1295	2	1	1	0
P62855	Rps26	-0.1832	0.5432	-2.7857	-1.4266	-0.1832	0.5432	-2.7857	-1.4266	2	1	1	0
P62960	Ybx1	0.0404	0.221	-2.7848	-1.249	0.0404	0.221	-2.7848	-1.249	2	1	1	0
P63017	Hspa8	0.9259	0.4983	-0.9432	-1.5543	0.9259	0.4983	-0.9432	-1.5543	2	1	1	0
P63028	Tpt1	-0.3946	-1.2756	0.5206	-2.5442	-0.3946	-1.2756	0.5206	-2.5442	2	1	1	0
P63073	Eif4e	-0.0387	-0.0777	-0.9118	-1.6255	-0.0387	-0.0777	-0.9118	-1.6255	2	1	1	0
P68368	Tuba4a	-0.3363	-1.2859	-0.0578	-1.6327	-0.3363	-1.2859	-0.0578	-1.6327	2	1	1	0
P68372	Tubb4b	-0.0475	-0.1092	-1.0402	-1.8941	-0.0475	-0.1092	-1.0402	-1.8941	2	1	1	0
P70441	Slc9a3r1	0.5722	0.2798	-1.4643	-2.0734	0.5722	0.2798	-1.4643	-2.0734	2	1	1	0
P84096	Rhog	-1.4982	-0.8402	-0.7677	-1.6404	-1.4982	-0.8402	-0.7677	-1.6404	2	1	1	0
P97494	Gclc	0.3406	0.7587	-0.0027	-2.1192	0.3406	0.7587	-0.0027	-2.1192	2	1	1	0
P97765	Wbp2	-0.2308	0.9333	-2.8451	-0.2641	-0.2308	0.9333	-2.8451	-0.2641	2	1	1	0
P99026	Psmb4	-0.2921	-0.5294	0.1704	-2.1873	-0.2921	-0.5294	0.1704	-2.1873	2	1	1	0
Q02053	Uba1	0.0357	-0.1473	0.4532	-2.1626	0.0357	-0.1473	0.4532	-2.1626	2	1	1	0
Q02248	Ctnnb1	-1.1267	-1.1236	-0.5573	-1.8742	-1.1267	-1.1236	-0.5573	-1.8742	2	1	1	0
Q02257	Jup	-1.124	-0.5655	-0.5362	-1.9325	-1.124	-0.5655	-0.5362	-1.9325	2	1	1	0
Q02357	Ank1	0.0918	0.7869	-2.2195	-0.7905	0.0918	0.7869	-2.2195	-0.7905	2	1	1	0
Q03963	Eif2ak2	-0.6972	-1.0211	-2.1226	-0.2133	-0.6972	-1.0211	-2.1226	-0.2133	2	1	1	0
Q05D44	Eif5b	-2.0904	-0.1632	-0.5857	0.1728	-2.0904	-0.1632	-0.5857	0.1728	2	1	1	0
Q2TPA8	Hsdl2	1.2706	0.6057	-1.4679	-1.6332	1.2706	0.6057	-1.4679	-1.6332	2	1	1	0
Q3THS6	Mat2a	0.6731	-0.0799	-0.5715	-2.7905	0.6731	-0.0799	-0.5715	-2.7905	2	1	1	0
Q3TXS7	Psmd1	0.0336	-0.8458	0.2227	-1.8433	0.0336	-0.8458	0.2227	-1.8433	2	1	1	0
Q3U1V6	Uevld	-0.3747	-0.426	-1.8473	-1.2686	-0.3747	-0.426	-1.8473	-1.2686	2	1	1	0
Q3U9G9	Lbr	0.4613	0.9463	-0.9494	-1.9675	0.4613	0.9463	-0.9494	-1.9675	2	1	1	0
Q3UGR5	Hdhd2	0.9921	0.6208	-1.6544	-1.4827	0.9921	0.6208	-1.6544	-1.4827	2	1	1	0
Q3UIR3	Dtx3l	-0.4597	-1.3646	-1.8348	0.5371	-0.4597	-1.3646	-1.8348	0.5371	2	1	1	0
Q3UZZ6	Sult1d1	1.0506	0.7619	-1.1976	-1.5633	1.0506	0.7619	-1.1976	-1.5633	2	1	1	0
Q3V1T4	P3h1	-2.7857	-0.731	-0.4997	0.2195	-2.7857	-0.731	-0.4997	0.2195	2	1	1	0
Q5FW57	Gm4952	0.4758	-0.0073	-1.8808	-0.8671	0.4758	-0.0073	-1.8808	-0.8671	2	1	1	0
Q5HZI1	Mtus1	-2.1331	0.1266	-1.298	-0.0078	-2.1331	0.1266	-1.298	-0.0078	2	1	1	0
Q5U462	Cdcp1	-0.4581	-1.2602	0.2327	-2.1495	-0.4581	-1.2602	0.2327	-2.1495	2	1	1	0
Q5U5V2	Hykk	-0.4229	0.0589	-0.3465	-2.0142	-0.4229	0.0589	-0.3465	-2.0142	2	1	1	0
Q60668	Hnrnpd	0.1167	0.1813	-0.6518	-2.5828	0.1167	0.1813	-0.6518	-2.5828	2	1	1	0
Q60692	Psmb6	0.782	0.4101	-1.3208	-3.1195	0.782	0.4101	-1.3208	-3.1195	2	1	1	0
Q60902	Eps15l1	-1.5133	-0.4541	-1.2822	-0.72	-1.5133	-0.4541	-1.2822	-0.72	2	1	1	0
Q61133	Gstt2	0.2897	-0.4427	-0.5312	-1.6011	0.2897	-0.4427	-0.5312	-1.6011	2	1	1	0
Q61316	Hspa4	-0.5469	-0.4311	0.0116	-1.7205	-0.5469	-0.4311	0.0116	-1.7205	2	1	1	0
Q61699	Hsph1	0.1774	0.6418	0.1322	-2.0175	0.1774	0.6418	0.1322	-2.0175	2	1	1	0
Q62393	Tpd52	-0.3516	-0.2044	-1.3392	-2.0375	-0.3516	-0.2044	-1.3392	-2.0375	2	1	1	0
Q62465	Vat1	0.027	0.4316	0.0786	-1.8168	0.027	0.4316	0.0786	-1.8168	2	1	1	0
Q64514	Tpp2	0.0378	0.219	-0.5834	-1.5636	0.0378	0.219	-0.5834	-1.5636	2	1	1	0
Q68FL6	Mars	-0.641	-0.4477	-0.5757	-1.5744	-0.641	-0.4477	-0.5757	-1.5744	2	1	1	0
Q6A0A9	FAM120A	0.4739	0.374	0.2382	-1.9188	0.4739	0.374	0.2382	-1.9188	2	1	1	0
Q6P8X1	Snx6	0.3269	-0.7962	-1.4162	-2.1254	0.3269	-0.7962	-1.4162	-2.1254	2	1	1	0
Q6PB44	Ptpn23	0.5201	-1.2499	-1.424	-3.3191	0.5201	-1.2499	-1.424	-3.3191	2	1	1	0
Q6PD03	Ppp2r5a	-2.1313	0.8744	-0.2907	-0.7176	-2.1313	0.8744	-0.2907	-0.7176	2	1	1	0
Q6PE84	Stoml3	-0.7473	-0.0032	-1.731	-0.52	-0.7473	-0.0032	-1.731	-0.52	2	1	1	0
Q6PGC1	Dhx29	-1.8508	0.0521	-1.0726	-0.2635	-1.8508	0.0521	-1.0726	-0.2635	2	1	1	0
Q6Q899	Ddx58	-0.2328	0.6061	-1.7708	0.02	-0.2328	0.6061	-1.7708	0.02	2	1	1	0
Q6ZQM8	Ugt1a7c	-2.2084	-1.4471	-0.7452	0.35	-2.2084	-1.4471	-0.7452	0.35	2	1	1	0
Q78JT3	Haao	1.0285	-0.083	-1.3129	-1.8069	1.0285	-0.083	-1.3129	-1.8069	2	1	1	0
Q7TMM9	Tubb2a	0.0856	0.4008	-1.1693	-1.5699	0.0856	0.4008	-1.1693	-1.5699	2	1	1	0
Q7TMS5	Abcg2	-0.343	-0.0236	-1.4823	-3.383	-0.343	-0.0236	-1.4823	-3.383	2	1	1	0
Q80TY5	Vps13b	-1.7156	-0.202	-0.3421	-0.1932	-1.7156	-0.202	-0.3421	-0.1932	2	1	1	0
Q80W21	Gstm7	1.2523	0.0458	0.2942	-2.5143	1.2523	0.0458	0.2942	-2.5143	2	1	1	0
Q80W22	Thnsl2	0.2742	0.3767	-1.9553	-1.2809	0.2742	0.3767	-1.9553	-1.2809	2	1	1	0
Q80X50	Ubap2l	1.1918	0.7698	-0.3844	-3.6121	1.1918	0.7698	-0.3844	-3.6121	2	1	1	0
Q80XL7	Mppe1	0.365	0.4557	-1.1039	-1.8086	0.365	0.4557	-1.1039	-1.8086	2	1	1	0
Q8BFR5	Tufm	0.245	-0.0255	-1.5703	-0.9978	0.245	-0.0255	-1.5703	-0.9978	2	1	1	0
Q8BGQ7	Aars	0.1851	0.8343	0.7085	-2.3113	0.1851	0.8343	0.7085	-2.3113	2	1	1	0
Q8BH00	Aldh8a1	1.1562	-0.232	-0.6747	-2.0748	1.1562	-0.232	-0.6747	-2.0748	2	1	1	0
Q8BHG3	Tmem30b	-1.0873	-0.0176	-4.0502	-0.3539	-1.0873	-0.0176	-4.0502	-0.3539	2	1	1	0
Q8BJT9	Edem2	1.3489	-0.3392	0.7419	-1.525	1.3489	-0.3392	0.7419	-1.525	2	1	1	0
Q8BJW6	Eif2a	-0.2943	-1.0694	-0.4553	-1.6745	-0.2943	-1.0694	-0.4553	-1.6745	2	1	1	0
Q8BJY1	Psmd5	0.8343	-1.3747	0.0035	-1.9392	0.8343	-1.3747	0.0035	-1.9392	2	1	1	0
Q8BMJ2	Lars	-0.4906	-0.251	-1.4734	-1.7484	-0.4906	-0.251	-1.4734	-1.7484	2	1	1	0
Q8BML9	Qars	-0.846	-1.045	-0.2387	-2.3836	-0.846	-1.045	-0.2387	-2.3836	2	1	1	0
Q8BMS4	Coq3	-0.1543	-1.0121	-0.3627	-1.6364	-0.1543	-1.0121	-0.3627	-1.6364	2	1	1	0
Q8BTZ7	Gmppb	0.001	-1.3941	0.8912	-2.0949	0.001	-1.3941	0.8912	-2.0949	2	1	1	0
Q8BY87	Usp47	0.0469	-0.0388	-0.8118	-1.579	0.0469	-0.0388	-0.8118	-1.579	2	1	1	0
Q8C0Z1	Fam234a	-0.7421	-0.3056	-0.8436	-1.9329	-0.7421	-0.3056	-0.8436	-1.9329	2	1	1	0
Q8C729	Fam126b	-0.8545	-0.4166	-0.1757	-1.8504	-0.8545	-0.4166	-0.1757	-1.8504	2	1	1	0
Q8CC86	Naprt	0.0482	0.2185	-0.4268	-1.8681	0.0482	0.2185	-0.4268	-1.8681	2	1	1	0
Q8CDN6	Txnl1	0.197	0.1702	-0.6765	-1.8223	0.197	0.1702	-0.6765	-1.8223	2	1	1	0
Q8CG76	Akr7a2	0.6021	0.4104	-2.6484	-1.4334	0.6021	0.4104	-2.6484	-1.4334	2	1	1	0
Q8CGC7	Eprs	-0.4668	-0.775	-0.2678	-3.2456	-0.4668	-0.775	-0.2678	-3.2456	2	1	1	0
Q8CI59	Steap3	-0.1045	0.6186	0.2585	-2.361	-0.1045	0.6186	0.2585	-2.361	2	1	1	0
Q8CJH3	Plxnb1	-1.1831	-1.9351	-0.9721	-1.4993	-1.1831	-1.9351	-0.9721	-1.4993	2	1	1	0
Q8JZN7	Rhot2	-0.652	0.0742	-2.0967	-0.8929	-0.652	0.0742	-2.0967	-0.8929	2	1	1	0
Q8K0H1	Slc47a1	-1.9864	-1.4521	-1.1171	-0.2668	-1.9864	-1.4521	-1.1171	-0.2668	2	1	1	0
Q8K157	Galm	0.4171	-0.0879	-0.1305	-1.9564	0.4171	-0.0879	-0.1305	-1.9564	2	1	1	0
Q8K440	Abca8b	-1.0636	-0.3446	-0.4678	-1.5381	-1.0636	-0.3446	-0.4678	-1.5381	2	1	1	0
Q8QZR5	Gpt	1.4956	-0.0393	-0.1657	-1.8836	1.4956	-0.0393	-0.1657	-1.8836	2	1	1	0
Q8R0Y6	Aldh1l1	0.1535	-0.2252	-0.6783	-2.106	0.1535	-0.2252	-0.6783	-2.106	2	1	1	0
Q8R127	Sccpdh	-2.6848	0.6825	-1.3213	-0.7204	-2.6848	0.6825	-1.3213	-0.7204	2	1	1	0
Q8R146	Apeh	0.846	0.1333	-1.0189	-1.7924	0.846	0.1333	-1.0189	-1.7924	2	1	1	0
Q8R164	Bphl	0.6539	0.2143	-1.7345	-1.1819	0.6539	0.2143	-1.7345	-1.1819	2	1	1	0
Q8R3F5	Mcat	0.322	0.1683	-1.5424	-1.2607	0.322	0.1683	-1.5424	-1.2607	2	1	1	0
Q8R5K2	Usp33	0.3602	0.7487	-2.4195	-1.4378	0.3602	0.7487	-2.4195	-1.4378	2	1	1	0
Q8VBT2	Sds	1.0697	0.8877	-0.7407	-1.5944	1.0697	0.8877	-0.7407	-1.5944	2	1	1	0
Q8VBV7	Cops8	-0.5254	0.6056	-2.4562	0.825	-0.5254	0.6056	-2.4562	0.825	2	1	1	0
Q8VBX6	Mpdz	0.394	-0.4378	-2.3642	-0.665	0.394	-0.4378	-2.3642	-0.665	2	1	1	0
Q8VCN5	Cth	0.6928	-0.1224	-0.1408	-2.2749	0.6928	-0.1224	-0.1408	-2.2749	2	1	1	0
Q8VD75	Hip1	-1.1813	0.3574	-1.5752	-0.7725	-1.1813	0.3574	-1.5752	-0.7725	2	1	1	0
Q8VDN2	Atp1a1	-1.7679	-1.0405	-1.2723	-1.435	-1.7679	-1.0405	-1.2723	-1.435	2	1	1	0
Q8VE38	Oxnad1	-0.1148	-0.0175	-1.0281	-2.102	-0.1148	-0.0175	-1.0281	-2.102	2	1	1	0
Q8VEK3	Hnrnpu	-0.0547	0.3127	0.1119	-2.6585	-0.0547	0.3127	0.1119	-2.6585	2	1	1	0
Q8VI47	Abcc2	-0.2941	-0.2555	-0.7685	-1.6532	-0.2941	-0.2555	-0.7685	-1.6532	2	1	1	0
Q91V76	NoGeneName	1.0439	0.0868	-1.4841	-3.3206	1.0439	0.0868	-1.4841	-3.3206	2	1	1	0
Q91VC9	Ghitm	-2.4117	-0.1232	-0.8849	0.0405	-2.4117	-0.1232	-0.8849	0.0405	2	1	1	0
Q91VN0	Lrp5	0.8897	0.1424	-1.4735	-2.6745	0.8897	0.1424	-1.4735	-2.6745	2	1	1	0
Q91VU6	Dcaf11	-0.1036	0.0704	-0.2246	-2.054	-0.1036	0.0704	-0.2246	-2.054	2	1	1	0
Q91W50	Csde1	1.0039	-0.2503	-2.5189	-0.0798	1.0039	-0.2503	-2.5189	-0.0798	2	1	1	0
Q91W89	Man2c1	0.5333	0.5891	0.5744	-1.7203	0.5333	0.5891	0.5744	-1.7203	2	1	1	0
Q91WC3	Acsl6	-0.3443	0.2494	-1.6448	-1.1192	-0.3443	0.2494	-1.6448	-1.1192	2	1	1	0
Q91WG8	Gne	-0.0787	0.7154	-0.2802	-1.5747	-0.0787	0.7154	-0.2802	-1.5747	2	1	1	0
Q91WK1	Spryd4	0.6728	0.1707	-3.496	-0.9102	0.6728	0.1707	-3.496	-0.9102	2	1	1	0
Q91WS4	Bhmt2	0.0559	-0.7444	-1.562	-0.7687	0.0559	-0.7444	-1.562	-0.7687	2	1	1	0
Q91WT8	Rbm47	-0.8919	-0.5122	-1.9028	0.1655	-0.8919	-0.5122	-1.9028	0.1655	2	1	1	0
Q91WU5	As3mt	0.5709	0.8073	-0.3165	-2.2958	0.5709	0.8073	-0.3165	-2.2958	2	1	1	0
Q91X44	Gckr	-0.4024	-0.0516	0.4892	-2.5153	-0.4024	-0.0516	0.4892	-2.5153	2	1	1	0
Q91X83	Mat1a	0.4028	-0.1081	-0.834	-3.0231	0.4028	-0.1081	-0.834	-3.0231	2	1	1	0
Q91X91	Qprt	1.1989	-0.0481	-1.1121	-3.3622	1.1989	-0.0481	-1.1121	-3.3622	2	1	1	0
Q91XD4	Ftcd	0.2527	-0.734	-0.1457	-2.1109	0.2527	-0.734	-0.1457	-2.1109	2	1	1	0
Q91XE4	Acy3	0.5923	-0.3988	-0.9108	-2.2164	0.5923	-0.3988	-0.9108	-2.2164	2	1	1	0
Q91Y97	Aldob	0.9738	0.575	-2.8936	-1.2664	0.9738	0.575	-2.8936	-1.2664	2	1	1	0
Q91YI0	Asl	0.8776	-0.1917	-0.5895	-1.5129	0.8776	-0.1917	-0.5895	-1.5129	2	1	1	0
Q91YP3	Dera	0.3966	-1.0312	-1.1843	-1.6748	0.3966	-1.0312	-1.1843	-1.6748	2	1	1	0
Q91Z53	Grhpr	1.2908	-0.2917	-1.2844	-2.2458	1.2908	-0.2917	-1.2844	-2.2458	2	1	1	0
Q91ZJ5	Ugp2	0.8098	-0.2999	-0.4369	-1.8481	0.8098	-0.2999	-0.4369	-1.8481	2	1	1	0
Q920A7	Afg3l1	0.1482	0.4492	-1.5808	-1.0024	0.1482	0.4492	-1.5808	-1.0024	2	1	1	0
Q920R0	Als2	-0.2581	-0.6204	-3.1639	-1.4302	-0.2581	-0.6204	-3.1639	-1.4302	2	1	1	0
Q922B2	Dars	0.7553	0.4932	-1.3325	-2.1374	0.7553	0.4932	-1.3325	-2.1374	2	1	1	0
Q922E4	Pcyt2	0.9227	0.7997	-1.2915	-2.389	0.9227	0.7997	-1.2915	-2.389	2	1	1	0
Q922Z0	Ddo	0.4717	-0.1949	-1.0697	-1.5083	0.4717	-0.1949	-1.0697	-1.5083	2	1	1	0
Q923I7	Slc5a2	-1.5298	-0.6699	-0.9367	-0.1392	-1.5298	-0.6699	-0.9367	-0.1392	2	1	1	0
Q924L1	Letmd1	0.435	0.4527	0.8795	-1.6535	0.435	0.4527	0.8795	-1.6535	2	1	1	0
Q924T2	Mrps2	-1.8122	-0.7968	-1.1891	-0.6214	-1.8122	-0.7968	-1.1891	-0.6214	2	1	1	0
Q99020	Hnrnpab	-1.6384	0.0438	-0.3817	-0.3337	-1.6384	0.0438	-0.3817	-0.3337	2	1	1	0
Q99K30	Eps8l2	0.237	-0.0854	-0.9452	-1.5203	0.237	-0.0854	-0.9452	-1.5203	2	1	1	0
Q99KB8	Hagh	1.0431	0.0102	-1.9396	-0.9652	1.0431	0.0102	-1.9396	-0.9652	2	1	1	0
Q99KJ8	Dctn2	-0.6504	-0.149	-0.3866	-2.4522	-0.6504	-0.149	-0.3866	-2.4522	2	1	1	0
Q99KQ4	Nampt	-0.7158	0.1671	-0.0218	-1.6073	-0.7158	0.1671	-0.0218	-1.6073	2	1	1	0
Q99KR3	Lactb2	0.038	0.8341	-0.6581	-1.7788	0.038	0.8341	-0.6581	-1.7788	2	1	1	0
Q99L20	Gstt3	0.8498	0.4026	0.0765	-1.5127	0.8498	0.4026	0.0765	-1.5127	2	1	1	0
Q99L88	Sntb1	0.5937	-0.3896	-0.4786	-2.288	0.5937	-0.3896	-0.4786	-2.288	2	1	1	0
Q99N96	Mrpl1	-0.5541	-0.5666	-1.6005	-0.5223	-0.5541	-0.5666	-1.6005	-0.5223	2	1	1	0
Q99PT1	Arhgdia	0.8247	0.7717	-1.199	-3.2604	0.8247	0.7717	-1.199	-3.2604	2	1	1	0
Q9CPR4	Rpl17	0.5907	0.9271	-1.5159	-0.7802	0.5907	0.9271	-1.5159	-0.7802	2	1	1	0
Q9CPY7	Lap3	0.7276	0.2715	-1.1079	-1.7879	0.7276	0.2715	-1.1079	-1.7879	2	1	1	0
Q9CQC9	Sar1b	0.1652	0.3044	-0.1449	-1.6707	0.1652	0.3044	-0.1449	-1.6707	2	1	1	0
Q9CQE8	RTRAF	0.2898	0.4835	0.1003	-1.7485	0.2898	0.4835	0.1003	-1.7485	2	1	1	0
Q9CQV7	Dnajc19	-0.013	0.1449	-0.7166	-1.8172	-0.013	0.1449	-0.7166	-1.8172	2	1	1	0
Q9CR51	Atp6v1g1	1.1324	-0.8739	-2.3424	-0.6606	1.1324	-0.8739	-2.3424	-0.6606	2	1	1	0
Q9CR86	Carhsp1	0.75	0.2847	-0.7354	-2.3338	0.75	0.2847	-0.7354	-2.3338	2	1	1	0
Q9CR98	Fam136a	0.4116	0.4561	-0.6217	-2.0086	0.4116	0.4561	-0.6217	-2.0086	2	1	1	0
Q9CWS0	Ddah1	1.1962	0.3894	-1.2704	-2.2969	1.1962	0.3894	-1.2704	-2.2969	2	1	1	0
Q9CX56	Psmd8	0.3291	0.5076	-0.2061	-2.8977	0.3291	0.5076	-0.2061	-2.8977	2	1	1	0
Q9CXF0	Kynu	1.101	-0.0454	0.7329	-2.5404	1.101	-0.0454	0.7329	-2.5404	2	1	1	0
Q9CXW3	Cacybp	1.19	0.885	-0.7051	-1.6684	1.19	0.885	-0.7051	-1.6684	2	1	1	0
Q9CY18	Snx7	-2.6409	-0.8639	-0.9863	-0.5336	-2.6409	-0.8639	-0.9863	-0.5336	2	1	1	0
Q9CYZ2	Tpd52l2	1.0426	0.394	-0.9203	-3.0166	1.0426	0.394	-0.9203	-3.0166	2	1	1	0
Q9CZ30	Ola1	-0.5218	0.6923	-2.4287	-0.5404	-0.5218	0.6923	-2.4287	-0.5404	2	1	1	0
Q9CZW5	Tomm70	-0.4489	0.7163	-0.9901	-1.904	-0.4489	0.7163	-0.9901	-1.904	2	1	1	0
Q9CZX8	Rps19	0.3785	-0.7469	-0.591	-1.5615	0.3785	-0.7469	-0.591	-1.5615	2	1	1	0
Q9D0F9	Pgm1	-0.2484	-0.7042	0.0489	-1.9128	-0.2484	-0.7042	0.0489	-1.9128	2	1	1	0
Q9D0K2	Oxct1	-1.7905	-1.293	-0.8441	-0.5911	-1.7905	-1.293	-0.8441	-0.5911	2	1	1	0
Q9D0S9	Hint2	0.2915	0.1094	-2.4995	-1.0746	0.2915	0.1094	-2.4995	-1.0746	2	1	1	0
Q9D1I2	Card19	1.0087	0.9631	-0.1573	-2.1617	1.0087	0.9631	-0.1573	-2.1617	2	1	1	0
Q9D358	Acp1	0.1486	-0.166	0.2769	-1.522	0.1486	-0.166	0.2769	-1.522	2	1	1	0
Q9D5V6	Syap1	-0.1222	-0.1107	-2.0655	-0.3494	-0.1222	-0.1107	-2.0655	-0.3494	2	1	1	0
Q9D6J6	Ndufv2	0.7991	0.094	-1.5165	-1.0387	0.7991	0.094	-1.5165	-1.0387	2	1	1	0
Q9D6S7	Mrrf	0.4457	-0.0503	-1.7532	-1.1031	0.4457	-0.0503	-1.7532	-1.1031	2	1	1	0
Q9D6Y9	Gbe1	-0.1086	0.3661	-1.0295	-3.2467	-0.1086	0.3661	-1.0295	-3.2467	2	1	1	0
Q9D819	Ppa1	0.831	0.0134	0.2404	-2.3161	0.831	0.0134	0.2404	-2.3161	2	1	1	0
Q9D8N0	Eef1g	-0.2547	-1.5088	-0.8954	-1.1603	-0.2547	-1.5088	-0.8954	-1.1603	2	1	1	0
Q9DB15	Mrpl12	0.6001	0.1488	-0.8385	-1.6311	0.6001	0.1488	-0.8385	-1.6311	2	1	1	0
Q9DB29	Iah1	0.6205	-0.4863	-0.2898	-1.795	0.6205	-0.4863	-0.2898	-1.795	2	1	1	0
Q9DBB8	Dhdh	-0.4163	0.1081	-0.5218	-1.8787	-0.4163	0.1081	-0.5218	-1.8787	2	1	1	0
Q9DCC4	Pycr3	1.3797	0.2501	0.0155	-1.9158	1.3797	0.2501	0.0155	-1.9158	2	1	1	0
Q9DCH4	Eif3f	-0.4457	-0.6586	0.2407	-1.5433	-0.4457	-0.6586	0.2407	-1.5433	2	1	1	0
Q9EPB5	Serhl	0.1552	0.5782	-1.7168	-1.2282	0.1552	0.5782	-1.7168	-1.2282	2	1	1	0
Q9ET01	Pygl	-0.1571	-0.061	-1.1075	-2.6575	-0.1571	-0.061	-1.1075	-2.6575	2	1	1	0
Q9JHS4	Clpx	0.3689	0.289	-1.6736	-1.1206	0.3689	0.289	-1.6736	-1.1206	2	1	1	0
Q9JHW4	Eefsec	0.9062	-0.562	-2.0187	-0.7827	0.9062	-0.562	-2.0187	-0.7827	2	1	1	0
Q9JJK2	Lancl2	0.9024	0.1933	-2.5697	-0.5274	0.9024	0.1933	-2.5697	-0.5274	2	1	1	0
Q9JMA1	Usp14	0.318	0.5305	-0.023	-2.7434	0.318	0.5305	-0.023	-2.7434	2	1	1	0
Q9JMK2	Csnk1e	-2.4089	-1.3451	-0.9605	-0.3151	-2.4089	-1.3451	-0.9605	-0.3151	2	1	1	0
Q9QUM9	Psma6	-0.0322	-0.6435	-0.3034	-2.4027	-0.0322	-0.6435	-0.3034	-2.4027	2	1	1	0
Q9QXD6	Fbp1	1.3083	0.2201	-0.2018	-1.5517	1.3083	0.2201	-0.2018	-1.5517	2	1	1	0
Q9QXL2	Kif21a	0.0955	0.0216	-0.4713	-1.5516	0.0955	0.0216	-0.4713	-1.5516	2	1	1	0
Q9QXY1	Tjp3	-2.4647	-0.6027	-1.4517	-1.2872	-2.4647	-0.6027	-1.4517	-1.2872	2	1	1	0
Q9QXY6	Ehd3	0.315	-0.0879	0.8381	-1.7285	0.315	-0.0879	0.8381	-1.7285	2	1	1	0
Q9QY76	Vapb	1.3172	0.9392	-2.7779	-1.1764	1.3172	0.9392	-2.7779	-1.1764	2	1	1	0
Q9QYG0	Ndrg2	-0.3719	-0.8553	-1.0997	-2.3215	-0.3719	-0.8553	-1.0997	-2.3215	2	1	1	0
Q9QZD9	Eif3i	-0.1825	-0.2102	-2.0491	-1.144	-0.1825	-0.2102	-2.0491	-1.144	2	1	1	0
Q9QZQ1	Afdn	-0.3501	0.3885	-1.8422	0.2917	-0.3501	0.3885	-1.8422	0.2917	2	1	1	0
Q9QZS3	Numb	-0.0032	0.094	-2.4069	-1.1399	-0.0032	0.094	-2.4069	-1.1399	2	1	1	0
Q9R098	Hgfac	0.5219	0.1627	-1.778	-1.4514	0.5219	0.1627	-1.778	-1.4514	2	1	1	0
Q9R0P3	Esd	0.7235	-0.757	-1.3915	-2.7579	0.7235	-0.757	-1.3915	-2.7579	2	1	1	0
Q9R117	Tyk2	-0.2547	0.6353	-0.5025	-2.3345	-0.2547	0.6353	-0.5025	-2.3345	2	1	1	0
Q9R1P0	Psma4	0.1692	-0.5402	-1.2692	-3.5018	0.1692	-0.5402	-1.2692	-3.5018	2	1	1	0
Q9R1P1	Psmb3	0.7874	0.3143	0.1119	-1.7227	0.7874	0.3143	0.1119	-1.7227	2	1	1	0
Q9WTP6	Ak2	-0.1477	-0.0358	-1.9737	-1.3838	-0.1477	-0.0358	-1.9737	-1.3838	2	1	1	0
Q9WTP7	Ak3	0.6077	0.0213	-1.5051	-1.4128	0.6077	0.0213	-1.5051	-1.4128	2	1	1	0
Q9WU78	Pdcd6ip	-0.2308	-0.6051	-0.8539	-2.1515	-0.2308	-0.6051	-0.8539	-2.1515	2	1	1	0
Q9WVA3	Bub3	-0.2126	0.0743	-2.636	-0.5865	-0.2126	0.0743	-2.636	-0.5865	2	1	1	0
Q9WVJ2	Psmd13	0.0222	-0.7509	-0.4493	-2.6923	0.0222	-0.7509	-0.4493	-2.6923	2	1	1	0
Q9WVL0	Gstz1	0.7614	-0.0015	-0.7363	-2.2174	0.7614	-0.0015	-0.7363	-2.2174	2	1	1	0
Q9WVT6	Ca14	-0.9413	-1.2976	-1.3524	-2.8953	-0.9413	-1.2976	-1.3524	-2.8953	2	1	1	0
Q9Z126	Pf4	-0.9852	-0.9316	-0.3478	-1.6247	-0.9852	-0.9316	-0.3478	-1.6247	2	1	1	0
Q9Z1J3	Nfs1	0.0577	-0.4448	-1.4207	-1.6954	0.0577	-0.4448	-1.4207	-1.6954	2	1	1	0
Q9Z1P6	Ndufa7	-0.8161	0.1253	-1.5989	-0.4971	-0.8161	0.1253	-1.5989	-0.4971	2	1	1	0
Q9Z2G9	Htatip2	-0.3239	0.698	-1.5825	-1.3396	-0.3239	0.698	-1.5825	-1.3396	2	1	1	0
Q9Z2M7	Pmm2	0.4128	0.549	-0.5463	-2.73	0.4128	0.549	-0.5463	-2.73	2	1	1	0
Q9Z2U0	Psma7	0.0628	-0.4527	-1.5691	-0.8448	0.0628	-0.4527	-1.5691	-0.8448	2	1	1	0
Q9Z2V4	Pck1	1.2882	0.3785	0.7077	-1.7969	1.2882	0.3785	0.7077	-1.7969	2	1	1	0
Q9Z2Y8	Plpbp	0.5908	0.41	-0.9266	-1.5058	0.5908	0.41	-0.9266	-1.5058	2	1	1	0
A2AIL4	Ndufaf6	0.7088	-0.0246	-0.2136	-0.6302	0.7088	-0.0246	-0.2136	-0.6302	2	1	1	0
A2CG49	Kalrn	-0.5356	0.38	-1.3277	-0.1217	-0.5356	0.38	-1.3277	-0.1217	2	1	1	0
B2RPV6	Mmrn1	0.1145	-0.3331	-0.1885	-0.821	0.1145	-0.3331	-0.1885	-0.821	2	1	1	0
B9EJ86	Osbpl8	-0.0148	0.114	-1.0698	-0.3385	-0.0148	0.114	-1.0698	-0.3385	2	1	1	0
C0HKE2	Hist1h2ac	-0.0832	-0.9287	-0.4734	-0.7902	-0.0832	-0.9287	-0.4734	-0.7902	2	1	1	0
C0HKE3	Hist1h2ad	-0.0319	-0.9961	-0.3372	-0.8301	-0.0319	-0.9961	-0.3372	-0.8301	2	1	1	0
C0HKE4	Hist1h2ae	-0.0019	-0.9049	-0.4596	-0.7889	-0.0019	-0.9049	-0.4596	-0.7889	2	1	1	0
C0HKE5	Hist1h2ag	-0.0577	-1.0454	-0.4974	-0.8969	-0.0577	-1.0454	-0.4974	-0.8969	2	1	1	0
C0HKE6	Hist1h2ai	0.0382	-0.9722	-0.3593	-0.7543	0.0382	-0.9722	-0.3593	-0.7543	2	1	1	0
C0HKE7	Hist1h2an	-0.15	-0.9256	-0.4773	-0.7905	-0.15	-0.9256	-0.4773	-0.7905	2	1	1	0
C0HKE8	Hist1h2ao	-0.063	-0.9449	-0.3776	-0.7667	-0.063	-0.9449	-0.3776	-0.7667	2	1	1	0
C0HKE9	Hist1h2ap	0.0167	-0.9474	-0.4031	-0.8613	0.0167	-0.9474	-0.4031	-0.8613	2	1	1	0
E9QAT4	Sec16a	0.3034	-0.0216	-0.0093	-0.8821	0.3034	-0.0216	-0.0093	-0.8821	2	1	1	0
O08599	Stxbp1	-1.3288	-0.4006	-0.479	-1.4722	-1.3288	-0.4006	-0.479	-1.4722	2	1	1	0
O08600	Endog	-0.0368	-0.3489	-0.4726	-0.6683	-0.0368	-0.3489	-0.4726	-0.6683	2	1	1	0
O08738	Casp6	-0.8797	0.7475	-1.1901	-0.2455	-0.8797	0.7475	-1.1901	-0.2455	2	1	1	0
O08756	Hsd17b10	0.2255	0.1283	-1.4536	-0.8902	0.2255	0.1283	-1.4536	-0.8902	2	1	1	0
O09044	Snap23	-0.3896	-0.1374	-0.2392	-0.7868	-0.3896	-0.1374	-0.2392	-0.7868	2	1	1	0
O09117	Sypl1	-0.5701	-0.5851	-1.1212	0.7652	-0.5701	-0.5851	-1.1212	0.7652	2	1	1	0
O35098	Dpysl4	0.358	0.3822	-0.3815	-1.4769	0.358	0.3822	-0.3815	-1.4769	2	1	1	0
O35435	Dhodh	0.1756	0.1144	-0.1208	-1.3635	0.1756	0.1144	-0.1208	-1.3635	2	1	1	0
O35490	Bhmt	-0.1001	-0.1593	-1.3037	-1.4561	-0.1001	-0.1593	-1.3037	-1.4561	2	1	1	0
O35643	Ap1b1	-0.6952	-0.6991	-1.1472	0.1052	-0.6952	-0.6991	-1.1472	0.1052	2	1	1	0
O35682	Myadm	-1.1425	0.5963	-0.2073	-1.2348	-1.1425	0.5963	-0.2073	-1.2348	2	1	1	0
O35955	Psmb10	0.3721	-1.0402	-0.5182	-1.4158	0.3721	-1.0402	-0.5182	-1.4158	2	1	1	0
O35972	Mrpl23	-0.6632	-1.1594	-0.9993	-0.6006	-0.6632	-1.1594	-0.9993	-0.6006	2	1	1	0
O54750	Cyp2j6	0.1933	-0.8926	-0.8431	0.0621	0.1933	-0.8926	-0.8431	0.0621	2	1	1	0
O54865	Gucy1b1	0.3398	-0.7025	0.0311	0.113	0.3398	-0.7025	0.0311	0.113	2	1	1	0
O54984	Asna1	-0.3847	0.8375	-1.3148	-0.052	-0.3847	0.8375	-1.3148	-0.052	2	1	1	0
O55013	Trappc3	-0.6902	-0.4601	-1.3028	-0.4372	-0.6902	-0.4601	-1.3028	-0.4372	2	1	1	0
O55143	Atp2a2	-0.3498	0.0036	-1.1695	-0.519	-0.3498	0.0036	-1.1695	-0.519	2	1	1	0
O70200	Aif1	-0.4088	-1.3193	-1.3445	-0.6432	-0.4088	-1.3193	-1.3445	-0.6432	2	1	1	0
O70318	Epb41l2	-1.2078	-0.4427	-1.3851	0.0366	-1.2078	-0.4427	-1.3851	0.0366	2	1	1	0
O70439	Stx7	0.2277	-0.409	-0.2931	-0.1212	0.2277	-0.409	-0.2931	-0.1212	2	1	1	0
O70585	Dtnb	-0.2274	-0.5126	-0.3662	0.1739	-0.2274	-0.5126	-0.3662	0.1739	2	1	1	0
O88428	Papss2	0.4467	-0.4406	-1.3587	-0.8686	0.4467	-0.4406	-1.3587	-0.8686	2	1	1	0
O88531	Ppt1	0.5265	-0.8177	-0.1197	0.4304	0.5265	-0.8177	-0.1197	0.4304	2	1	1	0
O88597	Becn1	1.3209	-1.1273	-0.1879	-0.6763	1.3209	-1.1273	-0.1879	-0.6763	2	1	1	0
O88630	Gosr1	0.8203	-0.7735	-0.0789	-1.3032	0.8203	-0.7735	-0.0789	-1.3032	2	1	1	0
O88696	Clpp	-0.2002	-0.1564	-0.2118	-0.8844	-0.2002	-0.1564	-0.2118	-0.8844	2	1	1	0
O88851	Rbbp9	0.9671	-0.3978	-0.393	-1.2328	0.9671	-0.3978	-0.393	-1.2328	2	1	1	0
O88947	F10	0.6166	-0.439	-0.9539	-0.7204	0.6166	-0.439	-0.9539	-0.7204	2	1	1	0
O88986	Gcat	0.4487	-0.367	-0.2059	-0.8963	0.4487	-0.367	-0.2059	-0.8963	2	1	1	0
P00688	Amy2	-1.3364	-1.2691	-0.8639	-1.1564	-1.3364	-1.2691	-0.8639	-1.1564	2	1	1	0
P01645	NoGeneName	0.1472	-0.6686	-0.4051	0.1853	0.1472	-0.6686	-0.4051	0.1853	2	1	1	0
P01867	Igh-3	-1.1092	-0.5693	-0.666	-0.7767	-1.1092	-0.5693	-0.666	-0.7767	2	1	1	0
P01942	Hba	-0.5414	0.1551	-1.2163	-0.6587	-0.5414	0.1551	-1.2163	-0.6587	2	1	1	0
P03930	Mtatp8	0.9716	-0.8607	-0.1536	-0.2396	0.9716	-0.8607	-0.1536	-0.2396	2	1	1	0
P05202	Got2	0.238	0.1679	-1.1989	-1.2614	0.238	0.1679	-1.1989	-1.2614	2	1	1	0
P05208	Cela2a	0.4958	-0.4757	-0.1599	-0.1739	0.4958	-0.4757	-0.1599	-0.1739	2	1	1	0
P06330	NoGeneName	0.1359	-0.1346	-0.2265	-0.2773	0.1359	-0.1346	-0.2265	-0.2773	2	1	1	0
P07724	Alb	-0.1879	-0.1313	-1.3677	-0.8345	-0.1879	-0.1313	-1.3677	-0.8345	2	1	1	0
P09671	Sod2	0.1023	-0.6427	-0.5908	-0.5086	0.1023	-0.6427	-0.5908	-0.5086	2	1	1	0
P10126	Eef1a1	0.2008	0.2779	-1.0503	-0.7082	0.2008	0.2779	-1.0503	-0.7082	2	1	1	0
P10833	Rras	-0.299	-0.4703	-0.8754	-0.9828	-0.299	-0.4703	-0.8754	-0.9828	2	1	1	0
P11725	Otc	-0.0366	-0.3576	-0.1235	-0.8276	-0.0366	-0.3576	-0.1235	-0.8276	2	1	1	0
P12382	Pfkl	0.3116	-0.8495	-0.1456	-0.9322	0.3116	-0.8495	-0.1456	-0.9322	2	1	1	0
P14152	Mdh1	-0.017	-0.2689	-1.1182	-1.1511	-0.017	-0.2689	-1.1182	-1.1511	2	1	1	0
P14206	Rpsa	0.2109	-0.0727	-1.4026	-1.323	0.2109	-0.0727	-1.4026	-1.323	2	1	1	0
P14685	Psmd3	0.0009	-0.1536	-0.334	-0.2467	0.0009	-0.1536	-0.334	-0.2467	2	1	1	0
P15116	Cdh2	-0.1224	0.2554	-1.0496	-1.0909	-0.1224	0.2554	-1.0496	-1.0909	2	1	1	0
P15208	Insr	-0.407	-0.7125	-0.7047	-0.4307	-0.407	-0.7125	-0.7047	-0.4307	2	1	1	0
P16125	Ldhb	0.0084	-0.8871	-0.2889	-1.0586	0.0084	-0.8871	-0.2889	-1.0586	2	1	1	0
P17427	Ap2a2	-0.9482	-0.5333	-0.757	-0.2526	-0.9482	-0.5333	-0.757	-0.2526	2	1	1	0
P18572	Bsg	-1.3525	-1.0064	-1.3126	-1.2307	-1.3525	-1.0064	-1.3126	-1.2307	2	1	1	0
P19324	Serpinh1	-0.7897	-0.6473	-0.705	-0.7998	-0.7897	-0.6473	-0.705	-0.7998	2	1	1	0
P19536	Cox5b	0.2994	0.5216	-0.8349	-1.0635	0.2994	0.5216	-0.8349	-1.0635	2	1	1	0
P22315	Fech	-0.0858	-0.3545	-0.6896	-0.5544	-0.0858	-0.3545	-0.6896	-0.5544	2	1	1	0
P23589	Ca5a	0.2527	-0.2896	-0.3853	-0.8141	0.2527	-0.2896	-0.3853	-0.8141	2	1	1	0
P24527	Lta4h	0.5613	-0.2317	-0.1689	-0.8742	0.5613	-0.2317	-0.1689	-0.8742	2	1	1	0
P25444	Rps2	-0.1087	-0.4603	-0.2336	0.3423	-0.1087	-0.4603	-0.2336	0.3423	2	1	1	0
P26040	Ezr	-0.5853	-0.0547	-1.0134	0.266	-0.5853	-0.0547	-1.0134	0.266	2	1	1	0
P26262	Klkb1	-1.4898	-0.1552	-1.0299	-1.4574	-1.4898	-0.1552	-1.0299	-1.4574	2	1	1	0
P27661	H2afx	0.0216	-1.0566	-0.5839	-0.8667	0.0216	-1.0566	-0.5839	-0.8667	2	1	1	0
P28063	Psmb8	-0.163	0.1014	-0.6435	-0.3803	-0.163	0.1014	-0.6435	-0.3803	2	1	1	0
P28352	Apex1	-1.4385	-0.8173	-0.5818	-1.3743	-1.4385	-0.8173	-0.5818	-1.3743	2	1	1	0
P28667	Marcksl1	-0.7911	-0.7241	-0.9565	0.4229	-0.7911	-0.7241	-0.9565	0.4229	2	1	1	0
P28825	Mep1a	-1.4104	0.7277	-0.5341	-0.3168	-1.4104	0.7277	-0.5341	-0.3168	2	1	1	0
P29341	Pabpc1	0.4917	0.4992	-1.4381	-1.0525	0.4917	0.4992	-1.4381	-1.0525	2	1	1	0
P30115	Gsta3	0.5737	0.5948	-0.1208	-1.3365	0.5737	0.5948	-0.1208	-1.3365	2	1	1	0
P32233	Drg1	-0.467	-0.0249	-0.6624	0.3566	-0.467	-0.0249	-0.6624	0.3566	2	1	1	0
P35123	Usp4	-0.4329	0.6766	-0.7562	-0.1083	-0.4329	0.6766	-0.7562	-0.1083	2	1	1	0
P35235	Ptpn11	0.148	-0.7498	-0.5514	-0.1625	0.148	-0.7498	-0.5514	-0.1625	2	1	1	0
P35441	Thbs1	-0.9269	-0.8322	-1.0336	-1.4414	-0.9269	-0.8322	-1.0336	-1.4414	2	1	1	0
P35486	Pdha1	0.1491	-0.5515	-0.3411	-0.6936	0.1491	-0.5515	-0.3411	-0.6936	2	1	1	0
P35505	Fah	0.1823	-0.0745	-0.6985	-0.5232	0.1823	-0.0745	-0.6985	-0.5232	2	1	1	0
P38060	Hmgcl	0.3499	-0.323	-0.2593	-0.4208	0.3499	-0.323	-0.2593	-0.4208	2	1	1	0
P39053	Dnm1	0.2232	-0.3871	-0.2172	-0.0792	0.2232	-0.3871	-0.2172	-0.0792	2	1	1	0
P45952	Acadm	0.3242	-0.0324	-0.9661	-1.1129	0.3242	-0.0324	-0.9661	-1.1129	2	1	1	0
P46656	Fdx1	-0.2484	-0.1717	-0.3113	-0.6544	-0.2484	-0.1717	-0.3113	-0.6544	2	1	1	0
P47757	Capzb	0.3345	-0.4526	-0.2307	-0.5387	0.3345	-0.4526	-0.2307	-0.5387	2	1	1	0
P47791	Gsr	-0.1606	-0.4979	-0.3494	-0.571	-0.1606	-0.4979	-0.3494	-0.571	2	1	1	0
P49710	Hcls1	0.9169	-0.7733	0.3547	-0.4784	0.9169	-0.7733	0.3547	-0.4784	2	1	1	0
P50171	Hsd17b8	0.2336	0.1565	-1.0849	-1.0611	0.2336	0.1565	-1.0849	-1.0611	2	1	1	0
P50236	Sult2a2	0.0992	0.1972	-0.9775	-1.3655	0.0992	0.1972	-0.9775	-1.3655	2	1	1	0
P50446	Krt6a	-0.9344	-0.0658	-0.6773	-0.9807	-0.9344	-0.0658	-0.6773	-0.9807	2	1	1	0
P51175	Ppox	-0.3735	-0.2121	-0.8161	-0.9393	-0.3735	-0.2121	-0.8161	-0.9393	2	1	1	0
P51660	Hsd17b4	-0.2043	0.533	-0.8727	-0.7121	-0.2043	0.533	-0.8727	-0.7121	2	1	1	0
P51855	Gss	0.7824	-0.1216	0.3125	-0.8116	0.7824	-0.1216	0.3125	-0.8116	2	1	1	0
P52196	Tst	0.6782	0.2878	-0.8589	-1.2599	0.6782	0.2878	-0.8589	-1.2599	2	1	1	0
P52503	Ndufs6	0.4834	0.0483	-0.9784	-0.8727	0.4834	0.0483	-0.9784	-0.8727	2	1	1	0
P52760	Rida	0.212	-0.3468	-0.2492	-0.4615	0.212	-0.3468	-0.2492	-0.4615	2	1	1	0
P52843	Sult2a1	-1.3177	0.2601	-0.8468	-1.4384	-1.3177	0.2601	-0.8468	-1.4384	2	1	1	0
P53395	Dbt	0.0808	-0.3725	-0.9164	-1.1481	0.0808	-0.3725	-0.9164	-1.1481	2	1	1	0
P54116	Stom	-0.8604	-0.7086	-0.7021	-0.0167	-0.8604	-0.7086	-0.7021	-0.0167	2	1	1	0
P55258	Rab8a	0.6859	-0.1783	-0.9296	-1.3737	0.6859	-0.1783	-0.9296	-1.3737	2	1	1	0
P58059	Mrps21	-0.8805	0.1191	-0.4538	-1.1436	-0.8805	0.1191	-0.4538	-1.1436	2	1	1	0
P58281	Opa1	-0.4545	0.0554	-1.1629	-0.8167	-0.4545	0.0554	-1.1629	-0.8167	2	1	1	0
P59325	Eif5	0.5315	0.2755	-0.1042	-1.1558	0.5315	0.2755	-0.1042	-1.1558	2	1	1	0
P60229	Eif3e	-0.1895	0.6065	-1.1464	-0.5924	-0.1895	0.6065	-1.1464	-0.5924	2	1	1	0
P60335	Pcbp1	1.0147	0.433	-0.6011	-1.239	1.0147	0.433	-0.6011	-1.239	2	1	1	0
P60867	Rps20	-0.7754	-1.0714	-1.0517	0.0485	-0.7754	-1.0714	-1.0517	0.0485	2	1	1	0
P61028	Rab8b	0.0048	-0.3321	-1.1838	-1.4794	0.0048	-0.3321	-1.1838	-1.4794	2	1	1	0
P61089	Ube2n	0.9305	0.2561	-1.1141	-1.4431	0.9305	0.2561	-1.1141	-1.4431	2	1	1	0
P62075	Timm13	0.0884	-0.1575	-0.5783	-0.5804	0.0884	-0.1575	-0.5783	-0.5804	2	1	1	0
P62281	Rps11	-0.1536	-0.4901	-0.3546	-0.053	-0.1536	-0.4901	-0.3546	-0.053	2	1	1	0
P62301	Rps13	-0.097	0.3202	-0.7748	-0.4025	-0.097	0.3202	-0.7748	-0.4025	2	1	1	0
P62334	Psmc6	-0.431	0.0195	-0.4551	-1.09	-0.431	0.0195	-0.4551	-1.09	2	1	1	0
P62702	Rps4x	-0.2368	-0.4771	-0.823	0.4127	-0.2368	-0.4771	-0.823	0.4127	2	1	1	0
P62849	Rps24	-0.4636	0.2616	-1.0683	-0.5266	-0.4636	0.2616	-1.0683	-0.5266	2	1	1	0
P62897	Cycs	-0.3955	-0.7108	-0.4521	-0.7253	-0.3955	-0.7108	-0.4521	-0.7253	2	1	1	0
P63030	Mpc1	-0.3022	0.3619	-0.8853	-0.3814	-0.3022	0.3619	-0.8853	-0.3814	2	1	1	0
P63276	Rps17	0.1801	-0.331	-0.8285	-0.3437	0.1801	-0.331	-0.8285	-0.3437	2	1	1	0
P63323	Rps12	1.2929	-0.3609	-1.1898	-0.5435	1.2929	-0.3609	-1.1898	-0.5435	2	1	1	0
P68033	Actc1	0.8783	0.1178	-0.036	-1.2575	0.8783	0.1178	-0.036	-1.2575	2	1	1	0
P70245	Ebp	-0.101	-0.0439	-1.1885	0.4334	-0.101	-0.0439	-1.1885	0.4334	2	1	1	0
P70372	Elavl1	-0.9491	-0.1907	-0.4091	-1.0999	-0.9491	-0.1907	-0.4091	-1.0999	2	1	1	0
P70404	Idh3g	-0.8174	-0.573	-1.0298	-0.4825	-0.8174	-0.573	-1.0298	-0.4825	2	1	1	0
P70670	Naca	0.0778	-0.0113	-1.4735	-1.0867	0.0778	-0.0113	-1.4735	-1.0867	2	1	1	0
P84091	Ap2m1	-0.8099	-0.4261	-1.0262	-0.0706	-0.8099	-0.4261	-1.0262	-0.0706	2	1	1	0
P85094	Isoc2a	0.3953	-0.1828	0.0149	-0.8073	0.3953	-0.1828	0.0149	-0.8073	2	1	1	0
P97298	Serpinf1	-0.4311	0.1141	-0.0918	-0.9557	-0.4311	0.1141	-0.0918	-0.9557	2	1	1	0
P97328	Khk	0.3198	-0.4112	0.7063	-1.3441	0.3198	-0.4112	0.7063	-1.3441	2	1	1	0
P97351	Rps3a	0.3766	-0.4617	-0.9046	-0.1548	0.3766	-0.4617	-0.9046	-0.1548	2	1	1	0
P97390	Vps45	0.7245	-0.6059	-0.8139	-0.8905	0.7245	-0.6059	-0.8139	-0.8905	2	1	1	0
P97450	Atp5pf	-0.1972	0.1254	-0.9243	-1.2902	-0.1972	0.1254	-0.9243	-1.2902	2	1	1	0
P97807	Fh	0.521	-0.0713	-1.2705	-1.3397	0.521	-0.0713	-1.2705	-1.3397	2	1	1	0
P99024	Tubb5	-1.1424	0.4489	-1.3264	0.1737	-1.1424	0.4489	-1.3264	0.1737	2	1	1	0
P99028	Uqcrh	-0.454	-0.0277	-0.1362	-1.1429	-0.454	-0.0277	-0.1362	-1.1429	2	1	1	0
Q00623	Apoa1	0.0899	-0.3564	-0.5737	-0.0921	0.0899	-0.3564	-0.5737	-0.0921	2	1	1	0
Q00915	Rbp1	0.1344	0.5823	-0.938	-1.1944	0.1344	0.5823	-0.938	-1.1944	2	1	1	0
Q00993	Axl	-0.8745	0.482	-0.9844	-0.0641	-0.8745	0.482	-0.9844	-0.0641	2	1	1	0
Q01237	Hmgcr	-1.0584	-0.2704	-0.5917	-0.3215	-1.0584	-0.2704	-0.5917	-0.3215	2	1	1	0
Q01339	Apoh	-0.0725	-0.5134	-1.4651	-0.6309	-0.0725	-0.5134	-1.4651	-0.6309	2	1	1	0
Q03265	Atp5f1a	0.2667	0.0814	-1.3277	-1.372	0.2667	0.0814	-1.3277	-1.372	2	1	1	0
Q04857	Col6a1	-0.307	-0.3038	-0.7338	-0.8962	-0.307	-0.3038	-0.7338	-0.8962	2	1	1	0
Q05186	Rcn1	-0.5102	-0.6158	-0.6144	-1.4367	-0.5102	-0.6158	-0.6144	-1.4367	2	1	1	0
Q07417	Acads	0.1489	-0.3983	-0.0933	-0.4213	0.1489	-0.3983	-0.0933	-0.4213	2	1	1	0
Q08761	Pros1	0.4755	-0.935	-0.5922	-0.6595	0.4755	-0.935	-0.5922	-0.6595	2	1	1	0
Q11136	Pepd	-0.0315	-0.8319	-1.225	-0.2662	-0.0315	-0.8319	-1.225	-0.2662	2	1	1	0
Q14CH1	Mocos	-1.1072	-0.8486	-0.7896	-0.9938	-1.1072	-0.8486	-0.7896	-0.9938	2	1	1	0
Q14CH7	Aars2	-0.2844	-0.4513	-0.8998	-0.8037	-0.2844	-0.4513	-0.8998	-0.8037	2	1	1	0
Q19LI2	A1bg	-1.1101	0.6059	-0.6632	-0.8519	-1.1101	0.6059	-0.6632	-0.8519	2	1	1	0
Q2NL51	Gsk3a	-0.415	0.2696	0.0894	-0.5511	-0.415	0.2696	0.0894	-0.5511	2	1	1	0
Q3SXB8	Colec11	0.0408	-1	-0.2652	-1.0672	0.0408	-1	-0.2652	-1.0672	2	1	1	0
Q3TC72	Fahd2	0.1212	-0.064	-0.3163	-0.5483	0.1212	-0.064	-0.3163	-0.5483	2	1	1	0
Q3TDD9	Ppp1r21	-0.9273	0.2804	-0.1081	-1.0189	-0.9273	0.2804	-0.1081	-1.0189	2	1	1	0
Q3TLP5	Echdc2	0.3234	-0.2486	-0.4023	-0.5001	0.3234	-0.2486	-0.4023	-0.5001	2	1	1	0
Q3TRM4	Pnpla6	0.7182	-0.1894	-0.2431	-0.3944	0.7182	-0.1894	-0.2431	-0.3944	2	1	1	0
Q3UFY8	Trmt10c	0.3845	-0.3015	0.0753	-1.082	0.3845	-0.3015	0.0753	-1.082	2	1	1	0
Q3UHJ0	Aak1	0.238	0.8891	-1.1685	-1.0943	0.238	0.8891	-1.1685	-1.0943	2	1	1	0
Q3ULD5	Mccc2	0.3928	0.0466	-0.6352	-1.1587	0.3928	0.0466	-0.6352	-1.1587	2	1	1	0
Q3UM29	Cog7	0.585	-0.3285	-0.8254	0.0725	0.585	-0.3285	-0.8254	0.0725	2	1	1	0
Q3UNZ8	Cryzl2	0.286	-0.1309	-0.6358	-0.9172	0.286	-0.1309	-0.6358	-0.9172	2	1	1	0
Q3UPL0	Sec31a	0.2917	-0.5401	-0.5237	-1.0398	0.2917	-0.5401	-0.5237	-1.0398	2	1	1	0
Q3URE1	Acsf3	-0.277	-0.3044	-0.552	-0.6387	-0.277	-0.3044	-0.552	-0.6387	2	1	1	0
Q3UUI3	Them4	0.9279	-0.0282	-0.5418	-1.06	0.9279	-0.0282	-0.5418	-1.06	2	1	1	0
Q3UUQ7	Pgap1	-0.2944	0.1858	-0.8349	-0.7027	-0.2944	0.1858	-0.8349	-0.7027	2	1	1	0
Q3UZ39	Lrrfip1	-0.5996	-1.4706	-0.8803	-0.6894	-0.5996	-1.4706	-0.8803	-0.6894	2	1	1	0
Q570Y9	Deptor	-0.2109	-1.247	-0.3455	-0.7366	-0.2109	-1.247	-0.3455	-0.7366	2	1	1	0
Q5H8C4	Vps13a	0.0576	-0.4386	-0.0996	-0.7958	0.0576	-0.4386	-0.0996	-0.7958	2	1	1	0
Q5MJS3	Fam20c	0.1853	-0.6412	-0.1209	0.3615	0.1853	-0.6412	-0.1209	0.3615	2	1	1	0
Q5XJY5	Arcn1	0.5346	-0.3459	-0.6571	-0.9536	0.5346	-0.3459	-0.6571	-0.9536	2	1	1	0
Q60790	Rasa3	-0.4165	0.0841	-0.4154	0.0496	-0.4165	0.0841	-0.4154	0.0496	2	1	1	0
Q60865	Caprin1	-0.6279	-0.8314	-1.0201	0.1043	-0.6279	-0.8314	-1.0201	0.1043	2	1	1	0
Q60936	Coq8a	0.3705	-0.3615	-0.1444	-0.7985	0.3705	-0.3615	-0.1444	-0.7985	2	1	1	0
Q61107	Gbp4	-0.3887	0.6716	-0.6717	-0.5752	-0.3887	0.6716	-0.6717	-0.5752	2	1	1	0
Q61171	Prdx2	-0.2785	0.3262	-0.8266	-0.2457	-0.2785	0.3262	-0.8266	-0.2457	2	1	1	0
Q61210	Arhgef1	0.2566	-0.3193	-0.9889	-0.706	0.2566	-0.3193	-0.9889	-0.706	2	1	1	0
Q61425	Hadh	0.7332	-0.1542	-0.9729	-1.1229	0.7332	-0.1542	-0.9729	-1.1229	2	1	1	0
Q61592	Gas6	-0.1457	0.9384	-0.9936	-0.7339	-0.1457	0.9384	-0.9936	-0.7339	2	1	1	0
Q61733	Mrps31	0.2153	-0.5781	-1.1174	-0.1959	0.2153	-0.5781	-1.1174	-0.1959	2	1	1	0
Q61739	Itga6	0.2243	-0.8938	-0.3012	-0.8314	0.2243	-0.8938	-0.3012	-0.8314	2	1	1	0
Q61768	Kif5b	-1.1611	0.079	-0.7533	-1.2458	-1.1611	0.079	-0.7533	-1.2458	2	1	1	0
Q61838	Pzp	1.3475	-0.2098	-0.8932	-0.5128	1.3475	-0.2098	-0.8932	-0.5128	2	1	1	0
Q61847	Mep1b	-0.5966	0.0048	-1.0182	0.5922	-0.5966	0.0048	-1.0182	0.5922	2	1	1	0
Q62165	Dag1	0.4437	-0.3814	-0.7998	0.1295	0.4437	-0.3814	-0.7998	0.1295	2	1	1	0
Q62178	Sema4a	-0.0524	-0.1246	-1.3392	-0.1527	-0.0524	-0.1246	-1.3392	-0.1527	2	1	1	0
Q62417	Sorbs1	-0.955	-0.418	-0.7116	-0.3386	-0.955	-0.418	-0.7116	-0.3386	2	1	1	0
Q64285	Cel	1.2895	-0.516	-1.0115	-0.5556	1.2895	-0.516	-1.0115	-0.5556	2	1	1	0
Q64433	Hspe1	0.4939	-0.0724	-1.4333	-1.4432	0.4939	-0.0724	-1.4333	-1.4432	2	1	1	0
Q64481	Cyp3a16	-0.9907	-0.2269	0.0182	-1.4242	-0.9907	-0.2269	0.0182	-1.4242	2	1	1	0
Q64516	Gk	0.0246	0.2061	-0.2716	-1.2967	0.0246	0.2061	-0.2716	-1.2967	2	1	1	0
Q64523	Hist2h2ac	0.0268	-0.9256	-0.4448	-0.8679	0.0268	-0.9256	-0.4448	-0.8679	2	1	1	0
Q69ZS7	Hbs1l	1.1974	-0.9478	-0.1462	-0.696	1.1974	-0.9478	-0.1462	-0.696	2	1	1	0
Q6GSS7	Hist2h2aa2	-0.002	-1.0672	-0.3134	-0.7801	-0.002	-1.0672	-0.3134	-0.7801	2	1	1	0
Q6NSR8	Npepl1	0.1316	-0.3908	-0.7618	-0.7963	0.1316	-0.3908	-0.7618	-0.7963	2	1	1	0
Q6PGB6	Naa50	1.0014	0.2078	-0.4289	-1.2691	1.0014	0.2078	-0.4289	-1.2691	2	1	1	0
Q6WVG3	Kctd12	-0.1971	-0.4016	-0.6356	-0.7871	-0.1971	-0.4016	-0.6356	-0.7871	2	1	1	0
Q6ZWN5	Rps9	-0.0935	-0.4931	-0.3875	0.2529	-0.0935	-0.4931	-0.3875	0.2529	2	1	1	0
Q6ZWX6	Eif2s1	-1.3571	-1.2211	-1.1349	-0.2727	-1.3571	-1.2211	-1.1349	-0.2727	2	1	1	0
Q78JN3	Eci3	-0.5405	-0.7801	-1.0402	-0.5409	-0.5405	-0.7801	-1.0402	-0.5409	2	1	1	0
Q78KK3	Slc22a18	-0.6266	-0.0431	-1.0617	0.6187	-0.6266	-0.0431	-1.0617	0.6187	2	1	1	0
Q7TMF3	Ndufa12	-0.0236	-0.3429	-0.5275	-0.4205	-0.0236	-0.3429	-0.5275	-0.4205	2	1	1	0
Q7TMV3	Fastkd5	0.5141	-0.8623	-0.3839	0.034	0.5141	-0.8623	-0.3839	0.034	2	1	1	0
Q7TMY8	Huwe1	1.1467	-0.5334	-0.4968	-1.4553	1.1467	-0.5334	-0.4968	-1.4553	2	1	1	0
Q7TNG8	Ldhd	0.0383	-0.0477	-1.2087	-1.1048	0.0383	-0.0477	-1.2087	-1.1048	2	1	1	0
Q80SY4	Mib1	-0.1092	-0.801	-0.7355	-0.3275	-0.1092	-0.801	-0.7355	-0.3275	2	1	1	0
Q80U63	Mfn2	-0.489	-0.5188	-0.474	-0.8423	-0.489	-0.5188	-0.474	-0.8423	2	1	1	0
Q80X19	Col14a1	-0.8422	-0.2829	-0.8963	-0.2727	-0.8422	-0.2829	-0.8963	-0.2727	2	1	1	0
Q80X85	Mrps7	-0.0588	-0.2632	-0.4965	-0.1769	-0.0588	-0.2632	-0.4965	-0.1769	2	1	1	0
Q80XR2	Atp2c1	-0.2378	0.7465	-0.9593	-0.0556	-0.2378	0.7465	-0.9593	-0.0556	2	1	1	0
Q80Y14	Glrx5	0.2704	-0.2213	-0.2564	-0.7325	0.2704	-0.2213	-0.2564	-0.7325	2	1	1	0
Q80ZS3	Mrps26	-0.3649	0.1055	-0.0969	-0.8244	-0.3649	0.1055	-0.0969	-0.8244	2	1	1	0
Q811D0	Dlg1	0.6097	-0.0349	0.0316	-1.1526	0.6097	-0.0349	0.0316	-1.1526	2	1	1	0
Q8BFU2	Hist3h2a	-0.0208	-0.8975	-0.4604	-0.7872	-0.0208	-0.8975	-0.4604	-0.7872	2	1	1	0
Q8BFY6	Pef1	0.4729	-0.6541	-0.0942	-0.1529	0.4729	-0.6541	-0.0942	-0.1529	2	1	1	0
Q8BG32	Psmd11	0.6742	-0.9451	-0.6054	-1.2545	0.6742	-0.9451	-0.6054	-1.2545	2	1	1	0
Q8BGC4	Zadh2	0.6441	0.2135	-0.5355	-1.1977	0.6441	0.2135	-0.5355	-1.1977	2	1	1	0
Q8BGQ4	Pomt2	0.2583	-0.1772	-1.0226	0.0439	0.2583	-0.1772	-1.0226	0.0439	2	1	1	0
Q8BH86	Dglucy	0.2501	0.0914	-0.6428	-1.1364	0.2501	0.0914	-0.6428	-1.1364	2	1	1	0
Q8BH95	Echs1	0.2403	0.0055	-1.2281	-1.3213	0.2403	0.0055	-1.2281	-1.3213	2	1	1	0
Q8BK03	Miga2	-0.2978	0.5477	-0.8984	-0.7696	-0.2978	0.5477	-0.8984	-0.7696	2	1	1	0
Q8BKF1	Polrmt	0.8882	-0.816	0.3478	-1.267	0.8882	-0.816	0.3478	-1.267	2	1	1	0
Q8BKZ9	Pdhx	0.1628	-0.2287	-0.6428	-0.9299	0.1628	-0.2287	-0.6428	-0.9299	2	1	1	0
Q8BMD6	Tmem260	-0.9924	-0.3753	-0.4955	-0.46	-0.9924	-0.3753	-0.4955	-0.46	2	1	1	0
Q8BMF4	Dlat	-0.4208	-0.771	-0.455	-0.652	-0.4208	-0.771	-0.455	-0.652	2	1	1	0
Q8BMS1	Hadha	-0.3034	-0.0012	-0.5535	-0.7026	-0.3034	-0.0012	-0.5535	-0.7026	2	1	1	0
Q8BRH0	Tmtc3	-1.2953	0.1729	-1.1722	-0.494	-1.2953	0.1729	-1.1722	-0.494	2	1	1	0
Q8BSE0	Rmdn2	-0.0489	0.1782	-1.4763	-1.2931	-0.0489	0.1782	-1.4763	-1.2931	2	1	1	0
Q8BSM7	Slc43a1	0.3858	-0.7924	-0.4279	-0.3192	0.3858	-0.7924	-0.4279	-0.3192	2	1	1	0
Q8BU14	Sec62	-0.2494	-0.4783	-0.8252	-0.2123	-0.2494	-0.4783	-0.8252	-0.2123	2	1	1	0
Q8BUK6	Hook3	-0.8796	-0.2776	-1.1929	-0.2667	-0.8796	-0.2776	-1.1929	-0.2667	2	1	1	0
Q8BWF0	Aldh5a1	0.3886	-0.3714	0.0304	-0.5092	0.3886	-0.3714	0.0304	-0.5092	2	1	1	0
Q8BWT1	Acaa2	0.8335	0.2586	-1.2628	-1.1048	0.8335	0.2586	-1.2628	-1.1048	2	1	1	0
Q8BXN7	Ppm1k	0.3701	-0.4901	-1.3172	-0.2644	0.3701	-0.4901	-1.3172	-0.2644	2	1	1	0
Q8BZZ3	Wwp1	-0.7622	0.3707	-0.3594	-1.3455	-0.7622	0.3707	-0.3594	-1.3455	2	1	1	0
Q8C1E7	Tmem120a	-0.8501	-0.1502	-0.909	0.9472	-0.8501	-0.1502	-0.909	0.9472	2	1	1	0
Q8C3X4	Guf1	0.1963	-0.4049	-0.7373	0.0679	0.1963	-0.4049	-0.7373	0.0679	2	1	1	0
Q8C5H8	Nadk2	0.0753	-0.2051	-0.1991	-0.6646	0.0753	-0.2051	-0.1991	-0.6646	2	1	1	0
Q8C7H1	Mmaa	0.054	-0.2055	-0.0591	-1.0651	0.054	-0.2055	-0.0591	-1.0651	2	1	1	0
Q8CAK1	Iba57	0.0507	-0.1376	-0.3809	-1.1463	0.0507	-0.1376	-0.3809	-1.1463	2	1	1	0
Q8CAQ8	Immt	-0.9177	-0.24	-0.7914	-0.8378	-0.9177	-0.24	-0.7914	-0.8378	2	1	1	0
Q8CAY6	Acat2	0.6398	-0.1657	-1.4845	-1.183	0.6398	-0.1657	-1.4845	-1.183	2	1	1	0
Q8CC88	Vwa8	-0.541	0.3382	-0.2693	-0.7646	-0.541	0.3382	-0.2693	-0.7646	2	1	1	0
Q8CFA2	Amt	0.5606	-0.139	-0.8064	-0.7593	0.5606	-0.139	-0.8064	-0.7593	2	1	1	0
Q8CGK3	Lonp1	-0.4335	0.1712	-0.8396	-1.1651	-0.4335	0.1712	-0.8396	-1.1651	2	1	1	0
Q8CGP5	Hist1h2af	0.0848	-0.8297	-0.4624	-0.9058	0.0848	-0.8297	-0.4624	-0.9058	2	1	1	0
Q8CGP6	Hist1h2ah	0.1033	-0.7274	-0.4216	-0.7335	0.1033	-0.7274	-0.4216	-0.7335	2	1	1	0
Q8CGP7	Hist1h2ak	-0.0335	-0.9221	-0.397	-0.7596	-0.0335	-0.9221	-0.397	-0.7596	2	1	1	0
Q8CHR6	Dpyd	0.4833	-0.4586	-0.1095	-1.1646	0.4833	-0.4586	-0.1095	-1.1646	2	1	1	0
Q8CHT0	Aldh4a1	0.0823	-0.4427	-0.658	-0.9593	0.0823	-0.4427	-0.658	-0.9593	2	1	1	0
Q8CI94	Pygb	-0.1818	-0.5226	-1.117	0.2233	-0.1818	-0.5226	-1.117	0.2233	2	1	1	0
Q8CJG0	Ago2	0.0092	-0.5105	-0.381	0.071	0.0092	-0.5105	-0.381	0.071	2	1	1	0
Q8JZQ2	Afg3l2	-0.2546	-0.0237	-0.9833	-1.4503	-0.2546	-0.0237	-0.9833	-1.4503	2	1	1	0
Q8JZS0	Lin7a	0.3154	-0.3572	0.1088	-0.86	0.3154	-0.3572	0.1088	-0.86	2	1	1	0
Q8K0Z7	Taco1	-0.3327	-0.372	-0.7464	-1.3287	-0.3327	-0.372	-0.7464	-1.3287	2	1	1	0
Q8K1N1	Pnpla8	-0.4765	0.1004	-0.7692	0.0076	-0.4765	0.1004	-0.7692	0.0076	2	1	1	0
Q8K268	Abcf3	0.5678	-1.1103	-0.0041	-1.1463	0.5678	-1.1103	-0.0041	-1.1463	2	1	1	0
Q8K2B3	Sdha	-0.8441	-0.4747	-0.8059	-1.0085	-0.8441	-0.4747	-0.8059	-1.0085	2	1	1	0
Q8K2C6	Sirt5	-0.2765	-0.3784	-1.1036	-0.2805	-0.2765	-0.3784	-1.1036	-0.2805	2	1	1	0
Q8K2C7	Os9	-0.3463	0.4074	-0.7626	-0.9338	-0.3463	0.4074	-0.7626	-0.9338	2	1	1	0
Q8K2L8	Trappc12	0.8671	-0.46	-0.2477	-0.9853	0.8671	-0.46	-0.2477	-0.9853	2	1	1	0
Q8K2Q9	Shtn1	0.7362	-1.0722	-0.9915	-0.0543	0.7362	-1.0722	-0.9915	-0.0543	2	1	1	0
Q8K370	Acad10	-0.0798	-0.2422	-0.3119	-0.2911	-0.0798	-0.2422	-0.3119	-0.2911	2	1	1	0
Q8K441	Abca6	0.768	-0.0526	-0.4769	-0.6055	0.768	-0.0526	-0.4769	-0.6055	2	1	1	0
Q8K4F5	Abhd11	-0.1032	-0.0449	-0.249	-0.8335	-0.1032	-0.0449	-0.249	-0.8335	2	1	1	0
Q8K4Z3	Naxe	0.1212	-0.2289	-0.372	-0.4103	0.1212	-0.2289	-0.372	-0.4103	2	1	1	0
Q8QZS1	Hibch	0.1555	-0.4385	-0.4186	-0.5771	0.1555	-0.4385	-0.4186	-0.5771	2	1	1	0
Q8QZT1	Acat1	0.4506	0.1211	-1.1037	-1.1195	0.4506	0.1211	-1.1037	-1.1195	2	1	1	0
Q8QZY2	Glyctk	0.3404	0.2043	-0.9278	-0.9585	0.3404	0.2043	-0.9278	-0.9585	2	1	1	0
Q8R010	Aimp2	-0.497	0.3477	-0.6254	-0.3399	-0.497	0.3477	-0.6254	-0.3399	2	1	1	0
Q8R035	Mrpl58	-0.6024	-0.3775	-1.2423	-0.906	-0.6024	-0.3775	-1.2423	-0.906	2	1	1	0
Q8R0F3	Sumf1	0.6587	-0.4896	-0.9787	-0.3461	0.6587	-0.4896	-0.9787	-0.3461	2	1	1	0
Q8R0F8	Fahd1	0.531	0.0102	-0.4233	-0.833	0.531	0.0102	-0.4233	-0.833	2	1	1	0
Q8R0N6	Adhfe1	0.4251	-0.2535	-0.9841	-0.8807	0.4251	-0.2535	-0.9841	-0.8807	2	1	1	0
Q8R1B4	Eif3c	-0.9424	-0.3381	-0.4987	-1.3361	-0.9424	-0.3381	-0.4987	-1.3361	2	1	1	0
Q8R1M2	H2afj	-0.0332	-0.9526	-0.4524	-0.8706	-0.0332	-0.9526	-0.4524	-0.8706	2	1	1	0
Q8R216	Sirt4	-0.8281	-0.1039	-0.9464	-1.0481	-0.8281	-0.1039	-0.9464	-1.0481	2	1	1	0
Q8R4U0	Stab2	-0.2521	0.1162	-0.6492	0.225	-0.2521	0.1162	-0.6492	0.225	2	1	1	0
Q8VC97	Upb1	0.9074	-0.8664	0.4413	-1.0059	0.9074	-0.8664	0.4413	-1.0059	2	1	1	0
Q8VD26	Tmem143	-1.0168	0.3438	-0.4295	-1.183	-1.0168	0.3438	-0.4295	-1.183	2	1	1	0
Q8VD65	Pik3r4	0.7138	-0.5735	0.4824	-0.3008	0.7138	-0.5735	0.4824	-0.3008	2	1	1	0
Q8VDC1	Fyco1	-1.1104	0.4901	-0.7199	0.0678	-1.1104	0.4901	-0.7199	0.0678	2	1	1	0
Q8VDK1	Nit1	0.5728	-0.0745	-0.2043	-1.0001	0.5728	-0.0745	-0.2043	-1.0001	2	1	1	0
Q8VDT9	Mrpl50	0.2938	-0.3398	-1.0735	-1.1121	0.2938	-0.3398	-1.0735	-1.1121	2	1	1	0
Q8VE22	Mrps23	0.0189	-0.2173	-1.1489	-1.091	0.0189	-0.2173	-1.1489	-1.091	2	1	1	0
Q8VE95	NoGeneName	0.2627	0.0083	-0.2026	-1.0641	0.2627	0.0083	-0.2026	-1.0641	2	1	1	0
Q91V92	Acly	0.3771	-0.5475	-0.2583	0.3882	0.3771	-0.5475	-0.2583	0.3882	2	1	1	0
Q91VA6	Poldip2	-0.0366	-0.1858	-0.6781	-1.1047	-0.0366	-0.1858	-0.6781	-1.1047	2	1	1	0
Q91VM9	Ppa2	0.0757	-0.2455	-0.3352	-0.6123	0.0757	-0.2455	-0.3352	-0.6123	2	1	1	0
Q91VN4	Chchd6	0.3447	-0.2906	-0.3552	-0.3647	0.3447	-0.2906	-0.3552	-0.3647	2	1	1	0
Q91VT4	Cbr4	0.2157	0.2652	-1.0977	-0.8351	0.2157	0.2652	-1.0977	-0.8351	2	1	1	0
Q91WE6	Cdkal1	0.9632	-0.0015	0.3886	-1.4696	0.9632	-0.0015	0.3886	-1.4696	2	1	1	0
Q91WK2	Eif3h	-0.5094	0.9444	-0.4682	-0.9459	-0.5094	0.9444	-0.4682	-0.9459	2	1	1	0
Q91X79	Cela1	0.2512	-1.4737	-0.6993	-0.7065	0.2512	-1.4737	-0.6993	-0.7065	2	1	1	0
Q91YT0	Ndufv1	-0.1156	-0.2429	-0.7663	-0.803	-0.1156	-0.2429	-0.7663	-0.803	2	1	1	0
Q91YT8	Tmem63a	-0.6387	0.9685	-1.1999	-0.3108	-0.6387	0.9685	-1.1999	-0.3108	2	1	1	0
Q921G7	Etfdh	0.0788	0.2292	-1.3033	-1.1243	0.0788	0.2292	-1.3033	-1.1243	2	1	1	0
Q922B1	Macrod1	0.2699	-0.3696	-1.1296	-0.9639	0.2699	-0.3696	-1.1296	-0.9639	2	1	1	0
Q925F2	Esam	0.8161	-0.3996	0.5979	-0.4555	0.8161	-0.3996	0.5979	-0.4555	2	1	1	0
Q99J87	Dhx58	0.8442	-0.2628	-0.3121	-0.7961	0.8442	-0.2628	-0.3121	-0.7961	2	1	1	0
Q99J94	Slco1a6	-0.2786	0.1385	-0.0862	-1.3354	-0.2786	0.1385	-0.0862	-1.3354	2	1	1	0
Q99J99	Mpst	0.1279	0.1133	-0.9785	-1.3663	0.1279	0.1133	-0.9785	-1.3663	2	1	1	0
Q99JR5	Tinagl1	0.1569	-1.0402	-0.2087	-1.196	0.1569	-1.0402	-0.2087	-1.196	2	1	1	0
Q99JR6	Nmnat3	0.6167	-0.4713	-0.6237	-0.8396	0.6167	-0.4713	-0.6237	-0.8396	2	1	1	0
Q99JY0	Hadhb	0.6885	0.4153	-1.4507	-1.1083	0.6885	0.4153	-1.4507	-1.1083	2	1	1	0
Q99K01	Pdxdc1	-0.5018	-0.3418	-0.4465	-0.7552	-0.5018	-0.3418	-0.4465	-0.7552	2	1	1	0
Q99KI0	Aco2	-0.1575	-0.3971	-0.7428	-0.869	-0.1575	-0.3971	-0.7428	-0.869	2	1	1	0
Q99KR7	Ppif	0.2331	-0.3913	-0.3519	-1.2556	0.2331	-0.3913	-0.3519	-1.2556	2	1	1	0
Q99L13	Hibadh	0.734	-0.1183	-0.8413	-0.7918	0.734	-0.1183	-0.8413	-0.7918	2	1	1	0
Q99L47	St13	0.3036	0.2972	-0.3963	-1.4717	0.3036	0.2972	-0.3963	-1.4717	2	1	1	0
Q99LC5	Etfa	0.1944	-0.3553	-0.8304	-1.244	0.1944	-0.3553	-0.8304	-1.244	2	1	1	0
Q99LC9	Pex6	0.0482	0.7939	-1.1901	-1.3638	0.0482	0.7939	-1.1901	-1.3638	2	1	1	0
Q99LP6	Grpel1	0.3202	-0.1689	-0.516	-1.4528	0.3202	-0.1689	-0.516	-1.4528	2	1	1	0
Q99MR8	Mccc1	0.1241	0	-1.2933	-0.8053	0.1241	0	-1.2933	-0.8053	2	1	1	0
Q99MZ7	Pecr	-0.2736	0.2811	-1.3464	-0.8089	-0.2736	0.2811	-1.3464	-0.8089	2	1	1	0
Q99N87	Mrps5	-0.2689	-0.1581	-1.0159	-0.4887	-0.2689	-0.1581	-1.0159	-0.4887	2	1	1	0
Q99N93	Mrpl16	-0.0577	0.475	-1.2658	-0.188	-0.0577	0.475	-1.2658	-0.188	2	1	1	0
Q99N94	Mrpl9	-0.5674	-0.4508	-0.8317	-0.8664	-0.5674	-0.4508	-0.8317	-0.8664	2	1	1	0
Q99NF1	Bco2	0.0256	-0.8275	-0.8	-0.3009	0.0256	-0.8275	-0.8	-0.3009	2	1	1	0
Q99PU8	Dhx30	-0.9291	-0.5802	-1.2872	0.2708	-0.9291	-0.5802	-1.2872	0.2708	2	1	1	0
Q9CPP6	Ndufa5	0.2491	-0.2407	-0.8935	-0.8567	0.2491	-0.2407	-0.8935	-0.8567	2	1	1	0
Q9CPQ1	Cox6c	-0.7512	0.1276	-0.6806	-1.1608	-0.7512	0.1276	-0.6806	-1.1608	2	1	1	0
Q9CQ75	Ndufa2	0.3899	0.5131	-1.0722	-1.392	0.3899	0.5131	-1.0722	-1.392	2	1	1	0
Q9CQF0	Mrpl11	-0.3168	-0.8556	-1.2815	-0.3496	-0.3168	-0.8556	-1.2815	-0.3496	2	1	1	0
Q9CQR4	Acot13	0.1285	-0.4475	-0.7223	-0.381	0.1285	-0.4475	-0.7223	-0.381	2	1	1	0
Q9CQW1	Ykt6	-1.2769	0.4796	-0.7967	-0.7958	-1.2769	0.4796	-0.7967	-0.7958	2	1	1	0
Q9CQZ0	Ormdl2	-0.1805	0.4339	-1.1958	-1.0464	-0.1805	0.4339	-1.1958	-1.0464	2	1	1	0
Q9CR24	Nudt8	0.7087	-0.0497	-0.6669	-1.0497	0.7087	-0.0497	-0.6669	-1.0497	2	1	1	0
Q9CXZ1	Ndufs4	0.3515	-0.1616	-1.1559	-0.884	0.3515	-0.1616	-1.1559	-0.884	2	1	1	0
Q9CY64	Blvra	0.1625	-0.7497	-0.5518	-0.2404	0.1625	-0.7497	-0.5518	-0.2404	2	1	1	0
Q9CYL5	Glipr2	-0.0339	-1.4635	-0.0205	-0.6768	-0.0339	-1.4635	-0.0205	-0.6768	2	1	1	0
Q9CYW4	Hdhd3	0.2432	-0.1133	-0.6014	-1.4361	0.2432	-0.1133	-0.6014	-1.4361	2	1	1	0
Q9CZ42	Naxd	0.7575	-0.228	-0.9206	-1.4814	0.7575	-0.228	-0.9206	-1.4814	2	1	1	0
Q9CZ44	Nsfl1c	0.6763	0.1872	-0.3078	-1.2771	0.6763	0.1872	-0.3078	-1.2771	2	1	1	0
Q9CZL5	Pcbd2	0.0809	-0.3027	-1.3383	-0.3654	0.0809	-0.3027	-1.3383	-0.3654	2	1	1	0
Q9CZN7	Shmt2	0.0511	-0.1667	-0.2959	-0.851	0.0511	-0.1667	-0.2959	-0.851	2	1	1	0
Q9D009	Lipt2	-0.1209	-1.3044	-0.1701	-0.7648	-0.1209	-1.3044	-0.1701	-0.7648	2	1	1	0
Q9D0M1	Prpsap1	-0.9733	-0.1061	-0.5454	-0.8967	-0.9733	-0.1061	-0.5454	-0.8967	2	1	1	0
Q9D172	Gatd3a	0.0754	0.3842	-0.8639	-1.4152	0.0754	0.3842	-0.8639	-1.4152	2	1	1	0
Q9D1H8	Mrpl53	-0.0559	-0.7095	-0.8187	-1.3595	-0.0559	-0.7095	-0.8187	-1.3595	2	1	1	0
Q9D1I5	Mcee	1.3179	-0.2033	-1.2011	-0.4706	1.3179	-0.2033	-1.2011	-0.4706	2	1	1	0
Q9D1P0	Mrpl13	-0.5588	0.1688	-0.3236	-0.9356	-0.5588	0.1688	-0.3236	-0.9356	2	1	1	0
Q9D1R9	Rpl34	0.0848	0.8005	-1.398	-0.5455	0.0848	0.8005	-1.398	-0.5455	2	1	1	0
Q9D3D9	Atp5f1d	-0.2215	-0.2206	-0.6129	-0.5919	-0.2215	-0.2206	-0.6129	-0.5919	2	1	1	0
Q9D404	Oxsm	0.3479	-0.0754	-0.8505	-0.7987	0.3479	-0.0754	-0.8505	-0.7987	2	1	1	0
Q9D4H1	Exoc2	-0.0112	-1.4048	-0.3545	-1.0442	-0.0112	-1.4048	-0.3545	-1.0442	2	1	1	0
Q9D6K5	Synj2bp	-0.785	-0.3636	-0.445	-1.1375	-0.785	-0.3636	-0.445	-1.1375	2	1	1	0
Q9D6Y7	Msra	0.7112	0.3905	-0.9881	-1.3497	0.7112	0.3905	-0.9881	-1.3497	2	1	1	0
Q9D7B6	Acad8	-0.0062	-0.1883	-0.1633	-0.3112	-0.0062	-0.1883	-0.1633	-0.3112	2	1	1	0
Q9D7J9	Echdc3	0.5262	0.1761	-1.2372	-1.0627	0.5262	0.1761	-1.2372	-1.0627	2	1	1	0
Q9D7P6	Iscu	0.3202	0.0642	-0.8986	-0.6845	0.3202	0.0642	-0.8986	-0.6845	2	1	1	0
Q9D826	Pipox	-0.3403	0.0951	-0.8927	-0.4315	-0.3403	0.0951	-0.8927	-0.4315	2	1	1	0
Q9D855	Uqcrb	-0.0908	-0.1347	-1.4094	-1.3947	-0.0908	-0.1347	-1.4094	-1.3947	2	1	1	0
Q9D8P4	Mrpl17	0.1509	-0.8621	-1.0604	-0.7315	0.1509	-0.8621	-1.0604	-0.7315	2	1	1	0
Q9D8S9	Bola1	-0.517	-0.0308	-0.4051	-1.2057	-0.517	-0.0308	-0.4051	-1.2057	2	1	1	0
Q9D8T7	Slirp	-0.154	0.038	-0.6294	-0.6471	-0.154	0.038	-0.6294	-0.6471	2	1	1	0
Q9D9V3	Echdc1	0.44	-0.3647	0.086	-0.4438	0.44	-0.3647	0.086	-0.4438	2	1	1	0
Q9DB20	Atp5po	0.579	0.2424	-1.1062	-1.091	0.579	0.2424	-1.1062	-1.091	2	1	1	0
Q9DB77	Uqcrc2	0.0391	0.0479	-0.998	-1.1577	0.0391	0.0479	-0.998	-1.1577	2	1	1	0
Q9DBA6	Tysnd1	-0.5247	-0.3822	-1.1315	-0.3146	-0.5247	-0.3822	-1.1315	-0.3146	2	1	1	0
Q9DBG5	Plin3	-0.1969	0.5459	-0.8292	0.0757	-0.1969	0.5459	-0.8292	0.0757	2	1	1	0
Q9DBL7	Coasy	0.2418	0.1323	-0.5724	-0.7068	0.2418	0.1323	-0.5724	-0.7068	2	1	1	0
Q9DBP5	Cmpk1	0.0763	-0.1655	-1.1861	-1.428	0.0763	-0.1655	-1.1861	-1.428	2	1	1	0
Q9DBS5	Klc4	0.2076	-0.4225	-1.2203	-0.9303	0.2076	-0.4225	-1.2203	-0.9303	2	1	1	0
Q9DCA2	Mrps11	-0.6479	-0.284	-0.8623	0.2638	-0.6479	-0.284	-0.8623	0.2638	2	1	1	0
Q9DCC7	Isoc2b	0.7835	-0.7234	-0.0031	-0.7745	0.7835	-0.7234	-0.0031	-0.7745	2	1	1	0
Q9DCM0	Ethe1	0.1922	-0.339	-0.59	-1.2443	0.1922	-0.339	-0.59	-1.2443	2	1	1	0
Q9DCP2	Slc38a3	0.6317	-0.8667	0.4449	-1.2938	0.6317	-0.8667	0.4449	-1.2938	2	1	1	0
Q9DCS3	Mecr	0.0303	-0.2943	-0.6253	-0.333	0.0303	-0.2943	-0.6253	-0.333	2	1	1	0
Q9DCT5	Sdf2	0.4113	-0.3696	-0.8815	-0.5999	0.4113	-0.3696	-0.8815	-0.5999	2	1	1	0
Q9DCU9	Hoga1	0.2199	-0.2684	-0.3506	-0.7419	0.2199	-0.2684	-0.3506	-0.7419	2	1	1	0
Q9DCV4	Rmdn1	-0.2655	-0.1725	-0.3906	-0.6527	-0.2655	-0.1725	-0.3906	-0.6527	2	1	1	0
Q9DCW4	Etfb	0.2226	-0.1874	-1.0849	-1.1624	0.2226	-0.1874	-1.0849	-1.1624	2	1	1	0
Q9DCX2	Atp5pd	0.1327	-0.6003	-0.9727	-1.3081	0.1327	-0.6003	-0.9727	-1.3081	2	1	1	0
Q9EQ20	Aldh6a1	0.1403	0.1651	-0.5588	-0.8384	0.1403	0.1651	-0.5588	-0.8384	2	1	1	0
Q9ER88	Dap3	0.1382	-0.3211	-1.2571	-1.4849	0.1382	-0.3211	-1.2571	-1.4849	2	1	1	0
Q9ERD7	Tubb3	0.2134	0.8356	-1.1785	-0.876	0.2134	0.8356	-1.1785	-0.876	2	1	1	0
Q9ERG0	Lima1	-0.6047	0.1037	-0.5846	0.4084	-0.6047	0.1037	-0.5846	0.4084	2	1	1	0
Q9ES97	Rtn3	-0.5557	-0.4602	-0.8892	0.7474	-0.5557	-0.4602	-0.8892	0.7474	2	1	1	0
Q9JI75	Nqo2	-1.2335	0.0751	-0.9791	-0.9489	-1.2335	0.0751	-0.9791	-0.9489	2	1	1	0
Q9JIK9	Mrps34	-0.6444	-0.0913	-1.3399	-0.9861	-0.6444	-0.0913	-1.3399	-0.9861	2	1	1	0
Q9JIY5	Htra2	-0.0036	-0.8645	-1.0278	-1.3017	-0.0036	-0.8645	-1.0278	-1.3017	2	1	1	0
Q9JJ00	Plscr1	-0.0676	0.035	-1.4061	-0.3792	-0.0676	0.035	-1.4061	-0.3792	2	1	1	0
Q9JJ28	Flii	1.105	-0.8156	-0.5581	-0.0649	1.105	-0.8156	-0.5581	-0.0649	2	1	1	0
Q9JKL4	Ndufaf3	-0.0184	-0.2633	-0.4344	-1.0816	-0.0184	-0.2633	-0.4344	-1.0816	2	1	1	0
Q9JL15	Lgals8	-0.0405	0.1526	-0.7572	-1.0244	-0.0405	0.1526	-0.7572	-1.0244	2	1	1	0
Q9JLJ2	Aldh9a1	0.3219	-0.6581	-0.0431	-0.8846	0.3219	-0.6581	-0.0431	-0.8846	2	1	1	0
Q9JLJ5	Elovl1	0.63	-0.8342	-0.0442	0.5019	0.63	-0.8342	-0.0442	0.5019	2	1	1	0
Q9JLQ0	Cd2ap	0.3988	-0.2149	-1.4759	-1.1243	0.3988	-0.2149	-1.4759	-1.1243	2	1	1	0
Q9JLT4	Txnrd2	0.1586	-0.0513	-1.1985	-0.765	0.1586	-0.0513	-1.1985	-0.765	2	1	1	0
Q9JLZ3	Auh	0.3172	-0.2292	-0.6578	-0.958	0.3172	-0.2292	-0.6578	-0.958	2	1	1	0
Q9JMD3	Stard10	1.1821	0.4703	0.0726	-1.4123	1.1821	0.4703	0.0726	-1.4123	2	1	1	0
Q9JMH6	Txnrd1	0.7826	-0.266	-0.2649	-0.6779	0.7826	-0.266	-0.2649	-0.6779	2	1	1	0
Q9QWL7	Krt17	-1.2848	-0.3899	-1.0112	-0.4912	-1.2848	-0.3899	-1.0112	-0.4912	2	1	1	0
Q9QXF8	Gnmt	0.9135	0.4499	-0.7767	-1.441	0.9135	0.4499	-0.7767	-1.441	2	1	1	0
Q9QXG4	Acss2	0.6648	-0.5282	0.5736	-1.4006	0.6648	-0.5282	0.5736	-1.4006	2	1	1	0
Q9QYC0	Add1	0.1307	0.6872	-0.8971	-1.0966	0.1307	0.6872	-0.8971	-1.0966	2	1	1	0
Q9QZ23	Nfu1	-0.2364	-0.6306	-0.6194	-0.7095	-0.2364	-0.6306	-0.6194	-0.7095	2	1	1	0
Q9R062	Gyg1	-0.3048	-0.6797	-1.1688	-0.1805	-0.3048	-0.6797	-1.1688	-0.1805	2	1	1	0
Q9R0A1	Clcn2	0.0385	-1.205	-1.191	-1.2096	0.0385	-1.205	-1.191	-1.2096	2	1	1	0
Q9R112	Sqor	-1.0135	-0.4411	-0.6155	-1.3652	-1.0135	-0.4411	-0.6155	-1.3652	2	1	1	0
Q9R1P3	Psmb2	-0.7255	0.7498	-0.3096	-1.4307	-0.7255	0.7498	-0.3096	-1.4307	2	1	1	0
Q9WTI7	Myo1c	-0.4135	-0.4084	-0.4418	-0.6312	-0.4135	-0.4084	-0.4418	-0.6312	2	1	1	0
Q9WTU6	Mapk9	0.5407	-0.7577	-0.4292	-0.3888	0.5407	-0.7577	-0.4292	-0.3888	2	1	1	0
Q9WU84	Ccs	0.167	-0.2415	-1.4995	-0.4097	0.167	-0.2415	-1.4995	-0.4097	2	1	1	0
Q9WUA2	Farsb	0.8607	0.2209	-1.3219	-1.1316	0.8607	0.2209	-1.3219	-1.1316	2	1	1	0
Q9WUM5	Suclg1	0.1014	-0.5116	-0.8891	-0.5281	0.1014	-0.5116	-0.8891	-0.5281	2	1	1	0
Q9WV68	Decr2	-0.5281	0.2153	-0.7528	-0.3215	-0.5281	0.2153	-0.7528	-0.3215	2	1	1	0
Q9WVA2	Timm8a1	0.0061	-0.1585	-0.8998	0.0163	0.0061	-0.1585	-0.8998	0.0163	2	1	1	0
Q9WVM8	Aadat	-0.1772	-0.4771	-0.5888	-0.2703	-0.1772	-0.4771	-0.5888	-0.2703	2	1	1	0
Q9Z0S1	Bpnt1	0.2243	-0.5012	-0.6447	-0.967	0.2243	-0.5012	-0.6447	-0.967	2	1	1	0
Q9Z0X1	Aifm1	0.0461	0.0066	-0.61	-1.2478	0.0461	0.0066	-0.61	-1.2478	2	1	1	0
Q9Z1Z2	Strap	0.0044	0.0174	-1.0196	-0.03	0.0044	0.0174	-1.0196	-0.03	2	1	1	0
Q9Z2C5	Mtm1	0.5949	-0.118	-0.3195	-0.9294	0.5949	-0.118	-0.3195	-0.9294	2	1	1	0
Q9Z2I8	Suclg2	-0.1664	-0.3708	-0.3545	-0.4704	-0.1664	-0.3708	-0.3545	-0.4704	2	1	1	0
Q9Z2I9	Sucla2	-0.1525	-0.2612	-0.4393	-0.6332	-0.1525	-0.2612	-0.4393	-0.6332	2	1	1	0
Q9Z2K1	Krt16	-0.6585	-0.3367	-0.8539	-0.7805	-0.6585	-0.3367	-0.8539	-0.7805	2	1	1	0
O70370	Ctss	-0.9844	-1.8134	2.0674	1.8042	-0.9844	-1.8134	2.0674	1.8042	3	1	1	0
P01786	NoGeneName	-1.5051	-1.7014	0.4547	0.7027	-1.5051	-1.7014	0.4547	0.7027	3	1	1	0
P23249	Mov10	-1.6477	-1.5773	-0.0494	0.8772	-1.6477	-1.5773	-0.0494	0.8772	3	1	1	0
P26645	Marcks	-1.7348	-2.3445	0.2598	0.8537	-1.7348	-2.3445	0.2598	0.8537	3	1	1	0
P54761	Ephb4	-1.8619	-1.5772	0.1931	-0.554	-1.8619	-1.5772	0.1931	-0.554	3	1	1	0
P59481	Lman2l	-1.54	-2.3956	-0.4677	-0.2275	-1.54	-2.3956	-0.4677	-0.2275	3	1	1	0
P61087	Ube2k	-1.7772	-1.6794	1.1718	0.6468	-1.7772	-1.6794	1.1718	0.6468	3	1	1	0
P97370	Atp1b3	-2.583	-1.633	0.4128	0.0521	-2.583	-1.633	0.4128	0.0521	3	1	1	0
Q3TCJ1	Abraxas2	-0.4531	-1.9474	0.4177	-1.5624	-0.4531	-1.9474	0.4177	-1.5624	3	1	1	0
Q3UW53	Fam129a	-1.8361	-2.8643	0.6639	0.6934	-1.8361	-2.8643	0.6639	0.6934	3	1	1	0
Q4VAE3	Tmem65	-1.9936	-2.925	0.1244	-0.2769	-1.9936	-2.925	0.1244	-0.2769	3	1	1	0
Q60870	Reep5	-1.6131	-2.3122	0.685	0.8716	-1.6131	-2.3122	0.685	0.8716	3	1	1	0
Q8K1N2	Phldb2	-2.0977	-1.8336	1.0682	-0.6293	-2.0977	-1.8336	1.0682	-0.6293	3	1	1	0
Q8VI94	Oasl1	-2.4776	-2.2323	0.4042	0.5663	-2.4776	-2.2323	0.4042	0.5663	3	1	1	0
Q9CQ06	Mrpl24	-1.7229	-0.8778	0.3232	-1.5189	-1.7229	-0.8778	0.3232	-1.5189	3	1	1	0
Q9D081	Alg14	-1.5745	-3.2876	-0.3621	-0.7758	-1.5745	-3.2876	-0.3621	-0.7758	3	1	1	0
Q9EQK5	Mvp	-1.7511	-1.9836	0.0301	0.2826	-1.7511	-1.9836	0.0301	0.2826	3	1	1	0
Q9Z110	Aldh18a1	-1.7228	-1.7144	0.7465	0.4529	-1.7228	-1.7144	0.7465	0.4529	3	1	1	0
A0A0B4J1G0	Fcgr4	-2.0111	-0.9435	0.7937	0.1704	-2.0111	-0.9435	0.7937	0.1704	3	1	1	0
A0JNU3	Aspg	-0.4696	-0.4246	0.7419	-1.5764	-0.4696	-0.4246	0.7419	-1.5764	3	1	1	0
A1L317	Krt24	-1.7778	-0.731	0.3089	0.4503	-1.7778	-0.731	0.3089	0.4503	3	1	1	0
A2APY7	Ndufaf5	-1.683	-0.9987	0.389	0.8231	-1.683	-0.9987	0.389	0.8231	3	1	1	0
A2AVZ9	Slc43a3	-1.9859	0.1171	0.7163	0.9056	-1.9859	0.1171	0.7163	0.9056	3	1	1	0
D3Z6P0	Pdia2	0.1536	-1.5226	-0.7938	-0.0645	0.1536	-1.5226	-0.7938	-0.0645	3	1	1	0
G5E829	Atp2b1	-1.5292	-0.7692	-0.2368	0.0097	-1.5292	-0.7692	-0.2368	0.0097	3	1	1	0
O35074	Ptgis	0.7853	-1.7357	1.1316	-0.5049	0.7853	-1.7357	1.1316	-0.5049	3	1	1	0
O35250	Exoc7	0.4601	-1.7229	-0.676	-0.2941	0.4601	-1.7229	-0.676	-0.2941	3	1	1	0
O35309	Nmi	-0.7236	-2.6045	-0.0342	-1.06	-0.7236	-2.6045	-0.0342	-1.06	3	1	1	0
O35316	Slc6a6	-0.647	-1.7871	0.4563	-0.3607	-0.647	-1.7871	0.4563	-0.3607	3	1	1	0
O35326	Srsf5	-0.3682	-1.628	0.0088	-0.1935	-0.3682	-1.628	0.0088	-0.1935	3	1	1	0
O35744	Chil3	-4.1798	-0.7753	-0.165	0.7875	-4.1798	-0.7753	-0.165	0.7875	3	1	1	0
O35855	Bcat2	-0.9558	-2.1132	-0.2328	0.445	-0.9558	-2.1132	-0.2328	0.445	3	1	1	0
O54950	Prkag1	-0.8275	-1.7231	0.014	-0.1003	-0.8275	-1.7231	0.014	-0.1003	3	1	1	0
O55222	Ilk	-0.1102	-2.0714	-1.2236	-0.5938	-0.1102	-2.0714	-1.2236	-0.5938	3	1	1	0
O70161	Pip5k1c	-1.5478	-0.9935	0.1816	0.5011	-1.5478	-0.9935	0.1816	0.5011	3	1	1	0
O70281	Tpst1	-1.5941	-0.6529	0.7864	0.8144	-1.5941	-0.6529	0.7864	0.8144	3	1	1	0
O89016	Abcd4	-1.592	-1.3113	0.8337	0.7103	-1.592	-1.3113	0.8337	0.7103	3	1	1	0
P01887	B2m	0.3732	-1.9365	-0.9015	-0.2472	0.3732	-1.9365	-0.9015	-0.2472	3	1	1	0
P03911	Mtnd4	-1.8307	-0.1743	-0.2673	0.4917	-1.8307	-0.1743	-0.2673	0.4917	3	1	1	0
P04230	H2-Eb1	-0.6151	-2.3488	1.4496	0.3114	-0.6151	-2.3488	1.4496	0.3114	3	1	1	0
P04441	Cd74	-1.2958	-1.6108	1.0928	0.8062	-1.2958	-1.6108	1.0928	0.8062	3	1	1	0
P04627	Araf	-0.3057	-2.3908	-0.1198	-0.1057	-0.3057	-2.3908	-0.1198	-0.1057	3	1	1	0
P09055	Itgb1	-1.6581	-1.4381	-0.046	-1.2273	-1.6581	-1.4381	-0.046	-1.2273	3	1	1	0
P09242	Alpl	-2.2948	-0.0905	1.0106	-0.578	-2.2948	-0.0905	1.0106	-0.578	3	1	1	0
P09803	Cdh1	-1.6366	0.0136	0.578	0.9447	-1.6366	0.0136	0.578	0.9447	3	1	1	0
P17710	Hk1	-1.3922	-1.5432	-0.4108	0.2092	-1.3922	-1.5432	-0.4108	0.2092	3	1	1	0
P20040	NoGeneName	-0.7191	-2.5249	1.4433	0.3748	-0.7191	-2.5249	1.4433	0.3748	3	1	1	0
P20108	Prdx3	-0.4703	-1.5615	1.0032	0.7979	-0.4703	-1.5615	1.0032	0.7979	3	1	1	0
P24452	Capg	-1.2734	-1.9013	-0.3972	0.5794	-1.2734	-1.9013	-0.3972	0.5794	3	1	1	0
P25446	Fas	-0.3026	-1.5943	0.6621	-0.3714	-0.3026	-1.5943	0.6621	-0.3714	3	1	1	0
P31651	Slc6a12	-0.124	-1.6867	0.3904	-1.3924	-0.124	-1.6867	0.3904	-1.3924	3	1	1	0
P35737	H2-DMb1	-2.2463	0.2574	0.9827	0.5087	-2.2463	0.2574	0.9827	0.5087	3	1	1	0
P50396	Gdi1	-0.2575	-0.6011	0.9798	-1.5065	-0.2575	-0.6011	0.9798	-1.5065	3	1	1	0
P51437	Camp	-2.4206	-0.5737	-0.5438	0.9582	-2.4206	-0.5737	-0.5438	0.9582	3	1	1	0
P52332	Jak1	-1.2512	-1.601	0.5774	-0.1011	-1.2512	-1.601	0.5774	-0.1011	3	1	1	0
P61027	Rab10	-1.9112	0.0958	-0.5362	0.771	-1.9112	0.0958	-0.5362	0.771	3	1	1	0
P62071	Rras2	-1.4668	-1.8825	-0.1399	-0.1696	-1.4668	-1.8825	-0.1399	-0.1696	3	1	1	0
P62196	Psmc5	-0.3949	0.766	1.1661	-2.2123	-0.3949	0.766	1.1661	-2.2123	3	1	1	0
P62874	Gnb1	-1.0531	-1.6912	0.1833	-1.4084	-1.0531	-1.6912	0.1833	-1.4084	3	1	1	0
P62880	Gnb2	-0.9084	-2.1058	0.7547	-0.8707	-0.9084	-2.1058	0.7547	-0.8707	3	1	1	0
P63328	Ppp3ca	-1.5519	-0.3199	0.6566	0.3528	-1.5519	-0.3199	0.6566	0.3528	3	1	1	0
P68037	Ube2l3	-0.4504	-2.9678	-0.2611	0.1915	-0.4504	-2.9678	-0.2611	0.1915	3	1	1	0
P83093	Stim2	-2.2312	0.0682	0.3609	0.6313	-2.2312	0.0682	0.3609	0.6313	3	1	1	0
P97348	Rhod	-0.0038	-1.584	1.1212	-0.2011	-0.0038	-1.584	1.1212	-0.2011	3	1	1	0
P97371	Psme1	-0.8041	-1.612	0.1521	-1.3967	-0.8041	-1.612	0.1521	-1.3967	3	1	1	0
P97372	Psme2	-1.1326	-2.301	-0.0092	-0.6284	-1.1326	-2.301	-0.0092	-0.6284	3	1	1	0
P97429	Anxa4	-1.3264	-1.5307	0.4525	-0.7275	-1.3264	-1.5307	0.4525	-0.7275	3	1	1	0
Q08857	Cd36	-1.8569	-1.3764	0.0118	-0.447	-1.8569	-1.3764	0.0118	-0.447	3	1	1	0
Q3TCH7	Cul4a	-0.4569	-1.6574	0.3183	0.2225	-0.4569	-1.6574	0.3183	0.2225	3	1	1	0
Q3TPX4	Exoc5	-2.2289	0.747	1.1648	-0.0915	-2.2289	0.747	1.1648	-0.0915	3	1	1	0
Q3TRM8	Hk3	0.1604	-2.3719	1.4413	0.9319	0.1604	-2.3719	1.4413	0.9319	3	1	1	0
Q3ULF4	Spg7	0.6079	-1.9841	-0.549	-0.4465	0.6079	-1.9841	-0.549	-0.4465	3	1	1	0
Q3UPF5	Zc3hav1	-0.287	-1.5494	0.0969	0.5479	-0.287	-1.5494	0.0969	0.5479	3	1	1	0
Q3UVG3	Fam91a1	-1.5661	-0.0285	0.2833	-0.187	-1.5661	-0.0285	0.2833	-0.187	3	1	1	0
Q3V384	Afg1l	-0.9084	-2.7806	0.0938	0.209	-0.9084	-2.7806	0.0938	0.209	3	1	1	0
Q5F2F2	Abhd15	-1.5499	-1.1135	1.395	0.2476	-1.5499	-1.1135	1.395	0.2476	3	1	1	0
Q5KU39	Vps41	-1.1419	-1.535	0.9104	-0.0538	-1.1419	-1.535	0.9104	-0.0538	3	1	1	0
Q5SW19	Cluh	-0.1803	-1.7474	-0.394	-0.2372	-0.1803	-1.7474	-0.394	-0.2372	3	1	1	0
Q60710	Samhd1	-0.6877	-1.6725	1.0899	0.6999	-0.6877	-1.6725	1.0899	0.6999	3	1	1	0
Q60715	P4ha1	-1.9716	-1.0654	0.673	-0.3126	-1.9716	-1.0654	0.673	-0.3126	3	1	1	0
Q60754	Marco	-0.6173	-1.9999	0.1538	0.9453	-0.6173	-1.9999	0.1538	0.9453	3	1	1	0
Q60854	Serpinb6	-0.9447	-2.3771	1.0618	0.2501	-0.9447	-2.3771	1.0618	0.2501	3	1	1	0
Q60928	Ggt1	0.0137	-2.5365	-0.4835	-0.8562	0.0137	-2.5365	-0.4835	-0.8562	3	1	1	0
Q60931	Vdac3	-1.7145	-1.298	1.1182	0.6457	-1.7145	-1.298	1.1182	0.6457	3	1	1	0
Q61035	Hars	-0.9456	-1.7028	1.1999	-0.3609	-0.9456	-1.7028	1.1999	-0.3609	3	1	1	0
Q62192	Cd180	-0.866	-2.3151	0.7336	0.9684	-0.866	-2.3151	0.7336	0.9684	3	1	1	0
Q62470	Itga3	0.69	-2.0194	-0.3289	-0.1597	0.69	-2.0194	-0.3289	-0.1597	3	1	1	0
Q63739	Ptp4a1	-0.0282	-2.5719	0.7037	-0.3522	-0.0282	-2.5719	0.7037	-0.3522	3	1	1	0
Q69ZF3	Gba2	-1.7443	-0.5019	1.425	-0.0978	-1.7443	-0.5019	1.425	-0.0978	3	1	1	0
Q8BH04	Pck2	-0.4581	-2.2418	0.6261	-0.5517	-0.4581	-2.2418	0.6261	-0.5517	3	1	1	0
Q8BIG7	Comtd1	-1.6967	-1.4148	0.5434	0.6098	-1.6967	-1.4148	0.5434	0.6098	3	1	1	0
Q8BTM8	Flna	-0.2761	-2.9847	-0.4857	0.0498	-0.2761	-2.9847	-0.4857	0.0498	3	1	1	0
Q8BTX9	Hsdl1	-2.1237	-0.7777	0.1596	0.7119	-2.1237	-0.7777	0.1596	0.7119	3	1	1	0
Q8C0I1	Agps	-1.6881	-0.885	0.149	0.6868	-1.6881	-0.885	0.149	0.6868	3	1	1	0
Q8C1B7	Septin11	1.042	-2.3845	0.7235	-0.7163	1.042	-2.3845	0.7235	-0.7163	3	1	1	0
Q8C2E7	Washc5	-2.9016	0.2914	-0.5505	0.723	-2.9016	0.2914	-0.5505	0.723	3	1	1	0
Q8C7V8	Ccdc134	-1.7753	-0.7411	0.4177	-0.3709	-1.7753	-0.7411	0.4177	-0.3709	3	1	1	0
Q8K0L3	Acsm2	-0.9576	-1.9541	-1.0229	0.356	-0.9576	-1.9541	-1.0229	0.356	3	1	1	0
Q8K1B8	Fermt3	-1.9321	-1.3082	-0.2314	0.3166	-1.9321	-1.3082	-0.2314	0.3166	3	1	1	0
Q8VD00	Tmem97	-0.3942	-2.9414	0.6421	0.1223	-0.3942	-2.9414	0.6421	0.1223	3	1	1	0
Q8VEH8	Erlec1	0.0436	-2.3913	-0.892	-0.434	0.0436	-2.3913	-0.892	-0.434	3	1	1	0
Q8VEM8	Slc25a3	-1.7325	-0.4112	0.384	0.3888	-1.7325	-0.4112	0.384	0.3888	3	1	1	0
Q8WUR0	NoGeneName	-1.8005	-0.5019	0.3211	-0.7469	-1.8005	-0.5019	0.3211	-0.7469	3	1	1	0
Q91W53	Golga7	-0.1985	-1.821	-0.9404	-0.1472	-0.1985	-1.821	-0.9404	-0.1472	3	1	1	0
Q91WN2	Tmem150a	-0.2973	-2.7516	0.5629	0.2263	-0.2973	-2.7516	0.5629	0.2263	3	1	1	0
Q91WS0	Cisd1	-0.6961	0.9393	0.9531	-1.6353	-0.6961	0.9393	0.9531	-1.6353	3	1	1	0
Q920E5	Fdps	0.2122	-1.7232	0.7552	-0.9147	0.2122	-1.7232	0.7552	-0.9147	3	1	1	0
Q99KK2	Cmas	-0.8113	-1.5686	1.0252	-0.8787	-0.8113	-1.5686	1.0252	-0.8787	3	1	1	0
Q99M51	Nck1	-1.7489	-1.2148	-0.2161	-0.9527	-1.7489	-1.2148	-0.2161	-0.9527	3	1	1	0
Q9CQI6	Cotl1	-2.4907	-1.2031	1.3305	0.9951	-2.4907	-1.2031	1.3305	0.9951	3	1	1	0
Q9CWE0	Mtfr1l	0.2477	-1.6552	-0.2717	0.6377	0.2477	-1.6552	-0.2717	0.6377	3	1	1	0
Q9CYS6	NoGeneName	-1.7712	-0.8034	0.1004	-1.0334	-1.7712	-0.8034	0.1004	-1.0334	3	1	1	0
Q9D1A2	Cndp2	-0.4949	-1.5469	0.8119	-0.5424	-0.4949	-1.5469	0.8119	-0.5424	3	1	1	0
Q9D1N9	Mrpl21	-0.2433	-2.2845	-0.0937	-0.3659	-0.2433	-2.2845	-0.0937	-0.3659	3	1	1	0
Q9D6K8	Fundc2	-1.9939	-1.3662	-0.1586	-1.3307	-1.9939	-1.3662	-0.1586	-1.3307	3	1	1	0
Q9D8C4	Ifi35	-0.3542	-2.4633	-0.0677	0.0033	-0.3542	-2.4633	-0.0677	0.0033	3	1	1	0
Q9D8W7	Ociad2	-2.7017	-0.3435	0.7885	-0.1133	-2.7017	-0.3435	0.7885	-0.1133	3	1	1	0
Q9DAS9	Gng12	-0.5104	0.7073	0.8412	-1.6454	-0.5104	0.7073	0.8412	-1.6454	3	1	1	0
Q9DAU1	Cnpy3	0.2384	-1.686	0.7906	0.2664	0.2384	-1.686	0.7906	0.2664	3	1	1	0
Q9DC71	Mrps15	-1.7262	0.1531	0.7474	-0.2121	-1.7262	0.1531	0.7474	-0.2121	3	1	1	0
Q9EQP2	Ehd4	-0.2047	-1.8837	-0.208	0.4707	-0.2047	-1.8837	-0.208	0.4707	3	1	1	0
Q9JIF7	Copb1	0.6502	-2.4642	0.8939	0.8485	0.6502	-2.4642	0.8939	0.8485	3	1	1	0
Q9JKK1	Stx6	-1.8028	-1.2595	0.8565	0.3713	-1.8028	-1.2595	0.8565	0.3713	3	1	1	0
Q9NYQ2	Hao2	-0.9721	-1.9544	-0.9675	0.2886	-0.9721	-1.9544	-0.9675	0.2886	3	1	1	0
Q9QWK4	Cd5l	-1.7924	-1.3016	0.2691	-0.5599	-1.7924	-1.3016	0.2691	-0.5599	3	1	1	0
Q9QYI4	Dnajb12	0.5992	-2.2375	0.2095	-0.4171	0.5992	-2.2375	0.2095	-0.4171	3	1	1	0
Q9QZ85	Iigp1	-1.6729	-0.9637	0.9676	-0.3799	-1.6729	-0.9637	0.9676	-0.3799	3	1	1	0
Q9WVA4	Tagln2	-0.8213	-2.0591	0.0802	-0.8485	-0.8213	-2.0591	0.0802	-0.8485	3	1	1	0
Q9WVL3	Slc12a7	-2.0806	-0.8839	0.0384	-0.9609	-2.0806	-0.8839	0.0384	-0.9609	3	1	1	0
Q9Z2J0	Slc23a1	-0.234	-1.8958	-0.1287	-0.027	-0.234	-1.8958	-0.1287	-0.027	3	1	1	0
A2AS89	Agmat	0.0679	-0.7389	0.9915	0.2553	0.0679	-0.7389	0.9915	0.2553	3	1	1	0
A2ASZ8	Slc25a25	-0.8905	-0.4044	-0.1195	0.704	-0.8905	-0.4044	-0.1195	0.704	3	1	1	0
A2ATU0	Dhtkd1	-0.3839	-0.4992	-0.1226	-0.3982	-0.3839	-0.4992	-0.1226	-0.3982	3	1	1	0
A6H611	Mipep	-0.301	-0.2649	0.9578	-0.0972	-0.301	-0.2649	0.9578	-0.0972	3	1	1	0
B2RQC6	Cad	-0.6819	-0.7294	1.4087	0.6631	-0.6819	-0.7294	1.4087	0.6631	3	1	1	0
B2RX12	Abcc3	-0.1941	0.4947	0.2546	0.0407	-0.1941	0.4947	0.2546	0.0407	3	1	1	0
B2RXC1	Trappc11	-0.8805	-1.1233	0.6972	-0.0611	-0.8805	-1.1233	0.6972	-0.0611	3	1	1	0
D3Z7P3	Gls	-0.5639	-1.165	0.5747	0.3317	-0.5639	-1.165	0.5747	0.3317	3	1	1	0
E9Q3L2	Pi4ka	-1.2597	-0.3799	1.0749	0.6247	-1.2597	-0.3799	1.0749	0.6247	3	1	1	0
E9Q555	Rnf213	-0.4192	-0.4711	0.6551	0.4012	-0.4192	-0.4711	0.6551	0.4012	3	1	1	0
E9Q557	Dsp	-1.4555	-0.848	-0.334	-0.6276	-1.4555	-0.848	-0.334	-0.6276	3	1	1	0
E9QAM5	Helz2	-1.0939	-0.8949	1.0518	-0.1351	-1.0939	-0.8949	1.0518	-0.1351	3	1	1	0
O08529	Capn2	-0.9397	-1.0236	0.5417	-1.034	-0.9397	-1.0236	0.5417	-1.034	3	1	1	0
O08638	Myh11	-0.077	-1.2719	0.3185	-0.0364	-0.077	-1.2719	0.3185	-0.0364	3	1	1	0
O08663	Metap2	-0.034	-0.645	-0.2485	0.1769	-0.034	-0.645	-0.2485	0.1769	3	1	1	0
O08749	Dld	-0.1452	-0.8401	-0.1883	-0.1355	-0.1452	-0.8401	-0.1883	-0.1355	3	1	1	0
O08788	Dctn1	-0.1322	-0.7408	0.0441	-0.5238	-0.1322	-0.7408	0.0441	-0.5238	3	1	1	0
O08917	Flot1	-0.7057	-1.1811	-0.4958	-0.2514	-0.7057	-1.1811	-0.4958	-0.2514	3	1	1	0
O09173	Hgd	0.2871	-0.5429	0.6386	-0.1222	0.2871	-0.5429	0.6386	-0.1222	3	1	1	0
O09174	Amacr	-0.7641	-0.3271	-0.2122	-0.7411	-0.7641	-0.3271	-0.2122	-0.7411	3	1	1	0
O35071	Kif1c	0.0089	0.0433	0.2214	-1.1268	0.0089	0.0433	0.2214	-1.1268	3	1	1	0
O35129	Phb2	-0.9232	-0.0966	0.5646	0.0715	-0.9232	-0.0966	0.5646	0.0715	3	1	1	0
O35345	Kpna6	-0.0493	-0.5559	0.3749	-1.328	-0.0493	-0.5559	0.3749	-1.328	3	1	1	0
O35658	C1qbp	-0.5521	-0.7563	1.1379	0.4614	-0.5521	-0.7563	1.1379	0.4614	3	1	1	0
O35857	Timm44	-0.8185	-0.3401	0.592	0.2173	-0.8185	-0.3401	0.592	0.2173	3	1	1	0
O35943	Fxn	-0.2474	-0.4995	-0.0806	-0.2793	-0.2474	-0.4995	-0.0806	-0.2793	3	1	1	0
O54692	Zw10	-0.0834	-0.6382	0.6683	-0.7349	-0.0834	-0.6382	0.6683	-0.7349	3	1	1	0
O54734	Ddost	-0.1598	0.2823	0.2809	0.379	-0.1598	0.2823	0.2809	0.379	3	1	1	0
O54890	Itgb3	-1.2964	-1.2525	0.1499	-0.579	-1.2964	-1.2525	0.1499	-0.579	3	1	1	0
O55026	Entpd2	-1.1491	-0.1984	-0.5163	0.5201	-1.1491	-0.1984	-0.5163	0.5201	3	1	1	0
O55029	Copb2	-0.7537	-0.8325	1.1449	0.1487	-0.7537	-0.8325	1.1449	0.1487	3	1	1	0
O55060	Tpmt	-0.5775	-1.0763	0.9796	-0.3582	-0.5775	-1.0763	0.9796	-0.3582	3	1	1	0
O55125	Nipsnap1	-0.0562	-0.5136	0.0339	-0.7397	-0.0562	-0.5136	0.0339	-0.7397	3	1	1	0
O55126	Nipsnap2	-0.7879	-0.9917	-0.2749	-0.2548	-0.7879	-0.9917	-0.2749	-0.2548	3	1	1	0
O70133	Dhx9	-0.1574	-0.7161	0.5603	-0.1712	-0.1574	-0.7161	0.5603	-0.1712	3	1	1	0
O70252	Hmox2	-1.1782	0.9335	0.8841	-0.8305	-1.1782	0.9335	0.8841	-0.8305	3	1	1	0
O70309	Itgb5	-1.3153	0.2187	-0.3848	0.1544	-1.3153	0.2187	-0.3848	0.1544	3	1	1	0
O70310	Nmt1	-0.6573	0.0684	0.2754	-0.2269	-0.6573	0.0684	0.2754	-0.2269	3	1	1	0
O70325	Gpx4	-0.4025	-0.4529	-0.1893	-0.423	-0.4025	-0.4529	-0.1893	-0.423	3	1	1	0
O70577	Slc22a2	-0.2438	-1.4797	-0.2969	0.1801	-0.2438	-1.4797	-0.2969	0.1801	3	1	1	0
O88338	Cdh16	-1.2355	-0.8422	-0.6285	0.0919	-1.2355	-0.8422	-0.6285	0.0919	3	1	1	0
O88520	Shoc2	-0.1837	-0.8023	0.6553	0.3965	-0.1837	-0.8023	0.6553	0.3965	3	1	1	0
O88544	Cops4	-0.5978	-0.5138	0.0145	-0.1661	-0.5978	-0.5138	0.0145	-0.1661	3	1	1	0
O88697	Stk16	-1.3461	-0.8182	1.2635	0.271	-1.3461	-0.8182	1.2635	0.271	3	1	1	0
O88856	Tpst2	-0.0705	-1.4184	-0.6111	0.0165	-0.0705	-1.4184	-0.6111	0.0165	3	1	1	0
O88962	Cyp8b1	-0.2018	-1.0084	-0.364	0.6175	-0.2018	-1.0084	-0.364	0.6175	3	1	1	0
O88967	Yme1l1	-0.1865	-0.4954	0.4021	-0.5724	-0.1865	-0.4954	0.4021	-0.5724	3	1	1	0
O89020	Afm	-0.6184	-0.3687	-0.2761	-0.3039	-0.6184	-0.3687	-0.2761	-0.3039	3	1	1	0
O89053	Coro1a	-0.6124	-1.0198	1.3497	0.7313	-0.6124	-1.0198	1.3497	0.7313	3	1	1	0
P00397	Mtco1	-1.3643	0.1759	0.2452	0.773	-1.3643	0.1759	0.2452	0.773	3	1	1	0
P00405	Mtco2	-1.0451	-0.4986	0.8027	0.6189	-1.0451	-0.4986	0.8027	0.6189	3	1	1	0
P00493	Hprt1	-0.3671	0.284	1.0112	0.141	-0.3671	0.284	1.0112	0.141	3	1	1	0
P01837	Igkc	-0.205	-0.3707	-0.0593	-0.4699	-0.205	-0.3707	-0.0593	-0.4699	3	1	1	0
P01872	Ighm	-0.9348	-0.926	-0.1039	-0.7118	-0.9348	-0.926	-0.1039	-0.7118	3	1	1	0
P01897	H2-L	-0.7139	-1.2601	1.2051	0.4375	-0.7139	-1.2601	1.2051	0.4375	3	1	1	0
P01921	H2-Ab1	-0.0707	-0.6388	0.614	0.3169	-0.0707	-0.6388	0.614	0.3169	3	1	1	0
P02463	Col4a1	-0.1199	-0.4677	0.0851	-0.3449	-0.1199	-0.4677	0.0851	-0.3449	3	1	1	0
P02535	Krt10	-0.2923	-0.2728	0.4538	-0.3646	-0.2923	-0.2728	0.4538	-0.3646	3	1	1	0
P04104	Krt1	-0.4641	-0.4096	0.6652	-0.3754	-0.4641	-0.4096	0.6652	-0.3754	3	1	1	0
P04117	Fabp4	-0.7548	-0.2827	0.2813	-1.0128	-0.7548	-0.2827	0.2813	-1.0128	3	1	1	0
P04187	Gzmb	-0.3226	-1.0526	1.2478	0.6099	-0.3226	-1.0526	1.2478	0.6099	3	1	1	0
P05784	Krt18	-1.2514	-0.6774	1.1147	0.5454	-1.2514	-0.6774	1.1147	0.5454	3	1	1	0
P05977	Myl1	-0.757	-1.1187	0.3275	-0.3201	-0.757	-1.1187	0.3275	-0.3201	3	1	1	0
P06344	NoGeneName	-0.9628	-0.6467	1.1062	0.4751	-0.9628	-0.6467	1.1062	0.4751	3	1	1	0
P06802	Enpp1	-0.27	-0.6725	-0.4827	-1.1467	-0.27	-0.6725	-0.4827	-1.1467	3	1	1	0
P07356	Anxa2	-1.4289	-0.8912	0.6295	-0.266	-1.4289	-0.8912	0.6295	-0.266	3	1	1	0
P08122	Col4a2	-1.0634	-0.6009	0.2565	-0.4461	-1.0634	-0.6009	0.2565	-0.4461	3	1	1	0
P08228	Sod1	-0.2158	-0.5146	1.2507	0.344	-0.2158	-0.5146	1.2507	0.344	3	1	1	0
P08607	C4bpa	-1.1973	-0.6583	1.2027	0.5704	-1.1973	-0.6583	1.2027	0.5704	3	1	1	0
P09405	Ncl	-0.8527	-0.2606	0.1292	-0.2639	-0.8527	-0.2606	0.1292	-0.2639	3	1	1	0
P09925	Surf1	-0.3069	0.1207	0.2408	0.2363	-0.3069	0.1207	0.2408	0.2363	3	1	1	0
P10852	Slc3a2	-1.0126	-0.8968	-0.5713	0.8479	-1.0126	-0.8968	-0.5713	0.8479	3	1	1	0
P10854	Hist1h2bm	-0.5476	-0.8031	-0.1194	-1.0189	-0.5476	-0.8031	-0.1194	-1.0189	3	1	1	0
P11531	Dmd	-0.0138	-0.8506	0.9072	-0.7375	-0.0138	-0.8506	0.9072	-0.7375	3	1	1	0
P11679	Krt8	-1.1974	-0.7298	0.8565	0.4038	-1.1974	-0.7298	0.8565	0.4038	3	1	1	0
P13597	Icam1	-1.3422	-0.9481	1.1893	0.5646	-1.3422	-0.9481	1.1893	0.5646	3	1	1	0
P14106	C1qb	-0.1017	-0.8191	-0.1447	0.0684	-0.1017	-0.8191	-0.1447	0.0684	3	1	1	0
P14429	H2-Q7	-0.768	-1.0733	1.064	0.4975	-0.768	-1.0733	1.064	0.4975	3	1	1	0
P14733	Lmnb1	-1.3569	-1.3163	0.3799	0.0525	-1.3569	-1.3163	0.3799	0.0525	3	1	1	0
P14824	Anxa6	-0.5656	-0.3343	0.7421	0.2018	-0.5656	-0.3343	0.7421	0.2018	3	1	1	0
P16332	Mmut	-0.1944	-0.538	0.0942	-0.1343	-0.1944	-0.538	0.0942	-0.1343	3	1	1	0
P18828	Sdc1	-0.4288	-1.1266	0.2327	-0.0823	-0.4288	-1.1266	0.2327	-0.0823	3	1	1	0
P19783	Cox4i1	-1.3105	-0.7797	0.5808	0.1909	-1.3105	-0.7797	0.5808	0.1909	3	1	1	0
P20491	Fcer1g	-0.7456	-0.1446	-0.4305	-0.0934	-0.7456	-0.1446	-0.4305	-0.0934	3	1	1	0
P20852	Cyp2a5	-0.7195	-0.3718	0.7516	0.7006	-0.7195	-0.3718	0.7516	0.7006	3	1	1	0
P21278	Gna11	-0.9609	-0.6613	1.1389	-1.3806	-0.9609	-0.6613	1.1389	-1.3806	3	1	1	0
P21279	Gnaq	-0.3712	-1.26	1.0452	-0.3728	-0.3712	-1.26	1.0452	-0.3728	3	1	1	0
P21958	Tap1	-0.8416	-0.9926	0.8065	0.6843	-0.8416	-0.9926	0.8065	0.6843	3	1	1	0
P21981	Tgm2	-1.0575	-0.5518	0.2258	-0.0379	-1.0575	-0.5518	0.2258	-0.0379	3	1	1	0
P23492	Pnp	-1.2388	-0.8866	0.2693	-1.2318	-1.2388	-0.8866	0.2693	-1.2318	3	1	1	0
P25911	Lyn	-0.6296	-0.9638	0.7532	0.1996	-0.6296	-0.9638	0.7532	0.1996	3	1	1	0
P26231	Ctnna1	-1.1746	-1.4103	0.3097	-0.0047	-1.1746	-1.4103	0.3097	-0.0047	3	1	1	0
P26516	Psmd7	-0.2299	-0.169	0.1065	-0.2153	-0.2299	-0.169	0.1065	-0.2153	3	1	1	0
P27601	Gna13	-0.5922	-0.88	0.2222	-0.4661	-0.5922	-0.88	0.2222	-0.4661	3	1	1	0
P27786	Cyp17a1	-0.1964	-0.002	-0.0842	-0.2215	-0.1964	-0.002	-0.0842	-0.2215	3	1	1	0
P29758	Oat	-0.0166	-0.7207	0.4764	-0.0911	-0.0166	-0.7207	0.4764	-0.0911	3	1	1	0
P30412	Ppic	0.4611	-1.14	-0.5519	0.7637	0.4611	-1.14	-0.5519	0.7637	3	1	1	0
P30999	Ctnnd1	-0.6754	-1.2648	-0.1031	-0.8344	-0.6754	-1.2648	-0.1031	-0.8344	3	1	1	0
P31809	Ceacam1	-0.4868	-1.3797	0.6148	-0.9439	-0.4868	-1.3797	0.6148	-0.9439	3	1	1	0
P32921	Wars	-1.278	-0.7642	0.0766	-0.4185	-1.278	-0.7642	0.0766	-0.4185	3	1	1	0
P35285	Rab22a	-0.8559	-0.9767	0.1702	0.4267	-0.8559	-0.9767	0.1702	0.4267	3	1	1	0
P35762	Cd81	-0.6682	-1.0744	0.4237	0.4281	-0.6682	-1.0744	0.4237	0.4281	3	1	1	0
P36371	Tap2	-1.226	-1.208	0.6906	0.8867	-1.226	-1.208	0.6906	0.8867	3	1	1	0
P36552	Cpox	-0.3188	-0.2919	0.0792	-0.6539	-0.3188	-0.2919	0.0792	-0.6539	3	1	1	0
P38647	Hspa9	-0.1212	-0.5989	0.1481	-0.56	-0.1212	-0.5989	0.1481	-0.56	3	1	1	0
P39447	Tjp1	0.0403	-0.425	0.1757	-0.4601	0.0403	-0.425	0.1757	-0.4601	3	1	1	0
P42125	Eci1	-0.2128	-0.2625	0.0467	-0.0864	-0.2128	-0.2625	0.0467	-0.0864	3	1	1	0
P46096	Syt1	0.0338	-0.8657	1.4361	-0.73	0.0338	-0.8657	1.4361	-0.73	3	1	1	0
P46638	Rab11b	-1.169	-0.2513	-0.7649	0.3313	-1.169	-0.2513	-0.7649	0.3313	3	1	1	0
P47738	Aldh2	0.1866	-0.191	0.6052	0.0293	0.1866	-0.191	0.6052	0.0293	3	1	1	0
P47740	Aldh3a2	-0.6548	-0.1555	0.6184	0.7268	-0.6548	-0.1555	0.6184	0.7268	3	1	1	0
P47802	Mtx1	-0.833	-0.8252	0.6839	0.3392	-0.833	-0.8252	0.6839	0.3392	3	1	1	0
P48036	Anxa5	-1.1756	-0.8217	1.0245	-1.061	-1.1756	-0.8217	1.0245	-1.061	3	1	1	0
P48410	Abcd1	-0.7288	-0.2721	0.7534	0.2248	-0.7288	-0.2721	0.7534	0.2248	3	1	1	0
P48962	Slc25a4	-1.424	-0.9354	0.1801	0.4946	-1.424	-0.9354	0.1801	0.4946	3	1	1	0
P50136	Bckdha	0.3122	-0.3727	0.3344	-0.2478	0.3122	-0.3727	0.3344	-0.2478	3	1	1	0
P50544	Acadvl	-0.6846	-0.3977	0.2552	-0.0451	-0.6846	-0.3977	0.2552	-0.0451	3	1	1	0
P51174	Acadl	-0.2018	-0.8676	0.6769	0.3003	-0.2018	-0.8676	0.6769	0.3003	3	1	1	0
P51881	Slc25a5	-1.0011	-0.9606	0.5347	0.4515	-1.0011	-0.9606	0.5347	0.4515	3	1	1	0
P52430	Pon1	-0.3044	-0.2475	0.2557	0.0812	-0.3044	-0.2475	0.2557	0.0812	3	1	1	0
P52480	Pkm	-0.5554	-1.0206	-0.1769	-1.1517	-0.5554	-1.0206	-0.1769	-1.1517	3	1	1	0
P52795	Efnb1	-0.9235	0.0139	0.8481	-0.7737	-0.9235	0.0139	0.8481	-0.7737	3	1	1	0
P52825	Cpt2	-0.2131	-0.2521	-0.0582	-0.3476	-0.2131	-0.2521	-0.0582	-0.3476	3	1	1	0
P53702	Hccs	-0.9215	-0.3922	0.1883	-0.1096	-0.9215	-0.3922	0.1883	-0.1096	3	1	1	0
P53808	Pctp	-1.0206	-0.2033	0.5979	-0.1866	-1.0206	-0.2033	0.5979	-0.1866	3	1	1	0
P53986	Slc16a1	-0.5715	-0.6057	-0.2541	-0.6389	-0.5715	-0.6057	-0.2541	-0.6389	3	1	1	0
P54797	Tango2	-0.8642	-0.772	-0.0031	0.2071	-0.8642	-0.772	-0.0031	0.2071	3	1	1	0
P55096	Abcd3	-0.4597	0.514	0.1955	-0.2711	-0.4597	0.514	0.1955	-0.2711	3	1	1	0
P56135	Atp5mf	-0.6502	-0.0322	1.1346	0.3235	-0.6502	-0.0322	1.1346	0.3235	3	1	1	0
P56213	Gfer	-0.3092	-1.0671	0.0057	-0.0821	-0.3092	-1.0671	0.0057	-0.0821	3	1	1	0
P56391	Cox6b1	-0.5415	-0.583	-0.437	-0.3713	-0.5415	-0.583	-0.437	-0.3713	3	1	1	0
P56480	Atp5f1b	-0.8031	-0.6179	0.5213	0.4206	-0.8031	-0.6179	0.5213	0.4206	3	1	1	0
P58044	Idi1	-0.2985	-0.5894	0.4664	-0.8666	-0.2985	-0.5894	0.4664	-0.8666	3	1	1	0
P60605	Ube2g2	-0.8453	-0.5126	0.367	0.7767	-0.8453	-0.5126	0.367	0.7767	3	1	1	0
P60766	Cdc42	-1.1823	-0.5902	0.8902	-0.7762	-1.1823	-0.5902	0.8902	-0.7762	3	1	1	0
P60843	Eif4a1	-0.8277	-0.5708	0.8568	-0.6187	-0.8277	-0.5708	0.8568	-0.6187	3	1	1	0
P60904	Dnajc5	-0.1512	-0.0806	0.1742	0.3294	-0.1512	-0.0806	0.1742	0.3294	3	1	1	0
P61922	Abat	-0.1698	-0.4683	0.5147	-0.3919	-0.1698	-0.4683	0.5147	-0.3919	3	1	1	0
P61967	Ap1s1	-0.5684	-0.8124	-0.4348	0.4536	-0.5684	-0.8124	-0.4348	0.4536	3	1	1	0
P61979	Hnrnpk	-1.4162	-0.7377	-0.6122	0.9069	-1.4162	-0.7377	-0.6122	0.9069	3	1	1	0
P62242	Rps8	-0.0078	-0.7743	-0.3704	0.1029	-0.0078	-0.7743	-0.3704	0.1029	3	1	1	0
P62245	Rps15a	-0.2074	-0.7874	-0.2574	0.3098	-0.2074	-0.7874	-0.2574	0.3098	3	1	1	0
P62806	Hist4h4	-0.9648	-0.9566	0.7573	0.4197	-0.9648	-0.9566	0.7573	0.4197	3	1	1	0
P62835	Rap1a	0.1589	-0.8195	1.3073	-0.3489	0.1589	-0.8195	1.3073	-0.3489	3	1	1	0
P62908	Rps3	-0.3307	-0.3711	-0.2757	0.1071	-0.3307	-0.3711	-0.2757	0.1071	3	1	1	0
P63101	Ywhaz	-0.208	-0.4098	1.3737	-0.8968	-0.208	-0.4098	1.3737	-0.8968	3	1	1	0
P63260	Actg1	-0.1515	0.2157	0.5326	-0.0316	-0.1515	0.2157	0.5326	-0.0316	3	1	1	0
P63321	Rala	-0.7488	-1.1607	0.9431	0.1678	-0.7488	-1.1607	0.9431	0.1678	3	1	1	0
P67778	Phb	-0.5363	-0.1838	0.7756	0.1082	-0.5363	-0.1838	0.7756	0.1082	3	1	1	0
P68040	Rack1	-0.1622	-0.348	-0.5023	0.6188	-0.1622	-0.348	-0.5023	0.6188	3	1	1	0
P68373	Tuba1c	-1.1535	-0.8872	0.2643	-1.3311	-1.1535	-0.8872	0.2643	-1.3311	3	1	1	0
P68433	Hist1h3i	-1.2537	-1.2017	0.1089	-0.3394	-1.2537	-1.2017	0.1089	-0.3394	3	1	1	0
P68510	Ywhah	-1.2085	-1.3352	1.2487	0.7007	-1.2085	-1.3352	1.2487	0.7007	3	1	1	0
P70194	Clec4f	0.1224	-1.0474	0.0357	0.857	0.1224	-1.0474	0.0357	0.857	3	1	1	0
P84228	Hist2h3c2	-1.166	-1.2978	0.2334	-0.2883	-1.166	-1.2978	0.2334	-0.2883	3	1	1	0
P84244	H3f3b	-1.2667	-1.2146	0.0662	-0.3765	-1.2667	-1.2146	0.0662	-0.3765	3	1	1	0
P97363	Sptlc2	-0.5437	-0.8224	0.2838	0.6012	-0.5437	-0.8224	0.2838	0.6012	3	1	1	0
P97798	Neo1	-1.2779	-1.1051	0.4889	-0.8614	-1.2779	-1.1051	0.4889	-0.8614	3	1	1	0
P98064	Masp1	-1.3912	-0.4331	-0.1788	-0.8115	-1.3912	-0.4331	-0.1788	-0.8115	3	1	1	0
Q00519	Xdh	-1.3985	0.6286	1.0951	-0.349	-1.3985	0.6286	1.0951	-0.349	3	1	1	0
Q00PI9	Hnrnpul2	-1.4453	0.3362	0.3543	-0.8002	-1.4453	0.3362	0.3543	-0.8002	3	1	1	0
Q03145	Epha2	-0.071	-0.5436	1.1361	-0.0403	-0.071	-0.5436	1.1361	-0.0403	3	1	1	0
Q04736	Yes1	-0.6228	-0.7113	0.3502	0.1789	-0.6228	-0.7113	0.3502	0.1789	3	1	1	0
Q05144	Rac2	-0.9844	-1.2849	-0.4696	-0.1217	-0.9844	-1.2849	-0.4696	-0.1217	3	1	1	0
Q05793	Hspg2	-0.2943	-1.1945	0.6272	-0.7886	-0.2943	-1.1945	0.6272	-0.7886	3	1	1	0
Q05816	Fabp5	0.4019	-1.3225	1.2921	-0.2571	0.4019	-1.3225	1.2921	-0.2571	3	1	1	0
Q05920	Pc	-0.3668	-0.1047	0.2766	-0.1272	-0.3668	-0.1047	0.2766	-0.1272	3	1	1	0
Q06185	Atp5me	-0.5492	-0.6589	0.4054	0.4073	-0.5492	-0.6589	0.4054	0.4073	3	1	1	0
Q14C51	Ptcd3	-0.8017	-0.6552	0.3256	0.0151	-0.8017	-0.6552	0.3256	0.0151	3	1	1	0
Q14DH7	Acss3	0.0524	-0.2907	0.1587	-0.1524	0.0524	-0.2907	0.1587	-0.1524	3	1	1	0
Q2EMV9	Parp14	-0.0571	-0.9754	-0.2276	0.556	-0.0571	-0.9754	-0.2276	0.556	3	1	1	0
Q2HXL6	Edem3	0.0906	-0.2803	1.4423	-0.1008	0.0906	-0.2803	1.4423	-0.1008	3	1	1	0
Q3T9X0	Slc2a9	-1.2477	-0.0693	-0.261	-0.7106	-1.2477	-0.0693	-0.261	-0.7106	3	1	1	0
Q3TC33	Ccdc127	-1.187	-0.3229	0.4951	-0.7143	-1.187	-0.3229	0.4951	-0.7143	3	1	1	0
Q3TDN2	Faf2	-0.8664	0.1558	-0.1514	-0.149	-0.8664	0.1558	-0.1514	-0.149	3	1	1	0
Q3TL44	Nlrx1	-0.2575	-0.8687	0.6616	0.2028	-0.2575	-0.8687	0.6616	0.2028	3	1	1	0
Q3TQB2	Foxred1	-0.7686	-1.4128	0.1869	0.8614	-0.7686	-1.4128	0.1869	0.8614	3	1	1	0
Q3TTY5	Krt2	-0.3929	-0.4616	0.2993	-0.1678	-0.3929	-0.4616	0.2993	-0.1678	3	1	1	0
Q3U4I7	Pyroxd2	-0.8439	-0.5157	-0.1672	0.0612	-0.8439	-0.5157	-0.1672	0.0612	3	1	1	0
Q3U5Q7	Cmpk2	-1.0876	-1.0371	0.4279	-0.6506	-1.0876	-1.0371	0.4279	-0.6506	3	1	1	0
Q3U9N9	Slc16a10	-0.8792	-0.0415	-0.0393	-0.8317	-0.8792	-0.0415	-0.0393	-0.8317	3	1	1	0
Q3UBX0	Tmem109	-0.1311	-0.0456	0.1498	0.4198	-0.1311	-0.0456	0.1498	0.4198	3	1	1	0
Q3UDE2	Ttll12	0.1797	-0.4589	0.7685	-0.0289	0.1797	-0.4589	0.7685	-0.0289	3	1	1	0
Q3UEG6	Agxt2	-0.0112	-0.5879	0.0549	-0.2607	-0.0112	-0.5879	0.0549	-0.2607	3	1	1	0
Q3UHD6	Snx27	-0.4881	-0.4079	-0.5434	0.1047	-0.4881	-0.4079	-0.5434	0.1047	3	1	1	0
Q3UQ84	Tars2	-0.5129	-0.8468	0.5042	0.7212	-0.5129	-0.8468	0.5042	0.7212	3	1	1	0
Q3URS9	Ccdc51	-0.8516	-0.1872	0.7601	0.4027	-0.8516	-0.1872	0.7601	0.4027	3	1	1	0
Q3UV17	Krt76	-1.1072	-0.106	0.6418	-0.4905	-1.1072	-0.106	0.6418	-0.4905	3	1	1	0
Q3UVL4	Vps51	-0.3735	-0.3831	-0.0486	-0.719	-0.3735	-0.3831	-0.0486	-0.719	3	1	1	0
Q3V3R1	Mthfd1l	-1.0971	-1.0552	0.2669	0.4081	-1.0971	-1.0552	0.2669	0.4081	3	1	1	0
Q4KML4	Abracl	-0.5119	0.0256	0.4343	-0.5444	-0.5119	0.0256	0.4343	-0.5444	3	1	1	0
Q505D7	Opa3	-0.2279	-0.1611	0.7419	0.3573	-0.2279	-0.1611	0.7419	0.3573	3	1	1	0
Q571F8	Gls2	0.1088	-0.3047	0.2341	0.271	0.1088	-0.3047	0.2341	0.271	3	1	1	0
Q5F285	Tmem256	-0.316	-0.2569	0.4836	0.2838	-0.316	-0.2569	0.4836	0.2838	3	1	1	0
Q5M8N4	Sdr39u1	-0.523	-1.4238	-1.0692	-0.0822	-0.523	-1.4238	-1.0692	-0.0822	3	1	1	0
Q5RKZ7	Mocs1	-0.2629	-0.5789	1.0674	0.3335	-0.2629	-0.5789	1.0674	0.3335	3	1	1	0
Q5SS80	Dhrs13	-1.034	-1.0137	0.4429	-0.6045	-1.034	-1.0137	0.4429	-0.6045	3	1	1	0
Q5SSK3	Tefm	-1.0325	-0.0598	0.8997	0.6593	-1.0325	-0.0598	0.8997	0.6593	3	1	1	0
Q5SUC9	Sco1	-0.795	-0.7838	0.6762	0.2486	-0.795	-0.7838	0.6762	0.2486	3	1	1	0
Q5SWT3	Slc25a35	-0.7545	-0.5374	0.8878	-0.9342	-0.7545	-0.5374	0.8878	-0.9342	3	1	1	0
Q5U458	Dnajc11	-1.1845	-0.5842	0.9861	0.6779	-1.1845	-0.5842	0.9861	0.6779	3	1	1	0
Q60597	Ogdh	-0.8853	-0.9648	-0.0194	-0.1406	-0.8853	-0.9648	-0.0194	-0.1406	3	1	1	0
Q60680	Chuk	-0.4581	0.8411	1.0831	-0.1423	-0.4581	0.8411	1.0831	-0.1423	3	1	1	0
Q60738	Slc30a1	-0.5648	-0.5035	0.3744	-0.4158	-0.5648	-0.5035	0.3744	-0.4158	3	1	1	0
Q60759	Gcdh	-0.101	-0.2074	0.1553	-0.3136	-0.101	-0.2074	0.1553	-0.3136	3	1	1	0
Q60930	Vdac2	-1.487	-1.1302	0.9841	0.8523	-1.487	-1.1302	0.9841	0.8523	3	1	1	0
Q60932	Vdac1	-1.3061	-0.9539	1.1092	0.5671	-1.3061	-0.9539	1.1092	0.5671	3	1	1	0
Q61009	Scarb1	-0.579	-0.4923	0.9808	-1.2021	-0.579	-0.4923	0.9808	-1.2021	3	1	1	0
Q61102	Abcb7	-0.6197	-0.3987	1.2846	-0.0024	-0.6197	-0.3987	1.2846	-0.0024	3	1	1	0
Q61176	Arg1	-0.1103	-0.3193	0.3633	0.0881	-0.1103	-0.3193	0.3633	0.0881	3	1	1	0
Q61235	Sntb2	-0.7241	-1.3569	-0.4928	0.5792	-0.7241	-1.3569	-0.4928	0.5792	3	1	1	0
Q61285	Abcd2	-0.4055	0.3034	0.1936	0.0177	-0.4055	0.3034	0.1936	0.0177	3	1	1	0
Q61301	Ctnna2	-0.3718	-0.3837	0.4702	-0.2395	-0.3718	-0.3837	0.4702	-0.2395	3	1	1	0
Q61539	Esrrb	-0.372	-0.6987	-0.6246	0.5279	-0.372	-0.6987	-0.6246	0.5279	3	1	1	0
Q61586	Gpam	-0.8618	-0.1477	0.6845	0.0631	-0.8618	-0.1477	0.6845	0.0631	3	1	1	0
Q61598	Gdi2	-0.1201	-0.5777	1.4533	-0.0768	-0.1201	-0.5777	1.4533	-0.0768	3	1	1	0
Q61656	Ddx5	-1.017	-0.2524	1.0099	-0.4633	-1.017	-0.2524	1.0099	-0.4633	3	1	1	0
Q61712	Dnajc1	-0.7543	-0.0833	0.1287	-0.4645	-0.7543	-0.0833	0.1287	-0.4645	3	1	1	0
Q61735	Cd47	-0.4552	-0.7654	0.0622	0.4473	-0.4552	-0.7654	0.0622	0.4473	3	1	1	0
Q61772	Epha7	-0.1987	-0.4415	0.4871	0.3458	-0.1987	-0.4415	0.4871	0.3458	3	1	1	0
Q61879	Myh10	-0.0649	-0.7793	0.1587	-0.8673	-0.0649	-0.7793	0.1587	-0.8673	3	1	1	0
[truncated: 1,243 more rows]

## Sheet: sortclusters
Supplemental Table 7.The Qprot results for the comparison between time points. The results from t-SNE (clusterNumber) are showing in here. We are selecting only the proteins that change in exercise.
Protein	Gene names	Zstatistic_leupeptin_ex_0_2	Zstatistic_leupeptine_sed_0_2	Zstatistic_saline_ex_0_2	Zstatistic_saline_sed_0_2	V1	V2	V3	V4	clusterNum	count_t1	count_t2	count
Q9Z2X8	Keap1	5.3514	4.2206	1.6663	1.1291	5.3514	4.2206	1.6663	1.1291	1	1	2	1
Q9R182	Angptl3	4.3497	2.9689	1.7792	0.7363	4.3497	2.9689	1.7792	0.7363	1	1	2	1
P70274	Selenop	4.0973	1.4908	-0.6953	1.0436	4.0973	1.4908	-0.6953	1.0436	1	2	1	1
Q9Z1P8	Angptl4	3.9679	0.8832	0.3734	0.6584	3.9679	0.8832	0.3734	0.6584	1	2	1	1
Q4PZA2	Ece1	3.829	1.2873	0.0051	1.0407	3.829	1.2873	0.0051	1.0407	1	2	1	1
Q8R317	Ubqln1	3.6514	1.3828	-0.7878	-1.9466	3.6514	1.3828	-0.7878	-1.9466	1	2	1	1
Q08879	Fbln1	3.508	1.4702	-0.6668	-1.9039	3.508	1.4702	-0.6668	-1.9039	1	2	1	1
O08573	Lgals9	3.2459	0.8336	-1.8573	-1.7494	3.2459	0.8336	-1.8573	-1.7494	2	2	1	1
Q9CQM5	Txndc17	3.2193	1.0473	-1.7773	-3.1749	3.2193	1.0473	-1.7773	-3.1749	2	2	1	1
Q9Z0R4	Itsn1	3.1295	0.8729	-0.3493	-0.146	3.1295	0.8729	-0.3493	-0.146	1	2	1	1
P07214	Sparc	3.0327	1.1701	0.0858	-1.1836	3.0327	1.1701	0.0858	-1.1836	1	2	1	1
O70400	Pdlim1	2.9831	1.0493	0.1045	-0.5066	2.9831	1.0493	0.1045	-0.5066	1	2	1	1
Q06335	Aplp2	2.9402	1.3803	0.5254	0.2072	2.9402	1.3803	0.5254	0.2072	1	2	1	1
Q9QZB7	Actr10	2.8259	-1.532	-0.1198	-0.1974	2.8259	-1.532	-0.1198	-0.1974	1	2	1	1
Q8BIJ7	Rufy1	2.8121	0.4956	1.431	1.1504	2.8121	0.4956	1.431	1.1504	1	2	1	1
Q9CPW4	Arpc5	2.7404	0.9282	-0.5466	-0.8622	2.7404	0.9282	-0.5466	-0.8622	1	2	1	1
Q61234	Snta1	2.684	-4.028	2.9474	-0.5918	2.684	-4.028	2.9474	-0.5918	4	2	2	2
P70297	Stam	2.6602	0.4492	-0.3707	0.4137	2.6602	0.4492	-0.3707	0.4137	1	2	1	1
Q8BFZ3	Actbl2	2.6516	0.5165	0.8264	-0.9667	2.6516	0.5165	0.8264	-0.9667	1	2	1	1
Q9DBM0	Abcg8	2.6463	1.4469	-0.9365	0.8768	2.6463	1.4469	-0.9365	0.8768	1	2	1	1
P06728	Apoa4	2.6195	1.4377	0.1891	-1.0066	2.6195	1.4377	0.1891	-1.0066	1	2	1	1
Q8BL66	Eea1	2.6163	0.8612	0.447	1.4466	2.6163	0.8612	0.447	1.4466	1	2	1	1
Q8BYH7	Tbc1d17	2.5983	1.4559	1.1065	0.0139	2.5983	1.4559	1.1065	0.0139	1	2	1	1
O89001	Cpd	2.5962	0.5378	-0.8404	0.6697	2.5962	0.5378	-0.8404	0.6697	1	2	1	1
Q8R0W6	Ndfip1	2.5915	0.9989	-0.027	0.9758	2.5915	0.9989	-0.027	0.9758	1	2	1	1
Q9D920	Borcs5	2.5766	0.3808	0.283	1.3479	2.5766	0.3808	0.283	1.3479	1	2	1	1
Q9JLZ8	Sigirr	2.5765	0.9092	-2.8006	-1.5999	2.5765	0.9092	-2.8006	-1.5999	2	2	1	1
Q06890	Clu	2.5613	1.3899	0.1833	-0.0698	2.5613	1.3899	0.1833	-0.0698	1	2	1	1
P97290	Serping1	2.5566	1.2556	0.7467	1.6441	2.5566	1.2556	0.7467	1.6441	1	2	0	1
Q8R1A4	Dock7	2.5489	1.3523	-0.9734	1.3593	2.5489	1.3523	-0.9734	1.3593	1	2	1	1
P16882	Ghr	2.5224	1.412	-8.5899	-0.7837	2.5224	1.412	-8.5899	-0.7837	2	2	1	1
P0DP27	Calm2	2.512	0.9099	-0.1498	-1.6497	2.512	0.9099	-0.1498	-1.6497	1	2	1	1
Q61581	Igfbp7	2.4579	0.5523	0.1598	-0.664	2.4579	0.5523	0.1598	-0.664	1	2	1	1
Q62009	Postn	2.428	-0.6137	-0.3028	0.9123	2.428	-0.6137	-0.3028	0.9123	1	2	1	1
P16330	Cnp	2.4223	0.1916	0.221	-0.3636	2.4223	0.1916	0.221	-0.3636	1	2	1	1
Q91ZX7	Lrp1	2.3875	0.9007	-0.3133	0.0967	2.3875	0.9007	-0.3133	0.0967	1	2	1	1
O35382	Exoc4	2.3844	0.5235	0.368	0.1851	2.3844	0.5235	0.368	0.1851	1	2	1	1
Q8CG16	C1ra	2.3697	1.0838	0.0325	1.0695	2.3697	1.0838	0.0325	1.0695	1	2	1	1
P0DP28	Calm3	2.3657	0.9001	-0.0764	-1.4389	2.3657	0.9001	-0.0764	-1.4389	1	2	1	1
Q9EQJ0	Tpcn1	2.3464	1.0455	-2.6694	-1.4891	2.3464	1.0455	-2.6694	-1.4891	2	2	1	1
Q99KG5	Lsr	2.3385	1.4427	0.6717	-0.2869	2.3385	1.4427	0.6717	-0.2869	1	2	1	1
Q8R4H2	Arhgef12	2.333	-0.6931	2.2414	0.0133	2.333	-0.6931	2.2414	0.0133	4	2	2	2
Q8C767	Ppp1r3b	2.3255	-0.0508	2.1509	0.3211	2.3255	-0.0508	2.1509	0.3211	4	2	2	2
Q99M04	Lias	2.3169	-2.3434	-0.7586	-0.3558	2.3169	-2.3434	-0.7586	-0.3558	1	2	1	1
P62983	Rps27a	2.3162	1.0204	2.3058	1.3437	2.3162	1.0204	2.3058	1.3437	1	2	2	2
P51885	Lum	2.3005	1.4378	-1.3914	-1.669	2.3005	1.4378	-1.3914	-1.669	2	2	1	1
P56371	Rab4a	2.2993	-0.0983	-0.6165	0.9032	2.2993	-0.0983	-0.6165	0.9032	1	2	1	1
Q8K1I3	Spp2	2.2873	0.1603	0.6828	0.5067	2.2873	0.1603	0.6828	0.5067	1	2	1	1
Q99JY8	Plpp3	2.2772	1.2226	-0.0963	-1.2303	2.2772	1.2226	-0.0963	-1.2303	1	2	1	1
P28650	Adssl1	2.1696	-0.452	-0.0585	-0.2542	2.1696	-0.452	-0.0585	-0.2542	1	2	1	1
P83940	Eloc	2.1591	0.2789	-2.4871	-2.4982	2.1591	0.2789	-2.4871	-2.4982	2	2	1	1
O70492	Snx3	2.1392	0.7205	-3.3441	-1.7904	2.1392	0.7205	-3.3441	-1.7904	2	2	1	1
Q99MI1	Erc1	2.1383	0.2781	-2.4772	0.6394	2.1383	0.2781	-2.4772	0.6394	1	2	1	1
Q9R0P5	Dstn	2.1141	1.3054	-0.6963	-0.8185	2.1141	1.3054	-0.6963	-0.8185	1	2	1	1
Q9ERB0	Snap29	2.1015	1.1731	0.9568	-1.5225	2.1015	1.1731	0.9568	-1.5225	1	2	1	1
Q9QXC1	Fetub	2.0955	-0.7517	-1.8775	1.4578	2.0955	-0.7517	-1.8775	1.4578	1	2	1	1
Q61510	Trim25	2.0618	0.3222	0.0494	0.0449	2.0618	0.3222	0.0494	0.0449	1	2	1	1
Q9EST5	Anp32b	2.0599	0.6251	1.0746	-1.4314	2.0599	0.6251	1.0746	-1.4314	1	2	1	1
Q8BFS6	Cpped1	2.059	-0.2385	-0.1935	-0.0953	2.059	-0.2385	-0.1935	-0.0953	1	2	1	1
P07146	Prss2	2.0582	-0.6218	-0.4192	-0.1404	2.0582	-0.6218	-0.4192	-0.1404	1	2	1	1
P39876	Timp3	2.0564	0.9797	0.716	-0.1046	2.0564	0.9797	0.716	-0.1046	1	2	1	1
P04939	Mup3	2.0416	1.3065	0.5705	0.8738	2.0416	1.3065	0.5705	0.8738	1	2	1	1
Q8BWJ3	Phka2	2.0293	0.0859	0.5383	0.3228	2.0293	0.0859	0.5383	0.3228	1	2	1	1
Q8K0D2	Habp2	2.0179	-0.8075	0.0176	-0.0699	2.0179	-0.8075	0.0176	-0.0699	1	2	1	1
Q8VCU1	Ces3b	2.0137	1.3395	0.3813	0.5717	2.0137	1.3395	0.3813	0.5717	1	2	1	1
Q9EQF5	Dpys	1.9979	0.7855	-1.1783	-2.437	1.9979	0.7855	-1.1783	-2.437	2	2	1	1
Q8VBW8	Ttc36	1.9954	0.566	-1.3128	-3.4712	1.9954	0.566	-1.3128	-3.4712	2	2	1	1
P18760	Cfl1	1.9917	0.3142	1.394	0.9502	1.9917	0.3142	1.394	0.9502	1	2	1	1
Q58A65	Spag9	1.9641	1.5415	2.484	0.5881	1.9641	1.5415	2.484	0.5881	1	1	2	1
P32261	Serpinc1	1.9542	0.6846	-0.2598	0.3997	1.9542	0.6846	-0.2598	0.3997	1	2	1	1
Q5I2A0	Serpina3g	1.95	0.4287	-0.1686	0.9459	1.95	0.4287	-0.1686	0.9459	1	2	1	1
Q64373	Bcl2l1	1.9383	-0.4559	1.0451	-0.3899	1.9383	-0.4559	1.0451	-0.3899	1	2	1	1
A2ADY9	Ddi2	1.9328	0.3575	-0.9333	-1.3417	1.9328	0.3575	-0.9333	-1.3417	2	2	1	1
Q8K3K8	Optn	1.9228	1.3171	0.3817	-0.1236	1.9228	1.3171	0.3817	-0.1236	1	2	1	1
Q91WM6	Eva1a	1.9139	0.9645	1.6943	-1.8831	1.9139	0.9645	1.6943	-1.8831	1	2	2	2
P31786	Dbi	1.9087	-0.3559	0.0223	0.9012	1.9087	-0.3559	0.0223	0.9012	1	2	1	1
P97364	Sephs2	1.8955	1.0847	-1.8539	-2.0431	1.8955	1.0847	-1.8539	-2.0431	2	2	1	1
P11276	Fn1	1.8953	0.8287	0.823	0.6677	1.8953	0.8287	0.823	0.6677	1	2	1	1
P11859	Agt	1.8949	1.2744	0.5101	0.5964	1.8949	1.2744	0.5101	0.5964	1	2	1	1
Q8BVW3	Trim14	1.8644	0.9193	1.6154	0.8795	1.8644	0.9193	1.6154	0.8795	1	2	2	2
Q99P27	Pla2g12b	1.8642	1.1536	1.0943	1.0657	1.8642	1.1536	1.0943	1.0657	1	2	1	1
Q61702	Itih1	1.8626	-0.055	-1.0541	0.0266	1.8626	-0.055	-1.0541	0.0266	1	2	1	1
Q9QUH0	Glrx	1.8566	-0.0003	0.4075	-0.0531	1.8566	-0.0003	0.4075	-0.0531	1	2	1	1
Q8VC28	Akr1c13	1.8543	0.8632	-0.4951	-0.8089	1.8543	0.8632	-0.4951	-0.8089	1	2	1	1
Q9D7X3	Dusp3	1.8396	0.5735	0.9736	-2.1858	1.8396	0.5735	0.9736	-2.1858	1	2	1	1
Q9DCV3	Dgat2	1.8379	1.7061	2.1637	0.9325	1.8379	1.7061	2.1637	0.9325	1	1	2	1
P16301	Lcat	1.8324	0.2332	-2.0491	1.0105	1.8324	0.2332	-2.0491	1.0105	1	2	1	1
Q9DAK9	Phpt1	1.8316	0.746	1.0753	-0.7122	1.8316	0.746	1.0753	-0.7122	1	2	1	1
Q91X88	Pomgnt1	1.8302	-0.948	-0.6888	-0.4524	1.8302	-0.948	-0.6888	-0.4524	1	2	1	1
Q61508	Ecm1	1.8291	0.5967	-0.0826	-1.3084	1.8291	0.5967	-0.0826	-1.3084	1	2	1	1
Q99KR8	Fuca2	1.8233	1.3046	0.5995	0.4643	1.8233	1.3046	0.5995	0.4643	1	2	1	1
Q922Y1	Ubxn1	1.8192	0.6847	-1.9287	0.1927	1.8192	0.6847	-1.9287	0.1927	1	2	1	1
Q501J6	Ddx17	1.8173	-1.3244	2.3036	-0.3177	1.8173	-1.3244	2.3036	-0.3177	4	2	2	2
P58158	B3gat3	1.813	0.4348	-0.009	0.5498	1.813	0.4348	-0.009	0.5498	1	2	1	1
Q9Z108	Stau1	1.8042	1.0934	-0.2002	-0.6047	1.8042	1.0934	-0.2002	-0.6047	1	2	1	1
O70571	Pdk4	1.7934	0.4564	3.3543	0.8122	1.7934	0.4564	3.3543	0.8122	4	2	2	2
Q62446	Fkbp3	1.7929	1.4204	-2.2325	-1.4796	1.7929	1.4204	-2.2325	-1.4796	2	2	1	1
Q8K4T3	Stradb	1.7902	-1.6172	0.27	0.0238	1.7902	-1.6172	0.27	0.0238	1	2	1	1
P70697	Urod	1.7865	-0.084	-0.4132	-0.1643	1.7865	-0.084	-0.4132	-0.1643	1	2	1	1
P61961	Ufm1	1.7848	0.7396	-1.0084	0.0861	1.7848	0.7396	-1.0084	0.0861	1	2	1	1
P28654	Dcn	1.7842	1.313	0.3844	-0.4296	1.7842	1.313	0.3844	-0.4296	1	2	1	1
Q9CWK8	Snx2	1.7809	0.7792	-0.6384	-0.991	1.7809	0.7792	-0.6384	-0.991	1	2	1	1
Q00896	Serpina1c	1.7778	1.3566	0.3302	0.8243	1.7778	1.3566	0.3302	0.8243	1	2	1	1
P01029	C4b	1.7739	1.2699	0.8948	1.9042	1.7739	1.2699	0.8948	1.9042	1	2	0	1
Q9QUR6	Prep	1.7726	1.2958	0.3105	-1.2118	1.7726	1.2958	0.3105	-1.2118	1	2	1	1
P61164	Actr1a	1.7612	-0.3778	-0.7649	-0.0377	1.7612	-0.3778	-0.7649	-0.0377	1	2	1	1
Q3UQ44	Iqgap2	1.7577	0.6735	4.0662	1.957	1.7577	0.6735	4.0662	1.957	4	2	1	1
O88746	Tom1	1.7512	0.6478	0.1507	-0.0546	1.7512	0.6478	0.1507	-0.0546	1	2	1	1
P61222	Abce1	1.744	-0.1689	0.1777	0.2544	1.744	-0.1689	0.1777	0.2544	1	2	1	1
Q64374	Rgn	1.7416	0.0136	-0.064	-2.3197	1.7416	0.0136	-0.064	-2.3197	2	2	1	1
Q3UPH1	Prrc1	1.7363	-0.1545	0.6265	-1.0453	1.7363	-0.1545	0.6265	-1.0453	1	2	1	1
P06909	Cfh	1.7258	0.5901	-0.028	0.5496	1.7258	0.5901	-0.028	0.5496	1	2	1	1
Q8VCR7	Abhd14b	1.7254	0.6244	-2.0133	-1.1962	1.7254	0.6244	-2.0133	-1.1962	2	2	1	1
Q9CQU0	Txndc12	1.7217	0.153	0.2485	0.481	1.7217	0.153	0.2485	0.481	1	2	1	1
Q04447	Ckb	1.7133	-1.7357	-1.2081	-1.2684	1.7133	-1.7357	-1.2081	-1.2684	2	2	1	1
Q80VL1	Tdrkh	1.6949	-0.7023	-0.5603	-1.5392	1.6949	-0.7023	-0.5603	-1.5392	2	2	1	1
Q9JMG2	C1galt1c1	1.6926	-1.1171	0.8331	0.8872	1.6926	-1.1171	0.8331	0.8872	4	2	1	1
Q80WG5	Lrrc8a	1.6892	-0.4904	-2.2434	-0.3189	1.6892	-0.4904	-2.2434	-0.3189	2	2	1	1
P55302	Lrpap1	1.6882	1.4601	-0.4268	0.0175	1.6882	1.4601	-0.4268	0.0175	1	2	1	1
O55234	Psmb5	1.6843	1.0783	-2.3236	-2.0713	1.6843	1.0783	-2.3236	-2.0713	2	2	1	1
P05201	Got1	1.6822	-0.101	-0.9445	-2.4942	1.6822	-0.101	-0.9445	-2.4942	2	2	1	1
Q91X52	Dcxr	1.682	0.9109	-0.3812	-2.8357	1.682	0.9109	-0.3812	-2.8357	2	2	1	1
Q62418	Dbnl	1.6816	0.6102	0.3409	1.5498	1.6816	0.6102	0.3409	1.5498	1	2	0	1
Q8BFW7	Lpp	1.6707	-0.2444	-0.583	-0.9639	1.6707	-0.2444	-0.583	-0.9639	2	2	1	1
P45878	Fkbp2	1.6695	0.6581	-0.8719	0.3602	1.6695	0.6581	-0.8719	0.3602	1	2	1	1
Q9D8Y0	Efhd2	1.6685	0.9824	-0.7459	-3	1.6685	0.9824	-0.7459	-3	2	2	1	1
O35737	Hnrnph1	1.6638	-0.2472	-1.1913	-1.0731	1.6638	-0.2472	-1.1913	-1.0731	2	2	1	1
Q9Z2X1	Hnrnpf	1.6524	-1.4197	0.9753	0.2609	1.6524	-1.4197	0.9753	0.2609	4	2	1	1
Q6DYE8	Enpp3	1.6332	-1.2566	0.0915	0.1959	1.6332	-1.2566	0.0915	0.1959	1	2	1	1
Q8R1S9	Slc38a4	1.6265	1.103	0.422	-1.3077	1.6265	1.103	0.422	-1.3077	1	2	1	1
Q6P9Q6	Fkbp15	1.6243	-0.1089	2.7227	1.109	1.6243	-0.1089	2.7227	1.109	4	2	2	2
P29699	Ahsg	1.6234	0.5772	-0.7244	-0.5326	1.6234	0.5772	-0.7244	-0.5326	1	2	1	1
Q9Z1G4	Atp6v0a1	1.6179	1.3591	-1.1851	-0.712	1.6179	1.3591	-1.1851	-0.712	1	2	1	1
P47857	Pfkm	1.6167	-0.3608	-0.0305	0.339	1.6167	-0.3608	-0.0305	0.339	1	2	1	1
Q60866	Pter	1.6121	-0.31	-1.2743	-3.5461	1.6121	-0.31	-1.2743	-3.5461	2	2	1	1
Q60598	Cttn	1.5972	1.4252	1.1365	0.9236	1.5972	1.4252	1.1365	0.9236	1	2	1	1
P17742	Ppia	1.5943	0.6052	-1.0463	-1.1491	1.5943	0.6052	-1.0463	-1.1491	2	2	1	1
Q3TL26	Tfb2m	1.5942	-0.3176	0.4494	0.4707	1.5942	-0.3176	0.4494	0.4707	1	2	1	1
Q61549	Adgre1	1.5867	-0.6508	0.5786	1.7421	1.5867	-0.6508	0.5786	1.7421	4	2	0	1
Q9JKY5	Hip1r	1.5864	-0.5123	-0.8947	0.0771	1.5864	-0.5123	-0.8947	0.0771	1	2	1	1
Q61247	Serpinf2	1.5854	0.4479	0.0701	0.8041	1.5854	0.4479	0.0701	0.8041	1	2	1	1
Q64726	Azgp1	1.5813	0.9059	0.3908	1.3103	1.5813	0.9059	0.3908	1.3103	1	2	1	1
Q9CQ60	Pgls	1.5799	0.1574	-1.0882	-1.8806	1.5799	0.1574	-1.0882	-1.8806	2	2	1	1
O70570	Pigr	1.5766	1.1983	-0.2543	0.1906	1.5766	1.1983	-0.2543	0.1906	1	2	1	1
Q8BLY2	Tarsl2	1.5745	-1.556	-0.9795	-1.8688	1.5745	-1.556	-0.9795	-1.8688	2	2	1	1
Q9DBJ1	Pgam1	1.5669	0.3662	-1.2093	-3.9374	1.5669	0.3662	-1.2093	-3.9374	2	2	1	1
Q8BHA3	Dtd2	1.5594	0.1034	0.2985	-1.1373	1.5594	0.1034	0.2985	-1.1373	1	2	1	1
P12815	Pdcd6	1.5565	0.7374	1.2309	1.1902	1.5565	0.7374	1.2309	1.1902	1	2	1	1
P55292	Dsc2	1.5496	0.9271	0.2831	-1.2306	1.5496	0.9271	0.2831	-1.2306	1	2	1	1
Q3TNA1	Xylb	1.5466	-0.203	0.4279	-0.1414	1.5466	-0.203	0.4279	-0.1414	1	2	1	1
Q64324	Stxbp2	1.539	-0.3394	-0.7985	-1.1308	1.539	-0.3394	-0.7985	-1.1308	2	2	1	1
Q8K0E8	Fgb	1.5266	1.0543	-0.5068	0.0923	1.5266	1.0543	-0.5068	0.0923	1	2	1	1
Q63880	Ces3a	1.5164	1.3207	0.4643	1.5344	1.5164	1.3207	0.4643	1.5344	1	2	0	1
Q9EPC1	Parva	1.3681	-0.8845	1.8306	1.0856	1.3681	-0.8845	1.8306	1.0856	4	1	2	1
Q99JB8	Pacsin3	1.3025	1.2665	1.5866	0.4179	1.3025	1.2665	1.5866	0.4179	1	1	2	1
O08808	Diaph1	1.2925	-1.1629	2.4201	0.4904	1.2925	-1.1629	2.4201	0.4904	4	1	2	1
P42567	Eps15	1.1827	0.5594	2.8492	1.1761	1.1827	0.5594	2.8492	1.1761	4	1	2	1
P23116	Eif3a	1.18	0.1092	1.6853	-1.5548	1.18	0.1092	1.6853	-1.5548	1	1	2	1
Q99K51	Pls3	1.0869	1.0487	2.6573	0.7958	1.0869	1.0487	2.6573	0.7958	4	1	2	1
P04938	Mup11	1.0861	-0.134	2.119	0.654	1.0861	-0.134	2.119	0.654	4	1	2	1
Q61584	Fxr1	1.0132	-0.1679	1.6705	1.3631	1.0132	-0.1679	1.6705	1.3631	4	1	2	1
P53811	Pitpnb	0.9971	-1.4117	2.5257	0.8067	0.9971	-1.4117	2.5257	0.8067	4	1	2	1
P02762	Mup6	0.9789	-0.1367	1.9824	0.6102	0.9789	-0.1367	1.9824	0.6102	4	1	2	1
Q8R0F9	Sec14l4	0.976	0.3486	1.9036	0.1783	0.976	0.3486	1.9036	0.1783	4	1	2	1
Q9EPT5	Slco2a1	0.9509	-0.5261	2.9075	1.4084	0.9509	-0.5261	2.9075	1.4084	4	1	2	1
Q99KK7	Dpp3	0.9015	-0.0774	1.8485	-1.5619	0.9015	-0.0774	1.8485	-1.5619	1	1	2	1
Q8CFI5	Pars2	0.897	-1.0156	1.5416	0.1072	0.897	-1.0156	1.5416	0.1072	4	1	2	1
Q8BKX1	Baiap2	0.8436	0.2263	1.9602	1.3383	0.8436	0.2263	1.9602	1.3383	4	1	2	1
P97792	Cxadr	0.8262	1.6542	2.8633	-0.7505	0.8262	1.6542	2.8633	-0.7505	1	0	2	1
Q61503	Nt5e	0.81	-0.396	1.6466	-0.104	0.81	-0.396	1.6466	-0.104	4	1	2	1
Q64674	Srm	0.8052	0.7931	1.5052	-1.4043	0.8052	0.7931	1.5052	-1.4043	1	1	2	1
Q9D020	Nt5c3a	0.7417	-0.3437	2.5277	1.4707	0.7417	-0.3437	2.5277	1.4707	4	1	2	1
Q91WG0	Ces2c	0.6904	0.4346	1.8912	0.7781	0.6904	0.4346	1.8912	0.7781	4	1	2	1
Q8BL97	Srsf7	0.6838	-0.0896	1.5659	-0.4602	0.6838	-0.0896	1.5659	-0.4602	1	1	2	1
P80318	Cct3	0.6638	0.5136	2.672	0.2036	0.6638	0.5136	2.672	0.2036	4	1	2	1
Q8BYC6	Taok3	0.6425	0.7082	2.8292	1.0275	0.6425	0.7082	2.8292	1.0275	4	1	2	1
Q8R050	Gspt1	0.6341	-0.2721	1.8897	-1.5308	0.6341	-0.2721	1.8897	-1.5308	1	1	2	1
P62259	Ywhae	0.6325	0.5435	2.6268	0.3518	0.6325	0.5435	2.6268	0.3518	4	1	2	1
Q9CYA0	Creld2	0.5465	-0.2586	2.8725	0.8613	0.5465	-0.2586	2.8725	0.8613	4	1	2	1
P84084	Arf5	0.5348	0.8217	3.3224	0.7694	0.5348	0.8217	3.3224	0.7694	4	1	2	1
Q6ZQ89	March6	0.5057	-0.6229	1.9675	1.4251	0.5057	-0.6229	1.9675	1.4251	4	1	2	1
Q8BFY9	Tnpo1	0.4542	0.9847	3.6592	0.235	0.4542	0.9847	3.6592	0.235	4	1	2	1
Q8CIB5	Fermt2	0.4112	0.2767	2.7101	1.449	0.4112	0.2767	2.7101	1.449	4	1	2	1
P41233	Abca1	0.4014	-0.326	2.3772	0.5163	0.4014	-0.326	2.3772	0.5163	4	1	2	1
P17225	Ptbp1	0.4009	-1.1453	2.2273	1.1864	0.4009	-1.1453	2.2273	1.1864	4	1	2	1
P28293	Ctsg	0.3793	-0.3127	2.0173	0.5699	0.3793	-0.3127	2.0173	0.5699	4	1	2	1
Q9D662	Sec23b	0.3776	0.3783	1.5677	0.4168	0.3776	0.3783	1.5677	0.4168	1	1	2	1
E9Q3C1	C2cd2	0.3503	0.0046	1.861	0.1539	0.3503	0.0046	1.861	0.1539	4	1	2	1
Q8BZ98	Dnm3	0.3214	-0.3305	1.7399	0.4814	0.3214	-0.3305	1.7399	0.4814	4	1	2	1
Q8CH40	Nudt6	0.2989	2.1133	2.2414	-0.3488	0.2989	2.1133	2.2414	-0.3488	1	0	2	1
Q9WU19	Hao1	0.2588	0.0817	2.119	-0.4629	0.2588	0.0817	2.119	-0.4629	4	1	2	1
P40237	Cd82	0.2568	0.1722	1.6864	0.0837	0.2568	0.1722	1.6864	0.0837	4	1	2	1
P10639	Txn	0.2171	-1.1901	1.7075	1.435	0.2171	-1.1901	1.7075	1.435	4	1	2	1
P67871	Csnk2b	0.2138	-0.1275	1.5272	0.8929	0.2138	-0.1275	1.5272	0.8929	4	1	2	1
P29391	Ftl1	0.2072	-0.2838	2.0708	0.3276	0.2072	-0.2838	2.0708	0.3276	4	1	2	1
E9Q634	Myo1e	0.2004	-0.7236	2.0035	0.2706	0.2004	-0.7236	2.0035	0.2706	4	1	2	1
P42703	Lifr	0.1895	0.8816	1.7458	-0.6268	0.1895	0.8816	1.7458	-0.6268	1	1	2	1
P43006	Slc1a2	0.188	0.1877	2.4841	-0.0934	0.188	0.1877	2.4841	-0.0934	4	1	2	1
P49615	Cdk5	0.1865	0.9666	1.7093	-0.2895	0.1865	0.9666	1.7093	-0.2895	1	1	2	1
Q9WUH7	Sema4g	0.1703	-0.4743	1.7999	0.3143	0.1703	-0.4743	1.7999	0.3143	4	1	2	1
Q99MB1	Tlr3	0.1699	1.0707	2.7451	0.7177	0.1699	1.0707	2.7451	0.7177	4	1	2	1
Q8VC30	Tkfc	0.0964	0.4495	1.5965	-1.6104	0.0964	0.4495	1.5965	-1.6104	1	1	2	1
P70335	Rock1	0.0831	0.474	1.5475	-1.4504	0.0831	0.474	1.5475	-1.4504	1	1	2	1
Q8R2Y8	Ptrh2	0.0446	0.8456	1.5816	0.1243	0.0446	0.8456	1.5816	0.1243	1	1	2	1
Q9JKF1	Iqgap1	0.0409	-0.4394	1.8382	1.4865	0.0409	-0.4394	1.8382	1.4865	4	1	2	1
P42227	Stat3	0.0371	-0.0561	1.9614	1.4556	0.0371	-0.0561	1.9614	1.4556	4	1	2	1
Q91XL9	Osbpl1a	0.0335	0.6915	1.9783	0.4842	0.0335	0.6915	1.9783	0.4842	4	1	2	1
Q9R0E2	Plod1	0.0253	-0.1369	2.115	0.6605	0.0253	-0.1369	2.115	0.6605	4	1	2	1
Q91W98	Slc15a4	-0.0121	1.2617	1.8863	0.7711	-0.0121	1.2617	1.8863	0.7711	4	1	2	1
Q9CZR2	Naalad2	-0.0428	-0.1893	2.3875	-1.7673	-0.0428	-0.1893	2.3875	-1.7673	1	1	2	1
Q8BSL7	Arf2	-0.0603	-0.1201	3.2935	1.3248	-0.0603	-0.1201	3.2935	1.3248	4	1	2	1
Q9CX34	Sugt1	-0.065	0.2348	2.6425	0.5053	-0.065	0.2348	2.6425	0.5053	4	1	2	1
Q8R2Q8	Bst2	-0.0808	-0.7553	1.5058	1.1776	-0.0808	-0.7553	1.5058	1.1776	4	1	2	1
P62996	Tra2b	-0.0833	0.3032	2.5157	0.5529	-0.0833	0.3032	2.5157	0.5529	4	1	2	1
P01901	H2-K1	-0.1001	-1.0006	2.0215	0.4531	-0.1001	-1.0006	2.0215	0.4531	4	1	2	1
Q62448	Eif4g2	-0.1045	0.5995	1.7121	0.9199	-0.1045	0.5995	1.7121	0.9199	4	1	2	1
O54774	Ap3d1	-0.1107	-0.0158	2.6032	1.1184	-0.1107	-0.0158	2.6032	1.1184	4	1	2	1
Q5FWI3	Cemip2	-0.112	-1.1541	2.1545	0.4818	-0.112	-1.1541	2.1545	0.4818	4	1	2	1
Q9Z1M0	P2rx7	-0.1205	-1.6488	1.9408	-2.5835	-0.1205	-1.6488	1.9408	-2.5835	2	1	2	1
Q9QYB1	Clic4	-0.125	0.707	2.1886	0.9464	-0.125	0.707	2.1886	0.9464	4	1	2	1
O35963	Rab33b	-0.1651	0.0699	1.7218	1.3381	-0.1651	0.0699	1.7218	1.3381	4	1	2	1
P61982	Ywhag	-0.1814	-0.2358	1.7308	-0.4081	-0.1814	-0.2358	1.7308	-0.4081	3	1	2	1
P06339	H2-T23	-0.1917	-1.6	2.5169	0.6513	-0.1917	-1.6	2.5169	0.6513	3	1	2	1
Q60634	Flot2	-0.2011	-0.754	1.5679	0.3014	-0.2011	-0.754	1.5679	0.3014	3	1	2	1
Q8K386	Rab15	-0.2021	0.1197	1.7195	1.3104	-0.2021	0.1197	1.7195	1.3104	4	1	2	1
O55131	Septin7	-0.2079	-0.8718	1.9867	0.4219	-0.2079	-0.8718	1.9867	0.4219	4	1	2	1
P61211	Arl1	-0.2144	0.8077	2.0698	1.3444	-0.2144	0.8077	2.0698	1.3444	4	1	2	1
Q9Z0L8	Ggh	-0.2237	-3.1246	1.5539	1.3502	-0.2237	-3.1246	1.5539	1.3502	3	1	2	1
Q8VCW4	Unc93b1	-0.2462	-1.1401	1.6389	1.2345	-0.2462	-1.1401	1.6389	1.2345	4	1	2	1
Q6P9J9	Ano6	-0.2645	0.3838	1.9626	0.0945	-0.2645	0.3838	1.9626	0.0945	4	1	2	1
Q9QZE5	Copg1	-0.3012	-0.5669	1.5272	-0.5402	-0.3012	-0.5669	1.5272	-0.5402	3	1	2	1
P20152	Vim	-0.3049	0.4749	1.7717	0.8366	-0.3049	0.4749	1.7717	0.8366	4	1	2	1
Q8R1K1	Ubac2	-0.3117	0.462	2.916	-0.7376	-0.3117	0.462	2.916	-0.7376	4	1	2	1
Q9D0L7	Armc10	-0.339	-1.0719	1.6861	-0.1675	-0.339	-1.0719	1.6861	-0.1675	3	1	2	1
Q07076	Anxa7	-0.3421	-2.4693	2.7681	0.1727	-0.3421	-2.4693	2.7681	0.1727	3	1	2	1
Q8BGG9	Acnat2	-0.3441	-0.6209	2.1797	0.5681	-0.3441	-0.6209	2.1797	0.5681	4	1	2	1
Q9D3N8	Grtp1	-0.3695	-2.1119	2.2647	0.6693	-0.3695	-2.1119	2.2647	0.6693	3	1	2	1
Q8BGF6	Elmod2	-0.3759	-1.6881	2.9938	1.0953	-0.3759	-1.6881	2.9938	1.0953	3	1	2	1
P19639	Gstm3	-0.3898	-0.8406	3.3069	-0.7996	-0.3898	-0.8406	3.3069	-0.7996	4	1	2	1
P58771	Tpm1	-0.3993	-0.3033	2.0945	0.9849	-0.3993	-0.3033	2.0945	0.9849	4	1	2	1
P24547	Impdh2	-0.4048	-0.2963	1.7902	0.5337	-0.4048	-0.2963	1.7902	0.5337	4	1	2	1
P62748	Hpcal1	-0.4308	-0.5715	1.8073	0.6026	-0.4308	-0.5715	1.8073	0.6026	4	1	2	1
Q8VD31	Tapbpl	-0.4342	-0.3108	1.7223	1.0678	-0.4342	-0.3108	1.7223	1.0678	4	1	2	1
P46735	Myo1b	-0.4383	0.0066	2.0752	0.0947	-0.4383	0.0066	2.0752	0.0947	4	1	2	1
O88736	Hsd17b7	-0.4636	-0.1951	2.1094	0.6941	-0.4636	-0.1951	2.1094	0.6941	4	1	2	1
O88456	Capns1	-0.4919	-0.6219	2.6754	0.2341	-0.4919	-0.6219	2.6754	0.2341	4	1	2	1
Q63961	Eng	-0.5514	-1.5672	2.314	0.7398	-0.5514	-1.5672	2.314	0.7398	3	1	2	1
Q61490	Alcam	-0.573	-1.7095	2.0013	-1.496	-0.573	-1.7095	2.0013	-1.496	3	1	2	1
Q8VHQ9	Acot11	-0.6853	0.3621	1.59	-0.652	-0.6853	0.3621	1.59	-0.652	1	1	2	1
Q99N91	Mrpl34	-0.7252	-1.3325	2.253	-1.4739	-0.7252	-1.3325	2.253	-1.4739	3	1	2	1
Q0GNC1	Inf2	-0.7254	-0.0969	2.2969	0.7365	-0.7254	-0.0969	2.2969	0.7365	4	1	2	1
Q99J39	Mlycd	-0.7832	-1.176	1.6831	0.9378	-0.7832	-1.176	1.6831	0.9378	3	1	2	1
Q6ZPE2	Sbf1	-0.7973	0.9431	1.9897	0.8879	-0.7973	0.9431	1.9897	0.8879	4	1	2	1
Q9JJW0	Pxmp4	-0.8448	0.5713	1.5189	0.8225	-0.8448	0.5713	1.5189	0.8225	4	1	2	1
Q99KC8	Vwa5a	-0.8552	-1.8047	1.8624	0.5177	-0.8552	-1.8047	1.8624	0.5177	3	1	2	1
Q8BT60	Cpne3	-0.9071	-0.2795	1.9103	0.3983	-0.9071	-0.2795	1.9103	0.3983	4	1	2	1
Q5FW60	Mup20	-0.9424	0.6888	1.6611	0.8082	-0.9424	0.6888	1.6611	0.8082	4	1	2	1
P47753	Capza1	-0.9448	-0.6192	2.7697	1.499	-0.9448	-0.6192	2.7697	1.499	4	1	2	1
P27612	Plaa	-0.9813	-0.5452	1.7004	1.0435	-0.9813	-0.5452	1.7004	1.0435	3	1	2	1
Q923B6	Steap4	-0.9818	0.07	1.7666	0.5315	-0.9818	0.07	1.7666	0.5315	4	1	2	1
Q8R5M8	Cadm1	-0.9888	-1.8158	1.6126	0.6481	-0.9888	-1.8158	1.6126	0.6481	3	1	2	1
Q8VD66	Abhd4	-1.029	0.555	2.0306	-0.5909	-1.029	0.555	2.0306	-0.5909	1	1	2	1
A1L314	Mpeg1	-1.0924	-1.289	2.0965	1.1705	-1.0924	-1.289	2.0965	1.1705	3	1	2	1
Q9Z1Q2	Abhd16a	-1.0994	0.6644	1.7864	1.2726	-1.0994	0.6644	1.7864	1.2726	4	1	2	1
Q99KE1	Me2	-1.1134	-1.7066	1.8259	1.2149	-1.1134	-1.7066	1.8259	1.2149	3	1	2	1
Q99J47	Dhrs7b	-1.136	-0.181	1.643	0.7139	-1.136	-0.181	1.643	0.7139	4	1	2	1
P11714	Cyp2d9	-1.1635	-0.9749	1.5376	0.9262	-1.1635	-0.9749	1.5376	0.9262	3	1	2	1
Q9D1P4	Chordc1	-1.2211	-1.4208	1.8019	0.0251	-1.2211	-1.4208	1.8019	0.0251	3	1	2	1
Q921M4	Golga2	-1.2296	0.5009	2.2288	-0.7005	-1.2296	0.5009	2.2288	-0.7005	1	1	2	1
Q80SU7	Gvin1	-1.3372	-1.2073	2.3197	0.4368	-1.3372	-1.2073	2.3197	0.4368	3	1	2	1
Q3KNM2	March5	-1.3471	-0.9327	1.9263	1.2284	-1.3471	-0.9327	1.9263	1.2284	3	1	2	1
P97379	G3bp2	-1.3602	-0.5392	2.6105	-1.3325	-1.3602	-0.5392	2.6105	-1.3325	3	1	2	1
P42225	Stat1	-1.3754	-2.0675	1.5913	0.6202	-1.3754	-2.0675	1.5913	0.6202	3	1	2	1
O08528	Hk2	-1.3781	-1.6002	1.7193	0.6362	-1.3781	-1.6002	1.7193	0.6362	3	1	2	1
Q62293	Tgtp1	-1.4303	-1.2366	1.6237	0.0526	-1.4303	-1.2366	1.6237	0.0526	3	1	2	1
Q9WTK3	Gpaa1	-1.479	0.8112	1.6781	1.0833	-1.479	0.8112	1.6781	1.0833	4	1	2	1
Q60766	Irgm1	-1.4933	-0.8764	1.5519	0.7675	-1.4933	-0.8764	1.5519	0.7675	3	1	2	1
Q8R0W0	Eppk1	-1.5	0.4451	1.5902	-0.0627	-1.5	0.4451	1.5902	-0.0627	1	1	2	1
Q64339	Isg15	-1.5059	-1.8169	1.6469	1.1608	-1.5059	-1.8169	1.6469	1.1608	3	1	2	1
P11928	Oas1a	-1.6387	-2.0128	1.6493	1.2266	-1.6387	-2.0128	1.6493	1.2266	3	1	2	1
Q61233	Lcp1	-1.6461	-2.6466	1.8184	0.814	-1.6461	-2.6466	1.8184	0.814	3	1	2	1
Q62426	Cstb	-1.6488	-0.5104	2.1072	1.0451	-1.6488	-0.5104	2.1072	1.0451	3	1	2	1
Q99JY3	Gimap4	-1.7175	-1.14	1.6134	0.3577	-1.7175	-1.14	1.6134	0.3577	3	1	2	1
Q8VCM5	Mul1	-1.7566	-2.7382	2.2132	1.1298	-1.7566	-2.7382	2.2132	1.1298	3	1	2	1
Q8BRK9	Man2a2	-1.8012	0.8565	2.4969	0.3255	-1.8012	0.8565	2.4969	0.3255	4	1	2	1
Q921M7	Fam49b	-1.835	-1.8173	2.1083	1.4942	-1.835	-1.8173	2.1083	1.4942	3	1	2	1
Q8BJS4	Sun2	-1.8829	0.6637	1.6163	1.106	-1.8829	0.6637	1.6163	1.106	4	1	2	1
O08734	Bak1	-1.8911	-2.2375	2.2617	1.2738	-1.8911	-2.2375	2.2617	1.2738	3	1	2	1
Q64735	Cr1l	-2.003	-0.7314	1.5379	0.1316	-2.003	-0.7314	1.5379	0.1316	3	1	2	1
